# Supplementary material
Source: MDPI journal article supplement (https://www.mdpi.com/1999-4907/14/8/1591)
Supplement: s1 [file s1]

Archive with 9 entries (9 files):
- File S1 Sequences of per SLAF markers  on the 11 linkage groups (LGs) for the integrated map.xlsx
- File S2 Markers genotypes of per SLAF marker for each F1 individual.xlsx
- File S3 The SLAF markers as well as their locations on the 11 linkage groups (LGs) for the integrated map.xlsx
- File S4 Sequences containing SNPs. SNP loci are all in lowercase.xlsx
- File S5 Haplotype maps of the integrated map.xlsx
- File S6 Heat maps of the integrated map.xlsx
- File S7 Phenotype data of F1 offspring individuals.xlsx
- File S8 The frequency distribution graphs for each trait.pdf
- File S9 Quantitative trait loci of  traits for each traits.pdf
