# Supplementary material
Source: MDPI journal article supplement (https://www.mdpi.com/1999-4907/14/8/1591)
Supplement: s1 [file s1 › File S1 Sequences of per SLAF markers on the 11 linkage groups (LGs) for the integrated map.xlsx]

## Sheet: LG1
>Marker33787	GGACTTGCTGTCATTGTATTCCATTGAAATGATGGCTCACGGCTAGCATAATTGTAACTAGAACATCTAACAAGAATCTCATTTCTTTATGTTTTGTTGGXXXXXXXXXXAATTCAAACTATAATATATGACAAAAAATCTCTATTTCATTATGACTTGATGGATGATCATATCTTGCTGCAAATCCCCCATTTTGGCATACATTGTGAG	GGACTTGCCGTCATTGTATTCCATTGAAATGATGGCTCACAGCTAGCATAATTGTAACTAGAACATCTAACAAGAATCTCATTTCTTTATGTTTTGTTGGXXXXXXXXXXAATTCAAACTATAATATATGACAAAAAATCTCTATTTCATTATGACTTGATGGATGATCATATCTTGCTGCAAATCCCCCATTTTGGCATACATTGTGAG
>Marker51924	CTTTGCCAAGAGGAAGGGTCAGTATGGAGCATGCGAAAAGATATTTTGGCCCTTACAAAAGAAATCCAAACCATCTATGATCAAAAGGAAGATATGGCAAXXXXXXXXXXGGGAAAGAATGTGCCAACTTCTTGCAATGATAGGCAACGAAAGTGTATACTTCTTTATTTGATAAGCCTAATTCTTGCATAAATGAACATAAAACACAAT	CTTTGCCAAGAGGAAGGGTTAGTATGGAGCATGCGAAAAGATATTTTGGCCCTTACAAAAGAAATCCAAACCATCTATGATCAAAAGGAAGATATGGCAAXXXXXXXXXXGGGAAAGAATGTGCCAACTTCTTGCAATGATAGGCAACGAAAGTGTATACTTCTTTATTTGATAAGCCTAATTCTTGCATAAATGAACATAAAACACAAT
>Marker38722	CCTTTATTCTTTTAACAGAGAATACAATCTTGGGTTAGTCACCCCGTGGTTTTTCCCTTAATAGGGTTTCCACGTAAAAAGCCTTGTGTTATGTGTATTGXXXXXXXXXXGTGACTGATTAGCTTTTCCCACTGAGGCTATACATCCAGTCCTCAAAATAACCTGCATTTGGTCTTCCCCTCATCTGACTAAGCATAACCATCATGTATT	CCTTTATTCTTTTAACAGAGAATACAATCTTGGGTTAGTCACCCCGTGGTTTTTCCCTTAATAGGGTTTCCACGTAAAAAGCCTTGTGTTATGTGTATTGXXXXXXXXXXATGACTGATTAGCTTTTCCCACTGAGGCTATACATCCAGTCCTCAAAATAACCTGCATTTGGTCTTCCCCTCATCTGACTAAGCATAACCATCATGTATT
>Marker92036	TTCATTGTGTATTGTTCCTTTATTTACATTCCATATTTCTGCATCTACAGTTACAATGAATGTAATGTTGCAAAATACTTCATATACATTTAGTGTAAGGXXXXXXXXXXTCTATAATAACCTATCTCAATTTTTGTCAGCTCCAAATTATTTGACTATGGTGGAAACGAATGTAACATTGCAAAATGCTTCATTTGTGTTTATTATAAG	TTCATTGTGTATTGTTCCTTTATTTACATTCCATATTTCTGCATCTACAGTTACAATGAATGTAATGTTGCAAAATACTTCATATACATTTAGTGTAAGGXXXXXXXXXXTCTATAATAACCTATCTCAATTTTGGTCAGCTCCAAATTATTTGACTATGGTGGAAACGAATGTAACATTGCAAAATACTTCATTTGTGTTTATTATAAG
>Marker110655	CCTAATGATGCAAGATCAAACCTGTGAAGTATAAAACCATTCTCTGCATCTGCAAGACACATATGATGTGATCATCACAAGACATTAAGGATTTCAAACAXXXXXXXXXXATAGGATACATTTGACACCAATGAAAACAATGATATGTTGACATCAATGACAACATCGATTAGGCACATACTTGTAACACTTTTATAAACACAAGAACAT	CCTAATGATGCAAGATCAAACCTGTGAAGTATAAAACCATTCTCTGCATCTGCAAGACACATATGATGTGATCATCACAAGACATTAAGGATTTCAAACAXXXXXXXXXXATAGGATACATTTGACACCAATGAAAACAATGATATGTTGACATCAATGACAACATCAATTAGGCACATACTTGTAACACTTTTATAAACACAAGAACAT
>Marker90084	ACAATTGCAACAAGTTTGGACATGTTGCAAGATTTTACAGAAGCAAGAATGTGAAAAGAAATTACTATGCTAAAGAAAGGAAAACAGAGAAGAGGAATGAXXXXXXXXXXGTCAGGACTAAGACTGTATTTGAGAAGGATAAAAGAAGAATTGTGGAAAAAGGTTCAGGTTCATTGTTCCTGCACAGAGCAAGTCTTCATGATGATTGAT	ACAATTGCAACAAGTTTGGACATGTTGCAAGATTTTGCAGAAGCAAGAATGTGAAAAGAAATTACTATGCTAAAGAAAGGAAAACAGAGAAGAGGAATGAXXXXXXXXXXTCAGGACTAAGACTGTATTTGAGAAGGATAAAAGAAGAATTGCGGAAAAAGGTTCAGGTTCATTGTTCCCTACACAGAGCAAGTCTTCATGATGATTGAT
>Marker67682	TTGTGTAACCTAATGATAACCTATCATGGATTGATACTCTTTCTCTTTTGTCACCTTACTAGCTAAGGTCTTATCTAGTATCCTATCCATAGTGTTAGCCXXXXXXXXXXTAGGGTCCATGTTTACCAGGCATGCAAGCACAAAGTAAGGCCCAATTCCAAAGATAAAATCTTGATGCACGACATCAACCTATCCAAAGAAAAGAAAACA	TTGTGTAACCTAATGATAACCTATCATGGATTGATACTCTTTCTCTTTTGTCACCTTACTAGCTAAGGTCTTATCTAGTATCCTATCCATAGTGTTAGCCXXXXXXXXXXTAGGGTCCATGTTTGCCAGGCATGCAAGCACAAAGTAAGGCCCAATTCCAAAGATAAAATCTTGATGCACGACATCAACCTATCCAAAGAAAAGAAAACA
>Marker281708	GAATGTATATAAGGGTAATTATAAATGTAGTAATGGAAAAGTGGAACATGAAGGGGCATGCAAATCCAACAATAATACTATTAGGTTAATGAATTATCATXXXXXXXXXXCATGTAACTTTGGCAAATTACATATCTAAGCAATATTGTGATCAATGGGGTTGCCTCTTAGTGCTTGTGTTGCATTTGTATAGGAAACAAGGTATAATAG	GAATGTATATAAGGGTAATTATAAATGTAGTAATGGAAAAGTGGAACATGAAGGGGCATGCAGATCCAACAATAATACTATTAGGTCAATGAATTATCATXXXXXXXXXXCATGTAACTTTGGCAAATTACATATCTAAGCAATATTGTGATCAATGGGGTTGCCTCTTAGTGCTTGTGTTGCATTTGTATAGGAAACAAGGTATAATAG
>Marker17195	AATGCACTAAGACAGAGGTCAAAAGTGCAGGAATACAGAGTATATGCATAAAACTAGCAGATGCATTGTATCAGAGGTTATATGTGGCGAAGTAGAGCCTXXXXXXXXXXCAAACAAAAGATGAAAACTTTGTAAACCTCAATATTTCATAGCTTCCATTGGTTGCCTATCCCAATCAATCTTGCATGTATGAATAAGGCCCTCAGAGAG	AATGCACTAAGACAGAGGTCAAAAGTGCAGGAATACAGAGTATATGCATAAAACTAGCAGATGCATCGTATCAGAGGTTATATGTGGCGAAGTAGAGCCTXXXXXXXXXXCAAACAAAAGATGAAAACTTTGTAAACCTCAATATTTCATAGCTTCCATTGGTTGCCTATCCCAATCAATCTTGCATGTATGAATAAGGCCCTCAGAGAG
>Marker236364	GTATTTTACAACAGATAAAGATATGGCCTCATGGCTTGGAGGATAGCTAGAGACATCTATGAGGTATGCATGATCCAAGTTTCAGAGCATAAAAGTTACCXXXXXXXXXXTTTCTCTATTGGCTGACATTAAAAAAACCATATTTTGGTAACCAACATAAGGCTTGATAAAAGTGGCTAAGCGTTAGGGTTTTCGTTGATATTGTATTGT	GTATTTTACAACAGATAAAGATATGGCCTCATGGCTTGGAGGATAGCTAGAGACATCTATGAGGTATGCATGATCCAAGTTTCAGAGCATAAAAGTTACCXXXXXXXXXXTTTCTCTATTGGCTGACATTAAAAAAACCCTATTTTGGTAACCAACATAAGGCTTGATAAAAGTGGCTAAGCATTAGGGTTTTCGTTGATATTGTATTGT
>Marker83845	AATGTTCTCTTTTACTAAGTTGAAATTGTGCAAGATAAGGAAAAATTTCAGCTTACTAGAAGGGGACATTACATTTTCATCATTGATTTATTTAGTTTTTXXXXXXXXXXTTGGGTGCTCGCTCTAGTGTCCTCTGCATCTGAATTTCAGGAAACAGAAGTTACAGGGCTGATCAGTGTCAGAAGGATGTCCAGATTCTGCGACGAAACT	AATGTTCTCTTTTACTAAGTTGAAATTGTGCAAGGTAAGGAAAAATTTCAGCTTACTAGAAGGGGACATTACATTTTCATCATTGATTTATTTAGTTTTTXXXXXXXXXXTTGGGTGCTCGCTCTAGTGTCCTCTGCATCTGAATTTCAGGAAACAGAAGTTACAGGGCTGATCAGTGTCAGAAGGATGTCCAGATTCTGCGACGAAACT
>Marker28115	GATAATAAAGTTTTGCTTGTTCTTACACTTGCTTGAACTTAGGATCTTCAAAACATCAATATCGATAATGAAGTTTTGCTTGTTTCAACACTTGCAAAGAXXXXXXXXXXATTTTGCAAATTCTAGAACTGTGCATGAACTTGGATCAATCTTGCATCTATGATTGCGACCCAAATGGTGTGGCCTTGAACTTAGGATCTTCAAAACATC	GATAATAAAGTTTTGCTTGTTCTTACACTTGCTTGAACTTAGGATCTTCAAAACATCAATATCAATAATGAAGTTTTGCTTGTTTCAACACTTGCAAAGAXXXXXXXXXXATTTTGCAAATTCTAGAACTGTGCATGAACTTGGATCAATCTTTCATCTATGATTGTGACCCAAATGGTGTGGCCTTGAACTTAGGATCTTCAAAACATC
>Marker235776	GAGCATGTGACAAGAGCAGAAGAAGAGAGACCTTGCTTAATGTAAAAGCAGAGCAGTGAAACATAGTAGTTAAGATGAAGAATTTTGAGATAGTATTTTGXXXXXXXXXXTCATGTGTGATAGATTGTGATTGTTTCTTCTAAGCTTATTTTGCTTTGTTTTTGCATGTGGTAAATGGATTACTAGTTTAATAAGGAAAAATTTTATTAG	GAGCATGTGACAAGAGCAGAAGAAGAGAGACCTTGCTTAATGTAAAAGCAGAGCAGTGAAACATAGTAGTTAAGATGAAGAATTTTGAGATAGTATTTTGXXXXXXXXXXTCATGTGTGATAGATTGTGATTGTTTCTTCTAAGCTTATTTTGCTTTGTTTTTGCATGTGGTAAATGGATTACTAGTTTAATAAGGAAAAAGTTTATTAG
>Marker68954	ACAATCTCATAGCATGCCCTAATAGTCCTTGTGGGTGAGCAGGAGCCAAATGAGTCAATTGTTCATTTACCAATTTCCCGCAATAGTTTCAAGGCAGTCTXXXXXXXXXXCTGTGGCCCCACAGTGGTCTCAAAATTGATTGTCAAGCTTGCAGTATGAAGTTTGATGTAACACATAATGGACACCGTGGTCCCATGGTGGCTTCAAAGT	ACAATCTCGTAGCATGCCCTAATAGTCCTTGTGGGTGAGCAGGAGCCAAATGAGTCAATTGTTCATTTACCAATTTCCCGCAGTAGTTTCAAGGCAGTCTXXXXXXXXXXCTGTGGCCCCATAGTGGTCTCAAAATTGATTGTCAAGCTTGCAGTATGAAGTTTGATGTAACACATAATGGACACTGTGGTCCCATGGTGGCTTCAAAGT
>Marker126954	ATTGCTTCATCCTCTTCTGTATATGGTCTTCTATCACCACATTGATATCTTCCTCTTGGGAATATTCCTCCTCTTCCTCTTTGTTGATTTTGTCTAATCTXXXXXXXXXXTTGCAATTCTACACCGAACATATTCAGCCGATCATTCATCACAGATGGGAGAAGCTCAACACTCCCTTGCACATGGTTGCCTATGCATTGAACCCAAAGT	ATTGCTTCATCCTCTTCTATATATGGTCTTCTATCACCACATTGATATCTTCCTCTTGGGAATATTCCTCCTCTTCCTCTTTGTTGATTTTGTCTAATCTXXXXXXXXXXTTGCAATTCTACACCGAACATATTCAGCCGATCATTCATCACAGATGGGAGAAGCTCAACACTCCCTTGCACATGGTTGCCTATGCATTGAACCCAAAGT
>Marker333111	ATCTTTATCATGAACGGACACCAGATGCTGACAACTACTCATAAGTCACCACATTTTGATTTAACACAATGATGGATTGAACCACAAGAGCCTGTGACTCXXXXXXXXXXACAACCAATCCAAAACCAAAACCAACAGTTATCAGCAGTCCAGAGCCAAATTCACATTTACTTATGCATCTCAGAAGACCTTGCACCTACAGGAAACCCT	ATCTTTATCATGAACGGACACCAGATGCTGACAACTACTCATAAGTCACAACATTTTGATTTAACACAATGATGGATTGAACCACAAGAGCCTGTGACTCXXXXXXXXXXACAACCAATCAAAAACCAAAACCAACAGTTATCAGCAGTCCAGAGCCAAATTCACATTTACTTATGCATCTCAGAAGACCTTGCACCTACAGGAAACCCT
>Marker76041	AAAAGATATATATTGCCACTCATTTTAGAAAACCACATATATGATACTAAATGTTAACCAAATAGATGTTAACAAAAATAAAGTTATCATTTGGTGGCATXXXXXXXXXXCATGATAAATTTAATTAATAATAATTAAAATCAGCAAACCATTATAACACAAAGTTAAATATTCAGACACCATTATAACATAAATTGACCAGAAAAAGAG	AAAAGATATATATTGCCACTCATTTTAGAAAACCACATATATGATACTAAATGTTAACCAAATAGATGTTAACAAAAATAAAGTTATCATTTGGTGGCATXXXXXXXXXXCATGATAAATTTAATTAGTAATAATTAAAATCAGCAAACCATTATAACACAAAGTTAAATATTCAGACACCATTATAACATAAATTGACCAGAAAAAGAG																							AAAAGATATATATTGCAACTCATTTTAGAAAACCACATATATGATACTAAATGTTAACCAAATAGATGTTATCAAAAATAAAGTTATCATTTGGTGGCATXXXXXXXXXXCATGATAAATTTAATTAATAATAATTAAAATCAGCAAACCATTATAACACAAAATTAAATATTCAGACACCATTATAACATAAATTGACCAGAAAAAGAG
>Marker137945	TTGTTCTTGGAAAATTGAAACTTAATATATCAGTTGGCTCTAAGTTCCTTAATTTTTTGAACCCTTACAAACTATATTTCTTTTTCAAGCATATATTGTGXXXXXXXXXXACCTTTGTTGATTTGTTTTCTTCTTGTAACTTAACAACCGGTGTTTTGTCCTTTCCAACAAATGGAACCGACGCTAACTCCAAACACAATACAAATGATG	TTGTTCTTGGAAAATTGAAACTTAATATATCAGTTGGCTCTAAGTTCCTTAATTTTTTGAACCCTTACAAACTATATTTCTTTTTCAAGCATATATTGTGXXXXXXXXXXACCTTTGTTGATTTGTTTTCTTCTTGTAACTTAACAACCGGTGTTTTGTCCTTTCCAACAAATGGAACCGATGCTAACTCCAAACACAATACAAATGATG
>Marker111484	TTTCTAGAGAAGCCAATGCTTCATGGCTTCTAAAGCTTTCCAAATTCTTTTAATAACAAATTTGAACCCTTGGATCTAAATGATGTCTTTCATAATGAGAXXXXXXXXXXTGTGAGTCTCAAAAGAGGCCCAAAGAAAGTCCCTAGAAAGCTTTTCAAGCTTTTGATAGGAGGATTTAGAAGGGACCCAACAAGAGGAATAATAAACATG	TTTCTAGAGAAGCCAATGCTTCATGGCTTCTAAAGCTTTCCAAATTCTTTTAATAACAAATTTGAACCCTTGGATCTAAATGATGTCTTTCATAATGAGAXXXXXXXXXXTGTGAGTCTCAAAAGAGGCCCAAAGAAAGTCCCTAGAAAGCTTTTCAAGCTTCTGATAGGAGGATTTAGAAGGGACCCAACAAGAGGAATAATAAACATG																							TTTCTAGAGAAGCCAATGCTTCATGGCTTCTGAAGCTTTCCAAATTCTTTTAATAACAAATTTGAACCCTTGGATCTAAATGATGTCTTTCATAATGAGAXXXXXXXXXXTGTGAGTCTCAAAAGAGGCCCAAAGAAAGTCCCTAGAAAGCTTTTCAAGCTTCTGATAGGAGGATTTAGAAGGGACCCAACAAGAGGAATAATAAACATG
>Marker233375	GTCTTTTAGATGATTTCGCTGCAACAAGCTTGGGTATAAGATTGCAAAGTGCTCATCTCAAAATTCTTTGCGATCGTATTGAGTTAAAGGTTCCAAAAATXXXXXXXXXXATAGTAGTTGATCAATTGATGGAGGACGATGCATTGGAGTCACAGCTTTTTAAAGGATTTAGTTTCTCAAGATTTTAAAGAGGGCAAGGACAAATTATTG	GTCTTTTAGATGATTTCGCTGCAACAAGCTTGGGTATAAGATTGCAAAGTGCTCATCTCAAAATTCTTTGCGATCATATTGAGTTAAAGGTTCCAAAAATXXXXXXXXXXATAGTAGTTGATCAATTGATGGAGGACGATGCATTGGAGTCACAGCTTTTTAAAGGATTTAGTTTCTCAAGATTTTAAAGAGGGCAAGGACAAATTATTG
>Marker309219	AACAACCTTAGTCTTCTTCTTAGAGATCACCTCCTGAAACCTGTCCGTATGACCTGCACACACAAAAAGAGGGAAAAGGTTGGGTGCTATTTAGGAGCTTXXXXXXXXXXAGTTCTCTAAATATTTGTTGCATTTAAGTGGATACATTATTTAGGCACTTCTTTTGCACATACTACACATCCTACATTTGCAAGACTTTTAGTTGTCGGG	AACAACCTTAGTCTTCTTCTCAGAGATCACCTCCTGAAACCTGTCCGTATGACCTGCACACACAAAAAGAGGGAAAAGGTTGGGTGCTATTTAGGAGCTTXXXXXXXXXXAGTTCTCTAAATATTTGTTGCATTTAAGTGGATACATTATTTAGGCACTTCTTTTGCACATACTACACATCCTACATTTGCAAGACTTTTAGTTGTCGGG
>Marker150860	CATTGTAAACTTCTTACCTACCTATATTTCCTATAACTCCATAGTTGTCTCATTTACGAGACTATGAAATTCATTTACATCTCCACACATTTCATGTAAAXXXXXXXXXXCCACTGTTTGCATGCATTTCAAACTACATCCATGCTTCCAAATCATACAACCCCATGCTATTCCATATCTCATGGACTTGTTTCATCTCTTTAAAACATG	CATTGTAAACTTCATACCTACCTATATTTCCTATAACTCCATAGTTGTCTCATTTACGAGACTATGAAATTCATTTACATCTCCACACATTTCATGTAAAXXXXXXXXXXCCACTATTTGCATGCATTTCAAACTACATCCATGCTTCCAAATCATACAACCCCATGCTATTCCATATCTCATGGACTTGTTTCATCTCTTTAAAACATG
>Marker214270	TCTCTGACTTACCATCTACTCCAATTTTTTTATTGAATACCTACTTGCAACCAATGTGTTTCCTTTTCTTGGGAAAACTCACAAGATCCTAGGTGTCACAXXXXXXXXXXGGAGAGGATAGGGAGATTCCTCCTAAGGAGGAGGCTGCCATACCTCCTGTTTGTGACCATGCACTAGATGACCCCTCTTGGGAAGAGGGTGACCATTGTA	TCTCTAACTTACCATCTACTCCAATTTTTTTATTGAATACCTACTTGCAACCAATGTGTTTCCTTTTCTTGGGAAAACTCACAAGATCCTAGGTGTCACAXXXXXXXXXXGGAGAGGATAGGGAGATTCCTCCTAAGGAGGAGGCTACCATACCTCCTGTTTGTGACCATGCACTAGATGACCCCTCTTGGGAAGAGGGTGACCATCGTA
>Marker48346	AAAACTTTGATACTTATGTGTTGTCTTTGGGATTTGTGAGATCAAAGTCTGATCATTGTGTTTACTTTAAAACTGAGAATGGCAATCTTCTTATTATTGAXXXXXXXXXXATGTTGCAGGGAATGAAACTTTCTATTGAAGATTGTCCAAAATCTCTTGCTAAGATGGAGGACATGAACAGGGTGCCTTATGCAAGTGCCAAGCAGTGGG	AAAACTTTGATACTTATGTGTTGTCTTTGGGGTTTGTGAGATCAAAGGCTGATCATTGTGTTTACTTTAAAACTGAGAATGGCAATCTTCTTATTATTGAXXXXXXXXXXATGTTGCAGAGAATGAAACTTTCTATTGAAGATTGTCCAAAATCTCTTGCTAAGATGGAGGACATGAACAGGGTGCCTTATGCAAGTGCCAAGCAGTGGG
>Marker154801	ATAATTTATTACAAGGTTATATATTTATGCAATTTCTTAGTCTTTTCCTACCCAACTCACATGTCAAACTCACAACTCATGCAAGTGGAATTTGAACAATXXXXXXXXXXACTGAAACATATAATAATTGAGTAGATTAAATGCATGTTTAGTAAACATATAATAAGTTTTTATGTCATGTTATTTGAAGACATTCATTGTGCACATAAA	ATAATTTATTACAAGGTTATATATTTATGCAATTTCTTAGTCTTTTCCTACCCAACTCACATGTCAAACTCACAACTCATGCAAGTGGAATTTGAACAATXXXXXXXXXXACTGAAACATATAATAATTGAGTAGATTAAATGCATGTTTAGTAAGCATATAATAAGTTTTTATGTCATGTTATTTGAAGACATTCATTGTGCACATAAA
>Marker238503	CACTTTAACAATCAAGACATTCCTTTTTTCTTCATTTTGTCCTATGTTGACTGATGAATATTCTCCTCCATTTGCTTTAGGGAGATCCTTCTATTGTAGCXXXXXXXXXXTAAGTTCCAAGGACACTTGGCAAATCTATAATCACAAAGGTTGTTAGATAGTTAGAGGTTGTTAGGTGATTGTGATCTCCCAGCCACTTGGAGTCAATTC	CACTTTAACAATCAAGACATTCCTTTTTTCTTCATTTTGTCCTATGTTGACTGATGAATATTCTCCTCCATTTGCTTTAGGGAGATCCTTCTATTGTAGCXXXXXXXXXXTAAGTTCCAAGGACACTTGGCAAATCTATAATCACAAAGGTTGTTAGATAGTTAGAGGTTGTTAGGCGATTGTGATCTCCCAGCCACTTGGAGTCAATTC
>Marker64943	TGCGACTATACATGAGGCTATATATGTCCCTACACTACTAACTGTGCCTGCTGGGCGAGAGCTCTATCAACCCATTGTCTCACCCTCCTACCATCCCCATXXXXXXXXXXCTACAAAAACTCTGCTCATAAGATGCACCAAGACCCCATCAAGGATGCTCCTTGTATATCCTAGAAAAGATGGCATTCCCCTGGATCATGCCAAGCTGTC	TGCGACTATACATGAGGCTATATATGTCCCTACACTACTAACTGTGCCTGCTAGGCGAGAGCTCTATCAACCCATTGTCTCACCCTCCTACCATCCCCATXXXXXXXXXXCTACAAAAACTCTGCTCATAAGATGCACCAAGACCCCATCAAGGATGCTCCTTGTATATCCTAGAAAAGATGGCATTCCCCTGGATCATGCCAAGCTGTC
>Marker204198	CATTACTAGACATTATTCCTTTGCTCTCCTTCCTCATTTATATTTCTCTCTTCTCGTTTTCTTGTCATCCATAGTCAGCCACAACTTTTCCTCATGTTCAXXXXXXXXXXTCATCTTCTTGAGCTGATGCCTTGCTGCCTCTGCACTTGGCCTATCTCCTTGTCTCCTCATATCTTCCATCCTTGATGCTATTTTGTTGTCATATAGTTT	CATTACTAGACATTATTCCTTTGCTCTCCTTCCTCATTTATATTTCTCTCTTCTCGTTTTCTTGTCATCCATAGTCAGCCACAACTTTTCCTCATGTTCAXXXXXXXXXXTCATCTTCTTGAGTTGATGCCTTGCTGCCTCTGCACTTGGCCTATCTCCTTGTCTCCTCATATCTTCCATCCTTGATGCTATTTTGTTGTCATACAGTTT
>Marker86390	ACTCTATCAGAGTTATTTCCATTCCAGTGGACCCAACATCAAGTGTTCCCTGATGTCTTACATCCTGCCACCATTGACATTTACATTCCATGCCCACTACXXXXXXXXXXCTCTATCCTTGATCTTCACAAGATCGATGGACCTTGCCTTTGGTGAGTTGCGCTAGGATCCTCCCTTAGTTGCTGATCCTTCGCATGGCGAACTAGGTGT	ACTCTATCAGAGTTATTTCCATTCCAGCGGACCCAACATCAAGTGTTCCCTGATGTCTTACATCCTGCCACCATTGACATTTACATTCCATGCCCACTACXXXXXXXXXXCTCTATCCTTGATCTTCACAAGATCGATGGACCTTGCCTTTGGTGAGTTGTGCTAGGATCCTCCCTTAGTTGCAAATTCTTCGCATGGCGAACTAGGTGT
>Marker41249	ATCCTCATCTTTGCCTTGAAAATGTAGCCTCTCTATCTAATGAAAGTCTTGATTTTTTACACTACTCCTTTGAACTCTCAAGGGTCAAGTCTAACCGCCTXXXXXXXXXXACCACAAATCAAGTATGGCACATACAACAAAATTGCAGTATGTGTAAAGAGGTATACTGGTGGAAAGAGACATGCCCCTATACTTAGTTGGAGACATATA	ATCCTCATCTTTGCCTTGAAAATGTAGCCTCTCTATCTAATGAAAGTCCTGATTTTTTACACTACTCCTTTGAATTCTCAAGGGTCAAGTCTAACCGCCTXXXXXXXXXXACCATAAATCAAGTATGGCACATACAACTAAATTGCAGTATGTGTAAAGAGGTATACGGGTGGAAAGAGACATGCCCCTATACTTAGTTGGAGACATATA
>Marker236941	ATTCATTAGAATTTGCGTTACAACATAAATCAGTATTTGAGGGGGTGGCCTCAGCTACATATGATGATTTGAGATTATGAATGATGAAATGATATTCTTCXXXXXXXXXXAGCGACACTAAGTCCTGCAATAAGAGCTTCATACTCAATAATGTTGTTTTTGCATGAGAAGTTTAGATGATAAGAAAGAGGAATCAACTTATTTGAAGGA	ATTCATTAGAATTTGTGTTACAACATAAATCAGTATTTGAGGGGGTGGCCTCAGCTACATATGATGATTTGAGATTATGAATGATGAAATGATATTCTTCXXXXXXXXXXAGCGACACTAAGTCCTGCAATAAGAGCTTCATACTCAATAATGTTGTTTTTGCATGAGAAGTTTAGATGATAAGAAAGAGGAATCAACTTATTTGAAGGA
>Marker206274	ATAAAACATTTCCTTTCCATGCAAATGTGTTTTACACACTTGAATCCTATTGGAGTTTCTTAATGAGTTTGAGTATCTATGTCCTCCTACTCTTCTCTTAXXXXXXXXXXATTAGATAAGGTCTCCATTATTTGACTCCATGCAAGATAGCCAACATTTCCTTGTCATAAATTAGATTCAACAAATTCTATGGTTCTTCATTCTTGCATG	ATAAAACATTTCCTTTCCATGCAAATTTGTTTTACAAACTTGAATCCTATTGGAGTTTCTTAATGAGTTTGAGTATCTATGTCCTCCTACTCTTCTCTTAXXXXXXXXXXATTAGATAAGGTCTCCATTATTTGACTCCATGCAAGATAGCCAACATTTCCTTCTCATAAATTAGCTTCAACAAATTCTATGGTTCTTCATTCTTGCATG
>Marker119176	TTTCTTAATTTTTAGACCCTTGTCTATCTGATCCTTTGCTTTCTCCAGTTCTTTCCTCAAAGCAATAATTTCTTCTTCAAGTTTGGAGCATTCAACTAATXXXXXXXXXXACTAGAACTTCTTTTCCCATGTGTTCCAATCCAAGATCTACCTCATCTATTAGATTGTATCAAGGAACCCTACTCTGATACCAATTGTTGAACATACAGA	TTTCTTAATTTTTAGACCCTTGTCTATCTGATCCTTTGCTTTCTCCAGTTCTTTCCTCAAAGCAATAATTTCTTCTTCAAGTTTGGAGCATTCAACTAATXXXXXXXXXXACTAGAACTTCTTTTCCCATGTGTTCCAATCCAAGATCTACCTCATCTATTAGATTGTATCAAGGAACCCTACACTGATACCAATTGTTGAACATACAGA																							TTTCTTAATTTTTAGACCCTTGTCTATCTGATCCTTTACTTTCTCCAGTTCTTTCCTCAAAGCAATAATTTCTTCTTCAAGTTTGGAGCATTCAACTAATXXXXXXXXXXACTAGAACTTCTTTTCCCATGTGTTCCAATCCAAGATCTACCTCATCTATTAGATTGTATCAAGGAACCCTACTCTGATACCAATTATTGAACATACAGA
>Marker140144	TAAAGGTAGACTGCTTGGGTTTCCCACCAAATTTTGGGCCCATCCAGAGCCTCTAAGTGCCTCAAATTTGACTTTGAATATTTCAATAGGATTTGTGGAAXXXXXXXXXXTAACAGTAGGTCGCTCTTATTTTTCCTCAAAAAGCTCCTTCTCTTGCTCATCAAACCAACTGACTTGCCAAACCACCAGTCCACCCTTGAAAAGAGAAAT	TAAAGGTAGACTGCTTGGGTTTCCCACCAAATTTTGGGCCCATCCAGAGCCTCTAAGTGCCTCAAATTTGACTTTGAATATTTCAATAGGATTTTTGGAAXXXXXXXXXXTAACAGTAGGTTGCTCTTATTTTTCCTCAAAAAGCTCCTTCTCTTGCTCATCAAACCAACTGACTTGCCAAACCACCAGTCCACCCTTGAAAAGAGAAAT																							TAAAGGTAGACTGCTTGGGTTTCCCACCAAATTTTGGGCCCATCCAGAGCCTCTAAGTGCCTCAAATTTGACTTTGAATATTTCAATAGGATTTGTGGAAXXXXXXXXXXTAACAGTAGGTTGCTCTTATTTTTCCTCAAAAAGCTCCTTCTCTTGCTCATCAAACCAACTGACTTGCCAAACCACCAGTCCACCCTTGAAAAGAGAAAT
>Marker137213	TGTCAGCTAGTTGAGCTATTAAGCATCTTATTGATTGGAGCTTCCCTTGAAGGCAACATAACTATTTGAGATTCTTTGGTGGAGGCATTTCGACTATTACXXXXXXXXXXGCATTCTTGAGGCCAAATGGCATAACAACCTAGTAGTAGGCTCCCCATGGACAAATGAGTGTCATCGTATGTTGGTCTTCTTTAGCTATTCTAATTTGAT	TGTCAGCTAGTTGAGCTATTAAGCATCTTATTGATTAGAGCTTCCCTTGAAGGCAACATAACTATTTGAGATTCTTTGGTGGAGGCATTTCGACTATTACXXXXXXXXXXGCATTCTTGAGGCCAAATGGCATAACAACCTAGTAGTAGGCTCCCCATGGACAAATGAGTGTCATCGTATGTTGGTCTTCTTTAGCTATTCTAATTTGAT
>Marker150382	CTTGTTGACTAAATTATTGTATGCAAACTTTCCTTGTGATAGAACTAGATCCCAATTTCCTTCCTTCTCTCCTACCTAGTATCTCAATAAGTTTCCCAAAXXXXXXXXXXTGCAAATCTATCCACCACTACGAATATAGGATCATTCCTTCTCCGTGTCTTTGGCAATCCTAATATAAAATCCATGCTTATGTCTTCCCAAGGCTTTTCC	CTTGTTGACTAAATTATTGTATGCAAACTTTCCTTGTGATAGAACTAGATCCCAATTTCCTTCCTTCTCTCCTACCTAGTATCTCAATAAGTTTCCCAAAXXXXXXXXXXTGCAAATCTATCCACCACTATGAATATAGGATCATTCCTTCTCCGTGTCTTTGGCAATCCTAATATAAAATCCATGCTTATGTCTTCCCAAGGCTTTTCC
>Marker135866	GATCCTATCTTTGTTTATCCTCTACAACATGTTTGCATGTTAGGGTTTGTCTATATATGGAAACCTAGTCTTTAAGGTCTTATGATCCTAATATTTTCTAXXXXXXXXXXAAGGAGTCACTTAAGTGACATCTTAAGGGTATCGATGTCATAAATTGACTACCCCCTAACCTAGGGCAACCGGTTCCATCTGGTAAGTGTTGTTTGATTG	GATCCTATCTTTGTTTATCCTCTACAACATGTTTGCATGTTAGGGTTTGTCTATATATGGAAACCTAGTCTTTAAGGTCTTATGATCCTAATATTTTCTAXXXXXXXXXXAAGGAGTCACTTAAGTGACATCTTAAGGGTATCGATGTCATAAATTGACTACCCCCTAACCTAGGGCAATCGGTTCCATCTGGTAAGTGTTGTTTGATTG
>Marker92169	AATAATTAAATATGGGGATCAATGGTTTTAGTATGCTCATGGTTTTGGGGAAGATCTAGTTTTACCATAATAAATCGAGTATTTGTCTAATCTTATCTTTXXXXXXXXXXGAATTTTTCCCATCGATGAGGAGTTTCCAACAATATATCTTATGTCACCATTGATGCTATGTTATATATTCTTTTGCATATAGATTTTGATCACTATGTT	AATAATTAAATATGGGGATCAATGGTTTTAGTATGCTCGTGGTTTTGGGGAAGATCTAGTTTTACCATAATAAATCGAGTATTTGTCTAATCTTATCTTTXXXXXXXXXXGAATTTTTCCCATCGATGAGGAGTTTCCAACAATATATCTTATGTCACCATTGATGCTATGTTATATATTCTTTTGCATATAGATTTTGATCACTATGTT
>Marker119180	AAAGAGAGAGGCAATGAAGGCACATTTTCCAATGTGATAAGGTAAGGCGAAAGCATTTAAAACATCTTTCACATAGGTGTCCCTTTGGCTTCTTTTATTAXXXXXXXXXXTTTCTTCTTGTAGGATACTTGCTGATCTTCTTTGATGTATCTTGATATAGAGTAGTAGGAGATGATGATGTTGCTTTCTTCATGAAGAGTAGGAGATGAT	AAAGAGAGAGGCAATGAAGGCACATTTTCCAATGTGATAAGGTAAGGCGAAAGCATTTAAAACATCTTTCACATAGGTGTCCCTTTGGCTTCTTTTATTAXXXXXXXXXXCTTCTTCTTGTAGGATACTTGCTGATCTTCTTTGATGTATCTTGATATAGAGTAGTAGGAGATGATGATGTTGCTTTCTTCATGAAGAGTAGGAGATGAT
>Marker149295	TCTTCTAATAATTCTTAGGTGATTCATTAGTTTTGCTTAATTTGCAACCAGTCACCATGGGAGTGCATACTAGTTTAGAGTCCTCCATCCCAAACTTCTTXXXXXXXXXXCAGTGCCTTTACTGAACCCATGATTACCATAAATGTTTGTCTAACCTTGCATACCAGACTCTGGGGACTTGCTTCAATCCATACAATGCCTTCTTCAATC	TCTTCTAATCATTCTTAGGTGATTCATTAGTTTTGCTTAATTTGCAACCAGTCACCATGGGAGTGCATACTAGTTTAGAGTCCTCCATCCCAAACTTCTTXXXXXXXXXXCAGTGCCTTTACTGAACCCATGATTACCATAAATGTTTGTCTAACCTTGCATACCAGACTCTGGAGACTTGCTTCAATCCATACAATGCCTTCTTCAATC
>Marker563820	CTCTAAATCAATATCACATACATAAGTTGATTTTTTATTCTTATATGCTTCAAATTGTTTCCCATAAATGGATGGATCCATGTAAAGAGAGGCTATAAGCXXXXXXXXXXAAACATGAATGCCTAATAAAATGCTATAACACAATCAACCTAGAATCACATGGAACAAAGTATCTAAAGTAAGTGAGTGAACTATGATAGGACAAATAAT	CTCTAAATCAATATCACATACATAAGTTGATTTTTTATTCTTATATGCTTCAAATTGTTTCCCATAAATGGATGGATCCATGTAAAGAGAGGCTATAAGCXXXXXXXXXXAAACATGAATGCCTAATAAAATGCTATAACACAATCAACCTAGAATCACATGGAACAAAGTATCTAAAGTAAGTGAGCGAACTATGATAGGACAAATAAT
>Marker204730	TGCATAAGGCCTTTCATGGTCTCCAATGATCAAGACAAACTTGCAATGGCGCCCTCCATCCTTTGGAATCTTGCTTCAGCATCCAGATAATTCCCTTCTCXXXXXXXXXXCAAAAGAGAGAGTAAAGACACCATAAACACTAGAGATACCTTGGAGAAACCCTTGTGGGGTGCAAACTCTAGTTAAAATGTGGCTAACAATCCACATAGA	TGCATAAGGCCTTTCATGGTCTCCAATGATTGAGACAAACTTGCAATGGCACTCTCCATCCTTTGGAATCTTGCTTCAGCATCCAGATAATTCCCTCCTCXXXXXXXXXXCAAAAGAGAGAGTAAAGACACCATAAACACTAGAGATACCTTGGAGAAACCCTTGTGGGGTGCAAACTCTAGTTAAAATGTGGCTAACAATCCACATAGA
>Marker131667	TTGTTCAAGAGGGCCTAAGCCCTTAACTTGATAGTTCATGTTTTGGAGGATGCGATCAACAATGGGACTAGGTGTAGGTGGAACATTAGACATGAGTCCTXXXXXXXXXXTGAGAAGTGGAAGTTGTCTCATTAGGGTTAGATGGAGGATGGATAGGAGCAATTTGGATACCTTGCTCATGGATGGGTATGGGATTATGGATAAGATCAA	TTGTTCAAGAGGGCCTAAGCCCTTAACTTGATAGTTCATGTTTTGGAGGATGCGATCAACAATGGGACTAGGTGTAGGTGGAACATTAGACACGAGTCCTXXXXXXXXXXTGAGAAGTGGAAGTTGTCTCATTAGGGTTAGATGGAGGATGGATAGGAGCAATTTGGATATCTTGCTCATGGATGGGTATGGGATTATGGATAAGATCAA
>Marker41682	TCTCACACTATTTTATTGGCCTTTCCCATATTAACAAATCAGTTAAATATCTGTTCAATTTTATATTTTTTATTTACATTTGTCTTACCTTTGGAAAAAAXXXXXXXXXXATATTTTTATGCATTTATAAAAGAGATGTGTCAGCATTGGTAACAATGAAAGGGAAGTTTTTAATGATATATACAAGACTAGGGACGGCTGGGCTTAAAG	TCTCACACTATTTTATTGGCCTTTCCCATATTAACAAATCAGTTAAATATCTGTTCAATTTTATATTTTTTATTTACATTTGTCTTACCTTTGGAAAAAAXXXXXXXXXXTTATATTTTTATGCATTTATAAAAGAGGTGTCAGCATTGGTAACAATGAAAGGGAAGTTTTTAATGATGTATACAAGACTAGGGACGGCTGGGCTTAAAG
>Marker112171	AGTAATCTTAGAAATTGCTAACTTAAAATAAAAATTGATGTGTTGGATAAACAAGATGAATGAATCCTGTATTTTTTAAGCTATGTTTAAGAGTAAGAACXXXXXXXXXXACTGGAAGCTCAGGCATGCCCTTCAGAGCAAGAAAACACCCCTATGTTGAAGCTAGTATATTAAGATGGGGCATATTATCATTTTCAAATTCATTGTTTG	AGTAATCTTAGAAATTGCTAACTTAAAATAAAAATTGATGTGTTGGATAAACAAGATGAATGAAACCTGTATTTTTTAAGCTATGTTTAAGAGTAAGAACXXXXXXXXXXACTGGAAGCTCAGGCATGCCCTTCAGAGCAAGAAAACACCCCTATGTTGAAGCTAGTATATTAAGATGGGGCATATTATCATTTTCAAATTCATTGTTTG
>Marker681966	TTACCTATCTTGGTGAGTGTGTTAAACCACCCATCATGTTCACCACTCTTCCATATAATGGCTTCCTTTGAAGCACTATACATCATAAAATACATAACATXXXXXXXXXXTTTAAAATTTTGGAAGAAAATAGTTCAATTGCCTATAGGTTGCCCCTCTGTCTTTCGTTATCCAAAATAAATAATGTCTTTTGCATTACATTATTAAGGA	TTACCTATCTTGGTGAGTGTGTTAAACCACCCATCATGTTCACCACTCTTCCATATAATGGCTTCCTTTGAAGCACTATACATCATAAAATACATAACATXXXXXXXXXXTTTAAAATTTTGGAAGAAAATAGTTCAATTGCCTATAGGTTGCCCCTCTGTCTTTCCTTATCCAAAATAAATAATGTCTTTTGCATTACATTATTAAGGA
>Marker348741	CTCTGTGCTTCATTGCATACTAAAGATAACTTTTTAATGAAAAAAAACCCTTTATTGGTCAGGATGCAAGATTATTGTCAACAGTTTTGGGTGCAATTGGXXXXXXXXXXTTATCCACTGCAAAGTATTTAACCGGAACCTTAAGCCTGCATTTCCGAAAGATATTGACAGATCGTATTCATGCAGACTATTTTCAGGTATGTGGATATC	CTCTGTGCTTCATTGCATACTAAAGATAACTTTTTAATGAAAAAAAAACCCTTTATTGGTCAGGATGCAAGATTATTGTCAACAGTTTTAGGTGCAATTGXXXXXXXXXXTTATCCACTGCAAAGTATTTAACCGGAACCTTAAGCCTGCATTTCCGAAAAATATTGACAGATCGTATTCATGCAGACTATTTTCAGGTATGTGGATATC
>Marker29038	AAGGCTACCCAAATTGTATATCCATTGACATTCAAAAATATTTCAAAAACCCAAAAAAAATCAAATATTTCCAAAAAGACAAAAAAATCAAAATATGTCAXXXXXXXXXXCCCATTAATAAAACACAAATTAGAACTACATCTCATCTTTATCATTAAGTGCCTTGATCCCGTGGATATAGGGTATGCAGGCAATCTAGGATACAAAGGA	AAGGCTACCCAAATTGTATATCCATTGACATTCAAAAACATTTCAAAAACCCAAAAAAAATCAAATATTCCCAAAAAGACAAAAAAATCAAAATATGTCAXXXXXXXXXXCCCATTAATAAAACACAAATTAGAACTACATCTCATCTTTATCATTAAGTGCCTTGATCCCGTGGATATAGGGTATGTAGGCAATCTAGGATACAAAGGA
>Marker262890	TTAAAATGTAAAAGCATGGTTGAAGAGTTGGTTGGTTGTTCCTTGGATTTTGATTTCTGTGAACATTGTCTATATGGAAAGAAAAATCATGTTTAGTTTTXXXXXXXXXXTAGTGGAGAATTCTATTTAGTAGAGTTTGATAAGTTATGTAAGGAAAATAACATTTTGCAACTTAAGATAACTCTATACACCCTTGGTGGATTCAAAATT	TTAAAATGTAAAAGCATGGTTGAAGAGTTGGTTGGTTGTTCCTTGGATTTTGATTTTTGTGAACATTGTCTATATGGAAAGAAAATTCATGTTTAGTTTTXXXXXXXXXXTAGTGGAGAATTCTATTTAGTAGAGTTTGATAAGTTATGTAAGGAAAATAACATTTTGCAACTTAAGATAACTCTATACACCCTTGGTGGATTCAAAATT
>Marker191462	TAATATGACTCAATGGTCATAATCGAGGGGAGTATATCCCTCTGACTCACTATCAGATACTTATTTAAGATGAGTATATCCTTCTGATTCACTATCAAATXXXXXXXXXXTAACTATGGCATCTCATTCTTTCTTGAATTTCAGGTAGCACTCATTTTTTATAACTGACTTCTGGGCAGTCATCTTGAGTCGCACCATCCTGGCACAAGA	TAATATGACTCAATGGTCATAATCGAGGGGAGTATATCCCTCTGACTCACTATCAGATACTTATTTAAGATGAGTATATCCTTCTGATTCATTATCAAATXXXXXXXXXXTAACTATGGCATCTCATTCTTTCTTGAATTTCAGGTAGCACTCATTTTTTATAACTGACTTCTGGGCAGTCATCTTGAGTCGCACCATCCTGGCACAAGA
>Marker441591	TCTGAATTTGATTTCATTCACCTCCCTGGAGTTGAAAATATTTTTGCAAATTTCATGTCTAGAGAAGGGCACACTTTAAACAAAATTTAGATTTACAAACXXXXXXXXXXCTCTATCCTAAAATTCTTTATTTGTTTGTTGTGATTAATTAATTTTTTGTAAGATATTTATATGAAGTATATTATTTTTCCTTAGAGGTATATTGGGGAG	TATGAATTTGATTTCATTCACCTCCCTGGAGTTGAAAATATTTTTGCAAATTTCATGTCTAGAGAAGGGCACACTTTAAACAAAATTTAGATTTACAAACXXXXXXXXXXCTCTATCCTAAAATTCTTTATTTGTTTGTTGTGATTAATTAATTTTTTGTAAGATATTTATATGAAGTATATTATTTTTCCTTAGAGGTATATTGGGGAG
>Marker510222	TCTAAGATAAGTTTGATACAAACATTTCAATACAATTCATACATTGTTATGATAGGACCAAACCTATTTTGTGTGTATGCTACAAACATTCAATCTTATTXXXXXXXXXXTCTACCACACAATGATACTGATCTCTTCTCCAAACATCACTATATTCATTCAACCAGAGGTTTTCTATTGACTAATCCAAACAAAAAAATCCAAGACTTA	TCTAAGATAAGTTTGATACAAACATTTCAATACAATTCATACATTGTTATGATAGGACCAAACCTATTTTGTGTGTATGCTATAAACATTCAATCTTATTXXXXXXXXXXTCTACCACACAATGATACTGATCTCTTCTCCAAACATCACTATATTCATTCAACCAGAGGTTTTCTATTGACTAATCCAAACAAAAAAATCCAAGACTTA
>Marker301557	AAACTACCAAGATTCACTTTCTTGCAGAGATTCTTCAACTGCTTTAAATAGAAGGATGAGGAGGAGACCCCTTATGAAACCGATGAATCAGAACAGCAGCXXXXXXXXXXAGATAAAAGCAGCAGTTGTCCGAAGTTAGAGCTTGAAATGGAGGATATTTGTAATAAGGAGCCATGAGACCCAACACACAGGAACTTGGGAAAGGGGTTA	AAACTACCAAGATTCACTTTCTTGCAGAGATTCTTCAACTGCTTTAAATAGAAGGATGAGGAGGAGACCCCTTATGAAACCGATGAATCAGAACAGCAGCXXXXXXXXXXAGATAAAAGCAGCAGTTGTCCGAAGTTAGAGCTTGAAATGGGGGATATTTGTAATAAGGAGCCATGAGACCCAACACACAGGAACTTGGGAAAGGGGTTA
>Marker213960	TATCCCTGCTAAAAGCTTCTTGTTATCGCTGCTAAAAGCTCCTTGGTGGAAGCAGAACAAGATAATAAGAAGCATTTCACAAAACTCTATTTTAGGCAGAXXXXXXXXXXATTTTTAAATCTGTTACATTCAATAGTTTACAGAACCATTAAGCAAATGGAACAAGATATGCAAACTGCGTATGAGGTTACACACCACAAAAAAATTGCA	TATCCCTGCTAAAAGCTTCTTGTTATCGCTGCTAAAAGCTCCTTGGTGGAAGCAGAACAAGATAATAAGAAGCATTTCACAAAACTCTATTTTAGGCAGAXXXXXXXXXXATTTTTAAATCTGTTACATTCAATAGTTTATAGAACCATTAAGCAAATGGAACAAGATATGCAAACTGCGTATGAGGTTACACACCACAAAAAAATTGCA
>Marker520548	AGACTCCCCTTAACTATTCTATTGTCTTTTGTCTTCACCAAATAATCCTCTTCCTCTAGAGTTGTTCTATTGCTTCCTAGCCAATTTCTCTTCAACTCTCXXXXXXXXXXTTGCTACCATCCAATCCCATGTCCGAATCTTCTCTTTTCCTTTCCTTTGCTAATCCATTTGCACATGATCCCACCACAAGGATGGATGACCCTTCAGCTT	AGACTCCCCTTAACTATTCTATTGTCTTTTGTCTTCACCAAATAATCCTCTTCCTCTAGAGTTGTTCTATTGCTTCCTAGCCAATTTCTCTTCAACTCTCXXXXXXXXXXTTGCTACCATCCAATCCCATGTCCGAATCTTCTCTTTTCCTTTCCTTTGTTAATCCATTTGCACATGATCCCACCACAAGGATGGATGACCCTTCAGCTT
>Marker112450	AGCATGGAATCCTATCTAACCTCATTAGGGTTTGATGTATGGAAATCTATTGTGGATGGTTATACTACTCATACAACTCCTCCAATAGACCAGACTAGTAXXXXXXXXXXAGTGGATGATATTGTCAATGTTATCAAAGGACTTGCTGAAGAAATGAAAGAATCGGTAATTGTGAAGAAGGTTTTAAGATCCCTTTGTTGAACACACAGA	AGCATGGAATCCTATCTAACCTCATTAGGGTTTGATGTATGGAAATCTATTGTGGATGGTTATACTACTCATACAACTCCTCCAATAGACTAGACTAGTAXXXXXXXXXXAGTGGATGATATTGTCAATGTTATCAAAGGACTTGCTGAAGAAATGAAAGAATCGGTAATTGTGAAGAAGGTTTTAAGATCCCTTTGTTGAACACACAGA
>Marker311721	TCCATTTGACATCAAGCATAGGGGAGGTCTTGTTTTGTGATGGCAAATATGTCATTGTAGATTCCAATAGTGAAGGCTCGATCTGTCATAGGTTGTGGAGXXXXXXXXXXAATCTACTAAGTGACCAATAACAATAAGATATGTCGATTCCATCAACCTATGTTGTCTTCTCGGATTCTGCCCTATCTTCAAAGATTCTTCCTTCATCAC	TCCATTTGACATCAAAGCATAGGGGAGGTCTTGTTTTGTGATGGCAAATATGTCATTGTAGATTCCAATAGTGAAGGCTCGATCTGTCATAGGTTGTGGAXXXXXXXXXXAATCTACTAAGTGACCAATAACAATAAGATATGTCGATTCCATCAACCTATGTTGTCTTCTCGGATTCTGCCCTGTCTTCAAAGATTCTTCCTTCATCAC
>Marker293412	ACGAGTTTATCTCATTACGTTCATAACAACCTTTTCATCTTGGTGTTGAACAGATTCCTTTGATTTCATTGGGAGTAGTGTTGAAATCCCCATCCAATGGXXXXXXXXXXAAATTGACAACATGGGATTTATAAGTATTTGCAAGAACAAAATACGTGTAGATAATGTTCGCCTACTTGAGAATGTGACTGCTGCAGCCTATTCAAAGAC	ACGAGTTTATCTCATTACGTTCATAACAACCTTTTCATCTTGGTGTTGAACAGATTCCTTTGATTTCATTGGGAGTAGTGTTGAAATCCCCATCCAATGGXXXXXXXXXXAAATTGACAACATGGGATTCATAAGTATTTGCAAGAACAAAATACGTGTAGATAATGTTCGCCTACTTGAGAATGTGACTGCTGCAGCCTATTCAAAGAC
>Marker92881	TTGTGCCTAGTCAACGATGCATTTATTGCTAGGTAGTTGACCTTAGAGCTATGTGGGACACATGTCAAACCCTCAGTCAACACACCTCGTAGACACTATAXXXXXXXXXXCCTCCTTTTCTACATTTAATGCCCCTATTTTCTTGATATTGACAGTTTTCAAACATTTTGTTGTCCAATCCTCATTTTGAGAATTTGAGAGCCCATATCT	TTGTGCCTAGTCAACGATGCATTTATTGCTAGGTAGTTGACCTTAGAGCTATGTGGGACACATGTCAAACCCTTAGTCAACACACCTCGTAGACACTATAXXXXXXXXXXCCTCCTTTTCTACATTTAATGCCCCTATTTTCTTGATATTGACAGTTTTCAAACATTTTGTTGTCCAATCCTCATTTTGAGAATTTGAGAGCCCATATCT
>Marker183219	TCATTTGCATTTGCTTTTTTTTATTCTGTTGTATTGCCTGTTTTTCTCATTTCATTTAATTCCATTAGTTGTTCTCACCTTTTTTCCATCAGTTATGGGAXXXXXXXXXXTGAGATTAGCACTATGAGATCATAATGCCATAAGACTTACAAAATCTTTTAAACTCATCTGATCTAAAACACATTTCATTGTCAGTTATAAGCCTCAAAA	TCATTTGAATTTGCTTTTTTTTATTCTGTTGTATTGCCTGTTTTTCTCATTTCATTTAATTCCATTAGTTGTTCTCACCTTTTTTCCATCAGTTATGGGAXXXXXXXXXXTGAGATTAGCACTATGAGATCATAATGCCATAAGACTTACAAAATCTTTTAAACTCATCTGATCTAAAACACATTTCATTGTCAGTTATAAGCCTCAAAA
>Marker353198	AAGACTTAGTTTATTACATGTTGAATAATGAGTGTCCTAGACATCTAAATTCAACTCAAGGAAGAGCCTTGTGGGCCTTAAAAGTGTAAATTTTATGATAXXXXXXXXXXTGATTTAAGCTCACCCTTTTCATAATGGGATTGGAATTTTGGTGCCATTAAATTGAATGCTTCAATTGGCCACAAGTTTATTTTGATAGCAACATACTAT	AAGACTTAGTTTATTACATGCTGAATAATGAGTGTCCTAGACATCTAAATTCAACTCAAGGAAGAGCCTTGTGGGCCTTAAAAGTGTAAATTTTATGATAXXXXXXXXXXTGATTTAAGCTCACCCTTTTCATAATGGGATTGGAATTTTGGTGCCATTAAATTGAATGCTTCAATTGGCCACAAGTTTATTTTGATAGCAACATACTAT
>Marker243833	CATAAGGTGGCTGATTGTATCTATTATCATTCTAGTTTCAATTCCACATATGTTGATTGTCTCTTTGATAGTAACTATTATTTTAGGGATGATCCATAATXXXXXXXXXXCTTCCTTATAGGACCTATACGATAATTTTTGTATTTCTCTTATATCCCTATTGACGGTGTGCAAGAAAAGGTCACATTGTTCTTTGTGGTCCATATTAGG	CATAAGGTGGCTGATTGTATCTATTATCATTCTAGTTTCAATTCCACATATGTTGATTGTCTCTTTGATAGTAACTATTATTTTAGGGATGATCCATAATXXXXXXXXXXCTTCCTTATAGGACCTATACAATAATTTTTGTATTTCTCTTATATCCCTATTGACGGTGTGCAAGAAAAGGTCACATAGTTCTTTGTGGTCCATATTAGG
>Marker50043	CTGCTCTCAATATCTTATGCATTGTAGCTAAATGGGAACCATGAGCCATTCCATACTTATCATGTAATTCTGACAATACCTTATCTACTTCAACTCTGTTXXXXXXXXXXTGGGATAATTTCTATATCAAACTCTTGTAATGTTGTAAGACATTTAGCTCTTTTCTCTCCAGGTTCATTCTGCATCAGCAGCATCTTCACGGCTGCATTT	CTGCTCTCAATATCTTATGCATTGTAGCTAAATGGGAACCATGAGCCATTCCATACTTATCATGTAATTCTGACAATACCTTATCTACTTCAACTCTGTTXXXXXXXXXXTGGGATAATTTCCATATCAAACTCTTGTAATGTTGTAAGGCATTTAGCTCTTTTCTCTCCAGGTTCATTCTGCATCAGTAGCATCTTCACGGCTGCATTT
>Marker552180	TGAATCTCTTTGCTGCTCTATGCTTAGCCTGTGTAAACTGCCCGGGTTCAAACTGCTACTTGAATCGCTTGCACTGGGCATCACTAACCACAGTGGGTTAXXXXXXXXXXAGTCACCAAGATATGCCAGAACAGCAATGAGAACTTCATTTTCAGAATCAGGGTATGTGGGTAAAGCGTAATAAATGGCTGATATTGATATTGAGCCCCT	TGAATCTCTTTGCTGCTCTATGCTTAGCCTGTGTAAACTGCCCGGGTTCAAACTGCTACTTGAATCGCTTGCACTGGGCATCACTAACCACAATGGGTTAXXXXXXXXXXAGTCACCAAGATATGCCAGAACAGCAATGAGAACTTCATTTTCAGAATCAGGGTATGTGGGTAAAGCGTAATAAATGGCTGATATTGATATTGAGCCCCT
>Marker107937	ATTCTTATAAAGACTGTAGTTTTGTTTACATTCAAATGCAGTTTTTTTTTTCCGAGTTGCTAGCATAATGAAATCCGTAATTGGTGAGTTGTTTGAGAGTXXXXXXXXXXCTTTGACGACCTTTGGAAACAAAGACTCAAGTTTAACTTACAAATGAGAAATGGCTAGGTTTTGTCTTACAACTTGACATGATATGTAATATTTGGTATG	ATTCTTATAAAGACTGTAGTTTTGTTTACATTCAAATGCAGTTTTTTTTTTCCGAGTTGCTAGCATAATGAAATCCGTAATTGGTGAGTTGTTTGAGAGTXXXXXXXXXXCTTTGACGACCTTTGGAAACAAAGACTCAAGTTTAACTTAGAAATGAGAAATGGCTAGGTTTTGTCTTACAACTTGACATGATATGTAATATTTGGTATG
>Marker266274	CATTCTCCTGATATTGTCTTTCTTCAGGAAACTAAGTTAATTGTGGATGATTTGTTAGATAGAGCTCCTAGTATCTGAACTTGTGAACTTGTGGTTTGTGXXXXXXXXXXGGAGGAAAAAAGAGGTGGCATTGTTAGGCTTGACCCTTCTGCTTATCTCTTAAGGGATAACATAGATCTTTTGCATTTAATTGATGTGAATTTAAGTAAT	CATTCTCCTGATATTGTCTTTCTTCAGGAAACTAAGTTAACTGTGGATGATTTGTTAGATAGAGCTCCTAGTATCTGAACTTGTGAACTTGTGGTTTGTGXXXXXXXXXXGGAGGAAAAAAGAGGTGGCATTGTTAGGCTTGACCCTTCTGCTTATCTCTTAAGGGATAACATAGATCTTTTGCATTTAATTGATGTGAATTTGAGTAAT																							CATTCTCCTGATATTGTCTTTCTTCAGGAAACTAAGTTAACTGTGGATGATTTGTTAGATAGAGCTCCTAGTATCTGAACTTGTGAACTTGTGGTTTGTGXXXXXXXXXXGGAGGAAAAAAGAGGTGGCATTGTTAGGCTTGACCCTTCTGCTTATCTCTTAAGGGATAACATAGATCTTTTGCATTTAATTGATGTGAATTTAAGTAAT
>Marker540915	CAAGGAGGCACCCTGTGCACTGGCTGTAACCAAGGGAAACCTTGGTCCCTAACAGCATTAAAGAATAATTTTTAAGTTTAAGAGGATAAAAAACCAAAAAXXXXXXXXXXTCCTTCAAAACAGACACTTTCTGCCACTTTGGAGACATGTTATGATGCTAGAGTAGATTCTGGGATGAGAAGGTTCGGCAAATCAACGAATATAAAAACA	CAAGGAGGCACCCTGTGCACTGGCTGTAACCAAGGGAAACCTTGGTCCCTAACAGCATTAAAAAATAATTTTTAAGTTTAAGAGGTCAAAAAACCAAAAAXXXXXXXXXXCCCTTCAAAACAGACACTTTCTGCCACTTTGGAGACATGTTATGATGCTAGAGTAGATTCTGGGATGAGAAGGTTCGGCAAATCAACGAATATAAAAACA
>Marker203505	ATGGATGCTTTTGGTAGTAAGTTTACAAAGCCTTCACTTGAGGAGTTTGTTGCACAACTCACAAGAGAACAAGCCAAGATACTACACATTGGCACATTGAXXXXXXXXXXCTTCAAAAGCATAATATTGAGTATCCTTCATCAACATTAGTTTTACCCAATTCTTCTTCTTCAACATTGTTATATCAGAAATTGTCCTCCTATATGGAAT	ATGGATGCTTTTGGTAGTAAGTTTACAAAGCCTTCACTTGAGGAGTTTGTTGCACAACTCACAAGAGAACAAGCCAAGATACTACACATTGGCACATTGAXXXXXXXXXXCTTCAAAAGCATAATATTGAGTATCCTTCATCAACATTAGTTTTACCCAATTCTTCTTCTTCAACATTGTTATATCAAAAATTGTCCTCCTGTATGGAAT
>Marker186935	TCATCAGGCTTCATTTGCCAGGGCCCACTTTTCACCTACCTAACCTCTCCCCTCTTCCTAGTCTATATAAACTCACTAACTAGCTTGTATTTTGCATCTTXXXXXXXXXXCGTTTATGGATAACTGGTTGTCTTTTACAATGTTTGTGATCATGCTTAAATATCTTTCTTGTTGACCATTAAGCAATTTGCTAATACTCTATGAGAGATT	TCATCAGGCTTCATTTGCCAAGGCCCACTTTTCACCTACCTAACCTCTCCCCTCTTCCTAGTCTATATAAACTCACTAACTAGCTTGTATTTTGCATCTTXXXXXXXXXXCGTTTATGGATAACTGGTTGTCTTTTACAATGTTTGTGATCATGCTTAAATATCTTTCTTGTTGACCATTAAGCAATTTGCTAATACTCTGTGAGAGATT
>Marker245861	TGTTATAATACATCAATAGCACATAATATACAAAGTGTCCTTAATCTTTTTGATTTTATAGTTCAATATCCTTCATAATAGAGTTTCAACTAGGTGTTGTXXXXXXXXXXTAGGAACTATGTATTATATTGGAATGTTGCATCCAACCCATATATTAAATGAAATGGACATTATTTTATTAGCCTTTTATATGTTGTGTGGTAGGCCCAT	TGTTATAATACATCAATAGCACATAATATACAAAGTGTCCTTAATCTTTTTGATTTTATAGTTCAATATCCTTCATAATAGAGTTTCAACTAGGTGTTGTXXXXXXXXXXTAGGACCTATGTATTATATTGGAATGTTGCATCCAACCCATATATTAAATGAAATGGACATTATTTTATTAGCCTTTTATATGTTGTGTGGTAGGCCCAT
>Marker329826	TAAATATATGAGAGAAATATCGATCATGATACTTAGAGCACACTTCAATTCTGAAGGGAAATAAAAGCATTGAACCTACATCATCATTTAGACCATCTCCXXXXXXXXXXCATAAGGCACAATGTTTATTTGTAGACATTTTTGTGTCAGTTTAGACTTTGAGATATTCATCAAACCAAGGTAGACAATTCACAATGGTGAATTATTCCA	TAAATATATGAGAGAAATATCGATCATGATACTTAGAGCACACTTCAATTCTGAAGGGAAATAAAAGCATTGAACCTACATCATCATTTAGACCATCTCCXXXXXXXXXXCATAAGGCACAATGTTGATTTGTAGACATTTTTGTGTCAGTTTAGACTTTGAGATATTCATCAAACCAAGGTAAACAATTCACAATGGTGAATTATTCCA
>Marker95513	TTCAAGAATAACTAGCCTTTGAAAAGGCATAGGACTGAATGACAACCTCCTACTTGCCTTGGAAAGGCTTACAAATGAGAGGAAAACACAGGACTGCCCCXXXXXXXXXXATAGATCACCTAGGACTCAAGTATATTCTTACTCAACCCAATATTAATGCTTGTCAAAGGAGATGGCTTGAGTTTCTCAGTGATTATGATTTTGGGATTG	TTCAAGAATAACTAGCCTTTGAAAAGGCATAGGACTGAATGACAACCTCCTACTTGCCTTGGAAAGGCTTACAAATGAGAGGAAAACACAGGACTGCCCCXXXXXXXXXXATAGATCACCTAGGACTCAAGTATATTCTTACTCAACCCAATATTAATGCTTGTCAAAGGAGATGGCTTGAGTTTCTCGGTGATTATGATTTTGGGATTG
>Marker142669	CCTTAATGATTCTGATAACCTACCATATGATGATGATACAACAAAGAAGCTTGCCTATTTGGAATGTCTTGAACGTTGTGATGACATTGAGGCTTCTCCTXXXXXXXXXXCTTGCTTCTATAGAGTTCAGTGTTGCTACATCCATGGCTTCTAATGGTTTAGTGTTGTAGGACATTCATATTAGTCTTCCAGATATAGCTTCTTGGGATG	CCTTAATGATTCTGATAACCTACCATATGATGATGATACAACAAAGAAGCTTGCTTATTTGGAATGTCTTGAACGTTGTGATGACATTGAGGCTTCTCCTXXXXXXXXXXCTTGCTTCTATAGAGTTCAGTGTTGCTACATCCATGGCTTCTAATGGTTTAGTGTTGCAGGACATTCATATTAGTCTTCCAGATATAGCTTCTTGGGATG
>Marker357691	AAGAGAAAACACAACTTCCCGAATCACCTCCATGCTGAAAGGCTTCGTCAGATCCTTGTTTTGCTCTTCCTTAATAATTGACAAGATGTTACAAAGCAATXXXXXXXXXXTGATTTCCTCCATCCTAAGATATGAGTTTAATTATTCCTACAATTTGCTCACCAAATTCATGTTCTCTACTAAGTCCCCACTTTTGGTGATAGCTTCTTC	AAGAGAAAACACAACTTCCCGAATCACCTCCATGCTGAAAGGCTTCGTCAAATCCTTGTTTTGCTCTTCCTTAATAATTGACAAGATGTTACAAAGCAATXXXXXXXXXXTGATTTCCTCCATCCTAAGATATGAGTTTAATTATTCCTACAATTTGCTCACCAAATTCATGTTCTCTACTAAGTCCCCACTTTTGGTGATAGCTTCTTC
>Marker253496	AGCCTTTGTAAAGAAGCATAGACCTTTAAAATTTAGGGCAGCATATCAAAGACACAACAAAGATATATGATAGGCAGCCACAATATTGGGGCTTAGCCAAXXXXXXXXXXCAGCCTAACTCAATCCAAAGGTGTCAACCATCACATAGAGGGCGTTGCACATCAAACACAAAGTCTGTAGTCAAAATGAAGATGGTGCGGTTAGAATGAA	AGCCTTTGTAAAGAAGCATAGACCTTTAAAATTTAGGGCAGCATATCAAAGACACAACAAAGATATATGATAGGCAGCCACAATATTGGGGCTTAGCCAAXXXXXXXXXXCAGCCTAACTCAATCCAAAGGTGTCGACCATCACATAGAGGGCGTTGCACATCAAACACAAAGTCTGTAGTCAAAATGAAGATGGTGCGGTTAGAATGAA
>Marker423500	TTCTTCAAGCAGCCAATCTTTTTAAAACATAAATTGCACTATAACAGCAAGAGGTGACAGTCTATATAAATTTAGAAAAATATATAGAGATATTGGCTATXXXXXXXXXXCAACTTTTGACTAAGGTTGAGCAGCAATGACTTATTATATGAGGTGATTATCCATGTGGAGAAGTCATGTTTGATATAATGTGCAGTATGCTAATGCCAT	TTCTTCAAGCAGCCAATCTTTTTAAAACATAAATTGCACTATAACAGCAAGAGGTGACAGTCTATATAAATTTAGAAAAATATATAGAGATATTGGCTATXXXXXXXXXXCAACTTTTGACTAAGGTTGAGCAGCAATGACTTATTATATGAGGTGATTATCCATGTGCAGAAGTCATGTTTGATATAATGTGCATTATGCTAATGCCAT
>Marker372786	TTCATGATTATCCTTGGCCTATATTTTTTACACCTAACATTGAAGATGTCTTACTTGTTTGTCACATATTGCATTTATGTCACTTATCACAATACACAATXXXXXXXXXXATACCAAACCACTTTCTATAGATGCAAAAAGAATTCCAACCCTACTCTCTTTTCCCTTTCTCTCTCATTTTCATAGACAATTAAATATTTTCCAATTGTG	TTCATGATTATCCTTGGCCTATATTTTTTACACCTAACATTGAAGATGTCTTACTTGTTTGTCACATATTGCATTTATGTCACTTATCACAATACACAATXXXXXXXXXXATACCAAACCACTTTCTATAGATGCAAAAAGAATTCCAACCCTACTCTCTCTTCCCTTTCTCTCTCATTTTCATAGACAATTAAATATTTTCCAATTGTG
>Marker345429	CGACCCATATGGTCTAAGTTAGTTTCGACTCGATAGTTGTTGATTTGTCATCACAGAAATGGTCTTCAGACATTAGTCCTTGTTTGATATGAATATAGTGXXXXXXXXXXTAACATGAAGTATAAGTATAATTTATACTTAATAGACATGGGTTCTTAAGAGAACGTGGTAGTCTTGCAATTAAATGCAAAACCACTTCACTTAATTTGT	CGACCCATATGGTCTAAGTTAGTTTCGACTCGATAGTTGTTGATTTGTCATCATAGAAATGGTCTTCAGACATTAGTCCTTGTTTGATATGAATATAGTGXXXXXXXXXXTAACATGAAGTATAAGTATAATTTATACTTAATAGACATGGGTTCTTAAGAGAACGTGGTAGTCTTGCAATTAAATGCAAAACCACTTCACTTAATTTGT
>Marker89580	GAGTCGATTCCTAGCGGCTGGGAGACTTCCAAATGGCTGGGAGAGGATAGCTAGCATAACAAACTTCTAACTGACTTCAACATAAACCTAGACTGACTTAXXXXXXXXXXCTACCAGTCGAATACAAGGCTAATCCACCCCCGAGCTTCTTCTAAGATTCAATGACTATGTTATAAAATAATTTTTTGAGATTATCCTCACATAATCCTA	GAGTCGATTCCTAGCGGCTGGGAGACTTCCAAATGGCTGGGAGAGGATAGCTAGCATAACAAACTTCTAACTGACTTGCACATAAACCTAGACTGACTTAXXXXXXXXXXCTACCAGTCGAATACAAGGCTAATCCACCCCCGAGCTTCTTCTAAGATTCAATGACTATGTTATAAAATAATTTTTTGAGATTATCCTCACATAATCCTA
>Marker162097	TTGTTTTTTATGATACTATAATAATTTAGCATTAATTGCTAATGGATAATATAATTCAAAAAATAAAGTGTAACTAGTTGATGTATGGGGTCATTGTTGAXXXXXXXXXXTGCCAAGTGAGAAATTGATTTGATGTATGGGACCCTCTTGGTAGATGCCTAGTAGGAGCTTGGTTCCTTTCCCATTTATCTTATACATTGTCCTATAAGG	TTGTTTTTTATGATACTATAATAATTTAGCATTGATTGCTAATGGATAATATAATTCAAAAAATAAAGTGTAACTAGTTGATGTATGGGGTCATTGTTGAXXXXXXXXXXTGCCAAGTGAGAAATTGATTTGATGTATGGGACCCTCTTGGTAGATGCCTAGTAGGAGCTTGGTTCCTTTCCCATTTATCTTATACATTGTCCTATAAGG
>Marker126270	TACTCTTCACTATAGCATGCTGTGATATAGGTTATAAGGCCATGGCTTTGTAACTATAACAACAAAGCTTATAAAGGGTTTTAGAACCCTTCCTGATAATXXXXXXXXXXCCTTTTGTAGCATTATAACATGGATGTTATAACTACTCCTATAACATGTCATTATGGGCATTTACTTAGCTCTTTATGCCCTTTTATTATGGCATATGCC	TACTCTTCACTATAGCATGCTGTGATATAGGTTATAAGGGCATGGCTTTGTAACTATAACAACAAAGCTTATAAAGGGTTTTAGAACCCTTCCTGATAATXXXXXXXXXXCCTTTTGTAGCATTATAACATGGATGTTATAACTACTCCTATAACATGTCATTATGGGCATTTACTTAGCTCTTTATGCCCTTTTATTATGGCATATGCC																							TACTCTTCACTATAGCATGCTGTGATATAGGTTATAAGGCCATGGCTTTGTAACTATAACAACAAAGCTTATAAAGGGTTTTAGAATCCTTCCTGATAATXXXXXXXXXXCCTTTTGTAGCATTATAACATGGATGTTATAACTACTCCTATAACATGTCATTATGGGCATTTACTTAGCTCTTTATGCCCTTTTATTATGGCATATGCC
>Marker111823	TCGTTGGTTGATGGTATAAAGGTGTTTTATAGCATGATGTTTGAACCATGTGTTATGGAAGTGACCTAATTGAAATGTATGATCTCGTGCAACCTCGTGTXXXXXXXXXXATCCATGTGTCCATTTTCGTTCATGGGTTTTGGGGGCTTTTTAAATGATGATTTTTGAGCTTTTTATTGTTAATTTCATGTGTTTAAGGGTCCTAGGTCA	TCGTTGGTTGATGGTATAAAGGTGTTTTATAGCATAATGTTTGAACCATGTGTTATGGAAGTGACCTAATTGAAATGTATGATCTTGTGCAACCTCGTGTXXXXXXXXXXATCCATGTGTCCATTTTCGTTCATGGGTTTTGGGGGCTTTTTAAATGATGATTTTTGAGCTTTTTATTGTTAATTTCATGTGTTTAAGGGTCCTAGGTCA																							TCGTTGGTTGATGGTATAAAGGTGTTTTATAGCATGATGTTTGAACCATGTGTTATGGAAGTGACCTAATTGAAATGTATGATCTTGTGCAACCTCGTGTXXXXXXXXXXATCCATGTGTCCATTTTCGTTCATGGGTTTTGGGGGCTTTTTAAATGATGATTTTTGAGCTTTTTATTGTTAATTTCATGTGTTTAAGGGTCCTAGGTCA
>Marker377750	GTATGACTTCCTATCCTGTCAGCCCAAAACACAATCCAATATGATTTGCAGAGAGAACCAAAGCATATAGAACATTTATATAGGTTAGAACAACCTATAAXXXXXXXXXXATCATTATACTATCAGTACAGAGTCTGATCCTTAGTCAACTCTTCCTTTGACTCTGGGGGATTTCAAGACTTGAAACTTTGGATTTGGACTCTATGAATA	GTATGACTTCCTATCCTGTCAGCCCAAAACACAATCCAATATGATTTGCAGAGAGAACCAAAGCATATAGAACATTTATATAGGTTAGAACAACCTATAAXXXXXXXXXXATCATTATACTATCAGTACAGAGTCTGATCCTCTAACAACTCTTCCTTTGACTCTGGGGGATTTCAGGACTTGAAACTTTGGATTTGGACTCTATGAATA
>Marker259018	GTGAAATTTGTAGGTAAAGCGTTTACCTTGAAAGATAGATACATTCATTTGGAATTCAAATACATTTAGGTTAGTAATAGGAGAATCCTGTTGGCATGCAXXXXXXXXXXTTATCACTACTTTGTTTGCATTTTGATTGAAGCTATGATATGTAATTAGTGTGGATAGTCCACTACATAATTTATAAACATGTATCTTATTCAACCTTAA	GTGAAATTTGTAGGTAAAGCGTTTACCTTGAAAGATAGATACATTCATTTGGAATTCAAATACATTTAGGTTAGTAATAGGAGAATCCTGTTGGCATGCAXXXXXXXXXXTTATCACTACTTTGTTTGCATTTTGATTGAAGCTATGATATGTAATTAGTGTGGATAGTTCACTACATAATTTATAAACATGTATCTTATTCAACCTTAA
>Marker302168	TTTATTTGAACCCTATTGACACATGACAAGCCATATATCTAAGAAAAACCTTCTTTCAAAGGTGTTTAATGATTTTTTCCTCCTAAGATTTTTTTGTTAGXXXXXXXXXXAGATGTAATTCATAATGCATGATTTGTTAAATAGTAAAAGGTTACATTCATTTGTTACTAGCACCCTTGAGAGTTTAACCTTCTAGAGCTTAGAGCCCAT	TTTATTTGAACCAGGTATTGACACATGACAAGCCATATATCTAAGAAAAACCTTCTTTCAAAGGTGTTTAATGATTTTTGCCTCCTAAGAATTTTTTGTTXXXXXXXXXXAGATGTAATTCATAATGCATGATTTGTTAAATAGTAAAAGGTTACATTCATTTGTTACTAGCACCCTTGAGAGTTTAACCTTCTAGAGCTTAGAGCCCAT
>Marker308194	ATTAGTAAGTTGCAATTTAAACATGTTTATTTAGTGTGTTTCACTTTGGAATCTATTTATTGTTTGTGTGGAGCACAACTTTGGCATTCACTTTAATTTGXXXXXXXXXXTGAACTTTGACAATGACTTATATGTGTTTCACTTTGTATGTCAAGTATCATAATATTCCTTAATCATAATGCAATCTATTAACATTGCCATAATTAGTGT	ATTAGTAAGTTGCAATTTAAACATGTTTATTTAGTGTGTTTCACTTTAGAATCTATTTATTGTTTGTGTGGAGCACAACTTTGGCATTCACTTTAATTTGXXXXXXXXXXTGAACTTTGACAATGACTTATACGTGTTTCACTTTGTATGTCAAGTATCATAATATTCCTTAATCATAATGCAATCTATTAACATTGCCATAATTAGTGT
>Marker309145	GTTGGCCGTCAATTCACGCCTGCTTGAAGCTACAGTGGCAGCGCTCGACCGAGATTTCTTAGGCACAGCAGCCCTAACGTCTGTAGACAGAAATCTACTCXXXXXXXXXXATATTTTCTATTTACAGCCATATACACATAAAATATACTGCATATTTTCTACTCAGAAAACCTAACATACACACAATTTAAGGTCTATTTAGTGTGTATT	TTTGGCCGTCAATTCACGCCTGCTTGAAGCTACAGTGGCAGCGCTCGACCGAGATTTCTTAGGCACAGCAGCCCTAACGTCTGTAGACAGAAATCTACTCXXXXXXXXXXATATTTTCTATTTACAGCCATATACACATAAAATATACTGCATATTTTCTACTCAGAAAACCTAACATACACACAATTTAAGGTCTATTTAGTGTGTATT
>Marker236234	TATAATGCATTGGTGGAGAATATACCTTGCTTGAATGTTCCTCTGAAAAAGATGACTATTGAACAATGCATGACTAGAAAAAAATAGGCGGAGAAATCACXXXXXXXXXXCTTCACCAAGGGCTGTTTTTCTTAAAACAAAGGTAACTCTCTAAATAATTGTTGCTGGGTTGGTGTAGTTCACTTGCTTCAGTAAAAGATAAGTGTTTTG	TATAATGCTTTGGTGGAGAATATACCTTGCTTGAATGTTCCTCTGAAAAAGATGACTATTGAACAATGCATGACTAGAAAAAAATAGGCGGAGAAATCACXXXXXXXXXXCTTCACCAAGGGCTGTTTTTCTTAAAACAAAGGTAACTCTCTAAATATTTGTTGCTGGGTTGGTGTAGTTCACTTGCTTCAGTAAAAGATAAGTGTTTTG
>Marker193378	AGAGAATTTCAAAACTCCTAGGTATGTAAGACTGAATAACTCTGAAGACCAGATCATAGGAGATAAAAGCAAAGGTGTTCAAACAAGAAGAAATATTGCTXXXXXXXXXXCTCAAGTAAAAAGAATTGCCTTTGAAGAAACGTTTGCTCTGGTAGCAAGGATTGAAGCAATCAGATCATTTCTTGCCTTTGCTGCCTTTAAAGATTTCAA	AGAGAATTTCAAAACTCCTAGGTATGTAAGACTGAATAACTCTGAAGACCAGATCATAGGAGATAAAAGCAAAGGTGTTCAAACAAGAAGAAATATTGCTXXXXXXXXXXCTCAAGTAAAAAGAATTGCCTTTGAAGAAATGTTTGCTCTGGTAGCAAGGATTGAAGCAATCAGATCATTTCTTGCCTTTGCTGCCTTTAAAGATTTCAA
>Marker379726	TGAATTGTAAACTTGCTTTCGAATATGACTGCATTAATTTTCCAAACAGCTTTGAATGCTGTTGGAAAACATCCTTCATCACACCGAATTTCAATTCCAAXXXXXXXXXXGAAATGCTAGATTGGATCCACTAGATGCTCAAATTGTCAAACATCTTCTAAAAACATTTTCCATTTGTTCATCCATCATAATATGCCAAGATTATATGGG	TGAATTGTAAACTTGCTTTCGAATATGACTGCATTAATTTTCCAAACAGCTTTGAATGCTGTTGGAAAACATCCTTCATCACACCGAATTTCAATTCCAAXXXXXXXXXXGAAATGCTAGATTGGATCCACTAGATGCTCAAATTGTCAAACATTGTCCAAAAACATTTTCCATTTGTTCATCCATCATAATATGCCAAGATTATATGGG
>Marker231827	GTGTGTATTATCTCTGGCTTTCTCTCCAGGAGATAAATAATTGCATGGAAAATACTCTGTTAATTTCATTCTACACTGTGGTTTAAAGGATAGTCATGTAXXXXXXXXXXATCTTATAGGAATCGGTCATTTCCTTGGTATATTTTCATTGAGAACCTTATGTTTTATAACATCCTAAACAAGTTCAAAATATATTTAGATGTTGTAAAG	GTGTGTATTATCTCTGGCTTTCTCTCAAGGAGATAAATAATTGCATGGAAAATACTCTGTTAATTTCATTCTGCACTGTGGTTTAAAGGATAGTCATGTAXXXXXXXXXXATCTTATAGGAATCGGTCATTTCCTTGGTATATTTTCATTGAGAATCTTATGTTTTATAACATCCTAAACAAGTTCAGAATATATTTAGATGTTGTAAAG
>Marker168276	AGAACCATGTCTTGACTAATTATGTTGCTTAAATTTTTTTTTACAACATTCATGCTATATTATGAACTTAGTGTCAAGCTATGTAGACCAACCCTTAATTXXXXXXXXXXATATTTCCTTTGGTCTTAATCCCTATTTAAAATATTCCTAGAAAAGATTTATTGTGTCTTATTAGTGTTAAGGCTCTTGTAAGTAGAGTTCTCTTTATTT	AGAACCATGTCTTGACTAATTATGTTGCTTAAATTTTTTTTTTACAACATTCATGCTATATTATGAACTTAGTGTCAAGCTATGTAGACCAACCCTTAATXXXXXXXXXXATATTTCCTTTGGTCTTAATCCCTATTTAAAATATTCCTAGAAAAGATTTATTGTGTCTTATTAGTGTTAAGGCTCTTGTAAGTAGAGTTCTCTTTATTT
>Marker292546	CTTGATTTTATATGTATGCATGGTTATCTTTTGTTTATCACCTGATGCATGTATTATTTTCTCCTCACATGATGATATCCTTGATAGTTACTGCATGCTTXXXXXXXXXXCTTGGTTGAAGTCCTTTCACACTTTTTTCTTGGTCAAAACCCTTCTACATTTTCCCACTTAGTCGAAGTGATACTACTTTCCACTCATTCAGAATCTTAC	CTTGATTTTATATGTATGCATGGTTATCTTTTGTTTATCACCTGATGCATATTATTTTCTCCTCACATGATGATATCCTTGATAGTTACTGCATGCTTATXXXXXXXXXXCTTGGTTGAAGTCCTTTCACACTTTTTTCTTGGTCAAAGCCCTTCTACATTTTCCCACTTAGTCGAAGAGATACTACTTTCCACTCATTCAGAATCTTAC
>Marker412848	AAGCATCCGAAAAACAACACTGATGAATACTAGGCAATGTCCAATAATGGAAAAGGGCAATCAAGCTTCATACTAAATTTAACCCAGCAAAGAGTTGTATXXXXXXXXXXTATACCCTTGAAGCAATTTATGTTTTATATTAGAATTATTGTAGATAAATTGATTGCATTTTAAGTAGAAAGGGGTGAAATGGACTAATGAGCTGAATTT	AAGCATCCGAAAAACAACACTGATGAATACTAGGCAATGTCCAATAATGGAAAAGGGCAATCAAGCTTCATACTAAATTTAACCCAGCAAAGAGTTGTATXXXXXXXXXXATATATCCTTGAAGCAATTTATGTTTATATTAGAATTATTGTAGATAAATTGATTGCATTTTAAGTAGAAAGGGGTGAAATAGACTAATGAGCTGAATTT
>Marker434841	AATCCCTCCACGCATAACCCATTTTTAGGGACATAGCTTGAGTATCTTAAAGAGCCTCTAGATCTCAACCTTTGTAATGTCACATTGCCACATTCTCTCCXXXXXXXXXXTAAAAATAGGAATTCAAGAATTCCTAGTCAAACAAGAATTTAATGAATCAATTGCACACTTCATCACATGTTGGAGACAAGTCATCTACTCTTCGACTAG	AATCCCTCCACGCATAACCCATTTTTAGGGACATAGCTTGAGTATCTTAAAGAGCCTCTAGATCTCAACCTTTGTAATGTCACATTGCCACATCCTCTCCXXXXXXXXXXTAAAAATAGGAATTCAAGAATTCTTAGTGAAACAAGAATTTAATGAATCAATTGCACACTTCATCACATGTTGGAGACAAGTCATCTACTCTTCGACTAG
>Marker257832	AAGAGACCTTATATATAAAGGCAAGGTAGAGGAGGTGAGATGGTAGGACTGAAAGACTGATTGCCCCTCCAAAGATGTGACACATGTGGACTCACATGAGXXXXXXXXXXTAGTTGTTGGAGTCTTAAACCCCTTATTGGCAATTGTCAATATATTAACCAACCCTTCCCAATATGGGTTGTTTTGCCACATTGAAGGGTAAATTATTGT	AAGAGACCTTATATATAAAGGCAAGGTAGAGGAGGTGAGATGGTAGGACTGAAAGACTGACTGCCCCTCCAAAGATGTGACACATGTGGACTCACATGAGXXXXXXXXXXTAGTTGTTGGAGTCTTAAACCCCTTATTGGCAATTGTCAATATATTAACCAACCCTTCCCAATATGGGTTGTTTTGCCACATTGAAGGGTAAATTATTGT
>Marker319558	TTTGTCTACGAGATACATATTATCTTTATGCAAGGATTGTGTTGCAAACTCTGGGTAGCACATTAACTCAATAGTATTAGTTCTTGTTGGTGATTGGAAAXXXXXXXXXXTCTTGGAAATTCACTAGAGAGACAAGATGAGTGTCAAATATGAAACAATCAAAGAATAGTAAGTTAATTAACTAGCATACAACATAATATGTCAGTATAT	TTTGTCTACGAGATACATATTATCTTTATGCAAGGATTGTGTTGCAAACTTTGGGTAGCACATTAACTCAATAGTATTAGTTCTTGTTGGTGATTGGAAAXXXXXXXXXXTCTTGGAAATTCACTAGAGAGACAAGATGAGTGTCAAATATGAAACAATCAAAGAATAGTAAGTTAATTAACTAGCATACAACATAATATGTCAGTATAT
>Marker553080	AAAGAACATACATAATGATCTACAAACCTATAAACTAAACTGCTACATACTCTCTCTCCACTAATCTCCATAGCTCTCCCAAGTTCTCCACTTCATAAAAXXXXXXXXXXCATATCAATACACAAGCTAGGATGTAAGCCCCTCTAACTGAAGGAAGATCAAACAAAACATTTATTCCCAAAACTAGGGAATATCCCCAAAACCATCCCT	AAAGAACATACATAATGATCTACAAACCTATAAACTAAACTACTACATACTCTCTCTCCACTGATCTCCATAGCTCTCCCAAGTTCTCCACTTCATAAAAXXXXXXXXXXCATATCAATACACAAGCTAGGATGTAAGCCCCTCTAACTGAAGGAAGATCAAACAAAACATCTATTCCCAAAACTAGGGAATATCCCCAAAACCATCCCT
>Marker320470	TTCAAGTGCACACCTTGCATGTTACTGTAATGTCCCCATTTTGAGCCAAGTTATATTTTCTAGTTTGAGTTTATTTCTATACATGGAGAACCGGAAAGTTXXXXXXXXXXTGCCTATTTCAAATGGATCGACTATCATGTGGAGTGCAAAATCATTGAATATTGGTCCCTTGAATTCCAACGCCCATTAGGAGTTCGCTCAAAATAAAAG	TTCAAGTGCATACCTTGCATGTTACTGTAATGTCCCCATTTTGAGCCAAGTTATATTTTCTAGTTTGAGTTTATTTCTATACATGGAGAACCGGAAAGTTXXXXXXXXXXTGCCTATTTCAAATGGATCGACTATCATGTGGAGTGCAAAATCATTGAATATTGGTCCCTTGAATTCCAACGCCCATTAGGAGTTCGCTCAAAATAAAAG
>Marker196979	CCTCACTGAGACCTACAACATGTGAACAGATTTCACATAAATAAGCTAGGCAAGGTAAGGCAATTGTCTCAGGCATAGATAAGGCATAGATATCACAATGXXXXXXXXXXTGACAGGCCCAGATCCAGAATAACTGAAAGATTCAGTAGAAATGGTCAGGACTTGATTTGGGCAGACTATGGCGCCCATTATGTCAAGGTCCGGAAGGTA	CCTCACTGAGACCTACAACATGTGAACAGATTTCACATAAATAGGCTAGGCATGGTAAGGCAATTGTCTCAGGCATAGATAAGGCATAGATATCACAATGXXXXXXXXXXTGACAGGCCCAGATCCAGAATAACTGAAAGATTCAGTAGAAATGGTCAGGACTTGATTTGGGCAGACTATGGCGCCCATTATGTCAAGGTCCGGAAGGTA
>Marker581567	AAGTTACTAACCTTTGTAAGGTTAGGGTTGCTATCAAGAACTAATTTCAACCCATCATCAGTAACCCTCAAACATTCCACTAAACTCAGACACTGCAAATXXXXXXXXXXTATGCCTCTTTCTACTTGGTCACTATTGTTGCCATCAGTAAAGGCCATACCTGGACCGCATAGTGTATGTTCTGCAATGTCTACTTTCTCACACCTTTGA	AAGTTACTAACCTTTGTAAGGTTAGGGTTGCTATCAAGAACTAATTTCAACCCATCATCAGTAACCCTCAAACATTCCACTAAACTCAGACACTGCAAATXXXXXXXXXXTATGCCTTTTTCTACTTGGTCACTATTGTTGGCATCAGTAAAGGCCATACCTGGACCGCATAGTGTATGTTCTGCAATGTCTACTTTCTCACACCTTTGA
>Marker155311	AAATGGAATTTCTAATAGAAAAAGTAGAAATACTAGCTGGAAAGGTTGATTTTAGTATGAGTTCATTCAAATGCCTCTCAGAGTAGGCTGCAAACAATCCXXXXXXXXXXCTTTTACCATAAAGAAATAAGTCAAGATTTCTAGAGAATATCAGATAAAGATATATGTTCATGTGCCAACCAAGTTCCATGTGTAGAAACAATAAAGAGG	AAATGGACTTTCTAATAGAAAAAGTAGAAATACTAGCTGGAAAGGTTGATTTTAGTATGAGTTCATTCAAATGCCTCTCAGAGTAGGCTGCAAACAATCCXXXXXXXXXXCTTTTACCATAAAGAAATAAGTCAAGATTTCTAGAGAATATCAGATAAAGATATATGTTCATGTGCCAACCAAGGTCCATGTGTAGAAACAATAAAGAGG																							AAATGGACTTTCTAATAGAAAAAGTAGAAATACTAGCTGGAAAGGTTGATTTTAGTATGAGTTCATTCAAATGCCTCTCAGAGTAGGCTGCAAACAATCCXXXXXXXXXXCTTTTACCATAAAGAAATAAGTCAAGATTTCTAGAGAATATCAGATAAAGATATATGTTCATGTGCCAACCAAGTTCCATGTGTAGAAACAATAAAGAGG
>Marker390030	AGTCATTTTATCATGGGTGCATCACCTGCTAGGTTCTTTTCATCTTAGTTTCAATTATTCTATCCTTTTTCCTACAAAAGCAGCAATCTTTTAGGATGTCXXXXXXXXXXGGTGGTAAATAGGTAGTAGATATAGTAGGGCCTATGAAGGGTAATTAGGGTAATGACTATGAGGTTATAGGTTATAAAAGAAGGGGTTGTGAAGTGCCAA	AGTCATTTTATCATGGGTGCATCACCTGCTAGGTTCTTTTCATCTTAGTTTCAATTATTCTATCCTTTTTCCTACAAAAGCAGCAATCTTTTAGGATGTCXXXXXXXXXXGGTGGTAAATAGGTAGTAGATATAGTAGGGCCTATGAAGGGTAATTAGGGTAATGACTATGAGGTTATAGGTTATAAAAGTAGGGGTTGTGAAGTGCCAA
>Marker242231	TTTGAAAAAATGTCAAAATCTAATATTACATTCATTTGGAGACATATATCATGTCTACTTCTTTGGAAAAATTGTTTGCATACATCATAGACATGGATCAXXXXXXXXXXTGAAGCCTTGGATGATTTTATGGGAAATTCTACTATGGCACCTATTGATAAAACATGTGATGATAACTTTGGTTTACCTTATGATCCCTCTCCAAAGGTT	TTTGGAAAAATGTCAAAATCTAATTTTACATTCATTTGGAGACATATATCATGTCTACTTCTTTGGAAAAATTGTTTGCATACATCATAGACATGGATCAXXXXXXXXXXTGAAGCCTTGGATGATTTTATGGGAAATTCTACTATGGCACCTATTGATAAAACATGTGATGATAACTTTGGTTTACCTTATGATCCCTCTCCAAAGGTT
>Marker186193	AAGATAGGAGGTGTAGCTAGATATTCTTTGAGCTGATCAAATGCTACTTGACACTTATTGTCCCATCAAAATGAGACATCCTTTCAGAGCAAGTGTTGAGXXXXXXXXXXTATTTTGCTAGTATGTCATCCACATAGTCCTCTATGTCATTGCTCTTTGATAAGTTGCCCCTACATTCTTTAGACCAAACGGCATGATGCACCAACAATA	AAGATAGGAGGTGTAGCTAGATATTCTTTGAGCTGATCAAATGCTGCTTGACACTTATTGTCCCATCAAAATGAGACATCCTTTCAGAGCAAGTGTTGAGXXXXXXXXXXTATTTTGCTTGTATGTCATCCACATAGTCCTCTATGTCATTGCTCTTTGATAAGTTGCCCCTACATTCTTTAGACCAAACGGCATGATGCACCAACAATA
>Marker279655	ATATACCTTTACTATCTTGTTTGTATCTCAATATGGGATCAATTAGATTTATTTTTCTTCTAAACTTGATCAAAAAGAACTTTTCATTACCTTTCCAATCXXXXXXXXXXACATATGATGCAAGAAGAGATTTCAAGAGGATATAAACTCACCATTTCTCACACATGCTTTGAAGAAAAAAATTATTGATTTAGGCCATATGACTCTACA	ATATACATTTACTATCTTGTTTGTATCTCAATATGGGATCAATTAGATTTATTTTTCTCCTAAACTTGATCAAAAATAACTTTTCATTACCTTTCCAATCXXXXXXXXXXACATATGATGCAAGAAGAGATTTCAAGAGGATATAAACCCACCATTTCTCACACATGCTTTGAAGAAAAAAATTATTGATTTAGGCCAGATGACTCTACA
>Marker219682	ATGTATCTATAGGGTGCATAATTGATTGACATTACATCACAACAATACATCCTTGGGCTATGCAATAATTTTACAATAAATAACAATAAAATATACAATTXXXXXXXXXXCTATTATAAATAAAGCAACTAAACTAGATGCTTACACAAAAGAAACAAATTGATTTAATGCTAGAAAATAAGTAACTGTATATGGGATTTAGAAAAATGA	ATGTATCCATAGGGTGCATAATTGATTGACATTACATCACAACAATACATACTTGGGCTATGCCATAATTTTGCAATAAATAATAATAAAATATACAATTXXXXXXXXXXCTATTATAAATAAAGCAACTAAACTAGATGCTTACACAAAAGAAACAAATTGATTTAATGCTAGAAAATAAGTAACTGTATATGGGATTTAGAAAAATGA
>Marker135520	TAAGAAAACAATATCATCATTTTCCAACAAAAAATTCCCTAAAGTATTTATTAACTATACAAACCAAGAACCTCATTCCACATAAAAGCATGGGTCTACAXXXXXXXXXXATGTGGGTAGATTACAATATAATAAATAAATTTCTGTGATCATAATTATAAATTTACATACATGGACTCAAACGTTTTGAATTATACATTTTCATTAAAG	TAAGAAAACAATATCATCATTTTCCAACAAAAAATTCCCTAAAGTATTTATTAACTATACAAACCAAGAACCTCATTCCACATAAAAGCATGGGTCTACAXXXXXXXXXXATGTGGGTAGATTACAATATAATAAATAAATTTCTGTGATCATAATTATAAATTTACATACATGGACTCAAACATTTTGAATTATACATTTTCATTAAAG
>Marker369455	ACTATGAACACAATGACATGTTTAAAACTGAACATGTTTATGCCCAAGTAGATCAATTCCTATTCCAAAACATAGATGATATCCTTATGCACCTCGTAGAXXXXXXXXXXCTTAGCCTCTCATATAGGCCCTTCATCACCCAAACATTCATAGCTCCATCAATAATCCAATCAACAACCCAACTTTATCCTACCATCATCGCCACTTCAA	ACTATGAACACAATGACATGTTTAAAACTGAACATGTTTATGCCCAAGTAGATCAATTCCTATTCCAAAACATACATGATATCCTTATGCACCTCGTAGAXXXXXXXXXXCTTAGCCTCTCATATAGGCCCTTCATCACCCAAACATTCATAGCTCCATCAATAATCCAATCAACAACCCAACTTTATCCTACCATCATCGCCACTTCAA
>Marker209244	TTATAAGTTGAGTGCAATATTATGCCCAATGGATTCATTCTCTAAAAAACACATACATGGAAAAGCAACCTCAGGGATATGAAGGGAACAATGTTTTACAXXXXXXXXXXAAGGTATCAATAGGAAGAAGCTAAAGCTTTGCAATCTTCAAACAGGTTATTCTGCCTCTCCTATGCAGGGGTTACATGGACAAGGGTAGCCATGAAAGCT	TTATAAGTTGAGTGCAATATTATGCCCAACGGATTCATTCTCTAAAAAACACATACATGGAAAAGCAACCTCAGGGATATGAAGGGAACAATGTTTTACAXXXXXXXXXXAAGGTATCAATAGGAAGAAGCTAAAGCTTTGCAATCTTCAAACAGGTTATTCTGCCTCTCCTATGCAGGGGTTACATGGACAAGGGCAGCCATGAAAGCT
>Marker334444	ACTGTAATATGCTATTTGAGCCTTCCATAAACCCCAATCACACCACAAAAAAGTTTCACTTTGATTTAACATTTCTCCAGAAACTTAAACGTAGATGCATXXXXXXXXXXGTTGCCAAGGTCAATAACAACTTGCTATGCTCTGCCATTGATTAATTACAGCTTAGAAGAAAATTGTGCACCTACTTTGGTGTCTCCATTTACTCATGCT	ACTGTAATATGCTATTTGAGCCTTCCATAAACCCCAATCACACCACAAAAAAGTTTCACTTTGATTTAACATTTCTCCAGAAACTTAAAAGTAGATGCATXXXXXXXXXXGTTGCCAAGGTCAATAACAACTTGCTATGCTCTGCCATTGATTAATTACAGCTTAGAAGAAAATTGTGCACCTACTTTGGTGTCTCCATTTACTCATGCT
>Marker587210	ACCACCTTCATTTGTCCAAGCATGTTGTCAATGCACTCATACACTTTTCTAAGGTTTGAAGCATTAAAGTCCCCAAATCTGATGAGGAACTTGTGGCTATXXXXXXXXXXTTTTTATCTTATTCTGAGAAGGGTCTGCATTACAACAAGGTTGAATGCACCATTGATTACATCATCTAATCTCTAAAGTATGCTTGCCCAACAAAGCAGT	ACCACCTTCATTTGTCCAAGCATGTTGTCAATGCACTCATACACTTTTTTAAGGTTTGAAGCATTGAAGTCCCCAAATCTGATGAGGAACTTGTGGCTATXXXXXXXXXXTTTTTATCTTATTCTGAGAAGGGTCTGCATTACAACAAGGTTGAATGCACCATTGATTACATCATCTAATCTCTAAAGTATGCTTGCCCAACAAAGCAGT
>Marker190373	TGGATGCCCATGAGAGAGATGAGAGATAATTATTTAATTATTATTAGTCTTCAAGACTTTAAATATTATTATAATGGCATTAACAAGGAAGGTTACAGTTXXXXXXXXXXGGCAGCCACTTGTTTTAGGAAACCATTTGTGATTTATTATTTCTTATTCCTCTATAAATTAGATGTATTGGATATAGGTTTCATAGTGTGTCATAGGTTA	TGGATGCCCATGAGAGAGATGAGAGATAATTATTTAATTATTATTAGTCTTCAAGACTTTAAATATTATTATAATGGCATTAACAAGGGAGGTTACAGTTXXXXXXXXXXGGCGGCCACTTGTTTTAGGAAACCATTTGTGATTTATTATTTCTTATTCCTCTATAAATTAGATGTATTGGATATAGGTTTCATAGTGTGTCATAGGTTA
>Marker301358	TTTAAGTGAATGTTAGTCTTATGTCTCCAAGATCGAAGTAAAATTGAAGATATAGAAAGAATTCACTTCTTTTTTTATCTATATTATCTGGGAGTTTCATXXXXXXXXXXATCAAGAGGATAAGTGGTGCAATAACACTACACAAGAATTCACAATAATTCCAAATGTTTTTCACAACAAATATATGATTATGTAGTCTATATCAAGTTG	TTTAAGTGAATGTTAGTGTTATGTCTCCAAGATCGAAGTAAAATTGAAGATATAGAAAGAATTCACTTTTTTTTTTATCTATATTATCTGGAAGTTTCATXXXXXXXXXXATCAAGAGGATAAGTGGTGCAATAACACTACACAAGAATCCACAATAATTCCAAATGTTATTCACAACAAATATATGATTATGTAGTCTATATCAAGTTG
>Marker532507	CTCGCTCTTGTGGGTAATATTGAGCATGCTAGCATCATTCATCACTTCCTTAAAGTCACATTAGTTGAACTTCCTCCTTCGGTAAATATTGGTCATCCTTXXXXXXXXXXATATAATGTCCATGGTGATGCATTGCACCATGTGAGATCATTCTCTACCATATTCTTGGCTCATACCTATGAGGACTATGTATTGGCCAAATTCTTTCCT	CTCGCTCTTGTGGGTAATATTGAGCATGCTAGCATCATTCATCACTTCCTTAAAGTCACATTAGTTGAACTTCCTCCTTTGGTAGATATTGGTCATCCTTXXXXXXXXXXATATAATGTCCATGGTGATGCATTGCACCATGTGAGATAATTCTCCACCATATTCTTGGCTCATACCTATGAGGACTATGTATTGGCCAAATTCTTTCCT
>Marker414446	TAAGATGATTACACATGGATGATAATGATGATGCAGTTTGTTTTTGTTAGATATTTTTTATTTTATATTGTATGCAATGTGTATGGATGCATTTGATTCAXXXXXXXXXXACAATTCCCAAACTTAGCTTTGTAAAAGGCTAAATATTGATCCTTATCTAGACAAAAACAAATTGACAAGATTTCATCTTAGACAAGCAACAAATTTATT	TAAGATGATTACACATGGATGATAATGATGATGCAGTTTGTTTTTGTTAGATATTTTTTATTTTATATTGTATGCAATGTGTATGGATGCATTTGATTCAXXXXXXXXXXACAATTCCCAAACTTAGCTTTGTAAAAGGCTAAATATTGATCCTTATCTAGACAAAAACAAATTAACAAGATTTCATCTTAGACAAGCAACAAATTTATT
>Marker398682	AGATTTGGGGCCCTATGGCTAGCAAAGTTTTGTATAGAAGAAGTGTGACTTTCAAAGAAATTAAACCTTCACCCATTATATTGTAGTCAAAAGAGAATGTXXXXXXXXXXGAACTATGAAGGAAGTGATGGATATGAGTGATTCTAAGTCCTTGAGAGTGGCTATGGATGAGAAGATGGATGTATTAAGGAATAATGACACATAAGACTT	AGATTTGGGGCCCTATGGCTAGCAAAGTTTTGTATAGAAGAAGTGTGACTTTCAAAGAAATTAAACCTTCACCCATTATATTGTAGTCAAAAGAGAATGTXXXXXXXXXXGAACTATGAAGGAAGTGATGGATATGAGTGATTCTAAGTCCTTGAGAGTGGCTATGGATGAGAAGATGGATGTATTAAGGAATAATGACACATGAGACTT
>Marker576388	TCTGTCTGTATTTTTTGTTCTTAAAGATGTATCATTTGCATATACATATGAACATATGGAAAAGTAACAAACATGTTCCCTTTTGGTGCACCTTTTTACCXXXXXXXXXXACACATATTTTCATAGATTAGATATTGGATCACCCAATTATTCCACTTTAGTAATACTTTTTATAGATTCAAAGGACATTGCTTTTGGTCATTGCTCCAA	TCTGTTTGTATTTTTTGTTCTTAAAGATATATCATTTGCATATACATATGAACATATGGAAAAGTAACAAACATGTTCCCTTTTGGTGCACCTTTTTACCXXXXXXXXXXACACATATTTTCATAGATTAGATATTGGATCACCCAATTATTCCACTTTAGTAATACTTTTTATAGATTCAAAGGACATTGCTTTTGGTCATTGCTCCAA
>Marker583927	TCTGCCCTTTCAATTTATAAACTTGGGAAGGGGCATACAGAGGAGTTATCTGAAGATATGCATGATCTGCAAGATCTGCACGAAGGGAAGGTTTGCACCCXXXXXXXXXXTGTTAACTGATGCTACACCTTAACTAAAATTGAAACTCAGTCTTTGTTAACTGATGTTGCATGCTAACTGGAAGTGTTATTACTGAAAAAAACTATCCGA	TCTGCCCTTTCAATTTATAAACTTGGGAAGGGGCATACAGAGGAGTTATCTGAAGATATGCATGATCTGCAAGATCTGCACGAAGGGAAGGTTTGCACCCXXXXXXXXXXTGTCAACTGATACTACACCTTAACTAGAATTGAAACTCAGTCTTTGTTAACTGATGTTGCATGCTAACTGGAAGTGTTATTACTGAAGAAGACTATCCGA
>Marker149753	TTGCGACTATGCATAGATTATCGTATGCTAAATAACACAATGCTAAAGAACAAGTATCCATTTCCCCACATTGACAATCTCTTTGATCAAATGTGAGGGGXXXXXXXXXXACACAATGATTTTGACATAGAAAACCCTGTTAAGGGAAAAACCATGGGGTGACTAACCCAAGATTGTATTCTCTGTTAAAAGAATAAGATAGTGTAGAAT	TTGCGACTATGCATAGATTATCATATGCTAAATAACACAATGCTAAAGAACAAGTATCCATTTCCCCACATTGACAATCTCTTTGATCAAATGTGAGGGGXXXXXXXXXXACACAATGATTTTGACATAGAAAACCCTGTTAAGGGAAAAACCATGGGGTGACTAACCCAAGATTGTATTCTCTGTTAAAAGAATAAGATAGTGTAGAAT
>Marker490811	TTGATTCTATGAATAGAGATTATTGTATAATACCAGGGCCGCGTCACTATGCTTGCATGGTTGATCTTCTTGGTCGTTCTGGGCTTTTGAACGAGGCAGAXXXXXXXXXXAGATGCATACATTTGTAACTGGAGATAGAACACATCCTCAAGCAAGAAAGATATATGCAACTCTAGAATGGTTGGGCTGGCAAATGAAAGACTTAGGGTA	TTGATTCTATGAGTAGAGATTATTGTATAATACCAGGGCCGCGTCACTATGCTTGCATGGTTGATCTTCTTGGTCGTTCTGGGCTTTTGAACGAGGCAGAXXXXXXXXXXAGATGCATACATTTGTAACTGGAGATAGAACACATCCTCAAGCAAGAAAGATATATGCAACTCTAGAATGGTTGGGCTGGCAAATGAAAGACTTAGGGTA
>Marker441624	CATACTTTTAGCATCAGCAACATTACCACACCTACAAGGTCCTATTTGTATAGAAAAATCAACTCCCAACTTATGCCTTTTCCTGCAATAACTATGAGCAXXXXXXXXXXTTTGTAATGTTTCATATTTTCCTTGAATTCTAATTGTGGATATTTTCTGAAGAAGCAACCATTTACTTGAACTTTATCCAATCCATTGAATGATTGAGCT	CATACTTTTAGCATCAGCAACATTACCACACCTACAAGGTCCTATTTGTATAGAAAAATCAACTTCCAACTTATGCCTTTTCCTGCAATAACTATGAGCAXXXXXXXXXXTTTGTAATGTTTCATATTTTCCTTGAATTCTAATTGTGGATATTTTCTGAAGAAGCAACCATTTACTTGAACTTTATCCAATCCATTGAATGATTGAGCT
>Marker172320	TTGGAGGCCATGTCGAATGACATCAAGCAGTCTATTTACTTACAATCCTTAAATAGAATAATAGAAAAGTTAACAATACATTTATAGCATTGGTCCCCAAXXXXXXXXXXTATGATAGGGTTTCTTGGGAATTTTTGTTCAAATTCCTCGAGAAGATTGGCTTCCATGACAAATCTCTACATCTTATCAAAGCATGTATCACCACTGTGA	TTGGAGGCCATGTCGAATGACATCAAGCAGTCTATTTACTTACAATCCTTAAATAGAATAATAGAAAAGTTAACAATACATTTATAGCATTGGTCCCCAAXXXXXXXXXXTATGATAGGGTTTCTTGGGAATTTTTGTTCGAATTCCTCGAGAAGATTGGCTTCCATGACAAATCTCTACATCTTATCAAAGCATGTATCACCACTGTGA
>Marker303692	TACTGTTATTGTTATATTATTATTATACAATTTTTTATACAATATATTTAAACAACATAACCTATATAGATAATTATATGTTTTCTCAAAACTTGTTAAAXXXXXXXXXXAAAGGGATCAAAGTGCACATGTCCCCAAAAATCCAAAAGATCAAACACAGCTGCACCAAGCAAGCTTGTGCACGGTAACCCCATATCCACTCACATCCCT	TACTGTTATTGTTATATTATTATTATACAATTTTTTATACAATATATTTAAACAACATAACCTATATAGATAATTATATATTTTCTCAAAACTTGTTAAAXXXXXXXXXXAAAGGGATCAAAGTGCACATGTCCCCAAAAATCCAAAAGATCAAACACAGCTGCACCAAGCAAGCTTGTGCACGGTAACCCCATATCCACTCACATCCCT
>Marker118011	CACACATATGACTATGCATGTAGTGATGCCTAAGAATTAGTTTATAGGATTTAATTAGCACTACATCACAAACTATTTCTTCTTGGAAGTGATAAATAGAXXXXXXXXXXTGTGAGGTTTTGACTTAGATATTGGGATATGCATCAATTATCCCATTTGAGGGTTTGACATTAGCATCTCCAAATTCTACTTGTTGTGAGCATGTTCTTA	CACACATATGACTATGCATGTAGCGATGCCTAAGAATTAGTTTATAGGATTTAATTAGCACTACATCACAAACTATTTCTTCTTGGAAGTGATAAATAGAXXXXXXXXXXTGTGAGGTTTTGACTTAGATATTGGGATTTGCATCAATTATCCCATTTGAGGGTTTGACATTAGCATCTCCAAATTCTACTTGTTGTGAGCATGTTCTTA
>Marker253418	TGGATTGATTATTAGCCCAATTGTGTATCTAGTGAACTAATTGAAATTTGGGTAATGCAACCCCCACCCAATCTCGTCTAACGGGCACGAATTGAGGTTCXXXXXXXXXXCCCATGCACCCAACCTCAATTAAAAGGCATTAACTGAGGTTCTATAACTCCAAATTTCTACCTAGTTTAGTGCTAATTCTTTATCTACATGTCATATTTG	TGGATTGATTATTAGCCCAATTGTGTATCTAGTGAACTAATTGAAATTTGGGGTATGCAACCCCCACCCAATCTCATCTAACGGGCATGAATTGAGGTTCXXXXXXXXXXCCCATGCACCCAACCTCAATTAAAAGGCATTAACTGAGGTTCTATAACTCCAAATTTCTACCTAGTTTAGTGCTAATTCTTTATCTACATGTCATATTTG
>Marker333899	TTCAATATGAAATATTTAGGAGTTGCAAAATATATTTTTGGGTATGGAAATTAGCAAGGATTGGGTTAACAAAAAATTATGTTTAAATCAAAATAAGTATXXXXXXXXXXAAATCCTAGTAAAGAACATTGGACTTATGTAAAAAAGGTTTTCAGGTATATACATGGAACTTCTAACCATTATGTTTGTTATCATGGATCTAATGATGTG	TTCAATATGAAATATTTAGGAGTTGCAAAATATATTTTTGGGTATGGAAATTAGCAAGGATTGGGTTAACAAAAAATTATGTTTAAATCAAAATAAGTATXXXXXXXXXXAAATCCTAGTAAAGAACATTGGACTTATGTAAAAAAGGTTTTCAGGTATATACATGGAACTTCTAACCATTATGTTTGTTATCATGAATCTAATGATGTG
>Marker316997	ATACATCTTTTCAAAGTCCAACTTGATGATCAAGGCATCCTAAGAAAATTTTTGGGCCCATTCAATAGTCTTCCAAGCAAGGACTAGGTTGTGAAGAATTXXXXXXXXXXTCAATAGGTAAGCCATCCATACTAGGCCTTGTCTTAGCAACCATGCAATTAAGAGCTTCATCTAGTTCCTTAATATTTAAGAGTTTGTCAAGCTATTTCT	ATACATCTTTTCAAAGTCCAACTTGATGATCAAGGCATCCTAAGAAAATTTTTGGACCCATTCAATAGTCTTCCAAGCAAGGACCAGGTTGTGAAGAATTXXXXXXXXXXTCAATAGGTAAGCCATCCATACTAGGCCTTGTCTTAGCAACCATGCAATTAAGAGCTTCATCTAGTTCCTTAATATTTAAGAGTTTGTCAAGCTATTTCT
>Marker515912	ATAGGGTAAAACAACTAGAATATCTTGAAGAATCTAATGCATTTATGAATTGACAGTTTGAAATTAAGTAACATACAGGAAATGAAGTGAGGGACAATTAXXXXXXXXXXTCAATACACTTGTTTTCTCCATTGGCTGATTGCCTGCATTGTAGATCCACCATTCCACCTTGCAGATGTCTGTAATTGTTCTGTGCATTTGAGTAGTTGT	ATAGGGTAAAACAACTAGAATATCTTGAAGAATCTAATGCATTTATGAATTGACAGTTTGAAATTAAGTAACATACAGGAAATGAAGTGAGGGACAATTAXXXXXXXXXXTCAATACACTTGTTTTCTCCATTGGCTGATTGCCTGCATTGTAGATCCACCATTCCACCTTGCAGATGTCTGTAATAGTTCTGTGCATTTGAGTAGTTGT
>Marker283785	TTTATGAATTTTTCGCATTTATTTCTTACTCCATAGGTTGATTGTAATGTTTTAATCTCGCACCAATGACATACCCTGATATTGCATTTTTGTTAATTTGXXXXXXXXXXTTCAACCACAAAGTGAGTGCGGTGTGTAGATTTGGGATTATAAAGTTAATTGGTAGTGTTGCATCTGTTCCATACACTCTAGTTCAAATGGAGTGAACTT	TTTATGAATTTTTCGCATTTATTTCTTACTCCATAGGTTGATTGTAATGTTTTAATCTCGCACCAATGACATACCCTGATATTGCATTTTTGTTAATTTGXXXXXXXXXXTTCAACCACAAAGTGAGTGCGGTGTGTAGATTTGGGATTATAAAGTTAATTGGTAGTGTTGCATCTGTTCCATACACTCTAGTTCAAATGGTGTGAACTT
>Marker399657	TCATCTATTTTGCATCGGCTAGGGTTTTGAGGCATTCCATGAACATAATTGAAGGTCTGATGTAAAATCAGTCATACCTGATTTGTAACCAGCTCTTGATXXXXXXXXXXAGCTAGTTCTAGTTCCATAGCCAATCTAAATTCAAAACCGATCCAAATTCACCTCTTTGGAAGTATGTTGAAATGATACAACCGGTTCCAGGTAGTGGGG	TCATCTATTTTGCATCGGCTAGGGTTTTGAGGCATTTCATGAACATAATTGAAGGTCTGATGTAAAATCAGTCATACCTGATTTGTAACCAGCTCTTGATXXXXXXXXXXAGCTAGTTCTAGTTCCATAGCCAATCTAAATTCAAAACCGATCCAAATTCACCTCTTTGGAAGTATGTTGAAATGATACAACCGGTTCCAGGTAGTGGGG
>Marker295172	ACAATTTTATCTGTCAGGGGCATGCCCCTTCATCTCTTTGTTGACTGGGCAATATTCCTCATTGTTGGTAGCTATATTAGCTTACTGATTATCTTTATTGXXXXXXXXXXTACTGGTTAGGGCCCTCATGCTTAGTGAATTTGGCATTACATACCTACATACCATTCGATGCAATCTTCTCTTCATTCAGAACAAGCATCTTTTGTTGCA	ACAATTTTATCTGTCAGGGGCATGCCCCTTCATCTCTTTGTTGACTGGGCAATATTCCTCATTGTTGGTAGCTATATTAGCTTATTGATTATCTTTATTGXXXXXXXXXXTACTGGTTAGGGCCCTCATGCTTAGTGAATTTGGCATTACATACCTACATACCATTCGATGCAATCTTCTCTTCATTTAGAACAAGCATCTTTTGTTGCA
>Marker95600	TCCTTTGTATCCTAGATTGCCTACATACCCTGTATCCATGGGATCAAGGCATTTAACGATAAAGATGAGATGTAGTTCTGATTTGTGTTTTATTGATGCGXXXXXXXXXXGTTGGATTTTTTATTTTTTTGGAGATTTTGAAATGTTTTTACCTGTTTGGGTTTTTTAAAATGTTGGCAATAGATGATCATTTTGATAGCCTTTATGCTA	TCCTTTGTATCCTAGATTGCCTACATACCCTGTATCCACGGGATCAAGGCATTTAATGATAAAGATGAGATGTAGTTCTGATTTGTGTTTTATTGATGGGXXXXXXXXXXGTTGGATTTTTTATTTTTTTGGAGTTTTTGAAATGTTTTTACCTGTTTGGGTTTTTTAAAATGTTGGCAATAGATGATCATTTTGATAGCCTTTATGCTA
>Marker142880	GCTGTCAGTATACTCACTAAAACGATTTGCAACAATATAGATTCCTCTATTACTAAAGACTTAGCACCATTCTCCTTAACATGCAATACCCACTATCTCTXXXXXXXXXXATTGTTTCAAGACAAAAAATAACCATGAGAGATGTAGAGATGTCAACCGTTTCCAACAGAAGAATAACTAGCATATTTATATTAAATATATTATATCTAA	GCTGTCAGTATACTCACTAAAACGATTTGCAACAATATAGATTCCTCTATTACTAAAGACTTAGCACCATTCTCCTTAACATGCAATACCCACTATCTCTXXXXXXXXXXATTGTTTCAAGACAAAAAATAACCATGAGAGATGTAGAGATGTCAACTGTTTCCAACAGAAGAATAACTAGCATATTTATATTAAATATATTATATCTAA
>Marker421208	TGGGAGCTTCCTGATAGTGCGGTGTTTCATTTGAAGTTTAGAATGGATTGATCATGGAGGTGCTCATGGATACTTGGAGACTTAGGTGAAGATAGAGTTCXXXXXXXXXXGGCAGGTTGTTGCAAGAAGGTGAGGTGACACAAGTAAACACCAAGCATCTATGGTCCATATGTAGGACAACAACAAAGGTAAGAGCCATGCTTTAGGAAT	TGGGAGCTTCCTGATAGTGCGGTGTTTCATTTGAAGTTTAGAATGGATTGATCATGGAGGTGCTCATGGATACTTGGAGACTTAGGTGAAGATAGAGTTCXXXXXXXXXXGGCAGGTTGTTGCAAGAAGGTGAGGTGACACAAGTAAACACCAAACATCTATGGTCCATATGTAGGACAACAACAAAGGTAAGAGCCATGCTTTAGGAAT
>Marker377242	TACCATGGCATAATTAGACTTCCAAGAACACTTGCATAAGGAACATGACATGTCTTTACTATCTTCTTGTGTCTTGGGACATTATTCTATAAATAGTTCTXXXXXXXXXXACTATGATAAGAAAATGTCCACCAACATGTTTAAAATATATGCAATGATGAGCTCAACATTATACAAATCCAAGTCCCAACACATAAACATCAAACTTTT	TACCATGGCATAATTAGACTTCCAAGAACACTTGCATAAGGAACATGACATGTCTTTACTATCTTCTTGTGTCTTGGGACATTGTTCTATAAATAGTTCTXXXXXXXXXXACTATGATAAGAAAATGTCCACCAACATGTTTAAAATATATGCAATGATGAGCTCAACATTATACAAATCCAAGTCCCAACACATAAACATCAAACTTTT
>Marker254339	GGCTGCGGGATTTTCTTTTGGATATATAGAGTATTATGCTCTATCCTATTTATTAATACAAGGGAAAGGTTGATATTGGGTCAATTATCTCTATGTGTTGXXXXXXXXXXTATAAGTTATATTTGGTCTTACTTATAGTGCATTAGGCATTGAGGGATTAATTTATTTTAATATTTTTAGAAAACACCTTTACTACTTTCAATTTAAAAG	AGCTGCGGGATTTTCTTTTGGATATATAGAGTATTATGCTCTATCCTATTTATTAATACAAGGGAAAGGTTGATATTGGGTCAATTATCTCTATGTGTTGXXXXXXXXXXTATAAGTTGTATTTGGTCTTACTTATAGTGCATTAGGCATTGAGGGATTAATTTATTTTAATATTTTTAGAAAACACCTTTACTACTTTCAATTTAAAAG
>Marker252068	GAGCTTAAATGGAACTAACTCAAGCATGGTGAAGATGCTAATCTCTAGTTCAAGTATGTAATATTTATTATTTTGTAGATAGTGTGTTTCCTGTAGGCAGXXXXXXXXXXTGAAATATAAGAAGGATTTAAGTGTTTAAAGAAAAGAAAGTTTTGAGACAACTGATTCACCCCCCCTCTTAGTTGTCTATCCTAAATCTAACAAATCCTA	GAGCTTAAATGGAACTAACTCAAGCATGGTGAAGATGCTAATCTCTAGTTCAAGTATGTAATATTTATTATTTTGTAGACAGTGTGTTTCTTGTAGGCAGXXXXXXXXXXTGAAATATAAGAAGGATTTAAGTGTTTAAAGAAAAGAAAGTTTTGAGACAACTGATTCACCCCCCCTCTTAGTTGTCTATCCTAAATCTAACAAATCCTA
>Marker466118	AACACTACCAATACCATACATAGACTGAAAATCTCCATTATCAATCCATTTTGTAGCAACTTTGGCACTTGGCAATTCATCTCTTCATTCTCCTTTAGGCXXXXXXXXXXTGAACTCCACTGTATATTCTTCCTTTGGATTCTTCAAAGGATTGAACGCATATCTCTTGTCATCCAAGTGACAAAGTTCTATGTGTTTGCTTGCCCATCA	AACACTACCAATACCATACATAGACTAAAAATCTCCATTATCAATCCATTTTGTAGCAACTTTGGCACTTGGCAATTCATCTCTTCATTCTCCTTTAGGCXXXXXXXXXXTGAACTCCACTGTATATTCTTCCTTTGGATTCTTCAAAGGATTGAACGCATATCTCTTGTCATCCAAGTGACAAAGTTCTATGTGTTTGCTTGCCCATCA
>Marker190667	TATTAGTGCAATTACTCCTTATTTAGGAAAGTAGGATGACTCCTAGGAAAACATTTTTGAACTACCATATTGTAGATAGCCTTTAGACACCACCTGAGTTXXXXXXXXXXTACACTTGATTGATCATGACAATGATAATGAGGCACCATGGAAAGTAAATGCTCAAGCATGTTAAATATTGCATGTCCTCATATAATCCTTAGTCCTTAA	TATTAGTGCAATTACTCCTTATTTAGGAAAGTAGGATGACTCCTAGGAAAACATTTTTGAACTACCATATCGTAGATAGCCTTCAGACACCACCTGAGTTXXXXXXXXXXTACACTTGATTGATCATGACAATGATAATGAGGCACCATGGAAAGTAAATGCTCAAGCATGTTAAATATTGCATGTCCTCATATAATCCTTAGTCCTTAA
>Marker205249	ACAAAATCTGTCAACACTACATACAAGAATGAGATCCTCAGCAGGGGCCTTTTGCATCCATTTCAGCATCAAGCAAAGCACACAAACAAATATGCTGAAAXXXXXXXXXXATTTTTTATTACTCTAAGGATGGCGATAACAACAAAAAAAATCGAAGGTGTGAATGAAGTGGAGACCCAACTGTGAAGGCATAAACAAGGAAAAATTTGC	ACAAAATCTGTCAACACTACATACAAGAATGAGATCCTCAGCAGGGGCCTTTTGCATCCATTTCAGCATCAAGCAAAGCACACAAACAAATATGCTGAAAXXXXXXXXXXATTTTTTATTACTCTAAGGATGGCGATAACGACAAAAAAAATCGAAGGTGTGAATGAAGTGGAGACCCAACTGTGAAGGCATAAACAAGGAAAAATTTGC
>Marker452545	ACTGTGATCCTCAGAAAGTAACTTGGATGGCGTCTCAATTGTGGCAAATTTGCCATTTCTACAACTTACAATTTGCATTCATTCAATGATTGACATAAACXXXXXXXXXXTTAGTATCTTCAATAATGTCAATCTCTGGCCCCATTAGTCACCAATATCAAATCATTGTATTGCTCACGAGGATCATGAATATCTCCTTTAATGTTGAAT	ACTGTGATCCTCAGAAAGTAACTTGGATGGCGTCTCAATTGTGGCAAATTTGCCATTTCTACAACTTACAATTTGCATTCATTCAATGATTGACATAAACXXXXXXXXXXTTAGTATCTTCAATAATGTCAATCTCTGGCCCCATTAGTCACCAATATCAAATTATTGTATTGCTCACGAGGATCATGAATATCTCCTTTAATGTTGAAT
>Marker322699	ATGAGAACATGAGGGATGAGAACATGACATATAGGCGCCCTTCATGGCGCCCTAGTATAAAAGGAAATGCTTAAACACTCCAAAGTGCGCCTCAAGGTTTXXXXXXXXXXCACAGAACATTTAAATAGCGCCTTGATGCAAGACACTCCCTTTGGCGCCTAAGACAAAAGATCTTTGATTTCATAAGTTTGAGTGTATCTTTGAAGTCCA	ATGAGAACATGAGGGATGACAACATGACATATAGGCGCCCTTCATGGCGCCCTAGTATAAAAGGAAATGCTTAAACACTCCAAAGTGCGCCTCAAGGTTTXXXXXXXXXXCACAGAACATTTAAATAGCGCCTTGATGCAAGACACTCCCTTTGGTGCCTAAGACAAAAGATCTTTGATTTCATAAGTTTGAGTGTATCTTTGAAGTCCA
>Marker619670	AGGTTTTTTCACAGTGGTGTTTGCTTCAAAGAACAACAGAGATATGGTTTTGGCAAAGGGCCCTTGCGTCTGGAGAAATGCCTTGCTTTTTCTAAAACCCXXXXXXXXXXAAAGTGGACAGAAATATATGGAAGCAGCATCTTAACTATGAAAATCTAGCATTTCGATGTAGAAACTGTTTCAGTATGACATATGTCTGCTTCTTGTCCA	AGGTTTTTTCACAGTGGTGTTTGCTTCAAAGAACAACAGAGATATGGTTTTGGCAAAGGGCCCTTGCGTCTGGAGAAATGCCTTGCTTTTTTTAAAACCCXXXXXXXXXXAAAGTGGACAGAAATATATGGAAGCAGCATCTTAACTATGAAAATCTAGCATTTCGATGTAGAAACTGTTTCAGTATGACATATGTCTGCTTCTTGTCCA
>Marker458855	TTGAAATATCTAAGGCAATGATTGAGATAATTGTAAATTATTCTTTGGATTTTAATTTTTGTTAACATTGTATCTATAGGAAACTAGATCTTATGGCATTXXXXXXXXXXGATGGTGGAGAATTATGTTTAGTAGAGTGATTTTTTTGTAAGGACAATGGCATAGAAAGATAGAAGACAAATCCATATTTTTAGGAAAATGCCTACATTA	TTGAAATATCTAAGGCAATGATTGAGATAATTGTAAATTATTGTTTGGATTTTAATTTTTGTTAACATTGTATCTATAGGAAACTAGATCTTATGGGATTXXXXXXXXXXGATGGTGGAGAATTATGTTTAGTAGAGTGATTTTTTTGTAAGGACAATGGCATAGAAAGATAGAAGACAAATCCATATTTTTAGGAAAATGCCTACATTA
>Marker421149	AATGGAGGAATTTAAGGCCACATGGGTCTCGCATGGGTGCAACATTATCAGGGTGGACAGACATTAGAAATATCCATGACAATGTTAATACAATCATGGAXXXXXXXXXXCTCCTACAACTAGATGCCGACCAACCTTGTATGTGCAACCTTGTCCCAATTTGCATTAGCTCCTTTGGCTCTACATCCCACCTTGCTGCTAGACTCTCCT	AATGGAGGAATTTAAGGCCACACGGGTCTCGCATGGGTGCAACATTATCAGGGTGGACAGACATTAGAAATATCCATGACAATGTTAATACAATCATGGAXXXXXXXXXXCTCCTACAACTAGATGCCGACCAACCTTGTATGTGCAACCTTGTCCCAATTTGCATTAGCTCCTTTGGCTCTACATCCCACCTTGCTGCTAGACTCTCCT
>Marker262670	TTCAATACCACTTCTTTTTCTTCCATTTCTCCACCAAGACCTTTGATGCTATTGACAACTTTATCCACTTTCTGCAAGTAACTTGTGATGTTTTCATCTTXXXXXXXXXXTTTAAGGCTGGTAAATTAGAGAAGAATGTGGAATCAAATCAAGAGGATTTTGATGATATGGAAGCTAACTTTGTGAGAAGAGTGAAAAAGGGTGCTGGTA	TTCAATACCACTTCTTTTTCTTCCATTTCTCCACCAAGACCTTTGATGCTATTGACAACTTTATCCACTTTCTGCAAGTAACTTGTGATGTTTTCATCTTXXXXXXXXXXTTTAAGGCTGGTAAATTAGAGAAGAATGTGGAATCAAATCAAGAGGATTTTGATGATATGGAAACTAACTTTGTGAGAAGAGTGAAAAAGGGTGCTGGTA
>Marker334053	AATCGATTGCTACACCTCTGAGTGTGGTTGGAAATGACCATAGCCAATAATTTTTATCATTCTATCCATTTGCATCCCAAATGATTTCACACATTTTGCAXXXXXXXXXXTATCAACCTCAAGTTCTCTTTACTCCAATCCTTTACCCTAGTATTCTTGGCTCAATTTCTTCTTCGATCAACAACTCTTCAATACCACAAAGATTGCTTC	AATCAATTGCTACACCTCTGAGTGTGGTTGGAAATGACCATAGCCAATAATTTTTATCATTCTATCCATTTGCATCCCAAATGATTTCACACATTTTGCAXXXXXXXXXXTATCAACCTCAAGTTCTCTTTACTCCAATCCTTTACCCTGGTATTCTTGGCTCAATTTCTTCTTCGATCAACAACTCTTCAATACCACAAAGATTGCTTC
>Marker632365	TTTCAAGTCAATCTCATTGACCCCTATTTCGTAAGTAGTGATTCACTTGAACTCAGCTCTCATGAGCATGAATGGTCCACTTAGCACTCAATGCTCAGATXXXXXXXXXXTGTCATCATCTTCATTAATCACCACCAAGGGAATAAAACACCCTAATGATGTCCTCAAGGACAATGTTCTGGGCTAAGAGGTCCCAACAATTCTACTAAA	TTTCAAGTCAATCTCATTGACCCCTATTTCGTAAGTAGTGATTCACTTGAACTCAGCTCTCATGAGCATGAATGGTCCACTTAGCACTCAATGCTCAGATXXXXXXXXXXTGTCATCATCTTCATTAATCACCACCAAGGGAATAAAACACCCTAATGATGTCCTCAAGGACAATGTTCTGGGCTAAGAGGTCCCAGCAATTCTACTAAA
>Marker252722	AGATCCCATGTATTATTTTTCTTTAACACAAACATCTCTTTTTCCATAGCCACTTTCTAGAAATTTGCATCATTCATACACATAGCCTCCTTTATATTCCXXXXXXXXXXCCAGCCTTCTCTATCTACAATATTATGGAAGAGGACTTAACTTCTCTAAAGATAACACTTCTGCTATGCAAAACTCTCTCAGCCATAAGATCCCAAAGCT	AGATCCCATGTATTATTTTTCTTTAACACAAACATCTCTTTTTCCATAGCCACTTTCTAGAAATTTGCATCATTCATACACATAGCCTCCTTTATATTCCXXXXXXXXXXCCAGCCTTCTCTATCTACAATATTATGGAAGAAGACTTAACTTCTCTAAAGATAACACTTCTGCTATGCAAAACTCTCTCAGCCATAAGATCCCAAAGCT
>Marker402464	TTGATATCTCTAAACATGTCATCCACATACAAGGCAACAATTAGTATATGATTATCAATACATCTAGAATCAGTATATGATTATCAATACATCTAGAATCXXXXXXXXXXAAAAGAAATCTAATAGAAGATAATTTAGCAACAAGAGAGAATATTTCATCGAAATCAACTCCTTCTCTCTAGGAGTAGCCCTTGGCTACTAGTCTCGCCT	TTGATATCTCTAAACATGTCATCCACATACAAGGCAACAATTAGTATATGATTATCAATACATCTAGAATCAGTATATGATTATCAATACATCTAGAATCXXXXXXXXXXAAAAGAAATCTAATAGAAGATAATTTAGCAACAAGAGAGAATATTTCATCAAAATCAACTCCTTCTCTCTAGGAGTAGCCCTTGGCTACTAGTCTCGCCT
>Marker269337	CTTCGTTTGTGTATTGATTATAGGGAGCTTAACAAGAGGACCATAAAGAATAGATATCCAATACCAAGAATTGATGAATTATTGGATGAGCTTCATGGAGXXXXXXXXXXTTGGAGGCTAATTCCTTATTTGCCAAAGAAGCCAAGTGTGAGTTTGGCCTAACAGAGATTGTATATTTAGGCCATGTTATCAGTGCCAAGGGAGTTAGCA	CTTCGTTTGTGTATTGATTATAGGGAGCTTAACAAGAGGACCATAAAGAATAGATATCCAATACCAAGAATTGATGAATTATTGGATGAGCTTCATGGAGXXXXXXXXXXTTGGAGGCTAATTCTTTATTTGCCAAAGAAGCCAAGTGTGAGTTTGGCCTAACAGAGATTGTATATTTAGGCCATGTTATCAGTGCCAAGGGAGTTAGCA
>Marker506766	ACATTGCTTAACAAAGTTTTTTGAAGATTTGGAAAGAAGGGGTGTCAAAATTGAAAAATGTTTTGTATGGTTAGATGGGTTTGTGTCATAATTCAAATCAXXXXXXXXXXAACTAATCATACCAATCAAACCAACTTAGCTATGAATGATGTTATCCAAGGATAATTAGCAAAGGAAGAATATCAAACTAGAAATCCCCAAGACAATGAG	GCATTGCTTAACAAAGTTTTTTGAAGATTTGGAAAGAAGGGGTGTCAAAATTTAAAAATGTTTTGTATGGTTAGATGGGTTTGTGTCATAATTCAAATCAXXXXXXXXXXAACTAATCATACCAATCAAACCAACTTAGCTATGAATGATGTTATCCAAGGATAATTAGCAAAGGAAGAATATCAAACTAGAAATCCCCAAGACAATGAG
>Marker260815	ACATTCAAGGACAAAACTAAGCCAAGTCACTTCAAGATGCAAGAGAAATCAACTACTAATTTTGTGCTCTTGTTTGTAGAGGAAATATGTGATTCAACCAXXXXXXXXXXTTTGCCTACTGGACACTGGGGCTAGCGCCCAAGTTTGCTACAGGTGAATTTCCAAACTTTGTTTTCAGAACTTGAATCTTGATCCCTTAAATAGCCTCCC	ACATTCAAGGACAAAACTAAGCCAAGTCACTTCAAGATGCAAGAGAAATCAACTACTAATTTTGTGCTCTTGTTTGTAGAGGAAATATGTGATTCAACCAXXXXXXXXXXTTTGCCTACTGGACACTGGGGCTAGCGCCCAAGTTTGCTACAGGTGAATTTCCAAACTTTGTTTTCAGAACTTGAATCTTGATCCCTTAAATAGCCTCCT
>Marker578772	TAGTTTGTAGAATAATAATGAAGATAGAACCTGATGTGGTGTAGATTTTTGCTCTCATATGTATAGAAAATAGAAAATCTAGTAATCCTCATTATCTAGAXXXXXXXXXXGATGAAGATCAATAGACAAGAAGCAATCATGCAAGTGAAGTAGAATTGATTTTGATGCAAAATATCATTCCTTTTAAAGCTTTAAATTAAAATGTTCCTA	TAGTTTGTAGAATAATAATGAAGATAGAACCTGATGTGGTGTAGATTTTTGCTCTCATAGGTATAGAAAATAGAAAATCTAGTAATCCTCATTATCTAGAXXXXXXXXXXGATGAAGATCAATAGACAAGAAGCAATCATGCAAGTGAAGTAGAATTGATTTTGATGCAAAATATCATTCCTTTTAAAGCTTTAAATTAAAATGTTCCTA
>Marker354318	TGATGTTTGAAGGATCTTTGATAGGCTCTTGGATAGATGTTTGATGACATGGAGATGGATGATTCCTTGCTAATAGCCATTGGATCACATCCTTCACAAGXXXXXXXXXXGGATCACCTATGACAATCTTCCCACACTTTTCAAGATTTTGGATCACTCGAGCATAAGTGTATAACAATTGAATGTCATATGGCCCATAACCCTATGATA	TGATGTTTGAAGGATCTTTGATAGGCTCTTGGATATATGTTTGATGACATGGAGATGGCTGATTCCTTGCTAATAGCCATTGGATCACATCCTTCACAAGXXXXXXXXXXGGGTCACCTATGACAATCTTCCCACACTTTTCAAGATTTTGGATCACTCAAGCATAAGTGTATAACAATTGAATGTCATATGGCCCATAACCCTATGGTA
>Marker212485	TATGTCATGTTTCACCAATTAAATCGGTGGGACCTCAAAACCCCGCAAGCCTTGAAACTACTTTTTTCTAAAAATCTCTTGCGCCCACCTTGCACTAACTXXXXXXXXXXAGACCCCAATTTTAGAGCTTTTTGGCCTACAAGTCGGATGACCCTAAAAATAGTGCAAACCATGCAAAATGACTATGTTTTGAAGGATTTTCAAAAGGAA	TATGTCATGTTTCACCAATTAAATCAGTGGGACCTCAAAACCCCGCAAGCCTTGAAACTACTTTTTTCTAAAAATCTCTTGCGCCCACCTTGCACTAACTXXXXXXXXXXAGACCCCAATTTTAGAGCTTTTTGGCCTACAAGTCGGATGACCCTAAAAATAGTGCAAACCATGCAAAATGACTATGTTTTGAAGGATTTTCAAAAGGAA
>Marker773855	ATTTCACTGTGCAAATCAAAGTTCCTCCAAGCCCACTTTAGAAATCCAAAAGTTAAATTGTGAATATTAGGCAGGATCTGAGGGTTTAGGCAAAAGGTGAXXXXXXXXXXAAGAATGGATTAGTTTTGTAAGTTAGGGTGTTGGTAGATGCAAGAAGTTAGTTTATAAAGTGGTTGAAAGAGGTGGTTAATGGTTAGAGGTAGTCATGGA	ATTTCACTGTGCAAATCAAAGTTCCTCCAAGCCCACTTTATAAATCCAAAAGTTAAATTGTGAATATTAGGCAGGATCTGAGGGTTTAGGCAAAAGGTGAXXXXXXXXXXAAGAATTGATTAGTTTTGTAAGTTAGGGTGTTGGTAGATGCAAGAAGTTAGTTTATAAAGTGGTTGAAAGAGGTGGTTAATGGTTAGAGGTAGTCATGGA
>Marker119569	GTGATATTCCTTGCATCTTCAACTACGTTTTCACACAGCTTAGTTTCCCTATGTCCTCAAGGAGTTGGTCAAGGTAGTGGACAGCACAAGGACTTCAAAAXXXXXXXXXXATGATCACCTGCAAAACCAAAGATTAGCCTTTCACAAGAGAGTAGCAAGAGGATAAATTGCTTGATTGTGGTGCAAAATGGAATTATGATATTATGATAT	GTGATATTCCTTGCATCTTCAACTACGTTTTCACACAGCTTAGTTTCCCTATGTCCTCAAGGAGTTGGTCAAGGTAGTGAACGGCACAAGGACTTCAAAAXXXXXXXXXXATGATCACCTGCAAAACCAAAGATTAGCCTTTCACAAGAGAGTAGCAAGAGGATAAATTGCTTGATTGTGGTGCAAAATGGAATTATGATATTATGATAT
>Marker355112	CATGACACCTGTTTGCTAGCTTTTCATCATTATACCTATCCAAGGCACCTATTTTCCAGGTTTTCACCAAAGGACATTTTTTTTGTATTTTTCTAGTTTTXXXXXXXXXXTTGTAGCTTCATGACATCATTTGTTGATATGATTTGAGATGATCAAAGGCTTTCTATCTCCTTTCCTCTAGCAACTCTAGTTCTTGCAATTTAGAAAATC	CATGACACCTGTTTGCTAGCTTTTCATCATTATACCTATCCAAGGCACCTATTTTCCAGGTTTTCACCAAAGGACATTTTTTTCGTATTTTTCTAGTTTTXXXXXXXXXXTTGTAGCTTCATGACATCATTTGTTGATATGATTTGAGATGATCAAAGGCTTTCTATCTCCTTTCCTCTAGCAACTCTAGTTCTTGCAATTTAGAAAATC
>Marker269384	TAGTTTCCCACAGCTTAAAAGATTGGGTTTTAACCCCCATGTTGGCGAGGACGTCAGCAACTCCGTTTCCCTTACGGAAGATATGGGAAATAAGCATGTCXXXXXXXXXXACTCCCCCACTTCCTGTCGGCCCAGGATTACCCTTGGCTGCCCCACATGCAAGGCTCTTGTTGCATGTGTTTGTTTATTTTATTTATTTGTTGTGTTATG	TAGTTTCCCACAGCGTAAAAGATTGGGTTTTAACCCCCATGTTGGTGAGGACGTCAGCAACTCCGTTTCCCTTACGGAAGATATGGGAAATAAGCATGTCXXXXXXXXXXACTCCCCCACTTCCTGTCGGCCCAGGATTACCCTTGGCTGCCCCACATGCAAGGCTCTTGTTGCATGTGTTTGTTTATTTTATTTATTTGTTGTGTTATG
>Marker486652	AGTCCCAAATGACTCCCAGCTCCTCTTGCAGTAGTAGAGAATGAAGGATGAAACATCCATGCACAAGTTAAGCTACCCACTTGCAGCAGTCCAGAAATATXXXXXXXXXXCACACCACCAGGATGCTCACCAACTCTGCTAAGCAATGGCTCCATCAAATACAACCAGCTCCGCATGACTCCAGCACTCTGCCAATCACGCAGCAAGCTC	AGTCCCAAATGACTCCCAGCTCCTCTTGCAGTAGTAGAGAATGAAGGATGAAACATCCATGCACAAGTTAAGCTGCCCACTTGCAGCAGTCCAGAAATATXXXXXXXXXXCACACCACCAGGATGCTCACCAACTCTGCTAAGCAATGGCTCCATCAAATACAACCAGCTCCGCATGACTCCAGCACTCTGCCAATCACGCAGCAAGCTC
>Marker492686	TCAACATGCTCAAGCCAAATATTAACCTGCTAGAGGCCACTGAGTGCAAGATCCAATTAAAATTCAAGTTCATCAGGAAATATTTAAACCACAGATTATGXXXXXXXXXXGAACAGGGGGATGGGGGAATGCAGGGATGGGTTTAGGGGACTGGGGGACCATGGGCCCAAATTTGGGGACAGTGGGCGGATGGCACTGCAAATATAATAT	TCAACATGCTCAAGCCAAATATTAACCTGCTAGAGGCCACTGAGTGCAAGATCCAATTAAAATTCAAGTTCATCAGGAAATATTTAAACCACAGATTATGXXXXXXXXXXGAACAGGGGGATGGGGGAATGCAGAGATGGGTTTAGGGGACTGGGGGACCATGGGCCCAAATTTGGGGACAGTGGGCGGATGGCACTGCAAATATAATAT
>Marker425000	ATCTATGAAAAATCTCTGCATGCAACCCAAAATAATAAAACCTTGTAGATGTAATACAATTGTCAAATAGATCTATGGAAGATTTCTTTTACCTTGCAAGXXXXXXXXXXAAGTTTTTAATATAATAGAAATTACATAATTAGCTCATAAAATGTAGTTTACTTTTTTTTGAGAAAAATGAGTAAAAATTTATTAATAAAATAAATCAAC	ATCTATGAAAAATCTCTGCATGCAACCCAAAATAATAAAACCTTGTAGATGTAATACAATTGTCAAATAGATCTATGGAAGATTTCTTTTACCTTGCAAGXXXXXXXXXXAAGTTTTTAATATAATAGAAATTACATAATTAGCTCATAAAATGTAGTTTACTTTTTTTTGAGAAAAAGGAGTAAAAATTTATTAATAAAATAAATCAAC
>Marker291985	TAATAATATCATATATATCATAAATCATACCAACAACACTATCTTTTCCATGATCATCAACCTTTATCAGGTTCATCTTATTATACACCCACTAATTGGTXXXXXXXXXXTATGGCTAGTAGATTATTTTAAATTCCTACATGATGCCACTCATTGTTTTCATTTCTATTTTGTAGGTTTACAAGATGGACCACTCATTTCAAGAGAATA	TAATAATATCATATATATCATAAATCATACCAACAACACTATCTTTTCCATGATCATCAACCTTTATCAGGTTCATCTTATTATACACCCACTAATTGGTXXXXXXXXXXGGCTAGTAGATTATTGTTTTAAATTCCTACATGATGCCACTCATTGTTTTCATTTCTATTTTGTAGGTTTACAAGATGGACCACTCATTTCAAGAGAATA
>Marker228021	TAGCTTAGTAGATGAAACATTCTTCTCTTTCCCAGCACCCAAATCCACAATGGGTTTACTCTTAGCCTCCCCAGTTGATTTAATCTTCACTTTCTTCACAXXXXXXXXXXCAAATAGTCCTTATTAAAGATTTAGAATTTACAAGACCTTTTAAAACATTAAATATTTCTTTTTTAAATCATCACCTTAATAATGTTATGTCATCCTAAT	TAGCTTAGTAGATGAAACATTCTTCTCTTTCCTAGCACCCAACTCCACAATGGGTTTACTCTTAGCCTCCCCAGTTGATTTACTCTTCACTTTCTTCACAXXXXXXXXXXTTATTAAAGATTTAGAATTTACAAGACCTTTTAAAACATTAAATATTTCTTTTTTAAATCATCACCTTAATAATGTTATGTCATCCTAATTGTTCCTAAT
>Marker487506	AAATGAATATTTGCCTCATGAATGACTTCTACATTTTGGGCTGCAATTTATGTTGTTGAAGATGCAAGAGAATTCTGAAAATGTTGGATGTGGTTCTCCCXXXXXXXXXXTGAAATAATCAATCTTGGGAAATGGTTTACTGATTTTTCATACATATTGTGTTCAGTGCACTATATGTTATGCACAATCTCCATTTGTTATGTTCGCTTG	GAATGAATATTTGCCTCATGAATGACTTCTACATTTTGGGCTGTAATTTATGTTGTTGAAGATGCAAGAGAATTCTGAAAATGTTGGATGTGGTTCTCCCXXXXXXXXXXTGAAATAATCAATCTTGGGAAATGGTTTACTGATTTTTCATACATATTGTGTTCAGTGCACTATATGTTATGCACAATCTCCATTTGTTATGTTCGCTTG
>Marker237364	AATAGTGGCAAATATTAAGATGGACTTACAACCTTTAAAGGGAGGCGCTCACATTCAAGGGAAGTGATTACTTATTTCCAAGGCTTAAAGAGCCTTCCTAXXXXXXXXXXCAGCTTCATATGCAGAGTAATGGGTTCTTCTTGAGGTCAGAAAGTTGGTTTTATTATCATTTGTAATTTCTGATTTTAATATAGTATTTCTGGTTTTATC	AATAGTGGCAAATATTAAGATGGACTTACAACCTTTAAAGGGAGGCACTCACATTCAAGGGAAGTGATTACTTATTTCCAAGGCTTAAAGAGCCTTCCTAXXXXXXXXXXCAGCTTCATATGCAGAGTAATGGGTTCTTCTTGAGGTCAGAAAGTTGGTTTTATTATCATTTGTATTTTCTGATTTTAATATAGTATTTCTGGTTTTATC
>Marker445655	GGGCACCCCTGGAAGTGGTGTTAGAAAACCTAGAATAGTTATTTTGGTGAAAAATCAAATCTATAGCTCAAAAATTGAGTTTATTCATTTTTATAACAAAXXXXXXXXXXCATGCTATTCTATTATTTTGGATCATAAGAACTATATGTCCTAGAAAGAAGAGATCGTGGATCACTTAATAAACTAATGACATAACATGTGCATCTATAG	GGGCACCCCTGGAAGTGGTGTTAGAAAACCTAGAATAGTTATTTTGGTGAAAAATCAACTCTATAGCTCAAAAATTGAGTTTATTCATTTTTATAACAAAXXXXXXXXXXCATGCTATTCTATTATTTTGGATCATAAGAACTATATGTCCTAGAAAGAAGAGATCGTGGATCACTTAATAAACTAATGACATAACATGTGCATCTATAG
>Marker365463	TATGGAATCTATTAAATGGTAAGTCATTTATAAATCTCCCCAATCTAAGCTTGTATAAATTATTTCCTCAAGGTGATTGTAATCAATTTTCCATGGTATGXXXXXXXXXXTGGCAACAATTGCATAAAATCTTAGTGTTGACTCTAGTAAATTTAACACATTTCTAAAAGCAACCCCACTTACAACTATGAGTGGCTATTTTTTGATATT	TATGGAATCTATTAAATGGTAAGTCATTTATAAATCTCCCCAATCTAAGCTTGTATAAATTATTTCCTCAAGGTGATTGTAATCAATTTTTCATGGTATGXXXXXXXXXXTGGCCACAATTGCATAAAATCTTAGTGTTGACTCTAGTAAATTTAACACATTTCTAAAAGCAACCCCACTTACAACTATGAGTGGCTATTTGTTGATATT
>Marker406786	TTTTTCTCATTGTATTTGGGGGTTCAAGCTATTTTGTAATCAGATTTTCTTTTGAGTTTGGTTTTCAGATATTGTTGTGTAGTTGCAGCTCTACTTTCATXXXXXXXXXXTACTGACTTGGACAGGGTATGCGCTTCTTTCTTCACCATGCTATTTAGAAAAGACCCACTTTTTGTAGGATATTGATGCGGCTAAGCAAATGTTATTACT	TTTTTCTCATTGTATTTGGGGGTTCAAGCTATTTTGTAATCAGATTTTCTTTTGAGTTTGGTTTTCAGATATTGTTGTGTAGTTGCAGCTCTACTTTCATXXXXXXXXXXTACTGACTTGGACAGGGTATGCGCTTCTTTCTTCACCATGCTATTTAGAAAAGACCCACTTTTTGTAGGATATTGATGCGGCTAAGCAAATATTATTACT
>Marker546396	ATAGTTCTTGCATCCCAAATTCACGTTTTGATTCTTCTGCATATAAACCTTTTGATTCCAAAATACCAAGCACCTCATCTAAATGCTTAAGATGCTCTTCXXXXXXXXXXGTTGCAAACAGTCGATAGACTGAAATAGAAAGTTTCAAATTAAAGATTTGAAAGAAGATTCACATCAAATTACATACCGATAGCTTCTCAGTCTTCTTAC	ATAGTTCCTGCATCCCAAATTCACGTTTTGATTCTTCTGCATATAAACCTTTTGATTCCAAAATACCAAGCACCTCATCTAAATGCTTAAGATGCTCTTCXXXXXXXXXXGTTGCAAACAGTCGATAGACTGAAATAGAAAGTTTCAAATTAAAGATTTGAAAGAAGATTCACATCAAATTACATACCGATAGCTTCTCAGTCTTCTTAC
>Marker769957	CTTGTTTGATCAACTTCCTTAATTTGTTGACAAAGATAAGGAGAGTAGACCAATGCCCACATCAGCAAAAGATTTCAAGCAGTGTGAGGATGTTGGAGACXXXXXXXXXXAAGAGCATATGCTTCAAGGGAGAGATATTGATGTTCCTTCAAAACTTCAAGAGAGCTTCCATGGAGCTAACACGAGTCCTCTTATGTGGAAGAATGAGGA	CTTGTTTGATCAACTTCCTTAATTTGTTGACAAAGATAAGGAGAGTAGACCAATGCCCACATCAGCAAAAGATTTCAAGCAGTGTGAGGATGTTGGAGACXXXXXXXXXXAAGAGCATATGCTTCAAGGGAGAGATATTGATGTTCCTTCAAAACTTCAAGAGAGCTTCCATGGAGCTAACATGAGTCCTCTTATGTGGAAGAATGAGGA
>Marker408941	ATGGTGAGATGGTTCGGCCACCATAGGACACTTGGTGATTTTGTTATCTCTTTTTGAACCCCTTATTCTACTCAAGTTCACATTATCGATGTAATGACTAXXXXXXXXXXCTTATATTGTAATATCCACAGCTTGTTCAATAAGGCTTTTAAAAGTAATTATAACATAGGCATTTAGGACAGTCATGATGGTTTTTGGAAGCATTTTTTG	ATGGTGAGATGGTTCGGCCACCATAGGACACTTGGTGATTTTGTTATCTCTTTTTGAACCCCTTATTCTACTCAAGTTCACATTATCGATGTAATGACTAXXXXXXXXXXTTTATATTGTAATATCCACAGCTTGTTCAATAAGGCTTTTAAAAGTAATTATAACATAGGCATTTAGGACAGTCATGATGGTTTTTGGAAGCATTTTTTG
>Marker383097	ATTATTTCTACATTCCATTGATAAATTTGATCTATTTAAAATACAATAGAAAGTGAATTAATTTATTTATTAAGTAAAACACTTCCACGAGATTAAATTTXXXXXXXXXXTCATTAATTTGACCATGGATGTATGATTAAAAAGATGTGATGGAATTGCTCAAGGAATATTGTTGCTACAAGTAGAGCCATGTCATGCAAGACTTAGTCT	ATTATTTCTACATTCCATTGATAAATTTGATCTATTTAAAATACAATAGAAAGTGAATTAATTTATTTATTAAGTAAAACACTTCCACGAGATTAAATTTXXXXXXXXXXATCATTAATTTGACCATGGATGTATGATTAAAAAGATGTGATGGAATTGCTCAAGGAATATTGTTGCTACAAGTAGAGCCATGTCTGCAAGACTTAGTCT
>Marker436555	CCATTTGAGACCTCAGGGTCTTCTTAGATGATGCAATGACATAGGTGTAAGTTCTTCAAATCTATTTTTTTATTTTGGTGCTCGGTATCAATCACCTTCTXXXXXXXXXXGGGATCTTTTAATGCAGCTCATTAGCATAAGCTTCTAAAGAAAAAGATAACTCTTGGTAGTTCATTGGCAAGGCACCCCCTTGCTCCATCAAGTCCCATA	CCATTTGAGACCTCAGGGTCTTCTTAGATGATGCAATGACATAGGTGTAAGTTCTTCAAATCTATTTTTGTATTTTGGTGCTCGGTATCAATCACCTTCTXXXXXXXXXXGGGATCTTTTAATGTAGCTCATTAGCATAAGCTTCTAAAGAAAAAGATAACTCTTGGTAGGTCATTAGCAAGGCACCCCCTTGCTCCATCAAGTCCCATA
>Marker315176	TTATTCGCATCTCTCATGTCTCAATTCATTTTATCAGTATTCAAGTGAAATAGCCTTGTCCCGTATTGTGAAGGTGGTTATTTGTAGCTTGTGCTCCTGGXXXXXXXXXXTCATATTCTAGGTATCAATCATCTAGGTCACACTGTTTTGTCTGCAACTTTGAGGTATGCATTTATTGTCATTATTTGATTTTATTCTCAAATCCAATCA	TTATTCGCATCTCTCATGTCTCAATTTATTTTATCAGTATTCAAGTGAAATAGCCTTGTCCCGTATTGTGAAGGTGGTTATTTGCAGCTTGTGCTCCTGGXXXXXXXXXXTCATATTCTAGGTATCAATCATCTAGGTCACACTGTTTTGTCTCCAACTTTGAGGTATGCATTTATTGTCAGTATTTGATTTTATTCTCAAATCCAATCA

## Sheet: LG2
>Marker180744	ATATTCAAGTCATCCAGATGTAACTAAGCTCCTAGTGGACATGAAACCTCTTTATTTCTAGAAAGAAATGAAGAATGACATTGTAAGATTTGTAGCAAGTXXXXXXXXXXTGGTAAGCAAGAATAGAGCATGTAGCAAGGTCTGACAGTCAGGTCTGGATCTCTCAGAGGAAGTATGTCAGTAAAGTGCAAACTTGGGGAAGTCAAGAGG	ATATTCAAGTCATCCAGATGTAACTAAGCTCCTAGTGGACATGAAACCTCTTTATTTCTAGAAAGAAATGAAGAATGACATTGTAAGATTTGTAGCAAGTXXXXXXXXXXTGGTAAGCAAGAATAGAGCATGTAGCAAGGTCTGACAGTCAGGTCTGGATCTCTCAGATGAAGTATGTTAGTAAAGTGCAAACTTGGGGAAGTCAAGAGG
>Marker224205	ATTGTAGCATTCCTAATCGCTTTCTTGAGACAAGACACATGAAAAACTAGGTGAATTTTAGAAGAGGGTGGTGACAGGCTAGTATTCTCACCTGTCACATXXXXXXXXXXCTAAGAAAAAGCATGTAAACTATCTAAGAATCAACACTTGCAGTTTAACTATGAAATTTAAACAAAGATCACTAACTACTAATGACTAACTATTACTGAA	ATTGTAGCATTCCTAATCGCTTTCTTGAGACAAGACACATGAAAAACTAGGTGAATTTTAGAAGAGGGTGGTGACAGGGTAGTATTCTCACCTGTCACATXXXXXXXXXXCTAAGAAAAAGCATGTAAACTATCTAAGAATCAACACTTGCAGTTTAACTATGAAATTTAAACAAAGATCACTAACTACTAATGACTAACTATTACTGAA
>Marker155500	TTCAATTTATTATATTCATTTAGCACTTCCAAATGCTCTTGCAATAGTTTGTTATACTTTCTCTGCAGTGCCTCCATTGTTGCCCTACTAAACTTGACAAXXXXXXXXXXGGAAATATCTCACTTAGGGAGCAACATAATTCCACTCTGTCTAATCATGTGCCTACCCTCCTCAGGAGTGATGTCTTTAGCCTCAGCTTTCATCTGTGAT	TTCAATTTATTATATTCATTTAGCACTTCCAAATGCTCTTGCAGTAGTTTGTTATACTTTCTCTGCAGTGCCTCCATTGTTGCCCTACTAAACTTGACAAXXXXXXXXXXGGAAATATCTCACTTAGGGAGCAACATAATTCCACTCTCTATAATCATGTGCCTACCCTCCTCAGGAGTGATGTCTTTAGCCTCATCTTTCATCTGTGAT
>Marker60212	TCTAGCAGTATGATTATCAACAATTTACTTCTATTGTCAAAGCTGCACACATCTACAAAGATAGAGTGAAGGGATTAGCTTCCAGTGTGGAGGTGTCTTGXXXXXXXXXXACAATGTATTAACAAAACTTAATGTTGTTTACAATACACTTGCAATGCAAGATTCAATGGTCTTCGACACTCGTGTCTGGAGTCAAACTGGCAGCATAAC	TCTAGCAGTATGATTATCAACAATTTACTTCTATTGTCAAAGCTGCACACATCTACAAAGATAGAGTGAAGGGATTAGCTTCCAGTGTGGAGGTGTCTTGXXXXXXXXXXACAATGTATTAACAAATCTTAATGTTGTTTACAATACACTTGCAATGCAAGATTCAATGGTCTTCGACACTCGTGTCTGGAGTCAAACTGGCAGCATAAC
>Marker427369	CTATTTATCAAAGAATTCATAGGATAGAATCTAGAAGTCATTACAGATTGAGTTTGTGGCTATTTATCAAATGACACTCATACTATCACATGTGAATCACXXXXXXXXXXCATAAAGAAAAAAGGAATATTTTGACTGCAATCCACATATAGGATTCTACAATGCATCCATAGATTTTGATGCACACAAGTCCTATTTTAGTCAGCAAAT	CTATTTATCAAAGAATTCATAGGATAGAATCTAGAAGTCATTACAGATTGAGTTTGTGGCTATTTATCAAATGACACTCATACTATCACATGTGAATCACXXXXXXXXXXCATAAAGAAAAAAGGAATATTTTGATTGCAATCCACATATAGGATTCTACAATGCACCCATAGATTTTGATGCACACAAGTCCTATTTTAGTCAGCAAAT
>Marker15357	AAATTAAATGCTTTAGAAAATAATAAATAAAACCATGATATTTTAGTTGGAAATGATCTAACAAATGACAAAAAAATAACAATTTGCTAATAGCGTGGAAXXXXXXXXXXTAAACGTAATGCTGTGATCGCAAAATTTATATAATTGTATTTAAGCTAGTTAGAGATTTTAATAATCTAACGAGGCGTTAATAACTTTGAACTAGGACGC	AAATTAAATGCTTTAGAAAATAATAAATAAAATCATGATATTTTAGTTGGAAATGATCTAACAAATGACAAAAATAACAATTTGCTAATAGCGTGGAAATXXXXXXXXXXTAAACGTAATGCTGTGATCGCAAAATTTATATAATTGTATTTAAGCCAGTTAGAGATTTTAATAATCTAACGAGGCGTTAATAACTTTGAACTAGGACGC
>Marker85678	TTTCTTTCTTTTGAGGTTGGATTTGAGCAGTAAACTCAAGCAACTCTCAGTGGTTTTTTCCCTCATAGGGTTTCCACGTAAATCTGGTGTCATGTGTGTAXXXXXXXXXXACCAAGAAGCACGAGCACACCAACATGGGCATCTTCATCTAATATGAGAAAGAACAACAAGTGTAACAAGTGCCCTAGCAACAAACACAATATGCAACAA	TTTCTTTCTTTTGAGGTTGGATTTGAGCAGTAAACTCAAGCAACTCTCAGTGGTTTTTTCCCTCATAGGGTTTCCACGTAAATTTGGTGTCATGTGTGTAXXXXXXXXXXACCAAGAAGCACAAGCACACCAACATGGGCATCTTCATCTAATATGAGAAAGAACAACAAGTGCAACAAGTGCCCTAGCAACAAACACAATATGCAACAA
>Marker56671	AGGTTTTAACATTCCTCCTAACCCTTGACATGCCTTTATAGGCTTACAAACATGAAAACTTGAATGACTGTCCTATATGCCTCAACAAAGGCTTACATAAXXXXXXXXXXTCTTAAATCTTGTTGGGATGTTCGTCTAACTAGGAAACATGAACTCTCCAAGTGTGATCCTTCTCCTTCTCCAACCTGCATGGCTTCTGTAAACAATGTT	AGGTTTTAACATTCCTCCTAACCCTTGACATGCCTTTATAGGCTTACAAACATGAAAACTTTAATGACTGTCCTATATGCCTCAACAAAGGCTTACATAAXXXXXXXXXXTCTTAAATCTTGTTGGGATGTTCTTCTAACTAGGAAACATGAACTCTCCAAGTGTGATCCTTCTCCTTCTCCAACCTGCATGGCTTCTGTAAACAATGTT
>Marker67292	ATAATTCTATCATCTTGTGTAAAAATATATGTTGTAATTTAGTTGTTCACAGTTTATGCAGCTTGTCCTGGATTATTGCTTCTATTTCCATTATTCAGGGXXXXXXXXXXCAATCACAGCTGAACTTTTATTTGTGGAATTACCTGTCTTTAGTATGCATGGTAGCTTTGAGTCTTCATACTCCACTTGTGCACAACAACCATGCAATTA	ATAATTCTATCATCTTGTGTAAAAATATATGTTGTAATTTAGTTGTTCACAGTTTATGCAGCTTGTCCTGGATTATTGCTTCTATTTCCATTATTCAGGGXXXXXXXXXXCAATCACAGCTGAACTTTTATTTGTGGAATTACCTGTCTTTAGTATGCATGGTATCTTTGAGTCTTCATACTCCACTTGTGCACAACAACCATGCAATTA
>Marker160860	TTCGGGTGTGAGGTGAAGCCTTGGGCCTACGGCCGTGGGTCTTGGAATCCTTAATCCACCCTCTCGTATTAGGTGAGTGGTCTGATTAATGGGTAGGATTXXXXXXXXXXTCCTATTGAACCTTGTTGTTTCTGCAGATGCAAAACGGCCCAGGAAGAGGGAAGGAAAATAGGCCAGCACCTCACACGAACTCCCAACAACCTACAGATT	TTCGGGTGTGAGGTGAAGCCTTGGGCCTACGGCCGTGGGTCTTGGAATCCTTAATCCACCCTCTCGTATTAGGTGAGTGGTCTGATTAATGGGTAGGATTXXXXXXXXXXTCCTATTGAACCTTGTTGTTTCTGCAGATTCAAAACGGCCCAAGAAGAGGGAAGGAAAATAGGCCAGCACCTAACACGAACTCCCAACAACCTACAGATT
>Marker137170	GTTTTCACACACTATCAGTGTAACTTGGAATGATCAAATTGCATTCCTATCTACATTAGGAAATGAGTTTTATTTTATGGGTATTTGTCCATGTTTGAAGXXXXXXXXXXTTTTGCTGAGGTAAGCCTAAGGGCTGTGGTCTGGTGGCAAATTCTAGGGAGTTATATACCATCGTTGGCACAGACACATGTTAGCACATCTCTTCAAGAT	GTTTTCACACACTATCAGTGTAACTTGGAATGATCAAATTGCATTCCTATCTACATTGGGAAATGAGTTTTATTTTATGGGTATTTGTCCATGTTTGAAGXXXXXXXXXXTTTTGCTGAGGTAAGCCTAAGGGCTGTGGTCTGGTGGCAAATTCTAGGGAGTTATATACCATCGTTGGCACAGACACATGTTAGCACATCTCTTCAAGAT
>Marker58757	AATGTTTATATGCGCAGGAATGTTATATGTGCAACAGGACTGTTTAAATGCACAGCAATATGTTTCAAATGCGTTGAAATGGTATATGCACAGCAAGATGXXXXXXXXXXGTATGTTCAAGACTTGTAAAAAAGCCCAAGTTTTCATGGGTCTAACACAATTTGCAAACAAAACAAACACTTTTTATCCCTAAAGACAGGGCTTCATTAC	AATGTTTATATGCGCAGGAATGTTATATGTGCAACAGGACTGTTTAAATGCACAGCAATATGTTTCAAATGCGTTGAAATGGTATATACACAGCAAGATGXXXXXXXXXXGTATGTTCAAGACTTGTAAAAAAGCCCAAGTTTTCATGGGTCTAACACAATTTGCAAACAAAACAAACACTTTTTATCCCTAAAGACAGGGCTTCATTAC
>Marker144815	CCCACCTAGGCATATTAAAGCCTAAAGAGCAAGGAATTCTAACCATCTTGGTTGATTCCTTTCATTGGCCATATCACTTGTTGAACCTGATCATATGGCTXXXXXXXXXXTGATATCTAAGATCTCCTAAAACATGTCACCATCAATAGTAGAACCAATCAATCCTAGGACATGATCATTCTTGTAATCCTATGCTTGTTTCTGATATGG	CCCACCTAGGCATATTAAAGCCTAAAGAGCAAGGAATTCTAACCATCTTGGTTGATTCCTTTCATTGGCCATATCACTTGTTGAACCTGATCATAAGGCTXXXXXXXXXXATGATATCTAAGATCTCCTAAAACATGTCACCATCAATAGTAGAACCAATCAATCCTAGTAATGATCATTCTTGTAATCCTATGCTTGTTTCTGATATGG
>Marker41653	GTTCACACTAGATTTGCTTCAAAAATTAGAGAACGAAGTCGCTAGGTATATGTTATAACCTCAAAAGGTCAAAAACATTATTGTCTATACCAAAACAACAXXXXXXXXXXTACTGTATAAACTGAAACTAAATTGAAAATTTATCCTAAAAGGGGTGATGAACCAATATTTTAACTTAAATCTGCAATATATGACGCATAAACACTTTCT	GTTCACACTAGATTTGCTTAAAAAATTAGAGAATGGAGTCGCTAGGTATATGTTATAACCTCAAAAGGTCAAAAACATTATTGTCTATACCAAAACAACAXXXXXXXXXXTACTGTATAAACTGAAACTAAATTGAAAATTTATCCTAAAGGGGGTGATGAACCAATATTTTAACTTAAATCTGCAATATATGACGCATAAACACTTTCT
>Marker251518	ATTCTTCCACTATTCATCTGATTTTAAATTCCACTTGTCCTCTCCTCCCAATCTTAAATTCTTCACAAAATCCAAACCATACCTTTTCATAAATAAAGCCXXXXXXXXXXTAGATTGCAATGAAATTCTGCCACATTGAGCACTCACATATAACTAAATTAGCATATGATTATATCATTAGGGTAAATCAATAGAATTGCATATAGATAG	ATTCTTCCACTATTCATCTAATTTTAAATTCCACTTGTCCTCTCCTCCCAATCTTAAATTCTTCACAAAACCCAAACCATACCTTTTCATAAATAAAGCCXXXXXXXXXXTAGATTGCAATGAAATTCTGCCACATTGAGCACTCACATATAACTAAATTAGCATATGATTATATCATTAGGGTAAATCAATAGAATTGCATATAGATAG
>Marker278303	TTCGTGTAGGCTTCTATCTTTAAAAGATGGGTATACTAGTGGCGGGGAACTATTCTAAAGATACAAAATTCAAAATAAATGAAATAATTTAATGTGATCGXXXXXXXXXXAGCCAATGATTACAGAGCATATATAACTAAAATGCTCAAAAAACATACAAAGATCTTCATAATCATATATAATAGTATAATTACTAACTATTTTTATAAT	TTCGTGTAGGCTTCTATCTTTAAAAGATGGGTATACTAGTGGCAGGGAACTATTCTAAAGATACAAAATTCAAAATAAATGAAATAATTTAATGTGATCGXXXXXXXXXXAGCCAATGATTACAGAGCATATATAACTAAAATGCTCAAAAAACATACAAAGATCTTCATAATCATATATAATAGTATAATTACTAACTATTTTTATAAT
>Marker196690	GATATTTATGGATCTGATGTTGTGTCATTAGATGGTGCCAACATTAAGGAAAATAAATGTCAAATGCAATTTAATTTTTTCTGCTTCCCAGATCAGATAGXXXXXXXXXXTGAAACACGAAAATATGGGCTTTACTTTTTCTGTTGGCCTTGTGCCATCATCCATGGTGTGGTTCTTCAAACCATACCAATTTAGGGCAAAAAGGAAGGT	GATATTTATGGATCTGATGTTGTGTCATTAGATGGTGCCAACATTAAGGAAAATAAATGTCAAATGCAGTTTAATTTTTTCTGCTTCCCAGATCAGATAGXXXXXXXXXXATGACACGAAAAATATGGGCTTTACTTTTTCTGGTGGCCTTGTGCCATCATCCATGGTGTGGTTCTTCAAACCATACTAGTCTAGGGCAAAAAGGAAGGT
>Marker233583	GGTTTAGAATCATATAGTTGCACTTGTTAACTCACACTTCAATTTCTAACGGGAAAGTAAATGGATGCTCATGCAAATCTCACATAATTTTAACTAGGAAXXXXXXXXXXTATCTGGGCTAAAATTGAACACATCATTGCTATCTTGGTAAAACTGGACCATTGCTATCTGTAGACACCGAAAATTGGATTGCTCTGCAAACCAATTTCC	GGTTTAGAATCATATAGTTGCACTTGTTAACTCACACTTCAATTTCTAACAGGAAAGTAAATGGATGCTCATGCAAATCTCACATAATTTTAACTAGGAAXXXXXXXXXXTATCTGGGCTAAAATTGAACACATCATTGCTATCTTGGTAAAACTGGACCATTGCTATCTGTAGACACCGAAAATTGGATTGCTCTGCAAACCAATTTCC
>Marker339072	ATAGAGTCAAATAATGAAGGGTTTCTAGAGATACAAACTCGCTTCAAGGATGAAACCAACTCTCTCAAAGGTCTCTTCCATTGGCAAATGGAAGATTATGXXXXXXXXXXGGTTGTAAATGACTGGGATCTAGTATTGAAGGCAGCTGCATTTGGAATCAATATAAGATTATAAGGATGTATTTGCCTAGATATATAAAGACCTAATAGA	ATAGAGTCAAATAATGAAGGGTTTCTAGAGATACAAACTCGCTTCAAGGATGAAACCAACTCTCTCAAAGGTCTCTTCCATTGGCAAATGGAAGATTATGXXXXXXXXXXGGTTGTAAATGACCGGGATCTAGTATTGAAGGCAGCTGCATTTGGAATCAATATAAGATTATAAGGATGTATTTGCCTAGATATATAAAGACCTAATAGA
>Marker64233	TCCACTAAACACTTTTGTTTTGGGGGCTCTAATACTAATTTAGCAGGCTATGTGGACTCAGATTTGGTAGGGGATATTAATACTAGGTGGAGCACTATAGXXXXXXXXXXTACAGTTGAGATATCACTTCATTAGATCATTGTTGGATGATGGACAGTTAAGGCTAGAAAAGATACATACAAATGAAAATCCAACCAATATGTTTACAAA	TCCACTAAACACTTTTGTTTTGGGGGCTCTAATACTAATTTAGCAGGCTATGTGGACTCAGATTTGGTAGGGGATATTGATACCAGGTGGAGCACTATAGXXXXXXXXXXTACAGTTGAGATATCACTTCATTAGATCGTTGTTGGATGATGGACAGTTAAGGCTAGAAAAGATACATACAAATGAAAATCCAACCAATATGTTTACAAA																								TCCACTAAACACTTTTGTTTTGGGGGCTCTAATACTAATTTAGCAGGCTATGTGGACTCAGATTTGGTAGGGGATATTGATACCAGGTGGAGCACTATAGXXXXXXXXXXTACAGTTGAGGTATCACTTCATTAGATCGTTGTTGGATGATGGACAGTTAAGGCTAGAAAAGATACATACAAATGAAAATCCAACCAATATGTTTACAAA
>Marker420786	TGTTCCTCTAATTCTGGTTGAGGGAAAGCATAAAAGAATGCATCTTTTCCCACCAAAATATGTGAAGAATTCAAGCTTTCTTACACTGCCTAATAATAATXXXXXXXXXXGAATTTTGCAAATGAGCTAGACAGAAGGCATTGTGAATATTCCATTCAAGGCCATACAAGTTTGGTTAACAAGGTTGAACTTGATCGGGCCAATTTTTCT	TGTTCCTCTAATTCTGGTTGAGGGAAAGCATAAAAGAATGCATCTTTTCCCACCAAAATATGTGAAGAATTCAAGCTTTCTTACACTGCCTAATAATAATXXXXXXXXXXGAATTTTGCAAATGAGCTAGACAGAAGGCATTGTGAATATTCCATTCAAGGCCATACAAGTTTGGTTAACAAGGTTGAACTTGATCAGGCCAATTTTTCT
>Marker88291	GGTCTTATTTCAATTCATCATTTAAAACCCCTTTATTAGTTAAGCACAGTAATAAAATTTACCTTGATATTGCTTATACAATTTATACCAACCATCCATCXXXXXXXXXXTAACATTACGTATTTGAGGTAGTGTAGAGGAATGTTAGGACAATCTAAATCTAAGATGTCAGCCTCCGGTGACGAGGGGATTAAAAGTTATGAGCATCTG	GGTCTTATTTCAATTCATCATTTAAAACCCCTTTATTAGTTAAGCACAGTAATAAAATTTACCTTGATATTGCTTATACAATTTATACCAACCATCCATCXXXXXXXXXXTAACATTACATATTTGAGGTAGTGTAGAGGAATGTTAGGACAATCTAAATCTAAGATGTCAGCCTCCGGTGACGAGGGGATTAAAAGTTATGAGCATCTG
>Marker87276	ATCCTCACTGTGGAATCACTCCACCACTGCAGTCAACAACCCGTGGTTCATGTGAACCTCAAGCATGAAACAAACGTAATGAAGACCCATAGCACCAAGAXXXXXXXXXXTAGTGCAAATGGGCTGATCTAGGTGGCAAATGTGCCGATCCATATCATATGCACCGCTTCACCATGAATGCACTAATCCTTGATGTGTATGCACTGTTCT	ATCCTCACTGTGGAATCACTCCACCACTGCAGTCAACAACCCGCGGTTCATGTGAACCTCAAGCATGAAACAAACGTAATGAAGACCCATAGCACCAAGAXXXXXXXXXXTAGTGCAAATGGGCTGATCTAGGTGGCAAATGTGCCGATCCATATCATATGCACCGCTTCACCATGAATGCACTAATCCTTGATGTGTATGCACTGTTCT
>Marker25321	CATTGAGGACATTAGTGTTCTCTTCGATGATAGTTTGAATGAAATTGCATCTCCATTATCCTCTTCAGATATTCATGCTCTACATCATCCTACACATGGTXXXXXXXXXXTGTTGGATCTACATCTGCATCCTTTGTCAACTATCCAACCTCACTGCAGCAGGACATGTATTATGGGGGGTTTCATATACCTTCTCGAGGAATCCTCTAT	CATTGAGGACATTAGTGTTCTCTTCGATGATAGTTTGAATGAAATTGCATCTCCATTATCCTCTTCGGATATTCATGCTCTACATCATCCTACACATGGTXXXXXXXXXXTGTTGGATCTACATCTGCATCCTTTGTCAACTATCCAACCTCACTGCAACAGGACATGTATTATGGGGGGTTTCATAGACCTTCTCAAGGAATCCTCTAT
>Marker553257	AGTCTTGACTAGGTCTGCAACAGCATGAAGGGATGTTAACAGTCCATTATCTAGACTTGGGAGGCCATATAGCAGTAGTAGATGACTGAATTTCATCAAAXXXXXXXXXXTGGTTTTTTGTTCAAAATAATTTTACTAGTGTTGTAGCTAACTAGTTTGTCAATATTCCCTTTGTAGTGAAATTTGCATTTTAATTGTAATTTGGATGGT	AGTCTTGACTAGGTCTGCAACAACATGAAGGGACATTAACAGTCCATTATCTAGTCTTGGGAGGCCATATAGCAGTAGTAGATGACTGAATTTCATCAAAXXXXXXXXXXTGGTTTTTTGTTCAGAATAATTTTACTAGTGTTGTAGCTAACTAGTTTGTCAATATTCCCTTTGTAGTGAAATTTGCATTTTAATTGTAATTTGGATGGT
>Marker445965	AGAAATTATAACCACATCACCCTTATTATGGTATGGTTTTCTATCTTCTTAACTCACTCACTTTGCTAAGATGGTATCTATCTCTATGGCAGGTTGTGAAXXXXXXXXXXAGAGAATATTCTTTTGCATGACTAGTGGCTAAATGCTACTGGAAACATGTATAGTGATAAAGCAACTTAGCCGATCTGATTTTTACTACTTACGATTATG	AGAAATTATAACCACATCACCCTTATTATGGTATGGTTTTCTATCTTCTTAACTCACTCACTTTGCTAAGATGGTATCTATCTCTATGGCAGGTTGTGAAXXXXXXXXXXAGAGAATATTCTTTTGCATGACTAGTGGCTAAATGCTACTGGAAACATGTATAGTGATAAAGCAACTTAGCCGGTCTGATTTTTACTACTTACGATTATG
>Marker274928	TCATTCTTGACAAATTCCACTGATCAAACACCTCCACACACTTCACTTTGACTCAAATCATCACTTCCTCTACACAACAAACATTGTTGCCTTGAACATAXXXXXXXXXXATGCTAGATCACACTTTCAAACATTAGGTGTAATTATCAAAATATTTCAAGTCGACCTAGCAACACTTATTCTTCCACAAATTAGCTCCAAACCAAAAAA	TCATTCTTGACAAATTCCACTGATCAAACACCTCCACACACTTCACTTTGACTCAAATCATCACTTCCTTTACACAACAAACATTGTTACCTTGAACATAXXXXXXXXXXATGCTAGATCACACTTTCAAACATTAGGTGTAATTATCAAAATATTTCAAGTCAACCTAGTAACACTTATTCTTCCACAAATTAGCTCCAAACCAAAAAA
>Marker268378	TTATCCTAGGCAACTAAAGGATTCTTTTTGTGATCCTCAATGCCTTGCTAAACAAAATTTATCATTATCTTCTCTAGATTTTTGATTATTCCAGCTAGGGXXXXXXXXXXTTTAGATTTGTTATCATTTATTAATCACTTAGAAGCCTTGGAATAAGACTCCAAAATGTCCTTCAAAGCATAATCTTCATAGAGGGAAGCATCTCCAAAG	TTATCCTAGGCAACTAAAGGATTCTTTTTGTGATCCTCAATGCCTTGCCAAACAAAATTTATCATTATCTTCTCTAGATTTTTGATTATTCCAGCTAGGGXXXXXXXXXXTTTAGATTTGTTATCATTTATTAATCACTTAGAAGCCTTGGAATAAGACTCCAAAATGTCCTTCAAAGCATAATTTTCACAGAGGGAAGCATCTCCAAAG
>Marker34195	AGTGGCAGTGCTTTCTATTTAGGAAGTAAATTGGTTTCATGGTAGAGCAAGAAACAAGATTTAGTATCATTATCAACTGTAGAGGTAGAGTATATTGAAGXXXXXXXXXXGCAAACATTTTCACAAAGGCTCTTGCAAAGGACACTTCTGAGTATCTGTAGCAAAAGTTAGGGGTAATTACCCCTCCCTCTTCTTGCTAGATGCATAGTT	AGTGGCAGTGCTTTCTATTTAGGAAGTAAATTGGTTTCATGGTAGAGCAAGAAACAAGATTTAGTATCATTATCAACTGCAGAGGTAGAGTATATTGAAGXXXXXXXXXXGCAAACATTTTCACAAAGGCTCTTGCAAAGGACACTTCTGAGTATCTCTAGCAAAAGTTAGGGGTAATTACCCCTCCCTCTTCTTGCTAGATGCATAGTT
>Marker298909	AAACTTCAAAAAATATTGGGCTCAAATGCACATATACTATCTCAACCATTGGAACTATCTCACCTATTGGGTCTTTTCCCCTATAACTTCGCTGTTTTTGXXXXXXXXXXCATTTCCATTTCCATTGAAGAAAATGACTATTTTTGTCCTCTTATTGTAAATTAAGTAAGATTAATGCTCTTAACGAAGTCCAACTGAATTACAGTAGAG	AAACTTCAAAAAATATTGGGCTCAAATGCACATATACTATCTCAACCATTGGAACTATCTCACCTATTGGGTCTTTTCCCCTATAACTTCGCTGTTTTTGXXXXXXXXXXCATTTTCATTTCCATTGAAGAAAATGACTATTTCTGTCCTCTTATTGTAAATTAAGTAAGGTTAATGCTCTTAACGAAGTCCAACTGAATTACAGTAGAG
>Marker83255	ACCCTAACAATCCTAGTTAGATCTCTACAACCTTTAAGGACACACACCTTCTTATTGATGTCTCTACCTTCCTTAATAAATTCTAAATATTATTAAAGGAXXXXXXXXXXTAGATGCCAGATATGCCACAAACATCAATTACAATTATTTTGAAAGTAGGGTGGCTGTCTGATGAGGAATTCGATGAGTGGACAAAAATATTTGCAAAAG	ACCCTAACAATCCTAGTTAGATCTCTACAACCTTTAAGGACACACACCTTCTTATTGATGTCTCTACCTTCCTTAATAAATTCTAAATATTATTAAAGGAXXXXXXXXXXTAGATGCCAAATATGCCACAAACATCAATTACAATTATTTTGAATGTAGGGTGGCTGTCTGATGAGGAATTCGATGAGTGGACAAAAATATTTGCAAAAG
>Marker36496	CTTATGGTAACCGGATGCAAGTTGAGTAAAGATGATGATTGTTGGAGTCTGAGATAGGGGGGGTAATCAGTATTGTGTAAAAACACAATTTTTACAACTTXXXXXXXXXXTTGTGATTGCCTCACTGACTTACAGAAAGTCTCACTGACTTCTCACAAACACTTTGGTTGCACATACAAATCTTTTCAGGGGATTACCTTGTTTCAATCA	CTTATGGTAACCAGATGCAAGTTGAGTAAAGATGATGATTGTTGGAGTCTGAGATAGGGGGGGTAATCAGTATTGTGTAAAAACACAATTTTTACAACTTXXXXXXXXXXTTGTGATTGCCTCACTGACTTACAGAAAGTCTCACTGACTTCTCACAAACACTTTGGTTGCACATACAAATCTTTTCAGGGGATTACCTTGTTTCAATCA
>Marker410891	CTTGTTTATCAAGGAAAAATGAGACTCAACTAAGCCTTTTATCAAACCCTAGGTTAAGTATGAGTAAAACCCTAGTTATGAGACAATCAACTTGAAACAAXXXXXXXXXXACCATGCAAGTCTCTCTAGAGAGATAATCCAAAACTATTCCTAGATCCTGAAACTGTAGTTCCTACACTACCTTCCTATAGCTCCACTTTTCCTGAAACC	CTTGTTTATCAAGGAAAAATGAGACTCAACTAAGCCTTTTATCAAACCCTAGGTTAAGTATGAGTAAAACCCTAGTTATGAGACAATCAACTTGAAACAAXXXXXXXXXXACCATGCAAGTCTCTCTAGAGAGATAATCCAAAACTATTCCCAGATCTTGAAACTGTAGTTCCTACACTACCTTCCTATAGCTCCACTTTTCCTGAAACC
>Marker159127	ACAATTACACAGAACCATACACTGTTACTAGAAACTTTTAACCATCTTGAACTTCAATTTGAAAAATAGCATATTCAAAGAATTATCCAACTGCTTAAAAXXXXXXXXXXAGCAAGTTGAAACATCCATTTATAAGGTCTAAAATTCATAAAGAAAAAAAGAATAGATATTCAGAACCAAGTAAGCATCCCTAACAGCACCAAAAGAATA	ACAATTACACAGAACCATACACTGTTACTAGAAACTTTTGACCATCTTGAACTTCAATTTGAAAAATAGCATATTCAAAGAATTATCCAACTGCTTAAAAXXXXXXXXXXAGCAAGTTGAAACATCCATTTATAAGGTCTAAAATTCATAAAGAAAAAAAGAATAGATATTCAGAACCAAGTAAGCATCCCTAACAGCACCAAAAGAATA
>Marker277262	TTGAACTCACAAATTTTAGTTCAACATCATACATAAATAAGGATATGTTTTGTCCATACACCCTTTGGCACATACCATACACATATTAAAAGTAAAAGTAXXXXXXXXXXAATGTCCATAATTCTCAATACTTATTTTTGGTTTCTTCTTCAATTTGGGGGAACATGAGTATGAAAAACAATAAATTACTAATCTATTTAAGTGAAAACA	TTGAACTCACAAATTTTAGTTCAACATCATACATAAATAAGGATATGTTTTGTCCATACACCCTTTGGCACATACCATACACATATTAAAAGTAAAAGTAXXXXXXXXXXAATGTCCATAATTCTCAATACTTATTTTTGGTTTCCTCTTCAATTTGGGGGAACATGAGTATGAAAAACAATAAATTACTAATCTATTTAAGTGAAAACA
>Marker123879	GTTGTTAAGACAGTAGGTGTCTTTAAAGGTTTGGAACTCACTTTACATGCATGCCCTGGCTGATCTGTTTCACAAGATATCTCAATCATAGACCTCCCAAXXXXXXXXXXGGCTGCAACAACAGTAGAGGAGATCCCTAATATACTACTGGATGAGTGGGCTAATTGCTTTCAGTTTGACACTCCTAATCACATAGAGAATACAGGGTTG	GTTGTTAAGACAGTAGGTGTCTTTAAAGGTTTGGAACTCACTTTACATGCATGCCCTGGCTGATCTGTTTCACAAGATATCTCAATCATAGACCTCCCAAXXXXXXXXXXGGCTGCAACAACAGTAGAGGAGATCCCTAATATACTAATGGATGAGTGGGCTAATTGCTTTCAGTTTGACACTCCTAATCACATAGAGAATACAGGGTTG
>Marker210848	CTACTATCACAAAAAACAAGATCAAGGAAACTTGGAGCCTCAAAACAATACAAATCCATAAATGGTGACATTCCAATAAACATGTGACACATAGTATTATXXXXXXXXXXTGGCATTTAGTTTGAGGTGGCATTGTCACATGTCATCCTACTTGTAATATGCTTTGGATAGTCAAGTCAAACATGTGGATTTGGGCGTCCCATTTGAGGT	CTACTATCACAAAAAACAAGATCAATGAAACTTGGAGCCTCAAAACAATACAAATCCATAAATGGTGACATTCCAATAAACATGTGACACATAGTATTATXXXXXXXXXXTGGCATTTAGTTTGAGGTGGCATTGTCACATGTCATCCTACTTGTAATATGCTTTGGATAGTCAAGTCAAACACGTGGATTTGGGTGTCCCATTTGAGGT
>Marker279115	TGTGGTGAGTTGTCATTCCATTTTGGCAAACGAGTGGGTGATTTCTTGCCAGAGATTTTGGGTCATGAGTATTCTGTGGTTTTTTAATCTATGGGAGAAAXXXXXXXXXXGAGACACCAAATTGACATTTCTGCATGCTATAAATGTGTAGGAAGAAGGCTTCCTCAAGAAACTGGAGCTACAACATTTTGGCATCTTGTTATTCTGAAG	TGTGGTGAGTTGTCATTCCATTTTGGCAAACGAGTGGGTGATTTCTTGCCAGAGATTTTGGGTCATGAGTATTCTGTGGTTTTTTAATCTATGGGAGAAAXXXXXXXXXXGAGACACCAAATTGACATTTCTGCATGCCATAAATGTGTAGGAAGAAGGCTTCCTCAAGAAACTGGAGCTACAACATTTTGGCATCTTGTTATTCTGAAG
>Marker114868	ACTACCTATACTAGTGGAGCTTGTTGTCACCTCCTCCTCACCAGCCTCTCCATCCCAATCTCCCCTATTTCCCCAGGCCTTGTCAACCAAGTCAGCCTAGXXXXXXXXXXTGCCTAGCATAGACAAGCTCCGCATCCTCTTCCTCCCATCTCTCACAACCTAGCCATGGCCTCCATATAAACATATCGGCCTCATCTAGAGCCTGCCTCC	AGTGGAGCTTGTTGTCACCTCCTCCTCACCAGCCTCTCCATCCCAATCTCCCCTATTTCCCCAGGCCTTGTCAACCAAGTCAGCCTAGCTGTGGCCCAGTXXXXXXXXXXTGCCTAGCATAGACAAGCTCCGCATCCTCTTCCTCCCATCTCTCACAACCTAGCCATGGCCTCCATATAAACATATCAGCCTCATCTAGAGCCTGCCTCC
>Marker245679	AAAGATCTCTCACAAATGGAGAAAAGGAGAAAACCTCATGGGAAAAAACTCCTCCCCAAAAGATAGAAAAAACCTCCCTACAATATAGAGGGAGAGAGAGXXXXXXXXXXATATGGCACATCAAAAGGTAATAATAGTCTGAAAAACTCTGATCAATTTGAAGAAGAGAGAAGGTCACCTCCAAAGTGAAACCAAGGAAGCATTAGCACA	AAAGATCTCTCACAAATGGAGAAAAGGAGAAAACCTCATGGGAAAAAACTCCTCCCCAAAAGAGAGAAAAAACCTCCCTACAATATAGAGGGAGAGAGAGXXXXXXXXXXATATGGCACATCAAAAGGTAATAATAGTCTGAAAAACTCTGATCAATTTGAAGAAGAGAGAAGGTCACCTCCAAAGTGAAACCAAGGAAGCATTAGCACA
>Marker64268	TCTCTCCAAAGCATCTGTTTATATAATAAATACAAGGCAAAAATGGCTCCTCATTGGGATGGGCGTCCAACATGGCCTCATGGCCCAAAACCCACGCCTAXXXXXXXXXXTTCGACACATGTCTTCACCTGTCATAGAATCTCCTATTTATGACTCTTACATGTCATAACTTTGTCATAGGAATCTGTCATGACCGTTGACAAGGGTCAT	TCTCCTCTCCAAAGCACCTGTTTATATAATAAATACAAGGCACAAATGGCTCCTCATTGGGATGGGCGTCCAACATGGCCTCATGGCCCAAAACCCATGCXXXXXXXXXXTTCGACACATGTCTTCACCTGTCATAGAATCTCCTATTTATGACTCTTACATGTCATAACTTTGTCATAGGAATCTATCATGACCGTTGACAAGGGTCAT
>Marker176305	AAAATGTCCTCACAAGTGGGAACAACTTTAGGGGAGGGATCCAAATCATAGGGTGGAATAGACAAAGCTAGGTCACCATCACATGTATTAGAGTCTAGATXXXXXXXXXXTCAAGATCTTTGATATAAGCATGCAAAGAAACCAAAGAGAAATGACATGGAGATGCCATAATGAAATGTCTTGTAACAACAATATACAATTGATTTATCA	AAAATGTCCTCACAAGTGGGAACAAATTTAGGGGAGGGATCCAAATCATAGGGTGGAATAGACAAAGCTAGGTCACCATCACATGTATTAGAGTCTAGATXXXXXXXXXXTCAAGATCTTTGATATAAGCATGCAAAGAAACCAAAGAGAAATGACATGGAGATGCCATAATGAAATGTCTTGTAACAACAATATACAATTGATTTATCA
>Marker112751	GTTCCATTAATAGCTCAGTATACAGACTCAAATGTCTTCATAATGTTTGTTCTGCTTTTCTGCTCTATTTTACATATGCTCTGCCCTTCTACTTTTACTAXXXXXXXXXXCATATAGGTTAAGATCAATCATGCAACCACTTAGATTGATTATTCAAACAATATATCTTTTCCGCATATAGATCTAACATGCATGTCGACTTGTCCCTTA	GTTCCATTAATAGCTCAGTATACAGACTCAAATGTCTTCATAATGTTTGTTCTGCTTTTCTGCTCTATTTTACATATGCTCTACCCTTCTACTTTTACTAXXXXXXXXXXTATATAGGTCAAGATCAATCATGCAACCACTTAGATTGATTATTCAAACAATATATCTTTTCCGCATATAGATCTAACATGCATGTCGACTTGTCCCTTA
>Marker211639	AGCATTTTAGAGTTATGATTGGATGTTTAGTATATGTTTATAGATGTTAATTTTGTGGAAAATAAATGCTTCCTATAAGAAATAACCTAAGGTAAATATAXXXXXXXXXXTTTCTCTACTTTGGGTCATTTACTTGCTACAAAAATGACCTTGACACTTACAAATTTGAACCTAATATGTAGACTCACCCCTTAACTACAAAAAAACTTA	AGCATTTTAGAGTTATGATTGGATGTTTAGTATATGTTTATAGATGTTAATTTTGTGGAAAATAAATGTTTCCTATAAGAAATAACCTAAGGTAAATATAXXXXXXXXXXTTTCTCTACTTTGGGTCATTTACTTGCTACAAAAATGACCTTGACACTTACAAATTTGAACCTAATATGTAGACTCACCCCTTAACTACAAAAAAACTTA
>Marker119683	TCATCTATGGCATACACTTCTTTCCTTAAAGGATCAAGAGTGTGCCTAGGCCCACCTCCTCTATCATTAGGGGGAACTAGTTTCCCATCTTGCCAATTTGXXXXXXXXXXCTATTATTCTTAATATGTAAAGATGCTCTAAAAGCATCCTTGAGAGTTTGTGGTTCTCTATTTCTCAAGTCATACCCCATCTTGGGATCATAAGCATTTT	TCATCTATGGCATACACTTCTTTCCTTAAAGGATCAAGAGTATGCCTAGGCCCACCTCCTCTATCATTAGGGGGAACTAGTTTGCCATCTTGCCAATTTGXXXXXXXXXXCTATTATTCTCAATATGTAAAGATGCTCTAAAAGCATCCTTGAGAGTTTGTGGTTCTCTATTTCTCAAGTCATACCCCGTCTTGGGATCATAAGCATTTT
>Marker215820	GAATTCTTGGATCAAATTTTTACATGCCTATGCATTTTCATGGCTCCAGGAGATGATTTGATCAGTTTTAAAAAGTGATTCTGGATGCTACTTGACCTATXXXXXXXXXXGTTTGTTCCAACGAACTGGACACTTGATACAAGTGTGACAAGACCACCTCCTCTATTGAGTGAAGCTGACTTGTTAGGTTGTATTTATAAGGTAGGCATT	GAATTCTTGGATCAAATTTTTACATGCCTATGCATTTTCATGGCTCCAGGAGATGATTTGATCAGTTTTAAAAAGTGATTCTGGATGCTACTTGACCTATXXXXXXXXXXGTTTGTTCCAACGAACTGGACACTTGATACAAGTGTGACAAGACCACCTCCTCTATTGAGCGAAGCTGACTTGTTAGGTTGTATTTATAAGGTAGGCATT
>Marker68909	AATCCTGATCAACATTGAAAACTTGCCAGTGACAAATATTGTTAGGGATAGAAGGTCTAGTCAATACCTCCACCTGTGAGATTCCTACTATTGTCGAGTCXXXXXXXXXXTTTCAATACTAAGAGAAGTGTCTCATATTCAGAAACATTATTGATGCATTCAAAGCTAAGTTTGAATAATGATCTATATGTTTTATCAGAAGGAGAAATG	AATCCTGATCAACATTGAAAACTTGCCAGTGACAAATATTTATAGGGATAGAAGGTCTAGTCAATACCTCCACCTGTGAGATTCCTACTATTGTCGAGTCXXXXXXXXXXTTTCAATACTAAGAGAAGTGTCTCATATTCAGAAACATTATTGATGCATTCAAAGCTAAGTTTGAATAATGATCTATATGTTTTATCAGAAGGAGAAATG
>Marker265766	ACTACTTTGTATTCATGCTTCATTCTTCATGGTGAAGACATTCACGATTAAAGTTGCTATCACAACTAGACATGCATCTTAGTATCAAAATAAATCATTAXXXXXXXXXXGTGCCCAGAGAAAAATAATCATGTGACACATAAGACAAATGGATAAAATTAAGCATGGAAGATGATTAAATATCACAAGAAAACTATGATAAATAGAGTT	ACTACTTTGTATTCATGCTTCATTCTTCATGGTGAAGACATTCACGATTAAAGTTGCTATCACAACTAGACATGCATCTTAGTATCAAAATAAATCATTAXXXXXXXXXXGTGCCCAGAGAAAAATAATCATGTGACACATAAGACAAAGGGATAAAATTAAGCATGGAAGATGATTAAATATCACAAGAAAACTATGATAAATAGAGTT
>Marker522681	TGATTTATTGTTCATTAGAATCTATAGCAGTAAGTTATGGTGCATGAGAATCTCTGTTAACTTTCAGTGGAGTTTTGGTAATGATATTGGTCATTATACCXXXXXXXXXXGATCTTCATGTTAATTGAAGAGGTGTTAAAATCTTGTTTTAGTGAGGACTCTTAGAGTTTTTGGTAAAGGTGTTATTGTTCTTCCTTTTGGAGAGGATGA	TGATTTATTGTTCATTAGAATCTATAGCAGTAAGTTATGGTGCATGAGAATCTCTGTTAACTTTCAGTGGAGTTTTGGTAATGATATTGGTCATTATACCXXXXXXXXXXGATCTTCATGTTAATTGAAGAGGTGTTAAAATCTTGTTTCAGTGAGGACTCTTAGAGTTTTTGGTAAAGGTGTTATTGTTCTTCCTTTTGGAGAGGATGA
>Marker166905	TTTGCTTTTGTAATAGCATACTCTTGCGCCTTTAGTTGTTCTTGCAGAGATACCTACTTAATTGTCTGGCTATCCAACTCTTCATTATATGCTTCAATTTXXXXXXXXXXCATTACATCTCTTCAATATATCTACTTCAAACCTTATGTCTTTGAACCAATTATCTAGTTGTGGTAACATTTGAGGTGTCAGGATATTCTTTGTCATAAG	TTTGCTTTCGTAATAGCATACTCTTGCGCCTTTAGTTGTTCTTGCAGAGATACCTACTTAATTGTCTGGCTATCCAACTCTTCATTATATGCTTCAATTTXXXXXXXXXXCATTACATCTCTTCAATATATCTACCTCAAACCTTATGTCTTTGAACCAATTATCTAGTTGTGGTAACATTTGAGGTGTCAGGATATTCTTTGTCATAAG
>Marker157270	TTGGTATTGTATCCGGAGATCATTGAAGACTATCTCCGGAGATGCACAAAATTGCTGTTCCTAGCATCTACACCTGTTGATTCAAAAAGAGAGAAGTTTCXXXXXXXXXXCGAAATGGGCATGTGAAGAACTTCCATTCCATGGCATTTTGTAATGTGGGTATTGCATATTTGAGATTATTGATGCCTTATAAATGAAATAGTCTTTGTG	TTGGTATTGTCTCCAGAGATCATTGAAGACTATCTCCGGAGATGCACAAAATTGCTGTTCCTAGCATCTACACCTGTTGATTCAAAAAGAGAGAAGTTTCXXXXXXXXXXCGAAATGGGCATGTGAAGAACTTCCATTCCATGGAATTTTGTAATGTGGGTATTGCATATTTGAGATTATTGATGCCTTATAAATGAAATAGTCTTTGTG
>Marker440640	AGTCGACAGGACTTTTGGCACTTGAGTAATTTGGACATGCTTAACATCGGTGACTCCATCATTAACCACATGTTTGTTCTTGGCCCAAGGTTTGAATTTAXXXXXXXXXXATTGCTTAGCATTACAAAGGTGTAGCATTGTGAGTTCATGTTCAACATTGTAGGAGAAATGAGAGACAAATTTTTAGGAAAAGTCAGCGAAAGTTGTGAC	AGTCGACAGGGCTTTTGGCACTTGAGTAATTTGGACATGCTTAACATCGGTGACTCCATCATTAACCACATGTTTGTTCTTGGCCCAAGGTTTGAATTTAXXXXXXXXXXATTGCTTAGCATTACAAAGGTGTAGCATTGTGAGTTCATGTTCAACATTGTAGGAGAAATGAGAGACAAATTTTTAGGAAAAGTCAGCGAAAGTTGTGAC
>Marker259074	TTGATTATCAAAGATAAATGTGTGATTTTATTATCCATGCTACATCATTCACATACATACATAGAGAACATACAATTCTATAGAAGTAAAATTGAAAATAXXXXXXXXXXTCTCTCCTAGAGCATCATAATGATCCCCCTAAGACATCTAATCTACTCAAATGTAAGGTTTTCTACCTTTGTCTAACTTGCTTGCATAACCACTTGTGAT	TTGATTATCAAAGATAAATGTGTGATTTTATTATCCATGCTACATCATTCACATACATACATAGAGAACATACAATTCTATAGAAGTAAAATTGAAAAAAXXXXXXXXXXTCTCTCCTAGAGCATCATAATGATCCCCCTAAGACATCTAATCTACTCAAATGTAAGGTTTTCTACCTTTGTCTAACTTGCTTGCATAACCACTTATGAT
>Marker457865	GATCATATTATTTTAAGATGGAAACATCATATAAATCTGGAAATGTAACCTAACACATGAATAGAAAATAATTGTGTGAATGATATAATTATATACCAATXXXXXXXXXXGTGTTAGTGTGCATGAGTTAAGTTATAGAAACAAATAAAATTAGCATTACTCTTTATTTTAACAAAATCACACAAAATATATTTGCAAGAAAATTGTTCT	GATCATATTATTTTAAGATGGAAACATCATATATATCTGGAAATGTAACCTAACACATGAATAGAAAATAATTGTGTGAATGATATAATTATATACCAATXXXXXXXXXXGTGTTAGTGTGCATGAGTTAAGTTATAGAAACAAATAAAATTAGCATTACTCTTTATTTTAACAAAATCACACAAAATATATTTGCAAGAAAATTGTTCT
>Marker324154	TCTTAATAAAGCTCCATTTTCTCCTAAGATTACACATTCACTACCATTGCTTTGGGAAAGCTATCAAGGGATGAAGGGAAATAACTCACTAGATCTTCAGXXXXXXXXXXACATAAGAGCAGAAACATAATCAACACACTTGACATCAAGATTTTGACAAGGAAACCCGGTTAAGGGAAAAACCACAGTGGGGGTTAACCCACAAATATT	TCTTAATAAAGCTCCATTTTCTCCTAAGATTACACATTCACTACCATTGCTTTGGGAAAGCTATCAAGGGATGAAGGGAAATAACTCACTAGATCTTCAGXXXXXXXXXXACATAAGAGCAAAAACATAATCAACACACTTGACATCAAGATTTTGACAAGGAAACCCAGTTAAGGGAAAAACCACAGTGGGGGTTAACCCACAAATATT
>Marker576298	TTTATGTAGAATACATCTTAAATTTAATGTTTTAATGCACAATTAAAAAAACTAATCTTTTATTAGAAATAGCTCTAGAATTATTATTAATAATAAAAACXXXXXXXXXXTATAGGAGTTAGAGGTTAGTTTATTATCATCATATTATGAATTGTGTTCTTATTGGAGACTTTTGGAGGTTTGTCCCCTCAAAGTGGCTTATTAATCTCA	TTTATGTAGAATACATCTTAAATTTAATGTTTTAATGCACAATTAAAAAAACTAATCTTTTATTAGAAATAGCTCTAGAATTACTATTAATAATAAAAACXXXXXXXXXXTATAGGAGTTAGAGGTTAGTTTATTATCATCATATTATGAATTGTGTTCTTATTGGAGACTTTTGGAGGTTTGTCCCCTCAAAGTGGCTTATTAATCTCA
>Marker219980	TTATCCTGTTTATTCTTTAGAGCAAACTTCATGTTTTCTTATTTTTGAGGTCTCTCACAAGGAATAAAGGACCTTTTCTTGCATCAGGTATTTAGAAATCXXXXXXXXXXATTATGTGTTTATGCATTCTTCGATTATTCTTATGAGCAAGGCCCATGGTTAGTGTCCTTTGCTTTAGTGTAATTTTAAGGATGTGTTGATGTGGAAACA	TTATCCTGTTTATTCTTTAGAGTAAACTTCATGTTTTCTTATTTTTGAGGTCTCTCACAAGGAATAAAGGACCTTTTCTTGCATCAGGTATTTAGAAATCXXXXXXXXXXATTATGTGTTTATGCATTCTTCGATTATTCTTATGAGCAAGGCCCATGGTTAGTGTCCTTTGCTTTAGTGTAATTTTAAGGATGTGTTGATGTGGAAACA
>Marker515710	GTTCCTCTATATCCTATCTATTTCATTATATTGTATCCAATACCATATATTTGTTTGAATGATTTCTTAGGAGGAGGTGATGATGATTTGTGAGATGTCTXXXXXXXXXXGTATCAATTTGATTATAATGGTAAAGTAGTCTTCAATCTATGTTAGCACAAAAAAATTTCCCCTTATACCAAATTTAACACATTGATACAATGTCTAGAG	GTTCCTCTATATCCTATCTATTTCATTATATTGTATCCAATACCATATATTTGTTTGAATGATTTCTTAGGAGGAGGTGATGATGATTTGTGAGATGTCTXXXXXXXXXXGTATCAATTTGATTATAATGGTAAAGTAGCTTTCAATCTATGTTAGCACAAAAAAATTTCCCCTTATACCAAATTTAACACATTGATACAATGTCTAGAG
>Marker369123	TTTCTAAGGAAGGACCATTTGACCTTATCATATAAGCCTTGGACATGCCAAGGTTGATAAACATAGCTTTATTTTTAGAGAAACCCATAGAATGAATGGCXXXXXXXXXXCTTTCTTCTATTTTGGTGGATTGACCATGTTGTTCCTTGGAGTAGGTTGATATTCTTACTTAGGGCTATGATCCTAAAGCAGTTTATTCAGTTTCTCTTT	TTTCTAAGGAAGGACCATTTGACCTTATCATATAAGCCTTGGACATGCCAAGGTTGATAAACATAGCTTTATTTTTAGAGAAACCCATAGAATGAATGGCXXXXXXXXXXCTTTATTCTATTTTGGTGGATTGACCATGTTGTTCCTTGGAGTAGGTTGATATTCTTACTTAGGGCTATGATCCTAAAGCAGTTTATTCAGTTTCTCTTT
>Marker182831	AGTTCTATAGTTAAGTCCTCCTCCATTTGGCAATGATTTGGCTTGGTCTTGTCCTTGAATGTTATTGTGGAAGAGGGTTTGATCTAGAGTGCACACTATTXXXXXXXXXXTTAGTGTATTTAGTGTTATAGGACTTTGTATGAGTTGTATAACCCACTGCCTTAATAAAAACACATCTTTCTACGAAGAAGTCATAGATTAATGGGTTCT	AGTTCTATAGTTAAGTCCTCCTCCATTTGGCAATGATTTGGCTTGGTCTTGTCCTTGAATGTTATTGTGGAAGAGGGTTTGATCTAGAGTGCACACTATTXXXXXXXXXXTTAGTGTATTTAGTGTTATAGGACTTTGTATGAGTTGTATAAACCACTGCCTTAATAAAAACACATCTTTCTACGAAGAAGTCATAGATTAATGGGTTCT
>Marker347460	AATGATACTGATCCAATTAGTATAACTAGTAAATGACATTCATCACCTTACCCTTCTCATCATAACTTCTCTAATCCATCTTCTTTGTCTTCTTCTCTGAXXXXXXXXXXTTGTAGTTTGTGATTAAACCTTGACATGGCCTCTTCTTCTAGCAATTGTTCTTTATTGACCTATCTTTATAGTCTCCTTACTGTTCTGCCCCCTCTGTTA	AATGATACTGATCCAATTAGTATAACTAGTAAATGACATTCATCACCTTACCCTTCTCATCATAACTTCTCTAATCCATCTTCTTTGTCTTCTTCTCTGAXXXXXXXXXXTTGTAGTTTGTGATTAAACCTTGACATGGCCTCTTCTTCTAGCAATTGTTCTTTATTGACCTATCTTTATAGTCTCCTTACTGTTCTACCCCCTTTGTTA
>Marker224675	TGGACTACAAGGCCCATAGCTGACTAATTCTGGCTCATACGCTCCTGTTGTTGGCTGAGTTGTTCTATCTGTTGCTCAGTCCAATTCTGCTTCTTCGTGAXXXXXXXXXXGAAACACTCAGATTGTATCCTTGAAATCCTCTATCAATGGAGGTAAAATCAGTTGGTAGTGGCAACTGCAGTGCTGGCAAATATTATTAAGAATTGGACA	TGGACTACAAGGCCCATAGCTGACTAATTCTGGCTCATACGCTCCTGTTGTTGGCTGAGTTGTTCTATCTGTTGCTCAGTCCAATTCTGCTTCTTCGTGAXXXXXXXXXXGAAACACTCAGATTGTATCCTTGAAATCCTCTATCAATGGAGGTAAAATCAGTTGGTAGTGGCAACTGCAGTGCTGGCAAATATTATTAAGAATCGGACA
>Marker464235	TAGAATGAATAAAGGATGGAACCTTAGATTCATCTCACTAGATGTGTTAGAAAACTATTGATGCTTAGATATTGTAACTACATGATGCATTAGCCAAGTGXXXXXXXXXXTTGGATGATGAAAGGATGGAATTGATATTTTCATGGTTATCAATATGCGCAAGGTGATCTGCTCATAAGAGATCAATAGATCCCAAACACAGAGATCAAG	TAGAATGAATAAAGGATGGAACCTTAGATTCATCTCACTAGATGTGTTAGAAAACTATTGATGCTTAGATATTGTAACTACATGATGCATTGGCCAAGTGXXXXXXXXXXTTGGATGATGAAAGGATGGAATTGATATTTTCATGGTTATCAATATGCGCAAGGTGATCTGCTCATAAGAGATCAATAGATCCCAAACACAGAGATCAAG
>Marker382383	ACCACTCATGAGCAATTCCTTCCAAGTGAAGTGTTGTAAACTTAATGGCTTCATCTTCCGCCATTGGTGTAAGTGACAAATAGGTATCCAATTTTTGAATXXXXXXXXXXCTCTACGGATGAAAGTAGGCTGAAATGGCCTAGCAACAGACCCAATAGCCGTTCTGGTGGTCTGATTTATGTTTTATGTGTGTTGATTTATAGCCCTTTA	ACCACTCATGAGCAATTCCTTCCAAGTGAAGTGTTGTAAACTTAATGGCTTCATCTTCCGCCATTGGTCTAAGTGACAAATAGGTATCCAATTTTTGAATXXXXXXXXXXCTCTACGGATGAAAGTAGGCTGAAATGGCCTAGCAACAGACCCAATAGCCGTTCTGGTGGTCTGATTTATGTTTTATGTGTGTTGATTTATAGCCCTTAA
>Marker192440	TACCTTTCACATGTAGACTACCATCCCCGAGGGGGCAAATATGTAAGCACTAAAAATGTGCATGGGCTTGCACGAGGACCCTACGATGAGTTGTAATCCTXXXXXXXXXXTAAATGACCTCCCAAATCAAACCTATCTTTCATAATTGACTTAACTATTATCATTTCCAGATCCACCTAATATTTATGGATCCCCTGTGGGTCCCCCTTG	TACCTTTCACATGTAGACTACCATCCCCGAGGGGGCAAATATGTAAGCACTAAAAATGTGCATGGGCTTGCACGAGGACCCTACGATGAGTTGTAATCCTXXXXXXXXXXTAAATGACCTCCCAAATCAAACCTATCTTTCATAATTGACTTAACTTTTATCATTTCCAGATCCACCTAATATTTATGGATCCCCTGTGGGTCCCCCTTG
>Marker471209	TGTTTATTCTTTTGCATGGTTGATTCTAAATACTTGTTTGCATATTTTTCTCTCTTTGGGTTATGTGAAAATGTTTTATATTGCTACAAATTTTTCCTTTXXXXXXXXXXCCTATAATTTGTTTCCCTTTCACAAATCGTCCTTGCTCCCCCAAATTGAGGATAGGCAATAGAATTTTTAGTTTGTTGGAAATCACTTTTGATATGAGTT	TGTTTATTCTTTTGCATGGTCGATTCTAAATACTTGTTTGCATATTTTTCTCTCTTTGGGTTATGTGAAAATGTTTTATATTGCTACAAATTTTTCCTTTXXXXXXXXXXCCTATAATTTGTTTCCCTTTCACAAATTGTCCTTGCTCCCCCAAATTGAGGATAGGCAATAGAATTTTTAGTTTGTTGGAAATCACTTTTGATATGAGTT
>Marker369971	TATCTATACATATATGTGACCTAGAGATCTTTCACCTCTTTCCCTTTTCTACCTTAAAATCAATTGCATACTCTTGGTTTATACAATTATTTTAAGGGAGXXXXXXXXXXCAACGTTTGCTAGTGTTTATGATTCATGAAGGTATTGTATGGCTCCTAGCAATAATGCATGCTAGACCTTGAACCATACCCCACATTCTCCTAACAAAAA	TATCTATACATATATGTGACCTAGAGATCTTTCACCTCTTCCCCTTTTCTACCTTAAAATCAATTGCATACTCTTGGTTTATACAATTATTTTAAGGGAGXXXXXXXXXXCAACGTTTGCTAGTGTTTATGATTCATGAAGGTATTGTATGGCTCCTAGCAATAATGCATGCTAGACCTTGAACCATACCCCACATTCTCCTAACAAAAA
>Marker332355	AAAGGATCTTAAGCCTAGAAGAAAGGGTCAACTTTTCTTTGATGCACACAAAACCACAACAAGAATCATTCATTACAAAGGCTTCAAAATAACACACATGXXXXXXXXXXTCTCTCAGTCCCTAGCTTGTAACCTAGGAGGTTATATTCAATAAATTCTGAATATATAGTAATCTGACAAGTTGTTGAAAGCTTCAGTGTTGTATCTCTT	AAAGGATCTTAAGCCTAGAAGAAAGGGTCAACTTTTCTTTGATGCACACAAAACCACAACAAGAATCATTCATTACAAAGGCTTCAAAATAACACACATGXXXXXXXXXXTCTCTCAGTCCCTAGCTTGTAACCTAGGAGGTTATATTCCATAAATTCTGAATATATAGTAATCTGACAAGTTGTTGAAAGCTTCAGTGTTGTATCTCTT
>Marker178589	CCACCTATGACAAGGATTTCTATGCTATTGTGCAAGCCTGCAAACAATCAAAACACTACATTTTGGGGAAGAAGACTATCATTGGAAAGCTACAAAATGAXXXXXXXXXXTGGGACACATATGTGTTCCAACCAAGAAGCAGAAAAAGATGATATGGGAGGCACACTACAACCATGTTGTAGGACACTTTGGGGTGGAGAAGACTGTTGT	CCAGCTATGACAAGGATTTGTATGCTATTGTGCAAGCCTGCAAACAATCGAAACACTACATTTTGGGGAAGAAGACTATCATTGGAAAGCTACAAAATGAXXXXXXXXXXTGGGACACATATGTGTTCCAACCAAGAAGCGGAAAAAGATGATATGGGAGGCACACTACAACCATGTTGTAGGACACTTTGGGGTGGAGAAGACTGTTGT
>Marker401060	CTTGACTTAAATTTTAAGTTATAGTATTATAACCATGTTCAACATCATATAAATTACAACCAGCTTTTTTTCGAGGGTTTTTATATCAAACCCACATAATXXXXXXXXXXCATTGTAATAATTTATATCTATCTAGTGCTAGTATATATGAATGCAACTATTAAATGTGAATTTAACACTAAAAATGTAAAGAGTCAGAGACTAGAGAGA	CTTGACTTAAATTTTAAGTTATAGTATTATAACCATGTTCAACATCATATAAATTACAACCAACTTTTTTTCGAGGGTTTTTATATCAAACCCACATAATXXXXXXXXXXCATTGTAATAATTTATATCTATCTAGTGCTAGTATATATGAATGCAACTATTAAATGTGAATTTAACACTAAAAATGTAAAGAGTCAGAGACTAGAGAGA
>Marker396484	TTATTTTCAGCAGTTGAAATAAAATTTCAGAATTTATTTGTAGTCTCCAATCTGCTGTTTCGCCATTCATATGTTCAGATTTGAATCTGTTTTGATCATGXXXXXXXXXXGTTGGAAACTACTTTTAGGTTAAGTGGCAGTGCAACCACTACTCTTCTCCTCCCGTTCAAAGTTTCTTGAATCCATTCTTCATTGCTTGCACTTGGCCTC	TTATTTTCAGCAGTTGAAATAAAATTTCAGAATTTATTTGTAGTCTCCAATCTGCTATTTCGCCATTCATATGTTCAGATTTGAATGTGTTTTGATCATGXXXXXXXXXXGTTGGAAACTACTTTTAGGTTAAGTGGCAGTGCAACCACTACTCTTCTCCTCCCGTTCAAAGTTTCTTGAATCCATTCTTCATTGCTTGCACTTGGCCTC
>Marker176495	TATAGAGGATGAGAAACATATTGTTCTTGCTCTCCTTGTGATGGATGACAAGAATTTTAACTTTCTTTCTTCTTTTGAGATACATTGGGAGGCAATGAAGXXXXXXXXXXCTCTTAGATGCTAAAGTGCCTTCCAAGTAGCATAGAAAATCTATCAAAATATGGAATAATATGAAACAAGAATTCAATTTCCTTGAGCCCCACGTGAAGA	TATAGAGGATGAGAAACATATTGTTCTTGCTCTCCTTGTGATGGATGACAAGAATTTTAACTTTCTTTCTTCTTTTGAGATACATTGGGAGGCAATGAAGXXXXXXXXXXCTTAGATGCTAAAGTGCCTTCCAAGTAGCATAGAAAATCTATCTTGAAATATGGAATAATATGAAACAAGAATTCAATTTCCTTGAGCCCCACGTGAAGA
>Marker417516	TTACTTGAGTTCATGAATGTGTCAAATTTCCCTTCAATGGGGTTCTTTGAAGTAACTTAGATAATACCTTACATTCATAGGGTATATCCATGGAAATGGGXXXXXXXXXXTATCACTTAAATATAACATAGTGTTAGGTGTGTTCTACCCCATTTGTTTTTTGCACTATGTATTTTTCAAAACTAGTTGGTGGAAGGATGCATAAGCACT	TTACTTGAGTTCATGAATGTGTCAAATTTCCCTTCAATGGGGTTCTTTGAAGTAACTTAGATAATACCTTACATTCATAGGGTATATCCATGGAAATGGGXXXXXXXXXXTATCACTTAAATATAACATAGTGTTAGGTGTGTTCTACCCCATTTATTTTTTGCACTATGTATTTTTCAAAACTAGTTGGTGGAAGGATGCATAAGCACT
>Marker540764	ACTTGCCATACCCAAAGCCTAAGGCAACAACTCCGTCTTGTTTCATGTTTGAAACAATGCATTTCTTCTCATTGAAATTCACTTGTATGTTAGGATTGTCXXXXXXXXXXCGATGGATTATGCACATGTTTAGTATTCATTTCCTTTTGATGCAATCTCTTAACTTATTTACTTGAATTACATTTTCAAAGTGCATATCTCATGAATTGT
>Marker404061	TCCTCTACCCTCTATAGTTACAGGCCTCTTCTCACCTGCAACAAATTTCTCAGAGCATCTACCTCTCTGCAGTTACAGAATCTCCTCTTTTGCAACAAATXXXXXXXXXXCTTGATGCAGTCGTGACCAGGGGACATTATCAGGCAACCCAATCACACAGCCAAATAACACAACAGGAACAGAGATTCATAAATCATCACACAAGTTGAA
>Marker299483	TCCTCTGCTTCATTCTCCCCATCGTTGTCCTTCCTATCACTCTGTTGCTCTAAATGCTCTGAAGCTATCTCCTTAGCAGAATAATACTCCAACTATTTCAXXXXXXXXXXCATCCCCTTAGTGGTTCCATTAGTCCTTAAGTAAATAGGACTATGAGTCTCCTCTCAGATATGTTGGGAACCATCACACTGATCCTCTGGAACTCTGAAA
>Marker396685	ACCTTTTATTACCACTTTGATTATTGCACCAAGTATATCAAATATCCTTATTGTATTTCCTTTCCTTTCCACAAGAGATCAAAGATACTTAACATTCTTTXXXXXXXXXXCAAGCCAATCTATTACAAGGGGAAAAACCCTAGCAAACAACTTTTTCAGACCATTCCTTACTAGAAAGCACAACAAATCTCCCTCTTTCCTTTGGATGGA
>Marker336026	ATGGTGTGAATGATCATGATTTTGTAATGTTTTTTGTCATTTATTTCAAGGATCTTTTCTTCCTTTATACTACTCCATTTTCTATGGGATATACAAAATAXXXXXXXXXXTAGGAAAGGGATCTAAAATATCACTATTAATCAACTTTAGGGGTTTTGTTTCTCTCCTAGCCTCTCCTTTATCATATTTCTCTTTAGGATACTTTCCTAA
>Marker291517	CACAAGCTTAGTTAATGCATCTACAACATTCATCAAAGTCTCTTCATTTTTCAACTTCACCCTATCATCATCGACCATATCTCTCACAAAATGATACCGAXXXXXXXXXXAAAGAGTAAAAACATAAGCACTGGTGGATCTTCTACTATCAACATCCCCTACCTAGTTTGAATCCATATAACCACAAATATTTAGGGAATGCATGTCTCT
>Marker97061	CCCACCCCCTGGGCCCCCCAAACCCTAGGGTTCTTACTACCAAGACCTCGACCCCCTAGTCTCATAAAAAGAAAACTGGTAAAGCCTCCACTGGCGCTAAXXXXXXXXXXTCTCTCCCTTGAGGAAAGTCACAAGGGTGACAATTGGGAGAAGGGTGAAAAGGATGTTATGAAGGGGAAGGATATATCCATTAAAGAGAAGGACAGTGGT
>Marker284681	ATCATCATCTTGTATACAACATGCAATAACTCTAATAAACCACTGTCATCATCCTGATGAGTAACAAACTCCTTCAAAGAACTGAGATCTCTTAAGACCAXXXXXXXXXXCCTAGAAAATGCATTCTACCAGAGTGAATGAATTGTTGCTAAGAGGGGACAATACACATGATTTAATTTTACGTCCATGAAGCCTTTTCATGCACTTAAT
>Marker448774	CTTTCCGCTTTTACATTTCAGCAGTGCATTCATACAACTGGATAGTTGTTCAAAACACTGTATGCTCTCACCTTACCCACATTGGGTTCTGGGTGATCGGXXXXXXXXXXAGAGATTCAATTCACAATGAAGGGAAAAAGGAGATAATACAGAAAAAAAGTGAGTATATTAATGTCCATAAATGACTAAATAATTGAATGAGATGCTAAA
>Marker250999	AGGATGATGGAAATCAAGGCAGAGATAATGATCCACCTCTGGAGCCAGAAAAGGTAGAAATCAATGTGCATGAGGAGACTAATAAGGAGATTTCTGATAAXXXXXXXXXXGAATAGATCAAAATGCATGATCTTCACATGAAGATCAGGTGCCACAAAAAAAACAAGATCAAGAAGTGCAGAATCCTCATGAGGATAAATTGCAAGAGGA
>Marker589240	TACCTGGTGACTGGCCTCGTTGTCAGCAGGTTTCACATAAATAAGTCTAAGTATAGGAATGACCAATATCATCATAAACCCTACAATCCATGAAATGAGAXXXXXXXXXXAGTTTGACAGTAGTTTGTTCAACTAACATCATAGACATGCTTATGCATATTAAGTTCACTGCAGTTCTGTAATCTGAATTGAAAGTTATTAGTGGTATTT
>Marker256938	ATAAAAGACATGATCAACACCACACCAAGCATAAGATTAAAGTGGCCGGCAAGGTTTGGTTGTATATGAGAAATTATAGAAGTTCTAAGAAGTATCACAAXXXXXXXXXXAGATGATGCAGTTCTCCAAAAGATGGAGAGGCAAACACATAGGGAGTTGCAAGAAACATATTGGTTGGTTTGAAAGGGCAACTTCCAACAAAGGAAAAAT
>Marker358390	AACATATATGATATGTAAGGGGGACATCACTATAATTGTATATAGGATTCCCATTTGAAACTCCAAGACTTGTGTTAGCACTACTACTGGGATGTGCAGTXXXXXXXXXXAAATTGTTGAAAACGAGCCAACTCAATGTCTAGTTTCCAAATTTGTGTTTCAAGGATATGAGCCATGAGGCTATATATGTCTATAGAGCCATGAGAATTT
>Marker355571	CCCAGAAGTATGATACACTAGATGAACAACTAAAAACTAGTGGCTAAACCCAACCTATTGACTTGGTTCCAAACATTGTCACTAAACCAAGAACAACTAGXXXXXXXXXXAGACACTATGTGGCTTCATGAGTGTTGTCATTGATGGCAATAAAGTTCATCCCACCCATCCACAGGACATGGTATGTCTTTACTGGAAGTCAGATTGAAG
>Marker198745	TCTTTGAAGATGAGATAGAAGTTTTCTCTAGCAAGGTGTCAAAGCCTCCAAGGAAAGGGGTATTGGGTGCAACACCTTTATCCCTAGCTATCTACTCAGGXXXXXXXXXXCCTTCCAAAATAGCAAAAACACCACAAAATCCAAAAATCCAAAAATCCAAAAATATTACTCTTAAAATTTTCCATTTGATGGCATTTTCCTTTTCCAAAA
>Marker496779	ACATTGGTGCAGGTCGTGGGCTTTCATGATCAGCAAATACTCTTCCATTGTCTCGTTTATTCAGCAGTTGGGGACGCCTAGGGTTTGTTATTGAGCTGCCXXXXXXXXXXCATTATCAAAACAAAGGCAAAAAATTTGTGTTTGGCTATATTCCACCTAGGTGGACCGTGGGATATTACACCTTTGTAGAATTACTATGATAGTAAATAG
>Marker515604	ATAGAAAGGTAATACATGATGGGAGAAAGAAAAACTATACTATAACATCAAATGGGAAGAAACATATTTTGATACCTTTGGAAAAAGAGCCTAAAAGTGAXXXXXXXXXXGGCAATGTCACCTAGATTGTATTGATTCCTTGGTTGGAATGTGGATTGCTTCTCAATAGTGAACAACCATAGTTGCCAAAGCTGCCATGATGATAGATGA
>Marker345828	TGATAATTACTATAATCACTTCCATTAACACTCCTTTCCTTAGTAGTATTCTTTACTACAAACTTCTCTCCTTATTTCTATAGTTTTTTTCCTTATGAACXXXXXXXXXXATACATTTGTATTGCAAGTATAAATATAAATATCACATATGCTTGGGTAGAACTTCTTCTTATATTGTATTCATTACATGCATTTCTCCAGTTCGTCAAG
>Marker175002	AAGACTGCTATCATATTTCATGATGAAGTGCCCTTGCTTTTAGTCATCCTTCACTTATCATGACCTAGATTCTTGAGCACATTATTCTATTTCAGAGAGGXXXXXXXXXXCATGTCGCCTGAGTTCTTTAGTAGTTTAGAGAGGACTTTCTAGGGGATTTGCCCCCGATACCCACTTGCTATAGGTTTGTGTGGGAGATGGTTAAATCTT
>Marker321327	TAAAATTTAGCAAAGGAAAGACATGGAACACAAAAAAAGGAGCAATAGAGGATACACTGAAAACAAGAAAAAAAATGATAAAGAGATTGAAAGGAAAAAGXXXXXXXXXXGCAATGAATTAGCAAGCATGCATGCCATTTTGTTTAGTTAGTCAACATAATTAGTTGCAAGCATTTTTTGCCATCTTCTCCACTCAATCAACATACAAGT
>Marker471333	CCCACCATTAATGGAAACTTTGCAACACTTACCCCTACTTTGCATCTAGTTCTAAACAAGTTATTTCTTTGTATTCATCCTTCTTCTTCATGATGCTTTAXXXXXXXXXXCCCTGCAATGTGTATCACTTTCTCCCTTGTCCTTGCAATAGATGTTACCCTCTTCTCAGTCTTTGTGGTAGGTATCATGACTCCTCCTTTCATTGTGGTA
>Marker446253	AGATTTGGGATACTATGGCTAAGATATTTTTGTATAGAAAAGTGTTATTTTCAGATATTAAGCTTTATTCAACAATATTGTAGGCAAAAGAAGATGGAAAXXXXXXXXXXAAACTATGAAGGAGGCTATGTGTATGAGTGATTTTGAGCCCTAGAGAGAAACTATGGATGAGGAGATGGTTGCATTGAGGAAAAATGCCACATGGGACTT
>Marker149969	TGAGTATTTTGGTCTGCATTCCTCCATTGTTGCATATTTTGTCCTGCAGTTCTGAGGCAATAAAGATACCTATTATGACTACCTAAATCCAGAGTTATAGXXXXXXXXXXGTTAGATCGATATGAGGTGAAGGTATATGATTGAAATCATCAATCTAAGTGGTTGTTTAATAGGTCTCGACCTATATGAAGTCTCTTGTATGTTTTCTTG
>Marker396204	AAATAATATTTATGTTGCATAATTCCAAGCCATGATAGGGTATATCACTTCACCATACCACATGGTTTCACTAAAAGAGACCTTCCATCACAAAACCTTGXXXXXXXXXXGCTATAGTAGAGACTCACTATCAAGTATTGAACCTTGATCTTCCTTATAACATCATCATAGGTTGCCCATGGATCCATACCATGCAGGTCATGCCTTCCA
>Marker228835	TAAATACTTACATCGACCATCCACTAAGAAAACATCACCATTGCTTCCTACACCCCCTCCACATCAAAAGCTTCAATGTTTATCATGGTGTGTGCAACTGXXXXXXXXXXACACTTGAGTCCCTCATTTCTATTGGGATAAGGTGCCATTAACCTTGTAAATCCCATTATTGTATTATTCCATTTATTATTTGTAATTACCCATAAGGGA
>Marker455027	ATTCCTTGATAAAGAACCACACTTGGGATTAAGTCCCCCTTCTGAAGGGGAGAAAACTTATTTGATGTAAGTGGACGTATCAAACTAAATTTGTAGTAGAXXXXXXXXXXTCTCTCCATTGGATTTAATCAAGTGGGAGAATGCTAGGATAGTGTGATATTTAATTGCAATCTTAATGTATAATGTTGTATCTCTAACATCCTAGCAATG
>Marker483906	TAAGGGACTATGGCCCAATTTGAAACTTCATCTTTTAATTCTTCATCCTTTAGCTCTTCTTTGACATTTTAGAAGAGGAAGCTGGCACAAAGTTGATCTTXXXXXXXXXXGAATTGATCTTCTTGTGGTTGATTTAGTTCAATATGTTGTGGCCAAAAGTAATCCAAGTTGAAGTTTCCTCAATTAGCTAAAGGAGTCCATCTACTATGA
>Marker669060	ATTCCATTATTTCCTAAGCAACATCTCTTTTATTTTCATATTTTTTGGGGCAATATATCATTGATGTTGGGGATATATAACTTGCTATGTGTGTTTTTTGXXXXXXXXXXAATCTAGTTAAGAATCACATTGTTGTTACTCTATAGTTTATTGGTTGTTTTCTATACTTTGTAATGTGTATTTTCATTTTCTTTGTGTGCAAGTGCTACA
>Marker335401	ATGTATCATTTATAGATGATTATTCTAGGAGGACATGGATGTATTTCCTTAGAACTAAATTTGAAGTATTCAATTGTTTAAAGGAGTTTAAATCCCTTGTXXXXXXXXXXGTCTCCTACATCAACTCTTGTTGAAAATACATTTATGGAGGTGTGGTTAGGAAAAAAAGCCCCCATTACAACATCTTCAAGTTTTCAGTTGTGAGGCATA
>Marker383150	TGGAAGCCCATGTAGTTAAGGGGTTATTATTTTTTTATTATTATTCTGGTTGACTTGGAATATTGGTTGTAATGGAATTCAAGGAGAAAGGTGGAGTATTXXXXXXXXXXGTTTTTGGTGGTCTTAGTTTTAGGAATCCACTTGTAATTGCCTCTCAACTCTTCTTTATAAATTGTATATATTGGATAGAGATTTCATGGTTATTTTACA
>Marker586664	TGAAGCTCAAATCAAGAAAATGGACAAAGAACTAGCTGATTTTCAAGAATTTGTGGGAAATGAATATCTAGCTCAAGAAATGACACCTCTTGTTGAAGGTXXXXXXXXXXTGATTACATATGAGGATGTTCAAAAGTATTCATTATGAATCTACAACCAAATATATGTGATAAGATATTGTTGATGAAGTATAGTTCTTTTCAACATCTA
>Marker456843	ATTGAAATGACAAACAATAATGCCTCATCCTTCTCATCCTTCCTAGATAGGATATCGTCCACTATATTCGCCTTTCCTTTCCTATAGATGATCTCAAAGTXXXXXXXXXXGCCATCCTTCTTGCATGAGAACTACTCCTATACCATTTCCTGAAGCATCACACTCCACAATAAAATCCTTGGTGAAGTTTGGACTAGCAAGAATTGGAGT
>Marker468224	TGTCTCCCATATCAAAAAAATATCCCCATCTCTAAGATCCATATGGGGACATCTCCAAACATTATGATACTTTAGATGAAGGTTCTTTGCATCTCTATATXXXXXXXXXXATCCCATACAGATAATAGTAAGAAAAAAAACAATAATAAAACTTAAGATACATGCATGCACTAAAGTTTAATCAATTGATTAAAAATATAGTCATCTTTG
>Marker588277	ACTTGTGTGCTTGCCTCACTTCTATTGATATCATTTTGAGATTAAGGGCACTCAAAGACCATATGACTTGCTAGTCCACATTAGAAACAAGTTCAACTAAXXXXXXXXXXCCTTGGATTTGAAATCTTAGTCCATTTAGGTATCTAGTAGTTGATTTCTCCTCTTCTCCCTACACATTTGTTCTAATTTGTAAGCATACAAATATTTAAG
>Marker442036	TCTTTCTTTCTTATCCAATTATCCTATTCTTTATAAGACATGCTTATGGGTTTAGTCAAAGAAGATACCTTAGCCCAGTGATCTCTTTCTACTAGAAGATXXXXXXXXXXACGACCCACACAACAAACTATTCTTTAATTCCAATCAATAGTAGTTGTAAAATTATGTAGCGTCATAAATTGTGCATGCTCACAATTTCACACTATGTTT

## Sheet: LG3
>Marker41937	TTCTTCAGCATAATTATTACTTTGACAGCATAACCTGCCAGCATAGACAGCAACCATCCACCCTTTGTCATCCCTTATAATCCCTCCACCACTAGCTTTGXXXXXXXXXXGTCTAGCAGTATCCCTAAAATTTTTAGGGGAAAACCCTGTTAGGGGAAAAACCATGGGGTGATTAACCCAAGATTGTATTCTCTATTAGAAGAATAAGAT
>Marker47136	AATAATTGAATGAAATGTGCCCTTTAGATTTAAAAAGCAACCAATCATGTGATGCCACATCAGCGCACCAACAAAGGAGGTCTTAATGCACACCTATTGGXXXXXXXXXXACTGGTTTGGCAGAGGCATTTGGCAGGTGTCTCGAGGTGAGCAACACACAGGGCCCAGGCCCCACATATATACAAGTTACAACAATCACGGGCCAGAACA
>Marker154411	AGTAACTTGTATAACTTTATAAAATGTTGCTTCCACTCATTATAAAGCAAGCCTTATTGCAAATTTCTCTCATCTCTCTTCTTTGCCAGCTTTACTAACAXXXXXXXXXXAAAATGGATAAGATGTGTTGGTGCCAAGATAAGCTCAAAGGCTACTTTTCCCTAATGAAGGCCTTCAAAGAGTGTGTGCATGTTGATGCCCGTCAACATC
>Marker217593	TTCATCATTAACATATTTATCATCAAGCGGCTAAGTATCATTTTTGGTAGGAGAAACAACCAGAGTAAGATGATGAAACTTGCCATTGTTTGACCAACCAXXXXXXXXXXAAGTGGTCAAGAAGCACCTATAGGTGAGCTACTTCAAGTGCAACTTTATTTGCTTGCACTTGTATTTGCACGAGAACATTGGAGCAAATCACAAATTTAC
>Marker222217	CTCTTATCACTCACAACTGCCCGTAAAATAGGATATCCCAGCTTCCTCCTCCCAAATTGCTCCCCCTGCTGCTGCTGCTGGGAGACAAACAAAACACTCTXXXXXXXXXXGGCCTCTGTGCATTTATCCTAATCTGCCTAAGCCTGTTGTCCAAGTTGGTAGCTATATAGTGCGGATATGCAGGGGTAGAAGCAGGAACTGAAAATGAAA
>Marker291301	ATAAATTTATCTAAATAATATGCTTATAGGTAGATATTTGCATAATGGTTATCATTATTTGTATGCATTTGCATGATCTTTTCAATTATGCATGCTATTTXXXXXXXXXXTGTTCCACATCTAGGTATGGTTGATTCTAACTTTGATGGAAAAAGGAATGAAAGCAACATGCACAACATGAATTGCAGTCCAAGGGATACAGTAAATTAA
>Marker221091	ATGATTGATGGTGGATCTTGTTGATGTGTGTTTTAGCACGCAGCAACGCAGGTGTGATTGTTGGTTTCACACCTCTCTTGAAAAGTATCTTACCCTAGGTXXXXXXXXXXATCCTAAGTGACTTTCACAATGCATAGATTTTACTTTCAGTAGACAAATGCTTTGAAACTGAACCAGTTTTTTGAGTTACCAAACTAAGATGGGTGTTAC
>Marker148495	AGCTTTGAAAGTAGTCTATGTTTTAGGCATGGTATCACCAAACTCTCTCATCTCAAATGTTGTAAGTTTTCCAAGAAAATGATCTTTTGAAACATCTTTCXXXXXXXXXXCTTCATATGAATCCTTCAACTTTTCCTAGATTTCATGAGTTGTTTCTAGATCCATGACTTTTACTAACTCAGTGTTAGACAATGCACTTAACAGAGCATC
>Marker133571	ATTAATAATGGTAGTTGTAATAGTAACTTTAATTACTTTATAAAATGTTGCTTTCACTCATTCCTAATTACTCTCTTCTCTCTTCTTTGTCAATTTTACTXXXXXXXXXXGGTGTCTATAGAGGTTGCAGATGGCTCTGAGGTGTTCCCAACACCTTAAGAGTCAAACACAGATGAAGTATAGATTCTTGAGAAACAAAGTAAAAAACAA
>Marker205520	TTAATATCGTTTGTTAGTATTGAATATTTAACAAAGTCAAGTGAATATGTTATAAACTCTAAAAAGAAATACAATTATTAAGTAGTATGTAATATATTTGXXXXXXXXXXAAGCAAGATCAAGAAACTATAGGACCAGATCGCACTATAAATGTCATTGCTTATGTCAAACATATCATCTGCAAGCTTGAAATAAAATATATTAATTATG
>Marker17853	ACCAGTTTATCTTTTATTTGATTTCATCAATATTATAATTGTTCTCATTAACATTTTCACATGATGCCTTATAATAAGACATCTTGGCCTTAAATCAGAAXXXXXXXXXXCAGCCATAACATATTTATGTGTTTCCTTATTAGTATGTGTCCTTAGCATTATTATTTACAAAACACACCATTTATCAGATTGATCATTAAGAAGAGAATG
>Marker149067	ACTTTTTCTAAGGGCTCTGGGATGAAATCTTCTACAGGATGCAACCTACTCCAATATTTTTGGCACAACAAACCTAGAGGTAAAAAGAGTGGCCATCCTTXXXXXXXXXXTGGAAGTGTTTTCCCTAATTTTTAGAATTTGTCACATTTTACATAAAAATTTGAAGCACTTAAAGATTTTATCTTAGAAGAAGTTTGTAATATGAAATGT
>Marker130881	ATTTTTTTGTCTTCTTGTTGTGGAAAGAATTCCTCCTATGATAGTAGATGCCAGAATAATTGCTTTTCTTTGGTCATCCTTCAGGTAACATAATTGGCCTXXXXXXXXXXATTGGTTATTCACCTGCATTGTGTTTGCTTGAAAAATTCCAAGAAATCCATTTTGTGTTTTCTCTGCAATCTTGCATTTTATGAGATGATCTAACTTGAG
>Marker201029	TTAATTCAGAGGGGAACTATTTTTGATAGTTCACCCATTTGTTTCTTAACTCATTTGTTCTTGAAAGAAAAATGGAATAGAGTCAGAATAAAACATTTTTXXXXXXXXXXCAGCAACACTAAGGCAGAGGAAGAATGAAGTGCAATAGATCAGTATATTGAGCTTATCCGGAACTGAACCTAAGCATATTGGATGCTTCTCATCAATTCA
>Marker122080	TTGATCTTCATTCCTCTATAAATGTGGAGCAATCTACTTCAACGATTTGCACTATTTCTCATGTTTTTGACAAAGAGATATGTTGACATCAATGACAACAXXXXXXXXXXCAACATCCCCCATCCAAATCCAAAATCATGCCTCATCCAAAACCCTAACTCCCAAATTTGCCACATTGTGGTAGCAACACTTTATCATAAGGGCTATGAT
>Marker164507	TCTTGTTTGCTGCGTGTGGTCTGGAAACTCATTTTGCCATTTCTCTTGGCTTTGTAGCACTTGCGTGAGCGCCTGGACCAAGATGGGTTTTTCATGAAATXXXXXXXXXXAATATAGAATAATCCGTTATATATTTCTCATAGATGACTAAAATGATCCACCTTGAGTTAAATAAAATGATCCATAGAAAAGTCTAAATAATAAAAACAA
>Marker41505	ATGTTAGACCTGCACTAATAATGAAGGAACAAGGTTATATTTCTAGTTACTAGAAAAAATGGTTTTTCTTTTGTTTTGAGTATTTAGCAATCTAGATATGXXXXXXXXXXAAATGGGAGAGGAAGGCTCACAATTACCATTGCCATTTTCTATAGTTCTTTTGTTTAGATTAATTGTATTATCTTTTGTCTATGTTAGGTTAAGCATTTA
>Marker303795	AGAAATCTCATAACCAATTCAATATTATGCACGTTGAATTAAGATTGCACGTCTAATACCACGAATGTAAACAACCGAAATGAAAATGGTTTACTATCTCXXXXXXXXXXCTAATTATTTATCATAGTTCAAATTCACTGAAATTAGAAGTAGTCACTGCTGTAAGAACAACCTATAGAAATACCTCCTGCAGTAGCAACACGAAATCAT
>Marker112189	GTCCTTTGAGAACACTTTAGGCATCCAGAACTAACTGTATTACTTCTATCATTTGACAACTGACCTTGTGGACCATTAGAACACATGATATTACAAGATAXXXXXXXXXXCTTTATCTACGGAGGAATGCAGATCAACACATTGTGACTCTGCCTTAGACTATACATTGTAAATACCTTAATCAAATTTCTGTAACTTCTCTCTAAGTGT
>Marker396563	TCACTAAGTGGGTCAAAGCCATTCCACTCACTTTTACCACAGGAATCCAAATTGCTAAATTTTCTTTCCATTACATAATATGCCATTATGGCATTCCCCAXXXXXXXXXXACACCATACTCATTAGTATTCAGTTCCAAAGCCATTTTGCCTATTGAGGTTGAGCTCCCATCACTTAGGATTTCATTGTAGAATATAATCATTGAAGAAG
>Marker416660	AATACTTTCCAAGAGCCATGGTTTCATGTTTTCCATCTAATTCAGGGGCAATAGAGCCTAAGGAGAAACGTAAGGTGACTAGTGATGCTCCAAACTTAGTXXXXXXXXXXTTTGGTCACTACTAGATGTAGGTTACGTAGGTCTCTATCATTGCTCAAGTTTTCACAATCATCAAATATGTGGATGCTAATGCACCTAGCCTTGGAGAGG
>Marker201807	AAGATGGGTGATCTCCTGGGAAGTCCCAATGCTTCACCCCTGTATGCATCACCTAGATGCAATGAGTGCTAAGTGGACCATTCATTAACATGAGAGATGGXXXXXXXXXXATACATGAAGCATAAGTGATACACAAAGTATACACGTAAGACACAAAGCATGAAGCATACGAAGTATACACATAAATACGTGTGAGGCATGAAGCATATA
>Marker318135	CCTTCCAACAATAGTTGTGCCAACTTTACAAGCCATCTTTGGGCCCACCATATCCTATAGTCATAGGTCACACTTGTATCCTACACATCTACCCCAGTATXXXXXXXXXXACTAGCCTCAGCATTGTAATATGCTCCCATGTCCACACCTATAGATGTGTCACATGTGCCAAGATCCATCCATCTCTATACACAATCAAATATAGATCCC
>Marker130609	ATCAACATACCATCAATGTATCAAGTTCCCTCACAATGACCAAGAAATTACTATTCAAGGCCATCCTAATCCATTCCAATATTCCAATTCCATCCAATCCXXXXXXXXXXCATATCATTGTCTCCATCCCTCATCTTAGTTATTGCATTGTAGTTGCATTACACAATCCTCCTCATAGCCATTATAGCTTTGTCATCTCAAAAGCAAGGA
>Marker118998	CATTCTAACCAAAAACTGAAGGACACGCTATCAACAAAATTGGGTCTGAAGAGGCACCCACAGGAAATCAGCTATAGACAAAAAAAACAGGACTAGATATXXXXXXXXXXCATTCTCAGGAGGATCTGTGCTAGAAGAGCCAACGCCAGGCATAACAGGAAGATTCCTCAGCTGACCCTTTTACTCAAGCACATCTTTATATAGAAGCAT
>Marker106625	TTCATATAGTTTGTATTAGCTATATAGGGGTTTTGTGACAGGTAGTTGTTCTTGATTCAGTGATAGTTTTAGGATCAAGATAACAAGTTGGGTTTGGTTTXXXXXXXXXXGGTGGGGACTATGCTATCAAAGAACATGAATAAATTTGCTACTTTCTATTATTGGTGAATCAAAGACCACATTTCAAGGTGCAACAACTAGTGAAATAAA
>Marker177917	ATGACAATAATTTAATGTTTCTAGTGTTGCTTTTAAACCTCCTATGGTTGTTACCTATGCCTCATGGTATAACAACCTCTACAATGTTAATTATGATATTXXXXXXXXXXTCACATGCTTGTTACATCAATGTCAAGGGCTCAGAATTTCATCACCTAGGAAAGCATGTTACCAAGATTTGATGGATTGCCCATTAGGCAATCAAATCTT
>Marker142522	CATCTCATCTTTTTTTATTTCTTTCCCCTTAGGCATAGGGATCTCCTCTTCTTGATATTCTTCCTTAACAAATATTTCCACAACCTCTTTATTCTTCTTCXXXXXXXXXXTATGTTGAACAATTCAATGTAGAATGCTGACAGTCTATAGTATCTTCTTCTCCTTACCTCATTCTCATTAGGACAATTGGCTCAAAAGACTTCCAAATGT
>Marker377575	TTTCTTTTTTATTTTCTCTGATAGATGTCACCCTTGTAGCTTTAAGTTTAGATTTATCTCTACCCAAAAGTGTGGACATCAACAATCTTCTCTTTTTCACXXXXXXXXXXAAAGACAAGGGACTAAGCACCACTAAAAGTTTCCACTATCCCGTTGGAATTCCTTTCTACTGAGGAGGAATGGGGAAGGTCTCCTTGCAAGGTTTAATTA
>Marker47337	AATAGTAAGGATTGATTCATCACCACTTATGTGGGTGGAATACAATCCAACACTAAGCATCCATAAACATAGATACAACTATACATATTTTGAACAAAACXXXXXXXXXXAGAATACTTCAAATCAGTCTAGCCCCAATGGTGGTATAGCACCACCCAACCATATGGAACCCTCAAGCCCACCCCACTATCTTAGGAGTTAGTCAAATTG
>Marker143841	ATCTTTATCATATGCCATCTCTACTAGATTAAAGTCTCCGCACAAAACCCAAGTGGTAGTAGGCATTAAATCAACATCTAGTTCTATCTCCGGGAAGATCXXXXXXXXXXATTAAACAATATTTTAACTCTCTTACAGTGCACGCTCTACTTCTGCATGTGTTTCTAGGGTTTTGTTTAGATTTGGTTGTTTTGACACATGGGGATGGAG
>Marker311336	TCTATGTGGATCTCCATGTTTGCACCTGTATCATCATCACCAATGTGCACATCCTCCATGGTCTTGTCCTTTTCTTATTCTTCTTCATCATATGACAAATXXXXXXXXXXTCTTGCTTCCTGAGCTTTCTTAGTCTTGAAATTTACAATTGTGGGGATGGGGACATTATGTTGGCACTATGTTTGTATTGTCTTCACATTCTTCCTCTTT
>Marker61740	CAATAATTTGGTATTTTACTCTTGTCTGCAAGAGATTTTTCTGTTATTTGTTAATTTATTGTCGTATTTGCATAATCAGGGTTTTGATGGTCAATTGGGCXXXXXXXXXXAGATGGAAAATGATAGGTTGGATGAGACAATGTGCCCCCAAGTTTAAGTGACATAGAAGATAAACCTACACATGACCCCTGTTTGCCAGGTTTTCATCAT
>Marker130193	AAATTTTGGTCAGATTCAAGCAGATATTGTTGCAGGATGAAAAGCTCCATGTTTTTAGCTTTGGAGTAGATTTCTAAGGTTGTATATGTGCTGCAAATGAXXXXXXXXXXTGAGGGTTGAGCGCACCAACACATAGTCCACCTCACTCTCCTTCATCAGATGTGCGGTGGTGCACTAAGGCCTTTTAGTGGCCAATCTTGGCAAAATAAA
>Marker213458	GATTATAAACAACCCACACTGTTGCTCTACCCTCTTCACTACCCAACCACCTCATCCTGTCTTCATTCCTAGAAATAGGTTCCCTGATCAACTTAACTAAXXXXXXXXXXTTTCTTAGAAGATTGTTGCATATTTTAAGGAAATTTTAAATGCTGGAACCCTCAAGAAGAATGACATTTTTGTTGAAGAGATAATCCACATCATTCTATA
>Marker102186	AACACATTTGATGGAGGGATTCAATTTCTTTCATATGCATATGTGTTGGTTATCATAGGCACATTTGGTTTCGGTGCACTAAAATGAACATAACTTGCTGXXXXXXXXXXGGGGATCAAAAACATGTTAACTTGTCTTTCTTTTGTCAGCCTTAGAGTGGGCCTGCTCTTGAGCCAAATCCACAAGGAGAACTCATTTGCGACCCCAAGT
>Marker46344	CTTAAAATGGGTGCCTCCCTTATTAAGCATGGTTTGTTTTGGAGTTGTAATAGTGGCTTAGATGCCCTATTCTGGATTGATTCTTGGGATGGTTGTCCACXXXXXXXXXXTATTATGTTGCTTCAGGATATCAGGAGTTGGATGGTTAGCAATTTGGGGAGTCATACTTTCCTTGGTGGAAATTTGTGTGGAATAAGTTTGCCTGGCCTA
>Marker117336	TAGAGATCTGATTAAGATTTCAAACTTGCATATTGCTAAATTCTAAGGTTTATATTTCATGTTTTCAAGTTGTATTATTATTGGTTATGATTTGAAATTTXXXXXXXXXXAGGTGGCATTCATGCCTTAGATTTCACCTAAGTTGAGAAGTGTATCAAAACACCTATCATCATATTGGTTGTAGAGGGAGGGCCTTTAAGGAGAATTCTT
>Marker146785	ATATTGTTGGCTGAAAGTGTGACACAGGTTTGTGCTTTTACCCTACCGCATTTAGAGAAAAGTTGCAGAAGTTTGATTAAGGCCTTCACAGTGTATATCCXXXXXXXXXXAGATGTGTAATGCATGCTTTCTCATAGTATTAGGTGTTCTTATGGTCCGCAAGGTTAGATTTCAAGTAACAGAAGTAACACAGACAGTTCCAGATGCAGA
>Marker409450	CTTCTTGTTGTTATCCTTCTTAGTTGTGTTTGAGCTAACTAAACAGGAACTTTAAAGATTTGATGTTACACAGACAAACTAAGATGACAGAAACTGGTATXXXXXXXXXXACAAGGAAGTGACGACATGGACACAATCCGTGTTTGTCATTTCCTTAATTTAACCAACCAGAGCAACAAATAGAGGAGGATGAGATAAGAAAACTGAAGC
>Marker288895	TGGTTTTCCTGTTATAAACTATTGTAGGCAGTGAGCCTCTTGTGAGTAGTGTGCTCAGGTAATGAGCCCTAATTGGCATGTGCCATTTTGTTCCTTCTATXXXXXXXXXXCTCTATCAAAGACCAATTTGAAAAAGGAGCTCAACATCCTCAGCTTATGTGTGTTAGAGTTAGTTAATGTGTTTTCTGTGTATGAGTGTTTTAGTATTTA
>Marker184590	TAAATAGCCAAAAGCTTTGTCATGTTCATTAAGCCATACCCTCTTTTACCTAGCATATCCTAGTTTAGGATCAGTTTCTACTATATGCTTAGTATGACCTXXXXXXXXXXAATTGGTTGTGACCTTAGTGTATTACATAAGTTAAATTAGGCCTAGTGTTGAAAGTATAATTTTGTGACAAAATAAGATAATCAAACTACACCAATTAAA
>Marker115306	TTTGAGCCTCTTGTGCCCATACAAAACAATTTGGCTCAGGATAACGATTGGTGTAATCTATGTAATCAGCCACACGATCAGAATTTGTGCCAAAGTGGACXXXXXXXXXXCATCATCTTCTCATATGTCCCAAACGGCTGCAAGTGGAGAATGAGTGGCAGCGAGTATTCCATCAAAATAGGTAGACTGTCCTATTGGATAGATAAATTT
>Marker39955	AGACTATGACAAGGCATTAGGCCTTGATCACCATCACCTTAAATGTTTGTTTGGAAAAGACCATGCTTTCCATTTTCTTGGAGAATATAAATTAACTTGCXXXXXXXXXXATGATAGAAGTGAAGGCAAAACTTGGTTATCTTAGATAGGATTTAGAGGCTAAAATCATTTCTTCTGCATCATCATCTCTAAAGATATTGCAACAGTTAC
>Marker130947	ATACCTAGGGACAAGTTGCAGAAGCTTGGCTAAGGCTTTCACATTGTATATCCTAAGTCAAAATTACAATATTTTGTTCTACATTCCTCCACAGTGTGATXXXXXXXXXXCTATATTAGGTGTTCTTATGGTCCACAAGGTCAACTTTCAAATGACAGAAGTAATACAGATAGTTCTAGATGTAGAAGTGTTCTATAGAACACATGTTTG
>Marker509428	CTCCTCATCTTGCCTCTCAAAATCAACAATCTCATCTTCTGTAAACATGAGGTCCTCATCTTGGGTAGTCCAATTGCTATATGGATCAATGTCATCCAAGXXXXXXXXXXAGTTGCAAAGAAGACATTCACAAGTTTGTAAGTAAGCAATAAATGCACACATCAAAGATTTGAAGTGAAATGAAGTGAAGACTAAGATTTTGTGTTACTT
>Marker203871	ACTTTTGGGTGGCTTTTTGGCTCATGTTTTTGTAATTACCATTGACGATTTTGTTGAACACACAGAATACTGAGAGGGGAGGTGAATCAATATTCTCTTAXXXXXXXXXXAACTTGTTTCCCAATGACTCATTGTCCTGAAAGAAAGAGATAGAAGAGGTGGCTCACTACTAGAGTTGAACTGTTATAATTGTATCTAATATATGCAAGG
>Marker121843	CATTTGTGAAATCACTACCAATTGTCCTAACATAGCAATAGGTAATCTTTGACTGACAAGATGAACATTGAAAACAATCTAAGATTTAAGAGCCTCCTGAXXXXXXXXXXTTTTGCTTAATCAGGTCAACTATTTCCTTATTGTTACTAGATGATTTCTTCAACTTACTTCTACAATACTGTGCCTTATGTCCTAACTTATGACATCTAT
>Marker345247	TCCATTGTCAATAATAACTTTACAACACTTATCTCTAGCTTTGCATCTAGTTCTAAACAAGTTCTTTCTTTGCACTGGTCCTTTTTCCTCAAGGCACTTCXXXXXXXXXXCTTTGTGGTATACATCACCTTCTCCTTTGTCTTTGTAGTGGTAGCTGCTATTTTCTTGGCTTTTGCGGTAAGTGTCATGGCTTCTCTCTCCATTATTGTA
>Marker110632	GCAGATTCAAGTATATCATGTTTTGATCATTCTAATATTGCTCACTCTTCTCATTATGAGGATTCTCACTTGGTTAATTCTAGTATGTAGGTTAAGAATGXXXXXXXXXXGCTTTCTTGGGAGGTTGCTTTGGAAGGTAAGGCTAATCATAAGTATGTTTCTCTTGCATTTGAGCATGAAAGTGTGTCAAATGATGATGCTATTGATTCA
>Marker94355	ACTGATGTGGGTAAAGTTTTGAGCATACATGGATTTGTAGATTTAGATTGGGTTGGAGATCTAGAAAACTAGAGGTCAACAAATAGTTATGCTTTTATTCXXXXXXXXXXTTAGTATCATTTTGTGAGGGAGATGGTTGAGAACAAAAAATTCCAAATGGAGTAGATTGGCTCTCGGGTAAATACTACTAACTCTTTGACAAAACTTGTA
>Marker354402	CATATTTCTGATTTCTTCTATCTAATTTACCAATTCTATCACCAGAATCATCTAAAGAAGATGGATATTGCTCTACATATGCATCATTCCCAATTGAAGGXXXXXXXXXXGACAACAACCAATAATATAATCAATTCCCTAGTAGCGGTGCCAGTTTTGTTGGTGCACAAAGTAGATGTTCCCCAAATCCCTAAAGCTGACCAATTCTTG
>Marker73209	TCATTTTTGGAGGAATCTTTAATCATAGCACAACAAGACTTAGGCCCTTGACAATAGAGGGTCTCCTCTTCTACACTTTTAGCTTTGTTAAGCCTAATCCXXXXXXXXXXATAAGTTTGATTAGCTAGATGCTTGGTCATAGATTATCCAAACAAATAACAAATCTTCCATCCTAACATAATAGGCATATATCCAAACAGGATAGGCAAA
>Marker232690	ATGTTTTCCTTAGTTTTAGAGGACCGGATGTCCGAAAGTCTCTTGTAGATCATCTCTTCCAAGCTCTCACTGCAGCTGGAATTCATGTTTTTCTAGACACXXXXXXXXXXTACAGTAAAGGTAGATTTGAGACACGCATAATTGACGAATGGAAGGATGCTCTTCATTACATCTCCTCCTTATCTGGATGGTCTCTTCACATGACCGCAG
>Marker202855	AAGGAATTGATCTCTCAAGTCTTGATCCCCATCATGCGGTGGGTTTGCAAATTTTTCTTAACCATCATACTTAAAAGGTAATGAGTATTTGGCAATCCCCXXXXXXXXXXCTGATCCTCATGGTATCAAGTATTCTTGAGGTATTCTTGAGTCCCAATCTTCGTTATATTACAAGCTCCTAGACTTTTCCCTACCATTACACCCAAAAAG
>Marker280926	AATTGCCAACGCTAGGATATTCCCAGATCGGGTCTGAATAGAGCATGTTTAGAACCCGTGACCACCATTTGTAGCGCTAGAAGATATAAACTGAAATCGTXXXXXXXXXXTATCATCCAAAGGTCAAAGGCCACTATATCGTGACTTTGTCCGGATAATCTTGTGAGCTATGTAACTCGGCAAGAAATTTGGCAAATCATATCTAAATTT
>Marker125306	CTTTATTCTTTTAACATAGAATACAATCTTGGGTTAGTCACGCTGTGGTTTTTTCCCTTAATAGGGTTTCCACGTAAAAATCCTTGTGTCATGTGTTAATXXXXXXXXXXTCACTTTCTGCTTTAACAATTCAAAAATCTTATTTTCTCCTAATGTCCACTTGAAATCCTTTCTATCACCTCTCATTATCTCTGTCATAGGTGTGCATAC
>Marker433063	GCACTTCTGGGCTAAAATCATATTTATATAGATGTTTTGGTGTCTTAGCCACTACTTTGGATTCACTAGCCGGATCTCTCTATCCTTGAAAAATCACCTTXXXXXXXXXXCATCACTATGTTCCTCAATATGGGATGGTCTTCTCTGCTATTGATTCTAGCTCTAAATGCCTCAATGTCTGTGTTACCAGAATGGGTGTCTTTGCAAAGC
>Marker175937	ATTATCCTGAGGGATGGGAAGAGGGATAAATAAGGCCTCTCTTCCCCCAAGCCCAATCTGGAGACTCACAATAAAATAGAGTTATTGGAATTGCCAGACAXXXXXXXXXXGGGGGCTAGGGGTTCCTACTTATAGCAAGATAACAGATGCTCCACCCTTCAACGGTCCTAACAGCCAGCACCCTGATCAACCCAGCCTCGCCATCAATGT
>Marker222650	TCAAATTGCTCCTATTTGGAAAAATTGTTCTTCTTGACAAATGGGACAAAATACAATTGATATGGATTATATTGTTATAGAATAGCACCATAGAAAATGTXXXXXXXXXXAATTACACTGAAATGAAAAGGAGATTATTGATCAATTTTAATTTGATAAGGGTGTTGTAGTGGATGGTTTCTTACATGAATCACTGAAAACTCTATAAAG
>Marker79487	GGGATCCTGTGGTGGTCTCTCTCCCATTATGTTTTCTTCTGATTCTGAATGAAATTGAATCCTTCTCCTTCTGCATGTGATGAACTCAGTGTCTTCTAGAXXXXXXXXXXGCATTAGAAACTAATACATTCATCCGCTAAGAGCAGGCATCTTCTTATCAGTAGGCATCCACTTATGTAGTGGGGGTTCTCCACTTATTTAGTGGGTGAA
>Marker130980	TTGTTGGCAAATCTCATAGGACATCTTAGGTCTATACTCTTCGTGAAGGGTAGGGCCATTTCCAGGAAGGAAGGTGTGCGGGAGACCGTCGGTCTGTGGTXXXXXXXXXXGAAAAATTTTATCACCTTTTACCTCTTCGAATTTACTTCATGTAATTACTTGAATTTAGAGTTATTGAAAACTATGGATATTACAGTTTGGTTGACGAAA
>Marker175886	TATAAAGTGAACATCAAAGAACATGTTAAACTATGCTAACCTATCCCATTCAAAATTAAATGCAACTGCCAATTAGAACAAATAGGAATGCATATACAAAXXXXXXXXXXAGTGGCATGATTTGATTGGTGCACAAGGAGGGGTTCAAGATTCAAGGGAGATAAATGGTGGAGGATCTCCTTGGAAGAAGTGGATGGTGAGGATCAAAAG
>Marker74935	GAGACTTCAGCAGTAGCTCTTCTCCTACTAGGAGGTGTATGAGTAGTTCTAAGGGATTTGGAAGAAGCAGTAGTAGGTGTAGACCTACTTGTCCTTCTAGXXXXXXXXXXACACTCTATAAGCAAAATATTCATCCCGATGAGAAATACCCCGAAACCCATATCAAATGGGAACTATGGGCCCATTTAATGCTTAAGTCTAGACTAAAAA
>Marker435722	TTAGTGTTACAGATATGTGAATTGATTGGACAGACAATTTCTTGATACTGCAATCACCATATGCCTGTTGAATTGAACATCAATGTAGGATATGCCGTTAXXXXXXXXXXTGCCATTGTATCAATTGAACAAGAGGAGGTTATTGCTACACAGATATTGGATTTGAAGAGTAATATTGTAGGAGCAAAGAGTGTTAGAATGATAAATCCT
>Marker182179	CAGCTTTCAATGGTTATTGTTATTCATGTAATAAATTCGGTCATAAGGCTACTCAATGTAGGAGTAGAATGGATCAAAATGTCCCATCCTTCTCCGGTCAXXXXXXXXXXGATAAGATAGTTAGATCTTTCAGTGACTACTGTTATACAATATACATGCAAGAAACTTGGACATAAAGCTAACCAATGCAGATCCAAAATGAATGAAAGA
>Marker111535	AATGCTATATAAAATTGTTATCAATTTGTATCAATTTTATATATCAAGTTTATGTCAATTTTGTATAAAATTTATATCAATTGTGGAAAGGTAAAAGATAXXXXXXXXXXAATAACTGAATTTGACTGCAATGCACAATTAAATAACATATTCTTATTCATTACATGACATCAAATAATCTACATGATCAAATACATATTCTTACATATA
>Marker52898	GAAATAATTTTTGGAAAGTTTTGTTATTGTTTAATTGGATGATATTTTGATTTTCAGTAAGACTTGGGATGAGCATCTGATGCATATTAGAAGAGTTCTAXXXXXXXXXXCCCAATTATCTACAAGCCTAATCAAGGGCTCCCATGGAATATGTCACAAGATACCTTATCTCCTCAAGACAGATAATGAGAGAGTCCTTTGACATCTTGT
>Marker100399	CTCTTGAGAGAGATGATGTAAATTCTGTATATAAAAAAATTTGGATTTGCAAATGGAAATGATTAAACAATGAAATACATAACCTAAACCCAAATCATTCXXXXXXXXXXCAAATGGATGGTTAAGATCAAAAGGCTAAATACTTGATGTGGATGGCTAGGATTGATTAGTTATTCCCACTCTTCAAGGGAGTTGTAGTCATGTAACAAG
>Marker147653	CAATTTTATAGAGGATCATTGTGAAGAACTTCCCTCTTCCCCTCCTAAGTATCCTCCTCTTAATTCTACTCCAACACCTTCTCGTCCAATAGATTTTCAAXXXXXXXXXXAGTAACTTCTCAGGAGTAGATACCTACTAATAATACACGTCAATAGTTCAGTAAAATCATTTAGCATAAAAAGAGGGTTATCCAATCACCAATAAATTAT
>Marker149004	TAAAAGGTTGAAAAAGGCAAGGAAAAGAAAGTTCAAACTAAAAAATAAGTTGCTCCAGAAGAAGAAACTCAAACTGAGGCTCCGATAAGAATTCCTAAAAXXXXXXXXXXCCTGCAAACAAGAATGTGATTGGAACAAAGTGGGTTTTCTAGAACAAACTGAATGAACTTGGAGAAGTTGTGAGAAACAAGGAAAGACTTGTATGTAAAG
>Marker90960	CACTTTTCTTGCATATTGGGGCCAAATTAGTGACCCAAGTGGAATGCCTAACTGAAAAAATGATCCTTGTAGAAAACAACTTCTTAACCTCTTCAAATATXXXXXXXXXXGCTCATATTCACCTCCATCTATTTTAGGCAGGTCTTTTTGTTTGATCATACTATTCAAATCAAATGCTCTCTCTAACTCAATCATTCCTTTCAGAATTTT
>Marker499809	TAAATGTAATACTAAAAGTAAATAAGTAGGAAAAGATATCCAAAATGATACTATAAAGGATGCAGTATGTCACTAAGTGATGGAATGGATCACCCATCTTXXXXXXXXXXGGTGAAAAAGGCTTTAGTAGGGTCATTTTTGTAAAATAACACCCAAGAAAAAGGCATATGATAGAATAGAGGGTAAAACTAGGATTCCAATGCAATGAAG
>Marker74491	TATGGATACTACACATGTCTCTAAGGAGGCATTTTGGTTATGGAGATTGTGTGTAGGTATTGGTTTTAATTGTAAGATCATTTAGATTAGCTATGATAGCXXXXXXXXXXTATGGGTGTATTTACAATGTATGATGTCAAGTGGGAGAATGTCGGAATTAAGGTGTCATCAACCTTGTAAATTTCATGTTTATTTATTCCTATTATTGTT
>Marker224010	CCTATTAGTAAAGTATATAACTATAACACATGGTGAATACTGCATACCCTACACTTTTCTCATTTATTGGGTTTAGATTTCCCTTTGAACAATAACTAGCXXXXXXXXXXTTGCAACTTGACTATGAAATACATTATATTCTAAAGTGTTGTATACAAGGACAAACCTTAAAATTCATTATGATAATATAGAAAACATTGGGAGACTTCT
>Marker270107	AAGAACTAATGGAACAGCTTAAGGAAATGGAAATGAGACCTATTGCATCTGATCATAGGCTCTAGAAACACGTAGCAAAGGTTGAAGATATAGTAAAGAGXXXXXXXXXXCTTTGATCAAACTGTATAATCCATCTACCATATTTTGGTTGAACTTTCTAGATATAAACTTGTTTGAAAACCAATTTACTCAAATATGGCAATTTACAAG
>Marker255646	GCACATCCTTGCACTTGTTCTTATCTGCCTTGAATGCTTCCTTCAGTCTGCAACATTTTTCAGTATCACCACCTACTCCCCCTAAGAGGTAGACTCCATCXXXXXXXXXXTGGGTTCTTTGAAATGTTGATGGCACTAGTATTATCACATAAGATAGGAATTGGATCCTCATACTCAACATGGATGTCCTTCAAAGTTTGTCTCATCCAT
>Marker306327	ACCATCTGGGGTTATACAAATAAGCATGAATGCATCACAAAGATTGATTTACAATGTAAATAGTTGCAAAAATATGATTTTATAATCTGATGCAGAACTGXXXXXXXXXXAAGAAGCTGAAACCAACCAATTATTCACTGTAACCGTTGGAAAATCACTGAATTCTCAGAGCTGAAAGATACTAACATTTGGAACCCTAGACTCCAAAAT
>Marker170063	AGAGTTTACTCTTATATAGAGTCCAAGCTTGGCTTTAACTCCTTTAATTGGGCTTGATACAAGGCTACCTTCTCCAATACTATTTCATGGCCACTATGTTXXXXXXXXXXATGGCTTGTTTGAGTAAGATTAGTTGTGGTCGTCGACAAGACTAGGGGTCATCTATGTTTGAATTCAAATATTTTTTTTGAAGTTGGAAGCCAGCAACAT
>Marker436001	ACTATTACAAGACTTACAGTATTCAACCAAGACAAAATAAGGCTTATAGCATACATCTAGGTCAATATAAAGAGGGTGCAACAAGTAAAAACACCAGAATXXXXXXXXXXATCACACCCTTGACACAATTTTCAAAACTTTATGAATTGGTTATCATAGTTACCAAGAGGATAATAGGTTTCTAAGGCGTTAACAAAACTAGAGCAAGCT
>Marker404489	GTGATACCATTGAAAGATATACCTTCCAATTCATAGGGCATTCTAGTGAATCAGCCTTTGGGTGGTTCTTCTCCACCTATGTATCACCAACATAGAACTAXXXXXXXXXXTTCTCCCCATTTCTACACACATCTCAAGAGCCATATTCTAATTTAATTACTAAACCTCCAAATCCTTCTAGTTTAGTCATTAAAGGGGTATTAGAATATT
>Marker242301	AAAGACTACTAACCAACTATTAATACAATTGGTAGATAGTGTGACACCTAACTAATATGGAGTGGGCGTAGCTTGCAATCAACCATGTCAAATCCCCTTAXXXXXXXXXXTACCAAGTTGATGATGAAGCCTACAAACAATTGAAGAAACCTACACAAAACTCAGAGGCTACTCCATATAGATCTCCTCATGAAGATCACCATGAAAAAA
>Marker88027	AAGGTAGAGGTAGTTGTCTTTTCTTATGGTTGAGACACCATGAACATCCTAGGTAACATTCCTATTGCATTAGTTGATTCGTTGTCAATGGAATGCATATXXXXXXXXXXCATGAGAACTTCTAGAGGGAATTGGAGAGGTTTGTCTTGCTCTATCCATTCCATGATCTTAATTGTTTTCTCCTTGGGAACAATTTCCTTTAGTTTTGAT
>Marker27428	GCTGGGTCATAATGTCATTTGGCCTGAAGAATGCAGGAGCTACATATTAAACAGCTATGACTATCATCTTCCATGACCTCTTCCACCACATAATGGAAGAXXXXXXXXXXCAGCTAGCTGATAAATGCCAACCATTCCAGCACCTACTCAGAAAAGTTATAGCTTTTGTCTGGAACACTCAGTGTCAGGATGCCTTTGATCAACTAAAAG
>Marker302314	TGACTTATATGCAAAGAGTTGATAAAATTTTGAAATACAATTGGCTGGAAAGGGAAGAATATAATGTATGGGTGCAGAAGTATATGATGGAATTACCACCXXXXXXXXXXTTATGAGCAGACTGTCTATGTTCTCTTGGATCCAAATATGTGATTTCAAAGGCAAGAGAATAGAGGAACTTTTCCTAGGCTTGGGTGGCTCCAAAAATTA
>Marker255565	TGATTTGGGGTTATCGTTTTAGGTTTACTCCCACTTGTCAATTTCTTTGTTTTCTTTCTTTTAATTGCTTTATTTATGTTTCATTCAATCAAGGGCCCTTXXXXXXXXXXTACGTGCAAGAACACCTTGACTAAGAAGAAATAAAAGAAAGTGTAATACCATATAAGTAGTTGATTACATTAGTGCGTAAAAAGTATAGATCATAACATT
>Marker157109	TATGTTTCAGGTTTTTCTAAGGTGATAACAATTGATAACACTTTGGCCAAGATTCAAGACATCTCTTGACTAATGAAGGACAATCTAAAACTGGAGCAAAXXXXXXXXXXATAGAGCTACCTGCATTGGATGAGGAGGGATCCATATTTTTAGAACTTGAGTTTATTTTGGACAAACACATCAAGCACCTTCATAATCATTCTATTGAGG
>Marker160301	AGCGCCTTAACGCACCCTCTCATATTGGGTGAGTGGCGTAGAATAGATTAACGTTCAAGCTCATGGAGGACTCTCCCGAGGTAAACCATGGAACCTCTATXXXXXXXXXXTTCCTAGAAGGGGGCATTACAAATGGTATCAGAGCTCTCGTCCTGCCATCTTGTGAAGCAATTTTATGCAAGCGTATACGAGGACTCACAACAACTTAGA
>Marker47952	TGAATACCAATCATTAATGACATAGATTGAAGTTATCATAACAGTCATGAAAGGATGAGCCATGATGGATAGTCAAATCTCAAGTGCATGGAGTAGTCAAXXXXXXXXXXTAGCCTATCACAAGATAATAGGTGTGAGGTCTCATAACAGGAATGACAAGAAACAGTCAATGGTTTCCAAAGGGTGATTAAATCTCAAGCAAGGGCAGCG
>Marker389150	GGACAAGACACATAGGCTATTTGGTCTTAGGTAAGGGGGTATTCTATCCATAACCCTTACAAATCTTGTATTGAAATCAAATACAAATTCATTTGAGCCTXXXXXXXXXXCTTCTGATATAGCATATTGTTTGGAACTTCATTAGTTTTGATCTTACTTCAGCAAGCATTGGGTTAGGGTATCCAAGTATTCTGGTGAAATCCAATTATC
>Marker92047	CCTTGGAGTATTGCTTTATGATCCACATTGCCTGCCCTCAGACTGGAAGTTGTAGGATGCGATACACATCCTCATGTGTAATCATCATCTCTCCTGTAGGXXXXXXXXXXCTATTCAATCCTAGCAATAAAATTATGCCTTGTCCCTTGGGCCCATGTCCTCTCTGGACTTGGACGCCCTAGGAGGACCTGGGTGCCCTAGCTAGACTTG
>Marker314117	TAAGAGCAACTTATGATTAATGTATTTAAATTTTTATCATGGGACTAATGATGTTGGCAAGTTGTTGAATATATAGGGCTTTGTGTATTCAAATTGGGCTXXXXXXXXXXGAAAAGAACCTAATGTAGCATACTTTTACTAAGTGTTTTGATGTCCAATATCATCTTTTTCAATAGAGTAAAGTTTAAGAAGATTCATATGGAGAAATTT
>Marker269047	ATTGCATTTATTTTTAATTGTATGCACCTTCATGGGAGCCTTGTTTGAGTTACTCTCACTCTCGCTTGTCACCTTTAGCAATTGTTTGTAAGAATTACAAXXXXXXXXXXCACTTATTCATGTTCCATTTGCAACTAGGTAACTTTATAAGGATGTTTTCTTATTTTTCCAACCTAGCTTTTCTACCATTTTCTCTAAGACCAAGTTATC
>Marker190482	TTGCTATGTGAGTGACTAAGGCTAACATGCAAGCTTGTGCAATACCATGTAGATCATGATGTGAACAAAAAAAACTTGCTTTCCATTTATCCATTTAACCXXXXXXXXXXTCATGAAGGTGACCCTGCATAAGGGAGCTAGGTAAGTCATCATGACAAGGTTAGTTTGTCAAAGTTAATATTTCATATTAATAACCTCATGGTTGGAAAG
>Marker207098	TAAGGTAAATCTTCTCAAGATTTTTAGGCATTTCATGATAAGAAGTAAATGATATGGGAGAATTGACATTGAAATATGCCATGATTGGACCTTAGGATGGXXXXXXXXXXAAAAATATCACCTGAATTGGACCTAGACCTGGTCACTCAACCACTATTATGAGCCATATTTACACAAATCTTACCTTAATTCCAATCAGGCCCTCCTTCT
>Marker428338	CTTTGACAAGCTTAGTTTAATTATTCAACTTATTTTCCCTTTACCAACACCCAATAGCCTACGGAAAAACTTAGGAAAGTAGGCTAAGGGTCACCAACAAXXXXXXXXXXCATATGGACATCTGCCAAAGCATAAAGGATAGAGGAATTTCATTATTTTATTTTGTAGTTGTGACTGCCCTGGTAGACATGTGTGCAAAATGTAGAAGCA
>Marker230391	AGAAATCAATGAAAACTACTCAAGATTTACAATATAACAATAGTTTGCAACTTCATTTTCATTATATATGTAGAGGATATACAAATATACATTGATATGAXXXXXXXXXXGTATTCTCCAGCATCTTTACCTTTGCATCTTCATAAATATTCTATTCCTCGGCATCCAATGAGTCTTCACCTACCATCATTCCTCCAAAGTCTAAATTCT
>Marker128890	TGGTTTTCTGGTGTTTATGTGAAAGACCTAACAAAACCATGTGTTAGGTGATGTCTAGAAGCATAGGAAAAGAGTAAAAGAGGACCAATCAGTTGCAGTCXXXXXXXXXXCCTGATTGTCCAAGATCTATATTTGAAGGTCTGTAACAAAAGTTATTGATGATTGTTCTCTTTTATAGGGCTATAAGCAATATCTTGGGTTTTTTAAGGA
>Marker160215	TACTATTTGATGAAGTGTATTTCATGCTCCTGTAGAAAGAAACCTCTATAATTTCATTGTTTGAAAACCCTCTTTCATATCTACCTTCTATGGCTGCCATXXXXXXXXXXTTTTCAATGGCTTAGACTGCTCCATTCATTATGCTGGTAGACTATTCTTTCTACCTTATAATAGTCTAATCACTGTTCTCTTCAAGTGATTCAAAATGAT
>Marker634474	AACCATAACATACTTCAAACTTTCAACTGCACTCTAGTAAGGCACTCTACTCATATATTCTATCTTTGATGGGAATGTTGGACATTGTGAAGCAAATAACXXXXXXXXXXTGCAATAAACAAGAACAATCACCATCAATTTTATAATAAACATAGTGATCTGATTTAGAGCGTTCAAATCCCAAACTAAACACATATGTATCAAATTTAT
>Marker161253	ATCACTGAAAGCTTCTGAAAATCAAACACATAAGCATCAATTGTATGCTTTTGTTTCAGTTGGGCCAACTCTCTGAAGTGAAATTCAGGGTCTTTCTTATXXXXXXXXXXCAACAACAACATTAGAATAAAACACCAAGTGCTCTATCCTCTCTTGAACAAAGCGTCTCGAATGCTAAACGTGATCAAACAAGAACACTCCAAGCTTCCT
>Marker394614	TTAGAGATGACTCTCACCTAAACATTGTTGGCCATGGATGAGTCTAGATTCAATTCCCTAATGGATGTGTGAAGGGGATCAATGGTGTATTGCATATCCTXXXXXXXXXXTTGATGGTCATTCTTTCTAGGTATCTGTTGGTAAATAAATTTGTCACTGCAGTTATTGCCTTAAAAAATAGCCCCGACTCACATAATGGGCAGCAAGAAA
>Marker208422	ATTCTTTTTAAGAAGATGGGAGAATGACTAACACTTGTCAGCAAGCTATGCAACAAACCTTCTAATAGTAAGAAGTTTCCCCTGGAGGCTACAAAGTTACXXXXXXXXXXTAATCTTCCATAATTCCATGGAGCATGATAGGAAAGATAACTATCATAGCTCTCTAATATGTATCCCCTACGTTCTTCAACCCAAAAGGCATTACCTAAT
>Marker323686	TTAAAGCATGATGCATAATTTTTTATGCTTATGAAGCTTATTAGAGCCTAAATGTTACCTTAAACTAACACATTTTGATCTTGACATACCATGTCAACCAXXXXXXXXXXAGCCTAATCAAGAAGAGTTGTTAAGATAATCAAATGCAAGAAATTAATTATAAAATGAGCTTGCACGCAAGTGAACCAAGTTAATCCACCCAAGTTTGAT
>Marker149701	TTGATGAATGAAATTTATTATCATTTAAAGTGTGAACATTTGTATGTTACACGATTGAGTGTTTGATTTCAATTTAAGTTGCTTCAACTATATATATGTTXXXXXXXXXXTCCTTGTTGTCCAATTTAGGATTTGTGAATTAGGGGATTTTTAAAAGGTGTTAAATGGTCTATTTCTTGGTTATTTTATTGCTTTTAAGGCCTTAGACTA
>Marker172999	AGTTCTTTATCTTCTCATGATGAGGTTGATGACTCTTTAATTCATTATGATTTGGTTTACGTTACACATCTTTCCAGAGCACAAATGTTGGAGTCATTTAXXXXXXXXXXATTTTATTCATCATGACGATATGCCCATTGTGAATTTCCACGGAGATCCTCTTTTGGATCCTTTCATGTTTTCATATGATGTATCTTTGAGAAATTTTTG
>Marker127239	CCACCAAGAAATCCCACATCCCAACATCCCCATCCTCAACATCCCAGGTTCAATTGGGTCCCTAAATCCCAAAATTAGCAATTCCAAAATCCCCCATCCTXXXXXXXXXXCCTTTAATCCACACTTTTGCTTAATCCCATCCATCCTCCATCCACCCTTCCTTCCATCCCATTAGCCTTGGCAGTATCCTCTACACATCAAAGCTATGAT
>Marker288296	GTCGGGGGCTTGATTATCTTGCACTGCATATTGTAAAACTGGACGGTTTACTGCCAATTCATATAGCATTTCATATCTCAACCCGTTTTGACATGAACAAXXXXXXXXXXTATAAATTTCAGAATTGAATATATAGTTGTTACTTGCCATTTACTTATAATTCATGATCAAATATGTTTGGCAAATCATATTGTTGCAACCCCGGATGGT
>Marker303775	ATTCAAAGGCAAAAAAAACCATTCTATGTTCCCAGTTCAAGTTGCTTAAAACTTGATTTATTTAAATTGTGATACATCCATAAGCATTGAGTCTATCTGAXXXXXXXXXXAAACGATGAAAGCTTGTCACTCTGAGAAGAGTATATGAGCACACTCCATGGCTGAAAATTGAAATCACTCGAGTCTGAAGATTTTCTGCACATTTGTTTT
>Marker61593	GTTATTGGCATGTTTAAGGCTTGTTGCCCTGGGGGCTATTTTGTATAGGGTTCTAGACCCTCTTTTCCAGTTGAACTAATAAAAAACTATTCAAAGTTGTXXXXXXXXXXCTCTACATAAATTTTCCATGTAAGAACCCCCCAATTTGGGAGTAAAAACCTATCTTGTAGGCGCCAATATCTTTCTATAATATTATATTATTAATTGCAT
>Marker50902	AAGAAAAGAGAGAATCTCCCCCCTTCCTGCTGACCCTTAGGATATTTGGCAAGAACCTTCACAACTGCTTGGTTGACTCAGGGGTTTCCACTAATGTCATXXXXXXXXXXTACATGGCTACTGACTTCTCTCATATGTGATTACCATAGAAAGGACTTTTTAATCAAATTTGCATTGAGAGGGAGCCCAAGATCAAGCACATGATAACAG
>Marker382939	GCAAGCCATGAATAGTGAATCTGAGTGTAAGACTATCAAGCTTGGTAAGGTTCAAAAACTAAGTTATTCATTTGCTATGAACACAAACGTATGAAAAATGXXXXXXXXXXTATAGGACAATTATAATCTTCGATCTAGATGTTACCTATACATACCATCAAATAATTGGTCATCCTTGATTCTTGTTTAAAGAATAAGAACAATAGATCA
>Marker430283	AAGCTCTAAAACAATGATTTAACATTCAGAAATGTAGAAACAAGGGTATCTTTTATTGATATCACATCAAAATGTAACAACCCACATTTTCCAACCTTCTXXXXXXXXXXCCTTATTACAACATCAAGACACCCAACCAAAGAAAATTTTACAAAAATGGCCTCATGGAGGCATGTAGTCAAACAGATGCTCCTGCACCAACACGTGATT
>Marker248307	AATTTAGTTATTCCATCAATCTATGGGTAATATGCTAAGATAAAATTTAAACCTATATTCATCTTCAAGAGGTTCTCCAAAAATATCCCACAAACTTAGTXXXXXXXXXXGGAAGTATTGTCCATCAAGGTTGATAAAGTTTGTGTTGGTATCACATTGGTTGGTGTCACGTTCATCATTGATATCAGTGTGGAGTTCGTAGGTTGGGTT
>Marker344397	ACCTTTACACCTCATAAGTCATCTCCTTCCACTTCCAAGCTAGTTGTTGTTGGAAATATGTGTTGTCATTGATGTCAAATCTATATGTGTCAACTTGAGGXXXXXXXXXXGGAAAGTAGACCTATTCTAATATGTCTTCTATATGTCTACATTGATATCCTATTAGTTTAAGGTATCGCACTTAAAGACAAGTTGCAGAAGTTTGGCTAA
>Marker179456	TGAATTATCAGCTATACACACTAAATCATCTTTCATGTTACATTTGAAAATCTTCCTACTCGAACGAATGTCTTTTAGGATTCTCTTCTCCCTTATTGAAXXXXXXXXXXTCTGTTATTTGTGATAAAATTCCACATACTAAAGCCTTTGTGTGGGTCTTTCATTGTATAGATTCTTTCCTTGTCTCTAGAGTCTAGATATTCAGTTTTG
>Marker171782	AAAGGAAAGACATTATGAATATTACCTCAAAAAAGGATACTATAGAGGCTGCAGAGAGTTTTTTAAGTGAAGGGATCAAGCCCCTAGATTGAGAACCTACXXXXXXXXXXGTATGGTTGTAGGGCTAGCACACTACGAGAGCTAGGAACCATACCAAACTCTTATGGGTCACAAGGACTAAAAAACTGCGTTGTGAGGTGACTCACAAAG
>Marker233349	ATGCGGACCTAAAAAAGTTAATGGATGGAAAATTAGAACTATTGCAAGTATGTGCCTAACTAGTGTTATCATTGATGTCAACATATCTGTGTTGTCATTGXXXXXXXXXXGTATAATTGGTGATGACAGGGAGAATGTATTATGCTCTGCATTCCTCTGCATTTAAGTATTTTAGTCTGTGGTTCTAGAATCAAGTTTGTAATGATGATA
>Marker195940	GTGAGCTTCAGAGTATATGATCGAGAATTATACCCTTTCGCAGTCACTAGACAATGATAGGTAGATTTTCAATGGAGTGTGGAAAGCTAATCTAATCCTAXXXXXXXXXXCACATAATCCAAAACCCTCATTCGCTTACCACACTTAAGATTTATCAAATTAAGCACAACATCCACTAATTCAAAATCATATGTAAGGAAAAGAAACACA
>Marker52474	CCATCATCAAGTGCATCGCTTTCTGTATCCTCATCATCCTGATGACCTCGACCCTATATATGAGCTTGCATGACTACCTTGACATTCTCATACAACTGCAXXXXXXXXXXTTCCACCTTTCCTTCCAACGTTTCCAGAATTTCTGCCTCAAAAGACATCATATCATGTAACTTCATACTGATTTCTCTCAACTTATTGTTGCATCTTTTA
>Marker278973	TTTTTCGTGGAGGATAACTCCCTTAAGAAAACAAGAGGAAGGTGCTAGTAAATATATGGAGGGGTCTTTGGGGAGGGCACTGAATCCATATTTCCTATTGXXXXXXXXXXTGTTTGTGAACTAAGTGCTAGAAAAATAATAAAAATTGCAAAGAAATTAAATCCATGCAATGGCTATGTTTGGTTATGATGTCTTGATGACATGATGAGT
>Marker58349	ACGTAACTCACAACCCCTAGTTAACTTTGAAGCATCATCTTGTATCTTAGGCCATAGGCCAACAGACATAACTTTGCAAATTTGATCATTTATTGGCAACXXXXXXXXXXAACATATCAGCCAACTTATTAATAACACCTTTCTAGCATTTAAAGACCAGATAAAATTAAGGAAACCCATCCATTTATGATGTTGTTCTTGTAATTTAAT
>Marker52301	CTTAGTGCATTTTGTGAGTTTTGTGAGCTTGGGACAGTCAAACGTAGTTAGTCTAGGGTCCCTAGAAGGTTTGGGAAGGTCCCCATATGTTTGAACCTATXXXXXXXXXXATTGCATGATTAAGAGGATTTGGATAGTGACAAAGAAGTCCAACATATAATAGGAACTCAAGAGCTAAAATTTTGAAGCTGAGATTCCAAAGTTGGATGT
>Marker154722	TTTATTCTATGTTTGTTTGTGACTAACATCATGACCAACAGAACTCCTGACTCAATTATTTCAGATAATGCTTTAGCATTTATTAGATTAAGAATATCTAXXXXXXXXXXTAAAAGAGCTAGAGTTACTTGAAGAACAACTAATGGAAGTCAAGCTTGCACAGCTGATTAAACTTGAAGAAATCAACAAAGAGACCTTGAAAACATTAGA
>Marker195889	CTGCCCATGTCCTCCACCTCACTAGGAGATTTTGGACAATCACTAATAGACAACTTTGTCCCCAATCAACAACATATCATCAACATACAATGCAATAATGXXXXXXXXXXTCTAAGTCATAAGTAGCTGCAAGATATAACAAGAACCGAATGGATGTCAGCTTTGCAATGGGAGAGAAAATTTCACCATAATCAATTCCCTCCACTTGTG
>Marker357921	ATTTCTGCACTTTTCAGATTGTTGGTTGAACCTCCATCTATGATTACCTTGCATACTTTGCCCTTCCACTAGCATTTTGTTCAAAACACTCTTCCTTCTTXXXXXXXXXXCTACCTTTGAAGCCTCTCTTCCTTTAGAGTCTGGCTTCACTTCCCAGTTCTCATATTCTTCATTCTTGGCAGTTTTTCAAGTTCCTTTTCCTCTAAAGGA
>Marker202191	CAATTTATCATAGAAAAATGGAAGAAATTGGATCTTTACAATGAGAATATTGTGAATTTTTATGACATGCAAGAACATAGTCAAAGATAAAATGCAAACAXXXXXXXXXXGTGGCTATGAATAGCATAGGAGGGTTCTAACAAGAAATTTAGACTAAGTGGAGGTGGTTCATGGAAAAATGCGAATAAAATTTTATTGCTTGAAAAAGTT
>Marker297981	CAAGTCGGCTCACCACAATCCCAAATATGAGAGGTTAATGCATCAACAAGTCTCAACAAGGTAAGATTCTAATAAAGCCATTTTAAAGTGTATATAAATCXXXXXXXXXXTATTTTAAAAAGGTTCCAAAGGGTTTAACATCCAAAGGGATAGGAATTATGGAAAATCTTGCTTTTTAATTTTTGATCTGGTAAGACTAAAGCCCTAGAT
>Marker260521	ATAGTGAAAACTTGGCAAACAGGTGCTATGTGTAGGAGTCAGCACTACCATCTATTCATTCTCTTCCTATCCATCCATATCATTACATAATAAAACCCATXXXXXXXXXXTTTTTCAACATCATACATCCTCACTTTCATCACACATCATCAATCGACACATTCATCACACCACCTAGAACTACATATCATCATCTCATCTCAATCTTAA
>Marker153744	TTCAAAGGTCTAATAAGACCCTAGAAGAGATAATGGGAATATTTTTGGAAGATCTTGCAGATGCTATAAGGAAGAAAAGAGAAAGAGCAATAGAGCTAGAXXXXXXXXXXCCAAGTCCACATACTGAAGAAGGAGAAGAATTAGAGAAATAACAACAATCATCTCCAACAAGGGAACCATCCTCTACTACATCCCCAATACAGTCAATTA
>Marker241868	TTCAGCTTCTTCTATGCAATGCAGAATAGGTAAAGTATGACCAAGATGGTCACTTATTATCCAATGGCTAGCTATTGTGCAGAAATGCATTCCATTATTTXXXXXXXXXXTGAGGTTAATCTCAGCTTTTGTCATCTTGAGCACACTAAGAGAATATTAAGTTATTAACTAAAAGCATGCAAAGTATAAACCACACTGATTTGCAATAGA
>Marker368521	TCCTTGTTGGTTTTTCTAGTTGGGCTGTTGGGCATGTGCTATCGTTCTATTTTGTGTTGTTAATATAATGTTTTTGGCACGTTTGAGGCCTTTTTGCCATXXXXXXXXXXATTTGCAGATTCAACAGATTATGTCCCTCTTCCCGATCTTCACAAAAGGGTCATGGAATCTTGGAAGTCATTGGTTGATGGAAAGATTGAGCTCTTTCCC
>Marker321807	AGTGTTTGCATTTACAATCAGTGTCCTTATGTAACTATAAGTTCTTATAAGTTTCAATAAAATGGCTTAGATTTTTGATGCTGAGCTATTAGGAGGAATCXXXXXXXXXXTAGGTAAGATTCAGTGAATTTGTATGGCCGTTCTAATGGATAAGAAAGATACATCAACAAAAGACATGAAGAAACTTCTGGCTTGTCCTTCTTGAAAGAA
>Marker224052	CTAGTTGATGATACATATTTTCCATCCTCCTTCACTATTACATGTGATATGCATATGCATATGTATATGAAACATATTGAGAATGATCTTTCACATTATAXXXXXXXXXXTAAGTTGTTTGTTAGATTGTTTCCAACAAGCTTGAGTGGTCATGCATTTAGCTCAAAAGATTCACTTAATAAACCAATAGCATAGCACATGCATTCATAG
>Marker235698	TTTATTTTCTTGAGCAGAGCAAGGGTATGAGGTTCAAATTTTCACTGTTCTTTTTCATGAATTGCATCTAGTGTCTTCAAAATAGTGTTATGGAGCTTCTXXXXXXXXXXTTTGTGTTAGGAAGGTGCTTGTCCGCATTCACAAGAGGAAAACCCCTTGGCAAATTTATATGGGTATCCATCATTGCTGTTAAACTACGTTGCCAGTTCA
>Marker91115	ATAGTGAAAACCTGACAAATAGGTGCTATGAGTAGTGTCAACACCTACCATCTATTAAGTTGTGCATCCATCTCATTTCATATCAATTCATAATAAAACAXXXXXXXXXXTCCTTGTTTGAGGTATGATCATGTCACCAGTCTCACTTCATCTTATCCTACATCATCAAATCTCCTAGAACTACATATCATCATCTCATCTCCATCTTAA
>Marker125307	CATTTTATATATATTTATTTTCCTTAGATGCAAATGAAGGACCACATCGCTTTACAAACCTTCTTCCCGAAGAACAGAAAGTTCAGGTGATAAGTGAAAAXXXXXXXXXXGGCCAAATCTCCCATTATATTTGGAGGTGACTTAAGGCATATTGATAATGCAACCATGGCCCTCATTACAAATCCTACCATACTTGATATAAATGCTAAC
>Marker563460	CTTGTAGTTTCACCTTGATCATTGTGTATGATTGTCATTCCTTGATCATTTGAATGCTCAATGGTATCCATTATGACTTGCTTTTCTACATGCTTGATGTXXXXXXXXXXCTAAAACATTTTACAGTCACCTAGGCCAGGTGTGTTATCATGGTGATTGAAAGAGGTTTGTCAACAAGTTTAGGACGATTTTGACCAACTTACAGGAGTG
>Marker368659	CAAATTCTTTGACACCAAAGATACACTTGGAAGGCTTAGCATACAACTGATGCTGCTCCAAAATGTCCAATACTTGATTTACATGTTGCAAGTGTTCCTCXXXXXXXXXXATAGGAAACTTATCTTTTATGGTGAACTTTTTTAGTTCCCTATAATATGGACACATCCTCCAAGTTTCATCTTTCTTGTGCATCATTAGCATTGAAGATG
>Marker125332	TCAATCAGAGACTATCAAACATATTTTTTTCATGATGATATCCCTTATTCAAGTGGACTTGAATTTTGTTTTCTCTGAGAGTATGGTGCAGGAACACCTTXXXXXXXXXXTGGAGGAGTTTTATTTCATTATTGTTGTAATAAAGGTCTAAGACCACTCTTATGTATTTAGAGGTCATTTGATAGTGGAGCTTTAAGTTTGCTCAAGTTT
>Marker45593	TCTCAAAATGGTGGGCAGAAATTTTGGACCAATGGCATGCTGAATTGATTTTCCTTTGGGGTGCAATGGTCGTTAGATGAAGACTCTTTGTAAAAGATGAXXXXXXXXXXGTGAGACTAGCACTACCTTTAGGATGTGAGGGTCTACCATGTGTCTAATTATTGTATCGACTCTTCATATGTATTAGACAAGTGGTAGGGGCCACAAAAA
>Marker139662	TGTTCTACCCCTTGACCTTGTTCTTAACCATTAGAAGCTTCTAAGCTAGCTTGAACGTGGGTGTGCCTTGGACAACAACATTCCACCAACTGGCTAACCTXXXXXXXXXXCAGCTAGGTCCATCATGCTGTCAGTGTAGTCTAGGATCCCACCACTTTTTTCGGAGGGGAAGAGGAGGGTGTTAAAGTCCCCAGCCAACATCCAACATCT
>Marker260979	GGATAATGGAATTTGTTGCATAGCTCATGGACTTCTTGGTTCTTAAAAGGATGTCCATTATTAGTGATAATGGCTTGTGGAACTCCATATCAGCAAATGAXXXXXXXXXXTTTTTTTGCATCTTTCTCCATGGTTGGCCAATAATATCAAGCTCTTAATAGTTTCTTAGAAAGGTTAGGGCCAACAGAATGTGAACCACAGACACCTTCA
>Marker117216	AGGCTTTCAAGTTGTTGTGGCCGTGATGCTCCAAGTCTCATATGTCTTTGCTTAAGGCTGTCCTAGTTTTAAATGAGCGGAGTGTGTGGATGTAATTAGTXXXXXXXXXXAAGTGAGTTAGGTGAAGAGTGATTGCAAGTGATTGATAAGGTTCGCAAGCAAGAAAAAGAGCAGAATGATTGCATTATGATGTGCGATTGAAGGAGAAAG
>Marker218601	GGTGCGCAAGTCTTGAGGCACCTTTTTGTTCTGGGGTGAGGCAAAAAATGGGCCCCTAGTTCCCAATTGTCATGGGTTTTAGGGATTTTGTATCGGGATGXXXXXXXXXXGTCAAAAAATAAATCAGGGTGTTTAAGGTCCAAGTTCAATAGGTTTAATCTAAATCCTTGTGGTTGATTTTAGCTTTGGGAGGAGGGGTTATATGGTTTA
>Marker271338	TTCTCTAGGGACTAGATGAGAGTTCTTTTTGATACATACCTAAGAGGACTTACAATAAAAAGACTTGGCAGATGAATAATAAGAGGTGAATTATGAGGAGXXXXXXXXXXCAATACCATCTGCTTCTTGGGTAACCAACTTATGAGGAATGAGTTGCATACTCCAACTTTCCAAATCATCTCACTCTAGTGTAAAATCTCTCCTCAATAT
>Marker360129	TAAATTTTTATAGAGATCAATCTATGTGAAGGTTCAAACCCGGGCTCATTTATGTAGTTGCATAGATCACTTCTATGATCATGGAAGTGACCTACTATGAXXXXXXXXXXATTAAATAAACAGTCAACCTGGATATATGAGTTGGGACTAATATGAGATAATGAACTTAATGCTACAAGTAATGCAAAAATAAAATAAATTAAACTTGAA
>Marker380528	ATAATTAGTTACAATCAACATAAACTTATGTTTGGCTAAATAATTATGATTGATAATTCTAATAAAATCAAAACCCTTTTGTGTAAAAGGATGGATCTCAXXXXXXXXXXTTTAATCAATAAGTTTCTTCTCTTTAGTGCAGTTCTCTCCTCTAGGTGGAATTCAAGTGACTTGGACATTTGTTGTAGCACATGTAGTAAAGTAAATCTT
>Marker212360	CCTGCAATCAGAAGGTTCATTGATCTCAAAACTAGTTGAATGAAAGCAAGAATTTAACTAGAATATAATGCCAATTTTATTTTGTTTGAATCAAAGTAACXXXXXXXXXXCAATTTGATTAAAACAAAAAAAAGATGCCATTTTTTTTCTGATATTATGTAAGAAGGGAAATAATATAGGTTAAGATTACTGTTGAGAGTCTAAATAAAC
>Marker388816	ATCTCAAAGTTGATGATTAATGAGGTGGTGGGTTCATTACTTTTTGAGGATAAAAGGTAAAAAACTTCATATTTTGTCAAAGATGCCTTAATAGTGAGAGXXXXXXXXXXATGCATGTGCACTTGAGGGTGCATGGATTATTGAATCTAGAACCTCTTTTCATATGACTCCTAATGAGGCTAATTCTAGCCTCATCAATTCACTAGATGA
>Marker67045	CTTTGAGAATTTGAATTCGTTCCTAGCCAATAGGCCAACTCATTGATAATGAATGAAGAGAAAGAAAAAGTGCAAGAGAGTTATTTTTTCGGCAAGTTAGXXXXXXXXXXCATAAAATTCAACACTATTATTACAAAAGAATTCCCACAAAACTCAGAACTATTTTCAAATTTCTTCTCATTCCATTCCATCCTGCCACAACTGAAAAAA
>Marker291565	CAAAATATATGGTTCAACATTTTGAGTCTAAATATCCTCAAAATCATAAATGGTAGAAATAGGAACAACAAGCTTAGATCTCTAACAAAAATAGCATATGXXXXXXXXXXTGTCAAACCCGATAGGTTCTTTCAAGCTCGCCCTCAAAAATGAGTCTGTGTCGAAGTGGACCTTTCACGGGATTTGAAAGAGTCCATTGATATTCAAACT
>Marker301583	TATTATAAGTTGCATCATCCAATATGTAGGGAGATAATAGGCAAGCCACACCTTCATATTGAGTATGTGTTTTGATTATTGCATCTTTAAAAGATTGAATXXXXXXXXXXCCTTGATTTCCCTTTGTTAATTTGTGTCTTCCCATGTTGAGTGAGGTATAACAACTCAAAATTTTCCTAAATAATGTATTCTAAATTTTGAACAATTGGG
>Marker149777	AGGTTTTGAAGAACTTAAGCACATGTATGAGGATGATCTTGATTTTGCATAAGGATGGAAAGCATGTAAGAAAATTGTTGGGATAGATAGAAGCAAGTGTXXXXXXXXXXACAAACCTTTGACAATAATAAAGTGGCCTTGGGAAGATATAAGAATGGGTTTCATATTGGGACTACCAAGAACATAGAGGGGACATGATTCCATATTTGT
>Marker520906	CCTGAACAACTTGTTTGTAGTTTGACATCAAGTAAGAACCACATCACAAAACCCACTATTGTGACATCCATTTTGACATCGATGGCAAGACAACCAATATXXXXXXXXXXTAGGATATGATAGGAAATGGTAGGATGAAAATGATAGTGTGGAAAATGGTAAGTTGGATGAGACAATGTGCCCCCAAGTGTAAGTGACATAGAAGGTCAA
>Marker152608	CACCCTATTTACATGGGTTCACGAAAGTTTAACCTCGATACTCATTCTGATCTTTTCCCAACATCTATTTCCTTCTCCCCTGGTGATACTCTCCTTCCATXXXXXXXXXXCTTAAGTAGATTGTCATGCATGATTTCCACTCAAAATAGTTGTGAGGAGTTAAGATGGGAGTTGTTGGTTGATCCATGATGCAGAGAATACAGAAAATGA
>Marker163671	CTCCTGTAACTCCACTTTTCATGTATCTTCAACCTATAACCTACAATCATAGAAACTTTGGGAGGGGGTTGTGGTGTTTAGAGGCTTGCCTCAGTCAAGCXXXXXXXXXXTCACGTAAGCAGAAACATAATCAACACATTTGGCACCAAGATTTTTGAGGTGGAAACCCGGTTAAAGGAAAAACCATTGTGGGTGTTAGCCCACAAGATT
>Marker337894	TGTTGTGCTCTTATGGTAAAACCAAGGATTGTCACCTTAAGGAATGATATGGACTCACCATGATGTCATCATGCCCATGTGACCCACTCACAAGCATTTCXXXXXXXXXXGCCACTATCTTCATGTTGGCACAACTTCCATTGTAGATCAAAGTAATTTAATGGTTTGCACTATAGTATATACTAGAAATTTCATATAAAACTTTCAAAT
>Marker308160	AAAAAAGGAAAACAGCTAACAAGATTTGTCACTTTGTTAGTGACACCCTTTTGATACTTGATTACCAGATGAAATTGCTGAATGTCAAATGGCCTCTTCAXXXXXXXXXXTACTTCAATACCCTCCCTTAATGGTCAATCTACTAACTACACAAAGCTTATCCCGAAATTTTAGAAATTTGTCAAGATTCAAAGACTTGGTAAGAATGTC
>Marker143654	CCTGGGTATTATGCTCTTCCATTATAATAGATCCTATATCCACTGCAAGTCCCTCCTCTACACTAACTCCTTATTGCATATCTTCTTCATCACTGCTACCXXXXXXXXXXCTCTTCTTACACTAACTCACTAAACACCACTGGTGTTTGTGTTTCTTCAATATGAACTTCTTTAATAGATACTCCTTCTATAAATGCACCTAAAGGGATG
>Marker268066	ACCATTAGGTAATTGCTCACAAGCACAAATGACTATGCTACAAGAACTATAGGTGCATTGGTTGTTGGCACTAAATAAATAGCTTTCCAATACCTTGTTGXXXXXXXXXXAAGGATGGCATGCTTCACACACGCCAGTCAACATACATTGAGAAATTAAATAATAACAAAACCCTTGACCAACTAAACAACTTGTTGTAGTCAACATTGA
>Marker166568	ATTATTAGCATATAGCATTTTTCATTGCTTCTCTCTTGTGTGGAAGGTTTTTTGGTGTTGCAAAGTGTTCCTACTCCTATGAGTCATTTGGGCGACTTCAXXXXXXXXXXGAATCTAAGGTTTGGGGCAATTTTGCATGTCCTCAATTTTCTTGGGATCATCATTAACACTTTCAACAAAGACAATATTGCCAAGATGTTCCTCCTCTAT
>Marker311699	GACATCCCCAAACTCAACAGTAGAACCACCAAGCCAATAATGGCTATAGACCTTTTCAAAACGACCAAGATTTCCAACAAAGGCTAGCTTTTCAACCAAAXXXXXXXXXXGATCAACAAATGCTAGAGCAAACTTTGGTAACATACAAAGATTGTGTATCCAATACAATAATTGAGCCTTTTGCAAACATGGAAAAACATGTTTGTTTCG
>Marker280716	AAGATCTTTACTAGTTCCTGACCGAATATTGGGAGCAGTTGTTCAATCAGCCTTAGGGGCTTTTTCTATGCTTTCTGTTGTTTGTCTGTTGTTCATCTGCXXXXXXXXXXGGGAGAGTTGATTTGCAGGATTCTTTGAGGTGAGTTTTTCAAGTATTGTGGTATAGAAAACATAGTGGTTTACATATGATAATGATGTTGTAAGTCTTGT
>Marker352442	TGCAAATTTTGCAGCTATATCTTCATCATACCCATTAAGTCTTTGGAAATAAGTGAACCACCTAGCCTATTGAAAGATGGCCAATGCTCTAGCATCATTCXXXXXXXXXXAAATGATGCTGCATGCTTGAACATCACGTTACATGATGTTGTATGCATACGATCATCGACAACTTACAAGGTGACTATGTCGGCAAGTAAAGGGTCGTAT
>Marker332636	CCGTCGCCATTGTGGACAACAAGGAGAAAAATTACCGCTATTAATTACTTGACATGTAAATGGTTGTCAAATTTAAGGGGTTTTTATTTACATGGTCACCXXXXXXXXXXCTATAATTATGGCCAAAATATCTTAATTACATAAAATGCAAGGAGTATACTCAGCTTGGCAAACATTCTATATCGTTTGTATACATTTATAGCCAAGGAG
>Marker360054	ATTTACCCAAAAATCATATCTGAAATCATCTAGAATGATATGAATTTGCTTATTGGAATTTTGAACTGCTCCATTAAAGATCGTCATCTTAGGAAAGTCCXXXXXXXXXXTTGCTTGCTCCACTTTGGATTTCAGTATCAGGTGTCTCGAACAATCACTTGGATCCCATATTCTTATAAGTTGTGTTCTTCACCTTTTCTCCATTCTTAT
>Marker93932	TTTGAATGTTTTCTTATCAGATCCTTTCCCTTCTCTCCTATATCCCTCATTCCGGTATGCACTAGGGTTTCCTCTCTGGTAAAAGTTTTTGTCATCTCTTXXXXXXXXXXGTATCTAGCCACTTTATCCTTGCTTTCTTCACTATGTCCTATCCTTATGATCATCTTGTTAGATTTAGAGTAGACAACTGAGAGGGGGGGGTGAATCAGT
>Marker87014	CCACCTGTATTGAGACTCAGACACATGGCGAGACCTGCGCGCTTAAAACTGAAAAGAAATATGATAGATGGCTATGTCCGCATCTACTTAGAAACTCCTTXXXXXXXXXXGATGGCGGCCCCCGTGCTCATGCTAGCTAACACATGGCAACTTCTGCAGCACTGCTGAAACAAATAAAACTATTGAAAGGTATTGCAAAAGTCGACACTT
>Marker274838	AAACTTGAATGTTGCAATGGATAAGATAATAGTCATATGTCCTTCCCTAGTAGAGTAAACCAAAAACTAGTTACTATTGAGTGGTTTTGTCATACATGTTXXXXXXXXXXCAACCTTCTACACTAGGCAAACCCAAAATGATACACAATTAAAATTAATTCAATCTGAATGTGAACCACCCCAAAATTATTGTAAAGATTATAAATTGCA
>Marker194444	TACAATACTTAAATTAGTTATTTGTGGGTCATTTACATCAATCAATCATCAAGAAACATATGTTATCCATCAATTGCCAAGAAGAAGCATCTAAGACCTAXXXXXXXXXXGATGATGATTCAATTCCTTTAAAGCTCTTGAATTCTAAAGTAGATAGTCTAGTTCTTTTCCAATCTCATTATGATGTGTTTAAATGCTAAAATGAGAATT
>Marker153705	CCAAATCACGTTTGCAAGAAAATGCACAGACACAACAGATTAAAATTTGGAAGCATCAAACTTTTACTTTACTTGAGAATGGGAAATGTCGAAGACTTCAXXXXXXXXXXATTATCTGCTGCAGGCCGTAGATGACTAACTTTGAACACAGTTTAAAAGGTAAGTAGGTTATTTTAAATTAATTTCATTATCTGCTGCAGGCAGTGTATG
>Marker372300	ACTTTTGTTCTCCCCCCTTTGCTATACCCCACTAGAAGGTGTGGTTGAGGTCATCCCCTAGGGTGATGAAATCCATAGGCAACCCCATAAAGGGAAAGGAXXXXXXXXXXAATGCAAGGAAAGAGCATACACACACCTTAGAACACACCATATTCACCAAAAAAAGAAAACACAAGTGGGTTTGAATGATAAATTTTGGACAATCGAACC
>Marker355928	ATAGTTAATCACTATTAGGACATACCTATGGCCAGCTTAGGATGGTGGATTTATTGCTCCTATGAAGTCCATTCCATTGTGCAAGGGACGTGTCTCCATCXXXXXXXXXXTTCATCATGTATTTCTGGGATTTTACTTTCAATGCTCTTCTCTGTGAAGACTTCATGTTTCTTGGATACTTCCCTGAGATTAGGATATGTTTGATACTAG
>Marker117653	ATGCCTATTGGTTACAACATAGGCCAGTCAGGTTCATAGGTCTTGGAGCACTTGGTGCAACAAGAGAGATGGAAGGCCCCAAACAGGAGGCCAGAGCATGXXXXXXXXXXCAACAACACCACCACCACCACTAGTAGATGATGGGGTTGTGGCAAGATTGACAGCATAGCGAGATGCCTTCATTTAGGCGAGATTAGCAGCTGAGGCTAC
>Marker484877	ATGTTGTAAATACTTGATAATAATATGCCACTTCGAGGGGGCAACTTTCAAAAGTCTCTAATGAAGAACATAATTCACAATATAATAATGACTAACCTCTXXXXXXXXXXCAACTAGATGTTTCTACACAAAATTTTCATCTTTCCATGTGGCCTCTTCAACTAGTAAATTCTTCCACTATATGAGATACTTGGTGATTGTCCTAGTCTC
>Marker162183	TAATTTAAGAAGAAATACATTCATCCTTGAGTGAATCAATATCTAATATTCCCAAGGTATGATCTCAATGATTATTATAGATGACATTTGCAGAATGATGXXXXXXXXXXTAGATTAAATTTTTACACTCCTCCACAATAGGGAAAAAACCCTTGAAAAACTATCCCAAGACATGGCATCTTTGAGAGATGAAAAGTTGCAACCAGAGAA
>Marker176951	ATGGTGGCTGCAATGATGAAACGTTTCAGCTGAAATCTTTCAACTTCTTCTAGCAAAGGATATTCTCTTAAATTATGCCAACTTGCAGTTGTTCATGATTXXXXXXXXXXAATTCAGTTCCGACCTCTCGGGTGCTCTCTAACTTTCTTGGAGAAACATGCTATTTTTAGATGGTCACCCAACGACCTCCGATTTTCATTCCAAGTCTTC
>Marker232932	TAGATTTCACCAACATAGTTAGGTGACTGAGTTTTTGTGTTAGAAACCAAATCTCTTGTTGCAATGTAAAGTTATTGCAAGTAATACCATCTGAACAAAAXXXXXXXXXXAGCCTATTTGAAATTGCATAGCACAAAGAAAAAATGATAAATATGAGATGTAACTACTTCCCAAATTAAAAAGGAAATGCAATCATTGTTAATTATATTA
>Marker189110	AGTCCTCTATGCAAACTACCTCTAGTTCTTCTCACTTCTAATGATCTAATTTTAGTGTTCTTGCAATCCTTGCACTACCTCAATGGTTGGCAGTCTGAGAXXXXXXXXXXTTGCAAATCCTTCCGCACACATCAAAATCTTCTAGTTTCTTCTTCGCATACACTTCTCCTATACTTCTCTCTATTTCTTTATCCATATTTACTTCACTTT
>Marker419750	AAGGACCTATGAATGCTACTACAGAGGCCATTTGGCTTCAAGATATCTTGATTGAGTTTGACATCTCCTATTGATGACCATCGATCATCTATTGTGATAAXXXXXXXXXXCACAAGTCTACATTTGGCTACAAGTTTCACCTTGGATTTAATCCAATTTTTTGGTCAAACAAAAAGCAACATGCTATTGCTCTTTCATTTATAGAGGCAA
>Marker125890	TCGGAGAGGCATTACTAAGAAGTCTCATGATCACTAGAGGCATGCGGTAACACTCAGGAATGGTCACCTAGTGGTAAACAAACGTAGGACGCTAGCGTATXXXXXXXXXXCACTACGTGCATATGCAAGCTAAAGTAGAACTAAAATAACATAATATATTTTACCTCCAAAAAGGATTATTGTAAGGATGTAGATGGTTCTTTGAACAAA
>Marker234687	CTCCATAATCATCCACTCATATACAAATACAAGAGCCTACTAGTCCTATCCACAAAATGATTCTTGGGAGGTAACCCTACAACAATTGGTCCAAGCACAAXXXXXXXXXXCTTCAAACATCATTTCCATTCCTTCAACCCCATCATGTAATCCACAAACCCATCAAGCCTATTGAAGAGTCTCCTACCATGAGTCCAAGTCAAGATTCGT
>Marker228639	TCAAACCTAGGGGGGTTATGATTTATGTATTTAGGATGTTTATCTAGTAGTGAAATGGATCCTTAAAGCACTTGATGGTTGTAAGCCCTGGAAAGTTCTTXXXXXXXXXXAGGGGCTTTGACAAGCCATTAACCCAGGTAGCAAAATGAACAACACAACAATGAAACAAAAACCTCTTTATTCATATGCAATAGAAAACATTACATCATG
>Marker272460	TTTACATCTATTGTGACTACTTGGATGGTGTATTCATTGCTATAGTAGGCCAAAGGATTTGAATTTGGGTTATTACTTGCATGAGTAGTGATCTTACATGXXXXXXXXXXATAGTCTTAGGCAACAATTCATGTATTTTTTAATCTTGTCTCTCATATCTCCATTGGCTATAATCTCTTAGAGAAGGAATACAATGTAGGGCTCTCTTTA
>Marker389464	ATATCCCAATTCATGTCTTTATCTTTAAGTTGTTCATATTTAGGATCATCTTTGTTTGGTTCAATGTTTGCTTGTTGAGTTATATGCATTATGCTCTTGAXXXXXXXXXXAGGAGGGAGACTAAATATCTTCTCTTCCTTAATAATATCCAAGGTGTGTGAACAAACAACTAAAGGGACAAGGCTGGTAGGATGTTCCATAGAGGTTTCA
>Marker492733	AAGCACATGCACACACACTAGCTAAGAAAAAAAAGAGTCTAGTTGTCTTTAGGGCCATCTTCTTCTCTAGAGACTTTCCTCTACCCCAGGTCTATCTTGTXXXXXXXXXXAAGAGCATTCACATTGTTTGTTCCACATGCATACATCTCAAACATTCAAAAGCAATAATTTCATGTAATAACATAGTGACATTCATAACACTTAGAACAT
>Marker186955	TGATAGTTGACTTTGATGTATATGTAAACTGATGATAATTATATATATGATGCTTTTCTATTATTGCTTCTAATGTTGTCTAATCTATCACATGTGATTTXXXXXXXXXXGATGTGTTTTGAGTAAAATAAGGTCATGTGAGACCATTTGGGGTCAGTCAAGACCAATTTTGATGTTTAGGGGCAAAATATTGTAAAAAAGTGTTATTTT
>Marker375717	TGTTATATTTTGATCTTGCACAATTGGATAATGATGCAAATCCTACATGATTGGTTGATGTTCTTTATAATATTTAATTAACAAGCCCTATGATTTAGAGXXXXXXXXXXTAGTATGTTGCCTTCATCACATCCTACTAGTGTTGTTTCCTTCATCCCACCCACTAGTGTCATGCATACTTCTATTACTTTTAGTGTGGTCACCACTCAT
>Marker120320	ACCTTCCGAGGTTACAAACACTACTAAATGACTCTATGCAACTCAAATTGTTCCCAAACTGTTATGGTATTATTCCGATGTAAATTTCAGACTGCTGCAGXXXXXXXXXXTGCAAACCCCCTCCAAACCCCTTGGCGCCAACATTCATCACAAAAGAAAACTGAAAAGGTAGACGCTTTGCATACTAGGCCCTCATGTCCAGCTACAGGA
>Marker234185	TTATGATATATTTTAAGTTATAAAGTCACATGACTATGGGCGCCCAAGTATAAGGAGAAATAAAGTAATTAAAACTCACAATTCCCAAAAAGAGGGCGTTXXXXXXXXXXAAGGAAATATCTAAAGTTTTGTCACCATAATTATCAGAAGATATTGAGGAATGTATTGCAGGTTATGGCATTGTTTTTGATGGCATTTTGATGTGTATTT
>Marker98288	AAGGGCCACTTGGAGTTAAATGTGCATCTTGTTGCAAAGGTAGATTTGGGCTCATTTGAGCTTGTTGGGGAGGCCATTGATAGTCTTGACAGCTAGGTGTXXXXXXXXXXGGCATTCACTTGGTGGATAGGTGGATTAGGTTGATAGGAAGTGGATGGATATGATATGTGGCAAGATGGAGTAGGTTGGGAGTGAATGGATAAATATTGT
>Marker114792	TCTCTCACTAAAATTCTCCCATAGAACCTTCACTTGTGTGATTTTCCTATTTCAAAATTTGACTTGCCTATGATCCACAATCCTAATGGGATCCATATAGXXXXXXXXXXCTCCAAGGGGGAGGTTGTTATATGGAGCCTAATCAAACTCGGAGGTTAAATTTACCCCACTTTTATCAGTGCGATTTCCCCCCAAATTATTTAATGGGGG
>Marker116827	CATGATCAAGCCGACAACGTAGAATACATTACATACAAGCTTCATTCCTACCTTGCTGACCTGATTATGAAATGAATCTTGTTGCGGATATAAATACTTGXXXXXXXXXXTCTTCTCTCTTGGAAGTAATCCTTTGTGTAGTGAGCACTTCTTCATAGGGCAATGAGTCATGGGCAGTCAGCCCTAAGACAGTGAGCCTTCTTGTAATTT
>Marker214922	ACCCCATCCCTTTGAGAACTCCCTAAGTCTCCAACATGTGACATCCCAACCAAGACCACCCACTTATCTTTGTCGACTCACCTCATGTGTCTGATGACTCXXXXXXXXXXACTACAATCATTACCTAGCTAGTCACACCTTCCGGTTTTTGTTTGCTCCTCAGATCAATGACCCAGTCATTTCCTAACCTCTCAACATGTAGCCCATTGA
>Marker269785	TCTCCAACTTTAGCCACTGTTGCATCCATTTCCTCTTCTTCATTCTTTTCTTCTTTGTTGCTCATGTCTTCATTTTTACCCTTTTTCTCCATGCCTTCCTXXXXXXXXXXTGGTAAGGTGATCAATTTTGTGTTTGAGCATGATGCAGAGGTAAATACTCATGTCCTTGCATGTTTTCTATATCCACACATATATATCTCATCAGTTGGG
>Marker440311	AAGTAGCAACAACGGTATAAAATCCCCAAGTAATAGAGTCCCAAGTGCGAAGGACTTCTGAATAGGATTATGTTTGCTCAGAGGTCTGGGTGGATTGAAAXXXXXXXXXXAAAGGATTTGAACTCGGGTCATTTCTGAGAGAATGCATTAATCTTACCAGCAGACTACATTAACTCTAATTTGTCGATTTGGTTATGAATTTGAGGTTTG
>Marker511469	AAGTTTTGAGACTTAAAATGTAATCCTCCCAAAACCATAACCCAACACTAAGAATGGTCTTTATGTCATTTGAATACAAAAACTCCACAATAAAAAACCTXXXXXXXXXXAGATCATTGAAGATAATATAAATATTTCATTCTTGACAAAGGATTATTCATTTCCTTCTTGTCATTCACTATTGATGATTATTCTATAATATATTCCCTA
>Marker448676	CCCATGTTGGGGTAGTGGATTTTGGTGAGATATTTTCTCCTATGGCTAAGTGAACATCTATTACATTCATTTTATCTACTATTGCTACTTTTGATTTAGAXXXXXXXXXXAATTGATGATTAGATGCTAATCATTGTTCTATATGTTTATTATATTTTATTTATTGGTAATGATAAGGGAATGATTAGGGAACTTAAGAGTTAGTTATTT
>Marker130678	TGAATGCCATGAATATCATTTACTCTTAGATAAAAAGAGTATGAGATAATGAATTAAAATCTATAATAGAAAAATGATCACAAGAAGGGTATATAGGCATXXXXXXXXXXCTTTTTCACAATTAAATTATAGGTAATAGTGCACCTTATTCTATGTGGATAGATGAAAAATATTTTAGAATTGAGAAAATTAAAAGAAAAATAAAATTTT
>Marker232518	TGATTGCTGCAAACCTTAAGTTCTCTGGCACCAATAATAAAGTTGTGATTATGCTAGTTTGCCACTCTAGTGTAAGCCTTTGAACTAAGTTAGGTTGTTAXXXXXXXXXXGGAAACCAAGATGATCAACCTTAGCCTTGGAAATCCAGCTCGAGCCTTCTTTCGACCTTCCTCTCCATTTCACCAAATATTCTTCATATTGCTTATTCCT
>Marker162622	AATGACTCTTGCAAAGCTTTATCAAGAATGGCTTTATGAGTAGGTGATATATGAAATAACTCTAGAATAGAAATATGGGCAAGTGTTTTTCCAATATGCTXXXXXXXXXXGTCATAATTAGATGTTGGTTGTGGTGATGTGACATTAACAAGTCCTTGATCAATGAGATTTTGAATCATGTGTTTCAGTTTCATGTAGCTAGTAGTGTTA
>Marker235825	ACCAGTAAGTAATGCTAAAAATAACCAATGCTCATTTGGTTGGTTTTAAATCAAAGCAATCTATGTAAATCAAAATAGAGGAACAATTAATAACTAAGTCXXXXXXXXXXACACAATCTCAGTCTAACCTCCTCAGTCGTATACAAAATCTAACATATATAGACAAGATCTGAGTTTCCTAATGGAATAGAACTTCTAAGCAACTAATTC
>Marker263601	TGCTTTCTAGTATAGAGTTTGAATTCTTTATAGTGTAGAATTTACATGCTTTCAAGTATAGAGTTCGAATGCTTTCTAGATAGGATATCACTACTTTTTAXXXXXXXXXXGTTAGTTCACATTGACTTGTTTGGTCCATTTCCACATATTTTCTTTAGTAGGGCCAAATATGTTTTGACCTTTGTCAATGAATTTTCTAGTATACTTGGG
>Marker287105	GACTGCCAAACAATTATTTTCTACTGCAAAAAAAATCCCAAGACCGATAAGTGGTATTGTGTGATACAAAAGGTAGATTCATCAATCAACCAAGGAATTTXXXXXXXXXXTTGGGGTAAAATTTAATAGGATTCATAGTGGTGTAATTGTGTTTTGATTTTGGTGCCTATTTTTTCTAGAAATTATAAATTTATGCACCTGTTCCTAAGT
>Marker348802	ATAGTCAATACTAGAAGAAAAAAGAAATAGATAGATGGAGAGATAAATAGATAGAGAGATAGACAAGGGGAGAGGGACAAGGAAAGATAGAGATAGAGAGXXXXXXXXXXCCTTGTTGCTTTAGGTGATGCACTTTGTCGACTTTGCTCGAAAAGTTTTCCCAAAAACAAATTGGAATGCATATATAAACAAGTCTACCTCTCAGGCATG
>Marker225204	TATACAAGGTGCTTGTTTGCTAGGGTCTCACTGTTGGATGATTTTATTGTTGTTTTACCAATTTTTTTGATTTTTTTGCTATTTTTGACTCCCTTGCATTXXXXXXXXXXTTATAACTTTAGGACATCCTTTTTTGATAAGCTTTGAGATGGTTAAAGGCATGTTGCCTTCTCTCTTCTAGTAGCTCTAGGTCTTGTAGTATGGATACTC
>Marker399872	AACACTATAAACATTTCAAGTCATCATGCTATATGCCATTTGAATCTAATCAAATCTCAATAAATTACAATAACAATTAATTTCCAATTAAGTGTTGATAXXXXXXXXXXTAGAAGATTCCTCTAGTCACAATCCTACTCATGGACAATTCTATTGTTAGGTATTGTAACCATATTGATATTGTTTTGATAATGGGTAGAAAACCATATT
>Marker360076	AACCAAATGAAGGTCTGGGCAACAACCTCTGAACAACAATAAGAAGGAAAAGCTTTTAAGAAATAGGCTATCACCCAGCCATCACCATCCAGGAATAGGCXXXXXXXXXXAGGACAGTAAGAAATAAGGAAACTCTCCACAATTTCTTTTATAAAGAACAATCTATACCTTAATAATTTTGATCCTCTTCTCTTTACGGAAAGGCTTGTT
>Marker360166	ACAAGGAATCCCAGTGCTGTTTTGAGAGTTCTGATTGGGGATTGATCTGAAGTTACTTAGCACATTGATAGCTTCAGAATTAGACCTTCAAGGACAGCAGXXXXXXXXXXCTTTACTGAGTAGTGTTGCATTCGTTCTATCATTTGTAATTATTCTTATTTATGCAAACATTTTATAACCCCTGGATGGTTTACCGCCAGTGTGGAGAAA
>Marker243574	ATAGCTCATAAAAATAATATAAGTTAAATATTTAATTTAACTTATATTTTTGAAATATAATCTCTTGGCTATTCTTTGAAGCCCAACTGCAGGTGCTAGAXXXXXXXXXXGAGCCATTCAAAGAAGGGAGGGAACTCTATTGAAGAAAAAGGTTTAGGCAACACTTCAGATGAGGACCGATGCATTCCTATGCCAACAACCACCATAGTT
>Marker410663	AACTATATCACCCTTGACCTTATGAGTTTGGTAATTATGACTTCTTATGACTTAAAGATGACAAATAATAAATGATAAGATCATGACTTTTACATTGCTTXXXXXXXXXXGACTGCAAATGTGCATTAGCACTTGGAGGAAATGAAAAACTCCTAAAACCTATGTGCAACAACACTTATTGACTCAAAAACTTAGACTAATATGTATAAT
>Marker313984	CATATACAAAAAAATCTATAAGATTTGGCTATGGAGACAACTCCACCCAAGATCTAGAGGCTTAAAGGAAAACACAAAGGAATGAGAAGATCAATACAACXXXXXXXXXXATAATGCTTCCTAAGTCAACTTAGCATGTGTGAATAAGTCTAACTAAATAAATAGTTAGATAATGTGCCTTATTTACACAAGGGGAAACTAGATAGGAAA
>Marker500811	CATTACTTGTTGAGAGCCCGATATGGGGCCAGCTAATCAGCTAATCATGTCAACTAACATATTATCATTGTTTTCCACAAATCTTCATATTTCCTCCATTXXXXXXXXXXTTTTATACTGTAACTCAAGCAATACATGCTGAAACAACTCTGTTTACAGCCATCCCTTTCATCACCACAAGGATTTTTTATATTTAGTTTATGTCAAAGT
>Marker582017	AAAAAAATCTAAGTATGAAGATCTTTGGGTCAATCTCTATATTTGGTCTAAGTTAAATCACCATTTATTTTCCAAAAATATCCTCCATTATGGTAAAATCXXXXXXXXXXACCCATAATGCGGATCAAAAGATACATTTGTAAATAATAGCTTGACCAAAGCCAAATAGTTATTTGATGACTCTACTAGGGACTCTGATCTCATCATATT
>Marker480707	ATCAAAAGGGACAAATTCACATCCACATGCATCATTCATGTATTCTGAATCATCACTATGAGAATAAATTTCAAATTTGAATGGTGGAAGAACCCCAATTXXXXXXXXXXTTGATAATAATGAACTGCAATGATTTACAATTTCACTCTCAACATGATAAACCTTCACATTTATTTTTCTACACAATGTATAAAAGGAAAATAATTCATT
>Marker495591	TCCATGGGACCAAATTGACCCTTATTACAAAATGAAATGGCTTAAGAGCCTTATGAGAAAACAAAAGAAAAGATGACCCTGCACTACAGAGAATGTGCTCXXXXXXXXXXCCTTAAATTTGCTTGTCCTCAAGAAATGCAAACCAAGATGCTAAAAAATCATTGTGCCAATGTGATAAGTCATGTTGTATTGCACATAAAGCCTAGATCC
>Marker166697	TTGAAGCTGGAGAGAAGACAAAACAATAAAAGCCACATCATTTGAGGACACAAATCATGACAAATTCAAAGAAGATCCATTAAAGAATCAAACAAGTTCGXXXXXXXXXXAATGAGCCACAATATTTCACAAACAAGATTATCTAGTCAACTAGAAAATGGAAAATCACAAAAAATATAGTTCTTGCATATAGGAAAATTAACTCATTTA
>Marker771998	CTATAATTATGGCACCGCAGCTTCTCCATATGACCAACTGATTTATTGTGCCATGGTTTATACCTGGATCATGTCCTTCCTAGTGTCCCAAATAACCATTXXXXXXXXXXTCCAAATCTCACACTAATCCAAGCATAATTTAACTATGACATGCATACACAAATTACCCAAATCGAAATCCATTCAAATAAATTTATAAATTTCCAAATG
>Marker361588	TGAATCAGGAGGATAATTCATCACATCTGCAATTGCCTCAGCTGTCTTCTTCTTTTCTATTTTTTTCTCCTTGTAGCTATCAAAGAGGGCCTTCATCTCTXXXXXXXXXXTTGGCAATTAAATTCTGCTTATGGAGATTATTTAATCCCCGAATGCTTCACGAGACCAGCTTCATTTTTTAGATTTTGGTGAGCAGCCCACCGTTTACAA
>Marker255931	TGGTTTTTGTTGTAGAATGTCTCCAGGTCTTTAGGTATGTATCCAGGAGGATTTCTTAGTCACAGTTGGGTATTCTCCTTTGCCATGTTTGATTGCACGAXXXXXXXXXXGGAGCCATTCCTTTCAGCTTCACATAATTTAAACAAATAAACATTTACCAGTGGTTTAGGGGAAGGACCATTGTTTCTGTGTATGTATACTTGCACATTT
>Marker761884	CTTTGGCTACTGATCTCTTTGGCATCTTGCTTAGCCCATTTGGGTTAATGCGCTAGTGAGAATGTAGCTATTGTCTTTAGTTTCTATTTTAGTATTCAGTXXXXXXXXXXTGATGTGAACAAATCTTTGTTTCTATAGAATATGTGAACGGGAGTGAGAGATGAATCTGTTATAGTGTTTTTTTCTCTCTAGTGGAGTGTTTATTTTTCC
>Marker440710	AGGAAAGAAAGGAACAGTAAAGTCAAAGACCAATGATTTACATTGTTACCATTGCAGAAAACCAGACCATATGGCATGGTTTTGCAAATTTGGGGCAGCTXXXXXXXXXXTGAAGGGTGTTTAGGTGAGTAAAATGGATGAACTTCACCTCTATAGTGTATAAGTGTGCTGACAATTTGATTGGATCCAACTTGATGAAGCTTTAGAGTT
>Marker239559	TGTTAGTTTGGAGTAGAATTTCTAGGTTGCCCTCAGACCGTCAACTCTTTCTTTCTTTTAGTTAGTAATAGGAAAGTTGAACTTTGAGGGCCTCTAAAAAXXXXXXXXXXTATATTTGTCTGACCAGAAGATATTCCAAGAGGTTTCATAGGCAAACCCTATAACTTAAACATGTTATATTTGCATCTAAAGAATCTATGAAGGAACTAC
>Marker484859	AGAAGATGAATTAGGCGCTCGGGTTAGTAACATGATACATTTTATGGAGACTGGTCAACTACCTAATATGCTCTCTCCTAAAAAGAGAAGATATTATAGAXXXXXXXXXXGAAGGAATGCAACCTTACCTTTAAGTCCCATATTGATAGAAGAGCCTTTTTCTTAGTGGGGTCTAGATTTTGTAGGAATGATTAATCCAATTTCAAGTTC
>Marker63779	AGTGGTCCAAACCATTAGATGAAGTTATAAATTCCCTCATGGATGCAGTTGTGGTGCAGTCACGGATAGGAAGGTCCACAAAGTGAATAGTCCAGACCGTXXXXXXXXXXCATAGGGATCTATTACATGAATTTATATCATCTCCGGGTCACAAGATTCCTCCGTGTCGACCAAGTAGATTACAAACTCCAATGAAAGAGATGTAACATG
>Marker476471	TCTGTAGCAGAATTACTTTGATGGTCCCTTACCTGGCCATTCTTATGGTGTGGTGCCTACTTCTACCTGTATCACAAGTAGTGCTGCAGCTATCCTAAAAXXXXXXXXXXAATAGACAGTTTATATTTTGCATATTTTCCTTCCAAAAAATGAGTTTTGGTTATGTTACTGTGTATGTGTCCCATCCGGGTAAACCCTGGGTATGTGCCT
>Marker121313	ATCTTCATATGCCGGCAACATGTAGACTATTATGGGCTTTGACATAATTACATGAAAGATATAGCTTTGAAGTGCCTTCCATAAATCCACTATTAAAACTXXXXXXXXXXAGGTGCTGCAAACTCTATAGGCTCATACTAAATGTTGAATGCTCTGCTCTGTGAGTTCTGATAGCGATAACTTTCTACAGACAATAGCAAACCTCATGAA
>Marker469738	TTTGTATGCATTCTCTTACTTCGCAACATAAATTTCCTTAGCTAGATTGAGATTAACAAAATATGTTTTAACTTGGTTTGAAATTCTCTTGTATTCTATGXXXXXXXXXXTGAAGCATGTGCTCATGCTCACTATCATGAATTAGATAGTCCTCCATGCTCTTCAAGGATGAATGGAACCAAAGACAAGACAAAGAACGTAAATTCCACA
>Marker427451	ACTCAAAGCAAGGTGTCACAAAACCAATGGGTAGTGGATAGGTCACAATTTCAAATGGAAGAGCTATGTGATGTGTCAAAGAATAAGTAATGGCATCTCGXXXXXXXXXXAGGGATTAAACTAGCTGGTGAAGAGAAAGGGATGAAATTAGTTGGACGACAGATAAGTGGAACACTATTGAAAAGAGAGGTAGTGAGGACACTAGAAGAA
>Marker206122	TCTTTGCATTCAGTTCAAAAAGTTAGCTTCAATCTCATCAAGGTCATCATCGTATTCCACAACATACTTCTGAGATCTTGAATTCTTTTCTGAAATGCTAXXXXXXXXXXTCTTTAGGGCTTCATACCTCACCTTTAGGTTTTGTAATTTGGCACTCTTTACATAATCATCTCCTTCATATAATTTTTTCAACTTAACCTAGATCTCATG
>Marker216795	AAAACTTTCTGAAAAGGAATGATGGTGGCAACTAAGGCTCTTTTTCAAATGCCTTAGTTTATTTTGATATTGTATATGTAATTTGAATTTTGTTTTTGATXXXXXXXXXXCCATGGATTCAATAAATTCATCCAACTTTTTGAAATTCTCATCCTTGTCAACAGCAGTAGTAGCCCCCAGAACCTGCAAGATAGAAAGATTAGATAGAAT
>Marker328830	ACAGAGCCCAAGATGAATACCCTTGTTGCTACTTTTTTCAACAAGAAATGAGGAGAAAATCCATGGATGAAGGTTTGAAGGATGCATTCCATGTTTGAGAXXXXXXXXXXTTATGGTTGATTGATATAGGTGTTCCCTACCATATGACTCCTCACAAGGAGTGTTTTTCTTAGTAGAGAGCATGTAAGGGTGGTGAGATGTTTGTTTCTT
>Marker339294	TCTTATACAAAACCAACTTTTACCATTTGAGTATTAGAATAAATTACATATTTGAAAACTAGAAACAGAATCCTACATTTCATATTTTTACATCATCTTAXXXXXXXXXXAGTTGCTTGCCTAAAAATTTAATTAAGCCAAGAGCGATTAGAGGAGGAATTGTCTAGATAGTTAGAGAAGAAAGAAGCAGAGTTGCTCCAAGAGATCGTG
>Marker321676	ATGTGATGTCAAAGTGGAAATCTTAATGTGGCCCCTGAATGAAATTATTTAATCATTTTGATAAAGGCAAAGGCAAGTTAAATGTTTTTACTTTGCAAAAXXXXXXXXXXAATCATGGAAGTTGGATTGAGAATCTTCAAAAGTCATTGTATTGTTAAAGTGACAAAGCTGGAAGTGAACTTGAGAAGTGTGGTTATTGTTAGTTATGGT
>Marker49481	GATCTTGAAGAAGGTTGGCCACAAACCAAAGATCATTGAATGATGAGTTATTAAGCTCCACAAGTCAAGGAATGCTCTGCAAGTCTTCTCCTTTAGCTAAXXXXXXXXXXAAATTGAACTGCCTGAACTGAACTAGAAAATGAAAAGAAACAAACTAAACTACAAATGAACTAAAATGCAAATATTTTTTGGTTGATGCAAGATTGTTCT
>Marker433661	ACTATACTATCATAATTTTTGACAAAGAAAAAATAGTAAACTAATAATCCCTAAGAAACCCCATAGGTTATTAAGGGTCCTAGGTATTTTTCATTCTACTXXXXXXXXXXTTCTAGCTATACTCCATGATCAAGATATAATGTATATTGCTCTCACTAAGCATAAGCTAATGGAAATGGAGGGGATGAGAGGATATTTGGATAGCATAAG
>Marker111543	AGAAATACAAAATCATATACATACATAGATACATAGGCAAAATACACATAATTGAACACAAGGCTGCTTAATCAGTAGAACGCTGAAATGGGGTAATTCGXXXXXXXXXXCCCAGTGGTGGTGACGTGCCAGAGCCAGGTTAGACATGTTCATTAAGAAAGGGAATCTTTGAAATTATGTAGTAGGAACAGAAACCAATGCTAGCTCTGA
>Marker223478	TATAATGGACTGGGCATTGTAACAAGAGGCATCATGACTCCATTAGTCTGCTGCTAAGTAGGGTATGCAAGATATGTAGGGTATGCAGGATATGTAGGGTXXXXXXXXXXAGGTGATAAGTCATGGAAGGATCTATAGGCACTTTGAACCTATCTTTAACGGCTTTCTCTAAGGCATCCCATGAACTGATTGATGCTTGAGCAAGGCTAA
>Marker189023	AAAGTAAATGGAATAGTATGCATCCACAAGATTACACAAGACTCGGATTTATGTGGGAAACCCTTTCAAGAGAAAACCCACCACCAAACAAGACGTTCATXXXXXXXXXXATGGAATACCAATAGTCATACAACTATAATCTGACCATACATGATGTCAACATACCACATAAATCACCAAGTATGACGTCTCCACATGGATAATCACCTT
>Marker534026	TTAGCACATACAAAAATTCTTGTTAGTTCTTGGTTATGTAAGTATGACAAACTATTTTGATCTCCAATTGGACTAAGACATCAACTAGAAAATAGACCAAXXXXXXXXXXTGCAATGAACTAGAACGAAAATGAAGGCAACATTACCACAAAATAGAAGACGCAAGATTTACCCTAGAGAACGTGAGTTCCGGGAGAAAACTTTAGTAAA
>Marker378243	CATCTTCTGCATTTTAACTGTGTTACCGATTTATAAGTTCCAATTTGATTGGAGATAAACACAAATAATTTAAGCTATTATGCACCAAAATGATCATATTXXXXXXXXXXATTTACAAATTCCAAGTTGATGGGACAAAACTTGAGATAAATGTAAAGTAGTAAACAAATTAATATGGAGTAAACCATGCCATTAGGCATATATGATACC
>Marker661051	TTTGCTTCTTATCCCAAGAAAAAGGTAGGAACAAAATAACTCATGCTTATAGACAAAGCCTCTTTAGACTAATTAGGTGGTCCAAGATATTAAAGGTCATXXXXXXXXXXATTATTAATAGTTCTAGTCTTCCTTGAGTGGAAATGTTTGGTATCAAAGATCTTTGAAAATCCTTTGTAAGGGTATCTATACTATTAGAGACTTAATATT
>Marker253011	TTATTCAACTCTCAAGCTTCTAGTGCCAAGATGTCAATCAAGCAAAAACTCTTTAGCTTGGAGATGAATGAACGTGAAAGTATTGTTCAACAAATTAATAXXXXXXXXXXCATTTTTGTTCTTGTGGATAGTGGAGTATGTTTAGATCCATAGGAAGTGTGTTGTATATGTGGATAGTTGAGTATGCCTCGATTCGCAGGCTTGGAGGTG
>Marker462832	ATGTTCATGTTCATAGATTATAGATAAGAGGACTATCAAAAATAGATATCCAATACCCAAGATCAATGAGCTAATAGATGAGCTTCATGGAGTAGTATACXXXXXXXXXXGAAGATCATTTGTAGCATTTGGATACAATTTGGGGAATTCTTGAACAAGAAGAACATTTTGCTAAGGAGTCCAAATGTGAATTTGAAGTTATTAAAGTAT
>Marker356193	ACTTGGAACTAAAATAAATGTTCACTTCATTGTGTTAAATGGATCCCCTAGGATCTCTACATGTTCAACATTGATGACAATCATACTGACTCTGTTTTCCXXXXXXXXXXCCAACTCAACCATTACATGTTGGTGGAACTGGAACAAACACCCTTTTTAAGCTCCCTCAAACATCCTTACATAAGTGATCTCTTATGTTCATTTGATGGG
>Marker343983	ACACAAATTCTTGCACGTGGTTGTAATAGTAGGTGACAAGAGATATTGGATTCCAAAAGTGGATTCATGCTTAACACCTACTACATCAATGTCAAAGAAGXXXXXXXXXXGGCGATTGATCTAGGAGGATTCACCAAACCAAGCACCTGTGGAAACACTTAGGCCATCCTCACGGCCTGTGGCAATTGTGGGGCTACTTCTCGGGACTAT
>Marker256059	ACACCCTCCAAGTCTCTGCTTATTACAGAAGAAAAGGAGGAGAGGAAATTGCATGGAGCTCACTGTTTATGTTTTACCAAGGTCATAACTATAAGAATACXXXXXXXXXXAGGGATGCATCCCCCACTAAAACATGCCAGTTTGGGGGACGGGAACATTCCCGGGGCTCGGAGACGCCACTCCATTCCCCTCCCCCCACTGGGCCACCAG
>Marker296718	CTTTGAAGTTATACGCCCAGCCAAAGATAAACCCACTAACAAACTGCCACGCCATTATTTTTAAATTCGCTGAAATCATTATTCTGACTCTGAGTGCTATXXXXXXXXXXGCAAAGCTATAAGAGACGAAGAGCAGCAAAGGTGGGAAACCAAAGAAAAACTAGAATTTATAATGAATGCATCACACTCGCACGGGCATCCTATGAGGTC
>Marker119016	ATGGTCTTGGGACTTTCTTTTTTTTATCACATTTTTCCTGTTTAGTGTGCATGTTATAGGCTCATTTGCTTGCTAACGGTAAAATGTGAGATATAATGTTXXXXXXXXXXCTCTATTGCATGACTCATGCAATGTGCTCATCCTCTTTTAGTGCTTGTTCAATATTTGCGTACGAAGCCCCTATGTTGTTTGAGAGCACAGAAATGATAA
>Marker437486	ATGCAATCCAGTCCCACGGGATGTTTGGCAACCTCAAGTGGCACCTTCCTCATCGTCTTGAATACTATATTTGCAATATCCTTCAACACCTTCCCCTCGTXXXXXXXXXXTCTCCTCATATCCAGAAAATGCAGAAGCATAGCTTCCTTTTCTTTGAGCCACCCAGCGCAGATCACAAGGGTCAACATGATCGAAGACTGGAATGATTTT
>Marker536096	ATCCTTGATTTTAGTAATCCACAAGACTTAATTGCAGCCTCTGCATCGGTTAGGTTCTTGTATAATACATTGGCTAGGGGGTATCTTTGAGGCTAACAAGXXXXXXXXXXTTATTTGTGCAAAAGAGACATGCAACATAACTTGTTTGATAGTTACTGACAGTGGAAAAAAAATCCTCTGGAAGTTCTATTATGTTTATCAGAAGTATGG
>Marker395668	AACCTCCTCAAAAGTTGTCCTTGAAAGATAGGAACATGAAGAACTCCTAAAGCATGTAGATGTAAAATCTACTGAAAAAGTATCAGTGTCTATTGGAATTXXXXXXXXXXATTGATCAATTGAATAAGGTAGAAGGTTTCCTCCAAGTGTCTATATGGTATGTGTTCTATCTTACCAAATTGCATGGGTAACCAGCTGCTCCATTTGTCT
>Marker413118	CCAAATGTCCAAGATGTCTAAATTGGCTTATCAGGATGCCAAATTTGTGACACTGGTTCACATGGTGGGGTCTTTATTACAAACATGAAATCACAATATAXXXXXXXXXXTTTTCCTAGCATTTCCAAAAGGCAATCTGAATTGTTCCAACTTCTGATCAATCAACTAGTATCCCTTTTCAGCAAGAATTGTGAAATCTCCAAAGCATAA
>Marker100248	AGTGGAAAGGTAACTTGCTCAAGACTCACATGTAGAGGCGAGTGAACACTCATTAACTAGGACACCTAAGTAGTCTTAACTCCATGTGGAATTATCCATGXXXXXXXXXXTAGAGTTTCAAAATGTGGATCCTAGTTGCATACACCATAGATACAATGGTATTGTAAATTTGTCAAAAATTGCATACCCTTTCAATTTCATGTTATGTTT
>Marker138966	TATCCAAGGTGCCACCAAAGTGGTTTTCACCATAGGATGGATTATTTCTCTTTACTATTTTGATGATTTTTTTAATTTATTTAATTTTTTATCATCCTTCXXXXXXXXXXCTTCAGACCTTCTCTCAGCTTCATCATAAGCCTTAATTTTGATAGAATGTTTTTTGTTAATAACCACGATAGAGTATCTCAATTGTTTAACCAATCTTAA
>Marker133075	TGTTTTTTAGAAAAATGTATGGCACTAGGGTGAGTGTGAAATCAAAACCTACAGCAAAAGACCAGATAGATCCATATGTTTCAAGTGCTTTTAATGCAAAXXXXXXXXXXGTGAATAGTAGTCTAATGAGCTTTGGCAGATGTATTTTGATGGGTCAAGGAGTAAATGGTGTTGATGGAGGGGAAATGCTTATGTCTCATAAGGGTGAGA
>Marker319440	TGGAATGCAACCTCATCTTGATTCTATTTTTATTTTTCTTCTAGACACTTTCAATGAACATTAACTCAGACTTTCTGCAATATTATTTTTTCATACAGAAXXXXXXXXXXCCTTCCAAACTTTTCAACCAGGATTAAGCATCCTTAGGGCGATAAAATTTCCCATACAAATGATGATAGATCAGTGAAACTGCATCGCCCTCCACAAGAA
>Marker82928	TGTTGAGGCCAATGAAGGCATCCATGAGTTTATTGTATTGAGCTTTCTCAAAGGAGGTTGCCCCCTTGAAGTGGCCTGCGATCAATAAATTCCTTCTATGXXXXXXXXXXAGTTTTAACGAGCTCATAGTTTAACTAAAGTTCTCAAATTAAGTGTGGGTAAAGCTGAGCTGCATTTCTATGGTGTCCTCCCACATAGCATTTTCAAGAG
>Marker409476	TTTGTAGGTTGCATCCAGAGGAGGAAGATTTTTATTTTCTTTCCACAAAGATTCAAAGACCCAAATGAAGTGCTTTTTCAGCATTCTTCATAGTTTCAGGXXXXXXXXXXCTAATTTTTAGAAGAAATCAGCAAGTAATTTTTAGCCTTTTATCTAAGATTTTTCTAACATAGGCATGTTCATAGTCATTTTTCAACTCTTTCAGTATGC
>Marker64736	ATAATAATTCATTTACAAGTTTGAATACATAAAGGAATAAGCATTGCATTGAAGGAAATAATTGACATATAAGATGTCCCACACAAGCTATGGGTTATAGXXXXXXXXXXAGAAACAACTATGGAACTTCATTGTTTTTATTCTAATCTGTTTGTTTCACGTGCAGGTATAGGATAAGTCTTGTAGCTAATTGAAAACATAACAGCATGT
>Marker293791	TGTGGATGCTTTAGGAATCACAATTGGAGAAATGTTAGTGCAACCAAGAGGAAACAAGGACCATCCAATTACGTATGCTAGATGTGCAAACTATCACAAGXXXXXXXXXXCCAAAATTGATATAGGGGAAGATCCAGGGCTAGCTAAGGAAGAGTTACACAACAGGAGTTTGTTTAGAATAAATGTGATAACAAAAGAACTTATAGAAGT
>Marker297341	TGTTTTTGTGTCAAAAAGAGTCCAAAAAATCACAAAAAAATACAAAAATCATGAAAACTTCTTTGTGTTTTTTGTGTTTTACTTGCCATAATTGAGAAAAXXXXXXXXXXCTTTTTATGCATTTATCCTCTGTTTTAACATATTTATTATTGTGCATCTGCAACAGTGAGCATTTCCACATCTTTTGGGAGAAAATTTTTAGGTTTTCTA
>Marker266681	GAAGCTTCTAAGTGGTGAAGACCATTGCAAGGCATGCTCGTTTAATAGAGCTATAGTTAATCTTATACCACACAAGTGTTTGACTAATATAATTTATGTCXXXXXXXXXXCCTTGAAGACTGTGTAACTATTTGAGATTTGTTGGAAGAGGCATATCCATGATAGCTTTCACTTTTGCAGGATCAACTTCAATACCTTTGTGAGACACAA
>Marker259317	ATAGAGCATTTCCTTTCCATATAATTTTTTTGACACACTTGCATCGTATTGGATTTCTTCAATGAGAGTTTGAGTATCCATTCCTTCTCACACTCTTCTTXXXXXXXXXXATGCAAGATAGTCATCATTTCTTTCTCATAAAATGGCTTCAAAAAATTCTTACCTTTGAGTTGGTGACTCCCAAATGCTAGGCTTTTTCTCTCTTGCATG
>Marker514723	ACAAGAACCAATGGGCAAGTAGAAGGAGTTAATAGAGAGGTGAGTAAAAAGTCAAATGCTAGAAGAAAAAGAAGAACTCAATAAATGATCAAATATAATCXXXXXXXXXXAAGAGAAATAAAGAAGGGAAAAAGTGAAGGAAACAAGAAATGAAGGAAGATGGGCATACCTAACCTATATCACAACTCATCAAACTCAAAGAAAATAGGG
>Marker337887	CTACCCTAGTGCTTATTTCTCATGCACATGCAAATAAAGTTATCACATAAAGGCTCATGCATGCCAAAATTGGTTATCACTTAAATTTTGAATTGCAATTXXXXXXXXXXTATAGACTTTTTCCAATCATAAGGTTATCCTAGTTTCTCTATGTGTTCCTTGAGGATGTAAAAAAAATTATAAACCTTGGCGAGAAGTTGTTTAATTACA
>Marker284033	TAACACTCACAAACATGCATGTAAAGTAAATATTCAAACATACAAGGATATGACAAGATGTCCATGTAAAGTAATGAACCCTATTAAATGTCATAGTGTAXXXXXXXXXXTAGCATGTGAGTATGAGTGATAGAATATGCTCATACAATTGGTTGCATTAGTAGGATATGTTGGCACCCAGTTTAACAAGTGCAAAAAAATTTCAACTCT
>Marker99611	AATAAATCTCTCACAAATGAAGAAAAGGAGAAAAAATTAGGAAAAAACCCCTCTCCAAAAGAGAGATAACACAAGATGCTCTCTATTGGTGTTTCCATTCXXXXXXXXXXTGAGTAAATTCAGAGCAAAGGAATTTGAAAGTGAATGAGGAATGATTGTTAACACAAAAACTTAAGCAGTTTTCCTCCAAATTTACACCACAAGACTAAG
>Marker388480	TGACTTTGGCACTAGCTTGCTATGTCGCTAGGGGTCATGTAAATTGAGATACCTTCATGGATTACAAGCTATGAAGCTACGTTATGATAGGTGACCATGAXXXXXXXXXXCACATCAATAGGCCAAAGCTCAAGAGACATGAATGAATGACGATGCATGTATGGATGCACATGTGAATAGGGAATATATGCCCCCATAAAATATTTTTCA
>Marker245069	TTGGGTAATTGACGAAAGTCAATACTTATTCCAATAGCATTCTTGTGCATGAGATTTGTAGTTAGATCCAATTTCATTGGTTGAGATTTGACTCGATCTTXXXXXXXXXXTGGTCCATCCACATCTACAAGTGAAGAAGTTGTGAGAAAGAAGCTTCATAGAGCAGGTAGTAGACTTGAAAATTTATCCCAGTCAAAGGCTGCACTTCTC
>Marker253291	TAAACCAATAATGTATAAATGAAACCAAAGATTGGTTACATACCTTTTCATTCTATAGTCTAGATAAACATATTCACGCCGCACTTCTTAGAATGAAAGAXXXXXXXXXXAGTATTACAATCAACCTCTCAAACTCAGAGAAGAAAACATTGCCACAAAAGGTGACCCCAAATTGGCTAAAATAGGAGATTAATGGTAGAAAAGAGTGGT
>Marker240729	ATACCTGTAGCTCACTATCTTATCTTTGAGGTATGATGTGAGTAACTTCTCAGGGCTAACCACTTACCCGTGCATCACAAAATTCATATGGCCAAAGGTTXXXXXXXXXXCAAAACTCAGGTAAGAGATTTAATGCAACTGCATGAACTATAATGACTTTATGATCACCAAGATCCCTTGAGGGTGAGGTGAGAGCATACGATGGACAAT
>Marker468896	ATCCCAAAGGATTATGGTGCCCAAATCCCATGGCACAAATTTCAATGCCTCCCATGGTCTTGGTCTTCCAGGATATTTTTGGCATATTCCTTACACATTGXXXXXXXXXXCCATGATGGCTAATATGTAGCAAAGAATGCCACTTCAAGGTGGGATACTCCACTCATGTGAGGAAAAAATAATAAATCAATACAAATTGAAAGGAAGTAA
>Marker211052	TATTATCAAATATGCGGATATGGGATTTTCCTTTGTTAAAACACATGCAGGGTGATATTCATGAATATCAAGGATATTAGGAAATATGACCCCGAGGACAXXXXXXXXXXCTAAGGCAAAATGGGGTGTGTTGTGTAACCACACAACACTACTCTGATCAGCCTTAGGAGTTTCATCATTCTTTCTCATCTTGCAACTAGTAGTCATAGG
>Marker468581	TTCAGCTTGAGAGCCAATTGCATATTATATCTTCTGCAAAGAAGAAATGGGATACAACACTTGCCCAGTTGAAGGTAATTTATAAGAATTTTCTACCTTCXXXXXXXXXXTTTAGACAAGGGGAGTCTATATGTTTTGCAGGAATAGAGGGAGACAACTAGCCCTTTTCCATTGATGTTAAAGGTGGATAAATGTGTGCATATCAGGTCA
>Marker93237	TGAACTTACACCTTTTCTTGCTCTGGGGGTGGATCATTGTCTTTATCCTGATCATGGTCACCTTGGTATCCTAGATCAATTACTACAGGGTGTGTGACCTXXXXXXXXXXAGAGGTGATTCCTTCCCTTCACTCTACATTTCTTCCCTTTGTTCATCTACCTTTTCAGTTTTAAATTGCATAATCTTAGGGATAGGAACCTTGTGTCATA
>Marker208550	ATTTACAATGAAATACAACTATTTTCAACTTCCCCAACTAAAAATTAACTCCCTTTAACAAGTTATTCAAAGTTAATGCATTATTTTTGACAATAATGATXXXXXXXXXXGCATGCTTAGCTGTTCTCTGACCTCCTCTTGATCCTCCCAGCTTGGTTTGATCTACGCCATGATTCTTGGTCTTCACTCTTCTGTTTCGTGCTTGCTTTT
>Marker386133	CATAGGCATATGAACACTAGTTTGGTAAGCCCACAATTGATAATTGAGTGTGTCAATCCTTTTGATGTTTCTTAATAGTTTTTCAAAGAATTAGTTCAATXXXXXXXXXXTATGATGATGAAAGTATGTCCCTAGGAGGAAGGAGGAGCAATCTTTCCAATAAGATCCAAGCCCCACACAGAAAATGGCCAAGGTGAAACTTGAGCACAA
>Marker267086	CATACAAATATGGAGAGAGGTAGAAGTGGAAGGTCAAGAAGGGATAACCAGCCTAATGTTAATCATTTCTTGACTACTTTTGCCCAACAACGACGACAAAXXXXXXXXXXATGTATTCAATAAGCAGTTGCGTAAGTTCTTGTTGGTTTTCTTTGATGACATCTTGATATATAGGAAGACACGAGAGGAGCATCTTCGACATCTTGATGA
>Marker356428	TTCAATTTACCCTCATCCGCCATTGCTCCCACTCAACCGTGAGACTCCCACTCAATCGTGAGACCTTCCTGCAGATGATAATTGAACACAACCTGGCTCTXXXXXXXXXXGGGGGAAATCGCACCGATAAAAGTGGAGAAAATTTAACCTCTGAGTCTAATTAGGCTCCATATAACAACACTTACATAACCAAGAAGACTATGATCATGA
>Marker247460	TGCTTTTTAGTCAAAAAGAGTCCAAATATTACAAAAAATAAAAAATCATGAAAAATTCTTTGTGTTTTCTATGTCTTACTTGCCATAATTGAGAAATTAGXXXXXXXXXXACTTGTTGCGCATATATCCTCTATTTTAGCACATTTGTAGTTGCACATCCAAGACAATGAGCTTTCCTGGTATTTTGAGAGAACATCTTCAACCTTTCTA
>Marker356559	TCCAACTAGACTCTTTAACCTCCTCCATTAAAATAAGACATTCATTTGATTCTTTGGAATAGACAAGGATTTTAAAACCTTATCCTAAACTAGTTTACCAXXXXXXXXXXTCTCAGCCATAACTCAACTATGCATATTTTAATATTTTCAAGTAAGGAAATTCACAAGAATTCGCATATTACTTCACATTTAACCAGATAACTCATGTTT
>Marker265678	AGCCTTGGAACCCTCTGCTGAGAGAGTTCTATATAGTAGAAGTTTTATTCTTAGAGAGATTAAGTCTTCTTCCATAATGTTGTAGCCAGAAGAGGATGGGXXXXXXXXXXGAATTATGAAGGAGGTGATGGATATGGGATTTTATGAGTCTGAGAGAGTAGCTATGGATGAGGAGATGTCCGCATTGAAGAAGAATGACACATGGGACTT
>Marker237852	ATTGCAAGAACAATGTAATAAGGGGGGAATGTTAGCATTGATTACTACATTGTTCTGTCGGCGGTTGGTTCAGTTCGTTGTAAGTTAGAGTTGGTTACTAXXXXXXXXXXTTTTTAATTGAACCTCAAAAGATTCGGCATTAGCTTTCCATAACTCAAACGTTTCATCTCCCTTTCCTTTTAGACAATGATCTGGTCCCTGTTTGGGTGG
>Marker162317	AGCCACTATGTGGCACTTGTTATTATATAAAAAGTAATCAAACTAATATAAATTTAAAACAAATAAAAAATATAAGGTATGCTTTTTTTCACCATTACACXXXXXXXXXXCAAAGACATGAATCACTCTTAAAGGAAAATCCTAAAAGAGGACCACACTCTTATTAGCCCGAAAAAATTTATTATGTCAAGGGCTTGATTTGTATAAATG
>Marker639344	TTAGAATTTTATCAAACAATGAATGACTCAAGGACTTTTACATGACTTCAACATACTCAAGGGTCATCATATGACCTTATTACATAGATATTGGTCTATAXXXXXXXXXXATATTCTTGTATTGAAAATATTTACAAAATCTACACATTCACCATTAGAACTAGCAACAAAGAGGAGTGTTGTATCTACTTCTAGTGGTCATGTTTTCTA
>Marker395901	CATCTTTCAATGGTTATTGTAATTCATGAAATAAGTTTGGTCATAAGGCTACTCAATGTAGAAGCAGAGTGAATCAAAATATTCCATCTTTTTCTAGTTAXXXXXXXXXXTAGAATTGGACATAAGGCTAATCAATGCAGATCCAGAATGAATGGAAGGAACAATGGATAGAGGAATGTTGTATGTTTCCATTGCAATAGGCTTGGACAT
>Marker151547	AGCTACACCTCACACCAAAATCATACCTTCTTTTCCCATCTTAATGATACTATTGACAAGGCAAGCACCACCGCAAGTCAGAAATCATATACCACCCCGTXXXXXXXXXXTCCTTGACCTTACAAAAGATGCTTCCAATAACATGTCAAATCCTACAACCCCTTGAGCTTATCGAAGAACCTCCTACCATAAACCCAAGTCAAGAGCTAT
>Marker407723	CTGTGCCATGGAGAAGTTCACTCCTTTTCATGAGGGCACAAACCAGTTCCACCTAAATCGGTGTATCAAAAGACCTGTCAATAGTTACAGGCTTCATTTTXXXXXXXXXXGCACTTGTAGCGAGGGATTTTTCCTATGACCTGTTGTCATACATATCCAATTTTCTAAGTTGTGATATAAAGACGTATTCCTCCTCCAAAATCAATGTGT
>Marker282756	GACTATGTCAAACAGAAGCTTCGGCCTGTCTTTACACTGAACATTCACTACAGAATAACCCCTTTCGAAGCAGTTGTCCAACGTTACACAAGACTTAGGCXXXXXXXXXXGTCAGCCAGAACAGCAAATATTTCAGAGAGTAAACCAGGGCGGTCTGTTCCTGTTAATTCAATAGCTGTGTGTTCAGCTGCCGCTTCCATGCCGAAGGAA
>Marker447788	TCCCTATAGTTCCATCAGCTGATTGCTTGTTCTTGTATGGCCACTTAGAATGAATCATTGGTCTCACCACAGGTCAAGTCACCTCCTCCCAAACATTGTTXXXXXXXXXXTAGAACTAGATTCTGGTCTTGATTGACGAGCACTTTTGGTTGGATAAAAAAACAGACCAGCAGGAGTATCAGTCTCTTCAATCATTGGAGAGGCCTCCGA
>Marker387806	TCAAAACTGAGTGTAGCAACAAGGTGAGATACCAATCAAAGTGTGCAAGAGCAGATTGAGTGGATCGTAAAAATGTTAGTCACAAGAAATGCCACAATATXXXXXXXXXXCCACATAGAAGGATGTCCCTAGGTCATCAACCACAATGTTATGACCCTAAGGCATGACACACAACAATAAAATAAAGGAGAGGAACAATAGAAGAATGAT
>Marker486247	ATATTTATCACCCACTCAAACAATTTATTATGGTTGTTTTCAAGCAGTAATGGACAATTTCAAGATTTTGCAGTTTGGCACCATTCAGGTCAGGCATTTTXXXXXXXXXXTCATGCCTTTAGAGCTTTGTAGGCTGTTATTTTCTCCCTTTTCTTTCATTCTAGTAGCCTTCATGTCTCCTAAGATGCTCTAATCTTCACGAGCAATGAT
>Marker208290	TCATTTAATTAGCCGATAGACTTTTTACTTTTTATAAGTGGGCTTGCCTGTAAACCTGTCTTACATTGGGAAACTGAGAAACACCACCCATAAACGGGAAXXXXXXXXXXTAAATGCAGTTTGCTCACAGCTGACAGGCCTTCTTGCCAGGTTGTGTGTATAATAAATACATTTGAATACAATGGCTATTGCACTAAAGAATATATAGCA
>Marker414148	AGGGTTGAATTTGCCATCCATTCAGTTATTAGAGAGGTGTTACTTCAAGACTTCCTATGAATCCTCTTGTTTTTCAAGGTCACATTCATTTTTCTCTCTTXXXXXXXXXXTGGGAGGTGTTCAACGCATTGAGATTTCTCCACCACCACACTCTAAACCAAGCTCAAATCGACTTAACTATTTATGTGTTTTGGTAGGATATTAAAACTT
>Marker432693	AATCATGAAGGCTAAATAGCCATCACAAAAGAGAGATAATTTATTACAAAGAGGTAGACACAAGATAACCATCTATATTCATTGGTGAACCACTATCAGAXXXXXXXXXXCCCATGAATGCTACAATAACTTCACTTATGTGTCCTCAGAACACACCCACATGGCTCTACCCTAGAAACCTACTAAAACATATCATCTTCCCATGCCTTG
>Marker280272	TGATTGAATTTCCCTTCGGCTCATAAGAAATGATATCTATGGGTAATTATTGGAAAGTTTTGATGTCAATTATTCGAGCATGATAATACTAATGTTGTTCXXXXXXXXXXTTTAGATTATGTTCTGTATTTTATTACCTGTTTCTCTCGTATCTGTTATTGTGTTAAAAGTTGTGCGGGAAGATAAATGCATTTAGAAGGGAAGTTTAGG
>Marker477771	CAATTTCTGCTGGAGTGAAGGTTGAAGGACAGAGGAAGTGAGTGTATTTGTAATCTCCTTTTGTGAAGATAATACAACTTGACCTCTTTTTGAAAGAAAGXXXXXXXXXXGAAGTATATCCAACCAAAGATCCAAAAGGTAATTTGACATCTATGAGATTCTTACATACAACCTCCATCTCAAGTTCCTGATATATAGGAGATACAATAC
>Marker239737	TCATATTCTCCACATCTAGTGTTGATGATCTTGACCTTGGTGGACTTGAGATTTTGAGAAGGAGACAAGGTGGAAGCAAGGGTGTTGGGATCAACATATGXXXXXXXXXXAGAACAACTCATAGCGACAAACATATAATACCCTTTGATTCTCTTGCTGCATTGTCATAAGCCTTTTTTGTAATTATGTGTGGCTCAAGGTCATTTCCAG
>Marker475200	TTGTTCAAGTAGTGTTGTTGGGGTCACTCATGTAGATTTATGTCTCTTTGATCTTGATCTTCATCCTGATTTTAGTGAAGGACTTCAATTTCATCAATATXXXXXXXXXXGACTTTTTCATGTTTTCTCTACACATTTTCTCTTTTGGGGAGGAGTTTTTTCCTAGGATTTTTCTCATTTTCTCCATTGATGATAGATTTTTTTTACATG
>Marker484234	TGGGTTTTGTTGTTTCCAAAAGTGGGCTAAAAATGGATCCAAAAAAAGTGAGGGTGATTGTGGATTGGCCTTTGCCAAAGAACGTGTTTGAACAAAGAAGXXXXXXXXXXGAGTCTTGAGTCAAGAAAGTAGACCAATAGCATATTTTAGTGAGAAGTTAAATGAGGTGAAAATAAAATGATTCATGCATGACCAAGAGTTTTATGCCAT
>Marker386149	TTAGTAGGTTGAATTGTGATAGTTATGTATATGAATAAATTTCCTACGGTATATGGTTATGTTTAACTTGTGCTAAATTACTCCATCTATCTTTCAGATGXXXXXXXXXXCTTTACCCTGCAAACTCAGATTTACACTTGAGGAATTTTTAAAAAGTGGATAAAAGGTTATTTTTATTTATTTTATAGAATAAAATACCCCCCTTGGACA
>Marker184788	AGAAAGCACCTTGTGGAGATGACATGAGGGTAGTTGGAATTCTCTCCCACGTCCTCTAGAATCTAAAGTTAAAGTTTGCCAGCATCTCACTTGGAGCCCTXXXXXXXXXXTCACAGAACCATCGCCCGTGAAGGGTGAAAGACTTTTCAGGGATGCAATAGGTATGTCATTGTATGCAACCAAATCTAATGGACTTCCTCCATTAAAGGT
>Marker266728	ATTTCTACTAGTATGAAGTAGACTCTTCAAAATATCACATTTTTAATACGAAGAAAAAAATTATTACAATATGTGAGCATGGGCTTTGAATTAAAGCTCAXXXXXXXXXXGCTATAGTAAAATAGAACAAAGAATGTAATTGTTATTTCTAACTTAGTCAACGTAAGACATAAGAAGAGAATTTATTTTGGGTTATTTAGGATAAGTGAT
>Marker187075	TCCAAACGCATCAGCTCACGGAGAAAAGTGATGTTTACAGTTTTGGTGTAGTCCTGGTTGAGCTTTTAACAGCTCTGAAACCCATCTCTGAAGAAAGAGAXXXXXXXXXXAAAGGCAAATTTCCATGACACTGTAAAGTGTGAGCAGACAAACATTTCCAGAGAAGCATTACAAAGTTTCAGGAGTTACACTTTTCCATCTGCAGTTGTG
>Marker171723	CTCGTGTAGAGGTCATACGGCCTCTCCAAACAAAAAAAATTGTCTCTCGCTATAACTTTGTCCAAATTGAACAAATTTTATATGGATCTATAGGTTCTCGXXXXXXXXXXTCAAATTCTAAACTACGTTCAAACTTCCAATTGAGCAAACAAGTGGATTTGCTCATGATTATGAATATGAATGTTCAAACGATCATGCAAGATCTTTACA
>Marker425652	AAGGTTATTGGTGCCAGCACTAGGAGACTGTTCAGAACAAAGCCGATGAACAGATTCATTCCAGTGAATTTGGCTCAGAGAGTGGTCTGAGGTGTGACTAXXXXXXXXXXTGTCTATCCTCCATCCAGACGACCACGACAATAAATACAAGAAAGGTGAAATGACTCTCAAGGCATTGCATGATGGGCACAGCATCTTCTTCCTACTGCA
>Marker506546	CCAATTTCTAACATTTAAAAAGGAGTCTCGAATCAATCCAAATCCAATTGAATGGGTATACTCCTAATCTTGGGTGAGATCAAAAATGTTAGAAATGAAAXXXXXXXXXXAGGCAACACCAAAGAATGAAAAAGGATACTAGATAAGCACATTTTGAGCCATTTAAAAATGAAACTTGATGAGTGCCTAATAAATGAACATGATGGGGAA
>Marker78769	CCACAATCACCCTAGATCATACACATCTACGACTACATCATGATTTATGTCCTCAGCCTCTGAATCACTGATGTCAACCTCTGCAATCATAGGATGAGGCXXXXXXXXXXTCTATCAAATCTCTGTCTCCAATAAAAAAGGTTCCAAAACTACCATGGCCTCACCAAACCATAGGCATGGGCTCAGGGATCCATCCAAGTAGTGGCAGTA
>Marker80597	TAGTCGTGCCTTGAAATAGGAGTTGAGGACACGAGCACTCGCGCCCTTGTCCTGCCATATTTCAGGCAGGTCCCAAATTTGAATTTCAGTTATGTGACTAXXXXXXXXXXAACATATGAGCAGAAACAAAATGAACACACTTGACACCAAGATTATTAACATGGAAACCTGATTAAGGGAAAACCATGGTGGGGGTTAACCCACAAGATT
>Marker517429	TATTATTATTATTATTGTCTAGTTGCTCTATTGAGTTGGTTACTTGGTTGAATAAGGTAGTCATACTATGCTTGTTGTTGCAAAACCTGACACTCAAATTXXXXXXXXXXACCTCATTCCTTAAAAGTATTAGATCTAATATTTTTCTATGGAGTGCTTTGTGGGTGGTAATTGTTTTCTACTTTTCTTTTGTTTGTTCTTCTATTTTAT
>Marker296008	AACAAGAAGCAAAGTTGCTGAAGAACATGTAAATCTATGTTTAATTTCTAAAGTAGAACCTAAAATAGTAGTTGGGGCATGCAAGGATGAGCTTTGGAACXXXXXXXXXXGTTAGAAAATGAATCTGTCACTAGTCTGAAGGTTGAAGTTGAAGAAAAGGTAAGAACTAAGGAATGTCTGAACTCAATGATGAAAGGAAAATTTGAAGAA
>Marker401232	TATTCTTGATGGTATTTTTGTTTAAATCTTTGTAGCCTATGCATATCCTCATAGTTCTATCCTTCTTCTTAACCAAGACTACAAATGAAGCAAAAGGGCTXXXXXXXXXXTACTAAAGATTGGGTTGCGCAAGAAACTTATCCTTAGTGAAATATTCTCTCTATTCTTTTTATAGAAACAATTATAGAATCTCCATTTTTCATTCCACAG
>Marker228528	TGTTCCTTTGTCATGTCGCTTTTCAATGTCTTAAATCACCTATTGTAATATGCACACATACAAGAAGGGGGAAAAATGTTTGTGGCTATATTGGAGATTGXXXXXXXXXXGAAATAAGTTTCAAATCTTTAGCTTCACGTTAATGAAGTAGAGAGTGACCAAAGCTTGGAGGTGAGAACAAGTCAGAACCATACAAAATTGTGATGAAGA
>Marker424285	AAAAAATGAACAATGAACTCCTTCACTAAATTGAAAATGTTTAGGGCAACATACCTTCCTATTCAAGCCTCTAGATTAATAACATGGCTTCTATTTAGCAXXXXXXXXXXTGTTTTACAACTGACAAGATTACAGAAGGGCAACACATTTTTATTTTATTACAATAAACAACAAAATTTATGTAACTTTAAGGGGTTTTAATTAATGACA
>Marker297384	TCCAGGTTTGCATATAGTTTCTTCTTCATCTACAACATCAACGCTGGTTTGGACAACCTTACCTGAGTTACTTGATGCTTCATTGTTTTCTATCATCTAGXXXXXXXXXXTGCCCTAGCAATCTAGCAACCCTCTAAAGGTATTTTTAAATACCAGCAATCCAAATAGCAAAGCAAACAGCAACAAACCCAACTAATCAAGAAACACACG
>Marker204328	AAATCAAATGTAGACTTGTTCTTGCCATATTTAAAGAAACAAAGGTTATTAGTGTTGAAGTTGAAGAGCCTAGAAACATCAAAATAGAAGATGAAATTGTXXXXXXXXXXTAAAGGAGCCAAGGGGTTCTTATGAAGATCATCATAGGGAAAAATCTTGAAGGGGGATGATGATCTAGAAAAGGTAGATGAACATCACCACTTGGCTAGG
>Marker484951	ATCTATGTATTCATCAATGTTTATATTTTTTGTTTGGAATCAAGTTTTCATAATAATCTTCATTGTCTCTTTATTTGGAAAATCTACTTGCAAGAGTCTTXXXXXXXXXXACGAATTGATAAAAGAAATGTTTGATCATGACCAAGATATGTCTCGGGAGGGTTTGGGGCTGCACATCTCTCACAAACTCGTTAAAATAATGAATGGAGA
>Marker370321	CTTGAGGAACAAAGAATTGTCTTGCAATCAGATGATGAATTATTACTATTGTGAGTTTATTGTTGGTTTTTAAAGTTTCTCTTCGTTTCAAGAATATAAAXXXXXXXXXXGTCACCACTATAGGCAAACAAATTTGAGTTAACAAAAATTGAGATAGGTATTTATAGATGGACCTGACATCCACCTATAGGTGCAAATGAGACATTCCTA
>Marker382659	CACAAAACTAAATAGCCTACACAAATGTGAACCCCAATCCACATAACTAAACCATGAAAATGATAGGTGGGCATGGAACTAATAGGCAAACATGATACCAXXXXXXXXXXACCTTGGTTTGTTGTTATGTCTCGTAGTATATTTGATGATTGCCACGTATTTGCATCATGGAGGTAAGTTCCTTTCTTTGATGGTGTGTGTATGCTAAGT
>Marker385865	CGAGAGCGAGTAATACAACACTGTTCCATTCACGTTTATGTATAAACAATTAACTATGTTGAACAAGGTATCTGATATTAATCAACAACATAAAACATTCXXXXXXXXXXAGAGATAAAAAGTGCCTACTTAGCACTTTTCCCTTTCATTTAGCATCTACTCATAGCCTCTTTATTTAATAAAAATGACAATGATCTTTTGATTATTTGT
>Marker136145	AATAGGATTCAAAACTAGCAGGTCATATTCTAAAATATACAAAATGTAAAGGCTATTCGGCCTTATACACACACAATAATAAACAAAGCCTATCAGCCTTXXXXXXXXXXATGTCCCTCACAGAAAAGCATATTGCAATACTCATTGTGTCTGTTTTCAGGTCTTGTGAGAATCTCTCGTAAGTTAGACTTCCTTCTCACATATGCTCGA
>Marker256712	AATCTTTGTTCTTGAATTGACTAGATTTTGTCACTAATGTTTGCATGATTTTGTGAAAAGATATGTGTGTTGATACAGGTTTTTGAGTATGGCTTAGTGGXXXXXXXXXXAGATTTTGGGAGTGATATAGATTATCTTTTTATTATTCAAATAGTCATGCTACGAATGAATAGAATTAGATTTTGCTCTGCGTAAAAATAAGTGTTATTG
>Marker141256	CCAAGAGACTGAAGAAGGAGAAGTGTCAAGAGTTGGGCTCAAAGAGCTCTCTTCAAAGTGAACTCTCCTCTTGATGAACAACTCATGAGTAACTGGATGAXXXXXXXXXXCTAGAGTAGATCATGCAATTCACTATTTCGTTCAAGGATCTATTTTTACATTTTGCTAAGGATTGTATAAAACTATATGCTACAAGTTAATCCTCTCTGA
>Marker248128	TAAATAGTAGTTCAACCCTTTTTGTTTATCGGATGACCGGACATTGTGAATAATGTTTGCTTCTGGCTATGGCCACACATATACTCTTTTACTATTACGAXXXXXXXXXXTGACCATCTCACTCTCTTTATGCTGTTGTAGATATGTTTTGTCTCGCCATTGAGGGCCTTCCAATTCTCCTTAGTGCATTTTGTATTGACAAATGCGCAT
>Marker378767	AGGAAAGTAAACCAGGTGCATCCACTTATTCAGCGGGGGAACCTAACTATGCATGAAAAGTAAATCCAGGTGCATCCACTTATTTAGTGGGAACCTGGGCXXXXXXXXXXTAATACAAATCAAACAGAAGTAACATAATGCATTCAACTGTTATACCATAGAAGGTGACTGCTATTATGTTGCTGCAATCAGAAAGGCTCCATTTTCTGC
>Marker348148	CGAGCTATCAAAGAATAATGTCCAGATTCAGGGTATATCTACTGTGAATATTGATTCATCAAGGAAAATGATGACCATAGGATGGTCTGTTGGTGTAGGTXXXXXXXXXXTATCCCACTAATGTTCTACTAATATAATAGATTTCCCTTTCTTTTCCTTCCTCATCATTTTGTGCTAATAATGCCCCCAATGCTAAATTGGTTGTTGATA
>Marker197482	ACAGGTTATGTCTTTACTATAGGTGGGACAACAGTGTGTTAGATCTCTAGGTTGCAAAAGGTGGTTGCTTTATCCACCACGAAGATAGAGTATGTAGCTGXXXXXXXXXXGTTATTTTTCTATTGGCCGACATAAAAAAGACCCTATTTTGTAACCAACATAAGTCTTGATAAAAATAGCTAAGGGTTAGGGTATCTGTTGATATTGTAT
>Marker336034	CCTAGGCCCCATTTGACATGGGTTTCAAGGGATTTTGGTCTAGGATTTATTTTTAACATGGGTGATCAAAATCTAAGGGACCTAGGACCTAAACTTCGGAXXXXXXXXXXCAAGGTCCTTAGACCCTTTTCTCCTATGTGGCCTAATCTCTAGTGCCATAATATAGTCTTCTCTGTAGGCAATTTTGATTTGGAAGAAAGATCCCCCTTA
>Marker265068	ATCATATACTAAGGGCATGATACTGGTGCACCCTAACTTTCAAGATTGACATAGGATTTACATTATTTATTATTTGAGAAGGCATTTCTTCATTTCACTCXXXXXXXXXXGGAGGATGAGGAGAGGTGGAGGCATCTATTTTACAAGTTGTTTTGAAGGCTAACTGATGGTGGATCAGGAGGATCCCCAATAGTAGTCCAATATTTTATA
>Marker363077	TGTCAGGATTATTCCACATTACATCTTCTTATCCTGGAGGTTTATGATAATATTTCAGTCTAGCTCCATTTACATACCCAATTGTTAATTTTCCTTCCATXXXXXXXXXXTGGTAGTATGAAATGTATCGATATTGTGGCATCCATGCCATATATTAATTCATATGGTGTGAAGTTTGTAGTCCTTTTATATGTTGTGCGGTAGGCTTAA
>Marker301278	CTCAATTTTATTACTATGCACCTTTGCTAGCAAACAAGAATTAAATTAAAAAAATGCTTAGTGTGTTCCTTTAGGTGAAGTCCTGTGTCTTTCTAAGAAGXXXXXXXXXXCATAAATTATCACAACTATCCAATATAAGTGTGTTATTTATAAAATAAGGTGCTCATCTAAACAAGTATTGTTGTTATGTGGACAAATACTATTCTTATA
>Marker329210	TCCTGCATCATTCCACTCACCATATCAGTCTCTTGCACTAAAAATTGACCTATGATTGCTCCACATTACCTATCTTTACTAAAAACAACCCACTTTTCTAXXXXXXXXXXATATTACCATAAGCGACTACTTTTCCTATACATGTGACTTGAACTTCTTATCCTAAAACTACTCGCTTCTAGTGACATGTGTGCATTTAGCAAAAGTTTT
>Marker397308	TTCTTTCAGCTGCTCCCACTTAATGTGGACAGTAGGTGTGTTGCTTTCACTGTGGATTTTAAGGAGTCCATTTTCTTCTTTTCATTTGCACCAGCTTGCTXXXXXXXXXXCTGGATAGAAACAAGAAATGGATTGGATTGTTTTTCTCTGTTAGAATCCATTAACACACTTGTTTTATTTTTTTATTGAGACTGAAGCTTTTTTTCATTG
>Marker594309	TTGTCCAACTCAATTCATGATCACATTCAAATTTCAATTCATTCACATTACCAACTACTATCACACCGACCAAACACCAAAGTCATTGTGCATTGTCGTCXXXXXXXXXXCATTTTCTTCAACTCTGCAATGTAGAAAACAACATTCATTTGCTAAAACTGTGTTAAAAGATGTCCAACTCAAATCATAAGTCTACTTATCCAATAGTTA
>Marker259685	CTTTCACTTTTTTATCAAGTGTAGCTAACTCAAAATTTCTATTTAGGGTTTACTTTTCTAGAATATTTTATGTGTTTTGACTACATTTTTTGTGTTGTATXXXXXXXXXXTGTGTATATTGCTTAGTTTTAGGTTAGAATTTTTTGGATTAATCTAAATACTTTAATTTGAGCTCTTTTAACAACATGCTTTAAGAAAAACTACCTATTT
>Marker330951	TTTTCCTTTGATTTGAACACAAAAATCATTTCCAAACTTGACTAATCCACCTGTATAATCTTCAAAATTGATGAACATGCTCTTATCCCCAGTCATGTGGXXXXXXXXXXCTTCTTACAAAACTTGATCTCCTTCTAGATACAATCCTACATTCACTAGCCTTATGTCCATATTGGTTACAATAAAAGAAATAACCAAAGAAAAGTAGAT
>Marker304560	AACTGAATTACTATCACCATCTGAATGTGTTGTCAATAGTTAATCAATTTGGCTAAGTTAATCTTACCGGACCAAACATTGTATACATCTTTATCTCAGTXXXXXXXXXXTAGTGCATATTTTAGGAAATCTACTAGCATTATAAATACTACTCTAAAGTCTGAGGAAGAATTTGAAGAACTACCACAATCACTCGATCTCCTAAACCAC
>Marker720826	CCCTCCTCCTAAGTTATCCACTAAGATGCTTAAAGCATATGACTTTATTTACCAGCTTCAAAATTCTTAAAGCTAAAATATTCATATGGGACTTAATGCAXXXXXXXXXXTTTGGCATGTTTTTTGCATAAAATCAAAATTGATGCATCTAAGTTACAAAAACTTAACATTACAATCAAAGGGTTTGATAATGTAGGATGAGAATCTACA
>Marker605020	TTCACACAACATCGATGAATAAAGGATAATATTCTTCATGCATTTGTCATGTCTTTGCTTTGCTTCAACCATGGCATTATATAACAGCATTTCCACAACTXXXXXXXXXXCTTCAAGGCATTCAAGCTTCTTGAAAATGTATGAAAGAAGGAAAAACACCTGCTTTTGGGCTGGCATTAAAAATGATATCAAAAAACTTGTGGTGGAATG
>Marker326597	CATCTTTTGTGTCAGCCAACTAAACTGTGATATGGAATGTTCAATTCTTATTTCATATTTACATTCTATACCTTCAAAATGAAATTTGGACCTGGGGTAGXXXXXXXXXXGATGATGAATCACACATGGATACAAATCTGTGGATATTGTAAGCGAGCTTAAAGATACAATCAAGCCTGAGGGGCTGGGTAGCAAACTCTACTTGGACGA
>Marker149472	TATATGTTATTATCTATGAACAATATCCTTTCGACATATTTTAAAAAAATTACATAAATTTATATTGAATGAGTAAAACATAATACATTATTACTAATTGXXXXXXXXXXCAGTTTGGGGTATGGAGCCAATATCACCTATACACAAGCTCAAGCTTGTAAACATTACCTATGGTAGGCAAATACAAGAAGTTAATTTCTCATTCTAGAT
>Marker369136	TAAAGCCAAACCTTGGCTCATGAAAGATGGTCATGCACTTAAAATTGCCAGCAGTCGTGGTGTGGCACTGATTTATTTTTTCAGTTTGCCAATTCTCATTXXXXXXXXXXACATTTTAAATATCTAATTTGATGTGGTTGAGAATAGCTATTTTATCTTGACGGAATTTGTGTATTATCTTTAAGATATATAAATTGTAATAATTTACTA
>Marker234746	TATCCCTTCCCCAAGCATCTATGTCCTAGCTCCCACGGCTCTCTATAATAAAAGCACAACTTCTTCCTCTAAAGCTCATTCTTAGTTTCTTCCATCTTGCXXXXXXXXXXTCCTATCAAACCTATCTATGAGCCTCTATGTGAAATCAACATATGTCACACCATGATGATGCCCTTGTGTGATTAACCCATGATGCCACCGCTCATGTGT
>Marker162318	GGAAGGGATCCTATTCCTATAACTTATCCTCTGTTTATAACAAGCGCTTCTCTATTTTTATAATAAAGTTTATAATGTGATAAAAGCTCACACTATGAGCXXXXXXXXXXGAAAGATGAGATACACCTCAATGAAAAGGGTCACTTCCAAGGATTTCTGCTAGGAAAAAATTACAAATTTTTTTACAGATGTTGTAGTTGTAAATACCCT
>Marker233876	TACACCTCATAAGAAGGTATGATTTGTCGTGTGATTTCCAATAGAAATACTGTGTCTGTAGAGCATCACGGAAACATAAAAGGGTTCCCTTTAGATCCCTXXXXXXXXXXACATGCATACACCACATAGGATGTCATGTAGAACATCTGATATCTCTTCTTCCATGATATCATTCCATCATGAGGTTTTTCACTAATGAGCTTGGCCTAA
>Marker295982	CAACCATGTTTCCTCTATGTGATTAGGAGTGTCAAACTGAAAACAATTAGCCCACTCATCTAGCAGTATATTAGGTATTTCATCCACAGGTGTGGTGGTTXXXXXXXXXXCAGGGAGATCTATAACAAATATATCTTGTGAAACATAGTAGCCAGGGCATGCATGTAAGGTGAGCTCTAAACCTTTAATAAGACATCCTGTCTTGACAAT
>Marker752066	GAATTTAATAAGTGATTATGAATGACAGTAGCGTTCAGTTTAATGTTTCAACTTCATTTGCCGCTATTGTTTCTCCTAAAATGCTTGAGTATTGCTTTTCXXXXXXXXXXTAATGTTTCCTTCGTCTTTTTCCACTGCAAATCCAAACAAGGAAAACACCCAAATTAATCTTCTGCTGAAATGCATTGAAATCAAAAGGACATATAGCAG
>Marker153318	TAATTGTAATGGATAATAATGAAGTTATGAGAATGATATGGACCTATATATGCCTAACACACTTGTTTTGCAAGGTGAAGACAAGGGAAATGATGAAAGCXXXXXXXXXXAGCAGCTAGTGTTCTGAAATGGACTTTGACACTACAAGCAATGGTTTGAGCTTATCTCCACTACACATAATGACACCTTGCTGGTTATATGTATGGAGCT
>Marker351776	TGTGGAAGATGGAAAGTATACGGATCAGTAATATGAGTGTATGCAAAGATTCTACATATCTCAGTGTCTCTAGGTTGAAGCACATGCAAATCTCTCTTGTXXXXXXXXXXTAGAATGCCTTGTTTTCATCATTTCAACATGTTTCGTCTTTTGCGGATGCATATAATGATCATATATTTCAAGTGAATGGTGTAAGGATAGTGATGATAA
>Marker275998	TCCAGAATGCACAACCACAATCTAAGAGTGACAAGTTGCATAACTTGAATACACAAAAGGGGCTAGGATCATAAGAAAGGAGCCTTCCATCTGTTGTTGCXXXXXXXXXXGGTATATTTGCATACTCAGGCATATACCTTGTATCTCCCATTAATGTGTCCCTTGGCTCCTCAAATTTCATATGGTCAATTTTGGCCAAGGTATTGTGAA
>Marker98428	ATTGAATGAGAATTATATATAAAGGAGATATAAGGGTTATGATATAATTGTATGTGTATTATGAATGATTTACTCTACTTAGATTGTATTGTATAACAAAXXXXXXXXXXCTTTCTATACCATTTTAAAGTATCATTCTGCAATGTCCCAATAAAGTCAAATAATTTAGTATTGTCCTTGGTTATCTCATTCCAGCTCCAAATTGATTCT
>Marker596110	CATTATTCCTTGCATTCTAATATCATTTGATCTTTACTAAATTCCTATAATGGTTTCATGACCATCCCCATTTGCCTTCTTAAAAATGAAAAAAAAATGCXXXXXXXXXXAGTATCTGAAGGAGAACACGAAGAAGAAAATGTGAAGATTTGATTGGGCTAAAGGATTGACCAATAATCACTAGTGCAATAATGAGGTAATCCAGAGCCC
>Marker217432	ACACATATTGACAAAGTGAGATGATAGGAAGACTACGAAGAACAAGAGGAATAAATTTTATTTAGAAAGTTTCTCCAAGAATGGTCAGGAAATGATCGTTXXXXXXXXXXCTAGGTTTTTTGTCACCAAAAATTCACTTGCACAAGATGCAACAACATACTCATACTGGCATGGACACACACATGCAAGAGGAATGCCAAGTAGACTAGG
>Marker159939	AGGATTGAAACTAGGTAACAAGTCTGTTCAGGAGTATATAGAAGATTTTTATAAGATTATTATCAGAATTGGCCATGGAGAGGCCAACAAGGAGAGGGTAXXXXXXXXXXTGAGAAAAGAGGAACATGATGAGGAAGACTTGGACAAGGACTGGAAGAGGAGGCTTCAACCTATTTCCAATGTGGAGAAGAAGGACTTCAAGCCTATGAG
>Marker732598	ATGAATAGTTGAGTGAGTCTCGATTCACAGTCAAGGTTGGTGATTTGCTTGTGAATAGTTGAGTGTGTCTCAATTCGCAAGTATTTTGGAGGTTTGACAAXXXXXXXXXXAAATGTTAGTAAGTAGATAAATAAGTTAGTTCTTGAGAAGTTACATTCCCGTAAATAAGTTAAGGTTGGTTCATGGGAATATGTGGCTTTATAAAGCCAT
>Marker363225	ATGCTATGACATAAGTAAGAGAATGTCTTGTCATGTAAGATGTGTAAGGGCATCTATGATGATGTAAGAGTGTGTAAGATATGTAAGAGAATCTATGACAXXXXXXXXXXATGTAGGTTCATGGTTTTGTGAAACCACTTGTGGTTTTCTCTTTTTGGCTTCTTTGTTCATTTGGTGCTTGAGATGAAGGTTTCATATAGGGTATTTGCA
>Marker393934	TCATACATTTTCTTCCACTTCCTTCAAGGGCTTCAACTTATGACGAACTCCATCCTTTGTTAGGGAATAGGTATTTGCATGGTCATCATGGACAGCACACXXXXXXXXXXCACACTTGCAAAATAAACTCTTCCTTTGATCTGGTTCTTTCTCAAGGTTCTTCTAACAACTAGGGTTTCTCCCCTTTCAGCATCTTTAGAATGCTCAGAT
>Marker680921	AAACTCATGGATTATGATATCCATGCATAAAAAACAAAAATCAAAACATGTAGTCATTAACTATGGTAGAGAGGAGCTTGTATCACTCAACCCAGCATCAXXXXXXXXXXCTAGCAGGGTTGAGGGGCGGCTCTTTGAGACTTTCATGGCACATGCCAATTTTCATTGTTTTATTGTTTTTAACCAAGCTCAAAGAATTTAGATGCCACA
>Marker421201	TGGTAGCATAGGTTTTAGACCATTTGGTAGGCTATTATTAATTTGAAGTTTACTCATTTTTCCTAGTGCATTCTTTACTAGGGTATTCTATTAGCTTTAGXXXXXXXXXXGAAAGATATGAATTATTCATCTTTTTTGGATGTATTGTTAGTAGAATTTTATTTTTGATTCTAAATCTATGATATGTTATAATGTGTTGATGAACATATA
>Marker758751	ATCACGGCTGCCCACTAGAAATCAGCTACATATGCATCCATTGAACCCTAGTGTTGCAGTTACTCCAATTCTCTAAAGTGCTCCTCTTGGCCTTGCCTCTXXXXXXXXXXATGAGATGATTGTGAGCTTCCCCAACCTACTTTGCAAATCTTTGCCGGGTCTGTTTAGGGTGGGTTTACTTTCATTCTTGGTCTTGGTTTTTGCCTTCAA
>Marker249666	TGGATTGGACTTTGACCACTTGGTCCAAGTATTAGATCATGGTTTTGAGTGCATGGTTTTGGACGTTTATAGTTTCCTCTATTTCCTTGGCTTGTATGTTXXXXXXXXXXGCTATTACTCTACTAAAATTGTTATAAATCTATTTACTTGCATTGTTCTCTCGACTAGATTAGCTAGGAAATTATTAAACTTTTCCTTTCGAACCTTCTA
>Marker441375	TACCCTCATTTACTCATGATTTTAGAATTGTCAACCATAAATGTCACTCCATAATTACCTCCAGTAAGTCCAGAATTACCACTACCGGTGAAACTACCTCXXXXXXXXXXTAACACACATATCACAAGGATTTTTACATGGAAACCTTGTTAAGGGAAAAACCACGGGGTGACTAACCCAAGATTGTATTCTCTGTTAAAAGAATAAAGG
>Marker191876	AGGGTGGCAAGGGATCTGTGTATCTCCCAAATAATTATGCCAAATTTATTTCATGGATTTCATGCCCTGCGAAGTGACATAATTGCGTGAATGGAATTATXXXXXXXXXXTTCGTGTGGGGGTATTGGATTTGAAGTCTCTGAGGAAGTCATAGGGCAAGCCATGGGTTACCCATCAAGGATAAGAAGCACAACCGTCGTAGCAAGGTGT
>Marker545300	AGAAGGGGAAAGAAAACTAGAACTCCTTACAAAACCAAAATACTATAACCATCCCATAAAACTAAGAGAAGAAAATGTAGCAAAAGAAGGAGAACCCAAAXXXXXXXXXXATAAAGCCTATGCAGGATGTTGAATGGATAAGCCCCATGGTTGTGGAAAACAAGAAAACATGAGAGATAAGAATATGTGTAGACTATTATCAATCAGATA
>Marker380981	AAGTTTGACATATCTTCATACCTTAGGCTATAAACAAAATGTTTATCCTTATTTGCAAAAAGTGAATTTGTTGATATATCCTCAACATCTTCATTGTTATXXXXXXXXXXTTCCTTTTTAGGTCCCTCTTGTTTTTTTATTACTTCCACAGCCTCTCCTTGTGAATTTGATTCTTCTTCATCAATTCCTTCCTTCTTTTGTTGGGAAACT
>Marker600616	CATTGTTGGGGAAAAAATATTTGTCAACCTTTAAGAGAAGCCATATTCCAGATAGTTGTTGGTTGAATCGAATTATTCATTTTGTTAAAGAACAATCATTXXXXXXXXXXCTGAGCCAAGTAAGATGTTCTAAGTCATTTACTTCAAATGGAGCATTCCATTTTTATACCCACTTCATATACAATATATAGTAAGGACCTTATAAGTAGT
>Marker277072	AAACATTTGTAAAATATGTTGTTCAATTTATTGTCATACTCCACCAAGTGCTTAAGCTGCATCAAAGCTCATTGGTGATCCAGTGGCTGGGCTTCAATTTXXXXXXXXXXTTTCTTCACATCTTCATGTGTGCTGTAATTAAATGTGATTTGACCATCTTGATCTGTTGTTGAAACAGTGAGAATGTGGGATTAATTTTCCTTTGTGGCA
>Marker342820	CTATGATGAAGCCATATGATGCAAAGCTCCAAAATCAAGGATCCATCTCCCTAACTCAGAATCTATAACTACAAGTGTTTGCCCCTTTTGTTTCTTTAAAXXXXXXXXXXGTTGTTGTTTGTTCTTCTTAGGCTTGTTCTTTTTCTTCTCTATGCCACTAGAAGCCTTCTCATCCTTTCCAATCAAGGCTTGTGATTTTGAAGACTTCAA
>Marker389120	AGCTAGCCCTAATCTTAAATCTAACATTAATTATGATAATCTTCCACTTTAGATCAAAATTGGCCTAGATCCCAAAATTTCTACTTTGCTGGACTAGGCCXXXXXXXXXXCCCACCACACTTGTGTGCTTTTCATTTCTAAAATCTTAGTTTTGGATTGCAATCCACCATTATCCTTGGCCTAAATTCTTGCTTACATCAAAGATCTCAA
>Marker537211	CGTAAGTTGCATTAATACATGTAAGTAGACAATTGAGAAGGGGATTCGGTGTATCCCATACTACATCGTGAGTCCGTCCACCATCCCAAGGTCATCAAGTXXXXXXXXXXTGGCAGGAAAGATGTTCTGATACCACTTGTAATGTCCCTTATAGGAACAATACTAATTTTACCCTAAATTATCAATTTCCAAGTAAACAAAGATTTAGAG
>Marker420572	TTGCTGGGACGTATGCATTAAGCACAAATTGTGCATTTGTATTTGCTCTCCCTATGTTTGACATTTTTTTTACAAACGTATTATTCCATATTTGTGATGGXXXXXXXXXXTATTTGCAAGACTATCATTTTGATTTTCTACATTGTTTTGTGTGGTAGTGCCTATGTATAATAGCCATCTCAGGATCTAGATTCTCGTTGTCACAAGTAA
>Marker435926	ATATCAAAATTCTTATTCTTAGACAATGCAAACTAAAGGCCTGCTTTGCAGTCAATTGACCTAGACATGTTTGAAATCAATCACTGCATTGGACTCTTACXXXXXXXXXXCCAAAAATGTTTGTTCATCCATCTCAATGTTTGGAGATCCACTGCAAGCATATAATATTAGCTAAGATGCTATCTACTTCTAATAGGAAAATTACATAAC
>Marker245348	AGTGGGGATTATGCAGAGGTTCTTAATATTTTCCTTTGTTCCAAATTATTTGGAAAGTTTGTCCTATTTACTAGAGATGAGATGGCTTCAAAATGTGATGXXXXXXXXXXAAAATTAAGGATGGTCTTTTAATGTTTTATTAATAATTCTTATGGTGAAATTTCCATGTCCATGCCATTTCCCATTTAGATTTGTGCTTATTTTGAGGGA
>Marker646600	TTTAGAGTAGGATTTTTTTGTGCCTTTGAAATATTGGGGTTTTTCTTGGGGATCCATATTCAAAGGTAATGCATTTAGAATAAGTGGAAATGGGATTTTCXXXXXXXXXXATAATTATCAAGTTTGAAATGAATTGACTTAGAAATAGGTATATATGCATCTCTATTTACTTTCACAATTCTCTCTCAATGAACATACTTGAATTATTAA
>Marker783418	ACTCAACTAGTTGTATCCAATAAAAGTGATATTTACCAACCCAGAATATTAAATACAGAACATGGGAATATTTACTATTTGAAGGAATACAACAATAGTAXXXXXXXXXXTCCACTGCAATCATAATTTACAATAAAAGAAGATCAATGATCTACCTAGGAATGATTCATCCACACGAACATGATTTAATTGTCGATGTTGGGCCATCGC
>Marker124719	CACAACCTGAAATTAGTCCCATGTTACACGGAATTGCAGTGCTTCACCAGCCTTGCATATGAGTGCAATTCCCAGTGATAACAATAAGTAATTAAGATGTXXXXXXXXXXGGACATCCTTTGAGAAGGTTTATTTGTCCTTCTCATTCTCTCTTTATGGAAGATTTTTTCCCATGGTGTTTTCTTTTTTTCTCCATTTATGAGAGACTAT
>Marker525305	ACTTGTAATGTCAAAATTGTAGGGTATGCAATTTTTTACTTTACAATTTGAAGGCTTTATGACTAATGCAACACTAATCCATCAACTTCTAACTTATACCXXXXXXXXXXGTCTAAAATGAAGACCAAACCGTTAAAGATTTCATACTAAGGGTGCAAAAAGATTGATCAAGACTATAACCAAAAGAGTTCATCTAGACAAGAAGGGATA
>Marker428347	TGCAAAATGGAGCCAAGATGATGTCAAACAGCATGAAGACAAACCCCAAGAGCTAGAAAAACACAACAATCAGCCATATACTACTATTGTTCATGCAAAAXXXXXXXXXXTTTATGAAAAAATTGATCACCTACAACTGCACTATCATGCTTGCACTTAGAAAATGGATACCTACAACCACACATGATGGAGAAAGTAACTTTTTAAAGA
>Marker646123	AGGTGAACCTGTTTCTCTTCTTGGTGTGCCTCACACCCAAAACTGTTACACAACTGGAACAAAACACAGATAGCTAGCCTCTGAAGATTTGGTGTGCCAGXXXXXXXXXXTTGATGTCTTCGTTTGTTGCCATCCTCTCTCTATGCATGAAGGCCCACATGACCTCATCAACATTAAACATATCAAAGAAGTAAAATTTTGGATTCAAGT
>Marker328996	AGCTTTGGGATCCAGTGGTTGAGAGAGTTCTCTATAACAGAAGTGTGATCTTCAAAGAGCTCAATCCTTCTTCTATTGTTCTATAGCTAGAGAAAGAAGAXXXXXXXXXXATCGCATACAGAGATATCAAATGACAACCAAATACATAGAAGATTTCAAAGTTTGGTGTGCAGAAAAGTCAGGGACTAATGAGCGGGTGCCCTAGTCCAG
>Marker229421	AACCATTGCATACATCAAACTACCAATTGCACTCACATAAGGCACTCTAGTCATGTCCTTTATCTCAGTAGGAGATTTTAGATGGTCTTCAACAAAAAGTXXXXXXXXXXCGTGACCAACCTTTCTTTATGCTTCTCAACACTACCATCTAGACCTATCTTTTTCTTAAACACTCACTTACATCAAACAAGCTTTCAACCATCAGACAAA
>Marker769810	TGGATACCCATTTAGGTGGTTGGGAGATATTAATATTTTGTTAGTCTCCTTGTAACTTACAAATATTAGTTGTAGTGGCATTAAAAAGGGGAGGTGGAGCXXXXXXXXXXTGGGTTTTTGCCATATGATGGTTTTGTAATGTTATGGTTTCCTCTCAACTATTCTCTATATATTGTATAAATTGAATGGAGATCTCACAGGTTATTTATA
>Marker144860	GATGAAAAGCCATCTTCTTTGTCTTAGTTATAAAGTATGGAAGGCTATAGAAACACAATATACCATGCCTCAAAATGGTTTGATGACTGAAGATGAAATCXXXXXXXXXXTTTATATAAAGAGTTGATGAACTTGTCACTAGGATAAAGGGTATGGGAGGAACTCTCACTGATAAGGATGTTGTGATGAAAATTCTTAGATCACTACCAA
>Marker476107	TACATCATGCATTTTTTGCTAAATGGCAATAAAAATAGTTTCATTTGTTAAGAGATACTTTCCCACCTGGAATGGTTTTATCAGTATTCAACTTTGTAGAXXXXXXXXXXTGAAGATTTGGCAAGAAGGGGTGTGAAAATTGAAAAGAATTTTGCATGGTCAGATGGGTGTGTGTCACAATTCAAAACATCAAGGTCATTTTATGCACTT
>Marker670165	TGACCCTTGCATTTTATCCTCTTCCAATATATAATATGATTTTGAAACCTTTCCACTTCTTCCGAGACTCACTTTTAAAAATTCTCACAAAAATATTTGTXXXXXXXXXXAGATACAACATTGTTATTGTATTTATTGCATCTTCTATTGTTTCTACTTTGTCAAACTTGTGGTGTAGACCACCACCTCATTTTCCTTTACAAACACTAG

## Sheet: LG4
>Marker8575	CATCATATCCCAGTGGTGAAATACACTCTGAGGAAAAGCCTGGCCACCTGTGGCAAGTCTAAGGGTATCTGCAAACTTAAATGATTCAATGACTGGCAAAXXXXXXXXXXCAGATTTCAAAGCAGATACCCCTCATGTTCTCCTCTGCAAGGGCCCCCTCTTTGGATGCCCATTGGAACGCAGCAACAACAGAGTCCTTGATTTCATTCA
>Marker87651	GATGTTCTTGGTGATTGTAACATGCTTGTGGATGTCTCTTGATTGTGTTTCTACCTTTTGATTGGTCCATAAAGTGTAATCCAGATCATGCATGAAGCGTXXXXXXXXXXTGTAATGCTGACCTTGATGTTCATTCCAAGGTAGATGAATTGTATAAATACATAAAGTGAAGTCGTGAATGATGTAAGATGATGTGAAGATGTGAAGATA
>Marker12465	GATGACAAGGAACCACCATGGATATGTAGTTGTATGGGTGATAGTAGATACGGAGGTAGAAGGAACCAAGGATGTGATCTCCAAGGACTACGTCGCATAAXXXXXXXXXXTAGGAGAAGAGTGATATGCTGATGAGACAAGGTGCCCCCAAGTGTAGGTGACATAGAAGATCAACTTACACATGACGCCTGTTTGCCAGGTTTTCATCAT
>Marker113962	TTTCATCTCTTGATAGGGGAGATTACAATGATGTTGGAGGATGTTTGGTAGACTCTATGATTGCCCATCAAGGGTCATATAGTGTATAACTAGAAGAGGCXXXXXXXXXXTGGTGATATTGTATACGGATATGCATTTGATCACCTACAAGGATGGGTGCAACCTTCTGCATGTGATGTTGATATAGATATGGATGTGGGAGCATATCAT
>Marker32443	CTTTTCCTCCTACCCATTGTGTTTATTGTGAACTAGGTGTGTCCTTTTATCCCTTTCCCTCAAACAAGTGTTTAGGAGTGAAATAGTCATGCATCTAGGGXXXXXXXXXXCTAAGGAAATGGACTCTCTAGAAGGTTGTGGATTTGAGATTCTATACAAAAATTGTGACTATGCAGGTAATGGATGTGGTGTAAATCAACAAGGAATTTG
>Marker200046	TTAAATTTGAATTTGTTCAATGTTTAGTAATTCAAGAATTACCAAGCCCTTAGTAAACTTGAAGTGGGTAGAATAGGGTTATTGAGTAATGAAAATAAGTXXXXXXXXXXTAACATCTCTACTTTTAGCAGGATATGAGACTACAGCTAGTTCTATGACATGGTTGCTCTATTACCTATCCAAATACCCCAAAGTCCTTGAAAAAATAAA
>Marker62752	CTTTAGAAGAAGTTGACTTTCCAATAGCAAACTGGTAATCAAGGTTCACTCCAAGTATGAAATGTCCCTTCATATGCGCTGGGTTTTTATGAAGATGGCCXXXXXXXXXXTTTAACAAGGTATAAAAGGAACATAAATTGAAGGAAAGAAGGGGGGCTTTTACAAGGAGTTTTTATCGGACTTACACCTGCAGATCTAAAAAGGAATCAG
>Marker92487	TGTTTTTGTTAAAAAAGTCAAAATCTAAAAAAACATCAAACAATCATAAAAAATTCTTTGTGTGTGATGTGTCTTTCTTGCCATAATTGAGAAACAAATCXXXXXXXXXXAATGGTTCTGCAATGCATCTGCTCCATCCTGCTATGCATCTACTCCATCTTGCTGCGCATATACACTTTGTTCCTATGCATCTGTCACAGTGAGCACTTC
>Marker107096	TTTTTTTTCTCAAAACATCATCCAACATGGGATTTATAACATTCTATTGCTCAAGAACCAAGATTGCTTCTAGTTTTTCTATAATTGCTACAGCCTCTGTXXXXXXXXXXACTTTCAAGACTTCTAGAAAATGTTTGACAACATTGAGAGAATTAAAACCCTTAAGTTCATATGAGGTAATGGGGATATGGTATTGTGTGTATACAGAAG
>Marker115845	CTTTTCCATGAATTCAATACATATTTCCTTAACATACATGCATCCCTCTTATTCATCAATTTAGTCAAACCATGGTCTAAGTAATTTTTTCACCTATTGTXXXXXXXXXXAAACCTATGTATCGTTTTCATGTTTTTCAAGTTTATTTCTATTGTCCTCAAGGTAAAAGGCACACCAATAACTATTTATACATGCACAAAACAAATAAGA
>Marker66305	ATTATGCGATACATGCCAAAATGTAGGCCATAGCGTGTTGATTCTTCTTATGTCAAGTTAGCAAAAGTTTATAAATAAGGTGTTGTGCTTCACATTCATAXXXXXXXXXXCTCTCAAAATTCCAAGAAAATAAAAAACCGTAGGCAAAGAATTAATTTTTGCCTTTACACCTATTCCGATGCACAACTAATACATGCAAGCGAAAACAAC
>Marker110459	TTAAAACAGTATAATTCTAGGAAACAAAGTGTGGCATATCCCTTGATAGAACATAACTAAAAGGCTAGCTCGAGACTAATAGATGTTCTAAAAAATTGGAXXXXXXXXXXGGCAATATTCAATCAGCATCAACATGAGTATGTCATAGAAAAAGGAGATGAAGAATAAGTTTTAGTTTTTTTCAAGGTTACAAGATTCCACACATGAAAG
>Marker35109	TCTTATACAAGTTCTATCTTCTGTAAACTTCTTTCTGTAGCAAAATATCATTTAGCTATTGCTCTACTTCAAAATTTTGTCTTGACTTCAAGACCTATTCXXXXXXXXXXCGGTAAGCAAGAACAAAGCAATCAGCAAGGTCCGACAGTTAGGTCTGGATCTCTCAGAGGAAGTATCTCAGTGAAGTTTGGATTTGGGGAAGTCAAGACG
>Marker189133	GAAAGTAAAATAACATCACAACACCAAAAAGATACTGTAGAGGATGCATAGCTCTTCAAGCAGAGGAATCAAGCCCCCAGGCTAAGAACCTACAAAAAAAXXXXXXXXXXATTCTTAATAGAATAGAAGAATATAATGAGTCAGTCAATTGCTTCAAGGAAAGAATACATACAAATAGACAAGGAAGCAATCAATATGAATGAAGAAGAG
>Marker211391	TTAATGTTCACCATAAGCAATGCCTATTTCATGTTGTGTGCAAGTAATGCACTACAAGTATGTGTGATATACTTTTCATGAATGATGCATGTGATGCACTXXXXXXXXXXTGAGTATGCAAATGATGCATTAGGAATAAAGAATTCTCGTGAGATAGATATACGTGGAAAATTTTCCAATTTGAACTAAAAAAATATTCTGATAAATTAT
>Marker326090	CTTGTTTTAAAGATAATACAATCTTGGCCTCTTTTCCTTGGTGATTATTTTCCTAAAATGGTTTCTCCATGTTACATACTATGTTATGTGATGTTTTCATXXXXXXXXXXTTTGAGCTACAATGGGAGTTTTATTTGATTTAATTTTACAAATTTGTGTGTAGAAGCCATGATTGCATCTACATCTCAGTTAGATATTGATAAGTTCAAT
>Marker85129	ATAAATTTTACACATGTGTTAAGTTTGGGATTTGAGCATTCTAAATCAGATTACTATGTTCATTATAAACATGATGGTGATTGTTTCTTATTTATTGTATXXXXXXXXXXATTTGCATCAGTTTGTGTAGAAATTGATGAGGAGGAGAAATATCAGACCCTACTTTGTTATTTTCTTGATTCATGGGATTATCTTGTTATGGCTATTAGG
>Marker411385	TATTTTAAGGAGTTGTGTTGGGTAGTCGACATTTATTTTGACATCGTTGCAATATGGGTCATATTTGATCTTGTATTATAATGTGTCTCTAACATGAATTXXXXXXXXXXCTAGGTTCATATTGTTAGATGTGGAAAATCAATGTATGCCTTTCTCACTAATTTAACATATTCTATAAATAGGATTATTGTTTAATGAATGGACATGTAT
>Marker108865	AAACCTATGTTGTAGATAAAGTAACCAATACATGCCTTTTATTCATCCAAGTCACTACTCCAAAAATATTGAATACATAGGAAACAATAGATAATTCAATXXXXXXXXXXGCTTCCAACAACACTAGCATAAGGAACTTGATGCATTTCCTCAATTTCACTTCTATCTTGGGACACTATTCAACATATAGTTTTGATTAACAAGAAAAAG
>Marker193061	TTAATTTAATGTCCAAACATTCACTAATATCCTAATGACATCACGTTATACCTATCCCAAAGTAACCTCTAGAAGGGTTACATCATCCTCACATTTAGACXXXXXXXXXXATGTCATGCCTACATATGTGCACATTCTGAAAGGTATGCACATTGTTTAAACATCCAAATATTCATTAATATACATACTTTGCAATAAATGTTGTAAAAA
>Marker99781	TTCATTCGACATTAATGAAAGACAAATATTTCTTGGACTAGTATAAGAGTGGATGAGTTGGTCATGCTAGATAGGACTATAAGCTTTGTCTCCAAATGTGXXXXXXXXXXGTTTTTCTAAAGCACAACTATTCCATTTAATATTGGTCCTTGAATCTTTAATTGTTTTTGTTGGGAGGGAAGCTAGCAAGGTGATCCCAAGAAACTTGAT
>Marker74423	TTTATATTTATAGATTTGGCATCAATCTCCTCATGGCATGAAGGGCATCTTCCTTCCATGAGATCTTCACTAAAAGGTGATATCAATTGTGTTTTAAATCXXXXXXXXXXGGGCGCCCGCTCATTAGTCCTCTAGATCCTACAATAGGAAAATCTTTAGAACAATAGGAACAGGTTGCAAACAAGATTCCTAGATCACAACAGAAACTAT
>Marker321897	CTACTTTGAGGAAAAAGTTGGGTGTCAAAAGACTAATTCGCCCCAAAACTCATAAGTTTAGAACATTTCCTATGAAACAATTTGGTGAAGGAAACAGGGAXXXXXXXXXXCAGTGGGGTAGATGATGATGTGGTTAGTTGGGTTGATAAGTATGCAGATTTTCAATTTTGATTGAATTGATGATGTGGGTAGTTGGTTTGATTAAATTAA
>Marker18697	TCACCATAGTCTAAACTATAATGACATCGATTTCATACCTCATGCATGTGCCACAATGAGGTGTGCCAAAGCACTCGGTGAGCCCAGCAAGCCCAAAACTXXXXXXXXXXAAACAAGGTAAAATTTTAAAATTTCTATTTCATAAAATTATTCATCCATATACGTTGTCATGTCCCAAGATGGAGGATTTATTTCTACCATGCTTGCAAA
>Marker198765	ATGAATTACATTAGTTTAAGATTTGGAGGCTAGGCTTTTTGAAAGGTTTTTCTTAGGATAAATATCGTCATTGTGGTATTGCTTTTGTGTGTATATTTTCXXXXXXXXXXTATGGTGATGATGAATCATGCACTACTATTATAGGTAGGTGGATGGATAGGGCCCATGAAATCAATGGCTCATTTATCAAATGACTCTTGTGATAGAAAT
>Marker96048	CCCTCCATGCCTCTTAAATCCCCCTTTCCATCACAAATCACATCATACTCCTGAAACATATATTACCCTTCCTCCCCCATCATCCTACAAATCCCAAAAGXXXXXXXXXXATACAAATTTGGATGCCTCTACCCATAAAGAAAAAAATTCTAAAGATACTTATGTCTTAGGGCATCAATGCAAAGAGTCTACACAAAATCTATCCAAAAG
>Marker22891	TATGTCTAATACTGAATTTGAATAAAATATTTTTTTTAACACAATTTTTGTAATCAAATTTCAATCACTTGAATGTTGAGATGTTCTTATCAAACTGTATXXXXXXXXXXAAGATCTAGGAGAGCCTAGAAAAAGATCTGGAAGGAGAAATAGGTTATATGATTTTGCATAAGTATGTGGGCAAAAGTTTGACAGGTTAATAAGAACTTG
>Marker23115	CTATCTTCTAAAGTTCATGCAAAAGTGAAAGTTGTGAGAAGAACAATGTGCTAACATGAGGATTCTTGTTTTATTGGAAGGAGTTGTGTTTGATGTTTAGXXXXXXXXXXAAAAGATTCTAGAGCTATTAGAGTGAAGACAGAGGTTTAGGATGGTTGCAGTTAGGATATGTCTAAGAACTGCTCCGCATTTCTCCGCCTTTGAAGATGA
>Marker54579	GCCTCCATGATGCTTCTCATTTAGAATTTACTTGTTCACTCTATTAGAAGGCTATCAAACAAGTGTAAAGGCATTTGAAGATTTCCATAAGCCCAAAGGAXXXXXXXXXXGAAGCTTTGGTGCATGGATTGTTGGTGGCCCTCTAGAAAAAGGTTAGAGTTATTAAAGTATTTGGTGATTTAGAATTAGTCATCAAACAAGTGAGAAAGT
>Marker210840	AAATCACAAACCCTCTTGAATGAAGATAGCTATGGGCTTTATACACTTAAATCTAGAACCACAATGGTAAATTCCATTCCGCAAAGAAGTGTGGAGCACAXXXXXXXXXXTGTTGACATCAATAACAACACTCACTGCTCATACTTGCAATAAAGTGGTGTGGGATATAATCCCAAAATTTAAACTTTGGCTATATGGAGCATGCAAAAG
>Marker165420	TATTATGATCATTCATATACTCCTTATGGAAGCCTGGATCTACTTTTTGTAGTCATGGGGCCAAAATTATGTTGTCTTTATGTCTGCCTTATTAACCATTXXXXXXXXXXATCAAACAAACTACCTTTTAATATCTTAAAAAAAGACTCCAAAATTGCTTAGCAAACACACAGTCAAAGAAAATATGTTCACAATCTTTAGGCAGATTAC
>Marker57697	CAAGAACACATCGAATAGCGAATTCCACGCTATTGCACTCCACTTCAAATATCTGCCTAAGAAAGACAGTGTTTAGTGCCCCGTGGTAGATCGGTTCGTCXXXXXXXXXXAAGGGTCTAATACTCAATTAATACATATGTGCCAAAAAGCCAAAGCCAATACTCCAGATTGCTTGGCCAGAAAGGGAAGATGATGTAGTCAATACTAAAG
>Marker33892	CTCAGGGGTGGCAGTGTTGGATAAGATATTTGCTCCTGGTCATCTAGTGTATACCCAGGATCGATGGCAGATGAGTTACGCGCAGACTCTATTAGCTGGGXXXXXXXXXXGTGATTAGATGGCATGTGTCAACTTATCATCGGGCTTGGTTTGAGGCATACGTGTTCTTGTATAGGCCACCTATTACACATACCCACACAGGGTAGTTAC
>Marker109907	CTCAATGTCATCCCTGATAGCAAAGTATACAAAAAGCATTGTATTGTAAGCTACAGGTCTACAGATTTGAAGATTTGTTCTAAGACCATGATGATTCAATXXXXXXXXXXAAGTTAGAGAACAGTCATACAAATTGCATACACAATCATGAAGGGTAGAGTATCATGAAAAAACACAAATGATAGATCCATGAACCTTAAAAAAATTTCT
>Marker119562	CTCGCCTTCTATCATCATGGCGGTGAAACTCTGTTGCAGGTCCGCACTCTCCACCACTCTCAGTGTGCAACCCTCATCCTGACCCTCAGCCAAAGTCTCCXXXXXXXXXXTGATGTCACTGATCCTGCTGCTGTGGTTGGCACCCATGTGGTGTCTGATACCGACAGAGTCGACATTTTGACTAGCACTGACTGTGATGACTAGGACCGA
>Marker395412	ATGATATCAGATTATTGAGCCTGTCATTTCAAATAATTGAATGATACCAAATTCTGCAAGTCATGTATTGGACATCATGATATCAGGCATGTAAATGCTTXXXXXXXXXXGCAGAGGATCCTGGAATGCATAAAAAAATTAAAATGCAACAGATAAGGAACAAACTTCATCTACTACAAGTAGGCATAACCAGGAAGGATGGAGAGGGAA
>Marker288288	TAAAGTTTGTGAGCTTTCATGTTTGCCTTGTAGCCTTTATTTGCATGCATCTCCTTTCTAGATTCTTATTCATGCACTTCACCTAAGTTCACTTGCATTCXXXXXXXXXXATTTGACAGTCTTTGCCATCTATAAAAAAGTGTGGGCTTCAACTACTGAATCCTGGCATTTCATTTGATACCCTAGGCAATGAATGGTTTGGAACGTGCA
>Marker191868	TTAGTCTCAATATCCCTTACTTTCTGCATGCTAGCTTTCAATACATCAAATTCAAATTGTAATTCCATGACCCATGTGTCTAACAAAGGAAGAGTCATATXXXXXXXXXXGGTATTTCTTCCTCACTAATTAATGTTAGAGTAGTGGGCTTTTCTGTAGCCTATAGGGTTGATGCTAGGCTATCTATATTCACTAATACCTATCTAAACT
>Marker105091	TGGTTTGCATTCTCACACTTGGTGAAGGTGTTTAGAGTGATTTTCTGTGGCCTTTGTTGTTGGTCCAGCTACAACATCCAAACGAAGTTGTAAATCTTGAXXXXXXXXXXTTACAGTGGTATCAGAGCAGAAGATCTTGTCATCCTGTGATATAGATACAGACATGCAGTGAGATTTGAGTTATGTTACCTATGCAGCCATTGACACACC
>Marker261257	GTCGACCATAAAATACTAAAGACTAACACAAAGTCATAATCCGACTAGAGATTTTTAAAGTTATCTAAACCCTTATGGGTAGATGCTATGGTTTGACTTCXXXXXXXXXXATAGCAATCCAATATCTTCGATCTCTTGGTCTTCGCAAGTCTATCGACCATTTGATACTGAAAAGATTATGAACTCTTGTATTTCATCCTAGAATATAAT
>Marker180835	TATTGTCTTGAGCAGCTCTCATGGGATGCATGGCTAAATGGGTAATGATTCTCAACAAATTTGACATTGAATATATAGAAAGAAAGGCCATCAAAGGACAXXXXXXXXXXTGAAGCACTTACAAGACTCTATATGGCAATCCAGTGGAAAATAGAGAACCTAATGGTTTATGGTGACTCTTGAAATTGGTCATAAAACAAGTGAACAATG
>Marker369634	CATCCAAACATGTAGATGAAATCTTCTAGAATGAATGTGGTAATGATGGATTAATGAATCTCAGTGTGGTTCATACCATAAGCTCTCCTAGGTCTAATGTXXXXXXXXXXACAAAGTGAAAGAAAATATTTTTGGGTAATGTAGGATTGCTCTTACACCTTGGGATGTTCTTGCATCAGAAAGGGAGTTGAATTTAGTTATTGGGATGTT
>Marker347270	CTTATTTTGGTAGTCGGACAAATTTGACAGTCACTATATTTATCTTGCACTCCCTCTAAAACTGACAAACTTCTAGTTTATCTGGAGGGTTTTATATTTGXXXXXXXXXXTAGATTCTCACAGGTGACACTACATGGTTCTCATTTTGGGAACTTCAAAGTTGCATAAATTTTGCATACGACCTCGGATCAAGGTGATTCTTGTTTTGAA
>Marker81278	ATAGATAGCAATCTTTACATCAAGGAAGAAGGAGATATGATATTGATAGTTGTAGTTTATGTTGATGACATAATCTTTAGTGGAGATGATAACATGTGTAXXXXXXXXXXTTGGAGTATTGTTGTATTTGATTGCATCTAGACCTGACATCATGCATGTGGTATGTGTGGTTTCTAGATATCAAGCCAATCCTAAGCAAACACATGAGAA
>Marker69547	TATCCCAATTACCAAACATGAAATAAGGTGTTTATCAAACAATGTCCACATGACAAATAAGACAAAAGCATTAAGTAAGGCTATGCATGTTTGACACCAAXXXXXXXXXXCATCACCAACAACATAAAATACCTCATATCATCATTAAAATTTTATTCCAATGGTCTCAAGACCTACTTTACAAATATTTACAATGTATCAAAATGAAAT
>Marker160016	CTCATTCTATAGGAGATGTGTAAATAACTTGCCCAGACATCCACATGATTCTCCAATTTGCAGAAATCCTCTGTATTATATTCAAAACACAATCGTTGTAXXXXXXXXXXATATAACTCCTTTTTCAAATTTTCGTTTCCTTTTTTCTACAAGGACATAAGATAAAATATTTAAGCTAAGAGTTAGATCCAGAGCCACTGTTTAAGAACC
>Marker397684	ATTTTGCCTGCTTTTTGGTTTTCTCCTTTTGAGGTTCTCAACTAGTTGCTTCTGATATTCTTCTTTGGCTTCTAAAGCTACATGAGTTATTTCAGTCTTTXXXXXXXXXXATAGCTTAGTTTTCAGACATTTCTTGACCTATGACTATACGAGTTTGGCAAGGAGCTCCTTTACATTGGCTGTAAGCACCTACAGTAATTGAGCTACAAA
>Marker246194	ACATGTTGAGGGAAAAGCATGGACAAAATATTTTGGGAACTCTCTCCCAATGGAGTTGATTCTTACAAATATGAGCTCTATTCCATTATCAAAGATCTTCXXXXXXXXXXATACCTTTGAATGAAAGTGGGGGGTTTGAATGAAGGCCTTTTTTTTCTATTTTTAGATGTTGCACATTCAAAAGCTCTATGGAAAAGACCTTTAAATGAA
>Marker258825	CAAAATGTATAGCTTAAACAAACTACTAACACATAACCAACTAAACTATTTTAAAACATGGTTCAACAACAAAGATGTATGATGAATTTCTAAGGGGTATXXXXXXXXXXTCAAGAAGTGGCAATATTGGATTAAAATTCACATTTCTTGACCTTGTCCAATGCAAGCAAGGGTAGGTTGACTGGGTCAATGATTTTCTTTAACATTTTC
>Marker198808	TTTAAAACTAGATTTTAAAATTTGTTAATCATGTTCTTGTCACATCTTGAAATTTTGAGCATGGAGATCTTGAATCTCATCCAAGATCATTTATTCTTGAXXXXXXXXXXATGTGAGAAGATATTAAGTGTGCAAATCTTGTATAGAATGAGAATGCCTAGTAAATTATAAGAAACAACTAAGCATAGAGCTCTTATTTATACAAAATAA
>Marker116991	AGAGTATTGTTGAGTGTTTCATATCGACTAAGCTATGTTTCTTCTTCTTGTTGGTTGCAGTTTGGTAGTGCACTATCTTTTATGTCAAAGTATTCCCCTAXXXXXXXXXXGCATAGGTGGCATTTCTTCTAGTGGTTTTAGTGCTATTTAGGCAAAGGTGTTGGGCCATCATTGGTCTAGGCTGATGTGGTGGGCTCACATTGTTTTGTT
>Marker139097	TGAGATTTCAAAGAGGCAGTGGTGTGCTCATGTGATAGTTTAGGGTTATGCTAGATGTCCAAGATAATTCAGTTCTTCATTAAGGGGAGTGTTAGAGTAAXXXXXXXXXXTGTTATTTTCTTAGTTTTCATCAAGGATGCCAGGTGAAGAGTTACGTAAAGAAATAATATTGATTAGATCTAGCTACATTCATAAGCTGCAAGAGAAACT
>Marker156340	TAAAATTTCACAGTTCTATTTATAGTTGCTGATTTCTAGTATTCAATCAATTTTTCTTTCATTTTCCAAGAAATTAGCTTCTTTTCACATATCTTAGCACXXXXXXXXXXTGAGGCCAAAACTTTGTGTATGAGCTTCACAACCCAATCATCCAATTCACTATATATCATTTGTAGAAGTTTATGACATGCCACTATAATGACTCAATCT
>Marker432238	TATGTTAAATTATGAGCATTATGGAATGTGATGTTACACTTTCTAAATCTACTCATCTATCATAACATGTTTTTGGTAGTATACTTGAGTGTCTAAGTAAXXXXXXXXXXGCCTTGTTGGGATTGTGTAACCTGTTATGTTAAATGTTGTGTGTTTCAATTGTAATTCATTATTACAAAGCATTGATGTTTTATGGAATCCCTCAACATT
>Marker225986	GGAAGCATATCTTCAAATAGCCTAAGTCTGGTAGAGCATAACACAGTGATATTCAGAGCAGAACACTCAGTTGAATTGGCCCTCATTCCTTCGGTGTTGCXXXXXXXXXXTCTAATATGAGTTTGAGCAAGTCTTGTGGTCCACAGTAAAAGATGTGGGCTGACAGATGAAGTGAACCAATGGCTATCCGTGTTTAAGGCCAACATGATA
>Marker364618	TTGAGTGCATGATGAAGAGGCTTAATTGTGGTAATTGTGAAATAAGTATTCAAGAGAATGTGAACACTCCACTTTGTCTTTTCTCAAAAGAAGAATATTCXXXXXXXXXXCTTCCAAAATCCAAGTTTTTCTAAAGGTAATCCTTGTGTCTTCCATTATTTTATTGCTAGCTCATGTTCCTTCATATTAATTGTTTATTTGACTGTTTAA
>Marker23976	AACAAGAACTTGTTGAACATCATAAAGAAATTGATAGAAAAGAACCCAAGGGAGTGGAACACCCTATTAAAATACACATTGTGGGTCGATAGAACTTGGAXXXXXXXXXXAGTCCTTATGTGGGATAAAGCACATGAAAGGAAAGGGGATCATGGTAAATTTGATAAACTTTGGACAGGTCCTTTTCAAGTTTTAGAAATCTTAGGAGAC
>Marker532623	TCATTTTACAATTCTTCTTCAGAAAACAGCTGCATACCTATTTTTCTTTGCCAGATTTTGACTTTATCTGACATTTCTTTGAAAAGGGATCTATAAACATXXXXXXXXXXATGCAAAAGTGGTTATAAAGGATCAACATTACAAGAAATGTCCGCAAAAGCAAACTAGTTATGCAGTTGTTTCCTGGAAAAGAATTATAGAGTTTATTGA
>Marker146428	ATTGATTTCTTGAAGACACTTGCTCCACAAGATGTCCAATCTTAATCGTGTCTTGGATTCCTCTTCCAACCTCAATTGTTCCTTGACTTGACGAATAGCTXXXXXXXXXXTTAGGCAATATAGCTCCTCGTGTCCATTGGTGTTGTGGATTCTACATCCCTTCCTTGATGCAAAGTCATCCAAACTCTTAGGATGAAGTTGTGTGTTCAA
>Marker156217	TGGATATTGCTATTCTTCATTGTTTTGTGGCATTTACCTTCCCTAATCTTAGCATTTGGAGGCATTATTGTTGCTTCTCCTAATTGTAATACATTATCCTXXXXXXXXXXGCAAAAACCCCCAAAAAATACATAGAGCAAACATATATAGAGGGGTGTATGTTACATCATCTGAAAGAATAGCTTCCCCGTAGGATCTAGGCTCATCATT
>Marker296228	GTATCCATCCTCACCCAGCACTGGCATGGTTATCAAGCTAGCCACTCTAAGCACCCCTTCTCTGTGCACCACCCTAAGGTTGCTCCCACAACCTACCAGAXXXXXXXXXXCCTTCAATTGACATGTTCTCTTAATGCCTGTGTTTGTGGTTCCACACATGCCCAAGGCATTGCGCATCATAGCCAAGGTATTACAATTATCTATGCAGAA
>Marker122452	GATGATACTAATCCCTTCTCATGTTCATGTATTTCATCATCAAGTATTTCACATCACAACTCCTCTGATCACCACTCCTTTGACATCAATGACAACATATXXXXXXXXXXCCTGGTTAGATGCAACATCTGTCCATGTAATTATGAGAAGGAGAGGGAGGGAAATCCAATCCCTAACTTCTACCTGAGATATTCAAATGTGTCCTTAGAG
>Marker67548	GTGATTGAGAGCGATGTAGGGAAGATTTGATTCATTACCTTGTGAAAGCATATAGATTGTTGTGTAATGGAGTTTTTGTTTGGTGTAAAGGATAAAACTTXXXXXXXXXXTAGTAGTTGCAATCTTTGAATTGTGTATAAGTTTGTGAAATTGTGATAGCATAGAGTCTCTGTTGCATTTTGAATTTTGTGTGTTGTATTGGCAAGAGGG
>Marker414582	TTTGATATCGTTCTAAATAGATAGAATTATAAATTTCCATATTTCTTTTAAGATCTTTCTCCCCATTTGTGGGTTCCTAAAGAGTTGAGTTGTCTTTATTXXXXXXXXXXAGTAAGCTTTTGAGAAAACACATAGATATATGATGCATACACAATACGTAAGACATGAAGTATACCCCTAAATACATGTGAGGCCTAAATCATACACATA
>Marker169873	TAAATCAAGTATCCCTAAGTCTGCTTATGCTACAAGACTTAATATCTTTTGACGAGGGAGATACCAGCCTAGAGCAAGCATCTTATGAACATCCTCCATCXXXXXXXXXXTCCATCCCTTATATTGTCCATTCACGCATACCCTAATGCAGGATGTGATCCATTGGCTACTAGCTAGGAACAATTTATCCTCATGTCAAACACCTATCTT
>Marker108258	CTACTTTTTATATTATTGCTATTTATTTTGAAATGTAAATGCACCACTTACCATTTGCATTATGAAATGTTGCTTTTATTATTGTTTTTGTTGTTATCTAXXXXXXXXXXTATGAACTTTTTCCATGTCAATTAATGTGGCCATGCCAATGGAATGTTTAATTGCTAGAAACTAGAGCTCTAGAAGGTTGACCTGGTTGAAATCAACCCT
>Marker207427	TATTCAATCAATCAAATTGTATTTGCTTCCTCATGTTTGGGGAACTCACAAATTGGCCAAATGACTGATATAATTTGATAGAACATGTCATGCATCTACTXXXXXXXXXXCTCCTTAGCCTAAGTAATTATATATTATATTTTACACATGGCTTTAACACACCTTAGGTAGGTTATGTGACAACTTGGAGAATTGGTCAAACTCATCCAA
>Marker240786	TAGGATGCTTTATGCTGCTTTTAAAGGATTTAATAATCTTCATGGATGATTAGTTTGCTTAAATTTAAATTACTTAGCTTAGTGGCTTCATAAGATACATXXXXXXXXXXAGAACCCTCAACAAAACTCCATTTGAACTGCCAATGGACACAATTAGCAGTCAAACATGTTAGTTATAGTTGCATGCATGAAAGGACATCATGAAACAAT
>Marker275075	TAAATCTTTGTCAAATAGGGCTTCATGTCTTGATTCTAGCTTGACTGATTGGATTTGGTTAATTACTTCTCTATACAACAAAAGGGAAAAACCCTTGTAGXXXXXXXXXXAGAGGAGCTCTGGAGAGATGTTGAGACATAGACAACTGAAGGCCTGATCGCACTTGTTTAACCATTTAGCTTTAGCATCATCATCAGATGGTTCCATTTA
>Marker193210	AAATTATGGAAAAAATAGTCTCATTCATGGAGCTCTCTCTGGTGGGTAAGTTTGAGGCCTTAATAAACCTAACATTGACATAGTGAGGAGATGGGTTTCCXXXXXXXXXXAAATTAACACATAAGACAAGGATTTTTACGTGGAAATCCTGTTAAGGAAAAACCACAGGGTGACTAACCCAAGATTGTATTCTCTATTAAAAGAATAAGG
>Marker146408	TAGAATTTGAGGTTCTTGCATAGTATTATCATGCTCTTGTGTATATAGAGGATTTGATGATGGTTTGAGAATGTCTTTGTAAGTATCAGGTATGAACATGXXXXXXXXXXAAAGATGATGGGTGTAAATGGATAATCTGTTGGCAAGAGACACTGTGTGGCTTCATAAGTGTTGTCATTGATGGCAAAAAAGTCTATCCCACACATCTGC
>Marker194120	TCAGAGGTATTTTTATTGGCCAGAGATGCATCATGATGTCATTTCCCATATTTGTGCTTGTTCAGATTGTGCTATTGCAAAGCCTACAAACCAAAATCAAXXXXXXXXXXGTATATTCCTCAGCAAATTTTGGTCATCACCTTGGGCCATGATGAACACCAAGTTGACAAAATCCACTGCATTCCATCCACAAATTGATGGACAAATTGA
>Marker275830	TTTGGGGTTTGTTATAGACAAAGGGAAGACCGTTTGACTTAATTGATAATACTCAATCCTTGTGATTGATGTGACAAGAATAAAACACACCAAAAAGAGAXXXXXXXXXXCAACACACATAACACAAGGATTTTTACGTGGAAAACCCTGTTAAGGGAAAGACCACAGGGTGACTAACCCAAGATTGTATTCTCTGTTAAAAGAATAAGA
>Marker431201	TTCTTCCTTTATCTCTCTATTTTTGTTATTTAGATTATCTCTTTCATGCAATAGTGGTGATATATTCTCTATTCAGTTTATTCATGTCACTTGGAAGCCAXXXXXXXXXXTCTTCATAACAAGTTAGCATAGTCTCTTTTCTTCATTCATAACACTTTAAGGATTGTTGATGTGGTTGTAATGAAAAGTTCATTCATAACAATAGGAGGC
>Marker67698	TTTCAACCACCCACCTACATATCTCCAACAAGATGATCTGGTCACCTGGATACCTGGGCAGTTTGTATGGAGCCTTGTCAAATCCCATTACCTAAATGTAXXXXXXXXXXGCTTGGTAAGCCAGGAGGTAAACTAGATAAGAAGTCATGTAAAATTATTTTGTCTCCATGACTTAGACAACAACTGATCATTCAACTTGTCACTAATGAA
>Marker172192	TGTATAGTGAATGATAAATTATGATAAGCACATGTGGGCTTGATATGTCATCAAGGAAGGTAGGTTGCCCCCAACATGGGGTAATTTAAAGATAATAGTGXXXXXXXXXXTGCCCCCCTAATGCAACAAGTGATCATAATGATGTAAGATGTAAGCATGTTCAATATCATACCAAATAAGAGACCTCATATGGGCCAAATGATGTGTTAA
>Marker192606	CTTCCTTTTACATTTAAGACACAAAAGCTCTACTTGATTGAGCTATAGTGAAATTAGGTAACAATAACTTTTTAAACATTTCAATTAGTGTTTATATTTTXXXXXXXXXXATTTATCAAATTGGGGAAAAAAAATAATCCATGCACTAAAGTTTTGAGTTATGAATACACAAAAAATATAGAAGGAAAACAAATGAAATTTACTATATAA
>Marker60812	AAGTTGCATGACTAAATGAGCTAGAACTCCTAGATGAGAAATGACTGGATGATCTTAATCATCTTCAAGCCTACCAGAAGTGCCTACACAAAAGCTACAAXXXXXXXXXXAAAATATAAAAAAGCCAAAAAAGCAAAAAATTCAAAAAAAAATTAAGAAAAACCTGGGTGCCATCCAATGGTGAAAATCACTTTGGTAATGCCTTGGATA
>Marker143471	TATCCCATATCTGTTTAAGTGTTGTAGAATCCTCAATATGGAACAAAATATGTAAAGCAATCAAACCCATAACCTCATTATGTTTGTTCTTGTGAGCAAAXXXXXXXXXXGACTTTATAATTAGTGCAATTACAGTTGCCGCTTGCTAAATTAACAAAGAGGCCTTGATGTTAGTATATTGCATATGTCAAATTAGGATATAAAGTAGAA
>Marker321012	ATAAATTTGACTCCTTTGTGTTTGGTTTGAGATTTTTGAAATCTAAATAAGATCATTGCATTTATTATAATATGGATAGTCATTGATTCCTTGTTATTGCXXXXXXXXXXGTTATCTATAGAGCAGTGTTCATCTACATCTAGTGAGATGAAGGACATGGCTTGAGTAACATATAATAGTGTTGTAGGGAGTTTGATGTATTCCATGGTT
>Marker177358	TTTACCGAGGGGTTCCTTGTCTGGAGATTTGTGTGTTTCCAGAGATGGATGTGCTTCAAGAAGAGTTTTAGTAGTAGGCAACTGATGTGACTCTGAAATAXXXXXXXXXXTCCATGTTTAGTTTCTACAAGAACTTCTATTGTAGTTCCTTCGACAAAAATTTCTTCTACAAATACCTACCCACTATCCACAGGCTCTTCTTGAGCTTAC
>Marker247902	GGTCTTTTACTAGGTTAATTCATAAATTGAAATCCATCCCAAACAAACTTAAACCATTTTTATAACTATCATTTTATTGAGCACATGTTTGGTTAAATATXXXXXXXXXXCTGAAACCCCTAAGTATAAGGAGTTGGCTAATTTTTAGGGGGTTTTAGACAAATCAGTTGGAGGAACCAACAAATTGGTGACTCTACTGGGGATTTAGCT
>Marker97761	AACAATAGGGATTCTCCTTGGCGGCATTCTTCCTTGGATCAAGTGTAACTACTCCAAGTTCAGTGATCGAGATACAAGGTGACAACTACCTCACAATCAGXXXXXXXXXXTTCATTCATTCAGTATATCATAGAATTCAAATACAAATTGGCCAAAAACATGTGGGATTACAATTAGGGCTCACATGCCTGATTTCATAGTTACAGAATA
>Marker285936	TCCATTTAATGTGGATAGGATTGAAGAGTGTGGAGAAGAACCTATGGAAATCTTCAATTTCCATAAGGTATTTAATGAGGATGTATATGCTGCAGGTTGTXXXXXXXXXXGGTTGGTTGCAACCTGAAAGGATGATTCTATCACTCAACTCAACTTTTGTGAGTCTATGCTCACAAACTTTTACCTGACATGTCTGAGCACCCAGACACA
>Marker150492	CTCTTGGAGAGAGATTTCCTCTTGAACTTGATTTACCTAAACAACTTCTAAGTTAGATTCAACCATTAACTTAGCTAACCCATGTCCTCTCACTAACTTTXXXXXXXXXXTTCACATCCTTCATCATTCGTTTGCAGTAAAACTGTAGCTATGGTGTGAAAAGAAACAAACGAAAAAAGTTGAAATGGCCTTGAAAAATAAGGTGATTTC
>Marker113484	TTGATGCATATTGTTCCTATATGTTCATTCCATATTTTTGCATACACAATGATCTCCTCCACATGTAAAACATCCATCCTTTGATCCATTTTACCCAAGTXXXXXXXXXXCATTATTAATGGACTATGAAGATTCACTTCAGACCCAATTTGGGGTTTCAATCCCAAAATGAACTTCCTAACTCGAAAGCATTCATCATGTTGATAAAGA
>Marker125564	TTCTTCCTTTTCTTTGTTATTAGCAAGTCATCATCTAATGGCTCCCCATCTAGTGGTTCCTCCTCTTCCTCTATAATCATAGGAGTAGGGTTTGTAACAGXXXXXXXXXXATCAACACATGAGAAGAAACAAATGAACACAGAACACTAGGATTTTTATGTGGAAACTCGGTTAAGGGAAAACCATGGTAGGGGTTAACCCACAAAGATT
>Marker267024	ACTATCTCAACAACAAAACCAAGAGTTGGGAATTGATACAATTTGTCATTTAAGACAAGTTTTCTCTCATTTCATTGCCTCAAGTATCCTAGGCTATGATXXXXXXXXXXGGGTTTTTGTAACACTTAACCTAGTCAACATTTGTCCTACCCATAGGTAGTTAATTACATGTTATAACCTTCTAAGTATATATTTCCTAGACAATACTTA
>Marker250581	CAATTGTCATGACCTCTTGGTTTAGGTAGATTGGTAAAGCCTTGTTTACTCCCAGGCATGTTAAGGAGGTCAAAACAACAGATACCAAGTTTGAACAATAXXXXXXXXXXTTTTACATATGTTATTCAGATTCCAAGCAGCGGATTCAAAGATCTTGTAATGCTATTGTCAGCAAGAAGTCTAAGACATATTCCCTCATCCTCAGCTTAA
>Marker139125	CTATTTCTTTATCTTGTGGCTCTATGGCTATTGGCTATTCTTAAATATCATCCATTGAAGTGGATGATATTTAAATAGAGTGCTCGGAGACTACTCTACAXXXXXXXXXXATCCACACAAATCACGTAGTCAAACTAGGTTGCTGAATACTTGCACGTCGACACAACAATAAAAAATCACATCTACGAACTGAGTGTCCACTACCATGAT
>Marker381769	TTCACAATGGATGTTTCTTGTCAATTGTTAAGAGATGGTTTGCCTACTAATGTTAACATAGGATGACTAATGACTAATTACCTACATGAGGATAAATACCXXXXXXXXXXATGGGAAATTGGGCTAGGCAAATTATGAACAATGAAAGGTGGCATAATTGGGTGTCGGAAAGGGCCTTGAGTCAATGAGTGTGCAAAAATAGTCAAATTA
>Marker236330	CAAACCTAAAATACCTAATAGAAGCTTGCATGTAGACCTTCCCCATTCCTCTTGAGCAAAAGGGAAGTCTAACTAAATAGTGAAAACCCTTGGTGGTGCTXXXXXXXXXXAAGTAAATAGGAGGATTGCTGATGTCCATACTCTTAGGTGGAGATAAGTCCAAGCTCGAAGCTACGAGGGTGGCATCTATCAGAGAAAATAAAAGAGAAA
>Marker271013	AAGGCTGGAAATACATTTTCTATGATAGAATTGATCACCTACAATTGGATACTCATGTTTGCACATGGAAAATAGATGCCTACAACCACATATGATGGAGXXXXXXXXXXGAAATTGTCCTTGCCACCAAAGTTGACTTTGTGTTTGAGCAACAAATTTGAGCCATTGGATCAAATTGATCATAGCCACTGGATCTTGAGGTGAAAACTT
>Marker207318	TTTTTAATTAATAAAGGAGCCTTTTTTTACCTTCTCATAACTGTGGTATTCTATAACATATTGAAATGATTGATCTTATCTTGTGATGAAACTATGTAACXXXXXXXXXXCAAGTATAAGTCATCAAACATTTAGCTGTATGACCTCATTTTCAAGCTTTAAGTTCAATTTTGTGCTTAGTTCTATCCCTTTTCCTTGTTGTAGTAGTAG
>Marker137684	AAACCCTAATGAGGCATCCACATCCCAATCTACCCCATAATCCCAAACATCCCACTCCCCATCTAAAACTCATGTAATTCCTAAGTCCATTTGGGTCCCTXXXXXXXXXXGTGAAATGCGGATTTGGAGAAGTCAAGAGGACTACCTTGAGTGGTATATTCTAAGGATTTAGCCTCCGGTGATAGATGAGGAAAAATATATGAATAGTTG
>Marker182728	TCTGATATGTCATGGTTTCCTTCAATGTAATGCTTATTCCTTTATGTATTCAAACTTGTAAATGAATAACCATTGTGATGAATGAATACTTATATCATTTXXXXXXXXXXCATTTTGACAAATGAGATATACAAAAATGGAATAAACACTGCATTGAATGAAAGGAAGATAGATTAAATGTCCCACACAAGCCATGGGAATAACTGAACC
>Marker176053	TCATTTATCAAACAATCTTCTTTCCATCTATCAGATCACGCATGGTGGAGCAAGGAAGACTATGGAATTCACACCTGATTCAATTATCATTAGAGACTTGXXXXXXXXXXGGGTCTTTACACCTACCTTCTCCTATTGTGTTGCTACCCACTATATGGCACATGTAGCTCTCTATGTTTTCTTGCTTCCATTCATGGCAATACAATCTCA
>Marker143629	CTTTCCTCTTCATGCTCAGGGCTCTGTTCAACTTCCATTTCAGCCTGAGTGCTTTGTTCCTCCTCTTCACTTAAGAAATCACTAGATTCTTCTTCTATTTXXXXXXXXXXTCTAATTTGTTGCCCTGCTACCTCTTTGGAAGTCTGTGCTTCCTCTGCACTAACCTCATGACTTAGTGAATTTGCACCTACAAAAGTATCTGATGACACT
>Marker142864	CACAATTTCATCAACAAAAGTTTATTCACACATTTGAGTTGCTTTATTTTTCCAGCACTAGAATTTCAAGTTATGATTGTAGATGGGAGTATTGTTAGTTXXXXXXXXXXCAACATGAAATACACAATATATGATCAATAAAAGCACACCACAAGTCTGAAATTTTGAAGACAACTCTGCTGTTATAAATCAGATTATAGAAGTCTGAAA
>Marker173070	AACATATATGATGTATCATGATCATATTTTTGATGTATATATATGATGAGACATGGTGGTGACTATATGATATTATGATGGATGTGATGATGTATGTTTAXXXXXXXXXXACGATTTATGATGGATACACATGCTAATTATTGATGTTTTTTGATATTATGGATAATGATTATGTTGAAGTAGATATGTTATGGCTTATGATTATGGTAT
>Marker117661	TTTGTGTCTATGAGACTCCTAGTAAAGCTAGTCAAAACCTTAAGTGGTTTATCAAGTGCTCATAATTTACCGATCCCTCGAATGTTCCCCCACTGAACACXXXXXXXXXXTGTTGACATTTGCGTTGGAGATTCCAAGTTGTGGGCTTGGCAAGTCACCATTCACCTTGACCTTAGGTAGTTTAAGCATTGTCTTCAAGTGCTTTTCGAT
>Marker201389	TAAGATGAGGGTAGGTTGGGTGTGATCCCAACCAACAACTGGAAATCTAGTGATATAGGTATAAGAATTTTCTATTTTAAATATTTTTTGAATTTATGAAXXXXXXXXXXACTATCATAAATGATTGTGTTAGGTAGTTTTTATTAGAATAATGGGATAGCGAAAATGTTTTATGTCACGTGCTTTATGATGTATAGGATTTGGTAGAGG
>Marker344012	AATAGTAAATTTCTATCTTAAGTAGATGTGTTTTATTAGTTAAACTACTCTTATCTCTTAAGTAGACTCATTTGGTAATCATGCTATCCATGTTTCAAATXXXXXXXXXXAAGCCAAGAATTTAATGGCTTACTACTAATAACCAATCTTATGCTCTCACCTTGCCCTTCATAGGATCTTAGTTGATCAGAAATTGGGGAATGTAACTTG
>Marker399205	ACCATAAGCAAACCAATTAGGTGTGTTCCCCATTTTTGGTCATAATAAGCTTCATTCCTAGTTGCGATATATGTAGACAACCATTGTATCCTATTTATTTXXXXXXXXXXGGTAAGGTAAGCAGGAAGGCAAGTAACTCTTAAATGGAAGAAATCCCTTCATCATCTTTGGATGAGAATAAGTGCCTACTTGAGGAGTTCCAACATCTTT
>Marker42176	TGGATACTCTAAGATACATAATGCAAGAAGTCTATAACATATACACTAGCTTGTATCAATCAAGATATGAGCTTATGACTAGAATCTAGAAAAAAACATTXXXXXXXXXXTACCATCTTACCATGCCCTTGAGATTCATCCCTTGAGCAAATTTATTACAAGAAATCTTGCATCTCTCATCAAGGATTGCATTATCAATTTCCTAAAGAT
>Marker354528	TTAAGATCTGTGTGTCTTGAGGACTTGGAACTTGGTGTGCCTGAGAAGTGAGTGCACTGTAAGGGGTAGCCCATGCCCCAAGTTCTTGGAGCTATCCACTXXXXXXXXXXCACTTGTAAGCATGGACACGACATTCCCTAATAAGACCTATGAGAATGATACTTATGGCACCAATAAAATGTGTGATAGACTTGAGTGGTTGTATAGAAA
>Marker354631	TATACCAATTTGCATTAACACCCATTTTGGCATTGAACGAGCTTATCGACCATTTTGGTCTTGAACAAGCTTAGACATTCTGCCAGGGTTTATACACATTXXXXXXXXXXGGGAAAAGGCCATAGCAACCGAACACGAGTCTTATGAAAAATAAGACTTGGGATCTCACAGATCTTCCACAAAGGAAGAAACCCATTGGTTGCAAATGGG
>Marker233035	TTGTTTTTTATCAATGTTCCTCTGAGTTTCCAGGATGGGAGGACATGGGACCCGATTTTAGGAATGGAAAAAAATTTCCCAAATTTTGGGGACAAGGGAGXXXXXXXXXXGCTCCAAGTCCCCAAGTCCCTAGGACATCAACCCCTAGGGACACATCCCCATGGAATGCTCGTTTTTATGTTCCCTACATCTTATATATGAAGTATTAAG
>Marker379953	TTTGATCGTTTCTTCCCTTTTTAATTGCTTTGGTGCAGCTGTAGCCCACCTTAAAATAAGGTGTTGCTTCAGGGGTGTAGTGTCATTTGCTTTCTGGACAXXXXXXXXXXAATAATGTTATGCGAAACAGTCGCAGGAGTGACAGCCCAGCGTCAGATGATGGTCATGGGCCAAGGGACAGCGCTAGTCCTGAGAGGGACAGTCCTGGAA
>Marker114949	AGAGTTTACACTTGTATGGATTCCAATCTTGGCTTTAACTTCTTTAATTGGGCTTGATACAAGGCTACCTTCCCCAATACTATTTCAAGGCCACTATGTTXXXXXXXXXXGATGCACATGTAACAACATGCCCCAAACTATGGCTTATTTGAGTAAGATTAGTTGTGATCATTGGCAAGACTAGGGGTCATCTCTATTCAAATTCAAATA
>Marker136043	CCAAAATTATGAGATATAAATTTAGGGATATGGGAAACATGTAAAAACATAATTATTCACCTCTGCATCATGGTTAGACACTAGACTGATCACCACATCAXXXXXXXXXXTCTCTCCCCCTTTGACATCAAGGACAAAGGGTCTAATGTGTTCTATTTATACCATCCCAAAATTGTATAAACTCCCCCTTACTATATGATTTATATAAAT
>Marker29985	TTGATAAGTAATGGCATCTATTTGTTCAATCCTCCCAAGACTTATATGTCAATTAAGGTGATCCATTTCCCACTTTCTTGTCAATCCCAAAATGTTTTCAXXXXXXXXXXGACCATCTAACATTCTTCTACCCAATCATATAAAATTCCAATAACAGTGCCCATGTCTATATTCTTTTCATGTTGAATGAAATACATGTATTAAAAACAA
>Marker142792	TTACTTATGTGTGAAATTCATTAATCATTGTGGGTTTTTACTACATATTCTACAAAGAGTTGTTTAGTATATATCACATTAGCATACATAATCATTAACAXXXXXXXXXXCCATGTGTGGCTACGGACTGTGAATGACTCCTAGAGACACTTCACAACTATTGACCCCTGAGCTCACCTCTCAGACCCAACACCTCACCATGCAACTCCA
>Marker261181	ATACTACTACCATCAATGACTCCCTACATCTAAGCCACCTACTGCTATAGCTGAGTAACCTGGCCTTCAACTCTTTGTAGTCTGACCTCTGTCCCTTGTCXXXXXXXXXXTCATCCCCCTTGATGCTGCTGTGTTTGCCATCGAGTAGATGGAACTAGATCAGGACCTGTATCTGAGGGCCCTGCACCTGATGCCCCCACTTGTCCCAAT
>Marker311954	ACTTTGTAGGAGGCAAACATCCTAGTATGTAGGTTATTGTGCCTTCTATATTGTTATCATGTATTGCTTGTAACTGAAATAACCTCAAGGGATTCAACATXXXXXXXXXXCTGATGTTGTCATGAATTGAGCTTCTCTATTTAAAATATGAGATTCATATCTTGTCGTCTCAGTTTTCTACATATTGTTGGATATTATAGTGCAAAGGAA
>Marker389046	AATGCTCAACAATATACATAATGTTAAGTTTATTATCAATTGGATCAACAACAACATCCACATCAAGAGTAGATGATCCATCATCTAAAATGGTTGATTGXXXXXXXXXXAAACTTGTTAATTTCATATGGCTGATCAACAAGTGAAGACTCAACTTGACTATTTTTTAAAATACCCCCCGACACAAATTTGATACGTTTAGAATTTTCT
>Marker196729	GTATAACTCTAGAATTTTACCACAAACATGTAGAATGGGCTACACATTGACTCAAACACAAGTATACTTGATTCTCACCACTAGACAACATTCCTACATGXXXXXXXXXXCAAACTTACAAGTCACAACAATGAAATGGTGGAGAATTCCCACACGATACACCATAGACCTTCACAATGGTTACTATAAACTTTCCAAATATTCACCTTT
>Marker203873	TTGAGTCCTAAAAATAAGGAATTGACTTCTCCTAAGGTGGTCACAATTAAAATTCTAACTGCCAACCCTCTCATCTCTTGACCTTGGACAAGGTGATTTAXXXXXXXXXXTATTGTTTGTGTGTTGTTGACCTTCTACCTTTTACTTTCTTTATTGTTGTTTCTATCTTGATGCCCACCACTTCTTGAAAAGTTTGGCTTTTTAGTTATT
>Marker324419	TTCTGTTTCACAAATCATACGAATTTAATGGAATTTTGCACGAATTTTTAGGGTTTTTAAAATATTCGCCAAATTTTAAAAAGAAAGAATTAAATGTGGCXXXXXXXXXXTTTATCTTGAGGAATAAACATTGCCTACAGAACTATCTCATAGATTTATAACACACAGTAACAAAGACAGAAGATTATATTTCTTAAACACAAAAAAAGA
>Marker106449	ATTTTTTTTTGTTTTGTTGTTAGTTCTCTTGGTTGTCCTTTGTCTTTTTGATGAGCTTTTAATGCTTTATCTCTCTTTCTATACAAGGGTCTGGGCCCTTXXXXXXXXXXGAAACAACCCGTAATAGCTTATTATAATGCCTTATTCACAGTGCTACAAAATATAATCACACTTAAAAACTAGCAGGTTCCTCTTTGAGGGTAGTAATTT
>Marker155713	GAAATAGAGAAACCCTTTGTAACTCTTTTTTTCTGAGTTTATTTTGCCAGTGAGGCATATTTTCAGTAACCAGTGAGGTTTTTTCCAGTGAGGCATATGAXXXXXXXXXXCCTATGTTATGTGTTGTTCCTATATGTCTCTTGTGCTTTGTGAATGCTTTCATGTCCTAATGCAATTGTCTTGTGTTTCATGATCATGTTATATTATTTT
>Marker324572	ACTTTTTTTCACAATAATTCAGTGAATACAAATCTGATTACAACATCAAAAAACAACTCTATGATCATTCATATTCTTCAACAAATAGTGAAACATATTGXXXXXXXXXXATGCGAGCACTTTATGTCCAACAACAAAGCCAAACATGATCTCTGATGATACATTATTTACAAGATGGGACCATTCCCTTCACAGGTGTGATCATAATAG
>Marker306698	TTGGTCAACATGCATCCCTAGGCTTAGGTTTTGAGTCTAGTATCTAGAATTGTGGATCTATAGTTTTGGGAACCAAAAAAACTTTGGTTCCATGATCCATXXXXXXXXXXACAATGTTGTATTGGGATAGGATTGATATGAATTCTACAATGGAATATTGTTTTTTTAGGTGATCACAATAATATGATTGGGATTTGTCTCTTAACATAG
>Marker129061	CTCTGAGGATCCTTCCATTTTCATTCTAGCTTTTTAAGACAGAGGTCTCTTACTGTCTTGGTATAGTTTGGGATATCCTTGATAGCTTGAGTGAGGGGAAXXXXXXXXXXCACCTCTACCCCATAAGTGGGGTATTGAATAGCCTCGTTAGTGTATGCCTACTGGATAGGCTTGTTATTGGGGATAGGTGTAGGTTGGATAAGCAGTTGT
>Marker544129	CACAATAAAATAGATTGTAGAGAACACGGCAATTGTCCAGAATCGTCCCCAGTATGAATCCGCCAAAAAAGCCCCCAGTAAGGGTGTTATGTAGCATGTTXXXXXXXXXXAATCTGGGATTAGTTCATATTGGTTGCAGATTTTTAAAGTTTGAATTTTAATGACATGTGCCTTGAAATTTTCGGGGATAAGATTATTCATTATAGTATC
>Marker355369	AGAGTAAGGGCACTAGTTTATTAACCCACAACAAAATCTTACCAGATTCTTAGATTTATTAAACATAGTGCTAGAGTTTCCAAATCCATTGAATCCAAGTXXXXXXXXXXCATCTATGGACTAGAGTAGGGACACTAGTTTACTAACCCAAGGAAAATGTGGCAATACTAGGATAGGGGTGTTGGTTTACTAACCTAGGGAAAATGTGTT
>Marker138563	TAGGTCATTCATTTTACTGCTTTCTTTGCTTAAAATCCCGAGGACTCAAGACCAACACGTATGTTCTTTTCTCACGTCAAAGGGTGATCTTGAAAATCAAXXXXXXXXXXGGCCTCTCATACCTTGCGTATATCGAGGACACCCTAGAAGCCATTATAAACCTATATAAGACCATCAACCATTTCATAGTGTGATGCAAGGGATGCGAAC
>Marker207401	AATTGAGTTTTGCTATGTGATTGTTTGTTAGGTTGTATAGTTGGATAATCCTTTATTGGATCCTTTATCCATGACTACATCATATAGTATCAAAGTGAAAXXXXXXXXXXTAATGAAGATCTAATCGGATGTTGTAGAATAAGATAGAAGAAGAGATCATAACCCTAGAGATGATGAAATTGATAATGAAGAAATTAAAAGAAGGGAAAA
>Marker292806	TTAAAGATATGATATCAAATAATAGAGCATGCTTAATAATCCATCTTCATACTAAAAAAATCATATGAAATATAGAAATGACCATTATAATGCATGCAATXXXXXXXXXXGCACATGGAAGAGAAGAATGATAAACCCTTTGAATATCAAACGACCATGTATTTATAATGTTCCAATTTTTTGGCCCTTTAGTTACCTGTAGAAAATCGA
>Marker239618	TTGTTTGGGCATTAGGAAATATAGCTAGTGATAATTCTAAGTTTAGAGATCTAGTCCTCAGTCATGGTGCCCTTATGCCACTCTTGGCCCATCTGAATGAXXXXXXXXXXCATTCAAGACACATGGATGCAAGGTTATGCTCCTATGCTTAACTATCGATAAAGAAGCAACACAACTTCGTAGCTTCATTCCTAGCACATAGGATTAAGG
>Marker222299	CTAGTTGGTGTCCTATCCTCTAGTTGTCACATGTGATAAGAATGGGACACTTGTCACATGACTACAACTCCTTGATTGTTATCCTTGCCTTTATAAGAAAXXXXXXXXXXTATGTATATAATGATTGTCAAATCACTGAATTTTGTCATTGGAAAATTTTTGGCAAATTTTTTTTGCTCTTGGTTAGGGCTTTGGAGAAATGTATACACA
>Marker112605	TATTTGGATGCATTGGAACAGTTAGTTTGGTTGCATCAGGAGTAGAATGAAAGTTACAACCCTTTGCAACTTTATACTACCTCCTTACGATTTTTGGGGTXXXXXXXXXXACACATACTTTAATATTCACATATTCTCAATGGACCCTATATGATGTTTTTTGGATTTTGTTTCATACCTTATTTTAGCAAATTATGTCGTTTACTATGA
>Marker185851	GTTTGATGCCATTGGACTACAAATTGTCACTTTATGATCTAAAATGATGTTTTGATATTAGAGTTGGCTTTGTGATGCTATGATAGATAATAAACTAAAAXXXXXXXXXXCAACATCCATGCCTATTTTAATTTTGAATTATAAAAAGGTAGGGGTCATTTTCATGCCACAAAATCAAATTAGTGTAAAATTGAACTTAGCTGGCAAATG
>Marker347966	TAATCCCTCCACATTTAGTTTCTTAAGATAGCACTAATTTACATGCTTTATCATTCCCAATTGTCATTTAATTGACTAGGTTAATTGTGACTGATTTGCTXXXXXXXXXXCATCCTAGGACTTGCATAACTTTATTTAACAGAGCCTATGATTCTAAATACCTAAGTCAATGCATCGCCCTTATATAAAATCATCATATACATAATGAAG
>Marker54210	TTTATTTATTAGCCTATATTATTTATCTAAAGCATAAATACAATATATTTATTTCTTTACAACTTTATATTCAACAATAAAATAGAGAACTTATGATCAAXXXXXXXXXXATGGGACGTTGCAAGAAAAATGTATTTAAAAAAAAAAATTCAAAAGAAAATTCATAATTCAAGTTACTGTAACGTTGAAAATTGTCCTCTTGTATGCAAT
>Marker192574	GAGCATGCAAGATGTGCAATGATATTCATGATGTAGAGCCATCCTCCCAAAGCACCAAAATCATTCATATATGTATGTAAACCTCAAAATGCGGAGGGAGXXXXXXXXXXCACCATGAGAGAAATGTTCCTGAACATTTCAAGGATAAAGACCCATTCAAAACCTAAAATCATCAAATAACTCCTTCAAGTTCATCCATTAGTTAAGAAA
>Marker436653	AATGGACCATAGTGTTTGTGATCGACATATTTGCTGGGAGGTTTATCTTAACCTTTTAGGAAGTGATTATGTGGTTTGATGTATTATAATTTATAGCTTTXXXXXXXXXXGATGTATTAATCCTATTAAAGAAATTGTTCAATGGGCACAGAACTTTGAGGCAAAGGTGCTTGTTGATGCTTGCCAGAGTGTCCCACACATGGCAGTTGA
>Marker78548	GAGGCAGAGACTTGGTTGATCAATCTCAATCGATGCTTTTCTATGCATCCTTATAGTAGCAATACTAGAGATCAATGTGCCATTATGCATATACATTGTGXXXXXXXXXXGTTTGAGCTGAAGACCTTAGAGATCGCTGTGGAGAAGGCAAGGTTGATAGAGGAGAACCTGGCTAGAGGCTTTGGTGGTCAGGAAAGTGTTCAAATTTAT
>Marker137991	CTTCTCTATTAGCAAATCCTTAAAATAATAAATTTTCTTTTCTTTTAAATATTACATTCTAATATAGTCATATATACCTAAAAATAAAAAATTTAAAAACXXXXXXXXXXGCTAGGGTCACGTCCCATGACTAGTAAGAGTGACGCCTCATTTAAACACATACAAATACGAGAGGCAATTGACCCGGTTGAAAGCAAAAAAAGTAGAAAG
>Marker429965	TTGGGGCTTGTTATGCAAGGATTGAAGTTCAAGACTTCCTTGCACCTAAGTCAAGCCCTAAGGATAAGTTAGCAATAAAAGTAAAAGTGGCTATGGATTTXXXXXXXXXXTGATCACAACCACAATCTTGTCCATGGGATGGAATTGTCGGTGTAATCCATTCTAGGGTAGAGAAAGGTTTTTGAAGTGTAGAAGATGTGTTTTGAGTAG
>Marker299164	AATGTTGTGAACATGTATTGGTGCATTTGTGTTAATTTATTAGGTTGGTATTTTACATGTATTGGTTCTTTTTAAAATTTTAATTGGGGGTCAAGTGCACXXXXXXXXXXAAGATAAAATGAGTGGAGTCCATGACAGATCCTTCCTGACACACTAAAACCATCAAAGCATGGCACGGATGTCTGTATCATGAGTAGCCACACATAACGA
>Marker104361	CACAAGGGATCCATACTATGCGGACCCTGAACTAAATTTTTTTTCAAAAAATTACAAAAATTTCCTGTCATAGAAATATAGCAAATTTAGTGTCATTTTTXXXXXXXXXXATTGACCTATCTCCATTGTTCTTCTCAACCTCGCATAGGCATGCAAGATTTTGAAGGTTGATTATGGAGGAATGTTGGGTGATCATTCCTGCAGCATAAC
>Marker400838	CCTATTAATCAAGTTATTTATGCAAACTTGACGTGTCCCAAAGCAATATCCCATAGTCTTGGCTTATTCCTAAATAAGCATCTAAACAAGTTTTTGAGGCXXXXXXXXXXGCAACAACAAAGATAGAGTCATTACCTCTTTTAGTTCTTAGCAACCTAAGAATGAAATCCATACTAACATGATGCAGAGCTATAAGACCATCAGACCTGT
>Marker511189	CTTTATAGGTAATCATTGAATTGATCTTTAGGCCAAATAGTCTCAATCTCTAATTTGGTTTTCTCATAGATTCTCTACTACTCTCATTTTACCAAATCTCXXXXXXXXXXAAGACTTTTTGCAAGACCTAGTCTACATAATGAAATTAGATAAAAATAGATTTTAGTGAACTATGCCAGACAATGCAGGGTCTATGGGGCAACAAAATTA
>Marker275347	AGGCCGCCAACTTCCGAAAGTCCAGCACAAATAAAAGCAGTAAGAGAAAATAATGAGCTTTCTCCTAGAAAAAGCTTCGAGGATCAGCAAATGGCCGGAAXXXXXXXXXXTTGTCAGACAGTGGAGTTCTTGTGGGATTATAACTACATCCCCTTTATGGAATTTTGATGACGATGTCCAAAATAGTCATAGTTAACGTTCATGAAATTG
>Marker400821	CAAAGTGAACTTAGCCCCTCCAACTCCTCCACCTGCCCACACAATTTTTTTTAGCTGTATTGACACACACAAGCACCCATAACTGAAACAAAACTCAAACXXXXXXXXXXTATGGAAACAAAATATCGTTAATGGTATAGAAACAAAATAAACCGTTCTGAGAGAAGATATGGGTGCCAAGTGAGGCCCAAAATAAACTTGTAATGAGAA
>Marker117701	CCTCAACCTGTGGCTGCATCTCCTAAAAAGAATATGAAGAATGATAGGCAAAGTGAGCTCCGGTGGCCAGCAAAACACAACTAGCCATACACACTCGAACXXXXXXXXXXAGCACAACCACTTGTGCCAAGTCTTCCGCTGCTCCACTCTGATACACACATCACCAAGCCAAGAGTTGTGAAGCAACTCATCATGATCCATATGAAATAG
>Marker197415	TCAATTCTCACATAGGTGCAAACATAAAGCTTTGTCTCACTTGTGGGCCACTTTCAAATCACGAACTTGGAGGCCTTCAAAATTTTCCACCTCCATTAAAXXXXXXXXXXACAAACATAGCCCTTGGAGTAAGACTTCTAAAAGTATGGGTTTTATCATATTTTACTTAATTATTATATTCATTTTCTTTTTAATAATCAACATAGGTTT
>Marker258700	ATAATCCCTTTTAACTTGTTTTAAAGTCTAAAAAATTGGCATTCAAGTCTAAACCCTAAAATGGATGATTATAAAGTTGTCAGGACAATCCAAATTACTTXXXXXXXXXXTCTAGCATCCAAGATAGTGGCCAAACTGATGAATATAACTAATATGGACCTAGGAGATGTCAAATTAGAGGAATTTGACAAATGTATGAATGAAGACAAT
>Marker223491	ATAAAAAATGTTGCTAAGAAAATCACTCATGATTTTCTCCTCTTCACTCTACAGATCAACAACTTGATCCACACTAGAACACCCAACTTTAATATTATTAXXXXXXXXXXATACATCTACGTGCTTCTATGCTCACAAGTCACACAGGCAAGGTTCTCATCTTGAAAGTCACTGGCTGCACCATCATTTATCTATGCAACTCTATCATCT
>Marker245894	TTGAATCAAGACATTTTTAACATACATGAGAGGAGATGCTCACTAACCCCATATCCACCAAGGCTTTTAATATCCTTTTCAAACACAAAATCTACAAGGAXXXXXXXXXXAACATTTGTAGTTTAATTTTTTATTTTTTGATCAAATTAAATTTGCATTCATTCAAATTATATAATAAAATTAAAAAAATTACTTATATAAATAATTAAG
>Marker277216	TTGGATAGGGCAACTAGTGGAGGTGTCCCTAACTATTTCGCATCCCAAACTTCAAAAAATGGTCAGTTATTAATTTCTATCCTTCATCTTAGTCTGCAAGXXXXXXXXXXAGTTACTTGGATCTACTATCCAAATCCATCCTCACAAGAAAAAAACAATAATACAATATTATTTATGGGCTATAACCCAAAGGAAGCTCCAACTCTTTGA
>Marker225453	TTGATCCTATAGGTGATAGAGTCAAACTCGAGATTGATTATATATTCATCAAACACATTCCTAAATCTACTAGAAAGATTCATAATCAAGTCTACTTGAAXXXXXXXXXXTTTACAACACACGAAAACACCAAAAAGTTAGAGTATGACATTCAAATTAGGCACCCTAGACCTATCTTAAAATACAGGACACACAATGAAAATCTCTAGC
>Marker273591	TCTCCTTGTATATTGCATATACAAATGCAATATACATACAACCTCGGATCCCAACCGCCCATCAATCAGATTGGAAAAACCTATGAAATTTGGCTTGTATXXXXXXXXXXGAGGTTACTCTACACATCATATATCTCCAAATGATGTGTCTAAGTTTATATTTGCATGAGTTCTACCCTTATTTGTGATTTTCTACATGATATTTTCAAC
>Marker272411	TTTCCAATGTTAATACCTTCTTCTTTCTCTACTTGATTTCTCATTATTTCTTTGGCTGCTTCTTTAACCTCTTCCATGATATTCTTTGGCACCAAGTTCTXXXXXXXXXXCATTTATTCTTTGACCTTGATAAACCCTTGTATTTTCTTATGTTGGGTTTGTTCTGTAACTATGGGTGTCTCCAAAGGTGTTTGTTGAGATGTCTGCACA
>Marker125636	TAGATAATGACCAGATAATCAATACTATAACTATACTAGTAGAGAAAACTCAGGAAGAACCAAATTCAAAAGGAGGGTTGGAATTAAAGGACAATGAAGGXXXXXXXXXXGAACTATTGTCCTACATAAATGAGATGGAGGAAACTATCCAAAATGAAGTAGAGAGGCTTGCTACACTACCGCATACCCTTACTTGCACTGTAGCATGCT
>Marker244728	GCCCTAGATCCTAATACATCAATTTGCTACAGCAAAAGGCAGAATGATCTCTCTCTTTTACTTTGATTGGCAAAAAGGAGACAGTCATGAGTGTGAACCAXXXXXXXXXXTAAGTTTTATGGCTAAATTACATGCTGCTCTTACATAGCAAACATTTTAAGACTCACCCATATTGAAAAATAATGGAATTATAAGAAAAAATGTAGTTTT
>Marker321087	CTCTTGAGATTCAGTGAGAATAATCTATACTAGTAATGGCTTGCATTTACCATGCAAGGTCCATGCATGTTGTCCATCTTTTCTGTGATCTTATTGCTTAXXXXXXXXXXATATGCTTTTTATGTTTAGTCTCTGAATTATGTTATCCATGTTCTTAGAAACTCTATATTTGGGCATCATAACATTTTATATTTAACCAAAAATTATTCT
>Marker278215	ATAATCTCCCTAATTCCAGGATCAAAGGCCTTTGAGTCTCCCAACCCTAGATCCTAGGACATGGAGACATGCAAACATTTTCTTGAATTTTTCCCTTTGCXXXXXXXXXXTTACTATCTACCTCTTATAGCTATTCCCACTTACCATCTACATTTTGTTTCAATTCTATCCACCCACTTTCACACATATATGAAAGGTAAATAACTATAA
>Marker63936	TATAGACTTGTGAGAGATAAGATCAAAGGTATAGAATGAATGAGAGGATCAATGGTAGAGAAGAGTTGAGAGGATGTGCACAAATAGGAAGAGAAAACGTXXXXXXXXXXTTGATTTATTTAAATTTGGAGAAGATATTATTAGAAGAAACAATTAAATAATTGGTTTTATTTAATTTAGAATGATTTTGGAAGAACTAATTAAATAATT
>Marker157951	AGGGAGCGCATGGGCCATATTACCATGAGATAGCGGTTCGAGCCTTTTAGCAATGTGAAGCAATTCCCTACCCCAAAATAATGGACTCAACCTTCAAAGCXXXXXXXXXXGGCTACCTGATTGCACAGGAAATTCTAATTTTTAAAATCTGGTCGTTAGATTTTTTTTTTTTCCATCATACACATTTCATTCAATGGATCATACCATAAC
>Marker57178	ACAATCTAGGGGACTATTTCAGACCATAAAGAGACCTCTTCAATCTGCAAACCCAATGTTCTTTCCCTTTTACCTCAAAACCTATAGGCTGTTGCATATAXXXXXXXXXXGGCCTTTCTTTCTTTGGGCAAACAAACAAGAACCTAGGTGTTACAAGAGTCTAAAGCCATCATCTTCTCCTACATGGCTAACTGCCAAGACTCACTATCA
>Marker370312	ATCATTGACTCTTCTACTTCTTCACCAAAACCTTTGATGGTGTTAACAAGTTCATCTACGCAAAGAAAATATGCGGCGACATTTTTTTCATCCTTCATCTXXXXXXXXXXATACCCATTTACTACGGATTGCAATATATTGAACCCTAGAGCCATTAAATAGGTTCTCATCCTTATGCTCCAAAAAGCATAGTTTGTTCCATTGAACAAT
>Marker93096	CCACTATAAATGATGATAATACTATTGAAAATGAAACTACTAATGCTTGTAATCAACCATTTTCTGCAGGTAGTGATGATGAAGAAGATGACATTTCAGCXXXXXXXXXXAAAATTTAAATATGCTTTGGACCTTTTAGAAAAGTTTAACATGTTTGAATGCAAGCTAACATCTACCCCATTTTAATCTGGAGTCAAGCTTACTAAAGAA
>Marker553147	TAGGGATATGATATTATAATGTATTTAGGTGGATGGATATGCCCACATGTGGCACACATCTATTAAGTTAGTTATATTAGGTGTTTAGAGGTAAAAAGAGXXXXXXXXXXCTTTCAAGACAAGGTGAAGGAGAGAGAACATTAACTCATTGTTTTTTGAAGTTTAGAAAGTGGAAAAGTTAGGGACACCTGAACTAGTGCCCTAGTCCAA
>Marker163608	CTTGAGGGTCAATAGCCCTAAGACTCCTTATGAGCTATGGTAAGGAAGACCTCCCACTGTTAGATACTCCAAGATCTTTGGCTGCAAATACTACATCACAXXXXXXXXXXGAGAAGCAATGAGAATCAGAGTAGATCCCTAAGACTCTAGCAAAGTATGTTCAAAGGAATCATTCAGAAGATAAGATCATTGGGGATAATAATGAAGGTG
>Marker144665	TAGAATCAACAAATTAACAAAAGAGATAATGAAAGTCACAAGTTCAGACCAAACTGGATAGGTCTGTGTGTAGTTAAGGAAGATGTTGAAAATAATGCCTXXXXXXXXXXTTTCCCCTCTACACTTTTAGCAAGTTCAAATGAAGTCATTCCTTTAGCTTTATATTGATCCTGCTCTTAATAAATCATGTTGTCAAGTCTAAGCATAGCA
>Marker254862	CAAAATTGTGATGTTTTTGACACAAGACCCATTATTGAACAAATAATAAACATATTTATTTGATCTATGAACCATAACTAAAATTAAACACTTAAGAGAAXXXXXXXXXXAGTAGGCCACCCAACTCAAATCCATTTTGTGATCTATAGATTGTTCAAAACAAGACTCCTAATGGTGTCTGGAACACCCAAAATTTTGTAAATATAGGAG
>Marker233467	TTGATTTCAATGTCGGAGTTTGTATCTACTTCATCTTATCTTATGCTTTCATAGGTCCGGGAAGCTTTTGTTTTCTTCCTTTTTCTCACATTTTTTGGATXXXXXXXXXXTCTTCTATTGGTTTCAGGTTCTCTGAGCTCAGTATGTAACTTTAAACTCAACTCCTCATAAGTTCCAAATCTTTCAACCATTGTGTCTTTGGGCTTGCTT
>Marker156623	GTCTACAAGTGCATTAAATTTCAAGAACATTGTTGTGTAGGTTTAATACATTGGGTTTGTTGATTTTTCATGGTGTTTTGTGCATGAAAACTAATTAAACXXXXXXXXXXTGAGTTCACCATAGAAAGTTAGGGTTTGGTAAGACTCTACAGGGTGTGTGGAAGGTAACAAGAATCCAAGGAAGCATGAAGAGTGCATTTTTCCATACTA
>Marker459383	AAAAAGTTGAAGCACTCTCATTATTAATGATTTGTGGTGTAATATTTGTGATGGAGACACCCAACCTGCAACACCAATTGTTGTTAAAGAAAATTAAGTAXXXXXXXXXXAATGGTAGACTGCAAGTAGATCTGGATCAATGCCAACAATGACGGATAATGAAATGCAATCATTTGTCAGCTACATTATCCAATTGATGATTACAATGAA
>Marker92564	GAGCACTATTTGAAGTGAAAATCTTGTGATATTAACTTCTCTCAGGCACAAAATTTTCATATATAACAATGATTGACAGCTGGCCCTAACCATATGGTTAXXXXXXXXXXGTGAACAGTCCAGACCGTGCAGCAAGAGTAAACACAACGGAAATAACTCAAAGATAGAATGCAAATGCAGATTCAGTCATTCAGTATATCATTGATTCAA
>Marker138315	TTACATACATCAACATAATCCAATTCTCAACTAGGTCGAGGACTTTTCCCCTAGTCAAAATAAAGGATTGATTTATTATGGATGAACATGTGGATTGAATXXXXXXXXXXTGACGTAGTTCGACAATGATACTAATGATAGGGATGAAGGATTGAATTGATAACCTGATGGGACAAGGCGATAAGGGCGAGCGAATAAAAAGCCATGATA
>Marker209377	TCCTCATTTCCTAGGTCTATTCCCCATGGCGTTAGTCTTTCATGTGACATCAAGTGATCTATCTATGGAGGTTGCAAAAAGTTTCTCCTTGTGTAGTGGGXXXXXXXXXXGAGTTATGATGGCCCATGCTTTGGTTTCCTCCATGATGGCCACATGTGCTTTGCTATAGTTGTGTGTGTTTTGTGGTGAGGATTTTGTGCTTATGGTGGC
>Marker271149	ATAATACCAATTATTTTTTAAAAATAAATTAGATTTAAAAAACTTTTAACAAAATGTAAAAAATTGCAAATTTTTAATAATTTTTTTGAAATGCATGCAGXXXXXXXXXXGCCTTCAATGTCCAATTAGGACGAAATGAAAGGTTGATTTTACTTTTTTTGGCTACTCTAAACTTAATGGTGAACTCAAAATGTCTCCAAGAAGCTCCAA
>Marker204976	AATCAAGACTGAGTATCTACTTGAGGAAGGAGATTTGCAAGTTATTGGAGAATATTGCAACGTGACTAACCCTAGAAACATTTAGAGAATTGAATTCAAGXXXXXXXXXXAAGAAGTTAGGGAGAGATTTGGAGAGAGAAGGAAGATGCTAGCTCCATAGAAATAATAGGGTATTTGGAAACTAATTGAATGGGTGGATGAATCAAATGA
>Marker354322	AAGGAGACTCGGGGCGCAATTTGACCCTAGCCAAATCCTCTGATGGTGGGCGCTTTAAACTTTACATTTCCAATCAATCCTTGAAAGCGCTCCACATCCTXXXXXXXXXXCATCTACAGGAATCCAAGGGAAAGCGCTCAAACCGACTAGGTTCTTCCAAAGGCGCTCCATCCCAGTCCAGTCCTTCTTGAAGGCGCTAAAGCATTCCAA
>Marker248084	CAATTTGATGATGGTTGATTGGAATGTCCTTTGGGTAGAGTTCTTAAACAAACTCTTTACCATTGATATGGAGGGCTAGGATTTAGAGATGCCCTGAAGGXXXXXXXXXXGGAGCACTGCACATGTGGAACTTGGTTTCTAGACCTTTACTAGGCTGATAGGGTTACAAAGTTCACTATTCATGACTTGTGCTAGAGGTTTCTAGAAGTT
>Marker341308	AACATTTTTGTTGAGTGTGAAGGTCTCATTTTTGGTTTGAGGTTAGCCTTGAGAAAGAAAGTCAAGATAATTTAAGTGTTTGGTAACTCTGAGTTAGTCAXXXXXXXXXXATATACTAGATTTTATGGCTGGCCCAAAGGTTTTTGAGGTGTATGTAATTGATAGGGATGAATTCTTATAGGCCCAATATGTTGAGATGGATAACGATTA
>Marker293303	ACTTAAAAGGTATCTTTTGACAACTTAAAATAATTTTTTCAAGGCATTGACATGCAATTAAAGTGCCAAATAAAAAAATCACAACCCAAAGGGTCTTGCAXXXXXXXXXXTGTTATTTTGGGATTGTTGACTTACTACTTTTAGTAAATTGTTATTTTTAGATTTTTTTTGAAAAAGGGACATGACAAGTCCTCCACCCTCAAGATTGCT
>Marker261603	GATCATACATAATTGTGGATTTCTTGGTGAAGTATGGTTTGGTTTTTTCTTTATTTCATGACTGTGTTAGAATATACATGTGGACCATTGGTAAAACTTAXXXXXXXXXXAGATAGTTTCAGAAGAACTAATCAACATTGTGTTTAATTCATGCTTATATGTTTAAATATTGTAAGATTTGGTGTAATTGTTAAGAATATATGCAAATCA
>Marker342462	TTTGATGTTGAAATCATATTTGATGATTTGTAATGTTATGACATCATCTTCTTTAACAATAAGGAACTAACCACTTCTTCAAGTTTCAAGTTGGAACTAAXXXXXXXXXXCAAGATCCCTAACTTTGTTTAGAATTTCTTGGTGGTAGTTTCTCCCCATACATTTAGAAGCACTAACTTTAAAAGGAAACAATAAATTAATTCTAGCCTT
>Marker116045	ATCACCATTGTCTCCAACATTTCCATTTCTAGACTGCAAAAAATAGTGAGTTAAGGTTCTTTGCCCTTTGTCTAATTCCAGTAACATTTGTCGTAATTTGXXXXXXXXXXGATGTATAGGGAAGAGTCCTTGATGGTATCCTCTCTAGAGATATCTGCGGGAAAAGCTTTTGCTACCTTGTTGAGAATAAACTCAATGTTCAAGGCTCGT
>Marker307379	AGACCTAAAACATTAGTGTGCGTAGACATGTTTTCTAATCACTTAGAACTTAGTGCAAGTTTGATACCTAAAGAACTTAAGACTACAATACTTGATCAGGXXXXXXXXXXTTATTTTTTAGTTTGATAAATCAACCCCTAAGACTAATAGTGTTGATAGACTACATGCAAATGTTCAATTTGAGGAAAATGAACACGACTCTTTGTCTGG
>Marker402615	TCCAAAAGGTATGCTTCTGTTGAAGGTCCTCTGTTTGAATAATTTTATGGATACATTTCTATCATTTGATCATAAATATTCATGCAATCATGTAGGTGTTXXXXXXXXXXGGAACATAAAGAATCATGTGTGGTGTGTGAGTAGTCACATGTAGAACATGAGGAGTTGTGTGTGGGGCATGAAGAGTCACATGTAGTGCATGAGGAGACA
>Marker248463	TCCCTTATGAGTGATTTACAAACAATATTAAGAATAATAATTACAAGGATTTACAAGGTTAATGGCATCTTAATCCTAACACTTGCAATAAATGTGGTTAXXXXXXXXXXATGAGGAAGAGTGGATTTTATTTTATCCTTGGAGATGTGGTTTGGGAGGAAAGGGTGAGTTGGCATGTGATGGGGGATTTAGGAGGGGAGGGATATTGGT
>Marker115045	GGAACTGCCCCCAGATCCCTCTGAATCCTTTGGTGGCATTTCTCATACCCTCTTTGCAAGAATTTGCTCCATTTCTTTAAAGGACCATGGACTCATAGAGXXXXXXXXXXTCTCGTGGCCTGTGCCTTCCTGGCACCTACTCATTGCAAGTGTCATGTCAAACGCGTCACAGATGTAGGTATTTTGATTTTGTTCTTTATGACAACTCAG
>Marker197773	TTAAATCGGGCCTTGTAGTAGTCAAATACATCAAGCTTCCAACCATGCTTTTGTATAGGGTTGGGTTTACTTCATTGTTGTTGTTGTCCCCCTTGCTTAAXXXXXXXXXXACAATAATCAAAATCTCACCATGAGCTGCTTTGATAAAGAGTGTGGGCTCACTGTTGCTTTTGCTAAAGCCATTTCTCAGTAGATATGAATCTATTTTGT
>Marker302131	AAGTTAACCTTTTGTTATGAAGTGTTTTGTTCTTTATGGGTATCTCTTGATCCTTGTAAAGATGACAGAGGAGGGACCTCAACAAAGACTCCCTTACCTCXXXXXXXXXXTTTTAGACATTTGTGAATTGTTGAGGGGATAGTTTTCATGGCCTCAATCCATGAATGGCCTAGTTTTATGTTGGTATGCGGTGACTAATCACGTAAATAA
>Marker417267	TAAGAATGGTAGTGCCAATGGTCCTTGGACAAGAAAATATTAGTGCTAACTAAGAATTTTGGAGGGATACAACTTCAACTGCCACAAATCCATTTTTCTCXXXXXXXXXXTTATTAGTTAGTTGTTTTATTTTCTATCATCTTTGCAAGTAGAGATAAATGTTCATTTTAGTTTTTTATCTTTCTAGTGGAATGAGAATTAGTAGACTTG
>Marker129828	TGAGTTACTCTGCTCATGAAGCTGACCTGAAGAAGTTTACTTGGTGCAGAGCATTCCAAATGTTGGAAGGTTATCTAAGGAGGTTCTATAGGTCATCCTGXXXXXXXXXXTAAATGAAGCAGATATATAAACAGAGATTTTTTATGCCGAATGAATACATGAATGATATGATGTGATGTTGTGCGAAGGAATGATGTATGTGATGCGATA
>Marker197897	TACAACTACCACATCTGACAAAAATTCCCCTTCCATTATGTTTTGATAGATGTCCATACCTGGCTCGAAAGCACCCATTTTGGCACAGGTAGGGAGGATGXXXXXXXXXXCCAAATCCTCATCCAAAGCTTCAATTTGTGCATGGGCATGGAGGATGCTGGCGAAGGTTGAGGAGTTGGGCTTTACACTTGCCAGTTGGAAATCTGACAC
>Marker189576	TTTCAGAATTGGCACAAAATGATTATGTATGCGGTTGACAATTTGGGTTATGATGTTTGATCCATGATTATAGGTGGTGGTGTGGTTCAGTTTAGGAGATXXXXXXXXXXTGTGATTGATTTAGTGTTGATGCAGACTTTGTTAGTTGGCCTTGTCTATGGTCATTTATGCATTGGTATGTTGCATTGGGATGAGAGGATGGATGATCAA
>Marker651569	TAAATTCTTATATGATCAGGCATTTAAAGCAAAAATTCTAAAAGTGCCTAGGAGTCATGGAGATGTGTCTCAGGCGTCCCCTAAACACACCAGACACATCXXXXXXXXXXACGTGTTATCAGTTTTATGCTGTAATAGATACAAATTTTCAGTTGATATTTCAGCCACAGTTTTACAACCTTCAGAGAACTCGCCAAACTTGAGATGATG
>Marker228047	TAAATTTTTCCAGAAATAAAAAATAGTTTATGTAAACAAAAATACTTAAATCTTTCAATAAGCTACAAAATGACACATAACAAACCCTTCAAGTATCATGXXXXXXXXXXCTCCTCTAGGTTCCAAAAAGAATTTTCCAAAGTTCCATGGTGATGGCTCTTAGCACTCAGACAAACACATCTCAGCTTTCACCACAGCTTGCAGCATGTT
>Marker81013	AATTGTAGGAAGTGATCAAAATCAACATATCTTTTCTATAAACAATGAGATATAGCAAAAGGATCGGGATTTGTGATTCACAATTTGCACATCATCACAAXXXXXXXXXXTTTGGTGGACTGTTCTACTCTCCTTGCCTGCTTCCTTGTGTCTTGCAGTGTCCCCTGCTACCTTGTTGTGACTTCCTGTCACTCGCCCTTGCTTCTTGTT
>Marker454582	AGGAGAGAGAATACAACATAACTTGACCTCAAACACGACATACAATGTTCATTAACCTTATAAAATGAAATGTTCCTAAGTGCAAAATAGATGGATCCTTXXXXXXXXXXATAGTGCAAATCCACTAAACCATAAATGCATTGAAACATAGTGTGTATCCACTGAAATAGAGATAGAGGAAAAGTATACCAGACAGGACCATTGAAATAG
>Marker417226	ACAACAACTGTCTTTCTAACAAAACCCTCAAGTGGACATTATTCCTCACAAAGGACAATCCACAAGATTCTTGGAGCTAGTTACTACTATCCATCTTCTCXXXXXXXXXXCTTTATAATAAAATCTTCTTAACGTTTGGAGCCCCAAGATCAATAGTTTCAAATAGAGGGCCCCAATTCACTTCTCAGGTAATTCAAGCCTTCACAGATC
>Marker533368	CCAGCCCAAACCCACCTTCAAAAAGAAGATACTCACTGGAAAAATTGTTTGTAGCTGCTTTGATTTCTGAATAATCAAATGGTTTGGGCTTTCCTCCAAAXXXXXXXXXXAATACACAAAACATACAATATGCATGGTTTAAAGCAACATACTTTGATCATCTTTCGCTGTATTAATGCACACAGAGAGGAAATCATGTTGAGAGTTGAG
>Marker165007	GAATCATGGATATCGGGCCCCATCGTGGCAAAGAAGTGCCAATGCTATTCAGGGACCAGGAAGCCACAATTACAATGGACTCTTCTGACGAGGACGAGGTXXXXXXXXXXGACACCCAAGGAATCAAAAGAAGGAAGGAAACAATGTTGGAAAACTAGGAAAATTGATAGATACACGTGTAACATCAGAAATTGTCCTCCTGCATGGTAT
>Marker474346	TAGAACTCTGTAAAGTTAGAGAACATGTTTGTGAGTTATATACATGTAATTGGCATGCTTGGAAGGCATCTAGAGTTGGGTTTTCAGTAGTTATAACTTAXXXXXXXXXXGTGATTTCTGTTATCTATCTCCATGTTTCACATTATATATTCATTTCCTTCATTAAAATCTGCAAAATGCACAATTCTATGAATGCATGTGCATAAGCAA
>Marker406572	CTCTTTAATGGTGGGGTTTTTTTCCTGAAAGGGTTTCTCCACATACATCCAATGTCATGTGTTCAAATCTTATGGTTTTCTAATTTATTCTTCCACACATXXXXXXXXXXTGTCTTAACAAAAACATCAATGACTTGATTTGTGTTTAATGGAGTAGTAGTGTCTAGATCTAGTTAGATCCATTATGAATATGTTCAACAACATCTAATG
>Marker454167	TGCTTTCACATAATCCTTTCATCCATCATCCATTTATCCATCCATCTCCATCCATAATCCACATCATAACCCACTATCCTCCATCCATCCATAATCCACAXXXXXXXXXXAGAAAAAAAATAAAAAAAACAATAAAAAAGAAAAAAACAAAATAGTAAAGAGAAATCATTCGTCCAATGGTGAAAACCACTCCTTGTGGTGCCTTGGATA
>Marker39706	ATCTTTTGCAGATTAATACAAACATTGGGCCTCTTTCCTGTGTGGAGTTTTTTACCCTCAAGGGTTTTCTCCATGTTAAACATTGTTTCATTGTGTCTTGXXXXXXXXXXCCTCCCACTTATATTGCTGATCCATGCAATACATTCAAAACAAATCCTCTAGAACTTGGTTAACTCTCTCAATTTGACCATCTGTTTCATGATGATAAGC
>Marker355286	CACCTAGAATTAGCAATTGTCAATACAATGCTACAAACACAAGGTCTGTAATATCCCCAATGGGATCTGCCCTAAATTCTGATTTTTATTTTCTGATTTCXXXXXXXXXXCAGAATATCTGAATATGCAATTACATCAATAACATAGGCTCAAACATGCCCAAATGTATCTCAGAAATCTGCCCTTACAGTTCAGACCTAAAATTAGGTT
>Marker449781	TGATTGAGAATTTGAGACAAGTTGAGAATTTGACAGTCAAGGCTCAAGACAAAGTTTACACCCTGTAATTGGCAACATTAAACAATTTCTATTTTATGTCXXXXXXXXXXACTGCCAAAACATATGCCATAATTTATAACCCACAGGAATGTTATTTTTAACCTTCACCTTATCCACAGCGGGGATGTAACAGAGTGAGTAAATAGTGTT
>Marker591050	AAACACCAAAGATTAAAAGTATAAACAACAAATCCAAACCAACAAAGAGAGAAAGTCACTGAAGAGGATTTAAGAACCCCTTATTATCATCCTGTCCACTXXXXXXXXXXTGAGAAGGATTAGAGAAGTATCTGATTACAAAATGATTTAAAGGGGATGTATGACTTGTCTTCAAAACAAATGAATATATAAAAACCATAAGAAAGGAGA
>Marker509207	TCTAGGTATCCTTTAGAACATTAGTATGGTCATAGCCATCCTTGCATGTATTCCAATTATGCTAGATGTGCACCTACATTGTCATATTCACTCTAGTAACXXXXXXXXXXAGATTAATAGCACATCAAAGTTGTAACATTTTCAATGTATACTAATTATTCTTTTATAGCAAGTGTAATCAATTAAAGATGTTATGATGTTGACAAGTAA
>Marker91468	AGAGAAAAAGTAATAGCATATTTCCCATTAGTCATGGAATCAACTTCCTTCTTAACTATATGTAGATTTTACAATAATGCATAAAGGGTTGGGAAACAAGXXXXXXXXXXATGGGAAGTGAGCACTAGGAGGGGATCTACCTTGAGATGAGAAGAGGAAGGATCTATGGAAGAGGAAGGGTCGGTGGGTAAAGGGGAAGATGTCAAAGGG
>Marker321692	ATCTGTGTTATTATATTGTTTTTTTTGTGTTCGACAAAGCAATGCTGGCACCATTGATCTACAAAAAAGTATTAAGGTATTCTTATTATACAAACACAAAXXXXXXXXXXTCTCTCTGACATCCATTTTCCATTCTCAATTATTTATCTTTGTTGGTCACAATTTTCTCAAAATTAAGATAATATATTGAGGAACATTTTATTTTATTGT
>Marker541059	ACCGATGTCCCAAAAATGAATGGGATTTATAAAGAGAAATTGGGGACAAAATATTTTTATCCCCAATCACACTAATTTCATTTGATTTACATACTAAGGAXXXXXXXXXXCATTCCAAGTCCACAACATCCCTACATGATGCAATTGGATGTTTAAACCTTCCTAGCAACTCAATCCAACACTCACCTTTCACCAAAATCAGGGTTTGAT
>Marker428139	GAGAAGACATTATATGAAGATATTATGGCCATATAAAGTTCAACATGCTATGAAAGAGTCATGAGTGTGATTATACATATAAATTAGCCAATAGGCCAATXXXXXXXXXXATAAGAACCCCTACAACATAATCAACAACTCAATATGTAAACCAATAACACTTCCATTACAAATCCAATATCAATGATTATGCTAGAGATACTTACAAGA
>Marker157398	GGCTGCATTGAGCCTTGGTGCTCCTACACTAGGGATCTCTGGTTAATGTTGTTGCCCATGTCTCCTTATAGTAACTTCTCTTATGCATGTGTTCTCAGATXXXXXXXXXXTTTAATCTACGCATTTGGAAGTAGATTTAGGTGATTAAGTTTTGCATTGCATGATGTGATATTATCTTGGAAAGGGAACCACATTGGTTATGGAAATAAA
>Marker250962	AAATATGTGTTAGGTCATCTCATAAAGACTAGTAAAGAGGGTGAAAAGATGGAATTTGAAATAACTCCTTGAATTTTGGAGGTCATTTCCATGCTCTTTAXXXXXXXXXXGTTAATTTTACTATTACATTTTTCATTCACCTTGATGTGCTTGTGAATCTAACATGGGCATGCATTTCAAAGTATATGAAAATTCTCAACCAACATGAAA
>Marker622304	CTGAATTTTTAGGCCTTTCCAGAGTTTTTATCAGTGTGTTGTATTCATAATTGGAAGAATCTGCATAACTTAGCATTTGGTTTACCTAAAATAGGAAAATXXXXXXXXXXCTCTTGATGCATTTGTAATTTTGATAAAATTACCTAAGTTGATGATTTAGCATGCACACATATTTTTTGCCAGTTTGTCCCATATATCTTTTCTTCTTTT
>Marker267918	ATATATTGCTTTAACAGTGGAATTTGGACAAATTTATTAGATGCATAATCTCTAACCTGCTTAAGAAAGCCTGCACCAAATGCGCGTGTAACTTTCAGTGXXXXXXXXXXAATTTGTGATATGTTCAAATATACAAGAAAATAAGCAGCTCAAGAAGAAGAAGAAGAAGAAAAAAAAGCTTGTGATCTCGATTCTTACCTCTTCAACACT
>Marker697895	ACTATAGAATTGAAAACCTAACTCTTTTTTTGAAAATGGTAAATACTATATTAAAAAGAAAAGTGGGATTACAAAAATCATTTGCCTAATGGAACAAAAGXXXXXXXXXXATGACCATGGTGAGGCATCTGATGCTTTTTCAAAATTTGGAATAAGTGTTAGCAGACATTAAACAGGATTATGATGAATTCCAAGGGTGAAATGAGACGG
>Marker349198	ACCTAACCTATGTCTTTTGTAATATGGATAATGGCAAACATCCACAACTCTAGTGACCTAGAATCCTTATTTCCATCCATCCTATTCAACATAGTTATCAXXXXXXXXXXCGTCCCTAGTGCTCAACCTTCCTATTAACAGGATTGTATTTTTGAGAGCATTCAATCACCAACTCTAGGGTGTTAGTAGCATATGGAAACCCAATTGCAT
>Marker432360	ACAATTATTTGAGCCTCTAAGGGATTTTCTATAGAAAAACACCATTTTAAAAAATTGCAGTTAAACTCTATAAATTTTGTTTTCATAAATGTTTGGGAGCXXXXXXXXXXGTAAACCTTGAATTTCAAGTTGATATCAGAATCAGTCACTTCAAGTTTGTTTTTTCTACCAATTCCTCCCTGTTGTTTGGAAATGGAAAAATTACAAATT
>Marker187140	TTTCCACCTATCTATCTCCTATAATTGTTTCCTCTTAAACACCTACTTGCAGTCAATGGGCTTCCTTCCCTTGAGCAACTCAACTAGATCCCAAGTCTCAXXXXXXXXXXTACATTCTCTTATCCAATATATTGTTCTTTGACCCATGCATCTTCCTACTTCTTTATTTTGGTTTCAAAATGCACAAGTTTCTTTTATTTTTATTTTTGT
>Marker173852	CCTATGACAGATGAGCACGGTGATAGTGGTCTTTCCCTTGCTGAGTTTCATGCACTTCGAGAAGCAATTGGAATAATGAAACAAAATTATCTACAGTTACXXXXXXXXXXGGTTGAGGATATGGCTACATCCATCACAGATACAGGTGCAGTTGATACAGATGGGATGAGTGCATTGGTGGAGAGTTGTAGAGAACCTCTTGTCGCACCT
>Marker206099	ATTGTCATGCATTGTCAAAACTTCAACTCCATTAGCATCTATAGAGTTATGGAAGGTTCAAATCCATTAGCAACTTCAATAAATGTAGAAAAAAAGATCAXXXXXXXXXXCTCAAATCCTTATCCTTATCTTTATATGCAAGGATTCTATTATACTTTTGTATGCTCCACATTTTGATTTATTGTATAATATCACATGGGCTCTGCATTT
>Marker160242	TTTGTTGGTGCTACCAACCCCTAATGAATGACTACATCTAAGCAATTTTCTCTTTATACTCCTTATTTTTAGCCTTTTCCTTAGCTATCATAGCGAGTAAXXXXXXXXXXGGAAGAATTAAGAGTTTGAGGCTGATTTACCTCAAGTATGAGCCAATGTGGCACATCAGGTCCATACCCTTTTTGGTCAGTCTGCTCAATGTGAGCATCA
>Marker176115	TACTTATATAAATCCATGTCATTACCTCCATAATTAACCCTTGTTGGCTTACACATATATCCTACACAATTAATGCACACATCAAGCATATCATGTGAATXXXXXXXXXXTTGTATAATAATGGAAATAATGAAGTTGAAATATCATGATAACTCTAATCATTAAATATCATCATGTGTATCATAATCATTCAATCATATCAATATCCAA
>Marker444002	TTGTTACGAAGTAAAATCTTGAAGCTGTTTTCCATCTCTTTTTTAACAGCAGCGTAATAACTAACTATAAACTCCTCCTTACAATGTATTGTAACTCCTGXXXXXXXXXXATGCCAAACAGGTTGTGAGGTGAAAACTAAAAGATTGGCGGTGAACCGACCAATGTTACATTCATCAACTTGCAACCAAGACAAACATGAATTGCTATGG
>Marker365960	ATGATAAGATATGTTGTGATGTTATTCCAATGGATGTTGGTCACATTCTTTTATAAAGGCCTTGGCAATATGATAGGAATGTGATACATGATAGGAGAAAXXXXXXXXXXGGAAAATCTCACATCAAATGGATTTGATCCTAGGAGTCAGTCTACCCAACAAGGCATCCCACCAAATGGATCCAAAGATGATTGCAGTATTAAACAAACA
>Marker202475	TGGCATCGCTGATGATTTTGGCCCACTGGACCACCTGCTTATTCTCAATAACCATTCGTATAAACCCAAACATCCATGATTCAAAATTCCCAGCATTCTCXXXXXXXXXXCATCCCTGCTTCTCAACTCTTCTGGTGACCACATTGTAATTATTTGCACATTCAATCACAAGCTCTAGAGCCTTTGAAACATATGGGAAACCAGTTTCAT
>Marker208179	AGTGTCTCTTATGTCTAATCATTTTCTATTATGTTTATAACCGCTTTCACTTGCTCTTGGAATACAGGTGATTCAGAGACTTTGTTCTCCTGGTTTGGGAXXXXXXXXXXATAATTTTTGCAGCGAAAAAAATATTTACCAATAGTTTTTAGTGACTCTGATTGGGATTGAATTAAAATGTTGGTTCTTTTATTTCCCAGGAAATTTGAA
>Marker593693	CAAGTTATATGGTTCACACTTTCCTCTAGTGGAATCAACTTATTTTTTTATGATTACCAAACTAGTCTGAATCAAAAATCTTTTCTAGCTCCACCATGCCXXXXXXXXXXGATGCCTATGCTAGGGCATCGGTGACATGGTTCTTCTTCCTCAAGATTACCTGGATATTAAAACCATCAAAACACTCAACAAGATCCTAGACTCTATTTT
>Marker460923	ATAGAGAAGATAATGTGAATGTGAATCAAGGGTGGTGAATTAAGTGTAACCTTAAATGCTTATGACTTTCAGATGCAGTGAGCAAAAGGTGTCTACATTTXXXXXXXXXXTGTTCTTATGTGTTTGCATTGATGCTTCATATGTTTGCATTCTGCTAGTGCATAATAAGTGTTTGAAGATTGGAATAGCATTGAGGGTTTAATGTTTTAA
>Marker604878	CTTTTTGCAAGGTAAATGCCTGCATCTTTTTTATGCTTGTTGGATAATTTGGAATCCATGTTGTGGTTTCAAACAAGTATTTTGTGTTTAAGGGAAGTTCXXXXXXXXXXTAGTATACTTATTTTTATAATAATGAAAACTGAATTATGAATAACAACTTACAGATTTGCCAAATTGAGACTTGAGTCATTCTGTTCTTGTTTTTCCTGG
>Marker412555	CATGAATCCCATGACCTAACCTTGCACTATGATATACAAAATCATTTGTCTCAAAATGCATGTGACTCAATTTATAGCATTGTGCCCTTCCTAGGTTGGAXXXXXXXXXXTTAAATGATTTGGGATGACTAATGAGAATAGAGATGATGAGGGAAGGCCAAGGAAGTCTAGGACTTGGTTAAATATTTTTGATATGTTTAAATATCCCAA
>Marker276255	TTGACAAGATTTTTAGTTGCCCAGATATTGAAGAATACTCAGATGTCACTATGGAATCAACTCATGAGTATTATGACAAGAACATAGAAAGATCCAAGAAXXXXXXXXXXTATCTACTTCCGTAAAGTTCTATATGACATCCTATTTGGTATATGTTGTAGCTTGCATGAGATTCTTTCCTGGCTTATCTTTCATTGGTGATAGAAGGCA
>Marker176793	AAAGATCTTTCACAAACAAAGTAAAGGAGAAAAACTTGTAGGAAAAAACCCCTCTTCAAAGGAGAGAAAACAAGAAAGATGTGATGGAAGGAGGATTGAAXXXXXXXXXXGAATCCAAATCCAAATGTATGTCTCAAAATACAAATCATGTGTCATCATGTTGGAAAAAGATGTCTTCTCCAAAACAAAAATTGTTTGCCCAATTAGAGT
>Marker195881	CATGAAGTTTGAAAAGTCTAACGGCAGTGGTGGCACAACATCAATATCAAGAACCAGACTCTCCCTTCTAAACCTAATGCCTCTTTCCTCCCAGTACGTGXXXXXXXXXXATTGAGCCTTAGCCATACCTCAAGTGGAGTTAGGAGTCTCTAAAGGTTTTTGTTTGATCTAATTTCTTTACTTGCACCTTTGAAATTCATTTCTTCTCAT
>Marker413334	TGTTTTATTCTGCCTTAATTTTTTATGGTTTTGTTATGGGTTCGTGGAATAAGGTGGCAGCTTCTGTAAATTCCTTGGCATTTACTACTAGACCACAGTGXXXXXXXXXXCCTTCACTCTCTGCATAATTGCTAGTCTAGTTCTGCAAATTAGTTATACTGTATAATCCTATGTAATCTGACAATCTTACTCTGTATTATCCGTTTCAGC
>Marker137313	TGGGTTTTGGATATATATTGTTTCTTTGTTGTTTATTGCTGATTTTAAACCAATGTGTATCAATGATGTAATTGGGTCATTGCATTTATTTTGGTTTTGAXXXXXXXXXXTTGAATTAAATTGGTCTATGTAATGTTTTTGGCTAGTGAAAAGATAGAAGCCTTTCTATCCCTTGTCCATTCATGTTATTGATTTTGGATTTTGGTTAGG
>Marker175192	CATCATGATGACATTATATGCTCTTACAACCTCTCACACACATTACAAAATATTGACACATGGCCAAGAATGCCACCTCAAAGTGGGACACCCTCTTTCTXXXXXXXXXXGCATCACCCTTCCATCCTCCACCATGTGACGAACAAATTGATACTAAACATCTATATGCTTCGTCCATGCATAAAAAGTTGGGTTCTTTGTCAAGCTAAT
>Marker428849	GACTTGTCCCAGAGGTTCCAAGGATCATCCTATAGCATTTGTAAGAAGGAAGTTGTCCAAAAGAGAGAAGAATTATACCACAATTGAAAGAGAAGTTCTAXXXXXXXXXXAGAACTACCTGGCACAAATATTTTCAAAGTAAATGTCGTAACAAAAGAACTAAAAGATATATCATACCTATTGGCTACGGGTGAATCCAAATGAGAGGTT
>Marker456855	TGTCCTTCAAGTCCTATTTGCCAAGACTCCTTTGAATCTCTTTTGGTCTCTTTGGTATTATTTTGTAATTCCACGTCCTCTTAAAATATGACTTGTTTGTXXXXXXXXXXACATTGTAAAGGGTAAAATTTGGATAGTTGAGTTTTTGGTAGTTTTGTGTGTGTATCCTCCTTTCACCCTTTCATTCTAGGACCTAGGGTTGAGTTGCAA
>Marker194060	TTAGTGAGACCTTACATTTGTCAGTGAGACACATATTATAGCCAGTGAGGCTTCTTTGTAGCTAGTGAGGCTTGGCTGGTCAGTGAGACCTATATGTAGCXXXXXXXXXXCACCCCCCCTCTTAGTGTTGTCCTAGACTCCAACAAGTGGTATCAGAGCCTAGGTTCCCTTTTTTGACATCTAATAGGCTTGGGTAGGTCTTGTTAGCGG
>Marker227346	CAACTTGCAACAATCCCCCCAGTGCAAGTGATAGGTTCAAACCCATGACCCAGGCTTTGATACCAATTGTTGGAAATATGGTTGTCATTGCACCAAAAGAXXXXXXXXXXCATATCTCAAAGGACATAGCCTCAGAGTTGGCTACGTAGAAGGAGAAACTTCTCAATGTTGAGAAGTGTGTGATTGATTTCATCCAATGCATCCCTTGTA
>Marker318393	CATCCATGATTTCTCTTTTGATGCTTCTTCATATATTGGTGGTTCAACTTGAATTTGACTTGATTCAAATAGGAAGTTTTGTGATAAATTCCACCAATTTXXXXXXXXXXGATATTATAAAACTGATAACCTTTAGTTTCTTTATAATATCTGACAAAAATACAACACTGGAATTTATCATCCAACTTTTTCTACATGTTATCAGGAACA
>Marker215243	GATTCATATTCCAGTAGATAAAAACATCAAAACTATTTTTGTGGAATCCTCAACTTCTAAATTTATGGCAATTATGCCACTTTCTCTTCCTTCATAGAAAXXXXXXXXXXTTCATTCATCGTTGCATCTACTCAACATCTTTTGTTTGATATCATGAATCTTCTTCTGACAATCCCTTTTCTTGTTCTATGACCATCAATTGTCACTGAA
>Marker374924	CCACTATTCTCAACACTTTTTGATCAACAAGTTGCAATGAAAGAGAGGTGAGAGAATACAGTGGGTAGTTGTAATAAGACATTAAAAAGTAACTCTTAGTXXXXXXXXXXAACCTCCTTAAGAGCAAAGCTTGAGTCAAAAATATAATTTTGGATGATCCTTTATTCATTACAACCCTCAATATATAAACATAACAAAGAGTGACCTAGA
>Marker448390	CTAAATTACCAACTTAATTCAACTAACATATTCCATTATATTTCTTATTTATTTTCCTATTTCCTATATTTGAGATGACATATCAGTTTTGCTCAATTACXXXXXXXXXXAGCTAAACTGACCCTAGATTAAAAACTATAGACATGATAGACAAATATGCATGCTATACAAGGTTCATTGAGGGGGGTTTTGCACAAATGAAAATGATTA
>Marker312680	ATTCTGTAAGGAGAACCTATCTTGAACTTTTGTCTTCAAAAGGCCTTCTTTGTTAACCGACTGTTACAGTTATGATTCCTATTTTGACGTAATCTCTCTCXXXXXXXXXXATGCATTGCCTTGTAGGAGTAACGTCGCAAAAGTCAATGTTGATAGCTGGTTAATGTTACTGAAAGACATTATGGTGAAGTTCTTTCTTGTGGGCAAGGA
>Marker453419	TATTTATTTACAATGATGGTAAAAGTAAGTTTTATCTTGGGAGTTACTTCAGGTAAAAGGTGGGCATCCAAGTTTAATAATGAATTATGATAGGTGCAAGXXXXXXXXXXTTTTTCCCATGTTGGTGTGACATTCTATGTGCTCTTTTGTAGCTTTTTTTTGTATTTTATACAAGCTTGAGGAGTGTATAGTATGATTTGAATGTTCATA
>Marker394876	AAAATTTGCCAATCATTTATTTTAGGTCCAGACATCAAGGTGAGTGCAAATTTGAAGCAAAAAACTTGTTAGATTGAACTTGTGTAGTAGAAATAAGATTXXXXXXXXXXTTTTTTTATTATAATCATTTCAATTCATTATCTTAAAGTAATTTCATTATCATATTGGTTTAATTAATTTATCATACATTATTTGGATAAGAAACATATT
>Marker229843	CTCATACATCATTTATGAATCCATCTACAATGATCTTTCATGGTAATTAACCAATTCGGAAGACAAGTCTTTAACTAGTCATAAACATCATTCATCACTCXXXXXXXXXXTCATAAATAATTTTCTAACCACATTTCTAATTTTAACTAAGAAAGCATATAAGAAAAGAGATTCATTACTCTAACAAAGCATATTCTTCCTAACTAATCA
>Marker310225	CTAAGTAAACTTAACTAGACAAGTGAGAATAGGACGTAATGTGGAACTAGTTAAGTAATATACCCCATTCACACCAACACCCATATCCTTTTGTCTAAATXXXXXXXXXXCATTCCCATCTATTCCCATAGTTACAAATTTCCATTTTTTTATCCTATCCATATTTGACCTATTTCTACACATCCGCCCTATTATTAGCCTAGACTTCCA
>Marker426081	TACCCCAATGGGTATATTTATATTAGAAGGTGACTACATGAGTTGACCAAGGAGAAAACTAATACCTTGCAACATCAAGGAAAAAGGAGAACCATTTCAAXXXXXXXXXXTATCAAAAAATCTTCAAAGCAGTTTTGGCCTTAGTTTGTGGCTTGTGTCCTTTTGTATTGTGTGTTGGCTCTAGTGCAATTGAAGAGATGTCTAGTTGTC
>Marker465391	TCTTCATTAAGGAGAGAATCTAGCTTATACACGATCATTAATCCAACTCCTATCATGTCCATAATAATAAGTCAACAATTGTATCTAACCAACGTGGTCAXXXXXXXXXXTCTTGCACACATCAAAGAGCATCTAAGTAGATTCACATGACATCAACATTGCATTAGCATTCTAGGGCATATTATATGATTTCTTGTTGTCTTAGATCTT
>Marker268716	ATGCTAGACTCTCAGTGTGAGTAAACAGAGTAGCAAGGTTGGTGGTTACCTCAACAATAACAAATGGCACAAATATTTTTGGCTTTTTGCTTAATTATTTXXXXXXXXXXCCTGAAGTGCAGTGGACACATTGATAGGCACTTGAATTTAGTGAGGAATTGTAGAAAATGAACATAAAATAACAATAATTTAGGTTATTTAATTAAATAA
>Marker239238	CTAAAGAGAAGGTGGGGACTGTGTTTCCCCATCCTATGTTGCATAAAGCTTTTGAGGGACCAAAATCCTCTCTGTGAAGGCAGGTATGATCCAAAAAAAAXXXXXXXXXXGTTGATTGGTAGAAGTTCTATCACATGAAGCCATAAAAAAGGTTGATGGAAAGATTGACTCCTCAAGGTCTATGTTGGTTGGGCTATGCCAGTGCACTAG
>Marker361999	AATATGTCTTTGAGGAACACAAGTAACTTCCTACACTACTATGAGATACAACACAGGATTGATTTGATTCCCAGATATCCTCTTCTTAATAGCCATCTTTXXXXXXXXXXTGATACCATTAGGTTTTCATTCATTTTGAAGACATCTAGAAGATAACATTCAAAATTGAGGGACTGTATAATGAATGGTTATACCTTTCAGTCTAACTAA
>Marker134961	ATATGATAAATCAAGTTGGACATTTCCTCCTATTGTAGTAGTCCACTGTCTAGACAGTAACATACCATAGTATGGTGGAGTATCAATTACGGTTATATCAXXXXXXXXXXTGTGTCACTAAGATAAATTTCTAGAGTTGTCATGACCTCTCATCCAAGATTGTTTATTTTGTTTTCCAGCCCACCTTTGTTTTTGTTTTGCTACTGATTT
>Marker252248	CACTATAATGGATAGCGAACTCTTGTTTATTGGTTTCAGTTTACAAACAAGTCCCTCTTTTTTTCACAGAGGCTGACCGACTTCATACACTCTGGATTTTXXXXXXXXXXATTGTATGGGTGATGGCGAGCCGTAAATTTGCCATGAGATAGTCAATCAGTGCCCAAAACAAATTGTCTTGGTCTTGTTTGTCAATTATGTCTCGATCTG
>Marker95400	CCTGGTCCTGCATCGATTCAAAAATATTAGACATAAAAGAGCACACTATTTTAGAGCCCTTGAGCTGCCTATCTTCGGGCTGAAAGAGGTAGTAGCCAAGXXXXXXXXXXGATGAGTTGACAAGCCTTAGAAGATCACATTCTTAAATACGAGTGTTATGGCATGAGTTCTCAATGAACGAGCAAGCAAGGTGGCAGGGGCCGAGGGAAT
>Marker465970	AACCCTAGCTAATGCAAAACTATGTTATATGGAAAAATGCACAATTTCAAGCAATTTTTATCAATTAAGCATGAAAATGCAATCTAAATGAATGATGAATXXXXXXXXXXTGTTTAGTGTGAAAAATGTTTAGGGTTGATTTTAATGGTTTGTGTTGATCCTCCTTTCACCACTAAACATTCAAGAACATTCAACCAAGTAGACAACTCT
>Marker439389	TTCACACATAGACTTGCAAAGGATGTGATCCAATGGCTACTAGAAAGGAACAAACTACCCCCATGTCAAACTCCCATTCATGAGCCTACCAAAGAACTTCXXXXXXXXXXAATCAAGAGCTATGTCAAGGGTATATTCCTAAGTATGTGGAAACATTAAGCCCTAGTCTTAATCAAGATCAAAGCACTTTCATTCAACCTATCCATAACA
>Marker598746	ATAAGTGGTCAGATGCATACTTTCTTATACATTAATAATTTATGAAAGACTTAAATAATGCCAAATTTGATGAGAGCATTTATTTTAATATATTTATGTAXXXXXXXXXXTCTCAAACATGCAAAAGATTTGTTGAAATTAAATGAAATATTTTAATATCATTCACAAGAACATTTATTAATGCAATAGTAGCTTATTTATTAAAATTTA
>Marker209180	TTTCATTTGTAAGGGGTGAATGAACTTTGTATACTTTTTTTGATCAAGTGATAAGTGTATGCTCTCTCCTCACACTATTTGGTGACCTTGGAGATCAAAAXXXXXXXXXXATTTGTCATTTTGGGCTAAGCTTGCAAGAACTTTATATCGAGGACATCCTTAGAATCCTTGTTCATCCTAGTTTAAGACCTTTCAACCATCCTTCCTTGT
>Marker325195	GTGTCAAGAGACACTGCTGCATCAGAGAAAGAAGTGCTAGAGAAAGAGAAACAAGATGTAGATGAACTGAATTTTCTGCATGACCCAATAAATCTGGATAXXXXXXXXXXAAAACATTGGAAGAATTAAAGACAATGATAGCCAAGGATAAGATTTCATTAGATAATTAAATATCAAACATTCAAAGAGCTATGAGAGAAGCTGGAGATG
>Marker362353	ATCCCACCTTCAATGGATCAAAGACATTGACAATGGGTGAGATTTCTTCTCCCATTATCTAAAGCATAAACACAAAAAGGATTAAATTTTAGTTATCAATXXXXXXXXXXAGAGTCCATGCAAGAATGGTCTCCTAGTTGAATTATACATAACTCTTTGGATACACATATAGGAAGACTTCTACTATGTTTACATTAAAGGCATTAAACA
>Marker137536	TAAGCAAGTCTAATTGGAATCAATAAAGGCACTTTATAATGATAGTGTGAAATTCTCTCCAATAGATCAGGCCTGAAAAATTAATCACTTATTAAAAAATXXXXXXXXXXTAACGTTGGTAGTTTATTGAACCACTAATGATTACAATTAATGCTAATGGTTACAATAGTTATACCATAAAATGTTACAATAATAATTAGTGTGAGGCTT
>Marker615261	AATTCAAAATAACGTGTGATCTATTCAACCCAAGGTTACCCCATTAAAAGAGAAGAAACCCTAAACCTAATTCACAAGTGAATTCTAGGGCAAGTCAGGTXXXXXXXXXXTAAGGTTAAGCAATATGGTGTAATCATGGTTGATGCCCGAGTTGGTCAAGAGCACCTTCTGGGCTAAAAACCAATAAATCCTTATCTCAAGTTGGTCTAG
>Marker536378	TGCCTAGTTTCCTGTATGGCAGCAATTACTGGGCTCAATGCCCACACTCCCTCTCTACATATCTTCAATGCCTTACATCCAATGCTTTCTTCATCTACTTXXXXXXXXXXATAAGAATGGGGAGCTTCAATTCATTGGTATTTCTAGGATGATTTCTAACAGTGTCCTCTCTCATATTCGAGATGTCCCAGAGCTTTGCGGATCAGTAAA
>Marker428691	ATACATGAGAATCGACTGGATCCTACACCTGAAAATTTATTGCTTACTGTTATAAAGTTTCTCTAATAGAAATGGAATGCATGTGTTCTTTAGATACTGCXXXXXXXXXXTGTGAAAGTGGATGATATTTAAGAATAGCCCTTCTCAAATACTCCTTTGCCAATATTTGTTGTGGCAAAGGTAGGAAAGTTCTTATTAATATAGGACATT
>Marker365262	AGAGAAAGACCCCACATTGTAGTTCTACAATGAACATATTTGGCCAATCATTCATTACCGATGGGAGAAGCTCAACACTCCCTTGCACATGGATGCACATXXXXXXXXXXATCTGCTATCCTAGTTTTCTAGTTCTTTTGCTGCTAAGAGGGATTGATCTACTCATAGTTCACAAACTTGCTAAGTAATCACGAGTTTTTTTCACCCTTC
>Marker100411	TTCACATTAAGTAAAAAGTAATATTCCAAAGTGGTAGAAAATGTATGATTGCAGATGTAGATTTTCCAAAGTGGTAGAAAATGTATGATTGCAGATGTAGXXXXXXXXXXGATCAGTTATGAATGAAATCGTCTCATGCACGCAACGAGTAGTTCTTTGTGCATTGATTATTTAAGCAACTAGTTAAGAAATGTTGGTCACAATTATATT
>Marker122261	TAGGAGATTTATACTTTAGTATAACCCATAACTCTATGCTCCCTCCTAGCCATGACCACTCAATGATGCATTCAATCCTCATGTGGGCTTGTCGATATCCXXXXXXXXXXAAACAAATAATGTGAACCAATCAAATTAAAACCAATCCACCCTTTAGGCTCTTATTGTTGCTACCTTGGTTGAAAGATTCAAGAGTTTAGAAATTAGTAA
>Marker361701	CTCAGGAATTTTATGATGCCATATATCTCTTTGGCTCTAACATCCAATCCAGATTGGAGCTAAAAACAATACACTTCCAACATAGTGTTAAGAGTGTTTGXXXXXXXXXXTGTATCGATCTTTTTATTTATTTGCTTTAGATGTTCAATTAGTTTTTTTTAAAATTCTTCTAGTCCATGTGTGTTTGGAATTAATTTGGTATCAAGATAG
>Marker101195	ATCAATAGTGAGAGGGGGGGTGAATCAGTGTTGAGTCAAAAACCACAATTTATGACTTTTCAAACTTGACAATGAAGTTTATCAAAAATTGAATTCAATAXXXXXXXXXXCTGAATTTGCCTCACTGACATACAAAAAGTCTCACTAACATTTTATAAACACTTTGGGTCCACATACAAATCTTATCAGTGGATTACCCTATTTCAATCA
>Marker410329	TGAAAGAAAATAATGGATTGCCTTACCATCCAACCACGCAACAAAGCAACATAGACTGGCCTGCATTCTAAGCTTGTGTCTCTTGCTTTACAAAAGTAAGXXXXXXXXXXGATTTTTATTGAAAAGGTCAAGAACAGACATCCAAGATAACTCGAGTCTTAATCTTTATGATTGAACTGGCCCACATGTCCAAATAGATTGGATCACAAA
>Marker355769	TAGGTTATACTAGCAGCAAGTGTATTTTGTTGAAGCAAATAGGTTTTAGTTATGGTAAGAAATGTTTTCATCTTTGTAAAATGAGAAATACCAGTATCCAXXXXXXXXXXTTTATCCAAGTTCTCTTAGAAGGTATCAAGTTTTGCACATCTCAAAGAGACAACCCTTGACCACAGGCAATCCACACATTATATGCATTTAGTTGAAATC
>Marker183830	TGTCCAATTTAGAATTCAAAATTCAAATTTAGCCAACTAACCCCCTCTACCCACTAAACACACTTTTGGCACAATTTGGTATTATATTTTAGCATTTAAAXXXXXXXXXXCCCAACCCCCAATTCTTAGAAAAGGTAGAGCAAAGAACTACACACCAAGCGAATTTGCATAATAAAACCCTACATATTACTATGGCAAACTTGGCACGCA
>Marker436876	AATAACTAGTCCATTTTACCTATCATTTTAATTCTTTTGATCTATATGCCTTCTAACCTATCTATTGGATTCTAAATTGAGGCTTCTAGCTTCCTTTAAAXXXXXXXXXXAGTAAAAACTAACATCTAATAAATTAACATTAACATGTTAATTTATTATTTATTACATTATTCTATGTCATGCACTAACTAATTCCTAACAACCCCATTT
>Marker94463	TATCCAGTAGACTCTAATCCCATGTTTGAGGATGTTTGGAATGATCCATTTGCAGAATGTGAATGATCATACGATTTACCACCTTAGTTTGTCCATCTGTXXXXXXXXXXACATGAATTCTATTGAGACTCAGTGTGAAGGTCCATCAGGAATAAGAAGATGTAGATATAATCCTTGTTTATGATTCATTGGCTTTGCATTGGCACATGC
>Marker339931	TAGATGTCATGCCAATAGCTTTGAACAAACCCAAAGATAACAAGCAAATGTGCAGTATGCCCTAAATTGTTCATGCAATGTTGATATCACTAGATGATTAXXXXXXXXXXAAGTCAAGCATATGTAATAAGAAATGTGATTAGGAAATGCCCCTTGTGAATGTAATCCATCAATGTGTCATAAAATTAAGTAATTCATATGTAACCTTAT
>Marker356023	CTCCAGCTAGAGTCAAACTCCATATTTACTAGATCTCTCGATTGACAAAAGTGTGGTTCCTCAACTAGGTGAGATTTGGAAATTTGGGAGGGGAAGGAAAXXXXXXXXXXGAGAATTCAGTTGCTCGAGATAAGGATTAATGATTATTGATTGCCCAGATGTCAAAGTTCAAATGTGGAAGTTATTGCATACCTCAATGATTTTGTTGAA
>Marker136738	TCTGCATCTAAACAACAATTGGTGTAGTTCTTAGAAAATTCTTTGAACTGCATGAGATAGAACAAGTTTTGGTGTAGTTCAGAGAATTTTCTTCAAACTAXXXXXXXXXXACTCTCTCACTCACTACTCTACCAAGTTCATACCCTTCATGTAGTCGTCTTCTTACCACCAACTTTTATGAACGATTCTACTTCAGAGAATTTTCTCCAA
>Marker355918	CAACCTAGGTAGCTAACCTAGTTCCCGTGAGGAAGAAAAATAGGGAGATAAGGATCTTTGTAGACTTCCATGATCTAAGTCATGCCTCCCTGAAGGACCAXXXXXXXXXXAAGGATTTAATAACGAGTTCATCTTGATTTATCTAGATGACATGATAATTTCTCTAAGGTAGGGGAAATCACATGGAGCATCTAGAGAAAGTCTTCGAAC
>Marker298132	TTCGGTAATAACCAACATGTCCTAAGAAACTTCTAACATCGGTTTGGTTCTTTGGGATTTCCAGTTGTTGTATTACTTCAATCTTATTAGGGTCAACCTTXXXXXXXXXXTCAGTTTATTCCTAGTGTCAATCTAGGGATTCGTAAACTCATGAAAAGTGTTGTGGCTATATGCCAAGGGCTAAAAATAGTAAATTAAGTGGGGATGCAA
>Marker187112	AAAGGTGGAAGTTCAAAATCCAATGATGGATGATATTATTGCTTGTTATGCTGAATATAGATCCCTTCCAACGGAATTCAAGTAGAAATGTCTCTTACAAXXXXXXXXXXAACCTCATTAATTCTTATAATGAGTTCAGCATGAGGTTGATTGAGTGGTTTGATAGAAGAGACCCTGAGGTCCATTTCAGAGAATTGGCTCAACTCAGAC
>Marker279399	CATATAGTGCCAAAAATGGAGACATTTTGGAGGAAGTATGGAAAGAAGTGTTATACCACCATTTTGCTAGTGGCAACCATTACACCCATCTCTCTTGTTTXXXXXXXXXXAGTGCTTGCTACAAATGGGTGTGCCAACATGGATAAACTATCTATCAAAAATGTATGATTCCACATGGATAAACTATGTATCAAAATGTCCTACAAACAT
>Marker303954	CGTCATCCCTTTAGTCTTCACCCGACTGCTTAAATTATCTAATTTTATCTGGTCTATAGGTAAGTAAAAAGGTTTTTATTTTCTCTCCCACCATTCAATTXXXXXXXXXXCACGGCAGAAGAAGCGACCAGAACAACTATAAGTGGATTTCTCAATGAGCTGCTAGATATGCGTTTAAGACCCAATCCGATTCAGATATATTGGATGACG
>Marker230074	TATCCAAGGTATCACCGAAGTGATTTTCACCATTGGACTTTATTAGACTCGGGTTTTTCTTGATTTTCTAATTTTTTTGGGATTTTTTTTGTTTTTTTACXXXXXXXXXXTGTTGTAGCTCCTGTGTAGGTGGTTTTGATAGGCTTGAAGGTGATTAAGATAATCTAGGTGTTTCATCCAGGAGTTTTAGCTCATTGAATCATGCAACTC
>Marker83180	AATAAAAGATTTTTGGTGACCATTCCTATCATAAGAAAGTTCAAAGAAAGAAAACTCATTGTTAACCCCCTACAACACATGAAACAACTGTTAAAATTTCXXXXXXXXXXATGAAAATATGCAATTACTTCCTTATGCAAGAAGATATTTACATAAGACATGCATGATGCCACACACCAGAATAATTAATAACTACAATTGACTTACAGT
>Marker162094	TCATCAAGTTTGATGATGTTTTGGTAAATGATGTCAAAGTTGATCATTAGTCTTATTTATGACTTTATACAAAGAGTTGGCATGCCTTCATGAGGTATAGXXXXXXXXXXGTTATTGAAGTGGCAACTTAAAGGGGTTGCCATCATGGGGCAACCAACCCCCTTACCTAACACTACCAACACCGCCGGTTTCTACATTGAGTGAGTGGGC
>Marker727714	ACAAGTTTCAATATACAATGGCAAAGGTGACCCAAACACACATTTGAGATCTTTTACATCTAATTGTGTAGACTTCCTATACGAGGATAAGCCATTAGCTXXXXXXXXXXTACATGATTTTGAGTTGTAAAACATTTTTATTAGGGGAATACTTAAACCAATATAGGACAGTGTGCATGTAAAGAACTTTACATGTTTCATGGACTTTTG
>Marker522481	ACGATGTGCCCTGTTAACCTATAATCCTGAGCATTTTTCATAGCAGGAAAATATGATTAAAAGTGACTTGTATAATAGAGCAAAACAGTTTTGGGTTCACXXXXXXXXXXCTCTCATTGAACCTAATGCATGATAATCCATTGTTGTTGAAGATATATGGAACTTAAAACAATTTACTAATTGTAGAAGCATAGCTGGGCTCCTAATTTC
>Marker302301	ATTGAAGTAAAAGAACTAACCTATGAATTATTGTTCATAAACTAAGAATATAATTATAATATTATCCACCTAGAATTATGTGTAATCTGAAGAAGTGTCCXXXXXXXXXXAATGAAAGTGATGGAAGAGTGTGATTATAAGACGTGTAAACATAAAACTATAACATGCAATAAACAATAGAAAAGTTGAAGAGGATAACAACAATGTTGT
>Marker151124	CATAAAGGAATCATTTCTTTGCATTCAATTGATATCTCAAAATGACGGGAGGAAACTCAAATTTATAGATTTTTGGAGGTCAAGATGGAGGGCTAGGATTXXXXXXXXXXGAGGAATAGTGCCACATGAAATTTTAAATTTGATGAATAGTGACACATGGAGTGGGTGAGAGGACAAATGGGGCAATTGGAAGATTTGCCATGCTTCCAA
>Marker285464	GATGAAGGCAGATGTTCAATAACTCTAGAAATACCCATGAGGTAGTGTTTCACAATTGACCATATAGTTATTCTTAAAGATACACTCTGGAAGATCCCTCXXXXXXXXXXCAAAGTCTTTGGACTTTTACAGAGTCTCAATCTATAACATACTTCTTTTGCAATCGCTCTAATTACACTTGACAATGTTCAATCCAACACTATCAATGTT
>Marker341471	GGATCTGAATAGCCCCATTATATTATCAATGCTGTATAATGCGATCTTTCCAGTTTATGCTTGCAATAGTTCAATAGCCCTACCCTGGAATTTCTTATAGXXXXXXXXXXGGTTGGATGCAAAGACTCGTCTTCTCCCATATTCAAGCACAGTGGCAGTGGCAACGGTTTCAGTCATTTAAGTTGTGCAGAAGTTTGAATATCCTTAACA
>Marker623555	CCTTTATTCTTTTAACAGAGAATACAATCTTGGGTTAGTCACCTCATGGTTTTTCCCTTAACAGGGTTTTCCATGTAAAAATCCTTGTGTTATGTGTGTTXXXXXXXXXXTTCCATGAGATTGTGCATTTCTTTGAGGCATCAATTCAAATAGTTCACCACCTTATCTATGCTTCCACACTTTGCATACATGTCTACAAGGGTAGTTGCA
>Marker359762	GGAGTTATATAGCAAAACAATCAACTCAACGAGACAATCGCAGTGAGATGAGTGCCTTGATGATGAAAAAAGCTACCCAGTTACCAAAAGGTGTATCGGAXXXXXXXXXXCTGGACCACTGATAAGTAACTACCACAATTCCTTCTTTCAAACTACAACATTATAACCTAATAATTATCTCCAATTTACGATCATACAAGCTTATTCTAT
>Marker343197	CCGCATCTAGATTCAAGGGCCAGACATGTATTATGGGATTAAGATTGTTTGATCCCAACCAAATCTTTTGTTTCTCAGTTTGCGGCTCTTCCAACTTGGGXXXXXXXXXXTATGTCATTTCAATTACAAATGGATTCTAAAACAAAGATATGCTTATCTACTTCGGTGGTGTCCTCTTCAAACACTAGTAGCTTAATTGTTGAATCTATT
>Marker630508	TCTCTAGTGGGAATTTGTATAGTTCTATTCAGTGGGTCATATCATTCAGCACTAGAAACTATCAATTCTACACACTGAGCTGATGTAGGGAAAGCAACAGXXXXXXXXXXGTTTGTATTTTTAACAAGTTAACTAACATGTCACTAAGTCATGCTATACTCTATGAGATTAAAATCTATCCAACTAAGTCATAAATGCTTATACATGAAA
>Marker183732	TGTTTTTGTCATTGTATGTTATGGTTGGCTTGCTTCTCTCTTATATGTTTTTCATCAGATTTGTAAGTAGTCATGTCATAGTTTAAGAAACCTCATTTTTXXXXXXXXXXGGTTGGGTAGCATCAATCTCAAGTAGTTCCTCCTTCTGAGTTACTAATTCTTTTCATGAACAAATCTCTACATTAGGAATATTATTTGTATGAAGTCACT
>Marker462506	AACAATCTCTCACAAATAGAGTATAGGAGAAAAACTCATAGGAAAAAAACCCTCTCCAAAAGAAAGCAAAGCAAGAAGAAAGTGATGGAAGAAGTGATGGXXXXXXXXXXACTCCAAAACAAGAGATGAGGGAAGAAGTCTCATGAAGTTTGACGTCTCTAAAAATTGCTCAAGTGTCACATGTCATAATCAAAATATGCCAAAAAATTA
>Marker138887	CAGCAGCTCTCATTTGATATCATTTAAGAAAACTGGTAAGTGTGCCCAGGCACAATATTTATCCACTTTGTCATTGTTCTTATCAATCTTTTCTTCAACAXXXXXXXXXXGAAAACAAATGGAGAGGAAAAAAAAAATGTCAAAATTCATTTGGCATGTCATGTATTGTAATCTGTAGAAAAGTATCTTATTTGACCTTAGAATAAAGCA
>Marker276828	TATTTTATGATTCCAAAATATTTGGGTCCTTTGAGAAGATGGGTTTCTATTATAAAACTAGGAACCCTATAGATTCACTTCTCCTATTGATTAGTTTGGAXXXXXXXXXXGATTTCCATATTCTTGGACCTTGTGCCATGTTGCCATCAAAACTATGTAATAAGAGGACAAGTTGGATGATCAGTATGACATTGATTCCCATGAGATAAA
>Marker355117	TCTGCAAAGCATCCTACTTGACACCATATTAATGTAACCAACCAATTCAAGAATATTAGCTCCATCTTCAAATGAGTAGCACACACATTACTTATTTTCAXXXXXXXXXXAAACACCTTTTTGACATCAATGACAACCTAACACCATCAATTTTAACATCCTTAGGCCAAAGCGTTGTAGCCATAAATAGACTTTTCCAACATTCTTCTC
>Marker271745	CTTGTCACATGACTACAACTTCCTCAAGAAGTGGGAATAACTAATCAATCCTAGCCATCCACATCATTCAATTAACCTTTTGATCTCAACCATCCATTTAXXXXXXXXXXTGTTTTATCATTTTTATTTATCCAAATTTTTTGCATATAGGAATAGCAATGTATAATCAGATTTATACATTAATCGAGTATCACCAATATGAGAGACTTT
>Marker468835	AATACTTAATTTGATTTCAAATCTTTGGCCAAAGAATCTTTTAAGTTGACAATCATAGTGAGATAGGCTAGTAAACCTAACCTACCCTTCTCTGTGACCCXXXXXXXXXXATCTGTAATACAAAACTAATCACACTAAGCCAACACCCCTTCCCTAATCTAAGTGTCACAGTTGCAATAGGTATCTACTAGATAAATTTACTCAAGTTCA
>Marker408076	TTTCTGTGGACAGCTACCCAGAATATGGTCGTTTGTCAGGGCGCAAATTAGATGATAATCGAGCAGGGGAGCGTGTTGCAGTGGATTCACGGAAACAAAAXXXXXXXXXXCAGCGCAATGAGTGCTACACATTTGGGTCACTCTTTTGACATTCATGGTGGAGGGGTTGATCTCATATTTCCCCATCATGAAAATGAGATGGCTCAGAGC
>Marker227139	ACAAACCCTTACTAAACTTATTAATCAAAACCCAAATAATTATTGTTGTAGATGTATACTCAGCAAACCCCCAAACACCCACAAGTTTTTGGATATTATTXXXXXXXXXXGATGTGGCGAAGTTTTGTCTCATTTTGATGATGCGATTGGACAAGGTAGCTTCCTACTCTTGTATGATACCTTTCAAAAAGTTGCAACCAAGATAGTATT
>Marker334284	ACATTTCATATTACTAAATCTTTTTAAGATTCAATCGTTAAGTTCCTCAAATGTTTAGGTCAAATGTGACAAATTCTGAAAATTAGGGAAAACACTTCCAXXXXXXXXXXTTATTCCTAATGGGTATTGCATGTTGCTATGTAGAGTTTAATTGGGAAATTTTAATGATGTATTATAGAGTTTGAATTGGGGAATTTAGTGAAGTTGTTG
>Marker269446	TGACTTCATTAAACTTATTTTATTAGAAAAGTAATGGGAGATTAGGGCTAGTTAATTCCTTGAATTTCTATAATGATTTTCTTTTGCTGTGTTTGTATTGXXXXXXXXXXGTCAGACAAAATATTTGACTGTCTTTAATATGCAAATCCAAAACTTTAAGACTAGCACACACCAGTAGATATCTAGCACAATTTTCCATTGCCTTGTTTA
>Marker214951	TTTTACGACATAACACAAACCAATTCCTACATAACCCTATGAGATAATATGATGCATACAAGATTACAAAATTACCATAATGCAAATATCAATAGAAAAGXXXXXXXXXXTAGCCAACCCAAACCACTAACCATGTGCTTGCTTTTATAGACTCAAGCTCACACAAATATAACTTGTGGTATTGGGGAAACCATGTGACTCAAAACCATG
>Marker378406	CGTTTATGGACACATTGAATACATTCTATCATTGAATTTTGAAAAAAAAATGTTTTTAAAGAAATCCAAGCAATTTTTTAAGTTGTCAAGTTTTTGCAGTXXXXXXXXXXAGCATCATATGAATTTAATAGATGGCAACAACATAGCTTGCACAATATAGGTTTAGCACTTGATGTCATCCCATCCACATGCACCACATGTCATACACAT
>Marker556787	ATTCACACAATATGAAGGTTTCTTTTAGTTGCTTTGAGTGCTGGGTCGTAATGCCATTTTGTTTCCTAGGTCTCACTCTGTTATTGCTAAATGTTATACTXXXXXXXXXXTCATTCCATGTCTAAACTAATAGAGCATGGCTGATTCACAAACAAACCAAGTGATACCAACAGCTATTTAAGAAGGGAGAAAAGTTCACTTGGTAGAGCA
>Marker771409	AGACCAAATATTGTCCAAGCAGTGGGATTTCTTAGTAAGTTTATATCTAACCTTGGTAGAGAGCATTGGACTTGTGTTAAGAGGGTATTTATATATTTGCXXXXXXXXXXGTTTAGTTAAAGAGATTATGCTCCAAAGTTGGTTTTGATTGCAAGGTGGTTTAGATTGGATGTGATAGTCAAAGTGCTATTTGTTTGGCCAAGAATCCCA
>Marker480705	TAGTAAAAAAGAAAATGAAACCTGAAATCAATCTCAAATACAACAGAACAATGCATCGTATTATTCAACAAGGCCTGTTGAAATTCACAAGTGGGATGATXXXXXXXXXXTCATCAATCCACTGAGAGACAACAGGAATGACATTTTTTATGCTCTCAATTACCACTAAGCGATAGCTCCAAGGCTGCTTGTTGAACAGGTGCAGTAACT
>Marker309594	ACAAATTGATGAGAATTTGATTATAGCCAAAAAATGGTTCATGAAAAAGAGAAGCTCATGGCAAGTGGTAGAGTCAACAATCATATCAATATTCAAGAGGXXXXXXXXXXTGGCATGTGCTTATACCTCCAAGAAAAGATATCCAAAAAGGCATGAAGAATATCAAAATGCGCCTTGCACTAAGAAGAAGAGAGAATTTTGCCTTTCTCA
>Marker534919	TAAGAGAATGAGCACGAAAGGGAACAAACTAAAACCATATATCCTATTCCACTCATAATATAATGCAACCTCATTATTGAGCTAAAAGGAATGCAAGCATXXXXXXXXXXAGAGGATAAGTATTGTCCTTGGATCAAGGAAATATCAAGGGTGGAGGATAGTTTTGGATAAAGTGGATGGACAGGGTCAAAGGAGGACAAAAGGACCATT
>Marker225070	TTTCTTGGTGCTATATAACTGATTAGTATAATTATTTTGCAGATAAAGGAACAGAGAAATCAGATAGAAGCCTTTCTTATCAAGAGATTGGCTTGGCAAAXXXXXXXXXXCTGGCATGCTTGAGATATTAGTGTGCTTCTTTTATCAATATATATCAACACTTAGTGCCATCTATAGTTTTGCTTGTAGGGTTTTTTGCTTTCTAAAAGC
>Marker456126	CTAATTATAAAATGACTTCAAACTCAAATTAAGAATCAGACCCAGAAAACACTGACACTTTATATAACATTGCCACTAGTAACTTTGAGAATGCAGATTTXXXXXXXXXXGTGTTAGAATTTTGCAATAAAGTTCACAGTAACATGATGTTCTATTCAAATATCAAAGGGATACACACTCGAGTAGTTTGTTTATGATCTTATATTCTAG
>Marker696965	TTATGAAGGTGATCCCTTTATGTGTCACATGTGATGATGCCACTCCCTTTCTAGGTTGCCTCCATTGAATAGGGTGTGCAGTATGGGAACTCACACCACCXXXXXXXXXXGACAATATTCACATCTTTCACAATAACCCACAATACAATTTTCATAAATACTTAAGTTGAATAACCAAAAACTTAACATGTTATCACCATTTTAATATTA
>Marker409906	ACAAAGCATTACTTTTCCATGCAAATTTGTTTAACACACTTGAATCCTTTTGGAGTTTCTCAATGAGAGTTTGAATGTCCTCATCCTTCTCCCACTCTTCXXXXXXXXXXATGCAGGATAACCAACATTTCATTTTCTTAAACTAGCTTCAACAAATTCTTACCTTTGAGTTGGCAACTCTCAAATGCTATGGGCCTTCCTTCTTGCATG
>Marker274646	ATAAGAGAAAACCAATTGGACCACTATGAAGAGCACAAAATTCTACCCTATTTAAAAAATACTCTAAAAAAGGCCTTCATATTGCTAAGAAAACGGTGCTXXXXXXXXXXAGGCAGTTTGGGAGCAGTGGCCTAGAGGCTAAAATAGTTTGTTGTTTGGTAGTGTTGGGCTATCGACAAGGTGGAGAGTGTGGATTGGGTAGACATGCCA
>Marker508056	AGAACTTATGTATATTACTTATTTATACCTTCTAGAAATACAATAGATGTTTGGAGAGAAGAGGAGAGAAGGAGAGATGATGAATGATGAAAAATATTAGXXXXXXXXXXGATGGCATCTCTTTCAAGAATTATAGAAAACAATTTGCATGCCTTGTCCATGGTTCCACATTTTGCTTACATGTGTTCCTCTATAGATAGTGTGGTGGCT
>Marker472334	TAATATAAATAAATGTTACAAAAAGGTTGACAAAGACATTAAAAAAGCTAGCACAATTGAAATAGGAATTTCAATTTTAGTAGGACCACCACATTACTTAXXXXXXXXXXCCTACCCTCTCTACATCACCACTATCTAATGTGCCCCTTCCAATGTTAGCCCTTGTGATTTGTGTATGGTTAAAGCCCATGCCATTTTAAGAGGGATTTG
>Marker313714	TATAAATAAAGATTTTCCTATAGTTGCACTTGCAATATGAAAACTAGCAGTTTTGATAAACGCTTTTGGGATCTTGCTAAACGATGATCTTTTCCTTAGTXXXXXXXXXXTAATAGATAGATATAGTGGGGTTGCCCTAAGCAATGGGGAATCCTCGATGCCTCTCATTATGAAATGACCTATAGATGATATTGTTTTAAACTTGACCTA
>Marker403324	AATTCCTTCTACCACACCACTTTGAATAAGATTCCTTTATCCTGGTTTAAATATCGCATGATTGTGGTTCTTGTTTAATGCGAATGTGCACTTTCATCATXXXXXXXXXXATTCAAATCAAAGTTGGCAAAGAGACAACATATTGGTTTTGATCTCTATATATGGATAGATTTGGAATGCATCAAATAATTTTATCAGAATATAATAATT
>Marker351614	TATGGTAAAACGGGTGGTGGTTTACACCACAAGAATTTTCAAAAATGATGTTGTATGAAAGCAATAACAATAAAATAACTCTATTCTATAATAATAGAACXXXXXXXXXXCAAGAGAGATCAATAGTCTAGAAGTCCCAAAAATGCCCAAGAGCCCTTCTTTTTGTCCATATTTCTCTTTTTGCATATAAGGGGGGAATCTATTAGGTCA
>Marker451077	TGTATGTTCACAGGAGAAAAGAGATTACTGAAGGCGTTAATACTTAAGTGGTCACCGCGATAACTTAGGTGCCATGTATTTTCCCACCGCTCATTTCTTAXXXXXXXXXXTTACCTGCATATGTTTGATCTCCAGGATTATTCTGAGTGAGTGATATATATAGTTTTTTTCTCCTGGGCTGGTTAAAAGCCTGTGGCTGTCCAGTTTTTT
>Marker387924	CAAGAGTCTAAAAACATTCAAGTGGTTTTAGAAAGACCGGTGCATAGAAAATTAGTTTTCAACCAAGAATGTTTCATATGGGCAGGCCAAATTGGAAAGCXXXXXXXXXXTTAAGTGAACTGCTGAGACAAACCATTGCCTGTCAACTTACTATAAGTTTTTTAAAGAAAACCACATTGAGTTAATGTTGTTAACAGTCCCATGTTGGGA
>Marker336711	TACCAAAACCTCCACTAGCTTTTTCATTCTTTTGCACTTGATGTTGGCACTGAAATGATACCCTACTGCATATATCTTGTAGAAGTAGAATTCCTCACAAXXXXXXXXXXCAAGGCAAAACCCCACTTTTCATTGGGGCTTTTCAATTCATGGTTTTAGATTAGAAATGTTTAATGGATGAGAATAATATGAGTATATTATAAATACTTT
>Marker186590	TCATGGAGTAACTAAAATTCATCATTCAGATGATATTTAAGAATGTATCATAGCATTGCAAAGGAACTCTTCCAACACTTACAATGTCTTTTAGCTCTCTXXXXXXXXXXGATAAATGAAAAATGAAACACAAATATTTTAATCAAGATCAATGAAAGATCTGAAAACATGACAAGTTAGATTAAAGATGCAACATATTCATTCCTATTT
>Marker535975	AAGCCTTTTCAAAGAGTAAATTACAAACTTTAGCCAAGAAACCATCAAGAATAGAATAAACTCTCTACAACATATAGGAAGCTATTTAGATATTCGATTAXXXXXXXXXXTTAGAACAAGCTTGTCAAGAAGTGATGGTAGCATATACCCTCAGACTGCACCTAAACATTTATTTATATGATCCTGTGTGTGTGGCTGACATTAGGGCAT
>Marker351511	AAATTTGAGACCCAAGAAGAGTGTTTGATTGGCTTGATTATTCCACCATCTCTAAGTTTCATGAGCTCCTCTTGCATCTTAGGTGCGAATGTGGGATTTAXXXXXXXXXXTTCATGTTTAACAGGTGTAGGTTTCACATTACACCTAGCATGCCCATCAAATGCTCTTTCTAGGGCTACCAGGCCTTTTGGTATTTTATTTGTGTTTAGT
>Marker297787	AACTACTTTAGGAGAAGTAGAGGATACATACATCTAGCTGGAAAGACAGATTAAAATTTTGACATCTGCTAAGAAGCAATGGGATGCTACTTTGGCTCATXXXXXXXXXXAATAGTTTATAAGGTAGAGACTCAGACCTGATGATATGGATATGTATATAGCTATTAATGATAAATGGATATAATAGAGATATAAGGATTCTGATACCAT
>Marker220795	ATCACCAAGAACATCCACACAACCTCTAAACACTTTATCCATAAGATTCTTCAAAACAAAGCACTTGAATATTACTATCAGCCATTGTCATAAATGAAAGXXXXXXXXXXACATCCCTTAACATTACTTCCAATCCGCAGGAAAAGATATTCAATCTACAGAATATGCGGAGCAAAACACTACACTATTCTTTGAGAGATAAAGCAATTA
>Marker363438	GCCTGCCAAAGCATTCCAAAATCTTCACTCTAAAATTCATCAATCACTCAAGAAATGAAACATATCATAGATATTCAATTATCGGCATAAACAAATTTTCXXXXXXXXXXATATTCTCCTCAAAAAATATAAAATAAATCATTTCATGTATATGCAAAAGTTCCCTTTACAGCCCCCTTGTGCCTAACATCACTTTTCTGCACAACTTAA
>Marker316926	TATAGCACACATTGTTTATAGAAATGCTGAAATGGATTAATAATGGAAAATCTGCTTTTTGAGAATTCACTGCTTATATCTATCCTCATCATTAGATATGXXXXXXXXXXTATATGAACAATCTTCTAGCAGATCATACATTATGACAAGAACAAGAGTTGTTTTGGGGCCTGCATCATATGTTATTCCACTTATCAATAATACTCAGAG
>Marker325629	TATAAATTTATCCTCTCTTACAAATGACTCCTCAAGCATTTAATTTATAGGAGTTCGAATACAAGAAACCACCAAAATGGAAACTCAAAACCATGAGTTAXXXXXXXXXXTGACACTAAGTGATAAAAAACAAATTGCTAAAATACAAACAAAGAAACATTTCAAATATTAGAAATTGCAAGGTGTATAACACACCTTATCCCAACATGT
>Marker500376	TTAATAATTCTTTGATGAACCCAAAACCCCTCATCTCTATTTGTCATATTTCCTGCAATTTCTCAAAACTCTCTCTTAGGAGGAAGAAAACGAGAGCACAXXXXXXXXXXCTTGTATGAAACCAAAATAAGCACATAAAAACTAAGATGAAATGACGAGATTTACAATAAGAGTAGATTAAAACTTGCTCACCAAAAGATCCTTACAAAA
>Marker383093	CATAGCCACTAGGTTTTGTAACTATTTTTACTATTCTTGCATTTCGGTGAGTTCCAGTAAAGTAGAATAATTTGAGTAGGTGTGAATAGGATAGTTTAGGXXXXXXXXXXAGGAATGCAACTAGGGTGCTTGATGCTTTAGAAGACTTGCATGGAGATTCTTTAAGTGTATTGTAATCTTATTCTGGGAGATAATACATTAAATTTTGTG
>Marker337349	TTACTTTTAAAACAACTTATAACACCATTTAATAGTCACTTTAATAAATTAAAGTAACTATAGCCTTTTAATTATTATAAATTAAATATTTAATTTAACTXXXXXXXXXXGTAAACACCGATTTGTCTTCAATGTTCTTAGCGGTGATGTTAGACTTAAACAAGGAAAAACCCACTATCCAGAAGCTGATGGAGGAATTTGTTGAGTCGA
>Marker346344	CATCATTCATCTCTTGATCACATAATGTTGAAAAGGAGCAAGAGTCGAGTAGGCAATACCGAAAGGGATAACATGGATGTGTTGGCTCCCAAAGTTGTAGXXXXXXXXXXTATGTTTGACCTATTCAACTGACAATGATCTACTACTTCAATCCTATTGTTTTTGGATAAGGTCAATTTGTGTTCACCAGTGGGGAAGATATCAACTACC
>Marker145664	TAGGTAGAGGTGAGAATAGATGGAAGAGTCGGTTATTCGAGAGGTCGATCCATGACCAAAACTAGTAATGATCTGACAACAAAGGTATAAGTAGCAAATCXXXXXXXXXXGTGAACACCTACCAAATAATCACAAGTGTTATGCTGGGGAGACAAACCAACTAAGAAGTCAAGATGTTGGATATCAATTCTTAGCATGATGCCGATCGGA
>Marker571989	CCAAACACTTTGTAATATAACAGTCACAATTATGTAATCCACACACTGTAATATAATAGTCACAATTATGTGATCCACACAGTGTAATATAACACTCACAXXXXXXXXXXAACAATGCATTTCTAAAAATTCAGAATCAATGTTCACCAAACCTTTAAACTCTTCACAAACAAATTAGAGTTGTTTTGCTCTGTTACTTTCAACCCATAC
>Marker340041	AAATTGTGAGCAAGTTTTGGAACATAAAGCACAGTTCTTAGTTCTCTCTTTGTCCCATTTTTAAGTATGATCTCCATTATGCACATACATTAGTAACATTXXXXXXXXXXAGATTTATTGGAATTGTAGCTCCTTGCTTTGTTTTCCACTTCTTTTAGGGTATGGTTGATTTTTCTTTGTGATGGCAATTAAAGTAGTTGAAACATCTTT
>Marker357225	AATTGTGAATGATAAGTCAATGAAACAAGTTGCTATTCCCAACTATTCTCTTTTCAAATCAACATTTACATAGAGTCTCAATGGTTTTCTGTGGTGCTGGXXXXXXXXXXTCTTATGCAACTTACAAACACCTTTAGATTTTTTCCAATGGCTTGTAAAGTTATGAATGCATATTTATTCTTGCAAAAACAATATAGATTGTCCCAAACT
>Marker388828	CAAGCTGATTGGTCCAAACTCATGAGGTTTTCAGCCTACAATACAGTGTTGAGATCTATTGGAACTTGAGGGAGTTATCATCATGCTCATTTGAGAACAAXXXXXXXXXXAAGATTTAGATGCTATAGCATGACTCGTAGTGTTGGCATGATGGCATTTGAGCGTTTGTGTATGCTTGGTGTTTTTTGGCATAAGCTATTTCATTTGACA
>Marker214747	AAATTTAAAGAACTATTCTACAACTAAACTATGGAAAGAAATGCTTATGTTGAAAGGAAATAATCATTTTAAAAGGAATTACCTTACAAATTCAATGCTTXXXXXXXXXXTCTCCGTCTAAGTGGCCAACTCCTCCAGAGAGTGGAACATTCTCAAAACAATCACATTCAACACTTGTAACTCATAGAAAACATATGTAGAACTATTTCA
>Marker502235	AACAATAAGGAATATTAGATAAATACTACATAGAAGACAACTGATTTTGAAAAAGATGCTTATCCTTACAAATAATTTTCCATTTCCCTACTATAAGCCCXXXXXXXXXXCTCTCCCCACATCCAGAAAAATCAGGAAAAGAATTTCTGCAAGACTAGTGACTCACTCCCCAGGGAGGATGTTATAATTATGCAAAACAGGTTAATGCAT
>Marker197168	ATGAATTGCATATTCATTGGGTGTTGTGATCTCTTACATATGAAGATTAATGTGTTCTTCCAAATTTAGTATTAGGATATCTTGTGCTTGTATGATATATXXXXXXXXXXTACTTGGAATAGTTTGGAGAACAAGCATGGACTCATTTTTCTCATTTTGATATCATTTTCTTACTATGCCTTGTAGAAAACATAAATTCAAGACCTTCCA
>Marker366435	CTTAGCAATTTATTGTCATGCATGTCAAATAGATAGAAAATAGTCCATGATATTTCCTTTAGCTTATCTAGAATTTCATTTCATCCCTATCCATATATATXXXXXXXXXXTAGTGACATTTTTAACATACAAACTAGATTCTCTTTACCTCTTACCTCAAGTTACTCAAGTTGTTCCATGTAGATTTCCTCCTCTAAGTCACCATGCAAT
>Marker230890	AAATGATTTTATTAATTCCTTTTGTCTAATTATAATCTTCCTTGGGGGCATGACAAAATGCTAAATTGGAGGAAAGCTAAAAATAATGTGGGCTAAAATAXXXXXXXXXXCACTTTGACATTTTTAATCCCTTTGATAGGTGTGTGTCTACTTTACACAGGCACCAATATACTATAAAACAAGCTTTGAACTTGCATTTTGGATTTCCTT
>Marker232191	ACATAAGATTCGGTTAATTCAATCAAGGAAGTTTTGGAAAAGCAAGTGTTGGATGCACCTGAGCTTCTGCAAGGACCAATAAACTTGGCCTCAATGTCTAXXXXXXXXXXAAGAGATTAGCTGAGTTGAAGATCATGTTAGTTAATGATAAAACTCTATTAGATAATGGAATAAAAAGCATACAAAGTGCCATCAAAGAAGCTTGTGATT
>Marker590137	ACCAAAAATTCATTAGAGGTTATGTAGTGATTGCACAATCCATAGAAGATTTGTTAAAGAACAAAGGCAATACATTTTTTTAATGGAAAAAGTAGTTTCAXXXXXXXXXXTAAATTTAGACACTACTTTTTGTCTACTCCTTTTGCATTCTTCATAGACTATGAGCCTTCTAAATATTTAATGAATAGACCAATCATCCATGGGAGGATT
>Marker234847	TATACAAATAAGTCTCATTTTGAAGTAGGTCTTAGTTTCTTGCCTCCTAATCTATTTGATGTTATTAGGAGGCCAATTCATAAATGTAGAGGATTGAGAAXXXXXXXXXXATATGCATATTCAGATTGAAATGTGGAGAACTTGCTTTTTAGTGAGCAATTCTATGCTAGACAATGGAGGAGGCCCATTGTTTCCTTTCATTAAAGACTT
>Marker232651	TCTTTGGATTCCATAGTTGGCTTAATACTGACGTCCTGCAATTCCTGCTCTAGCTCTATAGTTTTACTAAGAGCTGAATTAAGTTATAAATCCTATTTCTXXXXXXXXXXGTATATATATTTCCTGTTGCTGTTTGGATATTTGATGCTCATTTTGTTGGAGTTTATTTTTCAACTGTTCTATTTCCTCCCTTAATCCTTTGTAATGTGC
>Marker201919	CAAATTGCAATTTATTAAACTCCAATTTGTCAACGCTAAAATCTTTTTATCTTTCAACCTAAAAAATAAGAAAATCTTATAGTTAACTTAAAAAGATTTAXXXXXXXXXXACATGCAAATATATCATAAAAAAATGAAGAGACATTTTTAAAATATATTGTTTGGTAGCTTCACATATATACCTAATACGGATGGAAAAGCATCTTAAAA
>Marker588887	CAGTAGAGCATGAAATTGTGTGCAAGCACAATTTATGATGCTACATTTAGCCCCCACTTTACTAGGTGTATGCTACCACATGCATATGCAAGCTAAAGTAXXXXXXXXXXTTATTCACTAATTTTTAAACCCTAATTACACAATGTGACTATAATAGACTGATTTTAGAGATAGATACAGACAAGTATATCATAGAAATACAGAGAATAA
>Marker259617	ATATTGGGTTGAAAGTGCATATTACCATAAAAACTCTTTAAAAATCTTACTTGCACAGGATCATCAAATACCTGATTATTCTCTAATAAAGATGTGGAAAXXXXXXXXXXAAAGATGCTAACAAATGGAGAAATCATTGTGAATGTAATGATTCTCCTCTTCGTTTGAGAGGTCCAGCTCCCTTGTATGATGGGATTTTTTGTATTTCTG
>Marker568658	AAAAAAAATTCCCACCTCAGGAGCAACATAGTTGGGGGTTCCACATGTAGTATGCAGCAGTCCATCTTCCTGCAAGGATATGACATCCATTCTTTCAACAXXXXXXXXXXCAAGTAGGACAACAATGCAGATGCCAAAGTCTTAGCCCAGTATCCTGATTTCCTATGTCTTGTGGCCTGCCTCAGTTAAGAGAAGAAAGATGGCCAGGTG
>Marker417591	TGTGAAGGAAAAATGATGAATTAATCATGTTATGTTTTATTTTAGATGATGTGAATGTATGAAAATCATTAATAATATGTTTTTGTTCTCAATGCTTGAAXXXXXXXXXXTCACAGATTATTTGTGAGGATGTTTGAGTATTTTGAGCCCATCCTTAGGTGTTCATTTGAGGGATTGAATATGTTGGGGATGAACTTTAGTATTGGATTT
>Marker333647	ATGTCCCATGTGTCATTCTTCATCAACACAACCATCTCCTCATCCATAGCCACTCTCCAAGGCTTAGAATCACTTGTATTCATCACCTCCTTCATAATTCXXXXXXXXXXCACATCCTCTACTAGTTACAATACTATGGAAGAAAGCTTAATTTCTCTAAAATCACACTTCTTCTATACAAAACTCTCTCAACCATAGGGACCCAAAGCT
>Marker323426	ACAATATTAAATATTCAAATTATTACATTTCTAGCACCAATAGCCTCCTAGCACAAATAACATGTTATGTCCTTAGAACATTTATACAAAGAAAGATAATXXXXXXXXXXCATGTTAGTTCTAAAAATTGGAATTCTAATTTCTATGATCTCTTAACGATCTAATTTAATACATTACACACAACTTGTGTCAATCCAAAGATATTGTTTG
>Marker312829	TGGAAAATCATGCACTTTAAAAAATGGGACCCAAAAGGAGTCCGTACGCCCAAGATATGGCCCATCGAAGTTCCCAAAACAAGAACTACACAACAACAAAXXXXXXXXXXCTCTAGAAGTAGTTATCCACCAAATAAATTTAGAGAAAACAACCAAATATAGGGCCCATGCTAAAAAAGCCACCAATGGATGGGAACGAATCATGAGACA
>Marker194828	AGCTAAGAAAAGCCAAGAGTCTAGTAGTCTTTAGGATCATTTTCTATCTAGGGATCCTAGTTCTTTCCCATTTATCATTTACCCTGAGTCTATCTTGCTTXXXXXXXXXXGTAGCCATATTGTTTGTTCCACCTGAATACATGCTATCATAGAAAATCAAAAGCAATAAAACATGTCATAACATCATGGCATTCATAGCACTTAGAACAT
>Marker224411	AGAGGATTAGGGATAATTTTTTCATTCACTATGGTTATGATTGGGAATGTTAAGGAGATTAGTGTTTTATCTTTTTTGACTACTTGGCAATATTTGAATGXXXXXXXXXXTTTAATGGCTAAGTTCAAATTTGGGAGATTGAAGTAGTTAACTTGGATCACATATAGAAAATATTTGCTATAGATATTCAATCCAAATCCATTGTCCACT
>Marker136713	ACTTGATGCGCCATTTTTATATTCAACTATCAGATTCGTTGAGTAGTGTCATTAGGGTCACTCATATAGTTTTTTGTCTCTTTGATCATGATCTTCATCTXXXXXXXXXXCCATCCTTCCTTCACTATGCTTCTTTGCATGTTTTCTCTCTTTTGGGGAGGAGTTTTTCCCATGAGGATTTCTCATTTTCTCTATTTGTGAGAAATTGTT
>Marker353514	ATAGTGGTATGGGTTTGAAAATTAGGTTCTTTCATGGTTGGGACAACAGTGCATCTCCAAATCCCCATGTTTCCATGATACCTCTAGCTGATCTCCACATXXXXXXXXXXTTCCTTACAATAAACACACAATCAATACTAAGTCCACCATAGATTAACCCACATCAACCCTCAAGTGATTATGACATCATGTATGCAATGGAACAATGGT
>Marker364280	TGTCATAAATTCAAAACAACATACACATTGGCATATATTAGTTTCCTTAAATGGAAATAACGAGGTCATCTCTACATCAAATTCAATTTAGCTTAAGATTXXXXXXXXXXTTCAGGCTTTATTGTGCTATATATTCCCAAAGTTTAAAACCTGTTTAGTATTAATTTATTAAAGTGGTTTCTTCAAATGAAAGGCAACATAAATTACCAG
>Marker263541	ACATTTTGTTACATTCTTGAATTTGCTTTTGTCTTGATAGAAAAAGACAAAATATAGCCTTTAAATACATTGAATCTAGACAAAATGAATACCCATTTGGXXXXXXXXXXGGAAAACAGAGCTGGAATTGCACCCAAAACAGTGTATATTCTAGCAATCTCTGACAACCATTTGATCTTCTGATTTTCTCCTAGTTCTAGGAGTCTTCCT
>Marker384983	ATTCTTTTTTAAACTGTTTGTCTGTCCACTCACCATTATCATCGAAGAACCCGGAGGCTTTAATTTTATTCAGTTTCTATATAAATTTTAAATTTATTTCXXXXXXXXXXTTTCAGTTTAGAGAAAAGACAACAAGTAAAGGCCAAGGAGATAAAAACAAAACCAATGAAATGCCAAACAAGACAAACAAGAACATGGGAACTTGGAAAC
>Marker560977	TGCAAGCCTATTTTCGACAAAATCAATGAAGCGAGTAAAATTTGTGTAAGTAGTGGTCATTGAATTTGGTCCATACAATGTTAATGTCATTAGCAATTATXXXXXXXXXXTCAACATATTCTCTTATGATGAAGGAATGGGAATGTTGAGTCTATGGGAAGTGAGCATAGGCAAAAACTCGATTGAGATATGTCACGTCATTATCCATAT
>Marker351864	AAAGGAGTGTATTCCCATATCTTTTAAGAGAATGGGATATGATGGCAAAGGGCTTGGCTAGGAAGTCCAAGAAATGAAGAACCTTATTGAGGCTAAAGCAXXXXXXXXXXTAGCCATTTGTTAGTTAAACAAAAGATTTTGGCAAGCATAAGGGAAGCCTTACAAAAAGGAATGCACACAATCCTTTCAAATTTACTGTTTTATCTTTTA
>Marker362139	AACACAACACAATACTTCTCTGCAACACAATCAAAGCCTTGAATATCCTTAGCACAAGATCACAAGTTCACATTATCCATCTCTAGTTAAAATGAAGTCCXXXXXXXXXXGGACCTAGGAGCTAAACTTAGGAGGTAAAAGTCCTAGGGGACATTTTATGACATAACAAGCACATTTTATGACATTTCATGCTAGGACCAAGCACATTGA
>Marker457187	CAAGGTGCTGACACATGGCAAAACTATGTCAAGTCAACGTGGGTTCCTACAACATAGTGTTGAATAAATAAATACAACGTTAAGAACTTGCAAAGGTTGAXXXXXXXXXXTTTCTAGACAATCACTTTGAGAAATTAATATGCTATCCAAATCAACCAATAAGATTTGAGAAGTAAAAGCTTGAAATTTAGTATAAGTATCAAGAGGAAT
>Marker625333	ACAATGCAATGAAAAATATGAAATTACAAGATGGAAGAAATAAATTTAGAGTGCAAACTGCATTTTTATTTTTATTTTTAATACCCACAACAACCAAGAGXXXXXXXXXXCATATTTTCTAAAAGATGGTAGCAAAAGCACTTTGAGCTCTTCTCATTCAATGTTCGCAAAGCGGCTCTTTCAAGGATAATTCTTACAAACTGTCCTGTA
>Marker146960	TCAAGAATGTCAGATAGATGATATGCATACACCTATGGAAATCATGTAATATGATCATATATTTATTTCTTCAATGCCACATACAATGTCTCTTAAATAAXXXXXXXXXXTCTTAATTATCATCTTCCCATGACTTTATCACTTTCTTTATGATATTTATACTGTGTATGGCTTATTTAGGCATATTACATGGTGTATTTAAATTTATTT
>Marker741212	AAAATAAAAGTTAACAAATTTGGAGAACAAGGATGTGAAATCTATCTTCATTGAATATAGTTATGGTTTGGAAGAATACAATCTTTGGGACCCTATTGCAXXXXXXXXXXGCATAGAAAACTACCTAAAAGGTATTCACCTGATGACTGGAGATATATCCTTACTTTGAATACTAACATAGATGAACCCATATCCATAGAAGAGGCATTA
>Marker147693	CTTTTACAAGTTGAAATTGTTTGCAAGGTTGCGAAAATTTTGACTTGCCAGAAGGGGACATTACATAGGCCAACAAAATCTATTCAGTTTGATGGTGACCXXXXXXXXXXCATTCCATTCATAAAGTCCTTTGAGAGTTTGAGAAGGTAGCCTTATACTTATCTTCCTCAATTTTTACTTGCCAAAAATCAGATTTGCATTCAAATTTAT
>Marker353647	GTGTGTCTATGATTTTAGGATAGTATCAAACTCTAATGCCCTATGATAATTACTTGAATTACCTTGAACTCTCACATTTAGGAGAATCCTTAAATCTAACXXXXXXXXXXATGAAAACATGATGTTAATGAATTCAATGTGTTTTGGCTACTTGGTAGGAATTTGCTCAAAGAATTTCACTTACTTTAAGGGGTCTCTACCTTTCATGTA
>Marker208819	TGCCCATTAATTTGAGATAGCAAATCTTCTACCTTGTCTACTATGTCATGGGCATCAGTCATTTTCCTCATCTTATTAGCTTCACTGATTAGGCCCGTCAXXXXXXXXXXGCAAAATTGATACAATGTATTTGCATCATTAATGGCAGTCTCAACATTCTTAATGTTGCTATCTAACAAGATTTGTGCTTCAGAGCACTTATCAGATAGT
>Marker294705	ACTCTATTTACAATGGAATCAAAAATCAAATATAACTTTTGTGGACATCTGAAAATGGTCACAACCACTTTCATCCACCTACACAATCTAACCCTATTTCXXXXXXXXXXAATCATCATTATTTTCTTCTAAAACATTTGCACATGAATTAATTTTAATTAATTCCTCATTACAAACCCCCATGTTTCTAGAAGTCTATTTGTCATCTTA
>Marker461511	TGATAAAACTTCTCATCTGCAACAAGCTGCCCTATACCCAAGAGGGTTTTTTCAGTCTGATGAAATTGTATTTCCCAAGTGTATATGATGTGAAGCATATXXXXXXXXXXGTCCACTGTATATTGTAATTACAACAATAATCGATTAAGATCTATTGATTCTTTTGGCTAACTTGCGGTCTGGTTGGATACACACGATGAAACACTTAAA
>Marker446927	ATAACCAGCAACTTAGCGATTGTAAGATCCCTTACAAGATCTGCCCTAAATTCTGAATTTTATTTTCTGATTTCTGCCCTAGATTTCTGCACTTTAGTATXXXXXXXXXXATCAGAATGTGAAGTCTGAATATTACATCCAAAACATGGGCTCAACATGATAAAACATGCCCGGAATGCTGCTGTCCAAATCAGACCTAATACATAGGTT
>Marker247790	TGATTGATAATGGATCAACTCTTAATGTTTGTAGCATCAATCTATTGCATAAGATTAAAATTGACACATCTTTTATCAAATCAGATAGGATAAGTATCCAXXXXXXXXXXATCTTTGTTTACAAATTGAGTTGCAAAAGCAAATTGTTCAACATAAGATCTTAAAAAATTTGAAGGTTGACTTATCAACCCCTCTTGCTATAGATAATGT
>Marker548538	GTCCAAACCAGTAGCTGGAATAGGATCACAATCCATAAGATCATCTTCAGTTTCATTGTTCTCCAACCATCCACCATTCCAATCAATATCTGTCCCCCATXXXXXXXXXXCATTTCACATTTCAAATAAAATTTCACACCAAGAAATATTATTTCTGCTATCCCACCCCAACCTATCACCTAACAAAATAGATCAGCAACATTTAACAAT
>Marker486361	AAACATTTAAAATGCACAGAAGTATTCAATCTAAATGTATAATTACAGGCCTGGTTGGATTAAAATTTCTTTGTAATCTGTTTCCTTGTAGTAGTTGTCTXXXXXXXXXXAGTGTGCAGATTATTTTCCGGCAGAAGAAGAATCATCCCGAACATTTGGAAGAATATCAGTGACTAACACGAGTTTGAAAATAAGTCCTAACTCAATAGC
>Marker361983	TCTACAAAATATGTAGGGTCTAATAAAATAATAAATTAAATTTGAAATATAAAAATGTTGAAATTGACAAGTGATCAAGTAAATGAATGTGAAGTTAGAGXXXXXXXXXXCTACTTTTGAAACTAGCATGGCACTAATAAGCACCTTTGAGATTTGTTATGAGAGAGTTGAAGTATGAAATTTCTTCAACTTTGACTTAGACTGCTTTGT
>Marker405432	TCAAGATGATGACTTTTTTGATAGGGGAGGATTTATGGGAAATTGTAGAAATAGTATATGAAGAGCCAGCTGATTGGACAACCCTTGCAACCAATGATATXXXXXXXXXXGATTATTGTGTAAGAGTAAAGGATGTGGTTAATAAGATGGCTACACTTGGAGAAATTGTGGACAAAGAGGTTGCGGTTAAAAAGGTGTTGAGGTCTCTAA
>Marker367726	TGGTGGTGGTTGTGGAGTTGGCCTATTTGGTGGCCTAGAGTTCTTCTAGACAACCTCTTCTTACTATTGAATGATAATACTTTCATTCTAACCGAATCTAXXXXXXXXXXCATGAGGGTGTTTCTAGATGCAAGATAGTTGTAGGTTTTCAAGTATGCTTTATGCATGGTTTGAAAAGGTTGGTTGTATCCTTCTCAATGTAAAGGTGTT
>Marker597910	ACTCCCTCTTGTCCTTGTAAAGATGCTAGGATGTCCCCATGCACTAGAAGGTCCTAGAAGTGGAATTAGAAGGAGAAACATTGGACTGTTTGCTTCAAATXXXXXXXXXXCCTAATCCTTATGGATCACAGCTCCCTTTTTAGAGAGGCTTGTGGTCCCACAAAAGCTTAATGAGACCTTAAGAAAAGAGCTTCCCCACCTCCTCCTTCG
>Marker510948	AACTCACTCCTTTCCTTGCTTTCTTTCTATTGTGAACTTATGATTGAATTTTAATTATTTAATTTGGTTGAATTATCTCTTTAATTTTCTTATTTATTTCXXXXXXXXXXATCTTTTAGGACTATCAGCTTTTGTGGAGCAATCGAATAGTTTAGTTTGGATTATGGAAAATATTTATACATGGAGGAAGTGACTAACCATGTATGCACG
>Marker93677	AGAATGGTGGCCAGGTATTTCTATTTGATGCAGTAGCTTGTTGAGTTCTTCCCCTTGACCTCGCATGACCGAGACTTGGAGTAGCTTAGGTCTTGATGAGXXXXXXXXXXAATCATCATAACAAAATAAGGTGGGCAGCAGTTTCATGAATGGGTTCCAGGCTATTCCAACTGATCACGTTCTTTGCACTTCACAAGCTAATTAGATAGG
>Marker643529	AAAAACTAAGATGGACCATCTCAATGCCTCATTCATTGGGTGCATAAAATTGGTTGGAGCATTGCTCAATTCAAATGGAAGAATTAACCACTCGAAGAGAXXXXXXXXXXAATGGGAGAACCACAAGGGGACATGTTGGGCCTTATCACCCTTTCTCTAAAAGTTTCTTTAATTGATCTTTAAGTTAATTTGAATCTATCACACTTTGAG
>Marker336617	TTATGTGTGGGTCATACATTATATATCTTGTATATCTTGTATCTTATATGCATCATTATCATTCTTTGGAATTATACCATTGTTATTTCTTCAGTCTTGTXXXXXXXXXXGTGGAAATCACATTGTAATCTTAAGTAGGATATTGTCATTATTGTTGTGTATTTTGTAGGGTTTGGTGTGGATTAGATCAGAGTTTTTTTAGTTTTCTAT
>Marker554984	ATCTTGGCATTCCTTTTTTGCAGTCCTCATCACATGTTCATTGTTCTTTATCTTTATATATATTATATGGTATCCTCCCTTACCCACTTGTCATTTTTTTXXXXXXXXXXGGAAAAAAATAGAATAAAATCAACAATAAATTAATCAACTTGCTTTAGCATCAATGAGCCACTTTAAACATCCTTACCCTTTAGTATGGATGGAAGTATT
>Marker601835	GTTTATCTTTTATTTTTATTTTTGTTGTAACATTTGGACTGCTAGCTAAGAAGTTATTGCCTTAGAAATATTAATTTAATTTGTTATATGTTGAATCCTAXXXXXXXXXXAATTGTAATTTAATTTTATAAAGTATTTTTACTTTATAAAATTATTAGTTTTATTAAGTTACTTAAGTCATTTAAAACACTTTATTAATTAAAGTGTTAT
>Marker360041	CACAATGCTCCAAAGAAAGTTTACATAGGTAAGCACTTGAAACCACACATTAGGGTAATGTTAATAGCATTACTAATAAAATACAAACATGTCTTTGTCTXXXXXXXXXXATGTTTTCTCTGAAGGATAATTACCCATTGCCCAGCATGGAAGCTATGTTGCAAAAGGTGACAGGGTGTGAAATTTTGTCTATGATGGATGGATTTTCAG
>Marker703216	AACCATTAATTAAAAAATCAATGCTGGCAAATTCATGGCTTTTTTTGCAGGACAGTCAAGGCATGTTTGGGCTTTGCAAACTAGAAGAGACAAAATCCTTXXXXXXXXXXTAGATTTCTTGGCTACCATAAGATTACAGATCTGACCTGGAAGCTCACATGATGGGTAAATCACCTAATTTTTCGGCAAAGACCAGGCTTATGAGAGACC
>Marker319477	TTTTGTTTGGTGTTGTTTTTATTTTGTTCTTTTTGTTTTTGTTATGTTGTGTTTGTTGGTGTGGTGTGTTGTCTTAGTAGGGATGTTTGTTTTGTTTTGAXXXXXXXXXXTGTAGATATTATGTGAAAAATTAGAGGTCACCCTTGCTACCATTACAATTCTCAGCTTAATTTCAGCAAGTGATCATTCCTTGCATCATGAAGTTACAAC
>Marker706412	TTGTAGATCCTTAATCATTAAAGTTGAATTGACAAAATTAACAAAATTTAATTGCTTTCATAATTCATTGCCAATGTGCATATGATATACTAAATGTTATXXXXXXXXXXACTCCATCAACATGTTGCATCTTCACACAACAAACACATGGAATCTCCCAACTTTCTGAGTTCATTGTATAATCCCAATGATTTCTTCCTTGGATGGCAT
>Marker493510	TATATCTTCTTGCTATTTTATTTGTTCTATTTTTTTTACTAATAGTATATCATAGTGTAACAACCCACACCAATTTTTTTGATTTTTTACAATATATATAXXXXXXXXXXATCAAATTAATGCCAAAACGGGCTATGAATAAATGCAATTAACTGGCGGTAAACCATCCAGTTTTACAATATTATGAGTATGAAATGCATAACTTCCGGC
>Marker296826	GAGTGCAAAAGTGAAGGTCACACCAAAGGTAATTGTCCTAGAAAAATGTTTTGTGATATTTGCCAGGTTATGGGTCATTTAATAAAAGAGTGCCCATATAXXXXXXXXXXGAAGCGAAAGGCCAGCATCAACATGATTGATGTAGAGATGCATAATGAAGTGTTGGCCATTACTCAAGCCCAAGCAAAGAAGTTTGTGTATCCGGATCCA
>Marker305707	TCTCCATACTCACCAGCTTCATCAATGAATCTATAACATTCACTAAAGTGTCCACCTTATTGATAATCACTCTTATTCTCTACCATGTTTCAAATAAAATXXXXXXXXXXTATTGTGAATATCACCAACCCAATCTACATCAATGAAACCCTATGTATTTAGGTCCTTTCCCAAATTAGGTCTTACTTGGTAGAAAATAGATTACTTTGG
>Marker315388	ACTTGACACTCATCACCAAACACTATTCATTAACCAAGGATTTATGATCTTATAGTAACCAAGCAATCCTATAAGGACATGGATACACTATTCTCTTCAAXXXXXXXXXXTGATAGTCATATGTTCCATGGCCTTCTTCACTACATATGAAATAGGTTCCTCTAAATCCTTCTCTTCCAGGCTCTTTTCTGAATCTATCTCTTCCTCTCT
>Marker342111	ACTGATACCTGCCCTTTGCTGAATAATCCAGGCTTCCAAAACCACTGTTGCAACTATAGGTAGTTTGTTCAGCTGAATTGTCCTCATTCTAATTGTTTTGXXXXXXXXXXTTTGGTTTTGCTAGGTTGGTTGTGCTTGGGACTTATAATATTTTCTATATATTTGCTACTTTTATTTGAAAGTGTGGAGTGATGAGTGAAGTTATTAATG
>Marker218508	TAACTCTTCGGCTCCACATATGTATATAAAGTGAAATCATCTTTCAATATACACTAAGGTATGATGCATCACTTATATCATATTTTAATTCTTTTTTGACXXXXXXXXXXTATGCATACAAGTATGATGATTCATAACCTGAAACATACACTTAATACTATGACTCGACATACAAACGACCTTGTATATGCAACATACAAACCTTCCTAT
>Marker266294	GAATTAACTCCAAGCGGCTAGGAGATCAATCCAAGCGGCTGGGAGATCTAACAACCTCTAATGGCCTAACAACCTCCTAACTTCCTAACAAACTTTGTGAXXXXXXXXXXCCATGATCTTTGAACTACAACTTGCTTCTTTGGAATCAAAGACTCATGCCTAGTAGTGTAGGCCCTAATACCTGCATTGTAGAGCCTAATGAATGCTCCT
>Marker351239	TTTTGTCTAATGGCATCCTCCTATTTCCAATAAAAAATTAGATCATCTATATACAAAACAACAATCAAAATCTCACCTTGAGTTACTTTGATGTAGAGTAXXXXXXXXXXTTCCATTTGTGTTGGGTTGTTATTGCTATGACTGCCCAGACTATTTCCAGCCTTGCAACTGGTGCATATGTCTCATCATAATCTCTTCTAGGCTATTGTT
>Marker351737	TTTAAAAATCTAATAACATTAAGGTTTCCATCTTGAATTTCTTTTGCTTATGTGTTCTATTTTTTAGAAAACCTATGTCTAGTATTTTTGGTGTCATTTTXXXXXXXXXXCCACCAAAGAGATTTTTGATATACTTAAAAAATTCAACATTTTAGGAGAAGCACACCAAGTGCTATGTTATATTTTTTTGACAAAATCAGGAGCACTTTG
>Marker432838	TCAACTCGAGACCCTTTGAGGCAAGGGCTGGTTACAAATCACAGATTGAAGAATTTTTTCAATTGCAATTCAGCTACAAACCTCAGAATTGTTAAAGCCAXXXXXXXXXXTGAAGAATGAGGAGATAGAGTTCTGGCTGAAACATATGAGGATGGATATCAAGGATTTGCAGATAAATGCAGAGATTTTAGAGAATTTCATGCAAGTATG
>Marker680769	GCTCCCCTCGTGTTTTCACTTCTAGAAGCAATTATCAGTGCGCTAGTAAGGGCATCAAGTTCTTGTATGGTGAAATGGCCCCTTTTCAAAAATTCAATCTXXXXXXXXXXGCTATTTCCCTCAGTGGTTTTGCGCATAGGACCCCCTTCTGTCTTTCCAACTGTTTGCTCTGTCCCACCACCATGGTTAACATATTGATCAGGATGTAAC
>Marker416129	TTCACCTTGGCTTGTTTCTTTTCTTCCATAAGTGGCATGTTGGGGGATGAGAGGAGTTCTTACTTGAGATGGTGGTCACTTTGACTTTATTGTAGGTATCXXXXXXXXXXATTTGGGTTCACTTGCAAAGTTGTATTGTAACATTGGTTATATATTTTATATGTTTTTTTTTCACTAAAAGAGGGGTAAAAATTTATTCAAACAAGAAAA
>Marker386448	TCATTTTTGTAGGATGCCTCCCCGACGAGTTCGGTGAGTGTAGTCTCACCGCACTCCATCCCCCAAGATTCACACTGAGTCTTCAGCTGAGGGACAAGATXXXXXXXXXXATGTGGAGCCTTATGTTGAGATGCCAGAGACAGGGGAGGTTGGTTTGGCCGACAGGACCCGTAGCAGGAGCCCTTCACATCATGCTAGGTATGATGAGGT
>Marker390816	AGAAGTTATAGGACTAACAAAATCCATTGTTTGTTAGGTAACCCTAATAAAGGTGGTATGGACCACAAGTGCTACACCAAATGATGTAGGGAGCATACCAXXXXXXXXXXGATACACAAAGGCTTGTGTAAGCATGACATGATGCCAAGCAATGTAACTAGGTGTTACATAAGACAAGCGACATCAAAAGTAAAAATATGAAGGGATCTA
>Marker265880	CCTAACAATTTCCTTCTCCATCTCCCTCTGCCTTGTTTGTATGAGAGAGGGCCTACCTTTGCTATTTTCCCCCCAACATTCGTAGTCTTCTTGCTATTACXXXXXXXXXXTCTTCAGTTCTACCACTCAGGTCTTGCATCTGGCTGTTAGTGCCCACCTTAGCCATTGGGTTCTCCCCACTGGACACCAGTCCCTAGTCATCCCCCTAAG
>Marker626929	ATCTGGCTCGCAGAGTAAGGAGTTGAATGAATAATCCGATATGGACAGAGGAGGAAATCCGTTGTCAGATACACCCATCTTCTGTTTATTTGCTGCAAATXXXXXXXXXXAAACTTCCTCTCAGGTTCATCCGACTCGCGAATCCTGCACTGTCACGTAAAAGCAACATTATTTGGATGAAAAGTGAATATTTAGATAGAAGGTTAAAGT
>Marker392230	AGAATCAAACATTATTTTTCTCAACCTTATATCTGTAAGTGGGTCCTTTTTTACTGTGTGCACTCTATGTTTATAAATTATAAGAGGAGCAGCCGCCTCAXXXXXXXXXXTTTACCAACAGCCAGGCCGTGTTGTGAATCCTCTCTTCCTCAAATAATTCACTAAAACTGCCAACATTCACGCTGTTAATTTGCTGCATACGGATATACT
>Marker731946	TAAGGGGGTGTTGGTGTGAAAGGGGTTATTCCCTAATAGGTTTCCTTTTGAGTTCTTTTGACATTTAATTTATTAAGTTTACTTAGGACATTTACTTTTTXXXXXXXXXXGGTGCAGTCTCACCAATAACTATGAGATTCAACTTAGGTGGAGTTGCCCCACCAATGGAATATGAACCAATGTTTTATTTTTGCAATAATCGTTGATAAT
>Marker275522	ACTTTTTGCAAGCCTTAACATAACATCAAAATGAGTCCATTCAAATGATAAGCAAACTCTTAATAAAGATATGAAGACCATGATCTCCAATCACTTGTAGXXXXXXXXXXTTTCTCACAAGCATTAGCAACATGCAATGTCATAATTAAACACATTCTCACAAAGTATCAACTATGTTTGGAGACCCTGATTCAATGATGACATCAATGA
>Marker328349	TTTTATCTATGTGGTGGGTATGTGCATTAGAAAAGGTGTCTCAACCTTGATCCTAATGTTAAGATTACAAATACTGTGATTTTTAGGTTATAAAATAGAAXXXXXXXXXXGTCAACCACCCAAGATCTAGGAGCTTCAATGAAAGCGCAAGAGAGACCCAACATGAAAGAATAATTCTATTGTATCAAAGAATGCAATATGCATATAGTA
>Marker648750	TCGTTGTGCATCTTGCATTGTATATCACTTTTACATCTCTCATACAAACTCAACATACAAAATGGAACTCAGACTTCACATATTAGTAAATCAAAATGAAXXXXXXXXXXTTTTGGCATATTTATTTAATATATCGAATACATACACACACATATAAAACATACACCACAGTTTATAAATTGCATTTGAAATTACCTTTCAATCCTATAT
>Marker585206	CCGGTCTTTGGTAAAAGGATTGCAACCATAATTTGGAATGAAAGTAGGGGCGATGCAGTGTGCTTCATGTTTGGTGAATTTTTGTTGATATTTGCAGTCTXXXXXXXXXXCATAGAAAGAATATCTTTCTAGAGTCGTTCCTTGCGGCATATTGTCTCTGGACAGAATTCATCAATAAGACAATTTTGAAGACAGTGCATTGGAGATCAT
>Marker302215	TACTCACCAAGGATTACCTTTTGAGAAGATATGAAAGGTAATTGATCGAATATGGAGAGGGGGGAGAACACTGCAATATAAATATGGAGGAATAAGGAGGXXXXXXXXXXATTAGCAATCATCCAATCAATAATAAGCAGCGAACATTTGGAATATAAAGAACCACTGGACTGTGGAAGATTATAAAAGCAAACTGCGATATTCACATAT
>Marker336250	TGTTGAATTTTACATGGGGAGAGACAACGTCTAAAAATTAAACTATTTTAAAACTTTTATGTGATATGCAAGTTTCTCAAAAATTTCTTTGGCAAACAATXXXXXXXXXXAATATATATTTCTATGAAATGCTCTGTGGGTGGTAATAATTTGTTGTTTGTTGTTGCTTAATATGATTTGTGGGATTCTTTGTAACATATTTTATTTTAA
>Marker464293	AAGATTATAGATAAATCAATGTAGTCTTGAATAGGTAATGGAAAAGGAACAAAAAGATAAACAAAAAAAGCAAATTGACTGACTTACAAAGTAAACATACXXXXXXXXXXGATCTGTTTCTTGGTTTAGATTGATTTAGCAAATGTTGGCAATCAAAATTTGGACATCATATGGCTCTGCACGTAGGTTTCTTTGCTTTAGGTTTGTTTA
>Marker460673	GCCAAGTTGTAACGGCCGATATGCTACCACCTTCATGTTTTCTTGCTTAAGAGTGACCTAATTCAATTGTATGAAGCATGAAAATGTTATTCTTTGAAGGXXXXXXXXXXAATGCATTATGATGTGCGACTAAAGGAGAAAGAATAGAGGTAATAGGGCCTGTCCTGATTCATCTTGAAGACATTTGTAAGATAGGAGAGAAGTGAAGAG
>Marker652908	ATTGTGATATTGCAGACAGTTGAGATCCTAGATCCACCTAGATCAATAACCATTGCTTGAGAAGCAACGGTATTAATTGCAATAAGCCAAGAAATCAACTXXXXXXXXXXATCAGATTAATATGACAAAGAATAGTTAAATAGACATGGAAACATAACACTATGTTAGAAGTGTGAAGACATATTATATTAATTCAAGATCTGCAAGTTT
>Marker366251	CATGAATTTTCATAAAAATCTAGTCACTCGCGGTTTAACTCGCCAATTTAATAGCCCGAGTTTAGCAGAAATCTTTCACGTCAAAGTTCTTTGTGGCAAGXXXXXXXXXXGGATTTTTGGTCCTTGTTTGGTGGTCTTCATTTGCTTCCGTTTCTGCGTAAGGGCTTGTCTTGGTGCTTGCACACACAAACACACACACATAAATATACT
>Marker205299	TTTCAATTTCTGGTTAGCCCTAATTTCTCAAAGATATTTGTTTTGAAGTATTTGATTACATTCACAAACGGCTACTCCAAGGGTTATAGAGGTAACAGAGXXXXXXXXXXAGAAACTTGACGTATGGCAGTGGTTCCCAAACTTTTGTTTTGATGACAAATGGATTAGGTTAGCTCTAAGTAGGTTTCATGATAAGTTTGTATGGTTAGA
>Marker386271	ATAATATGATAATAGTAATTAGTCCAATTCAGCTATTGTTGCCCTCATATGGAACTGATCCTTGCTACCCGGTTGAGCTACTTACAATGGGAAATATTACXXXXXXXXXXTATTGCACATGCCTTAATGAGCGAGGACTTATGGCCTGGCAATGTTTGAATTTTCAAAAGTTGTAACTCATCTTGAGATGCTGGATGGTAAATATTATCA
>Marker110816	TTGGACTTGGGTGCCCACTCTAGTGTCCCTGACTGTTCCACCTCAGATCCCTGAAAATAGGTATTCTGTGATTTGCTATTTTACTCTCGTCTGTAAGAGCXXXXXXXXXXCATACAAAAAACTACCAAAAACTCAACTATCCAAAATTTACCCTTTACACACTTGAGTTAGCTTCTCAAGTATAAATTCATGATCTATTTCATGTGAAAA
>Marker784185	CTTCTTGCTTGGTGGCATCCAACTTGGAGAAATGTGACTCTTGGGATTCCTTCATGACTTGGATGCTTGAAGACTCTTCATTGTCCAATCTTTGTCTTCTXXXXXXXXXXAGGTAAGAAGTTTGTGAGCATGGCTCACAAAATGGAGTTGAGTGGTTGAACCACCCTTCCAAATAATAAAATATTTGTAGCATACTCCAATGCTATGATA
>Marker438735	TTGAATTCCTTACACTGTCAGTATTGTAAGAAATGCACTCCTGGAAGCATTTGTGGGTCAAAAATAGCAATGAATCTTACGTTTACAGCAGAGTGTTAGAXXXXXXXXXXACACATTTAATTTAAGAGCACGAAGGCAACGAGAACTGAGCATAACAAAAAAATTAAATTGTTACCAATAGAAAGGTTGGGCATATATAAACTGTATCAC
>Marker318980	ATCCCTAAATAGACTATTTTAATGAACAAAGGAGGAGATGTAAGGCCCTTGAATGGACTAGTGTAACCATATTACAAATGCAAAAATATGGTGTAGGACTXXXXXXXXXXAAGCTAATTTACATGTAATAGTGTAATAGATATCATGTAACAAACATGAGATAATGTGTCAAGATATAAGCATGAAAGAACATGTAACAATAAGTAATAA
>Marker490122	ATGTTTCGGTATTGGCTGAACTCTCCATTCATTTCAGCTCCAGCTTTGGCTCCTACTCACACTTCGGCTTCGGCTGCCACTAACATCCCATACTCGTGGCXXXXXXXXXXCATCGATAGGTATTATTGACCAATGTTTCCTTTAGTTTTAAAACTCTTTTGGATGACCCAAGTTTACAGAGGCAACAGTGCCAGAATGTTTGCCATAAAT
>Marker392216	TGCACTCCGAGCTCTATGGAATGGGTTCCAAGCTCTCTGGATTGAATCTACACCCTTAAGTTTTTAGGGTAGATATAATATCCCCAAGGCCTATGATGGTXXXXXXXXXXCCTCTATTCAAACATGAAGGATTGTATGGACAAACGGCTGGATAGGTAGATAAGAGATTGTTCGGCTGAGAATAGTTAAAACTGATCTACGGTTATGATG
>Marker682277	TTCAAGAGCCTTCCATCTTCTCATTCTAGAATTTCTTGTTTAGCCATTTTTTTCCATGCTAGAATTTTATGCTACTAGAGGGGTCTACTATTGTGGGTGGXXXXXXXXXXATGGAGGGCTTGAAGATTCACAAGGTGAGTATAATGAAAAAGGAAGGAAGACTTGGAGGCCTTCCTTAAAGGAAAAGAATTTTTGGTTGTAATGCCCACT
>Marker521553	ATGTTTAGTTGAGAAAGAAAAATGCATACATGATTTCCAAGGTCTCAATTAAGAAATAAAAATCTCAAATGTCCGAGAAGTTCCAACTTTTAGCTACAAGXXXXXXXXXXAGCATAAGGGTCCCATGGAAGGTTTTAGTCCTGCTACAGTTACTGTCAAGAATCTATATGAATAACTGCTACTTGATATTTTCCAGAAAAAGTCCAAAAA
>Marker127911	TCTGCCTAGTGCAAATGGATCTTCTAGTAACTAAAAGGGAAGTATTGGCTCAGGGGGAGTTACAATTGCAAATCTTTTTCAAACCCCTGAATACATAAGAXXXXXXXXXXGCTTCAAATTGTTCAACTTGATGATGGTATCTTTATTTCTCAAGATAAGTATGTTAGAGAGATGTTGAAGAAGTTTAGTATGGAAGATTCCAAACCAGTA
>Marker365453	ATGATAGAAAGAGATCATAGGAAATAACGAGTGGGGATTTTAATTGAGATTGACCATAATCTCATTAGGTAAAATAAATTTTAATAATAAGATCTACGCCXXXXXXXXXXCCTTGTTTGGTGTGCATTGAAGGTGTGAGAATCTCCCTTATGCTTGAATTCAATAATGTCATTCTATTATGTTTGTTGGCTTGTGTAAGTCATTCATACT
>Marker631689	AAAGAAATTCAAGTCCTTCAATCAGTTCGTTGATCTGCAAGCACATACTTCTTTATGAAGATAAGGAAATAGGGGAGAATAACTCCATTGAGTCAAGCTGXXXXXXXXXXGGTGCAGGAGCTATCATCTTTAATGATTCTACGTCTTGCATTTCAAAGTCTTGGGGTTGTTTATGGAGACCTGGGCACATCCCCACTATATGTTTATAAC
>Marker438722	AAGACTACAATCAAATCAGAACCAAAAAGCAGTTTCAATCTTCAAACAAGTAGAAGGCAATAGAGTTGTGATATATTTCAAGATGGTTTTTTAGCAGAAAXXXXXXXXXXTTCCCCACTTTATCTTGCATACAAAGGTGGATGTGCTGTAAATTCTCTCTCTCTCTCTCTACTTCAATAATTTTCTCAAGAGCACATGTTAAACAAACAA

## Sheet: LG5
>Marker285083	TCTTTTTTAACCATTTTATCTAGTTTGCAAGATCATCTTGTCATGGTCTATATGCTTCAACTAACACTTTTGTAGGGTGATGATGATCGCCACAAGTCTAXXXXXXXXXXATGTAACTTCTTATAGAGAACATTAGTAATTAATAAATTCATTATGAAATCATAACACTATAATTAGGGTTAGTTACATCATAAACATAATCAATATTAA
>Marker94464	ATTGTCCTATCACATTTCAGACCAATCTTACTACCTTCACACTATTCTTCTACTTTTCTTTGCACAATGCAAACAACAACACTCCTTCACATCCAAATCCXXXXXXXXXXTCCTCTGTCTACCCTACCAAACAGGGACCCAATGCTTAGGTTCTCATATCTCTTCAATCTTTCTTCACCGGAGGCTCAATCCTTGGAATCTATCAATCAA
>Marker29217	TGAGGAAAATGTTGTGGACAGATCTCCTAATATTGGCACATGAGATATGGGGGTCAAAAATGAGGAATGCATGGGGAGTTCGAGCAACAATAATTCTAATXXXXXXXXXXTGTGCATACATCTATTTTGATAGGGGAAGTGTGTGATGATAATGACAAATTAATAGCCTCAAGTATTTCATTTGAGCCATCCTGTGTGTCTCATAACAAT
>Marker59477	GCGTTTGGAAAATAAAATAGATTTAGGTCTAATCCTGATAGAAATTGGTTCAAGAGCACCTAATGGACTTTATGCCTCCATGAGGCCATTTTGTAAATATXXXXXXXXXXAGGTTGAAACCAAGGTGGGTTATTACATTCTGAAGTGAAATCAATAAAAGACATCCTTGTTTCTATAATTTTTGAATGTTAAATTACTGTTGCAAAGCTT
>Marker230754	TGCTTTATGAGCTTTGCGACCTAGTGCCCTGATTCTAATACCTTTGTGTGAAGAAGTCTTAAAATTATGGGTGCTAATGTTGGTGCATCCAAATATGAAAXXXXXXXXXXCCTAGCTAACATAGTGCATAATAACATTATGTCGGCATCTAGTTGTGTTGAACTCATGATGAATGTGACTTCTCCCTAATCAAATAGGGACTCAAGTGTC
>Marker27058	CAAGATTCTTTTTTCCTAACTTTTGAGACAAAGTTTCTTTCATGGTAAAGAAACAATTAGTTATAAGACCTTAGTTTTTTCCCCTACATGATAAAATGTTXXXXXXXXXXAAACCAAATCAGGTCGCTTGTATCTAGGTTGCAATCTAATGTTCATCATACTACCACAAAATGCCAAATTGTTCAGTCCTCCATCATTCCCTTTGACACC
>Marker74426	TTTCTTGAGCTTTAGACCTTTGTCTATGTGATCCTTTGCTTTCTCCAATTCTTTTCTCATAGAGACAATTTATTCTTCAAGTTTGGAGCATTCAACATATXXXXXXXXXXAACAATACTTCAATTCCCATGTGTTCCACTCCAAGATCTACATTAGTTGTTAGATTGTATCAAGGAACCTTGCTCTGATACCAATTGTTGAACACATAGA
>Marker395316	TTCATTTCCAGCCCTGTATTTTCATGGACAGCAAATGGGTATGTTGAAACCCTAGTATTTTTGAGCATATTTTATATGGGTATTGTTTCTATATGCTTTGXXXXXXXXXXTCGAGGACTTGGGTGATGTCTTTTGTTTTGTTGTTTGAAGCGCTAGGAAAGCCCATTCATAGAGTAAACAAATAAGAAAGATCCATTGTTGTTTGAAAAG
>Marker266066	GACATTATTCCATTAAATGACCCTATCAAAGGCATATTCATCAAGCTTCCCTAGAAAGTTGAAGTGGAAAGATCGCCACCTTGTTTCTACATCCTAAGAAXXXXXXXXXXATTTACTTTTATGTAATTTATCTTGCATATGCATGTAGTGCCATACACCCGCTAGGGTGGGAGCTAAATGTTAGTAGTGTCGTAAATTGTGTTCCTTAAT
>Marker46574	GCGTGTCACTATATTATGTTAAGCTTGAAAGGTGCCGATATATATTATTGGTCCCACAAGGTATCCTACATTTTCTAAGGTGATGTGGGAAGTGACAAGTXXXXXXXXXXCCACATGTTGCAATAGAACTATGAGTTATAGTGCCACATATTTTATCGCTCAACCAATGGGCGCATAGGGAGAGACAGTTGCAAATTTGAGGAGATTTTT
>Marker496102	CTAATCCATTGAACGTTCTTTTTTCCTACAGTAAAACAATATCCACTCAAGCCCTAATAATCTATGACTTGATAAAGCATCATTTGTTAAGGTCATTAATXXXXXXXXXXTACATCTTGTAATGAATGCAATGAGCCACATTATGTGCAAGATGATGATGTTAATATGATGTCCATAGGCAATGGATACACTCTTTATGATGCTGATGAG
>Marker78199	CTAGTTGCCAATTAAAACCTCTTTTCATCTTGAGAGCATTTTCAATGATTAGGGAGTCCCCTTCCACACATAAATTGTAGACACCCCACTTATGTGCTAAXXXXXXXXXXCAACTTTCTTTAGATTAGAAAAGAAAAATGAGGGTGGATGACTCATATATTTCCAAGTTTTTAGCATGAGAGAATCCCAGTTAGAGAAGGACAGATTTTC
>Marker142448	AGTGATGCCACACAAGTGATGGAAGAACTAGCAAACCTAAAAATTTACATCATGCTTCATTTTAATACCACCCTGGATGGTATGCAAGCTAGTAAAAAGAXXXXXXXXXXTCATTCAAGGGGCCTTACGTTGATCAGTAAATTCCATCTCCTGTAAAGATGCTACACAGAAAGGTTACTCTACATAGTGTATTTCTTCAAATAATGTGTC
>Marker119317	CAATGTGCCTAGTGTGGATACCACTGCACGATGCTAGAAGGGCAAAGGAATGGCAGCAACAAGAGGGTCAATAAGAGGTTGAACTTGGGGATCAACCCATXXXXXXXXXXGGTTCATTTGAAATGGGATGTCTAAAATATTGTGCTAAATGACCTTTTGTGATTTTAAGATCTAAAATATCCTTATAGGAGAGGCCATCAGCATAAAATT
>Marker137934	GTTATGCTATTAGATTGACTCCAGACATGAGTGTCAAAGACCATTGAAGCTTGTATTGCAAGTGTATTGTAAACAACTTTCAGATTTGTTAATACATTGTXXXXXXXXXXCCTTGCCAAGGTTTCCAAAAATTTATCATACTTACTGAGTCCTCCCTCAATATTTTAGTTTCTTGGAAGAGGATCAAATTTGGTTTTCTCACATTTATAT
>Marker458481	TCAATTTTCTTACCAATCCAATTCTCAACAAGAGCCTTAAAATCCTTAAACTTGAGAAACACCTCAGACTTCCTCCTAAAAAAATACACCCAAGAATACCXXXXXXXXXXCCTTTCTTGCTCAAGTGACCCAACCTACAATGCCACAACTCTGATTCAAATGTAGTTACATTAGCACACCTAGATAATATTGATGCATCCAACTATATAG
>Marker120090	CATGGGCTTAGTTAATGCACCTGCAACATTCACCACAGTCTCTACCTTTTCCAGCTTCACCATGCCATCCTCGACCATAGCTCCCACAAAGTGAGACTGAXXXXXXXXXXTAAGAGTAAACACATATGCACTGGTGGATCTTCTGCTATCAACATCAGTATCCTAGTCTGAATCTAAAAAGTCACAAATACTCATGGAATGTTGATCTCC
>Marker271245	AATGTTCATAAGCCCTTGCTAACAGTTGACCTATTCCTATGCATTCAGGGAAAGCTTGATCCTGTTGTTGGAAGGCAGCCGCAAATTGAGCGAGTTATTCXXXXXXXXXXACCTGTTCCTCAATTAAGTCCCTGCTAGAGTTAGAGGATGCTGATAGAAAACAATCACTTGATGCAGGTTATTACTTTAGATATGGGGCTACTTGTTGCT
>Marker114211	GATGATAGGAGTATAAGTGGTGGTGCTTTCTTTCTGGGAAGTAGACTTGTCTCAAGTAAGAAGCAGGACTCAATGTCATTGTCTACTGCAAAGGCAAAGCXXXXXXXXXXCTTTACAAAGGCTCTCCCTAAGGATACTTTTGAGTCTCTATAGAAGAAGTTAGGGTTTATTTCCCCTACTTAAGGGAGAGAGTGCAGAAAAGTTAGAGTA
>Marker191139	AGTCATTATCCATTCCAAAGAGAACCATGGGATGATATTAGTATGAATTTTATGTTAGAATTGTTGAGAACATAGGGAAGAGTTGATTAAATTTTTGTAGXXXXXXXXXXGTTTTGGAAACTTATTAAGGTGTTTGTCAAGTGAAAGGACATGTAGTTGGACTCGGTGTTACCAAAAGTTAGGTTTTCGTAAAATAATTTAGTGAATAAA
>Marker292395	TACAATTGACAATCATTCCATTGTTTCTATATGTAAATGCAATTACAGGCTGTAGAAAAACAATATGTGAGTTTCATGAATGCCAAACTAAGAAATTAAAXXXXXXXXXXCTACCATCAAAAAACTGCAAGAAATGAAAGAAAATACCTATAGTTCCATTGCTCCATAAAAAGTTAGCTTGGACAAATTACATGCAAAACCAAGACTAAA
>Marker163766	ATCTTTGAAAATTTGTCAACCACCACAAATACTGAATCATATCCTCTCTATGTCCTTGGTAGACCAAGAACAAAGTCTATGTTGATATTTTCCCATGGTCXXXXXXXXXXCAACATACCATCTTGGATTATGCAATCCAACCATCTTGTCCTATCTAGAGTAATAGGCTCCAAAAAACTTTCCAGGCCTCTGCAAAGTCTGGATCTTCAA
>Marker508121	ATGATTGCAACATGCTAAAAATTAGCAACATAAGATTCTATTGAGTTCCATTATCTGATTCCTACAAGCTCTCTAAAATATTCATTCTCATCTTTTCAATXXXXXXXXXXGCATTTAACTTAATTTTTGTTGCAGCACTTTCTTTTCATTGTTTTGTTACCATTTGGATTTTTTCCATTAGGAATTCTAAGATACCATTCAAAGATATTA
>Marker16875	TGAGTTGTGCATCTCTGAATGGGCAGCTCATGAATGCTATAGGCTTTTCTTCCTTTTCTTCATTTCTTTGTGTCAGCACTGTTGCAGAGGTATGCTCTGAXXXXXXXXXXCCCATTTTTAGTTATCAGGTGGCCTAGTAACTTTCCTGTTGTTACCCCAAATATGCATTTCTTGGGGTTCAAGGATATCCCATATTGTTCACATTTTTTA
>Marker51470	CCTTTATTCTTTTAATAGAGAATACTATCTCGGGTTAGTCACCCCATAGTTTTTCCCTTAATAGGGTTTTCCACTTAAAAATCCTTGTGTTATGTGTGTTXXXXXXXXXXGGTTAAAGGGGTAAGGATTTAGATTAAACCTATGTCAAATTTTTGGAATTCCTGCGGTAGGTTTTGATTTATTACAAAGCAAACCATCCTATGAAGAGTT
>Marker507756	ACCATCATCACCGGTGACCATCCAATTCTCATTGTGACTCCATACCATGGACCGAACTGCCTGATCATGAGCCTGGTAGCAAGATACAGTAGCATCTGAAXXXXXXXXXXTCACTAAGTGCACATAAAGGAAATGCATGGTTTTCACATAATGTTGTAAAATAAAATTAATGCAAAAGAGCTATAAATGGCATTAGTCAAAGCCAAATAA
>Marker46643	GTCTAGCATAGTTTGTGGGTTGCTGTTAGCATTTTGTTTGGCCCCTTGTTCTCCTGTGTCCTTCATTGCTGTAATGCTGGGTTTTGGGGTCAAGATGTTTXXXXXXXXXXGCTTGAAAAAATAGGTAGGTTTGCTTTTTACTTCACCCAAAAATTTGACCAAACAAAGAAGTTACTGATGGTCAAAGTTTTGGTCAACATACATTTCAAA
>Marker343478	GAAGTAAATCACATCAATTAATAGTTCTCAATAACTTGCAATGAAAAAAGAGCATGCAATAAAAATGATACAAGCAAGATAATAGTTTAGTAATTGTTTCXXXXXXXXXXCTATCAAGGCTAAGACACTTTTATAGTTTCCTAGATGGGAGAAGCAAAAGGGGTAAAAGAAGCATTTGGAAATCACACTAAGGGAGTGGACACTAAAGTG
>Marker307446	ATCTATATGTTGTTAAATTAGTCAAATTGATCACTTGCAACCCTAGATCTTGTTATTGTCAATCTTTGTAATTCACAACAAAGGAACAGAGCCTGGATAAXXXXXXXXXXTGCCAAATAGAGCATGAAATTGTGGGTGAGCACAATTTACAATGCTACATTTAGCCCCCACTTTAGTGGGTATATGATACTGCATGCATATGCAAGATAA
>Marker390190	AACTTGAGCATGTTAGCAATCACCTTAGAGACAATTTTATAGATGGTGTTGCAAAGTGAAATGGGCTTAAAATCATCAAAGGTAGTTAGGTCTTGATTTTXXXXXXXXXXATTTAGCATGTTTGTGGAGATTTAGAGCAACAGGATCCACAAGTAGCTTCTAAAAAAATTCAACCACTTCATTCTAAATTTTAATCACATTGTGCAGGAG
>Marker300719	TCATTATGCTCATATTTTAGGGGAATCGACTGTAGAATAGGGGTTGTGGAATTGCAGACATGTTTGTAGGTGTTGGAGCTCACTAGTTCATGGAAAGAGCXXXXXXXXXXTTGTTGTAGTAATTGCGAGTAGAATTTAATTTTTTAGTGAGGGTTTGTGGTAGATCCAGTGAGAATCCGTTGTTGACGAAGTGAGTTGACGGATCACAAA
>Marker85366	AATGATACTGATCCATTAGTATGATCAGGACTTTCATCATCATCTTCTTTACCTCATAATGCCTCTAATCATCACTCTTCTATATACTCCTCTGATCATCXXXXXXXXXXACTTCCCCATTTTCTCCATTTAACTGCCTCTTCTCATGCTCCAATGTGTCCTAGTAGCAAAGTGATGGGGTAGGGAAGGGGGATGCCATTCCTCAGTAAT
>Marker77366	GATATGTGGAAAGGGTGCTATAACTATTGATGGGAAGAATAGGATTGAGGATGTTCTCTATGTCAAAGGGATAAAGCACAATCCTTTTAGTGTCAGTCAAXXXXXXXXXXTGCAGTGAGAGACATGCCCAAAATAACCAATCCTGTAAACACATTAAATGCAAGGAATGTCAAATGGGAAAGTAGATAAAGACAAGTTTTAAGAGAAAGG
>Marker377143	TTTCTTTATTTCTTGTGCATATGGTTGGTTATATGCTTATACTTATGAGTTATAGATATTATGATGATATTGTTTTTGTTATTTTTTTTGCTATGAAATTXXXXXXXXXXACAATATTTGGATTAAGCTTCACAAAAGGCTAAATACTGATCCTTATCTAGACTTACCATTTATATTAGTTTTCAACGTACGCAAGACACAAATATTATG
>Marker276053	TCTTTCCTCTAACATTTGAGATTGGGAAGACAATGATTTGCTTGATGTTACCTCATGTTTGAAATTTTACTAAATCACCCATGCCTTAGAAAAATTTCCAXXXXXXXXXXTGAACTCTCAAAAGTTGTGGTTTAAAAGTTCCAAAAGTTCTTGACTTGCCAACTTCAAAGGCCTTCTATTCTTGTGGCACCTTTTTCTAAGCTAGGATGT
>Marker146179	AAGTTTTCTAAACCCTTCTAGTTTTGATTCTAGGGTTGAACTTCTCTAACCCAATACATAGAATTATCAAATATCCTTGTTATCCAAAAATAATAGTTATXXXXXXXXXXGTTATGAACTCATATAAAACAAAGGTGTAGGGTATATCTTGGATGGGCATTAGTGCCCATCTCCAAATTTCAATCATTTGTTTCTTTGAGGAATGAACAA
>Marker41513	AAGAGTTTATAAAGAAGGAGATCTAGTTTCCAAGTGGAATGAGCTGAAGAGCAGACCAGGACATCATACAAAGTTTGATGCAATATGGGATGGACCATATXXXXXXXXXXAGTTTTTAGTTAGTTGTTGCTCCTGTTTTTAGTTAGTGTGAGTTGTAGAATTTCTCTAAATTGAGGGCAAAAATGACTCTATACCCAATGGAAAGGCTAG
>Marker44852	TATATTCCCAGAATTGCCTTCACAAATTGAAGAACCTACTTTTACTCCCATACCAGGGCCTAAAGCGTCTACATCTTCTCTTCCACAAGAAGAGGATGACXXXXXXXXXXTCCAAAACAATCTGGCCTATGAGGCAAACTAGTGTTATCCTTGCAATCACCCTCATAATCAGTCCACTTGCACATTTGGAGTGCAAGAATGAGCCCTAAT
>Marker49913	TCTTATTCTTTTAACAGAGAATACAATCTTGGGTTAGTCACCCCGTGGTTTTTCCCTTAACAGGTTTTTCCACGTAAAAATCCTTGTGTTATTTGTGTTGXXXXXXXXXXGATCATCCATTTAAATATTTAGAAAGTATATGAGTTAAATGTTGCACGTTTTATATCATATCAAACCTAACCACCACTTACTCACCCAATTTCATAACTA
>Marker203730	TATATCTATTTTTCTAAACCTATTAATGGGTTTGAATGAAAATTTTGACTTGAGGTAGGTTGTCTCCTACCATGTGCATAGGTTACTTATGAAATTTTGTXXXXXXXXXXGAGCCCTTATTAGTCAAACAAATCTTTTTTAAGGTCATGTGAATATTTTAATTTGTTTGTAGAAGTCATATGTTGTCCAAGCCCAATCGAGTTAAATTCT
>Marker71824	CCCCACCTAGTTGCAACAAATGATGACTCTTGCAAGCATGCATAACCATGTGAACACTACCAATTAAGTGATGGATAAATCCACCAAGTTTACTACTACAXXXXXXXXXXGCACAAGTAGGAACATCCTCCTGTATTCCATATTGGAATACCTCAAGCTCAGGTATACTTTCAAGTTGAGTTGTAACATGTTGATCTTCATGTTCATTAG
>Marker148885	ACAAATATATGTTATTATATTGCAACTATATCTTGTCCAAACATTTCTGCATTTCCATCTCACTCAATACCCCAAATTAGAAAAAAAAAATTAGAACAAAXXXXXXXXXXTTAGAATGTTGTTTCAAGATGCCTCAGCCCAAATTGATGTGAATGACACACTATCTGATCCTTTTGTGATGGAGAGATCCATAAGGCAAGGATGTCCATT
>Marker520143	TTAGATATATTTTTCCTTTAAAATATAAATATAGTAGTTATATGACCAGTTGCATTAAATTGTCATTTTAGGCTAACAGAGTAAAGTGTCTTCATTACAAXXXXXXXXXXCCAATAGGTGTGCATTAAGTCATGTTTTGTTGGTGCGTTGATGTGGCATCACGTGATTGGTTGTTTTTTAAATCTAATGAGCACATTTCGTTCAATTATA
>Marker280510	CTAATTTCAAGTGATCTTTCTTCCATCATCTTCATATTTATGTGACATCTTGTTGCTATGCTCAGTATCATACCATGACTACACAAGCCATTATATATCAXXXXXXXXXXGGATTGTGGCACACTTAGAAACAAGATCTTGAGTATATCTTGTTGAGGCTCCTTTCATATTTTGGAGAAGGGTTAGAACCACCAATTTGAGTTTTACTAG
>Marker261167	TTTCCTTGGAGTAGTAAATGCAAATCTCTTTCAAAAATTACAATTACCTGTAGCCATTGCTTTCTGCAGAGCTGAATTCCAGCACTTTTCCCTCTGGGCTXXXXXXXXXXTGGTTTCCATGAAGCCTCTCTGCCCTTCGCAAAATCTTTACTAGCCAATCTTGTATAAAACATGATTTCTCTCTTATGTCAATGTCAATGTCATTTGTTT
>Marker78524	GTAGTGCATACAACAAACAAACCCCAACACAATAGAAAATGTGAACAACAACACAAATAACTCCTAAAACACACTACGAAATCACTACAAACTCCTACAAXXXXXXXXXXATCTTGGGTGTCAAAGATCTTCCATACCTAAATATTGGGAGTTACAACTCCCATATGCCACTTGGATGCTTCAAACAATGCCCTCCGTCCACTTGTCAAA
>Marker105325	TTTATTCTATGTTTGTTTGTGGCTAACATCATGACCAACAGGAACCAGAAGTATCATGTCAACATGGGAGAACAAGAGGTATTCTCAGACTAAGAAGATAXXXXXXXXXXTGACTAGATCATAACCCATTCTTTTGACATTGCACATGCAGTATCTCAGGTGAAGATATCAGTCCCACTCCTAGAGATGATGAAAATAGATAAATATAGG
>Marker106011	ATGCAGGTGATAGATGCCAAGAGCTACCCCATACCAGGTTGGACCGACTTTTGCCAGTGGCATGGAGGCGATAGATGTTAGGATCCACCGACTCGATAGGXXXXXXXXXXGCATCTACGTTCTTTTTTTCCCGTAGGGGGTATTTATGAGTTTATGTGTTAGTGAACTAGGTAATGGGAAGATGAATGTAGTTGGTTGCATCCACTTCTT
>Marker101421	CTCTTCACTTACCTTCTGTCAAAAAAATGTCTTCAAGATGAATCAGGACAGACCTTATTGCTTCTGCTCTTTCTCCTTCAGTCGCACATCACAATGCATAXXXXXXXXXXTCCCAATACAAGCTTAACCCAATCCCAAACATTCTTCACAACATCATCCTTCGAAGAATAACATCTACACGTCATGCTTATTTGAAATAGGTCACCTTTA
>Marker407492	TGCATTTAGCTTGATGGAGTGCTCATGTTGAAAGAATATTAGAAGTATCACCTAGTAGTGGAGGCTGTAAGTAGTTTAAAATTGTTTAATATATCGTAATXXXXXXXXXXAACTTTTTGAACTAAGCTTCCTGTGTTAGGGAGCTGTGTTAAGGTGGGTAAACAAGAGACCGGGTTGGGTGCAAGCTTTAGGTGAGTTTTAACTTGAGTA
>Marker268289	ATCAAATGTGGTTAGCAAGGCATGATAATCTAGCCTTTCTTGTTTTGGATCACCCCTGTGCTCTACAAGACTCACATCTCTATAAAGCCCCGGCTTTTTTXXXXXXXXXXGACCAGTGAGAAGCTCCGCCAAAACTACACCAAAGCTGTAAACATCACTCTTGTCTGTAAACTGGTTGCTCCTCACGAACTCAGGATCCACATAACCTCG
>Marker252958	TCCAAGTTCAAGCTCCTGAAAGTGGAAAGAGATTCTCTAAAAAATGATTTGTTAGAAGTTTGGAGATTAGAAAGCATTACTGAAGAAATTTTGAATCTGAXXXXXXXXXXTATGGATTGATCAATCCACACTACTATTTATCTAAGGAAAACATGTTTCTAAATGACAATGAAACATCTTGGAATTATGAACTGTTTTAGTGCGATTGAC
>Marker66271	CCAATGATGTAGAGACTACGGTATTTTGTTGAGTCCAGAGAAGCACATTTTTGATGTGACTGAAGGGAAGTTGTTAACACATGTCATTTCTAAGGTAGGTXXXXXXXXXXACTCCCATTCTTTATCTACTCTTTTTCTTCCAAACATACTTGTGCAGTTATGCTGACCTAGAAGAAAGGAGTTGATGATGAACATCCTATTGCTTTCATG
>Marker549392	TTGTTATGTTCATCTCTATGCTTTCACAGTTATAAAAGTTGTTGGTTGGCAGGAAGGAGTGCCATTGTATGCTTTTCCTCACACCTGAAAATGATTTTGCXXXXXXXXXXGTGCTTGTCCTTTTCTGAACCAGCATTTCCTTGTGCATGCATCCATTCTCATCTTAGTAGAGGCTATATTAATGTGTTCACAAGTGGTTTAATTTATTGA
>Marker158902	TTCATCCTGGTCGTACCAGCTTGCCTGGAAGGACGTGTGGTCTGCTGGGACTCTTTCTTCATTGGTAGCAGCCACTCATCTTCTCATATTGGGGTGTCTAXXXXXXXXXXAACCCCTTCTGCATCTTCCGTCTAGTCTGAAAGAACACATAAAAATAATAAAATAACACTATTAAGATTCTAAAAAGAACCAACAGGTATGGCACATTAC
>Marker409418	CAAATCCAGTCACAATTAATGTGTATGTTTGATCATATTCCATGCAATAATTAATATATGGATATTCTGTTGTAGCAGTCGATTTGCATCAATATATTGTXXXXXXXXXXATTCTCAGATCGCATGTCAATGATGGGCAAAGTAAGGTCAAGGAAACAAAAGCGGTCACCAGAGTTAAAAAGTTTGCATTTTTAGAGCAGGTGCTAATAG
>Marker191066	TCAACTTTCACAAAGATGACATAAAATAGATTTGAATGATGTTAAGATGAACTTCTTAGTGAAGTTTAACTACCTAGAATGTCTCATAGGAATATTGCCAXXXXXXXXXXTTCATATGGCATTAATCCTAAATTTGAAGCACAAATTGGATAGATGGTCACGTGGATGGATCAAATGGCTAGTAAATCTAGAAATCATAATGAAATCTAT
>Marker357435	CCTGCAACAACTTCACACATCTCTTGAAGATATACACTAATCAAGCCAAACCAACTGACAACACTTATTCTGTCCAAATGAACAACCCCTGAAAGATCTTXXXXXXXXXXATCAATGACAATCTAACACCATCAACTTATCACATGCAACCTATCATGAAGCTCTAGACCTTTTCTAGCTAACATGATTTTTGACTAACATGGACTCTAT
>Marker105656	ATAAACATTCCTTGAACACATTGTGTTTGAATCTTTGAACTGAGCCACAACACTTTTTATTTCTTACATCTGCTCCATGTCACAGTCAGGTTCCAACATAXXXXXXXXXXTAAAAATGGTAGATAAAAAAAGCTAAATGCAAATCAATAAATCAATAACACATACACAGATGCAAGATAGAACACAATTTTAACATGGTTCCCCATGAAG
>Marker180177	TCAGATCCACAGTTTAAAATTTATTTCTTATTGTCTTCCATCTTTATCAGAATCATTAAATTGATTAGTGAGGCTTGACTAAGGTAAAAGGAGGGGAGCAXXXXXXXXXXTTTTCCATTATTCATGTTTACTTGGAGTATTGTATTTACTTTATTTAGTTCCCTTACACAACCTCTAGAATAAAACTCAGGAATCCTCAACTATACACAC
>Marker299387	TCACATGCACCTATGTCAAATCCATGTCCACATGACCAATACTCAGCCCTGGATAATGGATTCTTTAAATGTGAAAAATGTTCATTTGTTTTCCATCCACXXXXXXXXXXTCATGTAGGTGATCCTGCATAAGGAAGCTGGGTAAGTCATCATGATGAGGTCAATTAGTCAAAGTTAATATTTCATGTCAAAAACCTCATGGTTGGAAAG
>Marker68115	TTGCTTCCTTTCAATTAGTATCAAATCTTGATCAACTTTGGTTCTAGTTGTTGGGTAGAGGGTTTTTTGAACTGATCTTCATTTGATTGGAGCTTGTGTAXXXXXXXXXXCCATGTTTTTCAATGTCCATGAGAAGAATTTTAGGATATAGATTAGAGCTTAAAAGTCATGACAAGTGTCCTTTATACCACAAATGTTGGTCATCCCAAG
>Marker344895	CCAGTGATGGTGTTAGGAATTATATATGTAGAGAAATATATATCTAAAATACAACTCTATGAGGAGATCTAGGCTATGGTGGTGTGTAAATGTGGTGGAGXXXXXXXXXXGCTCCCAATCTTCAATCTTCAGAGTTTTAGCTTTCCATCCTACACAAAAATGGAGTTATCTTGATCACTTAGAAGTGTATGGAGGCTTGTGTGAGACTTG
>Marker178881	TATTTTTAATTGTTTTTTATTGAGATCCTCATGGTTCCATCCTTCTTAACCAAAACCATTGAAGAAGCGAAAGAACTGGAACTGGGTCTGATATGCTCCAXXXXXXXXXXCATTGGGCTGCCCATGCAACCTCACTATGTTTGAAAAGAGCCTCCATTTTCTTCACTGTGACTACTCTAGGTGCTCCTTCTATAGTCTGAAAATTTTGGG
>Marker218582	AGTGTTAGCCCATGCATTAATAACTCATGAATAGATTATTGTCTATAATATTTTTTAGCTTTAATTGCATTATAAATTTGTTGAGAACATATGTTCTATGXXXXXXXXXXAGTAGACAACAACTAAGGGCAATCCAACCAAGGCACTATATTATATGTAACCCATTGTAATTCCTAAACCATATACTTCTTATAGGTTTTTTCAAAAAAG
>Marker268186	ATCATCTGAGAATGATTTTGCATATCATTGTTAGGGGATTGCACTAAAGTCAATTAATATTCAACAAACTGTAGAGAAATACATCACTTCCCTATAATAAXXXXXXXXXXAATTCCTGGCTCCTCGGACTAGGCCTTGCCACATGGTCTTGTCCTCCTTGGTGTGGTTCTGTCCATTGTTCAACCTGTGGGATTCACTTGCTTGCATTCT
>Marker271246	AATCTACATTGTGCATCTACCACATTGCTTCTGGCAAAGAAACTTTACTTGGCACACAAATTGGTAATTAATGGGGTGCAACAGTGGCACCATATATTTTXXXXXXXXXXAGAATATGCCCCTCTAGCACCTCATTTGAAATCATCTTAACTTCTAAGGCTTTATCTCATCCTCTAGAGAAAACATGCAATAAGATGTGGCATAATACAA
>Marker469042	ATTGCAAGAACAATGTAATTAGGGGGGAATGTTGGCATTACATTGTTATGGGTCGGTGTTTAGTTGGTGTTCAGTTTGTTGTAAGTTATTTCAGGTGGTTXXXXXXXXXXTAAACAAAGCATTCAATGCCTCTTCATTGAGTAGAGTGAAAGAAAACAAGGAGACAACGTAGAAAGGATGTTGAGAGCCATATTAGGAATTGGTAAGAGG
>Marker481323	TATTTATCGTTACTTACATATGAAACTTCTCAAACTAAGCTGTATTTGTTCAGGAATATGACGATTGTCCATGTTTCCTTGATAGATATGCAGGGAATGTXXXXXXXXXXAAATCAGTAAGAGAAGGCAAAGTGTTCCTCAAATCCTTTGAATTTGTGGTAGCCACTGAAACAACTTTACTTGTTACTCTGTGCATCACTTTTGCATGAA
>Marker158714	GATGGTTAACTTAGAATTTATGTTTTATTTCTATGGACACATGTTGATAGATGTCATGTATACTTGTGTTTTTGTATTTTTTTTGTTTTGATGTATATATXXXXXXXXXXACAAATTTTAAATGAAGGTGCACATAAGGCTAAAGATTGATCCTTGGTTGGACTAAAAACTTAGACTAGTTTTCAACATAGATAAGCAATAAATTTTATT
>Marker548373	ACAACTTTTATTGTCAAAACTCTTACAATGAGCGGGATTCAGTGGCTGGCAACTAGCTAGCGCTTTCACATGGGGCATGCTTTCTGTTGCACATATAGCTXXXXXXXXXXTGCACTGATTTCTTGGATGTAGCTTTCTGAAATACATTTGGCTATGTATTAGAGTCAGTTGTTATTTGACAAATCAGATTAGAAGACCAATTTTATAGAT
>Marker414492	TTCTATTCTTAGACTTGACAACATGAGTTGTTAAGACTAGAATCAATGTAAAGCTAAAAGTTTAACTTTTCTTGAGTTTGTTGGGACTGCAAGAAGGGAAXXXXXXXXXXTGCTAAGAAGGTATGCATCATTTCCAACATCTTCTTTGATTACATATGGACCTTTCCAAACTTATTGAAACTTTCTCTTTTCCTTACATCTTTTATTCTT
>Marker196259	CGTATCTAGAAGGTCGCAGGGACAAACTGATAACATAGCCATACACCACAAGCTATGATATCTCACTAAGTTCACAAGGTTAATGGCATTTAAAGTATGCXXXXXXXXXXTCTATCAAACTCTACGAATCCATTCTTCCAACATTTGGTATCAAAGCAAAGAAGCACCGGGAAGGGTATGCTGATTCAGAGCAAGGAAGCCCCAGGAGAG
>Marker170424	CTGTTTGGTGAATCCTCATGGATAAGTTTCCCTCTTTATGAAGAAATAGTATTGATTTTCTTTTGTCTAAGAAGAAAGTGTGGAGCCTTAACATTTATCTXXXXXXXXXXACTTAAAATCACATAGGACAAAACACCATGATTAACATTAAAAAATATATATGAAGGAGAGTTGGGCTTTCCAAGACCACCAAATAACCCCTACAACTTC
>Marker130891	CTACTTCTATAGTGGACACTACAACTATGGGCTGTCGCTTACTCATCCAACTGACATCTGCTCCAAATAGAGAAAGCACATAATTGCTCATGGATCTCCTXXXXXXXXXXCATTAACCTACTTGTGATACTACCATAAGAAACATTAAACATATCCTCCACATCATCATCTAACTTAGGACATTGATCTAAAGATAACTTCTTACTGATA
>Marker85856	TATGGTATTAAATTTGTTGAAGAGATATTGAGAATTTAAGAAGTTTCAATTCCCTGGTGCAAGACAAAGTATTAGTTTTGTTCAATAGGACTTCACTATGXXXXXXXXXXGTCAAGGAGGTGTCAGAAGAGGCCCAGATGAAGGGGTTCTCAAATTGTTGCAAAACCTAACAGTAAGAATGGAGGTCATGGAGTAGGCACTGAGGAGAGG
>Marker330259	TTCTTCCAACAAGAGACATGAAAAACATGATGGATGTTGGGAGAAGAGCATAACTCCAACTTCTATACAATGGGACCAATTTTTTGTAATACTTTATAAGXXXXXXXXXXATGTATATCTAGAGAGATGATGGTGGATAACCATAAATAAATTCAAATGGTGTCATCTTGGTCATAATGTGATAATGGTATTATACAACCATTCTACAAA
>Marker68305	TAACTGGAACTGAATCTATGCATTAGTGGATGCTATTTATCAGTTCAAAATCTATGTTATTCTCTTCTAATATTTCTATAGGTAGTGAGCCTCCATTTGAXXXXXXXXXXTTGAAATATGTGACAACTGATTCACCCCCCTCTCAGTTGTCTGGACCTAAACCAACAATAACCAACTCTGATCAATCTGAGCAATCAAACAACTTTTACT
>Marker331435	AAACCATAACCCAATAGGACAACACCTATATCTAGCTAAGAGACATATATGAAAATATCCTACCAGGAGGAAAAAAGGACAATTTTGTATGATTTTGACAXXXXXXXXXXGTGTGTATATACACTACATGGTGAAAGATAGAGTATCGTATATAAGATGGAAGAGTGAGTAAGAGATAGATGAAAGATAACTAGATGAAGGGATAAGATA
>Marker85839	CTTTCCATGTGTGACTAGTTGGTCTAACTACTTTTTCTAATTTTGTGGAATGTAAAATTTGTGATACAAAACCTGTGGAGCTTGATATGGGGTAAAGGAGXXXXXXXXXXCCTAGATCACTTCTTTGACCTTTTAGGTGTTGATTCAAAAAGAATAGATGTATGCTCTATAAAATCAATTTGATGTGAAGGAATAAGCTTCTCCTTTATA
>Marker202873	ATGATCAAATCAGGAGTCAACGCCTAACTGAAGAAAGTGACAATCTAGAATACTTGTGACAACATCTATGATGGAACTATTATCGAAGATGTGAATGTCCXXXXXXXXXXAGATTCAAATGACCATATTGTATCCCCTCAAAAGTGTCCACACTAGATGCCTGAGTGTGAACATTAGCTAAAGAAACATCAGGAGCAAAACATGAGAAGG
>Marker353138	TTTGTTATCTTAAAAGCTGAAGATGTTGTAGGTTCTTTTCTTTCTGAAGAAATTAGGAGGAAGGTATCCATCAGTGCCAAAGAGGTTGTGAATGTTTGTGXXXXXXXXXXCCACTCGTGTAGATAATGATGCATGATTAATTGACTTAGGTCCATATGACCCCTAATAGAGATTGGTTTTCTGAATATGAAGAATTTGATGGAGGTAAGG
>Marker478056	ATCTTCCTTAGAACTAAAACATTTACCTTAATATCCATATTCTTCAAAATCATATATCTTAGACCATATGTTTAATGAAATGATGTAAAACAAACTAGAGXXXXXXXXXXTAATAAAAAATTAGATAGCCTTGAAATGTTGTGGGGCCTTTCTAGATGTATCAATGTTTTGATAGGCAATAAAGTGATAATTCAATTTTATAAAAGTTGG
>Marker395646	CATGATAAAAGTAAACATCCATCATTGCCTAAGCTAGAAGGTTGTTTTATTGATGTTGACCTTCAGTCTTAATCTTCAGCTCCTATCATCAATTAAACTTXXXXXXXXXXTTCATGTGCAAGTAAAGATAAATATTTATTTTTAGATTCTTTTCAAGCATGTGGAGAAAATGGGCTCCCATAAGGGTTGAGCCCAACATGCTCAAAATTG
>Marker191354	ATAATTCTGAGAGTCTGCTACGCTTGCGCCTCTGTTTTGGAAAAAATCATCCGCAGGCAGTTCCTCGGGGCTTTTAAGCGAGCATTCAAATCTCCTATAAXXXXXXXXXXGTATAAATCCCCACAAATATAAAGCAAATGCAGAGAAAAACAGAACCATTTGCATCCAACCTTCTCCTCTAGCGAGTCCAACCCTTGCAGTAAAGCTCAA
>Marker93864	TCATGGCAGTGAGCCAGAATGTTAGGCCCGTGGAGTGACCAAGCCTGAACATTATTTTTGTAAAGATTGCAATATATATTTGAGAGCTAATCCTCTCCGTXXXXXXXXXXTTTAATTGTTTGCATCCTATAAGAATGTGGTATTGTGGATGCTATTCATGTGTATATTGTGCTTCTATTTAATTAATTCCTTGAAATGGTTGAAAGTGAA
>Marker165417	TTTGATGATTTCTTGTGAGAAGGTTTGGTGGAGTATCTTGATGTTAATGAAGAAAACAATGCACAAGTTGCACTTTATGAAGGAGAATCAACACCTTTGAXXXXXXXXXXAACTAGGGAAGACTAAAAAGAGTAATAATCTTCCTTGGACAATTGTATACATAAAGGATAATGCAAAAGTTGAAGTGTTGGCTGCTAAATAGCCACCTAG
>Marker307870	CTTTCATTAAGTTTCTATATATATAATGTGATATATGAGTTAGATTTATTGTGTTGAGGTCAAAGGGCTTCTTGAAGAACATGGTATGCTTGCAATTTAAXXXXXXXXXXGATAGTTGATCACTGAGTTGTGTGACAAGCATTTGATACAGTCGACAAGCTTGAGAGAGTAGCAAAATAGTGGATTGAGTAGTTTTTAGAGCTTGGTGAG
>Marker147587	AACTATTTAGAAGACGTTCAATAATATATATAGGCAAGGAGGGATTTTGCCTTGGTTCTAGAAAAAATGTTGTTGTTGAGGTGAATTCTTTGGTTAGAGCXXXXXXXXXXATATGATAATTTCTTTTTGTTTCTAAGAAAGTTCTTGACCTATAACCACATATATCCTTTGTCCATTAGAATATTCTTGAGTTAATATTCTTGACCAAGT
>Marker286320	ATTTCCAATCCCTCCACTAGGGTTTGAGGGAACAAACCCCAATTTTGTGAAGCATTTGTGGAGGAATAGCATCAATAACAAATTGAAAAGTCTCCTGATCXXXXXXXXXXTCCTACCCAAGCTTTGATGGCTTCCCAAGCTTTCCAAATGCTTTCCTAATAGCTTATTATCTCTAAATGTTGCTCTACTTATAGAAAATGTAGAAACTTG
>Marker160167	TGAGCAAATTATTTTTCTTAAGAGTGTTTTCATGTAGCCATGCAAAGTAGTCATGAAACTCAATGGTGTAGTCTTAAATTGATTGCTCTTTATGTTGATGXXXXXXXXXXGACTTGTATTATAACAAGATTTTAAGGTTTTGTTGGAACATACTATTTGGTGCATTATGGCATCGGTCTAAGTTGACACATGAGTTCACAGTTTGAAGAG
>Marker335307	TTCAATTGTGAATCAATCTTAACAATATGTTCATGAAGGTAGAGTCGTCAAAATTCCATGAGATTCATACGAGCATACTGTAGAGTTGAGCCATTTCACTXXXXXXXXXXCAAATTCAAAATCTTTCTACACAACCACCTCTAAAGATACAACAAAAGTGGAAAAATAAAGAAACACAAAATGTTCCACCCATTGATAGTTTGATAAAAA
>Marker175947	TTCGCCACCCCAAGTTGGGCAAACATATAGAGATTTTAGGTGACAAATGTGTTCACTAACACCCCCTTAGTGATGAAATCCAAAGGTAAGCCTGCTAAGAXXXXXXXXXXAAAATAAGTTTTGGACTAACAAACCTGCAACCACAAAGTGTTAGTAGTTTTAAAAATTGAGTCTTCGATGTGCAGAAATCACTATAATCAAAGTGTTAGT
>Marker271413	AGACTGTGAATGGAGTGAGTAAGAATGGAGCAACCATATAAAAATAAGATAAGCAAGAAATTGGCAAGCACAAGGGGGAAACAAAGATCAAAATAATTATXXXXXXXXXXGTGACCAAAAACATCAATACAAAGTTAGGATAGAATGACCTGCAGAAGTAGGAAATTGTAGTATAGAAACATGGTGTTATTCTCATTATTGTCAATATAA
>Marker137551	TTGCTATAGAGTAGCGTATGTTCTACTATATAAAGGTAATCTTTGTTTGTTCCTACCTAGTGCTGTCACTTTAGATAGAAGGTCTGTAGAAGTCTATTTAXXXXXXXXXXGAAGGGAGTCTCACAAAAAGAGACAAAAGGAAAGAAGACAGAAAGATGAAAGATGCAGATTTTGAAAGAGAGCTGGCAGCATTGAAAAGAGACTTGAAAG
>Marker338678	TAATCAATGGTATATGTTGACTCTACACATAGCACCTTTTTGCCAGGTTTTCACTATGGCACTTATCCAAGGTGCCTGTTTACCAGGTTTTCACTAGAGGXXXXXXXXXXATTTTCTTTAAGGACAAGATCACATATCTAAAACCGTCTTTCCTTGATCTTGTTATTATAGTTTCAAAGGAGGTGGTTTTGATAGACATGAAGATGATTA
>Marker318337	ATAGCAAAGATAGAGATGAAGGTTAAATGGGGAAACCAAAAAAGAACATATTATGAGTGTTTCGCAGTGGGTTCAATTAGCTTGTCTATATTGGTAGGAGXXXXXXXXXXCCTATCTCTAATGAGTATGAAGATCCACTTAACATTTATTGCATCTAGGTGATGGTCATAAGGGTGAAGCAACGTGGTTTCTTGGGAGATAACCCATCCT
>Marker124019	GAATCTGAAATCCACAACCTTATAGAAAGTTCATTTCCTTAGAAGATGGTGAAGCCTCGTAGGTATCATAATCTGTAGTATAAGTAAAAGTATTGTCTTTXXXXXXXXXXTGTTGATTGTTAACTTGCTTTTGCATTTCAATATGTAAACAATTGATTTGGACAATATCTAGTGTTGAGCTTGTGATATTGATTGCACATGTAAAAACAA
>Marker98685	AAGATGGGATCCAACTTGCTAAGGCGGGTTGGGAAACCACTGGCCACCTCATAACGCATCCACCTGTAAAATTTCATAGAAAACCCACATCTGAGTCAAAXXXXXXXXXXATTGAAATATGCTATTGGTCTGCTCTCTTAACTCAAGACTCCTTTAGTTGGTGTCCCACTTGCATCACAATCAACTTGGAATACTTTTTTAAAATTAGGG
>Marker335689	TGCGACTCTTGTTCCTTTCTCATTTTGGCTCTCACGTAAACAGCCAGCACATTGTCATGTCTGTTGTGCAAAAGAATTTGACCCTCCGACCTCATGTTTTXXXXXXXXXXTGAACATCAAATCTTATTAAAGAAGCACAATATCCTGTCATGGAGCCCAAGTGTTTATGATTTTCTCTGGATAGTGGCGTTTGTGGTTGCAGGGAAAGCC
>Marker579651	GTAATTAATTATTTACTAGCAATAGTAATTAATTATTTACTAGAGTATTTATTTATCTTGCAATTACTATAGGTGAAAATAGGGCCACCCAAATCTATATXXXXXXXXXXAGTTGGACACCATATTTTGGATGCTTCTTCTATAAGCATGTAATTTTTATTTAACACCTAAGCTAGAGGAAGTGTAGAGTATGAGAGTTATTTGTTTACA
>Marker209961	TGTTATGAGATTCAATGGAAATCGAGATGACTCAAATTATGTGAGTTGAGGATAGATAATATATGGTGACCACTTATGAATGATGATGTGACAATGAAAGXXXXXXXXXXAAGGTTTAGATATCTTAAGTATCTTCATTGGTGAAAGTTGCTTAGGTGTGACCCTTGGTAGAGTTTGAGTATACTCGAGTGACATTTGTAGGGACATGTT
>Marker353213	CTTGATAGCTTATGTAGTCTTCTCACTAGGATGACATATCTCCTAATTCGCACTGATCCTTCTAACTCCTTGGGGCAAAATGATAAGACAATGATCATCTXXXXXXXXXXCATACCATGTTGTATTTTGGAGCAAAAGCAAGGTTCCTCCTTACACAATCATCTCTTCTTATCCTATTTATGCATTCAATAGCCCTATGACCTACCTTTT
>Marker689671	TATTTTTTACACATGATCTATCCATATGTCATGTGCCCTTCACATTTATTGTAAAATCAATTATAACTCAACATGAAAATTGTTGAGACAAAACTATAATXXXXXXXXXXATTAACTACCCAAACCACTAACTACCAACTGACTCATAACTAATAACTAACTAAAAATTATCATCTAATAAATGAACATTAACATGTTAATTTAGTATTT
>Marker672828	TTTAGTAGCAGTTATTATTGTGATTCTCCAATGTTGCTCCGAAATGAAGGATCTGGTGAAACAGAGGATAAAAACCTATCTTGGTCACATGACATAGTTGXXXXXXXXXXAAACTGGAGCTTTAGCCCTTTTTAACATTTCTGTCAACAATAACAGGTAAAGGAGATTTGTGAAAATGTATTTTTGCACCCTGTCAGTATACATAAATCC
>Marker273732	TTTTTGCAGATGCCTAGAATCTTTGTTTGTGGATAAAAGTAGAAAAGTGCAATGGCATTTAGGAGTTCGCTTAGGAAAATTACATTGCTCGAAGAGTGATXXXXXXXXXXGCATGTCTGAGATCTTCTTTCAGTCTACAAGGGCCTTTACTCAAGCCTGCTTTGGATTAAATTCTTGCGCCATGCATCCCTGTATTTTTATTTAAATTAT
>Marker146479	AACCAACCATACAGTTCAATAGTGTGCCTTGCTCAACCTTGAATGTGATGTTCAATCTTGAATGTGAATTGAGAACACCTTCATAGAGATGAGTATGCATXXXXXXXXXXAATGACAAACAATGCCAATGCTTCTACACAAATTTGAGAACACCACCAAAAAGTAATTATTCACCGTCAGCATTACCTCCATATCACCTTCAGGATTCCA
>Marker532299	TAATGTATCAGAGAGGTGCCTAGTGTTCATTTTCATGGAAGGGCTGAAAGAACCCCTTTGAGGCCTAGTTAAGGCTCTAGAACCCAACTCTTTGCAAGTTXXXXXXXXXXTTCAACTATAAAGAACCTTGGAATCTGATACAGATGCTTGGGAAAGGGACAAGACCATTTAATTGAGGTGTATTCATATGACATGGGAGAGCCCAAGACA
>Marker216155	TAATGGATCTAACAAGATACCTAGGTTTGATGGAACAAATTATGCTTTTTGGAAGCTAAGGATGGAAGCCTATATCAATTCTCTAGGGTGCGATGTTTGGXXXXXXXXXXGAAGGTTCTCATGAGATCTCTTCCCAAATCTTATAGTCATAAGGTATCTGCTATTGAGGAGAATGCAGACCTGGATACATACACTATAGACAAATTGTTT
>Marker211903	AGCTTTGGGATATGTGGCCAAAAAACTTCTCTATAGTTGAAATGTGATTTTTAAGGAGGTCAAACTTTCTACTATAGTTGAGTATCTAAAGGAAGATGGGXXXXXXXXXXGAATAGTCAAAGGGACAATAAAAATGGATGATTGTGAGTCCTAGAAATTCATCATAGATAAGGAGATGGTTGCACCAAGGAAGAATGATACATGGGACTT
>Marker144600	TGATTTATAAGCCATTGCAAATCAATATAAGACAACCTTGAAATCATTAATAATATTATTTTGTTCATTGGCAATGGTTTAAACTTTTATGTGTTTACTCXXXXXXXXXXGGAATATGTTGCAACATTTGATTTATGCTCCATTCAAGTGCCACGTCCAAGATACAGACTGTGTAATTTTAGGAATTTGTCCTAGCAATTTAATATCTTG
>Marker271291	AGTGCTTCAGGCTCACAAGTAAATGGTAAAATGTCCCTCTATTATAAGCTGGTTTTAGACCTTGTTTTGGGCAAAAATTAAAACAAGAAGCGAGCTTCCAXXXXXXXXXXCAATGGCAAGCGCACATACCGCTAACGACGCAGCTGCCGCACAGCAAAGCGTGAAAACTAGTCGGCTACCCATTCTTTAACTGCAACAAGTCCCAGCCTC
>Marker441049	CTGTAGGCTGTAACACTACTTGAGAAAAACCACTGTTTTTTACATCACCCCTAGCACATGGGTCTCCTATGCTAGTTCTCTCGATGATGTTATTGACCATXXXXXXXXXXAAGTCCGGGGAGCTCTCTAACCTTGGCAACTATAGGACCATTATGATTGGGCATACTTTTGTCAAACTTTATGCCACGGTGTTGGACATACAACTATTAG
>Marker215313	ATGTTCAAAACCTGATCACATGATTTTGGGCTTGACAATGCGTAAGTGACTAAATCATCATCATGAGCTGCATATTGATTACTGTTGACTGTTTTGTCATXXXXXXXXXXTTCAACGTGCAATTTGAATCAGGCTTGTCTGTTGTTCTCGACCTCTCTGTTTGTCGAAAAAATCTCAACCTCTCTGTCTGTTGGCAAGACTTCAACTGCC
>Marker314167	TAATAAACATGGCTACATCCTCCAAGTCCATTTCCACTATTATGGTTTGTCTTCTTAGCTTTGTGGTGTAGTCTTGCATACTTTTCCCATTTTGTTGTTGXXXXXXXXXXATAATTAAAACAAACTACCTAGTGCATAAATATAGACTTATAGACATTGAAGTATGAATGAACAAAGACAATCTTATTCACCAAACTAAGCCTAAAATTA
>Marker181901	CATAGCCACTGGGTTCTGTAGTCATTTTTACTATTTTTGTATTTCTAAGAATTCCAGCCTAGTAGAATATTTTGAATAGGTATGTATGAACTAGTTTAGGXXXXXXXXXXTGTGTAATTTCTTTCTGTTGTAAAACATTGCATAACAAAAAATTGATTCCATTTAAAACATTCATATGCAAATGGTTAATCTTTGGTAGAAAATTGTTAG
>Marker421103	ATAATCTTAGCAGGCAGAAATGCTAGATGCCTAGAACCAACAAGTTGAAATTCTCATCATGCAATCGACTTTGAAGAACTAGGATTGATAAAAAGGTGAAXXXXXXXXXXCGACGATAGGAGGGTCTTCATTCTTTTCAGTTTATTTCAATTTTTTCATGCTTGCCTAGAGAGGCCAAGTAATCTAAGTTTTGTATTTATTGCCTGTGCC
>Marker183651	TCTAGAGGAGCATGGTGACTCAAGATTTGCTAATCTATTCATGAATCACTTAAAAGGTGATAATTTTGAGCTCAAACTAGAATACAAAGTCCTGAAAGACXXXXXXXXXXTCTGGATCTCTCAGAGGAAGTATCTTGGTAAAGTGTGGATTTGGGGAAGTCAAGAGTTTGAGCCTCTGGTGTGGAAAGGATAAAGAGATATGAATGCTTA
>Marker194824	GCGATGTATGGATGCAGGTCATCGAAGTGGCTTGGAGTTTCTTAAATTATATTTACAAAACGCATATTTGTTTTCCCTCAAATGGAACCGCCACTGATTTXXXXXXXXXXCTAATCATCAACAATGTTTACTGGGATGTCTTTAAAAGTTATTTTCAGAATTATTTTATTTTATTTTACTTACTTAAGATTGCATTTCTACTTTATGAGT
>Marker351903	TAAAGGAAGGGTTGTCAAAGTTGAAAGAGCTCACTATAAGCCAATATTAGATTCTAGTCTCCTTAAATTGGATATATTTGTAAAAACACCAAAAGATGTGXXXXXXXXXXCAAATGTAAAATATTTCCACACAATCACTGATGGTGAAGAAATAAATATGGGTTAATAGAAACATCTAATGTGCCACCAATTGTTAATGTGTTCATAAAA
>Marker264100	AGAAGGAAGGTATATATTGGCAGTATACTGCTATGTATACTCAATAACGAAATGGAGTAGTGGAAAGGAAGAGTAAGACAGTTGTGGAGATGGTGAGATGXXXXXXXXXXTGAGCAGTCTAAAGCATATAGATTAATAGATATCTCTACAAATAAAATTCTGGTAAAGAGAGATGTTGTAGATGAGAAAATACCATTCTTCTTGCATAAT
>Marker343079	AATGTCCCTTTCTAGTAGTTATTCTTGTGTGCAGATTGAGAAATAAAGGATATCCTAAAAGGGGACATTACAAAGTCAGCCAACAATTGGCAAGGAAAAAXXXXXXXXXXAAAATTGATAAATATTTTTGTGGATGATTTTTCTAAGTGCAAGAAGTTGGGTCTACATAGAGGGGAAGTCGTGGGCACAAAAAACATCCCGACAGAAACG
>Marker317464	TCTTATCATATTAGCCTAGACTAAACAAAAGGAAACATTATTGTTCTTTGCATTTTGGTGAACCATTAGATAATACATGACCTATCTTCCTCCTATGTTTXXXXXXXXXXCCCTCTCACATGTTCCAACTAATTCAAATTAAAATTTTGAATTTATCATCACCTTTCATCACATTCAAACACTTGTCCACTTCCCAATTGAATTATGTGT
>Marker219168	ATCCAATAGAAATCTAAAATAAGAATTAAAACAACTACTAATTGACAATGTTAACAAAAAATGTAAAAGTAGAAAATAAGATATAAGGTTGTAAAGGAGAXXXXXXXXXXCAAGTATCAAAGATATCATGCGACAATCGTGAGATAAGATAATTAAGATATAATTGTAAAATTATATGTGGTAAGAGACAACAATGTGTCCCCAATGTTG
>Marker97110	ACTAGGGGTCTTTATTTCTTGGGATTCTGGAAAGTAACCATTTGCACATTCAACCATTAATTTTGGACAACGCATGGTGAGAGGAAAGCCGCCTGCCTTGXXXXXXXXXXAATATATTCATGGAAGACAGAAATGTATAGCCTCTATGAGAAGATATGAGATTTTATAGAGGAGGAAAAGATACCGACTTTACTCACCTGTGAGAATATA
>Marker635766	GCAAAATTAAAATAGCCTCTGAAGTGCACTTAACATCCCATTACTTACTATTATGACCTTTATGAGACTATGTTTTTAAACTAGAGTTCTACAACACTTCXXXXXXXXXXCTAGGGGATTCATCCTCAGGACAGGAAAGATATCCATATGCAGCCCTTTCTTCTTCAAAGAGTGTTGCCTGCTTGAATATTGCTGGACAACAAGATGATT
>Marker218837	ATGTGCTCCTAGGTCCACACATGTAGAAGTGTCACACCAACTACCAGGATAGAGGCAAACCTATAAACAACCTAGTGCATATCATGATAAAGATGCTTGAXXXXXXXXXXATATCATAATCTACCCATGCCTTGTAGATGGGGTTACATAAAATCCTCCATACATCCTCTAGGGTGATGGTAATCACACTTATCGGTAGATGAAATGAGT
>Marker540221	TTGATGTGAACTTTCCAAAGCTGTCCATGCTTCCTTTGATGTCTTGTGACCTGCAATTCTTGGATAAATACTTGGATCTATAGCATGCTAAATATAGAAAXXXXXXXXXXAAAAACAAAACACAGTCCTATTTTTATCTTCTTAATTTAATTTTTATATTTAAGTGCTACTCCTATTTTTAACTGCTACTTTTGGCACCCTGCTTTTTCA
>Marker174898	TGCAATAGTAGATTCACTTTCAATATTTGAAATTTTTTATTTATTTAAATACCATGTATTTTAATGGTTAAACAATTAATGGTTATTTTATACCTCATCTXXXXXXXXXXTAATTATCTCTCATATAAGGCCTTAAGCTTATACGGGATTGGGTCTAATGGAGGAGGGTGTCTACAATGGAGACACATATTTTAATTGGGAAGAAAGGTA
>Marker265934	TCACCCCTTTTCAACTCCATTATTCCTTCTTCCCCCTATCCTTATGAACAACATTATATTTAGTTCAATTCTCTGAGCCTTAAACTTAGAAAGAGGATCCXXXXXXXXXXTGGCATGGACATGAAAAAAATATCTCTATATCCACTAGCCAAACCTTCCATGAAATATTTTGGCTAGATATGGGTTGATGAAGCAGATAATATAGAAAAT
>Marker223686	TCATTATTTTTCTGTTGTAATTCTGAGTTGGGTGTTGTGGGTGCATTGTTATTTTGTTGTGATTTTTAGAGAGGAAGCATAAGAAAGTTAGAGAGAGAGAXXXXXXXXXXATTATATTAGGTATTGAATGTGAAATTAATCTCCGTAGTAGATATTTGCGCCTATATTGGATTTTACGATTAAATATTAAATTGAGTATGATTAGTTATT
>Marker244529	ACATTCTACCAAATAAAGATATGACCTTGTGGCTTAAAGGATAGATAGAGATAACTATGAGCTATGTGTGATCTAAATTTCAGAGCATATGAACTACCGCXXXXXXXXXXAGAAAGTAGAAGCACATACCACAAAAGGGAGTTTATGAGAAGGTTTTTCAAGTCACATAGTGTTTGTGGTATGAACCGCTTGATGAAATTTCACTCCTCC
>Marker127065	TGTAATCTTGAGCAAAGTTGATTATCTACATATGGCATGAATGGAGATGTATATGTATATTCATTAGTGCAATAGATGTAGAATGAACTGCTGATGATTAXXXXXXXXXXGCAAGTTTTATGTATTACATCCACAATTCATTTATGTAAAATTTATCATTAAAAATCCAATAATATTTTAGCAAATAGTCAATATGCAAAGATAAATTTG
>Marker180725	AAATATGTCAAAACTTTGATCCCTAGCCTCCCACTCCCTTACTGTTTGTGGAACCCTAGACCTTTTCACTTCCTACTCCTAGATGGCACTTGGTATCCCAXXXXXXXXXXTTACTAGGCCCACAAAGCATTTCTTCGCCTTGCATCTTGACATCCCTATGTCTCATTCCTTGAACCCCTAACTCTAAATCTTTAGAAATATTAATGATAG
>Marker361128	CCTATTATATTACTTACCTAACATTGATTTTTATTGAATTCTGGTCAATATAAAAGAACAAAATAGAGCATATAATATTTTTCTTCCATAGGACTTGATGXXXXXXXXXXACATTTTCCTAAAAGATATGACTCTCAGAAGATCAACTATTTTCTCAGAACAAAGCACAAAGATAGTCTTAGATAGTAAGTTAAAGGAGAAGGATTTTGG
>Marker326061	AACTTCATAGTTTCACCATGTCCTCGATGATTTTTGTGGGTGGGATAGTTCCTATGTCTATGGACTTGACCTCTGAATTTCCAAATTTTAATTTTAAATTXXXXXXXXXXGCTTATTAGTTTTTATCCTTGGCATAATTGTAAAGTTGTTCCATTTTTTAAGGTTGACTTAGGAGAATGTGTCCACTAGCGATTTTGGCAACCCTCTAAA
>Marker258215	TCCAAGGAATTACAATGATCAAGCATTTTATCATTATCATTGAGTTAAAAGGAATCATACTCAATATTGCATGGGTCTTAAGCATGAGATACAATATATTXXXXXXXXXXCTCCTTTGATTAGATTTTTTTGATGAGGAAATACCAAAAAAATCATCATGAACCATTATATGTTATAGAAGACAAAGTCACTAGGGACATTCGTATTGAT
>Marker333580	TACAGAATTTACAAGATTCTTTAGATGTCCGAAGGGAGATTCAAATGGATTCTTCTGGAAGGTTTCTAGTTTTGGAACTATAGGATTGTCTTCCTCAACTXXXXXXXXXXTCTTTATTCTTGGCGGCTTCCTTCCTCATCCCTAGGATTTTCCTTAAACTTTTAGGAATTTCTTGCAAAATTTCTAGTAGAGCTCTATTGAATTTATTCA
>Marker703870	AACTAGAGCTGTATACAAACTATCTTAGTGGGAATATACCCCCTGAAATAGGCAATCTTACTTTGCTAAGTTATTTTGATTTATCAAAAAACATGATGAGXXXXXXXXXXTTGTCCTTAATAACTCTTTTACAGGAGAGCTGCCTGAGTCTTATGGGGATTGCAAAAGTTTGTTGCGTTTCAGAGTCAATATCAACAATCTGAGAGGTGA
>Marker271477	AAAGATAAAGTTGGCTTCTATTGCTCAAACTAAAGCCAGAGAAGACATTTTGAAGTCTCACATAGAAGATAGTGAGCTACTAGGTCTGGCATTAGGGATTXXXXXXXXXXTTACAAAAGGAGGAAATGTATATCAATTTTGCTTATCCTGTCCTAAAGTCTTAGAAGATCTTGAAGATAAAATAAAAGTGTCTAAGCAAAAATTATCTAG
>Marker431502	ATCTTTAAAGGAGGTTTTCAAATCATGAAGCAATTTTCATTAAACATCTAATTATTAGCACAATTCAACAAGATTCTCCACAATATGAAAGAAAAAGGTGXXXXXXXXXXATATCAACAATTTCCAACAACCAACTCAACTCGATGTTCGGAGAAAACCATGAGAATATAATGAAAATTCTGTAAATACTGTGTTTGCTCTCAAATCCAA
>Marker163481	CCAGCCAAAATCAAGTTGGTGGTTCCAACCCTTCTCCCAAAAATGCTTGGGAGAACAAGATAGACTCAAGATCTTGCTTCCAAGCTTTCCACAATCCTTTXXXXXXXXXXTGATACACAATGGCTTGTATAGTCATGGTATGATACTAAGCGTTGCAACAAGGAGCCACATAAATATGAAGACGGTAGAAGAAAGATCACTTGAAAGTAG
>Marker470078	CACTTTCATGTGCAATCCCCAATGAATGGGAGCATTGTCTATCTAGCATATACAATACACTTATGGTTGCATCGTGGATACTGGGATGCATTTAATTATGXXXXXXXXXXGATTGCCCAATCCTGTCGTGGCCAAGCATTATCATTTGGGGTTTCAATCCATCACCTATGAGAGCAAGTAGATGTAAAGAAATCCTCAGATGCAAGATGA
>Marker404035	ACAACTGCAAAACTGAATCTTCCTTGCAAAAATAAAATTTGTGAGTAATGTAGAGGCCGAGAACAACCATACAAGGACTGAAAATACTCAATTAACAATGXXXXXXXXXXATTCTGATATTCATGTGAACTTCTCCTTGAGATCTTCTTGTGGTGCCCATAACTTCCTCAATAGGAAGGATATATCCAACACCACTCCTTACCTCTTGAT
>Marker349252	AAGTTCAATGAAGTTGAGAATGAGAGTTCACATGATCAAAGAAGGGGGTAACACATCTTATCTAGTTTGCTTAGACTATAACAGATTTTATAGTAGATACXXXXXXXXXXTAGTGTTTTTGAACAATTGACATCTTGTTATATGGTTACAGTCATCCACATGTAGATCCATTGAAGTTGCCAAGTGCCTATGTGAAGTTATGTAAAGTCA
>Marker452097	AACCATAGCATACATCAAACTTCCAACTACACTCTGCTATGAAACTCTACTCATGTCTTCCATCTTCGATGGGGATGTTGAACATTATGAAGCAAATAACXXXXXXXXXXGCAATAAATAGGAAACAATCACTATCATCTTTTTAGTAAATACAATAATCTGATTTAGAACGCTCAAATTCCAAACTCAACACATATGTATCAAATTTTA
>Marker124143	AATTTTGAGTTGTGAAAAATAAAAATGGAGGATCTATTGGTAGATCACGATTTGTGAGGTGCCATTGATGCGAATGTTCATAGACCTATGGATGCAACCAXXXXXXXXXXGTTAAATTCAGTGGGTGTGAAGATGGAGGAGGAAGAAAGATTTTAGACTTTGTTGTGTTCTTTGCCTGATTCATGGAATAGTCTCATGATGGCCATTGGG
>Marker194776	TGTCAAAAATAAAAGGGTATTGGATCCATGTCATCTACAACTCCATCACTCAATATTATTTCTAGACCATGAAGTGGATTTCATCTTTGATAAGTCTAATXXXXXXXXXXTGTTGTAGAGAAAAAATACCATTGCACTCAACTTCTATAATATAAAATGTTGTTTTCTCAAAAAACTCAAATTTAAACCTATTTGAAACTTGAAAATAAG
>Marker196110	TATATTTTTACAAAGGGCCTCAACAGGCCAGAGCCAACTTCGTCTTCTCTATATAGTATACACTTTCATAGCAAAAAATTCCAGTGGGATTTACAAAATTXXXXXXXXXXAGTATATTTCCATCCCCATGTTTACATCTTTCATAGTCTCTGGGGTGAGGGATACCAACACTGGGTTGGGCCACCATGACCGGGTCCTCGAAACCCCCCA
>Marker409040	CATTTATTTCTTTCATTGTCAGGGGCCAAATGCTTTGATGGTTTTTCAACTGTAGAAAGATCCCGGTTGTCTTTCTCTACATGTGCTTCAGATGCTTCAGXXXXXXXXXXCTCAAAATCTGCCGCATAGCAGATGAAAGGAGATAATGACATGGAGTATAGTCCTTGAGGAAAAAACAAGCATACAACCTTATTCAGGACATCTGCCAAA
>Marker109764	TTCCTGATCAGTCACCACCTACCAACAAATATTTTGTGATGAAGGAGATAAAGTAGATTGAACTTTTGGAGTGTCAAAGTGAGACGGGTTGATTTTATGTXXXXXXXXXXTAAATTTATTGATCCATGCAAGGTAGAGGGAACTACACCCATGGCATGGATCAATGTTATACCAAGAAGGAGATTATATGAAAGAGTTTCAAGAATGACA
>Marker236774	AACATAGGAAATACACTATGCAAATGAAAATAAGAAAGAAAAAGACATATCCATCATTGCCTGTTTGGAGTCTGGAGTTGACCTTCATTGTAGCTAGCTCXXXXXXXXXXGACATTTCAGCATGTGGTGCAAAGTGGGCTCCCACAAGGGTTGAGCCCAACATGCTGCCCCTGAATCTTAAGAGGGGATGGGATAGAGATTCATATTCAT
>Marker70740	AGAGTGAAAGTTTGAATCTTTGGGAGTGAATTGACTGAAGTTGGTGAAGGAAATCCATAAGATCTTGTTGTGAACAGATTGCCAAATCCGAGGTAGGTTAXXXXXXXXXXGTGAATCAAACTGAAGAAACCCTAGGAGATGATGAAGAAGAATCAGACCAAGTCAAGATGTTGCAATCTATTTCAAAGATTAAAAAAGACCTAGAGTTGA
>Marker186367	TTCAAACTCCCAGTGGTCATTGTCCTCTTACCGGTGGTTTTGTATTTTTACAAAGGCAGTTTCATGCCTTAAAACTGGCAGTCAAAGGAGATTTTGTGATXXXXXXXXXXGGCTAGATGGAATATTCTACCAAGGGGGCCTGCTTAGCATAAATTTTGACCACGGGTGTCAAAATCAGGAAAACGAGATATCAACAGAAAGATGACAAAG
>Marker232607	TGTTGCACATATGGATAGGCAAGACATGAATCTTACTTCACAAATACTTATATCAAACCTTTACGAATTTGAGCAATAATGTTACTACACAAATACACTCXXXXXXXXXXAATTTGTTTACTTCATCATTCATTACTTTCTGAGTTTTCTCATAATCTTATTGTTCAATAAATATAGAGAAGCACCTAAAGGAATTGGAGAAACATTAAT
>Marker463779	AACAAACATGAACTCAAAAACACATAAAGTGGGGGACATTCCACCCATCCAATTATGCAAAAACATAGAAAAACAACTAACTAAAAAGGTCACAACTCAAXXXXXXXXXXAAATCAAAGTGTGTGAGGACAGATGCGGCAGCCCCGGCGCCGAAGCTGCAAAGGCCGTAACGCCCGTTAACTCCCGTGCAGGGGGACCATTTAACTCCTC
>Marker324614	CAGACATTGTTATGCACCTACTGTTGAGACTTGATTAGTTGAGATCTATGTGTAGTTTTAGTTGACATCTTATACTTTGCTTTCCCTCTTGTGAAAATGGXXXXXXXXXXAGAGGTAAGTGTTGTTTCTAACATCTTCCTTTACTTTGTATGGACCTATCCAATTTGGTCTGAATTTGTGTCTCTTTTGTTGATTGGATGGTTGATTCTA
>Marker375366	CAAACTCTAAATCAAGAGGCAAATGTGGCATATCCTTTGAATAATGTAGCCACCAAATTCAAGGCAAACCTTTGGAAATACAAAGCGTGGTATAATGTTTXXXXXXXXXXGAATCTAAAACAAGTTCCTTCACAACTTCTTCTTCAAGATTAGGTAAAGATTTTGTATCACTCTTCACCCAATACTTTTCAGATTCAAAACCCTTTTGTA
>Marker247262	CCGGTTTCAGCATAGGTGGCTGTAAACACAAGCATTCAGCCTTTCACATGGTTGATACCAGCAAAGCGCTGTAGATATACCAGATTCTTTGTAGTGTATTXXXXXXXXXXGACAATTGAACACTTTTGCGTCCTGGAAATTTGCTTCATCTCCTCCATTTGTATAATACTTAATGTCAAATAGGTTTTCTTCATCTTGGTTTCACTCGAG
>Marker235348	TCCTCCTAGGAAGATAATTGGATTTTTGGTAAGACCTTCAAAGATGATCTAATTCTTCCCTTTGGTGGCCTTCCTTCAAAATTCCTGGGGCACTAAGGTGXXXXXXXXXXCTAAAGCATGGCCCAAAGCTAGGTTTTTTCTTTGGTTGACTTGTCACTCTCGGATTCACTTGGGATCAACTCCAAAAGAAGTGTTTTTTGGGTCACAATA
>Marker94367	AGAAAGAAAGAAGCATCATCATGCTATGGCTCACCTTGCCACAGGATTGGAGAATCTCCCTCCTTGCAAGTGTTTATCACTGATGAACACCGAAGAGACAXXXXXXXXXXAGACCCAAAAAACCATATTTTGATATAAAATTGACTATGTTTGGAGAATTTGTTTTTTAGCTACTTTAGGGCCATGAAGAAATCTTGTAGAAAAAGATTA
>Marker329141	TTCTCTCAGTGAAGGGTTTAGTGAAGATATTTGCAACCTTCTCTACTATAGGACAATAGCGCAAATCAATTACTTGCTCCTATATCTTCTCTCAAAGAAAXXXXXXXXXXTGGGACCAAAACCAAGGTGAAAATTGTAGCCAAATGTGGACTTGTGATCATCAAGATCACTAGCCCAATAATATTTTGTGTATCCAATAAAATCTCAACT
>Marker558736	TGGGTGATGATTCTCATTTAAATATTGTTGGTTGTGGTAAAGTTAAAATTAGATTTCTTGATGGTAGAATAAAAAGGATTAATGGTGTGTTGCATAGCCCXXXXXXXXXXTTGGGTGCCTAAGGGTGCTCTTTCTTCTGAATCAAAATTACCTATAGAAAAGACTATGTTATGGCACCAGAGATTAGGCCACATAGAAGAAAAGGGTCTA
>Marker97655	CTTGGCATTAGTGTAATTTTTCTATCTATCATTTGCTTCCTCCAATCTATTTCTGATCAACTTGATCTATTCTTCCATTTCTGATAACATTTATGGACCAXXXXXXXXXXTCCTAGCACAGACTAAAAAGTTTTCCAAAATCTTGACATCATGCACACATCTCTATCTAATATAATTTTCTTAGGAACTCCATGTAATCTAAATACTTCT
>Marker341953	GTCGCTATGACATACTGATATGACAAGGAGATAGCAAACTTCTTGCAATAGTGTATATCAAAAAATTACTCGTGGGTTTGAAATATGATCAGCAGTAATTXXXXXXXXXXAGAAGCTTCATTCTTCTTATTAGAATTGTTGCTTCCCCTAGTAGATTTAGTTATCTTCACAACTAATTTTATTCTTATTTAATATAAAACTACAATATCC
>Marker406345	AGTTTATAGTTGTTGCACATCTATTAGTATGTTATATATATAGCATATCCATTAGTTGCATAGTTTTAGTTTGTCACTTATGGTATCAGAGCTACCGGGTXXXXXXXXXXGAGAAAGACAAACCTGGACAGCTCCAAGAAGAGAAGCAGTGAGAACAACCATCATGGCGAATAGGATATCTAAAACTGAAAACAAATCTGTAACCTCTAT
>Marker455660	TACACATCAGTGATCTCCTTCTCTAACCACCTAATCCTAGGTAATGATCTAGAGCTCTCAACATAAAAACCCTCATTAATCATATCTGAATTATCATCAAXXXXXXXXXXAGACAAGATCCTCTCCACATTCCTCGCATTGTCATGAGTTTTGCATGTATAGTAGGTTAAGCTAGCAGGAAAGGGGTAACCTTTCTTCAAGTCATATCAT
>Marker175113	TAATAATCCTTCAAGCTAGTTGCAAGATATGACTTTTTCCCTCCAAAATGGTGAATATTTTTATGGTATGAGCAAAACTAACTATAGGTTGCAATCTATTXXXXXXXXXXCTCTCCCATTGCACCCAATTCAAGTTGAACAACCATTCATGAAGTGGGGTCTAGACTTCATTGGAGTCATAAACCCACCTTCAAGTGCTGGTCACAAGTG
>Marker743514	TTTTCCAAAAGGAAGAATATTGGTTTTTGTATGTGGGTTTACAAAACCAATAGCAACTAATTGTTTTGTTGATAAGTATAAGGCTCACTTTGTTGCCAAGXXXXXXXXXXATAAGAAAATGGATAGCTTCCTACTTTTGTCTAGTTTTACAAGCTGCCACTCAAATCCCACAATTTACACCAAGAGGAATGGTGATGAACCCCTCATTCT
>Marker259557	TACTATCTTCATAATGAAACTATTACTTTTAAGAATAAGAATAAACATATTCTTTTGACAATGAGAAGATCATAAAATTGCTAAGTAGAATGCAACCATGXXXXXXXXXXTTCAAACCCCTCAAAATATAAATCCACATGTGTTTCATGCTATAGGAGTGGCACAATTAACATCACCAAATGAACCCCAAACAAAATAAACAATTATACT
>Marker507432	TTCATGTCATTTTTCAATGGTATCTTTGCAAGCATTTATCAAAGATCTTGATTTTGACCAATTTTTAACCCTCATGAGTGAATATCCTACAATATTAGAAXXXXXXXXXXATAATCAAATTCCTACCTCTGTGGATCATCCCACCAACCTTCTTCCTTTAGTTGATTGTTCACACACCTTGGATTTCACTAAGGAAGAGAAGACCTTTAA
>Marker369711	GATAGCACAAACTGTGGAAATCTATGACCCCATAAAAGATATGAATGGAGCAATAAGAGCACAATTAATTGAAACAATGCACACACAACTGCAACAATTAXXXXXXXXXXCTCAACTAAAGGGGATCTACAAGAACATCTTACTTGGTAACTAGCACCACATGCCTTGAGGACAAGAAATAGTTCTAAAAAGACGGGATGATGTTGGCAA
>Marker448873	CTAGTTGTCACATGTGATAGGAATGTGCACTTGTCATATGACTACAACTCCTTGGTTGTCATCCTTGCCTTTATAAGCAAGGCTATCTCTCATTGTATTTXXXXXXXXXXAAAAGGAAGTTTGGCTTCTTTTTAGTTATACTAGTATACCCCAGTGTATTATTCATTTGCTGAAATTTTATAGCTATCTTAATTTCCAGATTTTGTAAAT
>Marker348974	TCACTATAATCTGAGCTAAAAACTCCCATGGAAAAATGACCACTCTACTCAATACTAGAAGACTACCTCAAATCACTACCAAAATTCCAACTATAGAAATXXXXXXXXXXAACTACAACATTAGGATCTCACAAAGGGCAAAGTAAAACTATAATCTCTAAAAGAAGATTACTTCAAGTTCTAAGAAAAACAACTACAAGTTCAACCCAA
>Marker260542	ACCTTCTTGCCCCTTGGGGGTCTTTTGCTCTGCTGTTGTGGTGGAGGGACTCTATCTCCCTTGGTCTTCCTCTTCTCTAATAGGAAGTCATCATATTCATXXXXXXXXXXGTTCAGAGTTAACCTCTGATATATCCTTCTCCTGGCTTCTGCCTCATCCTCACAGTCAGCCCAAAAATCCTCTAGGTGCCTTTGGTGAATAGGCTTTCCT
>Marker395031	TGTTCAGGATTTTCTTTAAAGACCCAGTCTTCCTCCTAGAAGCAGAACTTAACAAAATATTGTCATCCAAAAAGAGGAGTGTAACTACCTTTGATCTGTCXXXXXXXXXXCTTATCCAAGGTTAGATATAGGAAGTTACAAACCACTCTATCATACACTTTATTTATAGCCAACTTAATTATTTTTCCTTTTACTTTTGAGGCTTTCAAG
>Marker207857	CCAGCTTAAGGTCAATCTTGTTGGTTATCCTCCTATACTAGGAAGACCATGGCTTGCCACAGCAGATGCATTTATAGGTTGCAGGTCAGGCAATATGACCXXXXXXXXXXACTGTCTATCCTGCTTACAAGACCCCTTGAGAGGCATAACACCCACTAGTTCCTTAGAGGAGGTATCTGAAATATTTCATACTTTATTGCCCCAATAATG
>Marker324526	AACCTTGACCTTAAGAGCATGGGTTTTGAACATAAGTCTTCCCCTTTCAGCAAGCTTTTTGACCTCGTTGACAGCCCCTGGAGATGCAAAGTGAACAAAGXXXXXXXXXXTTTCTGGTTATAGGGTCTCCATTTATGAACAACTTATTACAATCCCTCCAGTTGTAATTTCTTGTATGCAGCAGAAATGCATGTCTAGGATAGGAATAAT
>Marker324784	CGATCATTGACAAAAAGAGTCTTTTTATTTACTGAACATTCCTACAATGTTTGAGCTTTACCTTCTCTAACCTCCAAAACAATATTATAAACTTGATATTXXXXXXXXXXTAATTCTACTATACTCTATACCAACTCTTCGTATCATGAGTCATTATATCTCAAATAGAGTTTCTAATCATGGAGATTGTGAGGTAATACCTTGGCCTAT
>Marker507585	AATGATATGGGAAAGATGTTGAGTGTATAGGGATTTATTGACTTGGATTGGGTTAGAGATCTTGAAAACTATAGGTCTAGAAGAAAATATGTGTTTATTCXXXXXXXXXXGTAATATCATTTTTTTAGGGAAATGATTGAGAATAGGAAAGTCCACATTGAGAAAATTGACACTCAAGTAAACACTACATATTCTTTGACAAAACTTGTA
>Marker190361	TTATGTGTTATAACGGGATACAAAGCACTCCCAATTATGATAAGCCATCAAAACTTTGGGAAGAGGATGAATATCATATCTTGATTGTCCATTTCCCACTXXXXXXXXXXAACCCAAGCCATATCCCCTCCCCCAGAAAACTACTCAAGTGGCCTTTTTGGCCAATCCCTTTCTCTTACTCCTGGTGAGGAGAGCATCCATAGTCCATTG
>Marker500616	ATGCTTCTTTGAAGAGGGGGTCATGCTACACCCTCAATCCTATAATGTTAATAGGGTTATGAGTAGTCAACATATGGCTACCTTAAATCTTAATTAAGTTXXXXXXXXXXCATATATTCCTTGAGTTTATTTATAGGGTCACTAGTTGGTTATCTCACTAGAGTGACCAATTCTGTTGTAGAATCTTCTATCTCCTTATCTAAATTTCTT
>Marker311853	TTTTATCAACTTGAGGATCACCATAGAGTCTTTCTCTAATTAGCTGCTGAAATTCATTTTGCACATCCCCCAAGCGACAATTTAGACCATCCTCTGCGAAXXXXXXXXXXTCAATCCCAAGAATGACATCCTTAGAATTTGATACTGCCTCAAATAATTTGGCGAGTGTGTTGGTGCCTTTGATGATGAAATCTTTGATCCAATCCTTTG
>Marker415758	CCATGTCAAACACCTATAAAAGGGAGTGAATGGGAGAGGGTGAAAAAATCAAAAAGCATACTTAATCCAGATCCATGGTTGTAAGAATACAAGCCATTAGXXXXXXXXXXAACCAACTTATCTTGGTCGTCCTGGAACAACTCCCAGATAACAATACCCACAGCATTTGGCAAAGTATGTGGGTCAATACCCATCTCGAGATCACGTCGG
>Marker328461	TCATGATGGAAATGATTATCCTTTGCATAGGCTGCTACCTCACTAGCTACTCTTGTGTATGCTCTTGCATTGATGGAAGCTATGTAACATTTTTATGTGAXXXXXXXXXXTTGTGACCATCTTTTCAATGTGAAGGCTTGCCTTTGAACCTTTGACTTGATAGTCATTGATGGGCAATGTCTTTCCTGATCTGAATGATGAGATTATATA
>Marker242971	TTGTCTTTTTGAAGATGGACCTTTAGTCTTGAGTTTTCCTCTTTCAAATTTTCAACCACATTTTAGGCATAAAAGAGTTATTCTTCAAGATCTACTTCTTXXXXXXXXXXGTTGAGAAGATATATAATACCCATTCTCTATTGACACCCACACATCAAACCCTAAAGAGGATAAATATTCTTGCATCCTAAAAATCTAAATAGAGAAATT
>Marker447719	ATTTTTGGAAAGGGGACATGATAATGTGTCCCTTCTTTATCCAATAATCTCCTTTCCATTTATCAAATCACTCGTAGTGGGATAGGGAAAACAATTAAATXXXXXXXXXXCTTGAGATAACATCTCTTTGTGAACCTACATCTTTGGTTCCCACCAAATTCCATTAGCAAGCTACTACCATTAGTCTTCCAACACCAATTTTTTGGGATG
>Marker430465	ATTGAGGAGTTCTTAGGGTGTATTCTGTATGACCATCAAGGTATTGTTGATGGTGTTTTGCATTATTATTTGGATTTCAAACTATGCATTATGGGATGCAXXXXXXXXXXGTTAGATTAGTGCTTTCCAACTACTCTTTCCTCCTTTAGGTTTAGATTACATTGTGTATTTCTAGGGATGTTTCTTTGTGCTTCACTTTTATTTTTATAT
>Marker383035	ATTTATGTTGTTGTGTGTTTATGATTTAGCCCCTTCATCAACCTTCATGATCAATAAAAGTAACTGATATTTTACCTCTCTCTACACTTTTACACTATGTXXXXXXXXXXACTAGCCTTCTCTAGAGGTCTGATCTCATTTACAAGGTTCCACACTTTGAGATTAATCCCATTGTGTCTAGATTTTTTGTAGTAGTAGGCTTCAACAAAG
>Marker526817	TGGATATCAAACATATCCTAATCACTAGGAGATGCCCACAAAAGATGCAGGCTTCCCAAAGGAGAGTTTTAAAGATTAGATCACAAAAATACATGATCAAXXXXXXXXXXGGAGATATGCCCATTTTCTCAATGGGGTGTGGATTTTATAGGTCTTATCAATCCTCCATCATCTTCAGGCCACATGTATGTATTGATAATCACTAGTTAT
>Marker246039	CAAAATGCAGGCGTGTATGTCTCTTGGCAATAGAAAACTCTGCCCAAGGAATCCAGCAATATTGTAAAGCTTACAGAAGGTTTCCTAGCATGTTGTTGGCXXXXXXXXXXGTAAATTCAGAGCAAAGGAATTAAAAGTTGACAAGGAATGATTTGTTTTTAACATAAAAGCTTTAATAAACTTCTTCCAGATTTACATCAGAAGACTCAT
>Marker367633	TTAATTAGACCCCCTAGATAAAGTGAGAAGAGTTGAGTATGACAACATGCCAAGTAATTAATAAAGTAAAGAGGAGGTTAGAGGGTGCTTAGGTCTTAAAXXXXXXXXXXTTTTACTCCTATTGTCATATTTGAATTAGGACTAAGGTAGAACTTGTTAATCAAAACCTTTTGGAGTTTGGTGTGCTAGGATTGAGGTTTAAAATTTCCT
>Marker558982	TGCATAAGTTGTAGGTGCCCCAATAGACGTGTGTAAAATGAGGAAGCAAGACAAGTGTGCAAATAAGTGCTTGAATACTTATGAGATGAAAGATAGAAATXXXXXXXXXXTGAATCCTCTTGTGCTCCAGTCCCAAGGTAGAGTGCTACAAATAGAAACTAATAGTCCATGCTATTCCCCCACAACTTCCATTTCTTCATCTTTAAAAAC

## Sheet: LG6
>Marker27478	TTATTATTTTTTGGCAACAGTTTAGTAGCTCCTTGATCTCTTTCTTCATTGGTTTGGAGGACTTGGGAGAGTTATTTGGATTGGTAATGAGAGATGTATTXXXXXXXXXXCGGTGACCAAGAACAGAGCATGCAACAAGGTCCAACAATCAGGTTCGGATCTCTCAGAGGAAGTATCTCAGTAAAGTGCAAACTTGGGGAAGTCAAGAGG
>Marker131635	CCTCTTGACTTCCCCAAGTCGACACTTTTCTGAGATACATCCTCTAAGAGATCCGGACCTGATTGTCGGACCTTGCTGCATGCTCTGTTCTTGTTCACCGXXXXXXXXXXTTTTCACTTCTTCTCATGTGTTTTCTTGGGATTGTCTTGATATCTGGCAACCACACATATTGCATGCCTAATATTAGGTCAAAAAGTAGTCTTGAATAGC
>Marker166947	TTATTTATTTTAATTAAACTAGATTACTAAGTTAGTCTAGTTAGAACATTAGTGTATATAATATATTTAAGTTAATATTCTTTAACACTTCAAGCAGTTTXXXXXXXXXXAATGGGTAAAGCCAAAGTGCTCAATGTTTATTTCATCATTTTTTTGTAGGTGCTAAGTTATTTCATTGAGTCTTACACTCATGTAATAGCAAGGAATAAA
>Marker62010	TTGATTATGCCATCTACAGTTATAGCTAATGGTGAAGACAAGTTGTTATTTCCATAGAATGATACATGAAAATTTCCAATTGCATCGCATGACACTTTCGXXXXXXXXXXAGTTTTAATAATTGCATAAAAATTTGAGTCTGGTGGAAAGTAACTAAATCAGTTAGGGATTTTGAAGACATTATTTCCATTTGCTTGAACACAGATTTAT
>Marker112551	CTCTCATGTGGCTTCTTCCTTATGTTGTCTACCCTTATTTATGTCTACATTTATCTACTATGATGTTATCTATTATTTGGAACTCATGGCTTTCTCTCTTXXXXXXXXXXGAAACAATTAGTCACCATGTTCATGGCTAATCTTAACCAAGAAATGTGGTTCCATCTACAAATCCTTTGCGCGTCGACTTTTGAAGAAGTCATTGATAAG
>Marker10725	ATGATTTTAGGAGTATTTTGAACATTAATGCACTTATTCAATATCCCCTTAGTAGGTGGAATAAGTCTATTAATGATGATAGAATTGATATTTTTTTGAGXXXXXXXXXXGAAGATCAAGAGTCTTCACATCCTTAGTGATATCCAAGGTATTTGAACATTCAACCAAAGGAGGAAGATTAAGGGTCTTCACATCCTTAGTGATATCCAT
>Marker88742	GGTCCAAGATCTACCAGATTGATTACTTCCTTCTTTCAACATGTCAATACATTATAGGCGTTAAGCACCGTTTGGATACTATTGATTCACATACAAATGGXXXXXXXXXXCCCTAGAATTTTCCTAACGAATATTCTCAAACTTTGCATTGGAACTCCTACAGTGATCAATGATACTATCGTTTGCTCCTCCAACATGTCCTAAAACACA
>Marker56194	ATCATTCAAATAGGGACTACTCAAATAGGGGAACCACTGCATCCATAATTCTATCATGGTTGTCTATAAATTTTTCATCCTTATTCCTTCTAGCAAGGCTXXXXXXXXXXATGCTTCTGCATTTACTTGTTCTTCGTCAGTGCAAACCCTAATTCTTCAACTCTTGTCACAAACAGCTCAATTCTCACAAGAATTTTGATTACAAATGAA
>Marker89416	AGCTCTAAATTATCATGCTACAACTCAAACAAAAGCTATCCTAGCCCCATCACACGAGCTCTAAGAGATAAAGGGTCTGTTACAAACTATTGGCAATTAAXXXXXXXXXXGTTACCTATGTAACCAACCAAACAACCAATCAACTTCCTCAAATGGCATGATAAATCAGGCCTTAATGGTAAAAAAATATGTTGTTGTCCAACAAAACAT
>Marker159592	TCAATGTTGATGCCAAACTATGATTAAAACCAATCAATGGGATCAAGTATCATCTAAGATCTAGGAACATTGACCATAATGAATGGCTCTCAATTTGAGAXXXXXXXXXXTGTATAACCACTGTAAGCCCATTTTTTAAGCCTCCTTAGGATGAAACTTTATTTTAGTTTGTTATTACAAAATGCCCATGTGCTAGCCCTTGCAAAGATA
>Marker119772	GTAGTTAAGTAACCATGAGTTTCAAGGAAAGTGGGGATAGCAGTGCGGTTTGGACTTCAGTGGGAGATTGTTGGAAATGAAGCCCAACCGTCACTGCCCTXXXXXXXXXXTATCTTCAACATTGGTAATGAACATTGAAAAGTTATTCGCACATCAATATTACATTCTATTGAAAGGGTTGGGATTGAATGTGAACAACTAGATAAAATA
>Marker100994	TGTAACTCTTGCAATTTACCATCTTCATCATGTCAGTATTTTCATTTCTCAAAGGCATTTTAGCTAAATTTCCATACATTTCACAAAGTCCTTTTATGCAXXXXXXXXXXCATTACAAAATGTCACATGCATCTCATGTTATGTTATGTCTAACCAATGTTTTGTATCCAGTTCATAATCATTTGGCTCAATTATGTGTTTGAGAACATC
>Marker149559	GTTCCAATGAAGCTCAATATTCACCACAACATCTCCTTCGCAACATCACTGAAGAATAGTAGACACCTTATGTATTGCATCCAGTAGTCTAACACATGAAXXXXXXXXXXAATCACACTACTCCACACTTTCACAATCACCAAAAGCAACTCTGTAATTAGTGTAAACACCCAAGGTCAACCAAACCTGTGTTAACACAATGAACTTTTA
>Marker49920	AAAGATAATGAGTTTCCAAGTGCTTTTGAGAAAATTTGCTCTCCTAGTGGAAACCATGAGTTACAGAGTATCTTTGCTTATAGAAGAACAATCCAATGTCXXXXXXXXXXAAGTCTAAGATGATGATATGTGCCTTTAGTTCTAATGGTTCATGATTTGGTGGTTTGCAAGTGATCTTTTCTTTATGACAGTGGCTGACAATAATGGATA
>Marker148219	GCTAAAGAGGAAAGTGGAAGGGAAAAGGAAGAAAGAGGTGAACTAGGTTTCTTTCCGTAGACTGCTAGAAATTCTAAATCAACACTAGAAATTTTGAATGXXXXXXXXXXAAAGTAAGAAGAATTTTTGAGGAGGAAAATATTCAAGCAAACAAGGAAGCAGACATAACAACAGAGATCTAGAGTAATTTAAACGAAGTTTTAGGAGAAG
>Marker75827	TTCAAATCGTCACTATTGTAGCATATATACACTTATGATGTTCACTATAAACTGACATAAATATAACCTCACCTCCTGTATCTAGCTTTTGAAAACTATGXXXXXXXXXXTGTATAGCCACTTATTTACTTTTGTCTCAGATGCATAACATTTTGTTAGAAGAGTCTTAATCTTCCTGAGTAATCTATAGCTATACCTTGGATTCATGAG
>Marker50081	CAAGCTAAACTCAAGTTGGTGGTTCCAACCCTTCTCTCAAACATGCAAGAAGGAATAAGATAGACTCAATATCTTGCCTCCAAATCCACCACAATCCTTTXXXXXXXXXXTCCATAGGATATGAGAGGACACTAGCACCTGGGCACTAGGGTCTTGGATAAATCACTCTGAAAAGTTAGTATTGTTTCAGGACATTACCAGGATCTTAAC
>Marker494061	ATCCCAACAAGAGGGAGCCATAGCATCTCTCTATTCATATGGCATTGGTTGTGCAAGCAGAAGAACTCTTTATTTTTGTGGAGGAACAGTCAACTTGCTAXXXXXXXXXXGGCTGTAAGGAAACAACTGACTAATGTTTTCAATAACACAAGAAGAGTGAAGGCATTTGGCTGCTAGGAAACAATCAACTAGTCCTTTCAGGACAAGACA
>Marker124949	CAAGTGTCATTCATGTGGCCCTTAGACTAGACTGCATGAGAGAAAATCTATGAGAAGATTAGTGGTGCCTAGAGTCAATTTCTACAATTAGTCTAGTAACXXXXXXXXXXGGTCGAAGGACAATTGTGTTTATAAATACAAGATTCAAACTTCCAAATGCAGTAAGGAAATTGTTATGAGAAAAGACCATATTCTTGAATCTAAAGAAAG
>Marker234128	AGATTTGCTTCCTCTAGAAATCACCAATGCTCCTTTTGTCACCTTCCACATACTTGACTCAAATGTAATACTACATCCTTGAGTATCCAACTGCCTAGCTXXXXXXXXXXTTGCATCTTCTTCATAAGTTGTATTTGCCTCATTTTTTTTATTGATTTTCAACATTTTTAAATGCCCAACAATTTCTCTTCATGTAGCCTTCCTTACCAC
>Marker58201	TACTTTTTTGGGGAATCTAGACCTCCTTCAGACACTGATCAGCCCTGTAACTTCTATTTTCTAGAATCAGTCTGCGGAGGACACTGGAGTGAGCGCCCTAXXXXXXXXXXCAACAGACATAACACAAGGATTTTTATGTGGAAAACCCTGTTAAGGGAAAAACCACAGGGTGACTAACCCAAGATTGTATTATCTATTAAAATAATAAGA
>Marker337267	TTCACATCACACATACTTGTATAGAAGGTTGTGTTTTGTTCTACATATTTCACCTTCTACTTGTGAGCCTATGGATTTAGCTTCCTACACTTAATGATTCXXXXXXXXXXGCCCTACTTTTTAATATTTTCAATTATAGAAGCTTACATTTGATTGCCTCTAACAAAACACCTCTAGAGGTTATTTTGAGAATTCTTAAAAAGGATTAAG
>Marker252455	ATTGTCTTATGGTAAGCTTCATGTTTACTTACCTTCTAAGGGTTTCAAGTTGATACCTCTTTGGTTTATTCATAACACATACAATGTCCAAGGTCATTTGXXXXXXXXXXTGTCCATCTCTGTCATTCATGCTCCTCACATGTGTGACACTAGACATTTATGTCCATCTCTATCATACACACTTTTCGTGTGTGTGATACTAGACATTTA
>Marker211226	CTACTTAGAAGGACCTCACCATCACACTGTTTAAGTTTTGTGTTGTCCCAAAGAAGCCATGGCATGGTTAACATCTTGGTGAGAGCCCAAGACAGTTAGAXXXXXXXXXXAGCTCATGTGAACACATTTGCTGGGGACGCTATTATGTTATTAAAGGAAATATTGTATCTAGATTCAATTGTAACATCTAACATGTTCACTATTTATTGG
>Marker314283	ATTGAATATTTACATCTCCAATCTCCAAGTATATTCCACCTTACATGAAATAAATACCTTCTCTACACATGCTTCCACTCAAACTAAGATTAGAACAAAAXXXXXXXXXXTTTAATCAACAATAATAGTTATTACAATACAATTTAGGCAAGGAGCCTTCATAGGAGAAATCACCAACACTCATATCTAGAGGAATTCTAGAATAATAAC
>Marker174069	AATGATGCTTGCGGCCACATACAAAACTAATAGTTCCGACCATGGATGAATTCATCATGATGAGAACAAAGTATAGTTGACTTGGCTCGTTCCAGGAGTTXXXXXXXXXXCCAAAAAGGCATGTATCAATTTATGATCCATTAACACAGGTAACAAAAAACCAAACAGTTTATTGTTCATGGTTTGCGGCAACAAAGAAACACACGTCAA
>Marker104866	GATCATTGTCTACATTAAACTACCAACTGCACTTGCATAAGGCACCCTGGTCATGTCCTTCATCTTAGTAGGTGATTTTAGACAATTTTCAATAGAAATTXXXXXXXXXXGAAATAATAAGAAGTTGACCATTTTCAATTTTATAATACACACAATGATCTGATTTTGATCTCACAAATCCCAATGACAACACAAAACTATCAAACTTTT
>Marker164264	AACAAAGTTGTAATTGGATATATCATAATATGTCATCTTATATACAACAATAAGCAATTTTGCATTAAAGATTGTATGAATGGAAATAATGAGAAACAACXXXXXXXXXXCATATATAATTGCATACGAAGACTGTAAATAATCCAAGTAGTAGCTAATGTAGAGCAAAATATCCCAGTAGTGGTAGTGTGCTAAAAAAACCAAATTCAT
>Marker53760	CATCCTACATCAATCATCCATCCAATGCAAGGTTATGAGGCAATGTCGAGTTGACGGGTATGTAATTTATAACAATATAGTAAATATAGAACATGTAAATXXXXXXXXXXGGCATTATTGTAACCATTTTTTCTTCAATTCCTTTGATCGAGGTAAGAGCCAGTAATGTAAATGTCATTATGTATTTCTTGTTTTATCTCATGCCATTAA
>Marker113695	TAACCTCCACATTCTGAATTCGGCCCATAAGATTTTTAATAAACTCTCCCTAATTGGGGCTTTAGTGCTCTGAACCCCAGTGTTATTGAGGCCTTCTTCCXXXXXXXXXXTGACTTCGCATGATTCTGCTGGTAAACACAAAGTGACTTACACAATTGTTTGAACAAGCTGTTGATTCAATAATAAAGAAGACAAACACTGGAATATCTA
>Marker57371	ATAAGGTCTGTCTAGCCCAAAGTGAACCAAAAGTTAGAGAATCTGGATGAGAATCATCACCCTCTGAATGATGACTAGGATAGGAAGGAGGTGAATCCTCXXXXXXXXXXATTAGGATAGCCTACAAATATGCAAGGCTTGCTTTGCAGATCTAAGGCCTTACATTTCTCTATAGGAATTGGGCCCATGTAAGAGAACCAAAAATTCAGA
>Marker114559	CAACTTTTAAGAGCAAACATGATCTCAAATCCTAGAAATGGATGAACTTTAGGACATCATGGTTCTCATACCATGTTAGAATTTGTTATGATCAACAAACXXXXXXXXXXTGGTTCACTCAACCTAACTAAAACAGAGGTGGCCTTGACTAAATAGAGGTGGAACCTAACTACCATCAATCAAGAGTTGATGAGGTAGTGGTGGCACTTG
>Marker176375	TTTCAAATACCTCAGGATTCTCTTAACTGCCATCACGTGTGAATCTCTTGGATCAGCTTGAAACCTTGCAGCAAGACAAACTGCATGCATAATATCAGATXXXXXXXXXXACAATTCTTCTTTTATCTTGCATTGGATTTTCTTCTAGAGGAGTTTCTTTCAGAAGTTTTCTCACAAGATTCTTTACAACATACCTTATTACCGTATTCC
>Marker195962	ATGACCCTTGTCAAAGAGTGCAATTATCCAAACTATGAGTGCATTGGCAAATGCATGTCACTGTGATTATTGATAACATGGCAAATGGCTACCTTCTATAXXXXXXXXXXCAAAAAGATAAATTAACACATAGTATTGCACATACTTGTGAACATAAATGCTCAAGCTTTGGTCATTATAGAAAACATTTTAGCATGGAAATTGAGGAAG
>Marker130791	AAGATGAAGATACTGTCTGAACCTTTGTCTAAAGAGTGTATTACTGATGAATCACCACCAAAATTTGAAGCATCTCATGCCATGGTGAATAGGGAAGACAXXXXXXXXXXAAGTAGGTATCCACCTTATTTCTTTGAGGGGAGAAAAGATCCTCAGGGCATTACACTTTTAGTTTCCTTGTATAAATAATGATGCCGAATACAAATCTTT
>Marker117565	CATTCATTTAAAAAACTAGATTTCAATTAGAGGATTACTAGCAAGCTATTGTGTTCACAAGGTGATTCAAGGCTTCTATTGTGTTGCAAGAGCAGACTTGXXXXXXXXXXGTGATTATGGGTTACAAGTGTCACATTTGGGAAAAGTGGAGTTGTAGGAAGGATTGGCAGACATCAAGGATTCAGGATCTGAAGAAAAGTAGGACAAAGG
>Marker151420	TACTTGTCCTTCAATTGGTTGCACAAGGCTGATAGGGGCCTTCTCTTTGTGCTTTTTTGGTGACTCTAATGTTGCTAAATCAACAGATGGGAAGTGCCTTXXXXXXXXXXTTTGTAACACAATAGGCATAGGACTAACCTCCAACTACCTCTTCTTTAACCTAGTTTTGTTTGTGATGGGCATAACAACACTCTGCATGGGCTAATTAAT
>Marker275450	TTTAATCTAGCTATAATGAACTTTATGACTAACAATGTCCCTAGCACAAATGAAATTGTGTTCATCAAGAACCTTCTCACGATCACTTTACTTGGAATAAXXXXXXXXXXTGGGCTACAAATGACTATCAAAGATAGAAACAAAGAATCTAAATGGATAGCAATGATGAAACAATAGTTCAAAATAGGAACCTGTAGTCATAATGACACA
>Marker303460	TAGAATGATAAGATGAGCCCAATCTAACTCCATGTAGTTTCAAAAGCAGAAAGAAACTCCTGCATTGGAGCAATTACTTAGCATGGCCAAGAATACTGCCXXXXXXXXXXTAAAAATTAAGTCCCTTTGCAAACGTCTTAAGTCTGCAAATAAGCATAAAGCCAGTGTCTTGGAAAATGTCTCAGGCTCAGCAACCATAGGCAGATTGAT
>Marker73774	AATTTTTGTGGGTTAACCCCCACCATGGTTTTTCCCTTAACCGAGTTTCAACATTAAAATCTTGGTGTCGAATGTGTTATTTAAGTTTTCTGTTCATATGXXXXXXXXXXGATCAATTACCTATCCATGAATAAACTCCTAAATTTAGTGCATGTGAACCTCTATGTGCTTCGTCCACTAATGGTGGATCATGTTATGTGAAACATCAAT
>Marker401132	AGCCATCTCAAATATGAGAATTACTGCAGCTAGCTCCTCTTAAGTTTCTTGGAGATTCTTGAATGTAATCTCAAATACTGTTCATTCCTGAATCCTAATCXXXXXXXXXXAGATAATTCCATGACGGTTAGATAGTCACCAGGAGACATGGGAGACAGTAACAGGGATGGGGGCATCATTTTGAAATAAGGCATGAGAGTTATGAATAAG
>Marker213281	TATATGACACAACACCGAGATATTTTTATTTGATTTTATCTCACTAGTCACCTACCAACTCCATTAAATCCACTCATCTACCACCTTCATTTCTTTATTGXXXXXXXXXXAATAAAAATATTGTTGATTGGTCTGAAAAACTAATAAAACTAATTTAGTTCATTAAGTAGGGACCACAAATCATGATGTATCAACATGCCATAAATGATG
>Marker216324	CCAATTAATGACTCAATCACAACTTCAATTTAGTCATTAGATCATCAAATCATTCCTAAGAAGTGCAATGTTGGGAGATATATCATCTATGTCAACCAATXXXXXXXXXXTAGTTGATCTTCGAAAAAATACTAAACCAACTCAATCAAAGTCTATATATCATGTCAACTAGAAACCATTTGTCCTATGATAAAAAATGCCAAATTCAAA
>Marker514830	CCACCTCATCTACCACCATTAGACCTACTTTTTCCATGTGAGCAAAGGTAGTCCACCACCTATCCAATCAACATGTGCAAAAATATTGTGAGTCACATGCXXXXXXXXXXAATAATTGAGTTTATGACACCTCATGAGTATACAAAATGAGCTTATAAGATTACTATAGAGTATATTCTTGTTAGTTGTGTGAAAGAACTAAAAATAAGA
>Marker313204	AATCTAATGCTTAGCAGACGAGGAAACGAGGCAAAAACTATGTAACTGCATGTATTGTCTATCTTTATCAAGATAAGGAGAGATGGTGCTAGGTTTAGCTXXXXXXXXXXGATAGTAGTATCATATATGTTGTAACCTTCAAAGCAAAGGCATGTTACACAATCTGGAATTTAGTTGATAGTCTTACTCCATTAAAGATACTCCAATAAA
>Marker403560	CACCTTGGAAATGGAGATGAGGTTACCTTAATAGTGAAGGAACACATAAGAGGGGAAAACACGTGGAAAAGGGATAAGGATGGCATATGAATATGAAATAXXXXXXXXXXTATATAATCATGAAATTCCAAGGATATAATTACTAACATAGAGACATGGATCTTCTAATATGTCTTTTATTCTTCATTATTATGTGTGTCCCTGAAAGGA
>Marker304214	TTCATTAGCTATGTTGTCAATGTGAAAGGGTATAATCTTTGGGACCCTATGGCTGAGAGAGCTCTATACAACAAAAGTGTTATTTTTAGATAGATTAAGCXXXXXXXXXXCTAGAACTATGGAGGCAATGGATATGGATGATTATAAGTCTTGGAGAGAAACTATGGATGAGAATATGGATACATTGAAAAATAATGACACATGGGACTT
>Marker179416	ATAATCTGTCATGGTCAAAATGAATTTATGGCCTGCAAATGAATTTGGGTTAATTACACCTACAAAATCTAAGGCCCATTGGGCGAACGGTCTTACCTCAXXXXXXXXXXAACAATGTTGCATTTTTAATCATGAAATGAGCACTTTTCAACCTGAGGGCTCTCCTCTGAGTGGAATTCAAGTTGTCCAGGAACTTGTTGTTCAGGAGGA
>Marker181325	ACATTCATCAAATGGAGTTCACCAAGGTATAACTTTATGAATATCATAATACACTTCGCAATCTCCATGTTCATATATAGTTGCAGCCATAATCAATACAXXXXXXXXXXGTAGGTATTTTTCCTCCTTACTGTCTTGGAGTATTAGGTCATTAATCAAATGTATAAGTGTCTCAAACATCCTTATCATATATGGATGAGCAAACCAATG
>Marker153649	ACTGTAATGTCCCTAATCTAGATTTTTCTTAGTTTTTTTATTATTTTTTATTTATCTAATTTTGGAAACCAAAATGAAAATATAACTACAAGCTGAACTAXXXXXXXXXXAACAATTTTTGGAATTGATAATTTTCCACTCACAAGACCTCCTACAATTTGTATGGCTAGCAGATCTCGCAATTTCAGACCTGTAGGGCACGATAAAAAT
>Marker771630	ATACTTAATTCAAATTAAAGCTTTGGTCAAAGCATCATTTTATATGCAATACTATATCAACATATTATGTTGTAAGTTAGTTTACTAACTCACTATTCTTXXXXXXXXXXTTCTATTTACCAACAAGGAACAATACTATCTGAGTTAAGTGCTACCCAAAGTTTGCAACATAGTCGATGCATAGAGATAATATGTATCACATAAGATAAA
>Marker400178	TATATAAATCAATAACATTGAATATTGGGGAAATATCTATACCTACTAGAAGATTGATTTCATATGTATTTGATGAAAACTTTCACAAGATTCTGCATGGXXXXXXXXXXTCAACTTCTTCAAATTTCTTCTCAAGTAGTTGATGTATCCATTCATGTGCATCCTGCAAATTTGAATTTGTATTCCCCTGTCCACTTGTTTCTCCTTCAT
>Marker283403	TGAGTTCACAATCACAAAGGTAGCAAATTTCAAATATTATAAATTAAACCAAACTGTCATAAACTTTAAAAAATGTGGTTGTCCCTCTAAGCTGCTCTCTXXXXXXXXXXTTGGTGACATGCAAGGGTTAGCAAGCAGAAGAAAGAAAGTAGAAGCATATTTTAGCCATGTCAGAATTGCCATTTGTTGTAGCACATAAGCTGCAAGGAA
>Marker79004	TTATGTTGATGATCTTTTGATCAGTGGGAGCCATACATCATCTATTGAAGCAGTGAAGACAGCTCTTCAGGATAGGTTTGACACGACAGACTTGGGCTTAXXXXXXXXXXAAGATTCATGCAAGAGCCTCATGAGCTGCACTAGAAAAAAGCTAAGAGGATCCTTCACTACCTTCAAGGGACTCTCGAATTTGGGATTCATTACACATAT
>Marker59000	CCTCAACACTTGAAATGTGAATTAAGTAAACATATAGACAATCTAAACTTATTTTTCAAACAACAAAGCTAAATATTATAGTGCGGTGAAATGCGGTGGCXXXXXXXXXXGGTAACTTTTATGCTTTGAAATTTGAATCATGCATACTTCATAGTTGTATCTATCTAACCTCCAAATCACAAGACCATTTCTTCATCTGCGGTAGAATGT
>Marker154220	TTTCCCTTTGAGCTATCTACAACCCAATGCAAAATCTTTATCCACCGATCCTCCCGTTACACCATTCTAGGTGATACACTATATCGTTGGAGTCTCGATGXXXXXXXXXXCTTTGATGGCAAAGACATGCTCTTTGAACTATCTATGTTAATGTTGCATATGGTTAATGAATATTACTCCAAGGTGGTTATGAATGAGCAATTATTTGTG
>Marker30780	AGTGCAGACATTTTTTGATTTTGATGCAGAAAATTTCTAGAAATTATAGATTTTCACTAGTGACATTGCACAGTTCTCATTTTTGGAATTTCAGAGGATCXXXXXXXXXXGGGGGTTTCTTTGATTAAGTGAAAAGGTGGGGTTGTCTTGGTGGTGTTCTCTTCTTTTTAGCATTTATTTTTTGTATTTCTTCATCATGGATCAAACAAC
>Marker149477	AATATGAGTGAAGCAGAATGTGGGTATGAATCTTTCAAAAATTGTGGAGAAGAAGTTACTCCTGTTTTCAGTCATCAGATGATAAATCAAGAGGATTAGAXXXXXXXXXXATCAATCCAGTGCCATTTCAAAAATGAAATAGGGAAGTATTCCTATCAATCAAAGGCTATTTCACCTTTACATTTAAATGATTTAGAAATGATAAATTTT
>Marker269450	ATAGAGTCCCTTTTCCACATGAACTTTTTTTATATGCTCGGGTCTTGTTGGAGCTTATTAATGAGATTATGTGTATTCATGTCATTCTTCCATTATGATCXXXXXXXXXXCTATGTTTGACCAAATGAAGGATAGCCATAAATGGGCTTCAACAAATCCTTACCTTTGAGTTGGTGACTCTCAAATGCAATGGGCCTTCCTTCTTACATG
>Marker355482	TGAGTTCCACACTACATGTCTCGAGCTTGCATTTGACCAAACATAATTAATGAGACTATTTCCTAGAGCCTTGTAGATCAAGCATTCAAATGGTTCACACXXXXXXXXXXAAAAAGTAGGTTTCTCTTAAACAGGGTTAAGTCCTATTCTTTCACCTAACTAAACATTGAGAAGATAAGGACCGAGCTTGGGATAAAGCTACTAATCACT
>Marker624499	TTTTACACCAAATAATCACTTTATAATAAAATAATTAATTAAATATTAGTTGCCATAAAAAGATAATTCAGGACAACTTAATTTAATTAATTTATTTACTXXXXXXXXXXTGGGAGCCAGTCCTTAATTTGTTTCTCTAGAGTCACCGGGCACAAATTTGGAGCACCAACATAGACAATACTGCAAACAGCTGATTGTTGTGTAATTTAC
>Marker38269	CTAAGCAAGGCATTACCCATCTTGCACATGTATCATACCAACATGAATAAGAAACCATATTTCAAGAATATATTTCATTCAACTCACAAGATGCACACAAXXXXXXXXXXATAATCTAACAACATAAGATAGCTCTATCCCAACAATGCATAACAATTATAACTTGAAAGGGTTACCAATTATTCTATAATAGAAAATTCAGTCAAACAA
>Marker180634	TACTTTGGAATCATCTCTTCCTCAATCACAAATCATCATCTTTGCACATAAGTTTCAATAGAACCTTGTAAGTCATTAAGTTTTCTCCAGCCTCAAATCTXXXXXXXXXXAAATTTATGCCTTCTTGTGCTCTAGTTTCTCTTCATGTCCTTTTCCTTACCATTACTACATGTGCTCTATTATATATTAGAAAATGTTTCTTCCATCTTG
>Marker311709	TATGAAAATGAATGACAAAATGAGGAAATCAAGCATACTAATCTACTCCATTCATTAGTATAAAACACTTCAAGATTAGATAAAGAAGACTAAAAACATAXXXXXXXXXXATGCATCTCCCTCATATGGTATAAGAGAAAAATAAAATTAGATTTGCTTTTAACCTGATAGCAGGAAAGGATATTTTCCACAACAACTTAAACAAAAATG
>Marker245655	TGTTGTCCACACATCCTTAAAGTCTAAATCATCCAACTCCTTCATGGCATCAAACCTACTACTTTAGGGCCCTCATCTCCATTAACAATGTTTCTTTCCTXXXXXXXXXXATAAGCTAAGAATCTTCCCTCTTGGCTGAGAACCGCTCCTATGGCTATCCTACTTGCATCACAATCCACTTGAAACACTTTTGTGAAATCTGGCAAAGCA
>Marker292712	AGATTCCATAGAAAAGAGGCCCTATTTAAGTATATTATCAACATAGAAGCCACACTTTCCCCCCCAATCATCACCTTAAACACCTACATAGGGGAAACCTXXXXXXXXXXTAATTCATCACATCCTCTAAACCTTAAGCATCCATTAACTAATCAAGATCCTAATCCACATGACCCATGTGTTAGCCCTTTTTCATGAGGAAGCCATTCT
>Marker266642	ATTGTCATGTATATAATCATAACCTTTGTGAAGATGAGAATAATCTAGCATGTAACTTTGCATCTTCATTACCATTAAATGACTCTAGCATAAGTGTGTTXXXXXXXXXXGGAAAGCTAGTATGAGACATAGAAAGGATATACTCACTAAGTATAGCACATGTATCATGAGAGGTTAGGGCAAAAGTATCATCAATATAGGTTCAGGCGA
>Marker37794	TTCCTGATCAGTCGCCACCTACAAACATTATGTCCACCCATTTCATCACTTCCATCTGTTAGCTGTAGGAGTAGAATTAGGAACCCCCTGCATACTCTCAXXXXXXXXXXTGTGCATTAGAACTGGCAAACCCTAATGCTGATTCAGAAGAAAAACCAACACAATCTCCCAAGGATGACTAAGGATTTTCATATTGTAGACACACATTTG
>Marker60945	TGTTCAATATAGGGTGTATAATAATTCACTCAATAATCACTCAAAGATACATCATAATAAATTAAAAAAAAAATCCAAAGGAGAGTCCCCATAGACATCAXXXXXXXXXXCATGTATATAAAAATAATCTGATGATAAAAATTTGATATAACACGTAACTTTACATCTTCAATTACACTAAATGAATCTATTATTAGTGTTTGAAAAGAA
>Marker124950	TTTACATTTATCAATTGATTATATATCTATCCATGGACATGTTGGATAGGGGAGAGGGAGGTTTGTTGACAAACCTCAATATAGATGAGTAGATTTACCAXXXXXXXXXXTTTGACTCGGATGTGAGTTTTCTATGAAATTTTACAAGTGGATGGGTTATGAGGTGGCTAGTGGTTTCCCAACCCACCCTAGTTGGTTGGACCTCATCTT
>Marker339151	ATCTTTAATGTTTTCTCTCCACTATTTTCCAACTCACGCTTCTTATAAACCCCAGGGATTACCTAGTATTGCACTTATTAGGATTAGTGAGTTTGTTCCAXXXXXXXXXXGGGAGATCTGATTGTTCAATCGTCCACGATGTCATAACTGCAAAGAAGAATGGGACTTCTCTCAATTTCTTGGTTGTGGGAGATTGGGGCAGGAAAGGAT
>Marker79723	ACTTCTTTCTCAAGAATAATTTATTCTCTAGGGATTTAGTTTGAAAAATTTCTCCAAGCCTTTTCCAAAGACTTACTGTGGAGGTCTCTTCATGACCATTXXXXXXXXXXGCACAAGCTCTCACTCAAATGAAGATTAGTAGAAAAAATCATCTACCCAACAACCATGATCTGAGATGATCAAGCTCTAATACCAATTAAAAGGAAGAAA
>Marker221967	GACGTGTTTCCATCATTACCAAAGGGGGAGATTATTACACATATGGTTCTTAGAGTTTTCATTAATGTCAACACTCTCACTAGGTTGTCATTGATGTCAAXXXXXXXXXXCTATAGTATGTATGTTTCAAGTTTCATGATGGTTGCATTGCTAGAAGAATGTTTTGTTGTTGATTGTTTTAATACAGTGTTACTTCTATAAAAGATATTT
>Marker371717	TGCCTAAGCATACAGAATAGGATTAAGAAGACCAACACACCATACACAACTTACAATTTGGCAGACTTTTGCATAAGTGTTTCATAGAGGGGTTTGGAGTXXXXXXXXXXGGTTTTCTGCCGTTTAGTCATAACCTGCTTGCATTTTGATGTTGTTTCCATAACATAACATACATGCATGCATATATTTTGCAAATACAAAGAAAATAGA
>Marker564732	TTGTCATCATCTTAGTTTTACTACATCTTTTGTGCATTTACATTGAAAAAAGTGAAAATTTGAGCATTTTAGGTTCATAAGCAAGCATACTTTTGCTTTGXXXXXXXXXXCACTTTAACATTAAATTAACTCTATTTGTAGTGACACTAGTGTGTTTTTGGTCTTTGCAAAAGTCTTTGAAAACCCAATTTCCTCAAACTAGTGTTGTGG
>Marker164510	CATTATAAACATAAGTGAACATGGAATCATTGTGTAAGATAAGATCAATGTAAGCATATAATCAAGCATGATAAGCATAAGATATAAACATTAGAAACATXXXXXXXXXXAAATAAAATCAGCAAACCATAGTAACACAAGATTTACGTGGAGAAACCCTTTCGGGAAAACACCACCAATGAAAGAGGACAAGTGTGTATTAATCTTTAA
>Marker257982	AGAATGAATGGCTCGAAGCCTCTTATTAAACATATTTTGCAGCTTCAAGAAAAAATTTCTATAGTTGCCACTTAGAGAGAAAATGATGTTATTAATGAAGXXXXXXXXXXGAAAGACAGAAGCTGTCAACATTTGCATAACAAGAAAAAACAATCGAAGACATTATAGTAATGTCCGCAAAAGATCAAAATCAATCAATTGGACTTAAAA
>Marker151614	TTTACTGGACATTAATGACTGACGACATTTGTGGCATGCGTGGAGATTATACTAGACCCTATCATGTCTTGGGAGTGTCAGCTGCCTATAATAGCATTGTXXXXXXXXXXATGACCTATAGCTGGATGATGGAGAGTGTGACCTGCGATGAGGGATGCAGAGATTCGATGTGCTACCTTTGGTTGTAGTAGGAGTAGTGGGGAGCATTCT
>Marker163425	CTTTCATAGGGGATATTGTTGCAGGTGATGGAACAAGTTCATCTTCACTCTCAGATGCTAATTGGGTCAAGGACCTTCCACCTAGCAAGCATATGGAGTTXXXXXXXXXXCTTGATGTATGTCAATAAGGTCATATTGGGCCATTTGGAGTCATTATGAGTCTTTGAGAATCAACTTTGATATTTTGATCAAATATTGTAAAAACACCCT
>Marker191345	TCCTCTACCTTTGTAGTGTTTTCTACCTACATACACTTAGGAATAACAACAAAACAAACCTTCTCTTGCTTAACATTCTTCAAAAATTGCTTACCATTTAXXXXXXXXXXATTTATGATATTTTTGCAACCAAGATGCTCTATAATAATTAGGATTATCTATCCTTCTCAAATTCAAAATTTCTACCATTTCACTTACAACAAGGTTATT
>Marker149504	TGTTTCTCCTGGTTTTGCCCTATAGACTACTATTTCATGCCTTTCCTACCTTAAGATTCATTCCTTGTTGTTTCTCTTCATTTTTCCTTGCAAACTATTGXXXXXXXXXXAGACTGTGTAAGTTTTTTTCAACCAACATTTTAGATCAAACTCTATGATCCATCATCAAAGTGAGATTTTTGTGAGAATATATACTACACATGCATCTTT
>Marker361049	ATACACTACATGCCAAGTCCTTGATCTTAACCTTCCATATAACATCTTGGTCACGCATGGATCCATGCTATGCAATTTGTCCCTTCCACTTAGCATCAATXXXXXXXXXXGATACAGTCTTATGGATTAGGATATATGCCTCCTAGTTTGGAAACCAAGGATTATCAGGCTCCCTCTACAAGTCAAGGTGAACCCTCTAATGTCATTGAA
>Marker422236	TTCGAAAGGTATATTGTGCATTTACTATCTTCTATAATTATATTTCATTTAGCTTTAGTGACATGAAATGTAATATTTTATCAATTTTTGATATAATGAAXXXXXXXXXXTTTACTAATCCACTATTCTCATTGACTAGTTAAATTGACTATGTTTGTGACTTGAAACAGTCTCAAACATGTTCATTATGATGATTTTTAGTAAGAATGA
>Marker77749	TTATTTGCATCTCATTAATATTTTTCACCATTCTGGTGAAATAGCTTTGCTTCTCCTATATTGTGAAGGTTTATCCTGTAGGTTGTGCTCCTTGGAGGTGXXXXXXXXXXCACCGAGGATTCAATTCTCTTGAGTTTTTGGTTGCTGAGAACCCAAGGCCTATTCAGTCCCTCTCCAATCCAAGTCTTCATATAGGTCTTCACTAGATGT
>Marker306823	TTCTCATTATTATACATTATGCCAACAAATCTATCAATTACTCCTCAAGCTACTGATGAAAATTATTTATGATATCATGTGTGCAACCAAAACTAGTGTTXXXXXXXXXXGTAATATAGTATTGATTCTCTAGTTTGGAGATCCTTTAGTTCATATGATAGTTATGATCATTGAATTGCCTTCCACTTACATATTACACACACCAAATTG
>Marker126088	AGATACCGATGACAAGGGAAAACTAGATCTAGATGCAAGGAGAAAGATGGGATTAGATAAGTGAACAAAAGGATGGGTGATAGCAAATGGGATGGATAGAXXXXXXXXXXAGAAAGGAGGATGGATTGGATCAAGGGGATAATAATGCGGATATAATGGATAAGGAAGATATGATAGGAAGGATAGATTATTTTGAAGTCATAAAGAAGC
>Marker92379	ATGCTTGTGTATTACATGTGTCGTCCTTGTGTGTTTTTTGGGTTTTAGTGGTAGCACGTAGCGATCAGCTCCCCCCATGTCATGTGTCTTGCATGTTTTGXXXXXXXXXXTGCCTAGGATTCGAGGCTACAGATAGTCTTCCAAGTTTAGGGTGTGCCTTTGGATCTAGTGCTTGGCATGTTTGATGTGTTTTGACCATACTTTAATGCA
>Marker418230	AATGTTGACATGGAGTTATGACTTGTGGGTTGGAATATATGCACTCACCAAGACAAAGATCCTATTGATGAAACCATGAAAGCCACTGAACAACACTTGAXXXXXXXXXXCCAGCTCTGCTAGAATTCTACATTCCACATTGATCCTTGTTTGTTGAACTGTCCTTGCAATACCCCAACTATCCAACAAAGGTGAAAGTATGGATGCAAG
>Marker178911	CTACACACTTCATATGCCTCTGATTTTAGCTTCACTTGATTGTTAAGAAACCTCAACACCTAATGAATAGTATATAAAGGAAACACCTTTGGTAACAAATXXXXXXXXXXATCCAAATCCACATGTTTGCATGCAATGTGTTAGGATTTAGTGTGATATTCACTTGCAATCCTATGTATAATGTTATTGTCTCCAAACATCTTAGAATGG
>Marker283446	ATATTACTACTGCTGATTTTCAGGGTTTTTGATTTTGGATTGCTGTTATCAATCATATTCAGCTACCAGTTTGTAGATTTGTGAAAAGTTTTCATGAATCXXXXXXXXXXGCCTTTGGTCTTGTGGGAGTTTGCAGATATTTTTCGTCATCATCACAAGCATATGGAGAGCCGGTGGCCTTCACTGCTTGACCCAAGTCGAAGATGGAAA
>Marker157921	AGTGGAATATAACCCTGTCACGACCTTGATGGCCTCCTTGTTGATTATGTGTGGGACATCCAACCACATGAATTTGTCATGCATCCTACTCAACACATATXXXXXXXXXXTAGATTTCAACGGGTGCTTCTTAAATTTTGGTCTAGGTCTATTTAACACATAAATCACTTGAGGCTTAAACATTTCCACTTCTTAATTTCTTAGATCAAG
>Marker299064	AGATTGGATATTGCCCAAGCAATGGGAGTTCTTGTCAGGTTTGTGTCTAACCTTGATAGAGAGCATTAGACTTGCGTTAAGAAGATATTTAGATATTTGAXXXXXXXXXXACATGGTTATAAAGATTGTGCTTGGGAGTTGGTTTTGATTGTAGGGTGGTTCAAATTGGATGTGACAATGAAAGTGCTATTTGTTTAGCCAAGAATCCTA
>Marker136697	ATATATTTGCACCATTGCTCCGGTGCCATCCCCTCACCATCCCTGAATCTAGGCCCTTGGTCAAATGAGCAAAGGAGATTTGCTGTTGTGAGTTCAACTTXXXXXXXXXXATTGTAAAATCCTCTTCCAACTTCCTAAACGTTTCTTCTCCATCGTCCATATCTTTGTCTCGTTCTCTTGCCATTCTTTTTTATGCTCTATTCACTCCCT
>Marker430312	GAGGTTTGCATGGCTTAAAGTTCACCCCATGAATTTATTTCACGTGGGCATTCAACATTTACTGAACTTTAATTTAGGGAAACACAGTCATAAACATTAGXXXXXXXXXXAAGACTAAAAAGGCAAGGGCTATGAAAACATCCCAAGACAATAGGTGAAGATGAGGCAAAAATGCATAGAAAAAAATTGCACAGCAAGGATGAAACAGTA
>Marker336653	ATAGTGAAAACTTGGCAAATAGGTGCTATGTGTAGAGTCAGTATCCACCATCTATTGAGTCTTTGTCATTCCATATTGTTCATAATAAAAACATCCATCCXXXXXXXXXXCCTTGTTCAAGGTATGACCACATCATCAATCACACTTCATCTTATCCTACATCATAAAAAACTCCTAGAACTACATATAATCATCTCATCTCAATCTTAA
>Marker121974	TGCATTCTGCATTTCATATGGGAAAATCAAAAAGAAAACAATCAATGCATTCATTGTATTCTCTGTGCTCTACGTGCCTTCAATGCTATATTCTCTATGTXXXXXXXXXXGACTCTCGATGAGAAAACCCTTGGGGCTTGTGAAAAATAGGAACTAGGGGGTGCTAATTTGATGATCCTTGAACAAAGATAGGGGGTGAACAAGGGTGCT
>Marker160188	GTTTCTACAAGTCAACAAGGTCAAAATCAAGCTTCCACTTCTCAAGATATTCATATTTTGCCAAGAGGACAACAAAAAGCTGAAAAAAGACAGTCTAAAGXXXXXXXXXXATGCTTACCAATGAAACACAAAATAACAATGAACAACCAAAACAAGTGATCAAACCACCACCTTTTTATTTTACCTTGATAGTTAGTGATCATTTAGTAT
>Marker228668	TATATCCAACTACCCTCGAATCCGCAATATCACATCTTCAAATGTGGAGAAATGTAGAGTATTTCTTTGACTCATCCTATTTGCAAAAACTTTGAACCTCXXXXXXXXXXAATTAATACATCATTCACCACATCAAAGATTACAATCACAACACTTTTCATCAGAATCAAGAATCTTCATGTTAGCACAACTTTCATCTTTCCATGATAA
>Marker81641	ACTCTACTGTGACTCTACATATGATTTTGAGATGGAGAACCGTCAATTGATATGTAAGCTCTTTCTGGAGTGATCGATTTATTGAAAGAAAAAAAAAAGGXXXXXXXXXXTAATATTAAAAAATTGCTCCAGAAGATGCAACGCTTTTGAAGAATAGTTCAACCTAAATCACCCATTCTTCAGCACATTTGAATGTCCAACACTATTATA
>Marker581640	AGTCCATTTAATTATACAGTGGAGGTGGAATGGATGATTGCACACGCCCCAAACTGCACAAGCATCATCACAAAGCAATTAGCCATTTAGAACATGGGGAXXXXXXXXXXACAAAGTTAACATGCAATGTGCATTGTCAATAAAAGTTCAATACAGATAAACCAAAGATCTGACAGAATTTTGAAGCTAAATATCTCATATTTAGATTTG
>Marker91272	GGAGTTTTTTCCCAATACAGGAAGCAAAGAATCCATCCAAGACCTACCCATTTGACCAACTACCTAAAATATAGAAGAAAAGAATCATGAGGTAGGACCAXXXXXXXXXXCATAGGTGCCATATGAATTAACACTTAATACACCAATAAAGGTCAATTGCTCTCAGGGGTTTGTCACATAATTTACAGAGAAAATTCTTCCAGGTTTGCA
>Marker88680	ATTTTGGGGATATGCTCAAAATAGTGTATGAGTGCATCAACATGAGTTTTAGTTGTTTTGGAGGTCTGTAAGCTTAGTTTTCAATTGACAGTTGTGATATXXXXXXXXXXAATGTTGTTGTTATGAGGAGTTCAAGGAATGTTTGGAGATGATGCATAAGTCATTTTGACTCACCTAGAAGAAGAACAAGAAATGTTTTTTCATTTCATG
>Marker276906	TGTTTGTTGTGGCATCTAGGAATTCAAAATGATATCTAGGTAGGAAGCGTGTGGGTCATGGACTGTATGTAGTTCTCTTGTGCATAATGTTGTTCCTCCCXXXXXXXXXXTCATTCTATGATTGGAAAGTTTTTTGGTAGAAGGCCCAACATCAACCTTGTTCTTCATTGGGCTACACACAAATGGAAGACCAAAGGGCACCTAGAGGTA
>Marker433250	TTATTAGTCAAATTATATAGTTCTTTGATCAAGGTAGTCAATACTCAATTACTTCATAAGCATAATCATGGTTTCATCAGTCTATTGTAGTTTTGTCAAAXXXXXXXXXXTATATCAGTGCAATTTTGAACAAGTCTTATCATATTCTAAAACACTTTGCATACAAGTATCTTTAACATATATCCCTATTCAAGAGGTTAAACACATACA
>Marker213294	CATATGGGGTGGGTGAAGTAGAGTAGATTAACGATCAGGCACTAGAAAGACTCTCCCGAGGTATATCATGGAAATCTCTATATGATAGAAATCAGAAAATXXXXXXXXXXCACCAAATAGAGACCTAGAACCAGATGCTCAAGGTGACTTGAAAATAAAATGCTTCAGAGCACATTGGGCCCTCCCAATATCCCCTTCAGTTGTCTTGCT
>Marker219810	ACTGGAAATCGGTATGACTAAACAAAACGTAGCAAGGGAAACACAAATCAAACCAAACCAGCCTTTCTCACTAGCTCTCTCTCCATCCTTCATCATTTGTXXXXXXXXXXAGTAATCAATTCAATAGGGCTATGAATGCCCCAAAGTTGACTAGAATTTAAAGGTTGTCATCTGTTTAAGAAACAAAGCCAAGCACTCACAATTGAAGAA
>Marker441797	GACCATGGCATACATTAGACTTCCAAAAACACTTGCATAAAGAAAATGACACATGTCCTCAATATCCTCTAAGTGTTTAAGGACATTGTTCTACAAATAAXXXXXXXXXXATAGCACACTAAAAAAATGGTCACCCACTTGTATGAAATATATTGTGATCAAGTTTAATTCATACAAATCCAAGTCCCAATAGAAAAGTATTCAACTTTT
>Marker183425	CAAAGTTGTGCTCCTTTAAACAACAAACCATCTTGCGATAGATAGTCTAACCATTTCTCCCTATTGGTAATGATAAGCTACATGCAAACCTCATAGACTTXXXXXXXXXXACATGATTATTTGTATAGACAATAAACTTCTTAGGTAGAAGGTAGTGTCTCCACTTATTTAGGGATTGAACCATTGCATACATTTCCAAGTCATATGAAG
>Marker147306	GACCTTCAAGATGCATAAGGGAAAGCTATTTTTTGTCCCCCTTTCTTAGGATAAAATGCTCTCCTAGACATGTATACAGAATGTGGAAGCACTAACAAGGXXXXXXXXXXACCATATGCTTAGAATATAAGAATAATCATGGCCTTTATAGTGATAAATTTCAAATGTTTTATAAAAGAGTCTCTAGTCGCTGTAGGTAAACCATGCAAA
>Marker126122	CACACTTGACTAGTGTATGTTGTTACATATGTTCCCTTGTCTTCCCCCTTGTGTGAAACCAAATCTAGAGTCTACCAATGTAAATGCTTGTAAAACAAAAXXXXXXXXXXGAAGGATCTTTGTTCAATCTATGGTTTCCATTTATTTTAAAATAGGAAATTTCATATTGTTTTGATTTAATTTATTGTTATGAAATTCATGTTTACAACT
>Marker143799	ATAATTTTATGTGATCCTTCCTCCATAATATTTGTAGTTAGAATATTTTGTTTATGTGGCACCTTGTTGCAATGCTAAGTGTCATACCATGACTACACAAXXXXXXXXXXAAGCTTGGAAGAAAGATCTTGACTCTATCTTGTTCACCAAAGTTGAAGCTCCTTGCATGTTTGGGAGAAGGGTTGGAGCCACCAACTTGAGTTTTCCTAG
>Marker534903	TCAAGAATGTGAAGTCTTGAGATTAGAAGAGAAATGTCCACATGAAGATATAACTTGCAGCCATGGGATAACAAGTAATACACTTGGTATTCATCTTGACXXXXXXXXXXTGTGCATCATAGCATAGAGGATGTAAAGAGGACTCAAAGCATGTGTGATGAGTGGCTAAGGAAAGCAAGAGAGTAGAGTTGTTGATTGCCCAAGCAAAGC
>Marker473161	TATTTATATACCTCTTTCATCTAGCACTATTGATCCTACTACTACCCCACTTAGCCAATTCACTTCTACAACCACTATTTACACATCTCATGTGCCATTGXXXXXXXXXXGACTTATCCATTGCCTATGGGATTTTTGGCACCTAGGTTTCCAATTTATGATAGCAAAGGTGACCCTAACACTCACTTATATCTTATACAAATATATGTG
>Marker344505	ATGGTAGGATCCCTTGTGCATACAGAACAAATACAAAATGAAGGTAAAGATACAAGGGATGCAACCAGTACAGAAGATGTAACCAAGAAATTTGAAGAGGXXXXXXXXXXACAACAACAACAAGAAGAACAATAGGAACAACAACAACAAGGAGAGGTTGAAACAGAGATACCTCATGAAGAGGTAATTGATGAAGTAAAAACTATAGAA
>Marker80304	TTTCTGATATGATTTTTTGTTTTAGGGCTAAAGTGAAAATTTGAACTTATTAGGGTTAGAAATATGGGTCAAATGGATGTATTATTCTAAGCGGGGAAATXXXXXXXXXXCTTAGTGACTTGGTATGATTCTGCTGGTAAACACAAAGGGACTTACATTAGACTCTTCTTCTTTCACTTAGCTTATTCCTCCTTCAGTGTGGATGACATA
>Marker131979	TCTAATTTTTTATCTGGTTTTTATTGATTTTTTTCATCATTAAGTCATATGTGAATTTTGTGTGTGCTCAAATTGTTTATGCTCTCTTTTGATTACCTTTXXXXXXXXXXCTTGGACACCTTATCCTTCATAAGCAAACTCATTACCTTTGACACTATGATTCATGATAATAATGCTCGTTTTATGGCATATGATAGTGATTTTGCTTTA
>Marker218599	TCAATGGTGGAGGTGATTGGAGAGCTAACTCATTTGATTGAAGAGTTAACATGCTTGATTAGAGAGTGAACTAGGTTTGATTGGGAGTGAACCAACCTTGXXXXXXXXXXCACCCCTTTCACTAGGGCAAGTCACTCCTAGAGATCTTTCTTAAGTTTTTGGGTCACCCAAGGAGATCTTGAAGTCATAGGAGCGACCCACATGAGGTTT
>Marker271458	TAGTTGCTTTGATCAAATTGCTCTTTCATGGATATTGTAACACTTATAGTTCTTTGTCAGGAACACTTGCTACACCCCTTGAGAGGTAGCTCTCAAAACAXXXXXXXXXXTTGAAATGTTTATGGCACTTGTATTGTCACAAAAGATTGTAATTGGATATTCCTACACAACTCTTATGTCCTTTAAAGTCTGCTTCATCCATAACACTTG
>Marker293162	ATTCTGCCCTCTTATGTGGCTCAAGCAAATGTTGTGAAAGCAAAGGGTCATCTTGAATCCTAGGTGGATTGGAAACACTATCAACCCTGCGGTGCTGATAXXXXXXXXXXTATAGCCAGCAAAGAAATATCTAACACTTTTGGATCTAGCTTATGTCTTTTTTGCTCAAGAACCAATGTGTAAGCAGCTGAACCAAAAACACAAAAAGAA
>Marker280859	TAACCTCAAACAAATGTTCTCTTGAACATTGACTAAGAATGAGAGAATAGTGCATTTGATAACACAAATCTTGCTGCAGCTGATTAAATTCCAAACACCAXXXXXXXXXXTTCAAAGGAGAAATCAATTTCAAAAGGAAGCAAAAAAATTATATTAGTTTCCATAAGCTAGATCAAAGAGACTAAAAAGTGAATCCAATTACACTACACA
>Marker201936	ATGCCACATACCCATACCTATCATCTTCATTATAACCCTTGCCTTAATCCCACCATGGGGCCACATTTTAACTCTTCTAACCACTTTCGATCACGTCATAXXXXXXXXXXCATAGGGAGCATCCACTTCTATTATTCCTTCAATGGCCCCATCCCTTGCCACTGAGTTCTAGGTATCTAGCCATTCACCCCTCCATAAATTTCCATCATT
>Marker215493	ATCCTTATTAAACCTCTTCATAGTTATTGCATCATCCATTGATCTTTTTCCTTCTTTCTAGTGGTCTTCATAAAAATCTAGTAGCTTTCAATAACTATATXXXXXXXXXXGTCACCACACCTTAGCTTGAACACCACCTATTTTCACCACTACATATCAGCTCAGCTGGTGGCGCCACCAATCCACTGCCCAAGAGCCACCACGAGGCCA
>Marker182136	AATTGGAAGGTTCTTTGCATGTAGGTGTTATCATATGGGTCCTGGACAGCTATGAACGAAGAGACGAGTCTTCTGCCAATATAGAAATGATGTCAAATTTXXXXXXXXXXCTCCAATCTTGATGTAAAAAATAATAGCACATGAATAAAATCAAGTATCGAAAAGAAAGGGAAGGAAAAGGTTTAAGGTGAAAATTAAATAGGGGACCAT
>Marker192838	ATTGACGGGGTGTAATTTTTTTGAGGTTATGGGGAAAAAGTGTCAAAATTTGACAAATTGACAGTTAATACTTAGGTTCTTGGGCCTTTTGGACGTGATGXXXXXXXXXXCAAAAAAGAAACCCTCCTAAATATGGTGTTTCTATCAATTTTTCTGATTCTCTAGGTCATCATTCAATGCAAGAGAAGAGCATACTCAACTTTTCAAGAT
>Marker110937	TCAGAATACAATTGGTAATATGCAAGGACATGTTCAGGATTTTTTAGAATTCTAAATGGCTTTTTGGTTTGAAGACACCATTCAGGGAGTTCCTTTGCTTXXXXXXXXXXGTATGTTGCAGATCTAAAGGAGTCATAAGGATTGTCAGGGCAATCTCAATCCAGAATTTTATCCATCAGTGACAAAGGGAGTAAAAGTTATGAGCATCTG
>Marker336071	ACAACACAAATATGATGAAACTGAAGATTTGATCAGGAGTTGCATAAATAATGTAGAGAAAAACTTGCGAAGAGATGCATGGCTAAGAATTAACTTAGCAXXXXXXXXXXCAATGGCTCATGGACCAGTCCTAAGGAAAGAGCAAATAGCAATTCAAGTTGATCCTGCTCCTTTGTTTGACTCCCCTATGACTGAAGTGACCAGGGAGTT
>Marker375023	TATCAATGTTACCATCAGAACCTAACTTATTTTTGAACACCCATTAGAAACCCATAGTTTTATGTCCTTCAGGAAATTGAACCAAGTTCCATGCATCATTXXXXXXXXXXATCTAATCCAACATGAACCTCTAGTTCATCATCTAGTGCAACCTTCTCTCTTATGATGTAGTTACCAAACTAACTTCCCATCCTCCTTTGGTTGTTCAAT
>Marker445249	AATGTGTGAGCTGTATTAGGTAAATCACATTAGGTTTGTAACGTGCTATATGCTTTGATTTATAAAAAAATCAACATAGAAAAAGATGGAAATGCAGACAXXXXXXXXXXCATTAGATTACAGATATTGTTGATGGCTCAGTGTCAAATGTAGGAAAAACAAGCTTCTTATTGTGGTCGAAATCTGATTTGGTAAGTTTGAGAAGACTTT
>Marker87591	CCTCTTCCCCCTCCTCTTGTGGTTCATTGACCTTCTGTGGCTATTTTGTTCCTCCTACCTCTTCAGTGGCATGAGGAAAGTATCTCGTGTCGTAGAACCCXXXXXXXXXXTATATCTACCCCTTGATCCTATTTTTTAGCCTGTGTCTCTTCCATCTCCAACCCCTCCTTCTCCTCCACAGTTGGATTTAGATGAATGCCACCCTCCAAG
>Marker99719	TAAGAATAAAGCAAAAGAAAGCAAGTCAAAAGAGGCATCCACCTCTCAAAAATCCCAACAATCCTCATCCATTCATAAATGCCATTCCATTCTAAAAACTXXXXXXXXXXTTCCCTATGGTCCATGCTTTTGCATAAGCCTTCCATCCATAAGTCCTACATAATCCACATCATAATCCACTATCATTCTCTCCATAATCTGCTATCTATG
>Marker212820	GTGGCATCCAGATAGCAACAATAATGAAGCAACATTATAAAACTTGTCAAATAAACATACACATACACAAGGTGCAGTAGTCATGTGTATGTAGAAAATCXXXXXXXXXXTAAGAAGCAGGTGGAACATTCAAATGAAGAATAGTGATATAGTCATGCATAGTAGCTATCAAGAGAAACTCAAGGGGGCATTTATACCAAATGAAATAGA
>Marker395212	CTTCCTCTTCCCATTTGGAACTTTTGATTATGCCATACAGGCTAAGTTACAATGATATGAACAATTAGATGACATGATTTTAGTAATGTAAAAATTAAATXXXXXXXXXXACACAGGTGAAGGGAAATAGGTAGAGGTGTATAAAGAAAATATTCAAGTTATGTTGTTTTTATACTTTCTAACTTTCCCCTATACTAAGGAATATGCTTG
>Marker428305	TATGGTTTTAACGCAACTGCTTCTGTGTTTGCCACCGTTTCAATCAAAGGAGACTATGCCATAGCTGAGACAGACGGTGATTTTATATGCGCTACCTTAGXXXXXXXXXXAATCATATGTCCTGTTATTGGCTTTAATATAAAAATCACTTTACTCTGTCTCAAGTTGTTCAGAAAAATGAATTAAGCTGCCTTAAGCGTGACATTTATT
>Marker239825	AGTTTTATTTTTCAATAAGAAACGGGTAAATAATCAAAAAATACATAAAATAAATGAACCACAAAATATCAATGCTGAGTAACATGGAAGTAGTTAAAAAXXXXXXXXXXCAAGAGCTTTACTGTAGGCTGCAATGAAAGAGACTCTAAAATTCTAAATCAGAAAAAAAAAAGAATCAAGTTATACTTATTATTAAAGAATTGCATAAAT
>Marker307836	TCCTTCTACGCTTTAAGCTCTTTCAAAAAGATCATCATCTAATATAACGTTTTTCCACAAGAACTAACGTCAATACCAAATCTTTGTTTATGTTGCAAGCXXXXXXXXXXCATACATAATGACGAGCACTGCACACAAAAACATCAGATTCAAACCCACTCTCACAATATCATCTAGAATTTCTTTTCCTTGTTGCAAAGCTGACAAAGC
>Marker560747	TTCAACAAGTAGCTAGTTCAGGCAGCCCAAATTCATATAAGAGCAAAAACATAATAATAGTAGATTGACAAATACTCAGAAAATTACAATCGACTTAGGCXXXXXXXXXXCACCCAGCTGCAATGATATTCAATCATATTTGTCATTTTGACGCCAAGCAATTAAGAAAATGTTGAAAAGCCTGCTGCAATCAGACTCACGATTTAATGT
>Marker295314	ATTGTCAAAAACCAAGGAGGAAGGGATGCCAAATCATGAGATTATACTATCCTGAATGAAGCAACAAATTACCTCAGCAGTCATGGATCGTAGCGGCATAXXXXXXXXXXCCAAAATGCCCTCCATGGGCACTGGAGTGAGCTTCTTCTAAAGCAATTAGAATTTCTGATTTATTAAGACAACAGAGAAGAACGCTATTATAGCTTCTTC
>Marker398402	ACTTCCAAAAACGCCTCTCACAAGAGCAACAAAATGCAGAGGTTGGATCAAGAGTGGATCACAACATCCTTGGAAAACTAGAAAGGACAGCATTTGTGAGXXXXXXXXXXTTTGGTATCATTGGTAGGGTTGAAACATGCGAGTGTGCTTTCTCAAGTTGTTGTGATGGATCAATAGCCTGCTTAACAAAGTTAAAGAAATTTTCCATGG
>Marker389978	TGAATGCATTATCCAATATTTCTATTCATGTTAGAAGTTTACTCCAACCTACGTTACAATCCAAGAGAAAAGATACATCCCTCTAAGTGAGAAGAAATATXXXXXXXXXXGACATGAATCAATAAATTGCTCTGGCTAGAGACTTAGACTCATTGGGACCAATCTGGGTCTTGAGTCACTTATAAAAAATTATACAATATGCCCATATAT
>Marker166986	TGATAATTCAATGAAGTAGATGTCACATGAAGTATTATGAGTTTATGCTTACTCTTAGGTATACCAGTTATTACATGATACAAAAGAGGTTTAAAGGATGXXXXXXXXXXCAATTAGAGTGCTTCTAAATTCATTCATTAACAATATATCATTATCGATATGCTCAAAGTATACATGCAAAAATGACTTAACATTAAAAAAGGCATTGCT
>Marker232955	AAACCCTCTGTCTAAACAACATGCTTTGTATACCAATCATTCCATAACAAACATCATAAGCATGAAGATCACAAGTTGGAGCATGTGGTGAGATTTAAAAXXXXXXXXXXTTGATGGACATGTAGCACAACACCTGTTGCTTTCTATTATGCTCTATCCTTTGCAAGCTTAACTATACTTGCACTCATTCACTGCTCAGTCATCTGTGAT
>Marker348495	CTTGAGTCCCATTTACCTAGTTTTGGTCATCCATGAATATTAATATAATTTTTTTCTTTCTGTTAATGGCATCATTGTTCTCTGAAGCTTCTCCTTTTTCXXXXXXXXXXAAATGTCTAACTCATTAATAGTGGGTTTAATATTTTATTCTTATGCCCTCTGATGGTTCCACACAAATGGGGTTAAGGTTTAAATACAAGCCACACCTAT
>Marker366479	AACCTAATGCATGCAATGTATCCCTCTCCTCTATGCTCAAATGATCATCCAACCTCCCTCACATATAAATCGGTGGTAATCTAACCTGCACTCGCAAACAXXXXXXXXXXGTCTTTGTTTTACAGATGCATTGCATAAACACAAATGCGGTGAATGCGACGACAGTTGTGGTGCAGAAAACTACACTACATCTATTTGTGGTGTAGTTCT
>Marker520630	TCAAAGACTCTTAACATGATGCTCCAAGCCTTACCACTGGAAAGGTGGGTTGGATCAGATTGTTGGTGGGCTGGAAGGTGGCTGTAACAGTCACATTTTGXXXXXXXXXXCGCCCTTACTAGCTGAGAACACTTCAGCAATGGTAATGGGCTGAAAACTCCTCCACCATGTGATTGAAAACTCTTCTTTGGCTGCAAGGTAGTTGTGGGA
>Marker148075	TCCTCCATGCCATCTAAATCCACCAACTCCCATCATAAACCTTATCATATACCCAAAACATATTTTACCATTCCACCTCCATCATCCTACAAGTGCCAAAXXXXXXXXXXATGCCTTAGGACATCGATTCAAAAAGTCAAATAAAAATCCATCTACGAAGCTATCCAAGCCCATACCTCCAAAACAAAAGTTAAAAACTAAAATGGTTTG
>Marker176347	AAAACCAAAATTATCATGCACATCTCATAGATTTTATTTATTATCATCATTAATAATCATAAAGCCAATCATGCACATCTCATAGATTTTATTTATTATCXXXXXXXXXXATATTATTAAAGACCAAATTCTATGCAATATTAGATTCTTAATCATCATAATTTCGAAAACTAAGCATGTAATTCTTTCACATTAAATTTCTAAATATTG
>Marker63832	CACAGATAGATTTGAGCTTCTGCTCCTACTTAATGGCTTTCTCAAAGACTTGATCCATGGTTGTAGGTCCATGGACATCCACTTCTCCATCAATCTGAGCXXXXXXXXXXCATGTGGATGCTTCTCCATCTAACTGGTATGCTCCCCGTATAGCCTTGGTGATCTCAGAATAATTTCTTGTTGGTATGTGGTGATTGATCATGCAAATAC
>Marker315252	TCTATTGATGATCTCTCTTTTGATGCCTTTAAAGACCCTTCCTTAAGTTATGATGAGGTTAATACCCCTTAAATGGATACTTTTTTCTTGAGCCTCCCACXXXXXXXXXXAGCCTTCTCTTCCTCTTGAGACACCTTTATCTACCTTCCCTCCTATAATTCCCCTCCACATAAGACATTATTACCTCCTTCTAAGCTCCCTCCTCCTTCT
>Marker156050	TAGTCATTAACACTTTCACTAGGATCTTTCTTGTAGTGTGCTAATTGTATGAGAATTACTTTATGTTCCATATTATATTATAAATGTAGTGTAAAGGTATXXXXXXXXXXGAAATAGGAAAAATCAAGCATGAAGGTGTGATACAAAAAGTAGGAGAATAAGTGAGAGCATCCAATTTCACATCTAGCTACTTTGGCTTAGGGATATGAA
>Marker108245	TGCAAAATTGTTTCAATTTGGACCTATAAGGTTCTATTGTTGTGTTATCTATGTTATTTGTTTGAGTGCCCTTACTTCTTCTTGTGAAAAGAAGTGTGTTXXXXXXXXXXTGTATTATCTTCAAATACGAGATTACAATACATATACTTCCTCTTCTTCTTCAGTCTTTAATCCAATAGTGCATGTTACTCTCAACTCTAATAAAAACGT
>Marker291356	CTCTATGATGCCCAATGCCCAAGAGTCCTACACATACTCAACTAAAATCATCTCTCTCCAATCAGCTGTAATCTTCACTAAATCACACAAATGAGGTCTCXXXXXXXXXXCTGCTCTCAAAAAGCAATGGGATGTTCGTCCTACATCAAGACAGCTCCTATCCCTTCACCAAATGCATCACACTCCAACTCAAAAGGTTTGGAGAAATCC
>Marker357200	TAGCTTCTAGGGTTCAATAGAATATTCTATGATAGATGGCATTCTATCATTCATTTTTATATTCTATGCATGCTAGTCTATCAAATGATACCATGTGTTTXXXXXXXXXXTAAAGATGATCCAATATGTAATGAAGCTATACTAATCATTGATGTGTGCTTAATCCTAGATTGTGTATCAAAACACAATCATGCAAGCCTCATGGAACTT
>Marker133281	TAATTTTATTATGAGAAGGAAGGTTGTAAGATAGTATAAAGTTCATTTAATACATCAAGTCATTAATACATCAATCAATTATTTTATGCCTCTCAAAGTTXXXXXXXXXXTTAAATGAAAATATTATAGGAGAGAGAATCAGGAATCATGAACACAATAACCAAATTAACTTACATCACGTCATATAAGAAAACCACATCACATTACAAA
>Marker319913	TGCATCCTCAAGAGTTATATTATAATTTTAGTATTGTATTATATTGTTGTATATTGTAATTGACGCAATCGGTCATGTAATCTTGTATTTAACCTTTGTAXXXXXXXXXXAGTCTAATGCTCTAGGTTTGCATGATGGGGCATCACAATTGACCCCTGAATTTCAAAATTTAAAACTTATAATTGTCTTGACTCTTCCATGAGCTGACTT
>Marker260428	ATTAGACTAATTTGAAGTTAATTTGTAACTTTTACACAAAATATACTTCCATGGGTATCATTTCCAGAGTTATACAATAGTAGTTTGAATTGGTATCACTXXXXXXXXXXGTAGTGGGAAAATAAATTCAATGAATGTTTGTTACCTTAACATTTATTACCTGCATCAACATATTTTTGATTTGGGTTAGGTTGTCGGGGCTGCCATTAG
>Marker775980	GAGGCTGCAAAAGGCTTGGATAAGATACAGCATGGCTCTGAATCTATGTAGAGAAAGTTGGTTCTGGCCTTGCTTCCTCTCATGGCTCTTGCAGCAAAATXXXXXXXXXXACGTTGCTGTAATTTCTCCATGGATGTAAGTGATCTCAGTAAAAATGCAGATCAGGCCCTCGGATCTCTGCATACCCACAACAGAAACATATCATATATT
>Marker287329	TTCATACAGTTGAATCAGCTTAATATAGAGGCCTATGCAGCTAGTTTGTCTTGATCTAGTGACAACTCTTGGGGTCAAGTGTATATAGAGTATGGATGTAXXXXXXXXXXGTTCAGATTTGAAGACCCTATTTGCAGCAGTTGCAATTGTGTAGTCTGTTGTAGTGGGTAAGTGGCAACCCTTCAACTTATGCCAATAGATTGGTGTCGA
>Marker343066	TATGAAAATACAAAAACATACTAAGGCAAAGATCAAATATGTCAACTTCCACTGGCATCCTTCTTTGCATGAGAAAATAGATAGGGTTTGGGGGCAGCGCXXXXXXXXXXTGGGGCATGAGTCCAAGATGGACGCCCATCTCTAAAAGGTTCCATTTTTGCCTTGTAAACTCTATATAAACAGTTGCTTGGATGGAAGATATAGAACTTT
>Marker296627	CTTAAACCCACTCCCCATATTCTTGAGTCTCATCACCTTCTTCTTGATTCCTATCCCTCACCTCCCTACCTCCTCCTTGCTCATCTTGACAACCTAAAATXXXXXXXXXXCCATGAAGATGGTAATGTGGGTGTTGTCCTTAGATTAGCCCCATGTATAAACAAAAACATTATCAACAAGGGCGAAGATCCCACTCACTATCACATTTGG
>Marker402565	TAGATGCTCATAACTTTTAATCCCTTTGTCATCGAAGGCTGAAATCTTGGATTTAGATTTTCCTGACATTCCTCTACACTCCCTTAGATTCACAACACACXXXXXXXXXXATAACAACAACCAACAACATACATAGTTTAATCAAATACACCAACTAGCATCTTTCATTACGACATCCAAATACATCAAGACGTTTGCACTAAGATTACA
>Marker433736	GATGAAAGCGAGGAGGAAGAAGAAGATTTTTTCCCTAGCAAAGAGAAACATGATCAAATCACAAAACAAGCAGAGAAAACAATAAAGAAAGAGCAACAGAXXXXXXXXXXGATGATCCCAAAAAGGGTATGGGAACAAATGTGGAAACCTAAGTTACATGAAACACCTTATAATATTCGTTTGGTGGATGGTTTTGGGATGACAACATTA
>Marker469167	TAGAAAAAGGATTTACTCTATGCAAGTGTTCATTCATTTATGCATTTTGGCCTGAACTAAAAATAGTGAGACCAATTAGGTGTGTCAATCTTGTTATTAGXXXXXXXXXXCCAATTCCAATATCCAAGAGTATGTCATGGGTTCAAATATTAGTGTGCCAAAATTTTGTGGTATCAAAGTCAATACTGGAGTTTGTCATGTGGACATGCT
>Marker109215	TGGATGGCTAATTGTTCTTGGTTCAGTGACAATATTTGGAGCCAAGCCAGTAGATTGGGTTTAGTCATCGGCATTTTAGTTGATCATCCGGTTTATTAAAXXXXXXXXXXTAACAAATACCAGCCTACCCTAGACATAGTATCCTTCAAAGGGAGTTGACCAAAGGTCAACATCTAGGGAATCCTAGCTCCTCAAAGCGTAGATAAAGTG
>Marker300697	CCAAAATAGAGAAATGGTGCAGGTTGGTTGTTGCATGTGAGAGGCCATGAGAGGCCATGAAAGGCCAATAGTTTCTAATTATTTGTTGAAGATTAATGTAXXXXXXXXXXAGTGAGGAGGAAGTCCCTGAGTGTGTAAATAGATCACCAAATGTGAGGCAATTTGCACTAGGACTTGTGGACAAATAGATCATCGAACAGTGAGGCAGTT
>Marker218197	GAAAAGATCTGACTGAAATGGCTAGACAGGGTAAGCTTGATCCAGTCATAGGACGTGATGATGAAATTCGTAGATGCATCCAGATTCTCTCAAGACGGACXXXXXXXXXXAGCTAGTTTCTCTGTTGTTTTGACAGGCTTGCTCAACGAATAGTGCAAGGAGATGTTCCACAGGCATTGATGAATCGCAAGGTTATGATTTTCTGTCCTT
>Marker271015	AAAGCCATGCTCCCAGTAAATACTAAATATCAATAGCATTAAAGTGCTCATTACCTCCACTCACATCCACTTTAAAAATCTATTCAATACCAGCAACTCTXXXXXXXXXXTAGATAGTCTGTGTTTTTGCAAATTTCACTTCAAAGAACTCTAAATTCTGCCCGATAAATTTCACTGAGAATCTATAATTACGAAACAGAAATTTTAACT
>Marker413207	CACAAAGGCAGCTACAGCAGTCCCGGTTGATCCAACGAGTTATATTGGCAGGGTTGATAATGTTTTAGCAATCAGACATTGTATTTCCAGGTTCTTATTCXXXXXXXXXXTTGTGGTTTTGAGCAAAATCTTGGCTGGGGATATTACAAATTGTTTCCTCATCTATTGGACTCCTTATCTTTTGGGACACAAAAGCCTACTAATTTGGAA
>Marker407577	AAAAATGAAAGCATCTATATTTTCTTGAGAACCTACTCCAACCTCTTCCAACATTACATTCTTCTATTTATCCACCTCTGTTGTGTGACCTCTTTTCTTCXXXXXXXXXXGTTTGATAGACCAAATGAACAACTAAAAACTAGTGGCTAAACCCAACTCATTGACTTGATTCCAAACATTGTCACTAAACTAAGAACAACTAACCACCTA
>Marker329347	TTTCACCCCTCTCCACCCAGCCCACACGTGAAACACTCTAGCAATCTGGGGGGAGAGAAATGGAGGGAACTCAATAATTAATAGAGATAAGGAGGCAATAXXXXXXXXXXTTCATTCTAAATCCAAATACATCAAATGAATCAACACATACATTTACTTCATAATATTTCATCAAATGAATAAACATTAAGATATTGAATAATTATTACA
>Marker672191	TTGGAAGTTAGATTTTTCTCAAAAGGTTGTCCTAGGGTATATCTGTGTCACTTTTGTTATCTGATTGTTCTATTCTTCTTCTCTCATTCTCATTCTTTTCXXXXXXXXXXTCCAAAATTACTCCTATCATAGAGTTTTGTGGTGATGGAAGGTGAACAAGTTTGCTAAGACCATCCACAAGCCCTATGCTTGAGGTAGAGGAGATCTATG
>Marker56966	ACGAATTGTTGTCCTCAATGTTATGCTTCACCTTCTCTTCAATGTCATGAATGACTTGAGCAAACTCTTCCCCATCTGCACTCCTCTTCTCCATTCCAGCXXXXXXXXXXATAAGCGGAACTAAAATTCAAATTTGTGCCCAATTTCCTCCATAGAGTCCTCCAAAAATGACCCACAAACTTAGTATCCTTGTCAAAAATTATACTTCTT
>Marker158392	ATCCACTCCCCTTTTATATAGAGTTTCTCTCCAGAGAACATATTTACTGGCGTTTAACTTCAAATTCCTTTTCTCTCTTGTTGATAGATGAGGTGGGCACXXXXXXXXXXAGAACAAAAATGATAGTATGGGAATGAAGAATATAAAACTTGAACTACTTCACTGCCTTCACAACTGCATAAGCATGTTTTTCTAATGGGGAATAGGGTA
>Marker307547	CTAACAATGCACAACATACACAACTTATGATATAGAGAGAACTAAGATCAATTAAATGGGAAGGAATTTTAATTTTTAAATAACATCATTCTATCGTTTAXXXXXXXXXXACCATAAGTTTAACCATACAGATACAATTATCAATTTAATACCTTAAATTGTGTTGTTCTATCTTGCAACGTTCCAAATAACTTTCCTTACTCACATGTT
>Marker163551	TTTTTTGGGTAAGTTTTCTTAGCCTACAACTTACACCAACATCTTGGCACCATTGATAGGGATAAAGTTACTTTATTTGTTGTTGGGTTATAGGCAATTAXXXXXXXXXXAAGACTCTACTAGTGAGTTGAAGCTAGAATACATTTGTGGCCTTGAAGATCATTTATGCTTCAAGGATTTCCTTTTGTGATGTCAAAAAAGAAGTTTAAA
>Marker339149	ATCTTTTGTTTCTAAATAATGTAGCTTCCTTACTTTATTCCATCTAAGCCAATAATACTAATTTTCTTTTTCAACAATACAAACTTACTTCTATTGAGGTXXXXXXXXXXAGTTGGGCCCTATTATAATACCTACTAGGGTTCATGCCATGCTTGGAACTATTTATTACAATCTTTTATTAGGTAGACCATGGATTCATTCCATAGGCGC
>Marker195256	TGTTATGACACCTTGGGCACATAAGAGTGTTGTGTGGCTTTCTTGATGCCACTTTTGTATCGTGAAAAATTTGTTTGTTTGGTGTTTGTCTGTTAATGTCXXXXXXXXXXTTGTGCTTAAAATATTCTTCTAATGCTTTACTTGGTTCCCCCTAAGCCTAGCCTAATTCATGCCCTTAAAAAAAATCAAGAAAACCATGAAAATATTCTA
>Marker258407	TGATATTTGGTGGTTGATTGAGGTAAGAAACTTAAAATGTTTGTAATTTATCAATTTTATATTTTAACATGTTACTTTTATTATTTAATTTTTTTATTTTXXXXXXXXXXTGTGTAACAAGGATGGTTGGAGTTTGATCAAATACTAATAGTGATAGCCCCAATGAAACATAATTGTAGATCTAGTTGTTGACAACTATAACCTTATTGT
>Marker297011	AAATACACTTTGATATATTTTACAATCCTTACATGAATCAACTAACTATTACAATACCACACTAGCAAGTGTGGCCTCAGGAATAAATAGAGCATAACCAXXXXXXXXXXATAGCATTACAATACCCTCAAAATGTCTAGGTGGAAAAACACGGGTCATCTACAAGTGTATAAGTCACCTATGTCTGCTAGCATCATCTTCACATGGCAT
>Marker196144	TTGAGCATATCATCCATCATCATTGCAGGTATGGCAACTATGGTTGTTCACTATTGAGAAGCAATCCACAATTCAACCAAGGAATCAATACAATCTAGGTXXXXXXXXXXATATAACCCACATCCATTGAAATTGAAAACCCCTCCTTTTTCACCACTAAACATTTTGGTGAACCCACATTTTATTTGAATTTTGCACCTTGTTGAGTGT
>Marker155846	AGTGAAAGAAGGCTACCCATGTGAGGTTGAGGATCGTGAATGACTCCTCGAGGAACTCTGTGATCATACACTCCTAAGCTCCCCTCTAAGATCTCTCACCXXXXXXXXXXAACATGATCTATTTTAGCTTCCATAGCCACCATGTATCTCATGAAAGGAATAAATATCTCTGTATGTCTCCCTGCTGAGTGTTGTGGCAAGTATCCCATC
>Marker116146	AGAAAGGGTTTTTCAAGAAAACCTTTCTATGAGGATTGAGGCTCAAGAGCAAAAGATGAGGAAAGTAGCCCAATCAATTCCTTCAGGCAGCCCCTTTCTTXXXXXXXXXXAGATGAGCCAAAGATGGAGGTGGAAGAGAATGAAACTAATGAGTAGTTTGTTGTTCCTACACTCACAGTGGTGGAATTGTTTGAACCTATTGCACCTATG
>Marker132654	TGCAACCATTTTAGGTTCTTCATCCAAATTCATCCCCAAAATCAAACATATCTTAATCATTCCCACCTCACCAAAGTCCAAATTTGAACATTCCCAAGTCXXXXXXXXXXGTGAACCTGTCTTGAGGAAAAACTACCAAACACATCATGACCTTTCCCCACGAGTCCAAGACTTTGCACAAGATGTGGAAGCCATGGAAAGTTTGCATCA
>Marker294640	CGTAAGAAAACAAGGATGTGATCTCAAAGACTATGTCACATAAGAACAACATGCCCTATTCTTGGTGTAATACTTAGGATTTTTCATGACAACGCTTATGXXXXXXXXXXGATGGGAAGTGATAGGTAGGATGAGACAAGGTGCCCCCAAGTGTAGGTGACATAGAAGATCAGACTTACACATGACACCTGTTTGCCAGGTTTTCATCAT
>Marker641058	CTAAATTTTTTTTTTTGCTAGATAAGTGTAATCAATATGTAGAGACAACAATAAAAGATGCTAGTGACTTGTATGAATTTTGTGTAACTTGGCCTACAACXXXXXXXXXXCTGAAACCCCTACTACTTTTGACAAAGAAGAAGAGTTGGTATCCCAAATTAATGGGCACATACAAATTTTGAGCCATTCTAAGGCAAGATGGGATAAATA
>Marker323671	AAGTCCCATGTGTCATTTTTCTTCAATGAAACCATTGCCTCATCCATTTCCACTTTCCAACTCTATATCATCCATACCCATAGCCTCCTTCACTATCTTAXXXXXXXXXXTCATCCTTCTCTAACTACAATATTATAGAATAAGTTTTAACTTCTCTAAAGATAACAATTCTGCTATACAAAAAAATTTCAGCCACAAAATCCCAAAGCT
>Marker425835	TCAAAATGATGGCAAGTTTGACTCTTTTAAAATGATGTGCCTTGTTGCCACGTGGTGTTGAGGCCTATCAGGTGGGCTCATCTTTTTTCAAGGCTAAGGAXXXXXXXXXXAAAGGGTGATGACTCAACATGGTGGGCCCTACTTCTCATGGAAGGAGAAGCCTATGGGAAAATCCAAGTCAAGGCATGGGAGATTTCCATGTGGTAGCTT
>Marker162391	ATAGTCTTTGAGGACCTATCTAGACCTTTGAAAATGTATTTAAATCTTCTAGGAGGCACAAAACTTCATCACAAAGCTACAAAAAGACCTCATTAATAAAXXXXXXXXXXTTTGATGCCATGGACATATTTATTACCATTGGCACTTAGGTAAATATGCTAACAAAGAAATCATCGATTGAGATGGGTTATATGAAGTTCAAATCATCAT
>Marker251803	ATTGGTCTTGTTGTTTTAAACTATTTTGTGATTTTTAGTCTCACTTCTCATGAGACTCTCTCCATCTTCTTGTGTGGCTATTTTTTGTAAAGGGTCTGGGXXXXXXXXXXCAGAGATTCTATAGGATCATATATTCATATTGAATTTATCATTTATAGATTATATTGTTTCATCATGTCATGTCTTAGAAACTCTAGATTTGATCTTATA
>Marker192531	ATACATGAGGGATAAGGAAAGACACTAGATGAAATCATGGAAAGATTTTTGGATAGTTTGATAGAAGCATTGATACATTGTCACCAGACAAGAAAAATGAXXXXXXXXXXCGGAGAACACAAGGATGGAGGAGACAAACACACAACAACAACAAATGAGCCCACAGACACATAATGTGGAAGAAAAAGAAGGAACACAGAAGAATATGGA
>Marker176499	TCATAAAGTCATGGGAAGGACAATAGATCTCTTTAAACAAACCTAAACGAGAGTCTCAACCTAGTTTAAGATGAGTAAAATTGGAGTTTAATATTCAAATXXXXXXXXXXTCTCACACCAAGACATTCTTGCTTCTTAAGGCTTGAACCAAGGAATTACAAAATCAAAACTTTACTACAAAGCTAAAAAAGTATAATCCCACTATGTATG
>Marker263581	AAGCTTACAAAAGAACGATATCTGGTGTAAGGAATGAAATGTTCCTCAAACTTTCGATCTATCTGCGAATGCATATGTGGCTCCGTTTTAGAGTGGCTAAXXXXXXXXXXTACAATGTGGTTATTAGAGATTTTTTATAGTAATGTATTCATCACTTTTGTTCATTTAAGTTTTATTTTATATACTAATATTAAGTCATTAAATACAACT
>Marker459403	TTGGGAAAGCCATTCATGAGGGAAAATACCAAGCCTCCAAAAGAATCCACATTATTATTAATTTCATAGTCAAGATTATAATCTACCACAAAGGCACTTCXXXXXXXXXXTAACTTCCCCTCATGCCTTGTTCTCAAACTAGGTTGTTGATCCTCAACAATCATAAGCAATGTATATATTAGTCTTAAACCTCAAAGATGACATGCATTG
>Marker385970	TCTTTAGAGAATATAAAGATGGAGGAGAGGAATAGAATAATAAATAGAGAACCTAGAGGACAAAGGAGATGGAAGAGAGGAGAACACACAGGAACACAGGXXXXXXXXXXGATCTGGTAGACACATTGGCCAATGAGATGCCAAAGACACTAAGATATACTACCTTACCCCTGTCGTAGCAGTTGAAATAGTTAACACAATGGTTCAAGG
>Marker574822	TGCAAAATGGTTTCGATCCATGCAAGAGTTTGTTTGGCCCAACATGATTAAACATATGTTTTGTCCATGCAGGCATTACAATATGAACCGCATCAGGTTGXXXXXXXXXXGTTCTATCACGTGTCAACAATATTAAATCAGGATGGAAGAGCATGTTCATGGTATTTTGAATTGTTTTTTTGGACTTTCACGCTTTATAATTTGAAGTTG
>Marker305614	CACTCTCCCATGGCAGTGACCTTGTTATTTGATGCTCTATTTATTTTCAAGGATAGCAACCCTTCTATGGTAGTGACCTCTTTCCTTCTCACCCCCCATTXXXXXXXXXXTCTTAATTCAGCGCTGGAATTGGAAGGACACCCACTAAAAGGTTTTTAATGACTTAGGCAACATCATATATTGGAAGTATTTATTTCCTCTTACACATTA
>Marker218013	ATGAGGATGACCAATAAATATACATTTAGGATTTTTAGGATATCTAGTTCTAGCCTATTCTTGGTTGAAAGGTTCTTGATTGTTCATGCATGGGTGATTAXXXXXXXXXXTATTGGTTTTGATTATTTTGGACTCAGATTGACCAAAATAAAGTGTATGCAAAGCCTCTAAGGGAACTTGTGCCACTCAAGGTGCACCTACAACACTCAA
>Marker320714	CCAAGTCACCTCCTTGAAAAAATATCAAATCTCCTCATGGGAAGCTACCACTAGAAACACTTGTTAATTTAGATTCATTGAGCATGTGTGCAAGAGGGCTXXXXXXXXXXCTGATTAGAGCTCACCGACTTGCAATTTTGGAAAGCCATCAAATCTCTTCCTGGGAAGTTGTAATTGGAGGATTTAGTTCATTTAAGCTTGATGAATGTG
>Marker140966	AAACCAAATTGGAGATGATATAAAATCAACACAAAGAATTAACGAAATAGAAGATCAAACACATAACATAGTGTTTATGTGGAGAAACCCTTTCAAAAAAXXXXXXXXXXATATAAAATGTGGCCTCCGAGAGCATTGCCCCCGAACCCCACTGAGGTGCACATCCCCTAGACCCCTCGCTAGGGGGACATCACCCTAGACCCTGCAGGG
>Marker309671	CACTAGTTATGTGAAAGTAGGTAGATGTGGTAATTAGGATAGATTCCACCTAAGCATAAGAGGAATTGACACAGTGATGTGAAAGAAAAAACTTGAATAGXXXXXXXXXXAAAACCTTTAAGGTAAAAAACCCCACACTCTAAAACCTACACAATATATTATCAAATCAAAAGATGATTACAACACACTTGAAATGCAAGTTCTTTCGGG
>Marker547875	AATAACGACTGCTCCTGAAAGTATTTTCTTGCTCTTACAGGCATCCAAAAGTGCAAAAATCCAAAAGCTTGATCCATGGAAACAGAGTTTACAGATTAGCXXXXXXXXXXAAAAAAAATTGCTAGGATGTATTTCACATTTTCTAAACGTTTTGTATTTTCTTAAACAATCATGGTTGCTGTGGTTAGGAAGTAACCTGCAACTTTGGTC
>Marker298029	GTTATGCTACCAGAATCACTCTAGAAATGACATTTGAAGACTCTTGGAAGAACTTACATTGCAAGTGTATTGTAAATTGTTATTGTTTTGATAATACATTXXXXXXXXXXCCCATAATCACACAAGTTCCCACATGAGCTACACAAATGTGGGGACAAATGATGCCTACTACTCTCACCCTCATTGGCCTGGGTGAGATCATTGTTGTGT
>Marker212868	TTGAAATTTTATCATAGAGGAATCGAGTCTTTGCCTAATATTTTCTTTAAGGTTGCCATGAGTCTTTTACCTTGGCCAAAGGACAAATTAAAGTAAATATXXXXXXXXXXTGAGCTCGTGGCACTGTAGATTTTAGACTATTTGGTCAGCTCTCCTTGAGCCAAAGCTTCCCATTTTGCTTGGTGTATTCTCTATCAAGGTCTTTTTGTT
>Marker143014	GGTAAAAGTTGTTTATTTGTTTAAGTTGATCAGAGTTGGTTATGGCATAGGAGGATGTGTCATGTGAATTTTGATAATATCATCAAGACAAGAAATATTTXXXXXXXXXXAGCTTGATCAAGATTCAGAAATGTAAGAAACTCCCAAAGTTCTAAGGTATGTAAGACTGAACCACTCTGAAGATCAGATCATAGGTGACAAAAATAAAGG
>Marker632750	GGCATAACTTTGGACTATGTTAACATTGTAAATTGTGTATATTTTCTTTCTGATAAAAGGAAACAGCTCATTCTTGATTCAATGCCTATCTGTTGTCGGAXXXXXXXXXXGAGATCAATACTAATTGTATGCTAATATGTGATGCCTGTGAGGCAGCATATCATATATATTGCCTCTCACCCCCATTAGATGAGATTCCCAGTGAGAGCT
>Marker361931	ACAGTGCATCTAATGAGACTGTCAACTATTTTTGCTCCACTTATGCCCACATCCTTCTGGAAATGGATTTAACCAAGGGGGTGCCTGCCAAAATTTCTCTXXXXXXXXXXGCCCCCCTGCTGCCGCTGCACCCCCTTCTTCTGTTTCAAATGATCCTCCTGTTAATGCTCAAGCCATAGACTCTCCTGAGATTGTGGCAGTATCTGAGTT
>Marker232712	ATAACTTTACCTGTAAAGGCTGGACCCATGACATTGTCTACTCTTTTTCATGTCATGCCTAGTGCTCTATCATATAACATGATTCTTGGAAGACCGTGGAXXXXXXXXXXGAATCTATAATGGTGTTCTTCTTCATTGTCTTAACAAATTAGAAATTCCAATTGCTCTAGAAGAAGCTCACTGTGGAGGGCATTTTGGAGGGAAGTCTTT
>Marker454069	AATGCTAAATATATGGCAAGAGAAGTGCAAGTGATGGGAAAAGGCATGATGTGCCCAAATGCAAGGTTATGTCAATGAAAGCATAGTATGTAAGCGAGAAXXXXXXXXXXTTTGTTCTTATTTGGCCTTGCACCTATTGTAAATCTCTATAAAGACATTTAATTTGTATTTAAGTTGATATATTCCCATCCATTATTGTTTGCTTCTATA
[truncated: 62 more rows]

## Sheet: LG7
>Marker126872	AATGTTTTGAACTGCCCCTTCCATTGATCAAGAGGTTTCATCTGTTTATCATCAACTAAAATCTCTAGCATGATCTTCTTATGAATGTGCTCCAACAGATXXXXXXXXXXAACCCTATTCATCACCTTGGCAACTCTATGTGTAATTCCCACTCAATAAAATATCAGTAAACAACAATGAATTAATAGTTAATCATAAATAATGAAAAAT
[truncated: 242 more rows]

[truncated: 4 more sheets: LG8, LG9, LG10, LG11]
