# Supplementary material
Source: MDPI journal article supplement (https://www.mdpi.com/1999-4907/14/8/1591)
Supplement: s1 [file s1 › File S2 Markers genotypes of per SLAF marker for each F1 individual.xlsx]

## Sheet: Sheet1
MarkerID	Type	aa	ab	ac	ad	ae	af	ag	ah	ai	aj	ak	al	am	an	ao	ap	aq	ar	as	at	au	av	aw	ax	ay	az	ba	bb	bc	bd	be	bf	bg	bh	bi	bj	bk	bl	bm	bn	bo	bp	bq	br	bs	bt	bu	bv
Marker309219	lmxll	lm	ll	lm	lm	ll	ll	lm	ll	lm	lm	ll	lm	ll	ll	lm	ll	lm	lm	lm	ll	lm	ll	ll	ll	ll	lm	ll	ll	ll	ll	ll	ll	ll	ll	lm	ll	lm	ll	lm	ll	ll	lm	ll	ll	lm	ll	ll	lm
Marker238503	lmxll	lm	ll	lm	lm	ll	ll	lm	ll	lm	lm	ll	lm	ll	ll	lm	ll	lm	lm	lm	ll	lm	ll	ll	ll	ll	lm	ll	ll	ll	ll	ll	ll	ll	ll	lm	ll	lm	ll	lm	ll	ll	lm	ll	ll	lm	ll	ll	lm
Marker259018	lmxll	lm	ll	lm	lm	ll	ll	lm	ll	lm	lm	ll	lm	ll	ll	lm	ll	lm	lm	ll	ll	lm	ll	ll	ll	ll	lm	ll	ll	ll	ll	ll	ll	ll	ll	lm	ll	lm	ll	lm	ll	ll	lm	ll	ll	lm	ll	ll	lm
Marker414446	nnxnp	nn	np	nn	nn	nn	np	nn	np	nn	nn	np	nn	np	np	nn	np	nn	nn	np	np	nn	np	np	nn	nn	nn	np	np	np	np	np	nn	nn	np	nn	np	nn	nn	nn	np	np	nn	nn	np	nn	nn	nn	nn
Marker423500	hkxhk	kk	hh	kk	kk	hk	hh	kk	hh	kk	kk	hh	kk	hh	hh	kk	hh	kk	kk	--	hh	kk	hh	hh	hk	hk	kk	hh	hh	hh	hh	hh	hk	kk	hh	kk	hh	kk	hk	kk	hh	hh	kk	hk	hh	kk	hk	hk	--
Marker553080	lmxll	lm	ll	lm	lm	ll	ll	lm	ll	lm	lm	ll	lm	ll	ll	lm	lm	lm	lm	ll	ll	lm	ll	ll	ll	ll	lm	ll	ll	ll	ll	ll	ll	lm	ll	lm	ll	lm	ll	lm	ll	ll	lm	ll	ll	lm	ll	ll	ll
Marker135520	lmxll	lm	ll	lm	lm	ll	ll	lm	ll	lm	lm	ll	lm	ll	ll	lm	ll	lm	lm	ll	ll	lm	ll	ll	ll	ll	lm	ll	ll	ll	ll	ll	ll	lm	ll	lm	ll	lm	ll	lm	ll	ll	lm	ll	ll	lm	ll	ll	ll
Marker149295	nnxnp	np	nn	np	np	np	nn	np	nn	np	np	nn	np	nn	nn	np	nn	np	nn	nn	nn	np	nn	nn	np	np	np	nn	nn	nn	nn	nn	np	np	nn	np	nn	np	np	np	nn	nn	np	np	nn	np	np	np	np
Marker28115	nnxnp	np	nn	np	np	np	nn	np	nn	np	np	nn	np	nn	nn	np	nn	np	nn	nn	nn	np	nn	nn	np	np	np	nn	nn	nn	nn	nn	np	np	nn	np	nn	np	np	np	nn	nn	np	np	nn	np	np	np	np
Marker329826	lmxll	ll	lm	ll	ll	lm	lm	ll	lm	ll	lm	lm	ll	lm	lm	ll	ll	ll	lm	lm	lm	ll	lm	lm	lm	lm	ll	lm	lm	lm	lm	lm	lm	ll	lm	ll	lm	ll	lm	ll	lm	lm	ll	lm	lm	ll	lm	lm	lm
Marker546396	lmxll	lm	ll	lm	lm	lm	ll	lm	ll	lm	ll	ll	lm	ll	ll	lm	lm	lm	ll	ll	ll	lm	ll	ll	ll	ll	lm	ll	ll	ll	ll	ll	ll	lm	ll	lm	ll	lm	ll	lm	ll	ll	lm	ll	ll	lm	ll	ll	ll
Marker29038	nnxnp	np	nn	np	np	nn	nn	np	nn	np	np	nn	np	nn	nn	np	nn	np	nn	nn	nn	np	nn	nn	np	np	np	nn	nn	nn	nn	nn	nn	np	nn	np	nn	nn	np	np	nn	nn	nn	np	nn	np	nn	np	np
Marker293412	nnxnp	nn	np	nn	nn	np	np	nn	np	nn	nn	np	nn	np	np	nn	np	nn	np	np	np	nn	np	np	nn	nn	nn	np	np	np	np	np	np	nn	np	nn	np	np	nn	nn	np	np	np	nn	np	nn	np	nn	nn
Marker257832	nnxnp	nn	np	nn	nn	np	np	nn	np	nn	nn	np	nn	np	nn	nn	np	nn	np	np	np	nn	np	np	nn	nn	nn	np	np	np	np	np	np	nn	np	nn	np	np	nn	nn	np	np	np	nn	np	nn	np	nn	nn
Marker320470	lmxll	ll	lm	lm	ll	ll	lm	ll	lm	ll	lm	lm	ll	lm	ll	ll	ll	ll	lm	lm	lm	ll	lm	lm	lm	lm	ll	lm	lm	lm	lm	lm	lm	ll	lm	ll	lm	ll	lm	lm	lm	lm	lm	lm	lm	ll	lm	lm	lm
Marker236941	nnxnp	nn	np	nn	nn	np	np	nn	np	nn	nn	np	nn	np	nn	nn	np	nn	np	np	np	nn	np	np	nn	nn	nn	np	np	np	np	np	np	nn	np	nn	np	np	nn	nn	np	np	np	nn	np	nn	np	nn	nn
Marker228021	nnxnp	nn	np	nn	nn	np	np	nn	np	nn	nn	np	nn	np	nn	nn	np	nn	np	np	np	nn	np	np	nn	nn	nn	np	np	np	np	np	np	nn	np	nn	np	np	nn	nn	np	np	np	nn	np	nn	np	nn	nn
Marker68954	lmxll	lm	ll	ll	lm	lm	ll	lm	ll	lm	ll	ll	lm	ll	lm	lm	lm	lm	ll	ll	ll	lm	ll	ll	ll	ll	lm	ll	ll	ll	ll	ll	ll	lm	ll	lm	ll	lm	ll	ll	ll	ll	ll	ll	ll	lm	ll	ll	ll
Marker421208	lmxll	ll	lm	lm	ll	ll	lm	ll	lm	ll	lm	lm	ll	lm	ll	ll	ll	ll	lm	lm	lm	ll	lm	lm	lm	lm	ll	ll	lm	lm	lm	lm	lm	ll	lm	ll	lm	ll	lm	lm	lm	lm	lm	lm	lm	ll	ll	lm	lm
Marker209244	lmxll	lm	ll	ll	lm	lm	ll	lm	ll	lm	ll	ll	lm	ll	lm	lm	lm	lm	ll	ll	ll	lm	ll	ll	ll	ll	lm	lm	ll	ll	ll	ll	ll	lm	ll	lm	ll	lm	ll	ll	ll	ll	ll	ll	ll	lm	lm	ll	ll
Marker137213	lmxll	lm	ll	ll	lm	lm	ll	lm	ll	lm	ll	ll	lm	ll	lm	lm	lm	lm	ll	ll	ll	lm	ll	ll	ll	ll	lm	lm	ll	ll	ll	ll	ll	lm	ll	lm	ll	lm	ll	ll	ll	ll	ll	ll	ll	lm	lm	ll	ll
Marker576388	lmxll	lm	ll	ll	lm	lm	ll	lm	ll	lm	ll	ll	lm	ll	lm	lm	lm	lm	ll	ll	ll	lm	ll	ll	ll	ll	lm	lm	ll	ll	ll	ll	ll	lm	ll	lm	ll	lm	ll	ll	lm	ll	ll	ll	ll	lm	lm	ll	ll
Marker204198	lmxll	lm	ll	ll	lm	lm	ll	lm	ll	lm	ll	ll	lm	ll	lm	lm	lm	lm	ll	ll	ll	lm	ll	ll	ll	ll	lm	lm	ll	ll	ll	ll	ll	lm	ll	lm	ll	lm	ll	ll	lm	ll	ll	ll	ll	lm	lm	ll	ll
Marker333111	lmxll	lm	ll	ll	lm	lm	ll	lm	ll	lm	ll	ll	lm	ll	lm	lm	lm	lm	ll	ll	ll	lm	ll	ll	ll	ll	lm	lm	ll	ll	ll	ll	ll	lm	ll	lm	ll	lm	ll	ll	lm	ll	ll	ll	ll	lm	lm	ll	ll
Marker95600	lmxll	lm	ll	ll	lm	lm	ll	lm	ll	lm	ll	ll	lm	ll	lm	lm	lm	lm	ll	ll	ll	lm	ll	ll	ll	ll	lm	lm	ll	ll	ll	ll	ll	lm	ll	lm	ll	lm	ll	ll	lm	ll	ll	ll	ll	lm	lm	ll	ll
Marker408941	lmxll	lm	ll	ll	lm	lm	ll	lm	ll	lm	ll	ll	lm	ll	lm	lm	lm	lm	ll	ll	ll	lm	ll	ll	ll	ll	lm	lm	ll	ll	ll	ll	ll	lm	ll	lm	ll	lm	ll	ll	lm	ll	ll	ll	ll	lm	lm	ll	ll
Marker112171	nnxnp	np	nn	np	np	nn	nn	np	nn	np	np	nn	np	nn	np	np	nn	np	nn	nn	nn	np	nn	nn	np	np	np	nn	nn	nn	nn	nn	nn	nn	nn	np	nn	nn	np	np	nn	nn	nn	nn	nn	np	nn	np	nn
Marker434841	nnxnp	np	nn	np	np	nn	nn	np	nn	np	np	nn	np	nn	np	np	nn	np	nn	nn	nn	np	nn	nn	np	np	np	nn	nn	nn	nn	nn	nn	nn	nn	np	nn	nn	np	np	nn	nn	nn	nn	nn	np	nn	np	nn
Marker119180	lmxll	lm	ll	ll	lm	lm	ll	lm	ll	lm	ll	ll	lm	ll	lm	lm	lm	lm	ll	ll	ll	lm	ll	ll	ll	ll	lm	lm	ll	ll	ll	ll	ll	lm	ll	lm	ll	lm	ll	lm	lm	ll	ll	ll	ll	lm	lm	ll	ll
Marker773855	lmxll	ll	lm	lm	ll	ll	lm	ll	lm	ll	lm	lm	ll	lm	ll	ll	ll	ll	lm	lm	lm	ll	lm	lm	lm	lm	ll	ll	lm	lm	lm	lm	lm	ll	lm	ll	lm	ll	lm	ll	ll	lm	lm	lm	lm	ll	ll	lm	lm
Marker506766	lmxll	ll	lm	ll	ll	ll	lm	ll	lm	ll	lm	lm	ll	lm	ll	ll	ll	ll	lm	lm	lm	ll	lm	lm	lm	lm	ll	ll	lm	lm	lm	lm	lm	lm	lm	ll	lm	ll	lm	ll	ll	lm	lm	lm	lm	ll	ll	lm	lm
Marker301557	lmxll	lm	ll	lm	lm	lm	ll	lm	ll	lm	ll	ll	lm	ll	lm	lm	lm	lm	ll	ll	ll	lm	ll	ll	ll	ll	lm	lm	ll	ll	ll	ll	ll	ll	ll	lm	ll	lm	ll	lm	lm	ll	ll	ll	ll	lm	lm	ll	ll
Marker67682	nnxnp	np	nn	np	np	nn	nn	np	nn	np	np	nn	np	nn	np	np	np	np	nn	nn	nn	np	nn	nn	nn	np	np	nn	nn	nn	nn	nn	nn	nn	nn	np	nn	nn	np	np	nn	nn	nn	nn	nn	np	nn	np	nn
Marker186193	nnxnp	np	nn	np	np	nn	nn	np	nn	np	np	nn	np	nn	np	np	np	np	nn	nn	nn	np	nn	nn	nn	np	np	nn	nn	nn	nn	nn	nn	nn	nn	np	nn	nn	np	np	nn	nn	nn	nn	nn	np	nn	np	nn
Marker333899	nnxnp	np	nn	np	np	nn	nn	np	nn	np	np	nn	np	nn	np	np	np	np	nn	nn	nn	np	nn	nn	nn	np	np	nn	nn	nn	nn	nn	nn	nn	nn	np	nn	nn	np	np	nn	nn	nn	nn	nn	np	nn	np	nn
Marker83845	lmxll	lm	ll	lm	lm	lm	ll	lm	ll	ll	ll	ll	lm	ll	lm	lm	lm	lm	ll	ll	ll	lm	ll	ll	ll	ll	lm	lm	ll	ll	ll	ll	ll	ll	lm	lm	lm	lm	ll	lm	lm	ll	ll	ll	ll	lm	lm	ll	ll
Marker583927	lmxll	ll	lm	ll	ll	ll	lm	ll	lm	lm	lm	lm	ll	lm	ll	ll	ll	ll	lm	lm	lm	ll	lm	lm	lm	lm	ll	ll	lm	lm	lm	lm	lm	lm	ll	ll	ll	ll	lm	ll	ll	lm	lm	lm	lm	ll	ll	lm	lm
Marker190667	nnxnp	nn	np	nn	nn	np	np	nn	np	nn	nn	np	nn	np	nn	nn	nn	nn	np	np	np	nn	np	np	np	nn	nn	np	np	np	np	np	np	np	np	nn	np	np	nn	nn	np	np	np	np	np	nn	np	nn	np
Marker50043	lmxll	lm	ll	lm	lm	lm	ll	lm	ll	ll	ll	ll	lm	ll	lm	lm	lm	lm	ll	ll	ll	lm	ll	ll	ll	ll	lm	lm	ll	ll	ll	ll	ll	ll	lm	lm	lm	lm	ll	lm	lm	ll	ll	ll	ll	lm	lm	ll	ll
Marker212485	nnxnp	nn	np	nn	nn	np	np	nn	np	nn	nn	np	nn	np	nn	nn	nn	nn	np	np	np	nn	np	np	np	nn	nn	np	np	np	np	np	np	np	np	nn	np	np	nn	nn	np	np	np	np	np	nn	np	nn	np
Marker348741	nnxnp	np	nn	np	np	nn	nn	np	nn	np	np	nn	np	nn	np	np	np	np	nn	nn	nn	np	nn	nn	nn	np	np	nn	nn	nn	nn	nn	nn	nn	nn	np	nn	nn	np	np	nn	nn	nn	nn	nn	np	nn	np	nn
Marker112450	hkxhk	hk	hk	hk	hk	hh	hk	hk	hk	kk	kk	hk	hk	hk	hk	hk	hk	hk	hk	hk	hk	hk	hk	hk	hk	kk	hk	hh	hk	hk	hk	hk	hk	hk	hh	hk	hh	hh	kk	hk	hh	hk	hk	hk	hk	hk	hh	kk	hk
Marker379726	nnxnp	np	nn	np	np	nn	nn	np	nn	np	np	nn	np	nn	np	np	np	np	nn	nn	nn	np	nn	nn	nn	np	np	nn	nn	nn	nn	nn	nn	nn	nn	np	nn	nn	np	np	nn	nn	nn	nn	nn	np	nn	np	nn
Marker402464	nnxnp	nn	np	nn	nn	np	np	nn	np	nn	nn	np	nn	np	nn	nn	nn	nn	np	np	np	nn	np	np	np	nn	nn	np	np	np	np	np	np	np	np	nn	np	np	nn	nn	np	np	np	np	np	nn	np	nn	np
Marker235776	nnxnp	nn	np	nn	nn	np	np	nn	np	nn	nn	np	nn	np	nn	nn	nn	nn	np	np	np	nn	np	np	np	nn	nn	np	np	np	np	np	np	np	np	nn	np	np	nn	nn	np	np	np	np	np	nn	np	nn	np
Marker309145	nnxnp	nn	np	nn	nn	np	np	nn	np	nn	nn	np	nn	np	nn	nn	nn	nn	np	np	np	nn	np	np	np	nn	nn	np	np	np	np	np	np	np	np	nn	np	np	nn	nn	np	np	np	np	np	nn	np	nn	np
Marker110655	hkxhk	kk	hh	kk	kk	hk	hh	kk	hh	hk	hk	hh	kk	hh	kk	kk	kk	kk	hh	hh	hh	kk	hh	hh	hh	hk	kk	hk	hh	hh	hh	hh	hh	hh	hk	kk	hk	hk	hk	kk	hk	hh	hh	hh	hh	kk	hk	hk	hh
Marker441591	nnxnp	nn	np	nn	nn	np	np	nn	np	nn	nn	np	nn	np	nn	nn	nn	nn	np	np	np	nn	np	np	np	nn	nn	np	np	np	np	np	np	np	np	nn	np	np	nn	nn	np	np	np	np	np	nn	np	nn	np
Marker260815	nnxnp	np	nn	np	np	nn	nn	np	nn	np	np	nn	np	nn	np	np	np	np	nn	nn	nn	np	nn	nn	nn	np	np	nn	nn	nn	nn	nn	nn	nn	nn	np	nn	nn	np	np	nn	nn	nn	nn	nn	np	nn	np	nn
Marker281708	nnxnp	nn	np	nn	nn	np	np	nn	np	nn	nn	np	nn	np	nn	nn	nn	nn	np	np	np	nn	np	np	np	nn	nn	np	np	np	np	np	np	np	np	nn	np	np	nn	nn	np	np	np	np	np	nn	np	nn	np
Marker190373	nnxnp	nn	np	nn	nn	np	np	nn	np	nn	nn	np	nn	np	nn	nn	nn	nn	np	np	np	nn	np	np	np	nn	nn	np	np	np	np	np	np	np	np	nn	np	np	nn	nn	np	np	np	np	np	nn	np	nn	np
Marker162097	nnxnp	np	nn	np	np	nn	nn	np	nn	np	np	nn	np	nn	np	np	np	np	nn	nn	nn	np	nn	nn	nn	np	np	nn	nn	nn	nn	nn	nn	nn	nn	np	nn	nn	np	np	nn	nn	nn	nn	nn	np	nn	np	nn
Marker245861	nnxnp	nn	np	nn	nn	np	np	nn	np	nn	nn	np	nn	np	nn	nn	nn	nn	np	np	np	nn	np	np	np	nn	nn	np	np	np	np	np	np	np	np	nn	np	np	nn	nn	np	np	np	np	np	nn	np	nn	np
Marker540915	nnxnp	np	nn	np	np	nn	nn	np	nn	np	np	nn	np	nn	np	np	np	np	nn	nn	nn	np	nn	nn	nn	np	np	nn	nn	nn	nn	nn	nn	nn	nn	np	nn	nn	np	np	nn	nn	nn	nn	nn	np	nn	np	nn
Marker406786	nnxnp	np	nn	np	np	nn	nn	np	nn	np	np	nn	np	nn	np	np	np	np	nn	nn	nn	np	nn	nn	nn	np	np	nn	nn	nn	nn	nn	nn	nn	nn	np	nn	nn	np	np	nn	nn	nn	nn	nn	np	nn	np	nn
Marker316997	nnxnp	np	nn	np	np	nn	nn	np	nn	np	np	nn	np	nn	np	np	np	np	nn	nn	nn	np	nn	nn	nn	np	np	nn	nn	nn	nn	nn	nn	nn	nn	np	nn	nn	np	np	nn	nn	nn	nn	nn	np	nn	np	nn
Marker95513	lmxll	lm	ll	lm	lm	ll	ll	lm	ll	lm	ll	ll	lm	ll	lm	lm	lm	lm	ll	ll	lm	lm	ll	ll	ll	ll	lm	ll	ll	ll	ll	lm	ll	ll	ll	lm	lm	lm	lm	lm	lm	ll	ll	ll	lm	lm	lm	lm	lm
Marker254339	lmxll	ll	lm	ll	ll	lm	lm	ll	lm	ll	lm	lm	ll	lm	ll	ll	ll	ll	lm	lm	ll	ll	lm	lm	lm	lm	ll	lm	lm	lm	lm	ll	lm	lm	lm	ll	ll	ll	ll	ll	ll	lm	lm	lm	ll	ll	ll	ll	ll
Marker353198	lmxll	ll	lm	ll	ll	lm	lm	ll	lm	ll	lm	lm	ll	lm	ll	ll	ll	ll	lm	lm	ll	ll	lm	lm	lm	lm	ll	lm	lm	lm	lm	ll	lm	lm	lm	ll	ll	ll	ll	ll	ll	lm	lm	lm	ll	ll	ll	ll	ll
Marker578772	lmxll	ll	lm	ll	ll	lm	lm	ll	lm	ll	lm	lm	ll	lm	ll	ll	ll	ll	lm	lm	ll	ll	lm	lm	lm	lm	ll	lm	lm	lm	lm	ll	lm	lm	lm	ll	ll	ll	ll	ll	ll	lm	lm	lm	ll	ll	ll	ll	ll
Marker345429	lmxll	lm	ll	lm	lm	ll	ll	lm	ll	lm	ll	ll	lm	ll	lm	lm	lm	lm	ll	ll	lm	lm	ll	ll	ll	ll	lm	ll	ll	ll	ll	lm	ll	ll	ll	lm	lm	lm	lm	lm	lm	ll	ll	ll	lm	lm	lm	lm	lm
Marker398682	lmxll	lm	ll	lm	lm	ll	ll	lm	ll	lm	ll	ll	lm	ll	lm	lm	lm	lm	ll	ll	lm	lm	ll	ll	ll	ll	lm	ll	ll	ll	lm	ll	ll	ll	ll	lm	lm	ll	lm	lm	lm	ll	ll	ll	lm	lm	lm	lm	lm
Marker355112	lmxll	lm	ll	lm	lm	ll	ll	lm	ll	lm	ll	ll	lm	ll	lm	lm	lm	lm	ll	ll	lm	lm	ll	ll	ll	ll	lm	ll	ll	ll	lm	ll	ll	ll	ll	lm	lm	ll	lm	lm	lm	ll	ll	ll	lm	lm	lm	lm	lm
Marker86390	lmxll	lm	ll	lm	lm	ll	ll	lm	ll	lm	ll	ll	lm	ll	lm	lm	lm	lm	ll	ll	lm	lm	ll	ll	ll	ll	lm	ll	ll	ll	lm	ll	ll	ll	ll	lm	lm	ll	lm	lm	lm	ll	ll	ll	lm	lm	lm	lm	lm
Marker154801	lmxll	ll	lm	ll	ll	lm	lm	ll	lm	ll	lm	lm	ll	lm	ll	ll	ll	ll	lm	lm	ll	ll	lm	lm	lm	lm	ll	lm	lm	lm	ll	lm	lm	lm	lm	ll	ll	lm	ll	ll	ll	lm	lm	lm	ll	ll	ll	ll	ll
Marker515912	lmxll	lm	ll	lm	lm	ll	ll	lm	ll	lm	ll	ll	lm	ll	lm	lm	lm	lm	ll	ll	lm	lm	ll	ll	ll	ll	lm	ll	ll	ll	lm	ll	ll	ll	ll	lm	lm	ll	lm	lm	lm	ll	ll	ll	lm	lm	lm	lm	lm
Marker445655	nnxnp	np	nn	np	np	nn	nn	np	nn	np	np	nn	np	nn	np	np	np	np	nn	nn	nn	np	nn	nn	nn	np	np	nn	nn	nn	nn	nn	nn	nn	nn	np	nn	nn	np	np	nn	nn	nn	nn	nn	np	nn	np	nn
Marker38722	hkxhk	kk	hh	kk	kk	hh	hh	kk	hh	kk	hk	hh	kk	hh	kk	kk	kk	kk	hh	hh	hk	kk	hh	hh	hh	hk	kk	hh	hh	hh	hk	hh	hh	hh	hh	kk	hk	hh	kk	kk	hk	hh	hh	hk	hk	kk	hk	kk	hk
Marker119176	efxeg	ef	eg	ef	ef	eg	eg	ef	eg	ef	ee	eg	ef	eg	ef	ef	ef	ef	eg	eg	fg	ef	eg	eg	eg	ee	ef	eg	eg	eg	fg	eg	eg	eg	eg	ef	fg	eg	ef	ef	fg	eg	eg	fg	fg	ef	fg	ef	fg
Marker183219	nnxnp	nn	np	nn	nn	np	np	nn	np	nn	nn	np	nn	np	nn	nn	nn	nn	np	np	np	nn	np	np	np	nn	nn	np	np	np	np	np	np	np	np	nn	np	np	nn	nn	np	np	np	np	np	nn	np	nn	np
Marker357691	nnxnp	np	nn	np	np	nn	nn	np	nn	np	np	nn	np	nn	np	np	np	np	nn	nn	nn	np	nn	nn	nn	np	np	nn	nn	nn	nn	nn	nn	nn	nn	np	nn	nn	np	np	nn	nn	nn	nn	nn	np	nn	np	nn
Marker252068	nnxnp	np	nn	np	np	nn	nn	np	nn	np	np	nn	np	nn	np	np	np	np	nn	nn	nn	np	nn	nn	nn	np	np	nn	nn	nn	nn	nn	nn	nn	nn	np	nn	nn	np	np	nn	nn	nn	nn	nn	np	nn	np	nn
Marker155311	efxeg	ee	fg	ee	ee	fg	fg	ee	fg	ee	ef	fg	ee	fg	ee	ee	ee	ee	fg	fg	eg	ee	fg	fg	fg	ef	ee	fg	fg	fg	eg	fg	fg	fg	fg	ee	eg	fg	ee	ee	eg	fg	fg	eg	eg	ee	eg	ee	eg
Marker149753	lmxll	lm	ll	lm	lm	ll	ll	lm	ll	lm	ll	ll	lm	ll	lm	lm	lm	lm	ll	ll	lm	lm	ll	ll	ll	ll	lm	ll	ll	ll	lm	ll	ll	ll	ll	lm	lm	ll	lm	lm	lm	ll	ll	lm	lm	lm	lm	lm	lm
Marker354318	nnxnp	nn	np	nn	nn	np	np	nn	np	nn	nn	np	nn	np	nn	nn	nn	nn	np	np	np	nn	np	np	np	nn	nn	np	np	np	np	np	np	np	np	nn	np	np	nn	nn	np	np	np	np	np	nn	np	nn	np
Marker137945	lmxll	ll	lm	ll	ll	lm	lm	ll	lm	ll	lm	lm	ll	lm	ll	ll	ll	ll	lm	lm	ll	ll	lm	lm	lm	lm	ll	lm	lm	lm	ll	lm	lm	lm	lm	ll	ll	lm	ll	ll	ll	lm	lm	ll	ll	ll	ll	ll	ll
Marker372786	lmxll	ll	lm	ll	ll	lm	lm	ll	lm	ll	lm	lm	ll	lm	ll	ll	ll	ll	lm	lm	ll	ll	lm	lm	lm	lm	ll	lm	lm	lm	ll	lm	lm	lm	lm	ll	ll	lm	ll	ll	ll	lm	lm	ll	ll	ll	ll	ll	ll
Marker92881	hkxhk	hh	kk	hh	hh	kk	kk	hh	kk	hh	hk	kk	hh	kk	hh	hh	hh	hh	kk	kk	hk	hh	kk	kk	hk	hh	hh	kk	kk	kk	hk	kk	kk	kk	kk	hh	hk	kk	hh	hh	hk	kk	kk	hk	hk	hh	hk	hh	hk
Marker365463	nnxnp	nn	np	nn	nn	np	np	nn	np	nn	nn	np	nn	np	nn	nn	nn	nn	np	np	np	nn	np	np	np	nn	nn	np	np	np	np	np	np	np	np	nn	np	np	nn	nn	np	np	np	np	np	nn	np	nn	np
Marker193378	nnxnp	nn	np	nn	nn	np	np	nn	np	nn	nn	np	nn	np	nn	nn	nn	nn	np	np	np	nn	np	np	np	nn	nn	np	np	np	np	np	np	np	np	nn	np	np	nn	nn	np	np	np	np	np	nn	np	nn	np
Marker369455	lmxll	ll	lm	ll	ll	lm	lm	ll	lm	ll	lm	lm	ll	lm	ll	ll	ll	ll	lm	lm	ll	ll	lm	lm	ll	ll	ll	lm	lm	lm	ll	lm	lm	lm	lm	ll	ll	lm	ll	ll	ll	lm	lm	ll	ll	ll	ll	ll	ll
Marker266274	lmxll	lm	ll	lm	lm	ll	ll	lm	ll	lm	ll	ll	lm	ll	lm	lm	lm	lm	ll	ll	lm	lm	ll	ll	lm	lm	lm	ll	ll	ll	lm	ll	ll	ll	ll	lm	lm	ll	lm	lm	lm	ll	ll	lm	lm	lm	lm	lm	lm
Marker425000	lmxll	ll	lm	ll	ll	lm	lm	ll	lm	ll	lm	lm	ll	lm	ll	ll	ll	ll	lm	lm	ll	ll	lm	lm	ll	ll	ll	lm	lm	lm	ll	lm	lm	lm	lm	ll	ll	ll	ll	ll	ll	lm	lm	ll	ll	ll	ll	ll	ll
Marker126954	lmxll	lm	ll	lm	lm	ll	ll	lm	ll	lm	ll	ll	lm	ll	lm	lm	lm	lm	ll	ll	lm	lm	ll	ll	lm	lm	lm	ll	ll	ll	lm	ll	ll	ll	ll	lm	lm	lm	lm	lm	lm	ll	ll	lm	lm	lm	lm	lm	lm
Marker262670	lmxll	ll	lm	ll	ll	lm	lm	ll	lm	ll	lm	lm	ll	lm	ll	ll	ll	ll	lm	lm	ll	ll	lm	lm	ll	ll	ll	lm	lm	lm	ll	lm	lm	lm	lm	ll	ll	ll	ll	ll	ll	lm	lm	ll	ll	ll	ll	ll	ll
Marker412848	lmxll	ll	lm	ll	ll	lm	lm	ll	lm	ll	lm	lm	ll	lm	ll	ll	ll	ll	lm	lm	ll	ll	lm	lm	ll	ll	ll	lm	lm	lm	ll	lm	lm	lm	lm	ll	ll	ll	ll	ll	ll	lm	lm	ll	ll	ll	ll	ll	ll
Marker219682	lmxll	ll	lm	ll	ll	lm	lm	ll	lm	ll	lm	lm	ll	lm	ll	ll	ll	ll	lm	lm	ll	ll	lm	lm	ll	ll	ll	lm	lm	lm	ll	lm	lm	lm	lm	ll	ll	ll	ll	ll	ll	lm	lm	ll	ll	ll	lm	ll	ll
Marker283785	lmxll	ll	lm	ll	ll	lm	lm	ll	lm	ll	lm	lm	ll	lm	ll	ll	ll	ll	lm	lm	ll	ll	lm	lm	ll	ll	ll	lm	lm	lm	ll	lm	lm	lm	lm	ll	ll	ll	ll	ll	ll	lm	lm	ll	ll	ll	lm	ll	ll
Marker619670	lmxll	lm	ll	lm	lm	ll	ll	lm	ll	lm	ll	ll	lm	ll	lm	lm	lm	lm	ll	ll	lm	lm	ll	ll	lm	lm	lm	ll	ll	ll	lm	ll	ll	ll	ll	lm	lm	lm	lm	lm	lm	ll	ll	lm	lm	lm	ll	lm	lm
Marker269384	lmxll	ll	lm	ll	ll	lm	lm	ll	lm	ll	lm	lm	ll	lm	ll	ll	ll	ll	lm	lm	ll	ll	lm	lm	ll	ll	ll	lm	lm	lm	ll	lm	lm	lm	lm	ll	ll	ll	ll	ll	ll	lm	lm	ll	ll	ll	lm	ll	ll
Marker291985	lmxll	lm	ll	lm	lm	ll	ll	lm	ll	lm	ll	ll	lm	ll	lm	lm	lm	lm	ll	ll	lm	lm	ll	ll	lm	lm	lm	ll	ll	ll	lm	ll	ll	ll	ll	lm	lm	lm	lm	lm	lm	ll	ll	lm	lm	lm	ll	lm	lm
Marker769957	lmxll	lm	ll	lm	lm	ll	ll	lm	ll	lm	ll	ll	lm	ll	lm	lm	lm	lm	ll	ll	lm	lm	ll	ll	lm	lm	lm	ll	ll	ll	lm	ll	ll	ll	lm	lm	lm	lm	lm	lm	lm	ll	ll	lm	lm	lm	ll	lm	lm
Marker41682	lmxll	ll	lm	ll	ll	lm	lm	ll	lm	ll	lm	lm	ll	lm	ll	ll	ll	ll	lm	lm	ll	ll	lm	lm	ll	ll	ll	lm	lm	lm	ll	lm	lm	lm	ll	ll	ll	ll	ll	ll	ll	lm	lm	ll	ll	ll	lm	ll	ll
Marker107937	lmxll	lm	ll	lm	lm	ll	ll	lm	ll	lm	ll	ll	lm	ll	lm	lm	lm	lm	ll	ll	lm	lm	ll	ll	lm	lm	lm	ll	ll	ll	lm	ll	ll	ll	lm	lm	lm	lm	lm	lm	lm	ll	ll	lm	lm	lm	ll	lm	lm
Marker303692	lmxll	ll	lm	ll	ll	lm	lm	ll	lm	ll	lm	lm	ll	lm	ll	ll	ll	ll	lm	lm	ll	ll	lm	lm	ll	ll	ll	lm	lm	lm	ll	lm	lm	lm	ll	ll	ll	ll	ll	ll	ll	lm	lm	ll	ll	ll	lm	ll	ll
Marker383097	lmxll	lm	ll	lm	lm	ll	ll	lm	ll	lm	ll	ll	lm	ll	lm	lm	lm	lm	ll	ll	lm	lm	lm	ll	lm	lm	lm	ll	ll	ll	lm	ll	ll	ll	lm	lm	lm	lm	lm	lm	lm	ll	ll	lm	lm	lm	ll	lm	lm
Marker233375	lmxll	ll	lm	ll	ll	lm	lm	ll	lm	ll	ll	lm	ll	lm	ll	ll	ll	ll	lm	lm	ll	ll	ll	lm	ll	ll	ll	lm	lm	lm	ll	lm	lm	lm	ll	ll	ll	ll	ll	ll	ll	lm	lm	ll	ll	ll	lm	ll	ll
Marker301358	lmxll	lm	ll	lm	lm	ll	ll	lm	ll	lm	lm	ll	lm	ll	lm	lm	lm	lm	ll	ll	lm	lm	lm	ll	lm	lm	lm	ll	ll	ll	lm	ll	ll	ll	lm	lm	lm	lm	lm	lm	lm	ll	ll	lm	lm	lm	ll	lm	lm
Marker490811	lmxll	lm	ll	lm	lm	ll	ll	lm	ll	lm	lm	ll	lm	ll	lm	lm	lm	lm	ll	ll	lm	lm	lm	ll	lm	lm	lm	ll	ll	ll	lm	ll	ll	ll	lm	lm	lm	lm	lm	lm	lm	ll	ll	lm	lm	lm	ll	lm	lm
Marker532507	hkxhk	hh	kk	hh	hh	kk	kk	hh	kk	hh	hh	kk	hh	kk	hh	hh	hk	hh	kk	kk	hk	hh	hk	kk	hk	hh	hh	kk	kk	kk	hk	kk	kk	kk	hk	hh	hk	hk	hh	hh	hk	kk	kk	hk	hk	hh	kk	hh	hk
Marker231827	nnxnp	np	nn	np	np	nn	nn	np	nn	np	np	nn	np	nn	np	np	nn	np	nn	nn	nn	np	nn	nn	np	np	np	nn	nn	nn	nn	nn	nn	nn	nn	np	nn	nn	np	np	nn	nn	nn	nn	nn	np	nn	np	nn
Marker236234	nnxnp	nn	np	nn	nn	np	np	nn	np	nn	nn	np	nn	np	nn	nn	np	nn	np	np	np	nn	np	np	nn	nn	nn	np	np	np	np	np	np	np	np	nn	np	np	nn	nn	np	np	np	np	np	nn	np	nn	np
Marker377242	lmxll	lm	ll	lm	lm	ll	ll	lm	ll	lm	lm	ll	lm	ll	lm	lm	lm	lm	ll	ll	lm	lm	ll	ll	lm	lm	lm	ll	ll	ll	lm	ll	ll	ll	lm	lm	lm	lm	lm	lm	lm	ll	ll	lm	ll	lm	ll	lm	lm
Marker319558	lmxll	ll	lm	ll	ll	lm	lm	ll	lm	ll	ll	lm	ll	lm	ll	ll	ll	ll	lm	lm	ll	ll	lm	lm	ll	ll	ll	lm	lm	lm	ll	lm	lm	lm	ll	ll	ll	ll	ll	ll	ll	lm	lm	ll	lm	ll	lm	ll	ll
Marker581567	lmxll	ll	lm	ll	ll	lm	lm	ll	lm	ll	ll	lm	ll	lm	ll	ll	ll	ll	lm	lm	ll	ll	lm	lm	ll	ll	ll	lm	lm	lm	ll	lm	lm	lm	ll	ll	ll	ll	ll	ll	ll	lm	lm	ll	lm	ll	lm	ll	ll
Marker334444	lmxll	ll	lm	ll	ll	lm	lm	ll	lm	ll	ll	lm	ll	lm	ll	ll	ll	ll	lm	lm	ll	ll	lm	lm	ll	ll	ll	lm	lm	lm	ll	lm	lm	lm	ll	ll	ll	ll	ll	ll	ll	lm	lm	ll	lm	ll	lm	ll	ll
Marker311721	hkxhk	kk	hh	kk	kk	hh	hh	kk	hh	kk	kk	hh	kk	hh	kk	kk	hk	kk	hh	hh	hk	kk	hh	hh	kk	kk	kk	hh	hh	hh	hk	hh	hh	hh	hk	kk	hk	hk	kk	kk	hk	hh	hh	hk	hh	kk	hh	kk	hk
Marker172320	nnxnp	nn	np	nn	nn	np	np	nn	np	nn	nn	np	nn	np	nn	nn	np	nn	np	np	np	nn	np	np	nn	nn	nn	np	np	np	np	np	np	np	np	nn	np	np	nn	nn	np	np	np	np	np	nn	np	nn	np
Marker253496	lmxll	lm	ll	lm	lm	ll	ll	lm	ll	lm	lm	ll	lm	ll	lm	lm	lm	lm	ll	ll	lm	lm	ll	ll	lm	lm	lm	ll	ll	ll	lm	ll	ll	ll	lm	lm	lm	lm	lm	lm	lm	ll	ll	lm	ll	lm	ll	lm	lm
Marker308194	lmxll	lm	ll	lm	lm	ll	ll	lm	ll	lm	lm	ll	lm	ll	lm	lm	lm	lm	ll	ll	lm	lm	ll	ll	lm	lm	lm	ll	ll	ll	lm	ll	ll	ll	lm	lm	lm	lm	lm	lm	lm	ll	ll	lm	ll	lm	ll	lm	lm
Marker237364	nnxnp	np	nn	np	np	nn	nn	np	nn	np	np	nn	np	nn	np	np	nn	np	nn	nn	nn	np	nn	nn	np	np	np	nn	nn	nn	nn	nn	np	nn	nn	np	nn	nn	np	np	nn	nn	nn	nn	nn	np	nn	np	np
Marker334053	nnxnp	np	nn	np	np	nn	nn	np	nn	np	np	nn	np	nn	np	np	nn	np	nn	nn	nn	np	nn	nn	np	np	np	nn	nn	nn	nn	nn	np	nn	nn	np	nn	nn	np	np	nn	nn	nn	nn	nn	np	nn	np	np
Marker17195	nnxnp	np	nn	np	np	nn	nn	np	nn	np	np	nn	np	nn	np	np	nn	np	nn	nn	nn	np	nn	nn	np	np	np	nn	nn	nn	nn	nn	np	nn	nn	np	nn	nn	np	np	nn	nn	nn	nn	nn	np	nn	nn	np
Marker213960	lmxll	lm	ll	lm	lm	lm	ll	lm	ll	lm	lm	ll	lm	ll	lm	lm	lm	lm	ll	lm	lm	lm	lm	ll	lm	lm	lm	ll	ll	ll	ll	ll	ll	ll	lm	lm	lm	lm	lm	lm	lm	ll	ll	lm	ll	lm	ll	lm	lm
Marker458855	lmxll	lm	ll	lm	lm	lm	ll	lm	ll	lm	lm	ll	lm	ll	lm	lm	lm	lm	ll	lm	lm	lm	lm	ll	lm	lm	lm	ll	ll	ll	ll	ll	ll	ll	lm	lm	lm	lm	lm	lm	lm	ll	ll	lm	ll	lm	ll	lm	lm
Marker33787	nnxnp	np	nn	np	np	nn	nn	np	nn	np	np	nn	np	nn	np	np	nn	np	nn	nn	nn	np	nn	nn	np	np	np	nn	nn	nn	nn	nn	np	nn	nn	np	nn	nn	np	np	nn	nn	nn	nn	nn	np	nn	nn	np
Marker41249	lmxll	lm	ll	lm	lm	lm	ll	lm	ll	lm	lm	ll	lm	ll	lm	lm	lm	lm	ll	lm	lm	lm	lm	ll	lm	lm	lm	ll	ll	ll	ll	ll	ll	ll	lm	lm	lm	lm	lm	lm	lm	ll	ll	lm	ll	lm	ll	lm	lm
Marker315176	nnxnp	nn	np	nn	nn	np	np	nn	np	nn	nn	np	nn	np	nn	nn	np	nn	np	np	np	nn	np	np	nn	nn	nn	np	np	np	np	np	nn	np	np	nn	np	np	nn	nn	np	np	np	np	np	nn	np	np	nn
Marker89580	nnxnp	nn	np	nn	nn	np	np	nn	np	nn	nn	np	nn	np	nn	nn	np	nn	np	np	np	nn	np	np	nn	nn	nn	np	np	np	np	np	nn	np	np	nn	np	np	nn	nn	np	np	np	np	np	nn	np	np	nn
Marker126270	efxeg	fg	ee	fg	fg	ef	ee	fg	ee	fg	fg	ee	fg	ee	fg	fg	ef	fg	ee	ef	ef	fg	ef	ee	fg	fg	fg	ee	ee	ee	ee	ee	eg	ee	ef	fg	ef	ef	fg	fg	ef	ee	ee	ef	ee	fg	ee	ef	fg
Marker214270	nnxnp	nn	np	nn	nn	np	np	nn	np	nn	nn	np	nn	np	nn	nn	np	nn	np	np	np	nn	np	np	nn	nn	nn	np	np	np	np	np	nn	np	np	nn	np	np	nn	nn	np	np	np	np	np	nn	np	np	nn
Marker92169	lmxll	lm	ll	lm	lm	lm	ll	lm	ll	lm	lm	ll	lm	ll	lm	lm	lm	lm	ll	lm	lm	lm	lm	ll	lm	lm	lm	ll	ll	ll	ll	ll	ll	ll	lm	lm	lm	lm	lm	lm	lm	ll	ll	lm	ll	lm	ll	lm	lm
Marker486652	lmxll	lm	ll	lm	lm	lm	ll	lm	ll	lm	lm	ll	lm	ll	lm	lm	lm	lm	ll	lm	lm	lm	lm	ll	lm	lm	lm	ll	ll	ll	ll	ll	ll	ll	lm	lm	lm	lm	lm	lm	lm	ll	ll	lm	ll	lm	ll	lm	lm
Marker279655	nnxnp	nn	np	nn	nn	np	np	nn	np	nn	nn	np	nn	np	nn	nn	np	nn	np	np	np	nn	np	np	nn	nn	nn	np	np	np	np	np	nn	np	np	nn	np	np	nn	nn	np	np	np	np	np	nn	np	np	nn
Marker262890	lmxll	lm	ll	lm	lm	lm	ll	lm	ll	lm	lm	ll	lm	ll	lm	lm	lm	lm	ll	lm	lm	lm	lm	ll	lm	lm	lm	ll	ll	ll	ll	ll	ll	ll	lm	lm	lm	lm	lm	lm	lm	ll	ll	lm	ll	lm	ll	lm	lm
Marker292546	nnxnp	nn	np	nn	nn	np	np	nn	np	nn	nn	np	nn	np	nn	nn	np	nn	np	np	np	nn	np	np	nn	nn	nn	np	np	np	np	np	nn	np	np	nn	np	np	nn	nn	np	np	np	np	np	nn	np	np	nn
Marker111823	efxeg	ef	eg	ef	ef	fg	eg	ef	eg	ef	ef	eg	ef	eg	ef	ef	fg	ef	eg	fg	fg	ef	fg	eg	ef	ef	ef	eg	eg	eg	eg	eg	ee	eg	fg	ef	fg	fg	ef	ef	fg	eg	eg	fg	eg	ef	eg	fg	ef
Marker563820	nnxnp	np	nn	np	np	nn	nn	np	nn	np	np	nn	np	nn	np	np	nn	np	nn	nn	nn	np	nn	nn	np	np	np	nn	nn	nn	nn	nn	np	nn	nn	np	nn	nn	np	np	nn	nn	nn	nn	nn	np	nn	nn	np
Marker390030	nnxnp	np	nn	np	np	nn	nn	np	nn	np	np	nn	np	nn	np	np	nn	np	nn	nn	nn	np	nn	nn	np	np	np	nn	nn	nn	nn	nn	np	np	nn	np	nn	nn	np	np	nn	nn	nn	nn	nn	np	nn	nn	np
Marker150860	nnxnp	np	nn	np	np	nn	nn	np	nn	np	np	nn	np	nn	np	np	nn	np	nn	nn	nn	np	nn	nn	np	np	np	nn	nn	nn	nn	nn	np	np	nn	np	nn	nn	np	np	nn	nn	nn	nn	nn	np	nn	nn	np
Marker242231	nnxnp	np	nn	np	np	nn	nn	np	nn	np	np	nn	np	nn	np	np	nn	np	nn	nn	nn	np	nn	nn	np	np	np	nn	nn	nn	nn	nn	np	np	nn	np	nn	nn	np	np	nn	nn	nn	nn	nn	np	nn	nn	np
Marker552180	nnxnp	np	nn	np	np	nn	nn	np	nn	np	np	nn	np	nn	np	np	nn	np	nn	nn	nn	np	nn	nn	np	np	np	nn	nn	nn	nn	nn	np	np	nn	np	nn	nn	np	np	nn	nn	nn	nn	nn	np	nn	nn	np
Marker441624	nnxnp	nn	np	nn	nn	np	np	nn	np	nn	nn	np	nn	np	nn	nn	np	nn	np	np	np	nn	np	np	nn	nn	nn	np	np	np	np	np	nn	nn	np	nn	np	np	nn	nn	np	np	np	np	np	nn	np	np	nn
Marker168276	nnxnp	np	nn	np	np	nn	nn	np	nn	np	np	nn	np	nn	np	np	nn	np	nn	nn	nn	np	nn	nn	np	np	np	nn	nn	nn	nn	nn	np	np	nn	np	nn	nn	np	np	nn	nn	nn	nn	nn	np	nn	nn	np
Marker92036	nnxnp	nn	np	nn	nn	np	np	nn	np	nn	nn	np	nn	np	nn	nn	np	nn	np	np	np	nn	np	np	nn	nn	nn	np	np	np	np	np	nn	nn	np	nn	np	np	nn	nn	np	np	np	np	np	nn	np	np	nn
Marker253418	lmxll	ll	lm	ll	ll	ll	lm	ll	lm	ll	ll	lm	ll	lm	ll	ll	ll	ll	lm	lm	ll	ll	lm	lm	ll	ll	ll	lm	lm	lm	lm	lm	lm	lm	ll	ll	lm	ll	ll	ll	ll	lm	lm	ll	lm	ll	lm	lm	ll
Marker150382	lmxll	lm	ll	lm	lm	lm	ll	lm	ll	lm	lm	ll	lm	ll	lm	lm	lm	lm	ll	ll	lm	lm	ll	ll	lm	lm	lm	ll	ll	ll	ll	ll	ll	ll	lm	lm	ll	lm	lm	lm	lm	ll	ll	lm	ll	lm	ll	ll	lm
Marker520548	lmxll	ll	lm	ll	ll	ll	lm	ll	lm	ll	ll	lm	ll	lm	ll	ll	ll	ll	lm	ll	ll	ll	lm	lm	ll	ll	ll	lm	lm	lm	lm	lm	lm	lm	ll	ll	lm	ll	ll	ll	ll	lm	lm	ll	lm	ll	ll	lm	ll
Marker587210	lmxll	ll	lm	ll	ll	ll	lm	ll	lm	ll	ll	lm	ll	lm	ll	ll	ll	ll	lm	ll	ll	ll	lm	lm	ll	ll	ll	lm	lm	lm	lm	lm	lm	lm	ll	ll	lm	ll	ll	ll	ll	lm	lm	ll	lm	ll	ll	lm	ll
Marker203505	lmxll	ll	lm	ll	ll	ll	lm	ll	lm	ll	ll	lm	ll	lm	ll	ll	ll	ll	lm	ll	ll	ll	lm	lm	ll	ll	ll	lm	lm	lm	lm	lm	lm	lm	ll	ll	lm	ll	ll	ll	ll	lm	lm	ll	lm	ll	ll	lm	ll
Marker186935	lmxll	ll	lm	ll	ll	ll	lm	ll	lm	ll	ll	lm	ll	lm	ll	ll	ll	ll	lm	ll	ll	ll	lm	lm	ll	ll	ll	lm	lm	lm	lm	lm	lm	lm	ll	ll	lm	ll	ll	ll	ll	lm	lm	ll	lm	ll	ll	lm	ll
Marker90084	lmxll	ll	lm	ll	ll	ll	lm	ll	lm	ll	ll	lm	ll	lm	ll	ll	ll	ll	lm	ll	ll	ll	lm	lm	ll	ll	ll	lm	lm	lm	lm	lm	lm	lm	ll	ll	lm	ll	ll	ll	ll	lm	lm	ll	lm	ll	ll	lm	ll
Marker322699	lmxll	ll	lm	ll	ll	ll	lm	ll	lm	ll	ll	lm	ll	lm	ll	ll	ll	ll	lm	ll	ll	ll	lm	lm	ll	ll	ll	lm	lm	lm	lm	lm	lm	lm	ll	ll	lm	ll	ll	ll	ll	lm	lm	ll	lm	ll	ll	lm	ll
Marker196979	lmxll	ll	lm	ll	ll	ll	lm	ll	lm	ll	ll	lm	ll	lm	ll	ll	ll	ll	lm	ll	ll	ll	lm	lm	ll	ll	ll	lm	lm	lm	lm	lm	lm	lm	ll	ll	lm	ll	ll	ll	ll	lm	lm	ll	lm	ll	ll	lm	ll
Marker48346	lmxll	ll	lm	ll	ll	ll	lm	ll	lm	ll	ll	lm	ll	lm	ll	ll	ll	ll	lm	ll	ll	ll	lm	lm	ll	ll	ll	lm	lm	lm	lm	lm	lm	lm	ll	ll	lm	ll	ll	ll	ll	lm	lm	ll	lm	ll	ll	lm	ll
Marker452545	lmxll	lm	ll	lm	lm	lm	ll	lm	ll	lm	lm	ll	lm	ll	ll	lm	lm	lm	ll	lm	lm	lm	ll	ll	lm	lm	lm	ll	ll	ll	ll	ll	ll	ll	lm	lm	ll	lm	lm	lm	lm	ll	ll	lm	ll	lm	lm	ll	lm
Marker421149	lmxll	ll	lm	ll	ll	ll	lm	ll	lm	ll	ll	lm	ll	lm	lm	ll	ll	ll	lm	ll	ll	ll	lm	lm	ll	ll	ll	lm	lm	lm	lm	lm	lm	lm	ll	ll	lm	ll	ll	ll	ll	lm	lm	ll	lm	ll	ll	lm	ll
Marker466118	lmxll	lm	ll	lm	lm	lm	ll	lm	ll	lm	lm	ll	lm	ll	ll	lm	lm	lm	ll	lm	lm	lm	ll	ll	lm	lm	lm	ll	ll	ll	ll	ll	ll	ll	lm	lm	ll	lm	lm	lm	lm	ll	ll	lm	ll	lm	lm	lm	lm
Marker51924	lmxll	lm	ll	lm	lm	lm	ll	lm	ll	lm	lm	ll	lm	ll	ll	lm	lm	lm	ll	lm	lm	lm	lm	ll	lm	lm	lm	ll	ll	ll	ll	ll	ll	ll	lm	lm	ll	lm	lm	lm	lm	ll	ll	lm	ll	lm	lm	lm	lm
Marker269337	nnxnp	np	nn	np	np	nn	nn	np	nn	np	np	nn	np	np	np	np	nn	np	nn	nn	nn	np	nn	nn	nn	np	np	nn	nn	nn	nn	nn	np	np	nn	np	nn	np	np	np	nn	nn	nn	np	nn	np	nn	nn	nn
Marker204730	lmxll	lm	ll	lm	lm	lm	ll	lm	ll	lm	lm	ll	lm	ll	ll	lm	lm	lm	ll	lm	lm	lm	lm	ll	lm	lm	lm	ll	ll	ll	ll	ll	ll	ll	lm	lm	ll	lm	lm	lm	lm	ll	lm	lm	ll	lm	lm	lm	lm
Marker243833	lmxll	lm	ll	lm	lm	lm	ll	lm	ll	lm	lm	ll	lm	ll	ll	lm	lm	lm	ll	lm	lm	lm	lm	ll	lm	lm	lm	ll	ll	ll	ll	ll	ll	ll	lm	lm	ll	lm	lm	lm	lm	ll	lm	lm	ll	lm	lm	lm	lm
Marker492686	nnxnp	np	nn	np	np	nn	nn	np	nn	np	np	nn	np	np	np	np	nn	np	nn	nn	nn	np	nn	nn	nn	np	np	nn	nn	nn	nn	nn	np	np	nn	np	nn	np	np	np	nn	nn	nn	np	nn	np	nn	nn	nn
Marker140144	efxeg	fg	ee	fg	fg	ef	ee	fg	ee	fg	fg	ee	fg	eg	eg	fg	ef	fg	ee	ef	ef	fg	ef	ee	ef	fg	fg	ee	ee	ee	ee	ee	eg	eg	ef	fg	ee	fg	fg	fg	ef	ee	ef	fg	ee	fg	ef	ef	ef
Marker487506	lmxll	lm	ll	lm	lm	lm	ll	lm	ll	lm	lm	ll	lm	ll	ll	lm	ll	lm	ll	lm	lm	lm	lm	ll	lm	lm	lm	ll	ll	ll	ll	ll	ll	ll	lm	lm	ll	lm	lm	lm	lm	ll	lm	lm	ll	lm	lm	lm	lm
Marker377750	nnxnp	np	nn	np	np	nn	nn	np	nn	np	np	nn	np	np	np	np	nn	np	nn	nn	nn	np	nn	nn	nn	np	np	nn	nn	nn	nn	nn	np	np	nn	np	nn	np	np	np	nn	nn	nn	np	nn	np	nn	nn	nn
Marker681966	nnxnp	np	nn	np	np	nn	nn	np	nn	np	np	nn	np	np	np	np	nn	np	nn	nn	nn	np	nn	nn	nn	np	np	nn	nn	nn	nn	nn	np	np	nn	np	nn	np	np	np	nn	nn	nn	np	nn	np	nn	nn	nn
Marker131667	nnxnp	np	nn	np	np	nn	nn	np	nn	np	np	nn	np	np	np	np	nn	np	nn	nn	nn	np	nn	nn	nn	np	np	nn	nn	nn	nn	nn	np	np	nn	np	nn	np	np	np	nn	nn	nn	np	nn	np	nn	nn	nn
Marker142669	nnxnp	nn	np	nn	nn	np	np	nn	np	nn	nn	np	nn	nn	nn	nn	np	nn	np	np	np	nn	np	np	np	nn	nn	np	np	np	np	np	nn	nn	np	nn	np	nn	nn	nn	np	np	np	nn	np	nn	np	np	np
Marker111484	efxeg	eg	ee	fg	fg	ee	ee	fg	ee	fg	fg	ee	fg	eg	eg	fg	ee	fg	ee	ef	ef	fg	ef	ee	ef	fg	fg	ee	ee	ee	ee	ee	eg	fg	ef	fg	ee	fg	fg	fg	ef	ee	ee	fg	ee	fg	ef	ef	ef
Marker436555	lmxll	ll	ll	lm	lm	ll	ll	lm	ll	lm	lm	ll	lm	ll	ll	lm	ll	lm	ll	lm	lm	lm	lm	ll	lm	lm	lm	ll	ll	ll	ll	ll	ll	lm	lm	lm	ll	lm	lm	lm	lm	ll	ll	lm	ll	lm	lm	lm	lm
Marker632365	nnxnp	np	nn	np	np	nn	nn	np	nn	np	np	nn	np	np	np	np	nn	np	nn	nn	nn	np	nn	nn	nn	np	np	nn	nn	nn	nn	nn	np	np	nn	np	nn	np	np	np	nn	nn	nn	np	nn	np	nn	nn	nn
Marker191462	lmxll	ll	ll	lm	lm	ll	ll	lm	ll	lm	lm	ll	lm	ll	ll	lm	ll	lm	ll	lm	lm	lm	lm	ll	lm	lm	lm	ll	ll	ll	ll	ll	ll	lm	lm	lm	ll	lm	lm	lm	lm	ll	ll	lm	ll	lm	lm	lm	lm
Marker118011	lmxll	lm	lm	ll	ll	lm	lm	ll	lm	ll	ll	lm	ll	lm	lm	ll	lm	ll	lm	lm	ll	ll	ll	lm	lm	ll	ll	lm	lm	lm	lm	lm	lm	ll	ll	ll	lm	ll	ll	ll	ll	lm	lm	ll	lm	ll	ll	ll	ll
Marker142880	lmxll	ll	ll	lm	lm	ll	ll	lm	ll	lm	lm	ll	lm	ll	ll	lm	ll	lm	ll	ll	lm	lm	lm	ll	ll	lm	lm	ll	ll	ll	ll	ll	ll	lm	lm	lm	ll	lm	lm	lm	lm	ll	ll	lm	ll	lm	lm	lm	lm
Marker295172	nnxnp	np	np	np	np	nn	nn	np	nn	np	np	nn	np	np	np	np	nn	np	nn	nn	nn	np	nn	nn	nn	np	np	nn	nn	np	nn	nn	np	np	nn	np	nn	np	np	np	nn	nn	nn	np	nn	np	np	nn	nn
Marker64943	hkxhk	hk	hk	kk	kk	hh	hh	kk	hh	hk	kk	hh	kk	hk	hk	kk	hh	kk	hh	hh	hk	kk	hk	hh	hh	kk	kk	hh	hh	hk	hh	hh	hk	kk	hk	kk	hh	kk	kk	kk	hk	hh	hh	kk	hh	kk	hk	hk	hk
Marker236364	nnxnp	nn	nn	nn	nn	np	np	nn	np	np	nn	np	nn	nn	nn	nn	np	nn	np	np	np	nn	np	np	np	nn	nn	np	np	nn	np	np	nn	nn	np	nn	np	nn	nn	nn	np	np	np	nn	np	nn	nn	np	np
Marker119569	nnxnp	np	np	nn	np	nn	nn	np	nn	nn	np	nn	np	np	np	nn	nn	np	nn	nn	nn	np	nn	nn	nn	np	np	nn	nn	np	nn	nn	np	np	nn	np	nn	np	np	np	nn	nn	nn	np	nn	nn	np	nn	nn
Marker206274	nnxnp	np	np	nn	np	nn	nn	np	nn	nn	np	nn	np	np	np	nn	nn	np	nn	nn	nn	np	nn	nn	nn	np	np	nn	nn	np	nn	nn	np	np	nn	np	nn	np	np	np	nn	nn	nn	np	nn	nn	np	np	nn
Marker252722	nnxnp	np	np	nn	np	nn	nn	np	nn	nn	np	nn	np	np	np	nn	nn	np	nn	nn	nn	np	nn	nn	nn	np	np	np	nn	np	nn	nn	np	np	nn	np	nn	np	np	np	nn	nn	nn	np	nn	nn	np	np	nn
Marker135866	nnxnp	np	np	nn	np	nn	nn	np	nn	nn	np	nn	np	np	np	nn	nn	np	nn	nn	nn	np	nn	nn	nn	np	np	np	nn	np	nn	nn	np	np	nn	np	nn	np	np	np	nn	nn	nn	np	nn	nn	np	np	nn
Marker302168	nnxnp	np	np	nn	np	nn	nn	np	nn	nn	np	nn	np	np	np	nn	nn	np	nn	nn	nn	np	nn	nn	nn	np	np	np	nn	np	nn	nn	np	np	nn	np	nn	np	np	np	nn	nn	nn	nn	nn	nn	np	np	nn
Marker205249	lmxll	lm	ll	lm	ll	ll	ll	lm	ll	ll	ll	ll	lm	ll	ll	lm	ll	lm	ll	ll	lm	lm	ll	ll	lm	lm	lm	ll	ll	ll	ll	ll	ll	lm	lm	lm	ll	lm	lm	lm	lm	ll	ll	lm	ll	ll	ll	lm	lm
Marker510222	hkxhk	kk	hk	hk	hk	hh	hh	kk	hh	hh	hk	hh	kk	hk	hk	hk	hh	kk	hh	hh	hk	kk	hh	hh	hk	kk	kk	hk	hh	hk	hh	hh	hh	kk	hk	kk	hh	kk	kk	kk	hk	hh	hh	--	hh	hh	hk	kk	hk
Marker76041	nnxnp	nn	nn	np	nn	np	np	nn	np	np	nn	np	nn	nn	nn	np	np	nn	np	np	np	nn	np	np	np	nn	nn	nn	np	nn	np	np	np	nn	np	nn	np	nn	nn	nn	np	np	np	np	np	np	nn	nn	np
Marker399657	lmxll	ll	lm	ll	lm	lm	lm	ll	lm	lm	lm	lm	ll	lm	lm	ll	lm	ll	lm	lm	ll	ll	lm	lm	ll	ll	ll	lm	lm	lm	lm	lm	lm	ll	ll	ll	lm	ll	ll	ll	ll	lm	lm	ll	lm	lm	lm	ll	ll
Marker196690	lmxll	lm	lm	ll	ll	ll	ll	lm	lm	ll	ll	lm	ll	ll	lm	ll	lm	ll	lm	lm	ll	lm	ll	ll	lm	lm	ll	lm	lm	lm	lm	lm	lm	lm	lm	lm	ll	lm	lm	lm	ll	ll	lm	lm	ll	lm	lm	lm	ll
Marker420786	lmxll	lm	lm	ll	ll	ll	ll	lm	lm	ll	ll	lm	ll	ll	lm	ll	lm	ll	lm	lm	ll	lm	ll	ll	lm	lm	ll	lm	lm	lm	lm	lm	lm	lm	lm	lm	ll	lm	lm	lm	ll	ll	lm	lm	ll	lm	lm	lm	ll
Marker215820	lmxll	lm	lm	ll	ll	ll	ll	lm	lm	ll	lm	lm	ll	ll	lm	ll	lm	ll	ll	lm	ll	lm	ll	ll	lm	lm	ll	lm	lm	lm	lm	lm	lm	lm	lm	lm	ll	lm	ll	lm	ll	ll	lm	ll	ll	lm	lm	lm	ll
Marker97061	lmxll	lm	lm	ll	ll	ll	ll	lm	lm	ll	lm	lm	ll	ll	lm	ll	lm	ll	ll	lm	ll	lm	ll	ll	lm	lm	ll	lm	lm	lm	lm	lm	lm	lm	lm	lm	lm	lm	ll	lm	ll	ll	lm	ll	ll	lm	ll	ll	ll
Marker137170	lmxll	lm	lm	ll	ll	ll	ll	lm	lm	ll	lm	lm	ll	ll	lm	ll	lm	ll	ll	lm	ll	lm	ll	ll	lm	lm	ll	lm	lm	lm	lm	lm	lm	lm	lm	lm	lm	lm	ll	lm	ll	ll	lm	ll	ll	lm	ll	ll	ll
Marker15357	lmxll	lm	lm	ll	ll	ll	ll	lm	lm	ll	lm	lm	ll	ll	lm	ll	lm	ll	ll	lm	ll	lm	ll	ll	lm	lm	ll	lm	lm	lm	lm	lm	lm	lm	lm	lm	lm	lm	ll	lm	ll	ll	lm	ll	ll	lm	ll	ll	ll
Marker56671	lmxll	lm	lm	ll	lm	ll	ll	lm	lm	ll	lm	lm	ll	ll	lm	ll	lm	ll	ll	lm	lm	lm	ll	ll	lm	lm	ll	lm	lm	lm	lm	lm	lm	lm	lm	lm	lm	lm	ll	lm	ll	ll	lm	ll	ll	lm	ll	ll	ll
Marker483906	lmxll	lm	lm	ll	lm	ll	ll	lm	lm	ll	lm	lm	ll	ll	lm	ll	lm	ll	ll	lm	lm	lm	ll	ll	lm	lm	ll	lm	lm	lm	lm	lm	lm	lm	lm	lm	lm	lm	ll	lm	ll	ll	lm	ll	ll	lm	ll	ll	ll
Marker586664	lmxll	lm	lm	ll	lm	ll	ll	lm	lm	ll	lm	lm	ll	ll	lm	ll	lm	ll	ll	lm	lm	lm	ll	ll	lm	lm	ll	lm	lm	lm	lm	lm	lm	lm	lm	lm	lm	ll	ll	lm	ll	ll	lm	ll	ll	lm	ll	ll	ll
Marker576298	lmxll	ll	ll	lm	ll	lm	lm	ll	ll	lm	ll	ll	lm	lm	ll	lm	ll	lm	lm	ll	ll	ll	lm	lm	ll	ll	lm	ll	ll	ll	ll	ll	ll	ll	ll	ll	ll	lm	lm	ll	lm	lm	ll	lm	lm	ll	lm	lm	ll
Marker427369	lmxll	lm	lm	ll	lm	ll	ll	lm	lm	ll	lm	lm	ll	ll	lm	ll	lm	ll	ll	lm	lm	lm	ll	ll	lm	lm	ll	lm	lm	lm	lm	lm	lm	lm	lm	lm	lm	ll	ll	lm	ll	ll	lm	ll	ll	lm	ll	ll	lm
Marker588277	lmxll	lm	lm	ll	lm	ll	ll	lm	lm	ll	lm	lm	ll	ll	lm	ll	lm	ll	ll	lm	lm	lm	ll	ll	lm	lm	ll	lm	lm	lm	lm	lm	lm	lm	lm	lm	lm	lm	ll	lm	ll	ll	lm	ll	ll	lm	ll	ll	lm
Marker471209	lmxll	lm	lm	ll	lm	ll	ll	lm	lm	ll	lm	lm	ll	ll	lm	ll	lm	ll	ll	lm	lm	lm	ll	ll	lm	lm	ll	lm	lm	lm	lm	lm	lm	lm	lm	lm	lm	lm	ll	lm	ll	ll	lm	ll	ll	lm	ll	ll	lm
Marker515604	lmxll	lm	lm	ll	lm	ll	ll	lm	lm	ll	lm	lm	ll	ll	lm	ll	lm	ll	ll	lm	lm	lm	ll	ll	lm	lm	ll	lm	lm	lm	lm	lm	lm	lm	lm	lm	lm	lm	ll	lm	ll	ll	lm	ll	ll	lm	ll	ll	lm
Marker339072	lmxll	lm	lm	ll	lm	ll	ll	lm	lm	ll	lm	lm	ll	ll	lm	ll	lm	ll	ll	lm	lm	lm	ll	ll	lm	lm	ll	lm	lm	lm	lm	lm	lm	lm	lm	lm	lm	lm	ll	lm	ll	ll	lm	ll	ll	lm	ll	ll	lm
Marker464235	lmxll	ll	ll	lm	ll	lm	lm	ll	ll	lm	ll	ll	lm	lm	ll	lm	ll	lm	lm	ll	ll	ll	lm	lm	ll	ll	lm	ll	ll	ll	ll	ll	ll	ll	ll	ll	ll	lm	lm	ll	lm	lm	ll	lm	lm	ll	lm	lm	ll
Marker455027	lmxll	lm	lm	ll	lm	ll	ll	lm	lm	ll	lm	lm	ll	ll	lm	ll	lm	ll	ll	lm	lm	lm	ll	ll	lm	lm	ll	lm	lm	lm	lm	lm	lm	lm	lm	lm	lm	ll	ll	lm	ll	ll	lm	ll	ll	lm	ll	ll	lm
Marker83255	nnxnp	np	nn	np	nn	np	nn	np	np	np	nn	np	nn	nn	np	nn	np	nn	nn	np	np	nn	np	nn	np	np	nn	nn	nn	nn	nn	np	nn	np	np	np	np	np	np	nn	np	np	nn	nn	np	np	np	nn	np
Marker396685	lmxll	lm	lm	ll	lm	ll	ll	lm	lm	ll	lm	lm	ll	ll	lm	ll	lm	ll	ll	lm	lm	lm	ll	ll	lm	lm	ll	lm	lm	lm	lm	lm	lm	lm	lm	lm	lm	ll	ll	lm	ll	ll	lm	ll	ll	lm	ll	ll	lm
Marker198745	lmxll	lm	lm	ll	lm	ll	ll	lm	lm	ll	lm	lm	ll	ll	lm	ll	lm	ll	ll	lm	lm	lm	ll	ll	lm	lm	ll	lm	lm	lm	lm	lm	lm	lm	lm	lm	lm	ll	ll	lm	ll	ll	lm	ll	ll	lm	ll	ll	lm
Marker85678	lmxll	lm	lm	ll	lm	ll	ll	lm	lm	ll	lm	lm	ll	ll	lm	ll	ll	ll	ll	lm	lm	lm	ll	ll	lm	lm	ll	lm	lm	lm	lm	lm	lm	lm	lm	lm	lm	ll	ll	lm	ll	ll	lm	ll	ll	lm	ll	ll	lm
Marker251518	lmxll	ll	ll	lm	ll	lm	lm	ll	ll	lm	ll	ll	lm	lm	ll	lm	lm	lm	lm	lm	ll	ll	lm	lm	ll	ll	lm	ll	ll	ll	ll	ll	ll	ll	ll	ll	ll	lm	lm	ll	lm	lm	ll	lm	lm	ll	lm	lm	ll
Marker64268	lmxll	ll	ll	lm	ll	lm	lm	ll	ll	lm	ll	lm	lm	lm	ll	lm	lm	lm	lm	lm	ll	ll	lm	lm	ll	ll	lm	ll	ll	ll	ll	ll	ll	ll	ll	ll	ll	lm	lm	ll	lm	lm	lm	lm	lm	ll	lm	lm	ll
Marker335401	nnxnp	nn	np	nn	np	nn	np	np	nn	nn	np	nn	np	np	nn	np	nn	nn	np	nn	nn	nn	nn	np	nn	nn	np	np	np	np	np	nn	np	nn	nn	nn	nn	nn	nn	np	nn	np	np	np	nn	nn	nn	np	nn
Marker358390	hkxhk	hh	hk	hk	hk	hk	kk	hk	hh	hk	hk	hk	kk	kk	hk	kk	hk	hk	kk	hk	hh	hh	hk	kk	hh	hh	kk	hk	hk	hk	hk	hh	hk	hh	hh	hh	hh	hk	hk	hk	hk	kk	kk	kk	hk	hh	hk	kk	hh
Marker324154	lmxll	lm	lm	ll	lm	ll	ll	lm	lm	ll	lm	ll	ll	ll	ll	ll	ll	ll	ll	ll	lm	lm	ll	ll	lm	lm	ll	lm	lm	lm	lm	lm	lm	lm	lm	lm	lm	ll	ll	lm	ll	ll	ll	ll	ll	lm	ll	ll	lm
Marker298909	lmxll	lm	lm	ll	lm	ll	ll	lm	lm	ll	lm	ll	ll	ll	ll	ll	ll	ll	ll	ll	lm	lm	ll	ll	lm	lm	ll	lm	lm	lm	lm	lm	lm	lm	lm	lm	lm	ll	ll	lm	ll	ll	ll	ll	ll	lm	ll	ll	lm
Marker176305	lmxll	ll	ll	lm	ll	lm	lm	ll	ll	lm	ll	lm	lm	lm	lm	lm	lm	lm	lm	lm	ll	ll	lm	lm	ll	ll	lm	ll	ll	ll	ll	ll	ll	ll	ll	ll	ll	lm	lm	ll	lm	lm	lm	lm	lm	ll	lm	lm	ll
Marker336026	lmxll	ll	ll	lm	ll	lm	lm	ll	ll	lm	ll	lm	lm	lm	lm	lm	lm	lm	lm	lm	ll	ll	lm	lm	ll	ll	lm	ll	ll	ll	ll	ll	ll	ll	ll	ll	ll	lm	lm	ll	lm	lm	lm	lm	lm	ll	lm	lm	ll
Marker68909	lmxll	lm	lm	ll	lm	ll	ll	lm	lm	ll	lm	ll	ll	ll	ll	ll	ll	ll	ll	ll	lm	lm	ll	ll	lm	lm	ll	lm	lm	lm	lm	lm	lm	lm	lm	lm	lm	ll	ll	lm	ll	ll	ll	ll	ll	lm	ll	ll	lm
Marker34195	lmxll	ll	ll	lm	ll	lm	lm	ll	ll	lm	ll	lm	lm	lm	lm	lm	lm	lm	lm	lm	ll	ll	lm	lm	ll	ll	lm	ll	ll	ll	ll	ll	ll	ll	ll	ll	ll	lm	lm	ll	lm	lm	lm	lm	lm	ll	lm	lm	ll
Marker669060	lmxll	ll	ll	lm	ll	lm	lm	lm	ll	lm	ll	lm	lm	ll	lm	lm	lm	lm	lm	lm	ll	ll	ll	lm	ll	ll	lm	ll	ll	ll	ll	ll	ll	ll	ll	ll	lm	lm	lm	ll	lm	lm	lm	lm	lm	ll	lm	lm	ll
Marker277262	lmxll	lm	lm	ll	lm	ll	ll	ll	lm	ll	lm	ll	ll	lm	ll	ll	ll	ll	ll	ll	lm	lm	lm	ll	lm	lm	ll	lm	lm	lm	lm	lm	lm	lm	lm	lm	ll	ll	ll	lm	ll	ll	ll	ll	ll	lm	ll	ll	lm
Marker119683	lmxll	lm	lm	ll	lm	ll	ll	ll	lm	ll	lm	ll	ll	lm	ll	ll	ll	ll	ll	ll	lm	lm	lm	ll	lm	lm	ll	lm	lm	lm	lm	lm	lm	lm	lm	lm	ll	ll	ll	lm	ll	ll	ll	ll	ll	lm	ll	ll	lm
Marker279115	lmxll	lm	lm	ll	lm	ll	ll	ll	ll	ll	lm	ll	ll	lm	ll	ll	ll	ll	ll	ll	lm	lm	lm	ll	lm	lm	ll	lm	lm	lm	lm	lm	lm	lm	lm	lm	ll	ll	ll	lm	ll	ll	ll	ll	ll	lm	ll	lm	lm
Marker180744	lmxll	lm	lm	ll	lm	ll	ll	ll	ll	ll	lm	ll	ll	lm	ll	ll	ll	ll	ll	ll	lm	lm	ll	ll	lm	lm	ll	lm	lm	lm	lm	lm	lm	lm	lm	lm	ll	ll	ll	lm	ll	ll	ll	ll	ll	lm	ll	lm	lm
Marker347460	lmxll	ll	ll	lm	ll	lm	lm	lm	lm	lm	ll	lm	lm	ll	lm	lm	lm	lm	lm	lm	ll	ll	lm	lm	ll	ll	lm	ll	ll	ll	ll	ll	ll	ll	ll	ll	lm	lm	lm	ll	lm	lm	lm	lm	lm	ll	lm	ll	ll
Marker515710	lmxll	lm	lm	ll	ll	ll	ll	ll	ll	ll	lm	ll	ll	lm	ll	ll	ll	ll	ll	ll	lm	lm	ll	ll	lm	lm	ll	lm	ll	lm	lm	lm	lm	lm	lm	ll	ll	ll	ll	lm	ll	ll	ll	ll	ll	lm	ll	lm	lm
Marker233583	lmxll	ll	ll	lm	lm	lm	lm	lm	lm	lm	ll	lm	lm	ll	lm	lm	lm	lm	lm	lm	lm	ll	lm	lm	ll	ll	lm	ll	lm	ll	ll	ll	ll	ll	ll	lm	lm	lm	lm	ll	lm	lm	lm	lm	lm	ll	lm	ll	ll
Marker176495	lmxll	lm	lm	ll	ll	ll	ll	ll	ll	ll	lm	ll	ll	lm	ll	ll	ll	ll	ll	ll	ll	lm	ll	ll	lm	lm	ll	lm	ll	lm	lm	lm	lm	lm	lm	ll	ll	ll	ll	lm	ll	ll	ll	ll	ll	lm	ll	lm	lm
Marker166905	lmxll	ll	ll	lm	lm	lm	lm	lm	lm	lm	ll	lm	lm	ll	lm	lm	lm	lm	lm	lm	lm	ll	lm	lm	ll	ll	lm	ll	lm	ll	ll	ll	ll	ll	ll	lm	lm	lm	lm	ll	lm	lm	lm	lm	lm	ll	lm	ll	ll
Marker446253	lmxll	lm	lm	ll	ll	ll	ll	ll	ll	ll	lm	ll	ll	lm	ll	ll	ll	ll	ll	ll	ll	lm	ll	ll	lm	lm	ll	lm	ll	lm	lm	lm	lm	lm	lm	ll	ll	ll	ll	lm	ll	ll	lm	ll	ll	lm	ll	lm	ll
Marker332355	lmxll	ll	ll	lm	lm	lm	lm	lm	lm	lm	ll	lm	lm	ll	lm	lm	lm	lm	lm	lm	lm	ll	lm	lm	ll	ll	lm	ll	lm	ll	ll	ll	ll	ll	ll	lm	lm	lm	lm	ll	lm	lm	ll	lm	lm	ll	lm	ll	lm
Marker224205	lmxll	ll	ll	lm	lm	lm	lm	lm	lm	lm	ll	lm	lm	ll	lm	lm	lm	lm	lm	lm	lm	ll	lm	lm	ll	ll	lm	ll	lm	ll	ll	ll	ll	ll	ll	lm	lm	lm	lm	ll	lm	lm	ll	lm	lm	ll	lm	ll	lm
Marker522681	lmxll	ll	ll	lm	lm	lm	lm	lm	lm	lm	ll	lm	lm	ll	lm	lm	lm	lm	lm	lm	lm	ll	lm	lm	ll	ll	lm	ll	lm	ll	ll	lm	ll	ll	ll	lm	lm	lm	lm	ll	lm	lm	ll	lm	lm	ll	lm	ll	lm
Marker155500	lmxll	ll	ll	lm	lm	lm	lm	lm	lm	lm	ll	lm	lm	ll	lm	lm	lm	lm	lm	lm	lm	ll	lm	lm	ll	ll	lm	ll	lm	ll	ll	lm	ll	ll	ll	ll	lm	lm	lm	ll	lm	lm	ll	lm	lm	ll	lm	ll	lm
Marker345828	lmxll	lm	lm	ll	ll	ll	ll	ll	ll	ll	lm	ll	ll	lm	ll	ll	ll	ll	ll	ll	ll	lm	ll	ll	lm	lm	ll	lm	ll	lm	lm	ll	lm	lm	lm	lm	ll	ll	ll	lm	ll	ll	lm	ll	ll	lm	ll	lm	ll
Marker160860	lmxll	ll	ll	lm	lm	lm	lm	lm	lm	lm	ll	lm	lm	ll	lm	lm	lm	lm	lm	lm	lm	ll	lm	lm	ll	ll	lm	ll	lm	ll	ll	lm	ll	ll	ll	ll	lm	lm	lm	ll	lm	lm	ll	lm	lm	ll	lm	ll	lm
Marker41653	lmxll	lm	lm	ll	ll	ll	ll	ll	ll	ll	lm	ll	ll	lm	ll	ll	ll	ll	ll	ll	ll	lm	ll	ll	lm	lm	ll	lm	ll	lm	lm	ll	lm	lm	lm	lm	ll	ll	ll	lm	ll	ll	lm	ll	ll	lm	ll	lm	ll
Marker268378	lmxll	lm	lm	ll	ll	ll	ll	ll	ll	ll	lm	ll	ll	lm	ll	ll	ll	ll	ll	ll	ll	lm	ll	ll	lm	lm	ll	lm	ll	lm	lm	ll	lm	lm	lm	lm	ll	ll	ll	lm	ll	ll	lm	ll	ll	lm	ll	lm	ll
Marker410891	lmxll	ll	ll	lm	lm	lm	lm	lm	lm	lm	ll	lm	lm	ll	lm	lm	lm	lm	lm	lm	lm	ll	lm	lm	ll	ll	lm	ll	lm	ll	ll	lm	ll	ll	ll	ll	lm	lm	lm	ll	lm	lm	ll	lm	lm	ll	lm	ll	lm
Marker440640	lmxll	lm	lm	ll	ll	ll	ll	ll	ll	ll	lm	ll	ll	lm	ll	ll	ll	ll	ll	ll	ll	lm	ll	ll	lm	lm	ll	lm	ll	lm	lm	ll	lm	lm	lm	lm	ll	ll	ll	lm	ll	ll	lm	ll	ll	lm	ll	lm	ll
Marker278303	lmxll	ll	ll	lm	lm	lm	lm	lm	lm	lm	ll	lm	lm	ll	lm	lm	lm	lm	lm	lm	lm	ll	lm	lm	ll	ll	lm	ll	lm	ll	ll	lm	ll	ll	ll	ll	lm	lm	lm	ll	lm	lm	ll	lm	lm	ll	lm	ll	lm
Marker144815	lmxll	lm	lm	ll	ll	ll	ll	ll	ll	ll	lm	ll	ll	lm	ll	ll	ll	ll	ll	ll	ll	lm	ll	ll	lm	lm	ll	lm	ll	lm	lm	ll	lm	lm	lm	lm	ll	ll	ll	lm	ll	ll	lm	ll	ll	lm	ll	lm	ll
Marker259074	lmxll	ll	ll	lm	lm	lm	lm	lm	lm	lm	ll	lm	lm	ll	lm	lm	lm	lm	lm	lm	lm	ll	lm	lm	ll	ll	lm	ll	lm	ll	ll	lm	ll	ll	ll	ll	lm	lm	lm	ll	lm	lm	ll	lm	lm	ll	lm	ll	lm
Marker211639	lmxll	lm	lm	ll	ll	ll	ll	ll	ll	ll	lm	ll	ll	lm	ll	ll	ll	ll	ll	ll	ll	lm	ll	ll	lm	lm	ll	lm	ll	lm	lm	ll	lm	lm	lm	lm	ll	ll	ll	lm	ll	ll	lm	ll	ll	lm	ll	lm	ll
Marker123879	lmxll	lm	lm	ll	ll	ll	ll	ll	ll	ll	lm	ll	ll	lm	ll	ll	ll	ll	ll	ll	ll	lm	ll	ll	lm	lm	ll	lm	ll	lm	lm	ll	lm	lm	lm	lm	ll	ll	ll	lm	ll	ll	lm	ll	ll	lm	ll	lm	ll
Marker291517	lmxll	ll	ll	lm	lm	lm	lm	lm	lm	lm	ll	lm	lm	ll	lm	lm	lm	lm	lm	lm	lm	ll	lm	lm	ll	ll	lm	ll	lm	ll	ll	lm	ll	ll	ll	ll	lm	lm	lm	ll	lm	lm	ll	lm	lm	ll	lm	ll	lm
Marker396204	lmxll	lm	lm	ll	ll	ll	ll	ll	ll	ll	lm	ll	ll	lm	ll	ll	ll	ll	ll	ll	ll	lm	ll	ll	lm	lm	ll	lm	ll	lm	lm	ll	lm	lm	lm	lm	ll	ll	ll	lm	ll	ll	lm	ll	ll	lm	ll	lm	ll
Marker219980	lmxll	ll	ll	lm	lm	lm	lm	lm	lm	lm	ll	lm	lm	ll	lm	lm	lm	lm	lm	lm	lm	ll	lm	lm	ll	ll	lm	ll	lm	ll	ll	lm	ll	ll	ll	ll	lm	lm	lm	ll	lm	lm	ll	lm	lm	ll	lm	ll	lm
Marker175002	lmxll	ll	ll	lm	lm	lm	lm	lm	lm	lm	ll	lm	lm	ll	lm	lm	lm	lm	lm	lm	lm	ll	lm	lm	ll	ll	lm	ll	lm	ll	ll	lm	ll	ll	ll	ll	lm	lm	lm	ll	lm	lm	ll	lm	lm	ll	lm	ll	lm
Marker274928	lmxll	ll	ll	lm	lm	lm	lm	lm	lm	lm	ll	lm	lm	ll	lm	lm	lm	lm	lm	lm	lm	ll	lm	lm	ll	ll	lm	ll	lm	ll	ll	lm	ll	ll	ll	ll	lm	lm	lm	ll	lm	lm	ll	lm	lm	ll	lm	ll	lm
Marker178589	lmxll	ll	ll	lm	lm	lm	lm	lm	lm	lm	ll	lm	lm	ll	lm	lm	lm	lm	lm	lm	lm	ll	lm	lm	ll	ll	lm	ll	lm	ll	ll	lm	ll	ll	ll	ll	lm	lm	lm	ll	lm	lm	ll	lm	lm	ll	lm	ll	lm
Marker369123	lmxll	lm	lm	ll	ll	ll	ll	ll	ll	ll	lm	ll	ll	lm	ll	ll	ll	ll	ll	ll	ll	lm	ll	ll	lm	lm	ll	lm	ll	lm	lm	ll	lm	lm	lm	lm	ll	ll	ll	lm	ll	ll	lm	ll	ll	lm	ll	lm	ll
Marker58757	lmxll	lm	lm	ll	ll	ll	ll	ll	ll	ll	lm	ll	ll	lm	ll	ll	ll	ll	ll	ll	ll	lm	ll	ll	lm	lm	ll	lm	ll	lm	lm	ll	lm	lm	lm	lm	ll	ll	ll	lm	ll	ll	lm	ll	ll	lm	ll	lm	ll
Marker182831	lmxll	lm	lm	ll	ll	ll	ll	ll	ll	ll	lm	ll	ll	lm	ll	ll	ll	ll	ll	ll	ll	lm	ll	ll	lm	lm	ll	lm	ll	lm	lm	ll	lm	lm	lm	lm	ll	ll	ll	lm	ll	ll	lm	ll	ll	lm	ll	lm	ll
Marker87276	hkxhk	--	--	--	kk	--	--	--	--	--	hh	--	kk	--	--	kk	--	kk	kk	--	--	hh	--	kk	hh	--	kk	hh	kk	--	--	kk	--	hh	hh	hh	--	--	--	--	--	--	--	kk	--	hh	--	--	--
Marker60212	nnxnp	np	nn	np	nn	np	nn	np	np	np	np	np	nn	nn	nn	nn	np	nn	nn	np	np	np	np	nn	np	np	nn	np	nn	nn	nn	nn	nn	np	np	np	np	np	np	nn	np	nn	nn	nn	np	np	np	nn	np
Marker396484	lmxll	lm	lm	ll	ll	ll	ll	ll	ll	ll	lm	ll	ll	lm	ll	ll	ll	ll	ll	ll	ll	lm	ll	ll	lm	lm	ll	lm	ll	lm	lm	ll	lm	lm	lm	lm	ll	ll	ll	lm	ll	ll	lm	ll	ll	lm	ll	lm	ll
Marker404061	lmxll	ll	ll	lm	lm	lm	lm	lm	lm	lm	ll	lm	lm	ll	lm	lm	lm	lm	lm	lm	lm	ll	lm	lm	ll	ll	lm	ll	lm	ll	ll	lm	ll	ll	ll	ll	lm	lm	lm	ll	lm	lm	ll	lm	lm	ll	lm	ll	lm
Marker496779	lmxll	ll	ll	lm	lm	lm	lm	lm	lm	lm	lm	lm	lm	ll	lm	lm	lm	lm	lm	lm	lm	ll	lm	lm	ll	ll	lm	lm	lm	ll	ll	lm	ll	ll	ll	ll	lm	lm	lm	ll	lm	lm	ll	lm	lm	ll	lm	ll	lm
Marker36496	lmxll	ll	ll	lm	lm	lm	lm	lm	lm	lm	lm	lm	lm	ll	lm	lm	lm	lm	lm	lm	lm	ll	lm	lm	ll	ll	lm	lm	lm	ll	ll	lm	ll	ll	ll	ll	lm	lm	lm	ll	lm	lm	ll	lm	lm	ll	lm	ll	lm
Marker88291	lmxll	ll	ll	lm	lm	lm	lm	lm	lm	lm	lm	lm	lm	ll	lm	lm	lm	lm	lm	lm	lm	ll	lm	lm	ll	ll	lm	lm	lm	ll	ll	lm	ll	ll	ll	ll	lm	lm	lm	ll	lm	lm	ll	lm	lm	ll	lm	ll	lm
Marker64233	lmxll	lm	lm	ll	ll	ll	ll	ll	ll	ll	ll	ll	ll	lm	ll	ll	ll	ll	ll	ll	ll	lm	ll	ll	lm	lm	ll	ll	ll	lm	lm	ll	lm	lm	lm	lm	ll	ll	ll	lm	ll	ll	lm	ll	ll	lm	ll	lm	ll
Marker245679	lmxll	ll	ll	lm	lm	lm	lm	lm	lm	lm	lm	lm	lm	ll	lm	lm	lm	lm	lm	lm	lm	ll	lm	lm	ll	ll	lm	lm	lm	ll	ll	lm	ll	ll	ll	ll	lm	lm	lm	ll	lm	lm	ll	lm	lm	ll	lm	ll	lm
Marker159127	lmxll	lm	lm	ll	ll	ll	ll	ll	ll	ll	ll	ll	ll	lm	ll	ll	ll	ll	ll	ll	ll	lm	ll	ll	lm	lm	ll	ll	ll	lm	lm	ll	lm	lm	lm	lm	ll	ll	ll	lm	ll	ll	lm	ll	ll	lm	ll	lm	ll
Marker445965	lmxll	ll	ll	lm	lm	lm	lm	lm	lm	lm	lm	lm	lm	ll	lm	lm	lm	lm	lm	lm	lm	ll	lm	lm	ll	ll	lm	lm	lm	ll	ll	lm	ll	ll	ll	ll	lm	lm	lm	ll	lm	lm	ll	lm	lm	ll	lm	ll	lm
Marker457865	lmxll	ll	ll	lm	lm	lm	lm	lm	lm	lm	lm	lm	lm	lm	lm	lm	lm	lm	lm	lm	lm	ll	lm	lm	ll	ll	lm	lm	lm	ll	ll	lm	ll	ll	ll	ll	lm	lm	lm	ll	lm	lm	ll	lm	lm	ll	lm	ll	lm
Marker256938	lmxll	lm	lm	ll	ll	ll	ll	ll	ll	ll	ll	ll	ll	ll	ll	ll	ll	ll	ll	ll	ll	lm	ll	ll	lm	lm	ll	ll	ll	lm	lm	ll	lm	lm	lm	lm	ll	ll	ll	lm	ll	ll	lm	ll	ll	lm	ll	lm	ll
Marker250999	lmxll	ll	ll	lm	lm	lm	lm	lm	lm	lm	lm	lm	lm	lm	lm	lm	lm	lm	lm	lm	lm	ll	lm	lm	ll	ll	lm	lm	lm	ll	ll	lm	ll	ll	ll	ll	lm	lm	lm	ll	lm	lm	ll	lm	lm	ll	lm	ll	lm
Marker114868	lmxll	ll	ll	lm	lm	lm	lm	lm	lm	lm	lm	lm	lm	lm	lm	lm	lm	lm	lm	lm	lm	ll	lm	lm	ll	ll	lm	lm	lm	ll	ll	lm	ll	ll	ll	ll	lm	lm	lm	ll	lm	lm	ll	lm	lm	ll	lm	ll	lm
Marker299483	lmxll	ll	ll	lm	lm	lm	lm	lm	lm	lm	lm	lm	lm	lm	lm	lm	lm	lm	lm	lm	lm	ll	lm	lm	ll	ll	lm	lm	lm	ll	ll	lm	ll	ll	ll	ll	lm	lm	lm	ll	lm	lm	ll	lm	lm	ll	lm	ll	lm
Marker553257	lmxll	ll	ll	lm	lm	lm	lm	lm	lm	lm	lm	lm	lm	lm	lm	lm	lm	lm	lm	lm	lm	ll	lm	lm	ll	ll	lm	lm	lm	ll	ll	lm	ll	ll	ll	ll	lm	lm	lm	ll	lm	lm	ll	lm	lm	ll	lm	ll	lm
Marker157270	lmxll	ll	ll	lm	lm	lm	lm	lm	lm	lm	lm	lm	lm	lm	lm	lm	lm	lm	lm	lm	lm	ll	lm	lm	ll	ll	lm	lm	lm	ll	ll	lm	ll	ll	ll	ll	lm	lm	lm	ll	lm	lm	ll	lm	lm	ll	lm	ll	lm
Marker442036	lmxll	lm	lm	ll	ll	ll	ll	ll	ll	ll	ll	ll	ll	ll	ll	ll	ll	ll	ll	ll	ll	lm	ll	ll	lm	lm	ll	ll	ll	lm	lm	ll	lm	lm	lm	lm	ll	ll	ll	lm	ll	ll	lm	ll	ll	lm	ll	lm	ll
Marker471333	lmxll	ll	ll	lm	lm	lm	lm	lm	lm	lm	lm	lm	lm	lm	lm	lm	lm	lm	lm	lm	lm	ll	lm	lm	ll	ll	lm	lm	lm	ll	ll	lm	ll	ll	ll	ll	lm	lm	lm	ll	lm	lm	ll	lm	lm	ll	lm	ll	lm
Marker355571	lmxll	ll	ll	lm	lm	lm	lm	lm	lm	lm	lm	lm	lm	lm	lm	lm	lm	lm	lm	lm	lm	ll	lm	lm	ll	ll	lm	lm	lm	ll	ll	lm	ll	ll	ll	ll	lm	lm	lm	ll	lm	lm	ll	lm	lm	ll	lm	ll	lm
Marker224675	lmxll	ll	ll	lm	lm	lm	lm	lm	lm	lm	lm	lm	lm	lm	lm	lm	lm	lm	lm	lm	lm	ll	lm	lm	ll	ll	lm	lm	lm	ll	ll	lm	ll	ll	ll	ll	lm	lm	lm	ll	lm	lm	ll	lm	lm	ll	lm	ll	lm
Marker540764	lmxll	ll	ll	lm	lm	lm	lm	lm	lm	lm	lm	lm	lm	lm	lm	lm	lm	lm	lm	lm	lm	ll	lm	lm	ll	ll	lm	lm	lm	ll	ll	lm	ll	ll	ll	ll	lm	lm	lm	ll	lm	lm	ll	lm	lm	ll	lm	ll	lm
Marker382383	lmxll	ll	ll	lm	lm	lm	lm	lm	lm	lm	lm	lm	lm	lm	lm	lm	lm	lm	lm	lm	lm	ll	lm	lm	ll	ll	lm	lm	lm	ll	ll	lm	ll	ll	ll	ll	lm	lm	lm	ll	lm	lm	ll	lm	lm	ll	lm	ll	lm
Marker383150	lmxll	ll	ll	lm	lm	lm	lm	lm	lm	lm	lm	lm	lm	lm	lm	lm	lm	lm	lm	lm	lm	ll	lm	lm	ll	ll	lm	lm	lm	ll	ll	lm	ll	ll	ll	ll	lm	lm	lm	ll	lm	lm	ll	lm	lm	ll	lm	ll	lm
Marker456843	lmxll	ll	ll	lm	lm	lm	lm	lm	lm	lm	lm	lm	lm	lm	lm	lm	lm	lm	lm	lm	lm	ll	lm	lm	ll	ll	lm	lm	lm	ll	ll	lm	ll	ll	ll	ll	lm	lm	lm	ll	lm	lm	ll	lm	lm	ll	lm	ll	lm
Marker228835	lmxll	ll	ll	lm	lm	lm	lm	lm	lm	lm	lm	lm	lm	lm	lm	lm	lm	lm	lm	lm	lm	ll	lm	lm	ll	ll	lm	lm	lm	ll	ll	lm	ll	ll	ll	ll	lm	lm	lm	ll	lm	lm	ll	lm	lm	ll	lm	ll	lm
Marker468224	lmxll	ll	ll	lm	lm	lm	lm	lm	lm	ll	lm	lm	lm	lm	lm	lm	lm	lm	lm	lm	lm	ll	lm	lm	ll	ll	lm	lm	lm	ll	ll	lm	ll	ll	ll	ll	lm	lm	lm	ll	lm	lm	ll	lm	lm	ll	lm	ll	lm
Marker284681	lmxll	ll	ll	lm	lm	lm	lm	lm	lm	ll	lm	lm	lm	lm	lm	lm	lm	lm	lm	lm	lm	ll	lm	lm	ll	lm	lm	lm	ll	ll	ll	lm	ll	ll	ll	ll	lm	lm	lm	ll	lm	lm	ll	lm	lm	ll	lm	ll	lm
Marker369971	lmxll	lm	lm	ll	ll	ll	ll	ll	ll	lm	ll	ll	ll	ll	ll	ll	ll	lm	ll	ll	ll	lm	ll	ll	lm	ll	ll	ll	lm	lm	lm	ll	lm	lm	lm	lm	ll	ll	ll	lm	ll	ll	lm	ll	ll	lm	ll	lm	ll
Marker448774	lmxll	lm	lm	ll	ll	ll	ll	ll	ll	lm	ll	ll	ll	ll	ll	ll	ll	lm	ll	ll	ll	lm	ll	ll	lm	ll	ll	ll	lm	lm	lm	ll	lm	lm	lm	lm	ll	ll	ll	lm	ll	ll	lm	ll	ll	lm	ll	lm	ll
Marker417516	lmxll	ll	ll	lm	lm	lm	lm	lm	lm	ll	lm	lm	lm	lm	lm	lm	lm	ll	lm	lm	lm	lm	lm	lm	ll	lm	lm	lm	ll	ll	ll	lm	ll	ll	ll	ll	lm	lm	lm	ll	lm	lm	ll	lm	lm	ll	lm	ll	lm
Marker265766	lmxll	ll	ll	lm	lm	lm	lm	lm	lm	ll	lm	lm	ll	lm	lm	lm	lm	ll	lm	lm	lm	ll	lm	lm	ll	lm	lm	lm	ll	ll	ll	lm	ll	ll	ll	ll	lm	lm	lm	ll	lm	lm	ll	lm	lm	ll	ll	ll	lm
Marker589240	lmxll	lm	lm	ll	ll	ll	ll	ll	ll	lm	ll	ll	lm	ll	ll	ll	ll	lm	ll	ll	ll	ll	ll	ll	lm	ll	ll	ll	lm	lm	lm	ll	lm	lm	lm	lm	ll	ll	ll	lm	ll	ll	lm	ll	ll	lm	lm	lm	lm
Marker112751	lmxll	lm	lm	ll	ll	ll	ll	ll	ll	lm	ll	ll	lm	ll	ll	ll	ll	lm	ll	ll	ll	ll	ll	ll	lm	ll	ll	ll	lm	lm	lm	ll	lm	lm	lm	lm	ll	ll	ll	lm	ll	ll	lm	ll	ll	lm	lm	lm	lm
Marker321327	lmxll	lm	lm	ll	ll	ll	ll	ll	ll	lm	ll	lm	lm	ll	ll	ll	ll	lm	ll	ll	ll	ll	ll	ll	lm	ll	ll	ll	lm	lm	lm	ll	lm	lm	lm	lm	ll	ll	ll	lm	ll	ll	lm	ll	ll	lm	lm	lm	lm
Marker25321	lmxll	ll	ll	lm	lm	lm	lm	lm	lm	ll	ll	ll	ll	lm	lm	lm	lm	ll	ll	lm	lm	lm	lm	lm	ll	lm	lm	lm	ll	ll	ll	lm	ll	ll	ll	ll	lm	ll	lm	ll	lm	lm	ll	lm	lm	ll	ll	ll	ll
Marker67292	lmxll	ll	ll	lm	lm	lm	lm	lm	lm	ll	ll	ll	ll	lm	lm	lm	lm	ll	ll	lm	lm	lm	lm	lm	ll	lm	lm	lm	ll	ll	ll	lm	ll	ll	ll	ll	lm	ll	lm	ll	lm	lm	ll	lm	lm	ll	ll	ll	ll
Marker149969	lmxll	lm	lm	ll	ll	ll	ll	ll	ll	lm	lm	lm	lm	ll	lm	ll	ll	lm	lm	ll	ll	ll	ll	ll	lm	ll	ll	ll	lm	lm	lm	ll	lm	lm	lm	lm	ll	lm	ll	lm	ll	ll	lm	ll	ll	lm	lm	lm	lm
Marker192440	lmxll	ll	ll	lm	lm	lm	lm	ll	lm	ll	ll	ll	ll	lm	ll	lm	ll	ll	ll	lm	lm	lm	lm	lm	ll	lm	lm	lm	ll	ll	ll	lm	ll	ll	ll	ll	lm	ll	lm	ll	lm	lm	ll	lm	lm	ll	ll	ll	ll
Marker401060	lmxll	lm	lm	ll	ll	ll	ll	lm	ll	lm	lm	lm	lm	ll	lm	ll	lm	lm	lm	ll	ll	ll	ll	ll	lm	ll	ll	ll	lm	lm	lm	ll	lm	lm	lm	lm	ll	lm	ll	lm	ll	ll	lm	ll	ll	lm	lm	lm	lm
Marker210848	lmxll	lm	lm	ll	ll	ll	ll	lm	ll	lm	lm	lm	lm	ll	lm	ll	lm	lm	lm	ll	ll	ll	ll	ll	lm	ll	ll	ll	lm	lm	lm	ll	lm	lm	lm	lm	ll	lm	ll	lm	ll	ll	lm	ll	ll	lm	lm	lm	lm
Marker90960	lmxll	lm	ll	ll	ll	lm	ll	ll	ll	ll	ll	lm	lm	ll	lm	ll	lm	ll	lm	lm	lm	ll	ll	ll	lm	ll	lm	ll	lm	ll	ll	ll	ll	ll	ll	lm	ll	lm	ll	ll	ll	lm	lm	ll	ll	lm	lm	lm	ll
Marker45593	lmxll	ll	lm	lm	lm	ll	lm	lm	lm	lm	lm	ll	ll	lm	ll	lm	ll	lm	ll	ll	ll	lm	lm	lm	ll	lm	ll	lm	ll	lm	lm	lm	lm	lm	lm	ll	lm	ll	lm	lm	lm	ll	ll	lm	lm	ll	ll	ll	lm
Marker360129	lmxll	ll	lm	lm	lm	ll	lm	lm	lm	lm	lm	ll	ll	lm	ll	lm	ll	ll	ll	ll	ll	lm	lm	lm	ll	lm	ll	lm	lm	lm	lm	lm	lm	lm	lm	--	lm	ll	lm	lm	lm	ll	ll	lm	lm	ll	lm	ll	lm
Marker222217	lmxll	ll	lm	lm	lm	ll	lm	lm	lm	lm	lm	ll	ll	lm	ll	lm	ll	ll	ll	ll	ll	lm	lm	lm	ll	lm	ll	lm	lm	lm	lm	lm	lm	lm	lm	lm	lm	ll	lm	lm	lm	ll	ll	lm	lm	ll	lm	ll	lm
Marker139662	lmxll	lm	ll	lm	ll	lm	ll	ll	ll	ll	ll	ll	lm	ll	lm	ll	lm	lm	lm	lm	lm	ll	ll	ll	lm	ll	lm	ll	ll	ll	ll	ll	ll	ll	ll	ll	ll	lm	ll	ll	ll	lm	lm	ll	ll	lm	ll	lm	ll
Marker130678	lmxll	ll	lm	ll	lm	ll	lm	lm	lm	lm	lm	lm	ll	lm	ll	lm	ll	ll	ll	ll	ll	lm	lm	lm	ll	lm	ll	lm	lm	lm	lm	lm	lm	lm	lm	lm	lm	ll	lm	lm	lm	ll	ll	lm	lm	ll	lm	ll	lm
Marker205520	lmxll	ll	lm	ll	lm	ll	lm	lm	lm	lm	lm	lm	ll	lm	lm	lm	ll	ll	ll	ll	lm	lm	lm	lm	ll	lm	ll	lm	lm	lm	lm	lm	lm	lm	lm	lm	lm	ll	lm	lm	lm	ll	ll	lm	lm	ll	lm	ll	lm
Marker144860	lmxll	ll	lm	ll	lm	ll	lm	lm	lm	lm	lm	lm	ll	lm	lm	lm	lm	ll	ll	ll	lm	lm	lm	lm	ll	lm	ll	lm	lm	lm	lm	lm	lm	lm	lm	lm	lm	ll	lm	lm	lm	ll	ll	lm	lm	ll	lm	ll	lm
Marker248128	lmxll	ll	lm	ll	lm	ll	lm	lm	lm	lm	lm	lm	ll	lm	lm	lm	lm	ll	ll	ll	lm	lm	lm	lm	ll	lm	ll	lm	lm	lm	lm	lm	lm	lm	lm	lm	lm	ll	lm	lm	lm	ll	ll	lm	lm	ll	lm	ll	lm
Marker332636	lmxll	lm	ll	lm	ll	lm	ll	ll	ll	ll	ll	ll	lm	ll	ll	ll	ll	lm	lm	lm	ll	ll	ll	ll	lm	ll	lm	ll	ll	ll	ll	ll	ll	ll	ll	ll	ll	lm	ll	ll	ll	lm	lm	ll	ll	lm	ll	lm	ll
Marker245348	lmxll	lm	ll	lm	ll	lm	ll	ll	ll	ll	ll	ll	lm	ll	ll	ll	ll	lm	lm	lm	ll	ll	ll	ll	lm	ll	lm	ll	ll	ll	ll	ll	ll	ll	ll	ll	ll	lm	ll	ll	ll	lm	lm	ll	ll	lm	ll	lm	ll
Marker249666	lmxll	ll	lm	ll	lm	ll	lm	lm	lm	lm	lm	lm	ll	lm	lm	lm	lm	ll	ll	ll	lm	lm	lm	lm	ll	lm	ll	lm	lm	lm	lm	lm	lm	lm	lm	lm	lm	ll	lm	lm	lm	ll	ll	lm	lm	ll	lm	ll	lm
Marker146785	lmxll	lm	ll	lm	ll	lm	ll	ll	ll	ll	ll	ll	lm	ll	ll	ll	ll	lm	lm	lm	ll	ll	ll	ll	lm	ll	lm	ll	ll	ll	ll	ll	ll	ll	ll	lm	ll	lm	ll	ll	ll	lm	lm	ll	ll	lm	ll	lm	ll
Marker441375	lmxll	ll	lm	ll	ll	ll	lm	lm	lm	lm	lm	lm	ll	lm	lm	lm	lm	ll	ll	ll	lm	lm	lm	lm	ll	lm	ll	lm	lm	lm	lm	lm	lm	lm	lm	ll	lm	ll	lm	lm	lm	ll	ll	lm	ll	ll	lm	ll	lm
Marker184788	lmxll	lm	ll	lm	lm	lm	ll	ll	ll	ll	ll	ll	lm	ll	ll	ll	ll	lm	lm	lm	ll	ll	ll	lm	lm	ll	lm	ll	ll	ll	ll	ll	ll	ll	ll	lm	ll	lm	ll	ll	ll	lm	lm	ll	lm	lm	lm	lm	ll
Marker175886	lmxll	ll	lm	ll	ll	ll	lm	lm	lm	lm	lm	lm	ll	lm	lm	lm	lm	ll	ll	ll	lm	lm	lm	ll	ll	lm	ll	lm	lm	lm	lm	lm	lm	lm	lm	ll	lm	ll	lm	lm	lm	ll	ll	lm	ll	ll	ll	ll	lm
Marker783418	lmxll	lm	ll	lm	lm	lm	ll	ll	ll	ll	ll	ll	lm	ll	ll	ll	ll	lm	lm	lm	ll	lm	ll	lm	lm	ll	lm	ll	ll	ll	ll	ll	ll	ll	ll	lm	ll	lm	ll	ll	ll	lm	lm	ll	lm	lm	lm	lm	ll
Marker345247	lmxll	ll	lm	ll	ll	ll	lm	lm	lm	lm	lm	lm	ll	lm	lm	lm	lm	ll	ll	ll	lm	ll	lm	ll	ll	lm	ll	lm	lm	lm	lm	lm	ll	lm	lm	ll	lm	ll	lm	lm	lm	ll	ll	lm	ll	ll	ll	ll	lm
Marker419750	lmxll	ll	lm	ll	ll	ll	lm	lm	lm	lm	lm	lm	ll	lm	lm	lm	lm	ll	ll	ll	lm	ll	lm	ll	ll	lm	ll	lm	lm	lm	lm	lm	lm	lm	lm	ll	lm	ll	lm	lm	lm	ll	ll	lm	ll	ll	ll	ll	lm
Marker111543	lmxll	lm	ll	lm	lm	lm	ll	ll	ll	ll	ll	ll	lm	ll	ll	ll	ll	ll	lm	lm	ll	lm	ll	lm	lm	ll	lm	ll	ll	ll	ll	ll	lm	ll	ll	lm	ll	lm	ll	ll	ll	lm	lm	ll	lm	lm	lm	lm	ll
Marker389120	lmxll	ll	lm	ll	ll	ll	lm	lm	lm	lm	lm	lm	ll	lm	lm	lm	lm	lm	ll	ll	lm	ll	lm	ll	ll	lm	ll	lm	lm	lm	lm	lm	ll	lm	lm	ll	lm	ll	lm	lm	lm	ll	ll	lm	ll	ll	ll	ll	lm
Marker410663	lmxll	lm	ll	lm	lm	lm	ll	ll	ll	ll	ll	ll	lm	ll	ll	ll	ll	ll	lm	lm	ll	lm	ll	lm	lm	ll	lm	ll	ll	ll	ll	ll	ll	ll	ll	lm	ll	lm	ll	ll	ll	lm	lm	lm	lm	lm	lm	lm	ll
Marker136145	lmxll	lm	ll	lm	lm	lm	ll	ll	ll	ll	ll	ll	lm	ll	ll	ll	ll	ll	lm	lm	ll	lm	ll	lm	lm	ll	lm	ll	ll	ll	ll	ll	ll	ll	ll	lm	ll	lm	ll	ll	ll	lm	lm	lm	lm	lm	lm	lm	ll
Marker282756	lmxll	ll	lm	ll	ll	ll	lm	lm	lm	lm	lm	lm	ll	lm	lm	lm	lm	lm	ll	ll	lm	ll	lm	ll	ll	lm	ll	lm	lm	lm	lm	lm	lm	lm	lm	ll	lm	ll	lm	lm	lm	ll	ll	ll	ll	ll	ll	ll	lm
Marker233349	lmxll	lm	ll	lm	lm	lm	ll	ll	ll	ll	ll	ll	lm	ll	ll	ll	ll	ll	lm	lm	ll	lm	ll	lm	lm	ll	lm	ll	ll	ll	ll	ll	lm	ll	ll	lm	ll	lm	ll	ll	ll	lm	lm	lm	lm	lm	lm	lm	ll
Marker393934	lmxll	ll	lm	ll	ll	ll	lm	lm	lm	lm	lm	lm	ll	lm	ll	lm	ll	lm	ll	ll	lm	ll	lm	ll	ll	lm	ll	lm	lm	lm	lm	lm	lm	lm	lm	ll	lm	ll	lm	lm	lm	ll	ll	ll	ll	ll	ll	ll	lm
Marker61593	lmxll	lm	ll	lm	lm	lm	ll	ll	ll	ll	ll	ll	lm	ll	lm	ll	ll	ll	lm	lm	ll	lm	ll	lm	lm	ll	lm	ll	ll	ll	ll	ll	ll	ll	ll	lm	lm	lm	ll	ll	ll	lm	lm	lm	lm	lm	lm	lm	ll
Marker484859	lmxll	ll	lm	ll	ll	ll	lm	lm	lm	lm	lm	lm	ll	lm	ll	lm	ll	lm	ll	ll	lm	ll	lm	ll	ll	lm	ll	lm	lm	lm	lm	lm	lm	lm	ll	ll	ll	ll	lm	lm	lm	ll	ll	ll	ll	ll	ll	ll	lm
Marker661051	lmxll	lm	ll	lm	lm	lm	ll	ll	ll	ll	ll	ll	lm	ll	lm	ll	lm	ll	lm	lm	ll	lm	ll	lm	lm	ll	ll	ll	ll	ll	ll	ll	ll	ll	lm	lm	lm	lm	ll	ll	ll	lm	lm	lm	lm	lm	lm	lm	ll
Marker88027	lmxll	ll	lm	ll	ll	ll	lm	lm	lm	lm	lm	lm	ll	lm	ll	lm	ll	lm	ll	ll	lm	ll	lm	ll	ll	lm	lm	lm	lm	lm	ll	lm	lm	lm	ll	ll	ll	ll	lm	lm	lm	ll	ll	ll	ll	ll	ll	ll	lm
Marker280272	lmxll	lm	ll	lm	lm	lm	ll	ll	ll	ll	ll	ll	lm	ll	lm	ll	lm	ll	lm	lm	ll	lm	ll	lm	lm	ll	ll	ll	ll	ll	lm	ll	ll	ll	lm	lm	lm	lm	ll	ll	ll	lm	lm	lm	lm	lm	lm	lm	ll
Marker437486	nnxnp	np	np	nn	nn	nn	np	nn	np	np	nn	np	nn	np	nn	nn	np	np	np	np	np	nn	np	nn	np	np	nn	np	np	np	nn	nn	np	np	np	nn	nn	nn	np	nn	np	nn	nn	nn	np	np	nn	np	nn
Marker130881	nnxnp	np	np	nn	nn	nn	np	nn	np	np	nn	np	nn	np	nn	nn	np	np	np	np	np	nn	np	nn	np	np	nn	np	np	np	nn	nn	np	np	np	nn	nn	nn	np	nn	np	nn	nn	nn	np	np	nn	np	nn
Marker433063	hkxhk	hh	hk	kk	kk	kk	hh	hk	hh	hh	hk	hh	kk	hh	kk	hk	hk	hh	hk	hk	hh	kk	hh	kk	hk	hh	hk	hh	hh	hh	kk	hk	hh	hh	hk	--	kk	kk	hh	hk	hh	kk	kk	kk	hk	hk	kk	hk	hk
Marker520906	hkxhk	kk	hk	hh	hh	hh	kk	hk	kk	kk	hk	kk	hh	kk	hh	hk	hk	kk	hk	hk	kk	hh	kk	hh	hk	kk	hk	kk	kk	kk	hh	hk	kk	kk	hk	hk	hh	hh	kk	hk	kk	hh	hh	hh	hk	hk	hh	hk	hk
Marker328996	nnxnp	nn	nn	np	np	np	nn	np	nn	nn	np	nn	np	nn	np	np	nn	nn	nn	nn	nn	np	nn	np	nn	nn	np	nn	nn	nn	np	np	nn	nn	nn	np	np	np	nn	np	nn	np	np	np	nn	nn	np	nn	np
Marker241868	nnxnp	nn	nn	np	np	np	nn	np	nn	nn	np	nn	np	nn	np	np	nn	nn	nn	nn	nn	np	nn	np	nn	nn	np	nn	nn	nn	np	np	nn	nn	nn	np	np	np	nn	np	nn	np	np	np	nn	nn	np	nn	np
Marker266728	lmxll	lm	ll	lm	ll	ll	lm	lm	lm	lm	lm	lm	ll	lm	ll	lm	ll	lm	ll	ll	lm	ll	lm	ll	lm	lm	lm	lm	lm	lm	ll	lm	lm	lm	lm	lm	ll	ll	lm	lm	lm	ll	ll	ll	ll	ll	ll	ll	ll
Marker477771	lmxll	lm	ll	lm	ll	ll	lm	lm	lm	lm	lm	lm	ll	lm	ll	lm	ll	lm	ll	ll	lm	ll	lm	ll	lm	lm	lm	lm	lm	lm	ll	lm	lm	lm	lm	lm	ll	ll	lm	lm	lm	ll	ll	ll	ll	ll	ll	ll	ll
Marker154722	lmxll	ll	lm	ll	lm	lm	ll	ll	ll	ll	ll	ll	lm	ll	lm	ll	lm	ll	lm	lm	ll	lm	ll	lm	ll	ll	ll	ll	ll	ll	lm	ll	ll	ll	ll	ll	lm	lm	ll	ll	ll	lm	lm	lm	lm	lm	lm	lm	lm
Marker293791	lmxll	lm	ll	ll	ll	ll	lm	lm	lm	lm	lm	lm	ll	lm	ll	lm	ll	lm	ll	ll	lm	ll	lm	ll	lm	lm	lm	lm	lm	lm	ll	lm	lm	lm	lm	lm	ll	ll	lm	lm	lm	ll	ll	ll	ll	ll	ll	ll	ll
Marker352442	hkxhk	hh	hk	hk	kk	kk	hh	hk	hh	hh	hk	hh	kk	hh	kk	hk	hk	hh	hk	hk	hh	kk	hh	kk	hh	hh	hk	hh	hh	hh	kk	hk	hh	hh	hh	hk	kk	kk	hh	hk	hh	kk	kk	kk	hk	hk	kk	hk	kk
Marker240729	nnxnp	nn	nn	np	np	np	nn	np	nn	nn	np	nn	np	nn	np	np	nn	nn	nn	nn	nn	np	nn	np	nn	nn	np	nn	nn	nn	np	np	nn	nn	nn	np	np	np	nn	np	nn	np	np	np	nn	nn	np	nn	np
Marker58349	nnxnp	nn	nn	np	np	np	nn	np	nn	nn	np	nn	np	nn	np	np	nn	nn	nn	nn	nn	np	nn	np	nn	nn	np	nn	nn	nn	np	np	nn	nn	nn	np	np	np	nn	np	nn	np	np	np	nn	nn	np	nn	np
Marker275998	nnxnp	nn	nn	np	np	np	nn	np	nn	nn	np	nn	np	nn	np	np	nn	nn	nn	nn	nn	np	nn	np	nn	nn	np	nn	nn	nn	np	np	nn	nn	nn	np	np	np	nn	np	nn	np	np	np	nn	nn	np	nn	np
Marker133075	nnxnp	np	np	nn	nn	nn	np	nn	np	np	nn	np	nn	np	nn	nn	np	np	np	np	np	nn	np	nn	np	np	nn	np	np	np	nn	nn	np	np	np	nn	nn	nn	np	nn	np	nn	nn	nn	np	np	nn	np	nn
Marker484951	lmxll	ll	lm	ll	lm	lm	ll	ll	ll	ll	ll	ll	lm	ll	lm	ll	lm	ll	lm	lm	ll	lm	ll	lm	ll	ll	ll	ll	ll	ll	lm	ll	ll	ll	ll	ll	lm	lm	ll	ll	ll	lm	lm	lm	lm	lm	lm	lm	lm
Marker117336	lmxll	lm	ll	lm	ll	ll	lm	lm	lm	lm	lm	lm	ll	lm	ll	lm	ll	lm	ll	ll	lm	ll	lm	ll	lm	lm	lm	lm	lm	lm	ll	lm	lm	lm	lm	lm	ll	ll	lm	lm	lm	ll	ll	ll	ll	ll	ll	ll	ll
Marker363225	lmxll	lm	ll	lm	ll	ll	lm	lm	lm	lm	lm	lm	ll	lm	ll	lm	ll	lm	ll	ll	lm	ll	lm	ll	lm	lm	lm	lm	lm	lm	ll	lm	lm	lm	lm	lm	ll	ll	lm	lm	lm	ll	ll	ll	ll	ll	ll	ll	ll
Marker142522	lmxll	ll	lm	ll	lm	lm	ll	ll	ll	ll	ll	ll	lm	ll	lm	ll	lm	ll	lm	lm	ll	lm	ll	lm	ll	ll	ll	ll	ll	ll	lm	ll	ll	ll	ll	ll	lm	lm	ll	ll	ll	lm	lm	lm	lm	lm	lm	lm	lm
Marker385865	lmxll	ll	lm	ll	lm	lm	ll	ll	ll	ll	ll	ll	lm	ll	lm	ll	lm	ll	lm	lm	ll	lm	ll	lm	ll	ll	ll	ll	ll	ll	lm	ll	ll	ll	ll	ll	lm	lm	ll	ll	ll	lm	lm	lm	lm	lm	lm	lm	lm
Marker323686	lmxll	ll	lm	ll	ll	lm	ll	ll	ll	ll	ll	ll	lm	ll	lm	ll	lm	ll	lm	lm	ll	lm	ll	lm	ll	ll	ll	ll	ll	ll	lm	ll	ll	ll	ll	ll	lm	lm	ll	ll	ll	lm	lm	lm	lm	lm	lm	lm	lm
Marker148495	lmxll	ll	lm	ll	ll	lm	ll	ll	ll	ll	ll	ll	lm	ll	lm	ll	lm	ll	lm	lm	ll	lm	ll	lm	ll	ll	ll	ll	ll	ll	lm	ll	ll	ll	ll	ll	lm	lm	ll	ll	ll	lm	lm	lm	lm	lm	lm	lm	lm
Marker47136	lmxll	ll	lm	ll	ll	lm	ll	ll	ll	ll	ll	ll	lm	ll	lm	ll	lm	ll	lm	lm	ll	lm	ll	lm	ll	ll	ll	ll	ll	ll	lm	ll	ll	ll	ll	ll	lm	lm	ll	ll	ll	lm	lm	lm	lm	lm	lm	lm	lm
Marker462832	lmxll	ll	lm	ll	ll	lm	ll	ll	ll	ll	ll	ll	lm	ll	lm	ll	lm	ll	lm	lm	ll	lm	ll	lm	ll	ll	ll	ll	ll	ll	lm	ll	ll	ll	ll	ll	lm	lm	ll	ll	ll	lm	lm	lm	lm	lm	lm	lm	lm
Marker218601	lmxll	lm	ll	lm	lm	ll	lm	lm	lm	lm	lm	lm	ll	lm	ll	lm	ll	lm	ll	ll	lm	lm	lm	ll	lm	lm	lm	lm	lm	lm	ll	lm	lm	lm	lm	lm	ll	ll	lm	lm	lm	ll	ll	ll	ll	ll	ll	ll	ll
Marker348802	lmxll	lm	ll	lm	lm	ll	lm	lm	lm	lm	lm	lm	ll	lm	ll	lm	ll	lm	ll	ll	lm	lm	lm	ll	lm	lm	lm	lm	lm	lm	ll	lm	lm	lm	lm	lm	ll	ll	lm	lm	lm	ll	ll	ll	ll	ll	ll	ll	ll
Marker318135	lmxll	lm	ll	lm	lm	ll	lm	lm	lm	lm	lm	lm	ll	lm	ll	lm	ll	lm	ll	ll	lm	lm	lm	ll	lm	lm	lm	lm	lm	lm	ll	lm	lm	lm	lm	lm	ll	ll	lm	lm	lm	ll	ll	ll	ll	ll	ll	ll	ll
Marker582017	lmxll	lm	lm	lm	lm	ll	lm	lm	lm	lm	lm	lm	ll	lm	ll	lm	ll	lm	ll	ll	lm	lm	lm	ll	lm	lm	lm	lm	lm	lm	ll	lm	lm	lm	lm	lm	ll	ll	lm	lm	lm	ll	ll	ll	ll	ll	ll	ll	ll
Marker377575	lmxll	lm	lm	lm	lm	ll	lm	lm	lm	lm	lm	lm	ll	lm	ll	lm	ll	lm	ll	ll	lm	lm	lm	ll	lm	lm	lm	lm	lm	lm	ll	lm	lm	lm	lm	lm	ll	ll	lm	lm	lm	ll	ll	ll	ll	ll	ll	ll	ll
Marker41937	lmxll	lm	lm	lm	lm	ll	lm	lm	lm	lm	lm	lm	ll	lm	ll	lm	ll	lm	ll	ll	lm	lm	lm	ll	lm	lm	lm	lm	lm	lm	ll	lm	lm	lm	lm	lm	ll	ll	lm	lm	lm	ll	ll	ll	ll	ll	ll	ll	ll
Marker545300	lmxll	lm	lm	lm	lm	ll	lm	lm	lm	lm	lm	lm	ll	lm	ll	lm	ll	lm	ll	ll	lm	lm	lm	ll	lm	lm	lm	lm	lm	lm	ll	lm	lm	lm	lm	lm	ll	ll	lm	lm	lm	ll	ll	ll	ll	ll	ll	ll	ll
Marker162318	lmxll	ll	ll	ll	ll	lm	ll	ll	ll	ll	ll	ll	lm	ll	lm	ll	lm	ll	lm	lm	ll	ll	ll	lm	ll	ll	ll	ll	ll	ll	lm	ll	ll	ll	ll	ll	lm	lm	ll	ll	ll	lm	lm	lm	lm	lm	lm	lm	lm
Marker360166	lmxll	ll	ll	ll	ll	lm	ll	ll	ll	ll	ll	ll	lm	ll	lm	ll	lm	ll	lm	lm	ll	ll	ll	lm	ll	ll	ll	ll	ll	ll	lm	ll	ll	ll	ll	ll	lm	lm	ll	ll	ll	lm	lm	lm	lm	lm	lm	lm	lm
Marker228639	lmxll	lm	lm	lm	lm	ll	lm	lm	lm	lm	lm	lm	ll	lm	ll	lm	ll	lm	ll	ll	lm	lm	lm	ll	lm	lm	lm	lm	lm	lm	ll	lm	lm	lm	lm	lm	ll	ll	lm	lm	lm	ll	ll	ll	ll	ll	ll	ll	ll
Marker492733	lmxll	lm	lm	lm	lm	ll	lm	lm	lm	lm	lm	lm	ll	lm	ll	lm	ll	lm	ll	ll	lm	lm	lm	ll	lm	lm	lm	lm	lm	lm	ll	lm	lm	lm	lm	lm	ll	ll	lm	lm	lm	ll	ll	ll	ll	ll	ll	ll	ll
Marker425652	lmxll	lm	lm	lm	lm	ll	lm	lm	lm	lm	lm	lm	ll	lm	ll	lm	ll	lm	ll	ll	lm	lm	lm	ll	lm	lm	lm	lm	lm	lm	ll	lm	lm	lm	lm	lm	ll	ll	lm	lm	lm	ll	ll	ll	ll	ll	ll	ll	ll
Marker184590	lmxll	lm	lm	lm	lm	ll	lm	lm	lm	lm	lm	lm	ll	lm	ll	lm	ll	lm	ll	ll	lm	lm	lm	ll	lm	lm	lm	lm	lm	lm	ll	lm	lm	lm	lm	lm	ll	ll	lm	lm	lm	ll	ll	ll	ll	ll	ll	ll	ll
Marker388816	lmxll	lm	lm	lm	lm	ll	lm	lm	lm	lm	lm	lm	ll	lm	ll	lm	ll	lm	ll	ll	ll	lm	lm	ll	lm	lm	lm	lm	lm	lm	ll	lm	lm	lm	lm	lm	ll	ll	lm	lm	lm	ll	ll	ll	ll	ll	ll	ll	ll
Marker440311	lmxll	ll	ll	ll	ll	lm	ll	ll	ll	ll	ll	ll	lm	ll	lm	ll	lm	ll	lm	lm	lm	ll	ll	lm	ll	ll	ll	ll	ll	ll	lm	ll	ll	ll	ll	ll	lm	lm	ll	ll	ll	lm	lm	lm	lm	lm	lm	lm	lm
Marker435722	lmxll	lm	lm	lm	lm	ll	lm	lm	lm	lm	lm	lm	ll	lm	ll	lm	ll	lm	ll	ll	ll	lm	lm	ll	lm	lm	lm	lm	lm	lm	ll	lm	lm	lm	lm	lm	ll	ll	lm	lm	lm	ll	ll	ll	ll	ll	ll	ll	ll
Marker102186	lmxll	ll	ll	ll	ll	lm	ll	ll	ll	ll	ll	ll	lm	ll	lm	ll	lm	ll	lm	lm	lm	ll	ll	lm	ll	ll	ll	ll	ll	ll	lm	ll	ll	ll	ll	ll	lm	lm	ll	ll	ll	lm	lm	lm	lm	lm	lm	lm	lm
Marker420572	lmxll	lm	lm	lm	lm	ll	lm	lm	lm	lm	lm	lm	ll	lm	ll	lm	ll	lm	ll	ll	ll	lm	lm	ll	lm	lm	lm	lm	lm	lm	ll	lm	lm	lm	lm	lm	ll	ll	lm	lm	lm	ll	ll	ll	ll	ll	ll	ll	ll
Marker361588	lmxll	lm	lm	lm	lm	ll	lm	lm	lm	lm	lm	lm	ll	lm	ll	lm	ll	lm	ll	ll	ll	lm	lm	ll	lm	lm	lm	lm	lm	lm	ll	lm	lm	lm	lm	lm	ll	ll	lm	lm	lm	ll	ll	ll	ll	ll	ll	ll	ll
Marker138966	lmxll	ll	ll	ll	ll	lm	ll	ll	ll	ll	ll	ll	lm	ll	lm	ll	lm	ll	lm	lm	lm	ll	ll	lm	ll	ll	ll	ll	ll	ll	lm	ll	ll	ll	ll	ll	lm	lm	ll	ll	ll	lm	lm	lm	lm	lm	lm	lm	lm
Marker260521	lmxll	lm	lm	lm	lm	ll	lm	lm	lm	lm	lm	lm	ll	lm	ll	lm	ll	lm	ll	ll	ll	lm	lm	ll	lm	lm	lm	lm	lm	lm	ll	lm	lm	lm	lm	lm	ll	ll	lm	lm	lm	ll	ll	ll	ll	ll	ll	ll	ll
Marker534026	lmxll	lm	lm	lm	lm	ll	lm	lm	lm	lm	lm	ll	ll	lm	ll	lm	ll	lm	ll	ll	ll	lm	lm	ll	lm	lm	lm	lm	lm	lm	ll	lm	lm	lm	lm	lm	ll	ll	lm	lm	lm	ll	ll	ll	ll	ll	ll	ll	ll
Marker265068	lmxll	ll	ll	ll	ll	lm	ll	ll	ll	ll	ll	lm	lm	ll	lm	ll	lm	ll	lm	lm	lm	ll	ll	lm	ll	ll	ll	ll	ll	ll	lm	ll	ll	ll	ll	ll	lm	lm	ll	ll	ll	lm	lm	lm	lm	lm	lm	lm	lm
Marker235698	lmxll	ll	ll	ll	ll	lm	ll	ll	ll	ll	ll	lm	lm	ll	lm	ll	lm	ll	lm	lm	lm	ll	ll	lm	ll	ll	ll	ll	ll	ll	lm	ll	ll	ll	ll	ll	lm	lm	ll	ll	ll	lm	lm	lm	lm	lm	lm	lm	lm
Marker326597	lmxll	ll	ll	ll	ll	lm	ll	ll	ll	ll	ll	lm	lm	ll	lm	ll	lm	ll	lm	lm	lm	ll	ll	lm	ll	ll	ll	ll	ll	ll	lm	ll	ll	ll	ll	ll	lm	lm	ll	ll	ll	lm	lm	lm	lm	lm	lm	lm	lm
Marker221091	lmxll	ll	ll	ll	ll	lm	ll	ll	ll	ll	ll	lm	lm	ll	lm	ll	lm	ll	lm	lm	lm	ll	ll	lm	ll	ll	ll	ll	ll	ll	lm	ll	ll	ll	ll	ll	lm	lm	ll	ll	ll	lm	lm	lm	lm	lm	lm	lm	lm
Marker382659	lmxll	ll	ll	ll	ll	lm	ll	ll	ll	ll	ll	lm	lm	ll	lm	ll	lm	ll	lm	lm	lm	ll	ll	lm	ll	ll	ll	ll	ll	ll	lm	ll	ll	ll	ll	ll	lm	lm	ll	ll	ll	lm	lm	lm	lm	lm	lm	lm	lm
Marker284033	lmxll	lm	lm	lm	lm	ll	lm	lm	lm	lm	lm	ll	ll	lm	ll	lm	ll	lm	ll	ll	ll	lm	lm	ll	lm	lm	lm	lm	lm	lm	ll	lm	lm	lm	lm	lm	ll	ll	lm	lm	lm	ll	ll	ll	ll	ll	ll	ll	ll
Marker242301	lmxll	ll	ll	ll	ll	lm	ll	ll	ll	ll	ll	lm	lm	ll	lm	ll	lm	ll	lm	lm	lm	ll	ll	lm	ll	ll	ll	ll	ll	ll	ll	ll	ll	ll	ll	ll	lm	lm	ll	ll	ll	lm	lm	lm	lm	lm	lm	lm	lm
Marker27428	lmxll	ll	ll	ll	ll	lm	ll	ll	ll	ll	ll	lm	lm	ll	lm	ll	lm	ll	lm	lm	lm	ll	ll	lm	ll	ll	ll	ll	ll	ll	ll	ll	ll	ll	ll	ll	lm	lm	ll	ll	ll	lm	lm	lm	lm	lm	lm	lm	lm
Marker260979	lmxll	lm	lm	lm	lm	ll	lm	lm	lm	lm	lm	ll	ll	lm	ll	lm	ll	lm	ll	ll	ll	lm	lm	ll	lm	lm	lm	lm	lm	lm	lm	lm	lm	lm	lm	lm	ll	ll	lm	lm	lm	ll	ll	ll	ll	ll	ll	ll	ll
Marker163671	lmxll	lm	lm	lm	lm	ll	lm	lm	lm	lm	lm	ll	ll	lm	ll	lm	ll	lm	ll	ll	ll	lm	lm	ll	lm	lm	lm	lm	lm	lm	lm	lm	lm	lm	lm	lm	ll	ll	lm	lm	lm	ll	ll	ll	ll	ll	ll	ll	ll
Marker306327	lmxll	ll	ll	ll	ll	lm	ll	ll	ll	ll	ll	lm	lm	ll	lm	ll	lm	ll	lm	lm	lm	ll	ll	lm	ll	ll	ll	ll	ll	ll	ll	ll	ll	ll	ll	ll	lm	lm	ll	ll	ll	lm	lm	lm	lm	lm	lm	lm	lm
Marker243574	lmxll	lm	lm	lm	lm	ll	lm	lm	lm	lm	lm	ll	ll	lm	ll	lm	ll	lm	ll	ll	ll	lm	lm	ll	lm	lm	lm	lm	lm	lm	lm	lm	lm	lm	lm	lm	ll	ll	lm	lm	lm	ll	ll	ll	ll	ll	ll	ll	ll
Marker151547	lmxll	lm	lm	lm	lm	ll	lm	lm	lm	lm	lm	ll	ll	lm	ll	lm	ll	lm	ll	ll	ll	lm	lm	ll	lm	lm	lm	lm	lm	lm	lm	lm	lm	lm	lm	lm	ll	ll	lm	lm	lm	ll	ll	ll	ll	ll	ll	ll	ll
Marker344397	lmxll	lm	lm	lm	lm	ll	lm	lm	lm	lm	lm	ll	ll	lm	ll	lm	ll	lm	ll	ll	ll	lm	lm	ll	lm	lm	lm	lm	lm	lm	lm	lm	lm	lm	lm	lm	ll	ll	lm	lm	lm	ll	ll	ll	ll	ll	ll	ll	ll
Marker337887	lmxll	lm	lm	lm	lm	ll	lm	lm	lm	lm	lm	ll	ll	lm	ll	lm	ll	lm	ll	ll	ll	lm	lm	ll	lm	lm	lm	lm	lm	lm	lm	lm	lm	lm	lm	lm	ll	lm	lm	lm	lm	ll	ll	ll	ll	ll	ll	ll	ll
Marker47337	lmxll	ll	ll	ll	ll	lm	ll	ll	ll	ll	ll	lm	lm	ll	lm	ll	lm	ll	lm	lm	lm	ll	ll	lm	ll	ll	ll	ll	ll	ll	ll	ll	ll	ll	ll	ll	lm	ll	ll	ll	ll	lm	lm	lm	lm	lm	lm	lm	lm
Marker122080	lmxll	lm	lm	lm	lm	ll	lm	lm	lm	lm	lm	ll	ll	lm	ll	lm	ll	lm	ll	ll	ll	lm	lm	ll	lm	lm	lm	lm	lm	lm	lm	lm	lm	lm	lm	lm	ll	lm	lm	lm	lm	ll	ll	ll	ll	ll	ll	ll	ll
Marker224010	lmxll	lm	lm	lm	lm	ll	lm	lm	lm	lm	lm	ll	ll	lm	ll	lm	ll	lm	ll	ll	ll	lm	lm	ll	lm	lm	lm	lm	lm	lm	lm	lm	lm	lm	lm	lm	ll	lm	lm	lm	lm	ll	ll	ll	ll	ll	ll	ll	ll
Marker274838	lmxll	lm	lm	lm	lm	ll	lm	lm	lm	lm	lm	ll	ll	lm	ll	lm	ll	lm	ll	ll	ll	lm	lm	ll	lm	lm	lm	lm	lm	lm	lm	lm	lm	lm	lm	lm	ll	lm	lm	lm	lm	ll	ll	ll	ll	ll	ll	ll	ll
Marker73209	lmxll	lm	lm	lm	lm	ll	lm	lm	lm	lm	lm	ll	ll	lm	ll	lm	ll	lm	ll	ll	ll	lm	lm	ll	lm	lm	lm	lm	lm	lm	lm	lm	lm	lm	lm	lm	ll	ll	lm	lm	lm	ll	ll	ll	ll	ll	ll	ll	ll
Marker670165	lmxll	ll	ll	ll	ll	lm	ll	ll	ll	ll	ll	lm	lm	ll	lm	ll	lm	ll	lm	lm	lm	ll	ll	lm	ll	ll	ll	ll	ll	ll	ll	ll	ll	ll	ll	ll	lm	lm	ll	ll	ll	lm	lm	lm	lm	lm	lm	lm	lm
Marker265678	lmxll	lm	lm	lm	lm	ll	lm	lm	lm	lm	lm	ll	ll	lm	ll	lm	ll	lm	ll	ll	ll	lm	lm	ll	lm	lm	lm	lm	lm	lm	lm	lm	lm	lm	lm	lm	ll	ll	lm	lm	lm	ll	ll	ll	ll	ll	ll	ll	ll
Marker447788	lmxll	lm	lm	lm	lm	ll	lm	lm	lm	lm	lm	ll	ll	lm	ll	lm	ll	lm	ll	ll	ll	lm	lm	ll	lm	lm	lm	lm	lm	lm	lm	lm	lm	lm	lm	lm	ll	ll	lm	lm	lm	ll	ll	ll	ll	ll	ll	ll	ll
Marker368521	lmxll	lm	lm	lm	lm	ll	lm	lm	lm	lm	lm	ll	ll	lm	ll	lm	ll	lm	ll	ll	ll	lm	lm	ll	lm	lm	lm	lm	lm	lm	lm	lm	lm	lm	lm	lm	ll	ll	lm	lm	lm	ll	ll	ll	ll	ll	ll	ll	ll
Marker237852	lmxll	ll	ll	ll	ll	lm	ll	ll	ll	ll	ll	lm	lm	ll	lm	ll	lm	ll	lm	lm	lm	ll	ll	lm	ll	ll	ll	ll	ll	ll	ll	ll	ll	ll	ll	ll	lm	lm	ll	ll	ll	lm	lm	lm	lm	lm	lm	lm	lm
Marker117216	lmxll	lm	lm	lm	lm	ll	lm	lm	lm	lm	lm	ll	ll	lm	ll	lm	ll	lm	ll	ll	ll	lm	lm	ll	lm	lm	lm	lm	lm	lm	lm	lm	lm	lm	lm	lm	ll	ll	lm	lm	lm	ll	ll	ll	ll	ll	ll	ll	ll
Marker303775	lmxll	ll	ll	ll	ll	lm	ll	ll	ll	ll	ll	lm	lm	ll	lm	ll	lm	ll	lm	lm	lm	ll	ll	lm	ll	ll	ll	ll	ll	ll	ll	ll	ll	ll	ll	ll	lm	ll	ll	ll	ll	lm	lm	lm	lm	lm	lm	lm	lm
Marker195889	lmxll	ll	ll	ll	ll	lm	ll	ll	ll	ll	ll	lm	lm	ll	lm	ll	lm	ll	lm	lm	lm	ll	ll	lm	ll	ll	ll	ll	ll	ll	ll	ll	ll	ll	ll	ll	lm	ll	ll	ll	ll	lm	lm	lm	lm	lm	lm	lm	lm
Marker124719	lmxll	lm	lm	lm	lm	ll	lm	lm	lm	lm	lm	ll	ll	lm	ll	lm	ll	lm	ll	ll	ll	lm	lm	ll	lm	lm	lm	lm	lm	lm	lm	lm	lm	lm	lm	lm	ll	lm	lm	lm	lm	ll	ll	ll	ll	ll	ll	ll	ll
Marker278973	lmxll	lm	lm	lm	lm	ll	lm	lm	lm	lm	lm	ll	ll	lm	ll	lm	ll	lm	ll	ll	ll	lm	lm	ll	lm	lm	lm	lm	lm	lm	lm	lm	lm	lm	lm	lm	ll	lm	lm	lm	lm	ll	ll	ll	ll	ll	ll	ll	ll
Marker153705	lmxll	ll	ll	ll	ll	lm	ll	ll	ll	ll	ll	lm	lm	ll	lm	ll	lm	ll	lm	lm	lm	ll	ll	lm	ll	ll	ll	ll	ll	ll	ll	ll	ll	ll	ll	ll	lm	ll	ll	ll	ll	lm	lm	lm	lm	lm	lm	lm	lm
Marker486247	lmxll	lm	lm	lm	lm	ll	lm	lm	lm	lm	lm	ll	ll	lm	ll	lm	ll	lm	ll	ll	ll	lm	lm	ll	lm	lm	lm	lm	lm	lm	lm	lm	lm	lm	lm	lm	ll	lm	lm	lm	lm	ll	ll	ll	ll	ll	ll	ll	ll
Marker161253	lmxll	lm	lm	lm	lm	ll	lm	lm	lm	lm	lm	ll	ll	lm	ll	lm	ll	lm	ll	ll	ll	lm	lm	ll	lm	lm	lm	lm	lm	lm	lm	lm	lm	lm	lm	lm	ll	lm	lm	lm	lm	ll	ll	ll	ll	ll	ll	ll	ll
Marker291565	lmxll	ll	ll	ll	ll	lm	ll	ll	ll	ll	ll	lm	lm	ll	lm	ll	lm	ll	lm	lm	lm	ll	ll	lm	ll	ll	ll	ll	ll	ll	ll	ll	ll	ll	ll	ll	lm	ll	ll	ll	ll	lm	lm	lm	lm	lm	lm	lm	lm
Marker232932	lmxll	ll	ll	ll	ll	lm	ll	ll	ll	ll	ll	lm	lm	ll	lm	ll	lm	ll	lm	lm	lm	ll	ll	lm	ll	ll	ll	ll	ll	ll	ll	ll	ll	ll	ll	ll	lm	ll	ll	ll	ll	lm	lm	lm	lm	lm	lm	lm	lm
Marker61740	lmxll	ll	ll	ll	ll	lm	ll	ll	ll	ll	ll	lm	lm	ll	lm	ll	lm	ll	lm	lm	lm	ll	ll	lm	ll	ll	ll	ll	ll	ll	ll	ll	ll	ll	ll	ll	lm	ll	ll	ll	ll	lm	lm	lm	lm	lm	lm	lm	lm
Marker271338	lmxll	lm	lm	lm	lm	ll	lm	lm	lm	lm	lm	ll	ll	lm	ll	lm	ll	lm	ll	ll	ll	lm	lm	ll	lm	lm	lm	lm	lm	lm	lm	lm	lm	lm	lm	lm	ll	lm	lm	lm	lm	ll	ll	ll	ll	ll	ll	ll	ll
Marker321807	lmxll	ll	ll	ll	ll	lm	ll	ll	ll	ll	ll	lm	lm	ll	lm	ll	lm	ll	lm	lm	lm	ll	ll	lm	ll	ll	ll	ll	ll	ll	ll	ll	ll	ll	ll	ll	lm	ll	ll	ll	ll	lm	lm	lm	lm	lm	lm	lm	lm
Marker175937	lmxll	ll	ll	ll	ll	lm	ll	ll	ll	ll	ll	lm	lm	ll	lm	ll	lm	ll	lm	lm	lm	ll	ll	lm	ll	ll	ll	ll	ll	ll	ll	ll	ll	ll	ll	ll	lm	ll	ll	ll	ll	lm	lm	lm	lm	lm	lm	lm	lm
Marker186955	lmxll	lm	lm	lm	lm	ll	lm	lm	lm	lm	lm	ll	ll	lm	ll	lm	ll	lm	ll	ll	ll	lm	lm	ll	lm	lm	lm	lm	lm	lm	lm	lm	lm	lm	lm	lm	ll	lm	lm	lm	lm	ll	ll	ll	ll	ll	ll	ll	ll
Marker432693	lmxll	lm	lm	lm	lm	ll	lm	lm	lm	lm	lm	ll	ll	lm	ll	lm	ll	lm	ll	ll	ll	lm	lm	ll	lm	lm	lm	lm	lm	lm	lm	lm	lm	lm	lm	lm	ll	lm	lm	lm	lm	ll	ll	ll	ll	ll	ll	ll	ll
Marker484877	lmxll	ll	ll	ll	ll	lm	ll	ll	ll	ll	ll	lm	lm	ll	lm	ll	lm	ll	lm	lm	lm	ll	ll	lm	ll	ll	ll	ll	ll	ll	ll	ll	ll	ll	ll	ll	lm	ll	ll	ll	ll	lm	lm	lm	lm	lm	lm	lm	lm
Marker128890	lmxll	lm	lm	lm	lm	ll	lm	lm	lm	lm	lm	ll	ll	lm	ll	lm	ll	lm	ll	ll	ll	lm	lm	ll	lm	lm	lm	lm	lm	lm	lm	lm	lm	lm	lm	lm	ll	lm	lm	lm	lm	ll	ll	ll	ll	ll	ll	ll	ll
Marker143841	lmxll	lm	lm	lm	lm	ll	lm	lm	lm	lm	lm	ll	ll	lm	ll	lm	ll	lm	ll	ll	ll	lm	lm	ll	lm	lm	lm	lm	lm	lm	lm	lm	lm	lm	lm	lm	ll	lm	lm	lm	lm	ll	ll	ll	ll	ll	ll	ll	ll
Marker127239	lmxll	lm	lm	lm	lm	ll	lm	lm	lm	lm	lm	ll	ll	lm	ll	lm	ll	lm	ll	ll	ll	lm	lm	ll	lm	lm	lm	lm	lm	lm	lm	lm	lm	lm	lm	lm	ll	lm	lm	lm	lm	ll	ll	ll	ll	ll	ll	ll	ll
Marker182179	lmxll	lm	lm	lm	lm	ll	lm	lm	lm	lm	lm	ll	ll	lm	ll	lm	ll	lm	ll	ll	ll	lm	lm	ll	lm	lm	lm	lm	lm	lm	lm	lm	lm	lm	lm	lm	ll	lm	lm	lm	lm	ll	ll	ll	ll	ll	ll	ll	ll
Marker752066	nnxnp	nn	np	nn	nn	nn	nn	nn	nn	nn	nn	np	nn	np	np	nn	np	nn	np	np	nn	nn	nn	nn	nn	np	nn	np	np	np	nn	np	nn	np	np	nn	nn	nn	nn	nn	np	nn	np	nn	nn	np	nn	nn	nn
Marker141256	lmxll	ll	ll	ll	ll	lm	ll	ll	ll	ll	ll	lm	lm	ll	lm	ll	lm	ll	lm	lm	lm	ll	ll	lm	lm	ll	ll	ll	ll	ll	ll	ll	ll	ll	ll	ll	lm	ll	ll	ll	ll	lm	lm	lm	lm	lm	lm	lm	lm
Marker50902	lmxll	lm	lm	lm	lm	ll	lm	lm	lm	lm	lm	ll	ll	lm	ll	lm	ll	lm	ll	ll	ll	lm	lm	ll	ll	lm	lm	lm	lm	lm	lm	lm	lm	lm	lm	lm	ll	lm	lm	lm	lm	ll	ll	ll	ll	ll	ll	ll	ll
Marker314117	hkxhk	hk	kk	hk	hk	hh	hk	hk	hk	hk	hk	hk	hh	kk	hk	hk	hk	hk	hk	hk	hh	hk	hk	hh	hh	kk	hk	hk	kk	kk	hk	kk	hk	kk	kk	hk	hh	hk	hk	hk	hk	hh	hk	hh	hh	hk	hh	hh	hh
Marker348148	lmxll	lm	lm	lm	lm	ll	lm	lm	lm	lm	lm	ll	ll	lm	ll	lm	ll	lm	ll	ll	ll	lm	lm	ll	ll	lm	lm	lm	lm	lm	lm	lm	lm	lm	lm	lm	ll	lm	lm	lm	lm	ll	ll	ll	ll	ll	ll	ll	ll
Marker416660	lmxll	lm	lm	lm	lm	ll	lm	lm	lm	lm	lm	ll	ll	lm	ll	lm	ll	lm	ll	ll	ll	lm	lm	ll	ll	lm	lm	lm	lm	lm	lm	lm	lm	lm	lm	lm	ll	lm	lm	lm	lm	ll	ll	ll	ll	ll	ll	ll	ll
Marker166697	lmxll	ll	ll	ll	ll	lm	ll	ll	ll	ll	ll	lm	lm	ll	lm	ll	lm	ll	lm	lm	lm	ll	ll	lm	lm	ll	ll	ll	ll	ll	ll	ll	ll	ll	ll	ll	lm	ll	ll	ll	ll	lm	lm	lm	lm	lm	lm	lm	lm
Marker378767	lmxll	lm	lm	lm	lm	ll	lm	lm	lm	lm	lm	ll	ll	lm	ll	lm	ll	lm	ll	ll	ll	lm	lm	ll	ll	lm	lm	lm	lm	lm	lm	lm	lm	lm	lm	lm	ll	lm	lm	lm	lm	ll	ll	ll	ll	ll	ll	ll	ll
Marker64736	lmxll	ll	ll	ll	ll	lm	ll	ll	ll	ll	ll	lm	lm	ll	lm	ll	lm	ll	lm	lm	lm	ll	ll	lm	lm	ll	ll	ll	ll	ll	ll	ll	ll	ll	ll	ll	lm	ll	ll	ll	ll	lm	lm	lm	lm	lm	lm	lm	lm
Marker771998	lmxll	lm	lm	lm	lm	ll	lm	lm	lm	lm	lm	ll	ll	lm	ll	lm	ll	lm	ll	ll	ll	lm	lm	ll	ll	lm	lm	lm	lm	lm	lm	lm	lm	lm	lm	lm	ll	lm	lm	lm	lm	ll	ll	ll	ll	ll	ll	ll	ll
Marker217432	lmxll	lm	lm	lm	lm	ll	lm	lm	lm	lm	lm	ll	ll	lm	ll	lm	ll	lm	ll	ll	ll	lm	lm	ll	ll	lm	lm	lm	lm	lm	lm	lm	lm	lm	lm	lm	ll	lm	lm	lm	lm	ll	ll	ll	ll	ll	ll	ll	ll
Marker47952	lmxll	lm	lm	lm	lm	ll	lm	lm	lm	lm	lm	ll	ll	lm	ll	lm	ll	lm	ll	ll	ll	lm	lm	ll	ll	lm	lm	lm	lm	lm	lm	lm	lm	lm	lm	lm	ll	lm	lm	lm	lm	ll	ll	ll	ll	ll	ll	ll	ll
Marker536096	lmxll	lm	lm	lm	lm	ll	lm	lm	lm	lm	lm	ll	ll	lm	ll	lm	ll	lm	ll	ll	ll	lm	lm	ll	ll	lm	lm	lm	lm	lm	lm	lm	lm	lm	lm	lm	ll	lm	lm	lm	lm	ll	ll	ll	ll	ll	ll	ll	ll
Marker351776	lmxll	ll	ll	ll	ll	lm	ll	ll	ll	ll	ll	lm	lm	ll	lm	ll	lm	ll	lm	lm	lm	ll	ll	lm	ll	ll	ll	ll	ll	ll	ll	ll	ll	ll	ll	ll	lm	ll	ll	ll	ll	lm	lm	lm	lm	lm	lm	lm	lm
Marker409450	lmxll	lm	lm	lm	lm	ll	lm	lm	lm	lm	lm	ll	ll	lm	ll	lm	ll	lm	ll	ll	ll	lm	lm	ll	lm	lm	lm	lm	lm	lm	lm	lm	lm	lm	lm	lm	ll	lm	lm	lm	lm	ll	ll	ll	ll	ll	ll	ll	ll
Marker267086	lmxll	ll	ll	ll	ll	lm	ll	ll	ll	ll	ll	lm	lm	ll	lm	ll	lm	ll	lm	lm	lm	ll	ll	lm	ll	ll	ll	ll	ll	ll	ll	ll	ll	ll	ll	ll	lm	ll	ll	ll	ll	lm	lm	lm	lm	lm	lm	lm	lm
Marker360076	lmxll	lm	lm	lm	lm	ll	lm	lm	lm	lm	lm	ll	ll	lm	ll	lm	ll	lm	ll	ll	ll	lm	lm	ll	lm	lm	lm	lm	lm	lm	lm	lm	lm	lm	lm	lm	ll	lm	lm	lm	lm	ll	ll	ll	ll	ll	ll	ll	ll
Marker162622	nnxnp	np	nn	np	np	np	np	np	np	np	np	nn	np	nn	nn	nn	nn	np	nn	nn	np	np	np	np	np	nn	np	np	nn	nn	np	nn	np	nn	nn	np	np	np	np	np	nn	np	nn	np	np	np	np	np	np
Marker388480	lmxll	ll	ll	ll	ll	lm	ll	ll	ll	ll	ll	lm	lm	ll	lm	ll	lm	ll	lm	lm	lm	ll	ll	lm	lm	ll	lm	ll	ll	ll	ll	ll	ll	ll	ll	ll	lm	ll	ll	ll	ll	lm	lm	lm	lm	lm	lm	lm	lm
Marker225204	lmxll	ll	ll	ll	ll	lm	ll	ll	ll	ll	ll	lm	lm	ll	lm	ll	lm	ll	lm	lm	lm	ll	ll	lm	lm	ll	lm	ll	ll	ll	ll	ll	ll	ll	ll	ll	lm	ll	ll	ll	ll	lm	lm	lm	lm	lm	lm	lm	lm
Marker296718	lmxll	lm	lm	lm	lm	ll	lm	lm	lm	lm	lm	ll	ll	lm	ll	lm	ll	lm	ll	ll	ll	lm	lm	ll	ll	lm	ll	lm	lm	lm	lm	lm	lm	lm	lm	lm	ll	lm	lm	lm	lm	ll	ll	ll	ll	ll	ll	ll	ll
Marker213458	lmxll	ll	ll	ll	ll	lm	ll	ll	ll	ll	ll	lm	lm	ll	lm	ll	lm	ll	lm	lm	lm	ll	ll	lm	lm	ll	lm	ll	ll	ll	ll	ll	ll	ll	ll	ll	lm	ll	ll	ll	ll	lm	lm	lm	lm	lm	lm	lm	lm
Marker80597	lmxll	ll	ll	ll	ll	lm	ll	ll	ll	ll	ll	lm	lm	ll	lm	ll	lm	ll	lm	lm	lm	ll	ll	lm	lm	ll	lm	ll	ll	ll	ll	ll	ll	ll	ll	ll	lm	ll	ll	ll	ll	lm	lm	lm	lm	lm	lm	lm	lm
Marker201029	lmxll	ll	ll	ll	ll	lm	ll	ll	ll	ll	ll	lm	lm	ll	lm	ll	lm	ll	lm	lm	lm	ll	ll	lm	lm	ll	lm	ll	ll	ll	ll	ll	ll	ll	ll	ll	lm	ll	ll	ll	ll	lm	lm	lm	lm	lm	lm	lm	lm
Marker247460	lmxll	ll	ll	ll	ll	lm	ll	ll	ll	ll	ll	lm	lm	ll	lm	ll	lm	ll	lm	lm	lm	ll	ll	lm	lm	ll	lm	ll	ll	ll	ll	ll	ll	ll	ll	ll	lm	ll	ll	ll	ll	lm	lm	lm	lm	lm	lm	lm	lm
Marker295982	lmxll	ll	ll	ll	ll	lm	ll	ll	ll	ll	ll	lm	lm	ll	lm	ll	lm	ll	lm	lm	lm	ll	ll	lm	lm	ll	lm	ll	ll	ll	ll	ll	ll	ll	ll	ll	lm	ll	ll	ll	ll	lm	lm	lm	lm	lm	lm	lm	lm
Marker149472	lmxll	ll	ll	ll	ll	lm	ll	ll	ll	ll	ll	lm	lm	ll	lm	ll	lm	ll	lm	lm	lm	ll	ll	lm	lm	ll	lm	ll	ll	ll	ll	ll	ll	ll	ll	ll	lm	ll	ll	ll	ll	lm	lm	lm	lm	lm	lm	lm	lm
Marker255931	lmxll	ll	ll	ll	ll	lm	ll	ll	ll	ll	ll	lm	lm	ll	lm	ll	lm	ll	lm	lm	lm	ll	ll	lm	lm	ll	lm	ll	ll	ll	ll	ll	ll	ll	ll	ll	lm	ll	ll	ll	ll	lm	lm	lm	lm	lm	lm	lm	lm
Marker166568	lmxll	lm	lm	lm	lm	ll	lm	lm	lm	lm	lm	ll	ll	lm	ll	lm	ll	lm	ll	ll	ll	lm	lm	ll	ll	lm	ll	lm	lm	lm	lm	lm	lm	lm	lm	lm	ll	lm	lm	lm	lm	ll	ll	ll	ll	ll	ll	ll	ll
Marker277072	lmxll	ll	ll	ll	ll	lm	ll	ll	ll	ll	ll	lm	lm	ll	lm	ll	lm	ll	lm	lm	lm	ll	ll	lm	lm	ll	lm	ll	ll	ll	ll	ll	ll	ll	ll	ll	lm	ll	ll	ll	ll	lm	lm	lm	lm	lm	lm	lm	lm
Marker214922	lmxll	ll	ll	ll	ll	lm	ll	ll	ll	ll	ll	lm	lm	ll	lm	ll	lm	ll	lm	lm	lm	ll	ll	lm	lm	ll	lm	ll	ll	ll	ll	ll	ll	ll	ll	ll	lm	ll	ll	ll	ll	lm	lm	lm	lm	lm	lm	lm	lm
Marker49481	lmxll	lm	lm	lm	lm	ll	lm	lm	lm	lm	lm	ll	ll	lm	ll	lm	ll	lm	ll	ll	ll	lm	lm	ll	ll	lm	ll	lm	lm	lm	lm	lm	lm	lm	lm	lm	ll	lm	lm	lm	lm	ll	ll	ll	ll	ll	ll	ll	ll
Marker375717	lmxll	lm	lm	lm	lm	ll	lm	lm	lm	lm	lm	ll	ll	lm	ll	lm	ll	lm	ll	ll	ll	lm	lm	ll	ll	lm	ll	lm	lm	lm	lm	lm	lm	lm	lm	lm	ll	lm	lm	lm	lm	ll	ll	ll	ll	ll	ll	ll	ll
Marker149067	lmxll	ll	ll	ll	ll	lm	ll	ll	ll	ll	ll	lm	lm	ll	lm	ll	lm	ll	lm	lm	lm	ll	ll	lm	lm	ll	lm	ll	ll	ll	ll	ll	ll	ll	ll	ll	lm	ll	ll	ll	ll	lm	lm	lm	lm	lm	lm	lm	lm
Marker468581	lmxll	lm	lm	lm	lm	ll	lm	lm	lm	lm	lm	ll	ll	lm	ll	lm	ll	lm	ll	ll	ll	lm	lm	ll	ll	lm	ll	lm	lm	lm	lm	lm	lm	lm	lm	lm	ll	lm	lm	lm	lm	ll	ll	ll	ll	ll	ll	ll	ll
Marker268066	lmxll	lm	lm	lm	lm	ll	lm	lm	lm	lm	lm	ll	ll	lm	ll	lm	ll	lm	ll	ll	ll	lm	lm	ll	ll	lm	ll	lm	lm	lm	lm	lm	lm	lm	lm	lm	ll	lm	lm	lm	lm	ll	ll	ll	ll	ll	ll	ll	ll
Marker46344	lmxll	ll	ll	ll	ll	lm	ll	ll	ll	ll	ll	lm	lm	ll	lm	ll	lm	ll	lm	lm	lm	ll	ll	lm	lm	ll	lm	ll	ll	ll	ll	ll	ll	ll	ll	ll	lm	ll	ll	ll	ll	lm	lm	lm	lm	lm	lm	lm	lm
Marker259685	lmxll	ll	ll	ll	ll	lm	ll	ll	ll	ll	ll	lm	lm	ll	lm	ll	lm	ll	lm	lm	lm	ll	ll	lm	lm	ll	lm	ll	ll	ll	ll	ll	ll	ll	ll	ll	lm	ll	ll	ll	ll	lm	lm	lm	lm	lm	lm	lm	lm
Marker17853	lmxll	ll	ll	ll	ll	lm	lm	ll	ll	ll	ll	lm	lm	ll	lm	ll	lm	ll	lm	lm	lm	ll	ll	lm	lm	ll	lm	ll	ll	ll	ll	ll	ll	ll	ll	ll	lm	ll	ll	ll	ll	lm	lm	lm	lm	lm	lm	lm	lm
Marker197482	lmxll	ll	ll	ll	ll	lm	lm	ll	ll	ll	ll	lm	lm	ll	lm	ll	lm	ll	lm	lm	lm	ll	ll	lm	lm	ll	lm	ll	ll	ll	ll	ll	ll	ll	ll	ll	lm	ll	ll	ll	ll	lm	lm	lm	lm	lm	lm	lm	lm
Marker369136	nnxnp	np	nn	np	np	np	np	np	np	np	np	nn	np	nn	nn	np	nn	np	np	nn	np	np	np	np	np	nn	np	np	nn	nn	np	nn	np	nn	nn	np	np	nn	np	np	np	np	nn	np	np	nn	np	np	np
Marker111535	nnxnp	nn	np	nn	nn	nn	nn	nn	nn	nn	nn	np	nn	np	np	nn	np	nn	nn	np	nn	nn	nn	nn	nn	np	nn	nn	np	np	nn	np	nn	np	np	nn	nn	np	nn	nn	nn	nn	np	nn	nn	np	nn	nn	nn
Marker204328	lmxll	lm	lm	lm	lm	ll	ll	lm	lm	lm	lm	ll	ll	lm	ll	lm	ll	lm	ll	ll	ll	lm	lm	ll	ll	lm	ll	lm	lm	lm	lm	lm	lm	lm	lm	lm	ll	lm	lm	lm	lm	ll	ll	ll	ll	ll	ll	ll	ll
Marker343983	lmxll	lm	lm	lm	lm	ll	ll	lm	lm	lm	lm	ll	ll	lm	ll	lm	ll	lm	ll	ll	ll	lm	lm	ll	ll	lm	ll	lm	lm	lm	lm	lm	lm	lm	lm	lm	ll	lm	lm	lm	lm	ll	ll	ll	ll	ll	ll	ll	ll
Marker119016	lmxll	lm	lm	lm	lm	ll	ll	lm	lm	lm	lm	ll	ll	lm	ll	lm	ll	lm	ll	ll	ll	lm	lm	ll	ll	lm	ll	lm	lm	lm	lm	lm	lm	lm	lm	lm	ll	lm	lm	lm	lm	ll	ll	ll	ll	ll	ll	ll	ll
Marker370321	lmxll	ll	ll	ll	ll	lm	lm	ll	ll	ll	ll	lm	lm	ll	lm	ll	lm	ll	lm	lm	lm	ll	ll	lm	lm	ll	lm	ll	ll	ll	ll	ll	ll	ll	ll	ll	lm	ll	ll	ll	ll	lm	lm	lm	lm	lm	lm	lm	lm
Marker121843	lmxll	ll	ll	ll	ll	lm	lm	ll	ll	ll	ll	lm	lm	ll	lm	ll	lm	ll	lm	lm	lm	ll	ll	lm	lm	ll	lm	ll	ll	ll	ll	ll	ll	ll	ll	ll	lm	ll	ll	ll	ll	lm	lm	lm	lm	lm	lm	lm	lm
Marker216795	lmxll	lm	lm	lm	lm	ll	ll	lm	lm	lm	lm	ll	ll	lm	ll	lm	ll	lm	ll	ll	ll	lm	lm	ll	ll	lm	ll	lm	lm	lm	lm	lm	lm	lm	lm	lm	ll	lm	lm	lm	lm	ll	ll	ll	ll	ll	ll	ll	ll
Marker92047	lmxll	ll	ll	ll	ll	lm	lm	ll	ll	ll	ll	lm	lm	ll	lm	ll	lm	ll	lm	lm	lm	ll	ll	lm	lm	ll	lm	ll	ll	ll	ll	ll	ll	ll	ll	ll	lm	ll	ll	ll	ll	lm	lm	lm	lm	lm	lm	lm	lm
Marker634474	lmxll	ll	ll	ll	ll	lm	lm	ll	ll	ll	ll	lm	lm	ll	lm	ll	lm	ll	lm	lm	lm	ll	ll	lm	lm	ll	lm	ll	ll	ll	ll	ll	ll	ll	ll	ll	lm	ll	ll	ll	ll	lm	lm	lm	lm	lm	lm	lm	lm
Marker509428	lmxll	lm	lm	lm	lm	ll	ll	lm	lm	lm	lm	ll	ll	lm	ll	lm	ll	lm	ll	ll	ll	lm	lm	ll	ll	lm	ll	lm	lm	lm	lm	lm	lm	lm	lm	lm	ll	lm	lm	lm	lm	ll	ll	ll	ll	ll	ll	ll	ll
Marker79487	lmxll	ll	ll	ll	ll	lm	lm	ll	ll	ll	ll	lm	lm	ll	lm	ll	lm	ll	lm	lm	lm	ll	ll	lm	lm	ll	lm	ll	ll	ll	ll	ll	ll	ll	ll	ll	lm	ll	ll	ll	ll	lm	lm	lm	lm	lm	lm	lm	lm
Marker187075	lmxll	lm	lm	lm	lm	ll	ll	lm	lm	lm	lm	ll	ll	lm	ll	lm	ll	lm	ll	ll	ll	lm	lm	ll	ll	lm	ll	lm	lm	lm	lm	lm	lm	lm	lm	lm	ll	lm	lm	lm	lm	ll	ll	ll	ll	ll	ll	ll	ll
Marker256712	nnxnp	nn	np	nn	nn	nn	nn	nn	nn	nn	nn	np	nn	np	np	nn	np	nn	nn	np	nn	nn	nn	nn	nn	np	nn	nn	np	np	nn	np	nn	np	np	nn	nn	np	nn	nn	nn	nn	np	nn	nn	np	np	nn	nn
Marker234746	lmxll	lm	lm	lm	lm	ll	ll	lm	lm	lm	lm	ll	ll	lm	ll	lm	ll	lm	ll	ll	ll	lm	lm	ll	ll	lm	ll	lm	lm	lm	lm	lm	lm	lm	lm	lm	ll	lm	lm	lm	lm	ll	ll	ll	ll	ll	ll	ll	ll
Marker125332	lmxll	lm	lm	lm	lm	ll	ll	lm	lm	lm	lm	ll	ll	lm	ll	lm	ll	lm	ll	ll	ll	lm	lm	ll	ll	lm	ll	lm	lm	lm	lm	lm	lm	lm	lm	lm	ll	lm	lm	lm	lm	ll	ll	ll	ll	ll	ll	ll	ll
Marker52474	hkxhk	hk	kk	hk	hk	hh	hh	hk	hk	hk	hk	hk	hh	kk	hk	hk	hk	hk	hh	hk	hh	hk	hk	hh	hh	kk	hh	hk	kk	kk	hk	kk	hk	kk	kk	hk	hh	kk	hk	hk	hk	hh	hk	hh	hh	hk	hk	hh	hh
Marker424285	lmxll	lm	lm	lm	lm	ll	ll	lm	lm	lm	lm	ll	ll	lm	ll	lm	ll	lm	ll	ll	ll	lm	lm	ll	ll	lm	ll	lm	lm	lm	lm	lm	lm	lm	lm	lm	ll	lm	lm	lm	lm	ll	ll	ll	ll	ll	ll	ll	ll
Marker194444	nnxnp	nn	np	nn	nn	nn	nn	nn	nn	nn	nn	np	nn	np	np	nn	np	nn	nn	np	nn	nn	nn	nn	nn	np	nn	nn	np	np	nn	np	nn	np	np	nn	nn	np	nn	nn	nn	nn	np	nn	nn	np	np	nn	nn
Marker280716	nnxnp	nn	np	nn	nn	nn	nn	nn	nn	nn	nn	np	nn	np	np	nn	np	nn	nn	np	nn	nn	nn	nn	nn	np	nn	nn	np	np	nn	np	nn	np	np	nn	nn	np	nn	nn	nn	nn	np	nn	nn	np	np	nn	nn
Marker99611	nnxnp	nn	np	nn	nn	nn	nn	nn	nn	nn	nn	np	nn	np	np	nn	np	nn	nn	np	nn	nn	nn	nn	nn	np	nn	nn	np	np	nn	np	nn	np	np	nn	nn	np	nn	nn	nn	nn	np	nn	nn	np	np	nn	nn
Marker342820	nnxnp	nn	np	nn	nn	nn	nn	nn	nn	nn	nn	np	nn	np	np	nn	np	nn	nn	np	nn	nn	nn	nn	nn	np	nn	nn	np	np	nn	np	nn	np	np	nn	nn	np	nn	nn	nn	nn	np	nn	nn	np	np	nn	nn
Marker287105	nnxnp	np	nn	np	np	np	np	np	np	np	np	nn	np	nn	nn	np	nn	np	np	nn	np	np	np	np	np	nn	np	np	nn	nn	np	nn	np	nn	nn	np	np	nn	np	np	np	np	nn	np	np	nn	nn	np	np
Marker239737	lmxll	lm	lm	lm	lm	ll	ll	lm	lm	lm	lm	ll	ll	lm	ll	lm	ll	lm	ll	ll	ll	lm	lm	ll	ll	lm	ll	lm	lm	lm	lm	lm	lm	lm	lm	lm	ll	lm	lm	lm	lm	ll	ll	ll	ll	ll	ll	ll	ll
Marker125307	lmxll	lm	lm	lm	lm	ll	lm	lm	lm	lm	lm	ll	ll	lm	ll	lm	ll	lm	ll	ll	ll	lm	lm	ll	ll	lm	ll	lm	lm	lm	lm	lm	lm	lm	lm	lm	ll	lm	lm	lm	lm	ll	ll	ll	ll	ll	ll	ll	ll
Marker263601	lmxll	lm	lm	lm	lm	ll	lm	lm	lm	lm	lm	ll	ll	lm	ll	lm	ll	lm	ll	ll	ll	lm	lm	ll	ll	lm	ll	lm	lm	lm	lm	lm	lm	lm	lm	lm	ll	lm	lm	lm	lm	ll	ll	ll	ll	ll	ll	ll	ll
Marker39955	lmxll	lm	lm	lm	lm	ll	lm	lm	lm	lm	lm	ll	ll	lm	ll	lm	ll	lm	ll	ll	ll	lm	lm	ll	ll	lm	ll	lm	lm	lm	lm	lm	lm	lm	lm	lm	ll	lm	lm	lm	lm	ll	ll	ll	ll	ll	ll	ll	ll
Marker594309	lmxll	ll	ll	ll	ll	lm	ll	ll	ll	ll	ll	lm	lm	ll	lm	ll	lm	ll	lm	lm	lm	ll	ll	lm	lm	ll	lm	ll	ll	ll	ll	ll	ll	ll	ll	ll	lm	ll	ll	ll	ll	lm	lm	lm	lm	lm	lm	lm	lm
Marker761884	lmxll	ll	ll	ll	ll	lm	ll	ll	ll	ll	ll	lm	lm	ll	lm	ll	lm	ll	lm	lm	lm	ll	ll	lm	lm	ll	lm	ll	ll	ll	ll	ll	ll	ll	ll	ll	lm	ll	ll	ll	ll	lm	lm	lm	lm	lm	lm	lm	lm
Marker130947	lmxll	ll	ll	ll	ll	lm	ll	ll	ll	ll	ll	lm	lm	ll	lm	ll	lm	ll	lm	lm	lm	ll	ll	lm	lm	ll	lm	ll	ll	ll	ll	ll	ll	ll	ll	ll	lm	ll	ll	ll	ll	lm	lm	lm	lm	lm	lm	lm	lm
Marker98288	lmxll	ll	ll	ll	ll	lm	lm	ll	ll	ll	ll	lm	lm	ll	lm	ll	lm	ll	lm	lm	lm	ll	ll	lm	lm	ll	lm	ll	ll	ll	ll	ll	ll	ll	ll	ll	lm	ll	ll	ll	ll	lm	lm	lm	lm	lm	lm	lm	lm
Marker118998	lmxll	ll	ll	ll	ll	lm	lm	ll	ll	ll	ll	lm	lm	ll	lm	ll	lm	ll	lm	lm	lm	ll	ll	lm	lm	ll	lm	ll	ll	ll	ll	ll	ll	ll	ll	ll	lm	ll	ll	ll	ll	lm	lm	lm	lm	lm	lm	lm	lm
Marker190482	lmxll	ll	ll	ll	ll	lm	lm	ll	ll	ll	ll	lm	lm	ll	lm	ll	lm	ll	lm	lm	lm	ll	ll	lm	lm	ll	lm	ll	ll	ll	ll	ll	ll	ll	ll	ll	lm	ll	ll	ll	ll	lm	lm	lm	lm	lm	lm	lm	lm
Marker475200	lmxll	ll	ll	ll	ll	lm	lm	ll	ll	ll	ll	lm	lm	ll	lm	ll	lm	ll	lm	lm	lm	ll	ll	lm	lm	ll	lm	ll	ll	ll	ll	ll	ll	ll	ll	ll	lm	ll	ll	ll	ll	lm	lm	lm	lm	lm	lm	lm	lm
Marker386149	lmxll	lm	lm	lm	lm	ll	ll	lm	lm	lm	lm	ll	ll	lm	ll	lm	ll	lm	ll	ll	ll	lm	lm	ll	ll	lm	ll	lm	lm	lm	lm	lm	lm	lm	lm	lm	ll	lm	lm	lm	lm	ll	ll	ll	ll	ll	ll	ll	ll
Marker203871	lmxll	ll	ll	ll	ll	lm	lm	ll	ll	ll	ll	lm	lm	ll	lm	ll	lm	ll	lm	lm	lm	ll	ll	lm	lm	ll	lm	ll	ll	ll	ll	ll	ll	ll	ll	ll	lm	ll	ll	ll	ll	lm	lm	lm	lm	lm	lm	lm	lm
Marker206122	lmxll	lm	lm	lm	lm	ll	ll	lm	lm	lm	lm	ll	ll	lm	ll	lm	ll	lm	ll	ll	ll	lm	lm	ll	ll	lm	ll	lm	lm	lm	lm	lm	lm	lm	lm	lm	ll	lm	lm	lm	lm	ll	ll	ll	ll	ll	ll	ll	ll
Marker93932	lmxll	lm	lm	lm	lm	ll	ll	lm	lm	lm	lm	ll	ll	lm	ll	lm	ll	lm	ll	ll	ll	lm	lm	ll	ll	lm	ll	lm	lm	lm	lm	lm	lm	lm	lm	lm	ll	lm	lm	lm	lm	ll	ll	ll	ll	ll	ll	ll	ll
Marker272460	lmxll	ll	ll	ll	ll	lm	lm	ll	ll	ll	ll	lm	lm	ll	lm	ll	lm	ll	lm	lm	lm	ll	ll	lm	lm	ll	lm	ll	ll	ll	ll	ll	ll	ll	ll	ll	lm	ll	ll	ll	ll	lm	lm	lm	lm	lm	lm	lm	lm
Marker67045	lmxll	ll	ll	ll	ll	lm	lm	ll	ll	ll	ll	lm	lm	ll	lm	ll	lm	ll	lm	lm	lm	ll	ll	lm	lm	ll	lm	ll	ll	ll	ll	ll	ll	ll	ll	ll	lm	ll	ll	ll	ll	lm	lm	lm	lm	lm	lm	lm	lm
Marker356428	lmxll	ll	ll	ll	ll	lm	lm	ll	ll	ll	ll	lm	lm	ll	lm	ll	lm	ll	lm	lm	lm	ll	ll	lm	lm	ll	lm	ll	ll	ll	ll	ll	ll	ll	ll	ll	lm	ll	ll	ll	ll	lm	lm	lm	lm	lm	lm	lm	lm
Marker270107	lmxll	ll	ll	ll	ll	lm	lm	ll	ll	ll	ll	lm	lm	ll	lm	ll	lm	ll	lm	lm	lm	ll	ll	lm	lm	ll	lm	ll	ll	ll	ll	ll	ll	ll	ll	ll	lm	ll	ll	ll	ll	lm	lm	lm	lm	lm	lm	lm	lm
Marker413118	efxeg	ee	eg	ee	ee	ef	ef	ee	ee	ee	ee	fg	ef	eg	fg	ee	fg	ee	ef	fg	ef	ee	ee	ef	ef	eg	ef	ee	eg	eg	ee	eg	ee	eg	eg	ee	ef	eg	ee	ee	ee	ef	fg	ef	ef	fg	fg	ef	ef
Marker336034	nnxnp	nn	np	nn	nn	nn	nn	nn	nn	nn	nn	np	nn	np	np	nn	np	nn	nn	np	nn	nn	nn	nn	nn	np	nn	nn	np	np	nn	np	nn	np	np	nn	nn	np	nn	nn	nn	nn	np	nn	nn	np	np	nn	nn
Marker355928	lmxll	ll	ll	ll	ll	lm	lm	ll	ll	ll	ll	lm	lm	ll	lm	ll	lm	ll	lm	lm	lm	ll	ll	lm	lm	ll	lm	ll	ll	ll	ll	ll	ll	ll	ll	ll	lm	ll	ll	ll	ll	lm	lm	lm	lm	lm	lm	lm	lm
Marker93237	lmxll	lm	lm	lm	lm	ll	ll	lm	lm	lm	lm	ll	ll	lm	ll	lm	ll	lm	ll	ll	ll	lm	lm	ll	ll	lm	ll	lm	lm	lm	lm	lm	lm	lm	lm	lm	ll	lm	lm	lm	lm	ll	ll	ll	ll	ll	ll	ll	ll
Marker162183	lmxll	ll	ll	ll	ll	lm	lm	ll	ll	ll	ll	lm	lm	ll	lm	ll	lm	ll	lm	lm	lm	ll	ll	lm	lm	ll	lm	ll	ll	ll	ll	ll	ll	ll	ll	ll	lm	ll	ll	ll	ll	lm	lm	lm	lm	lm	lm	lm	lm
Marker130193	lmxll	lm	lm	lm	lm	ll	ll	lm	lm	lm	lm	ll	ll	lm	ll	lm	ll	lm	ll	ll	ll	lm	lm	ll	ll	lm	ll	lm	lm	lm	lm	lm	lm	lm	lm	lm	ll	lm	lm	lm	lm	ll	ll	ll	ll	ll	ll	ll	ll
Marker448676	nnxnp	np	nn	np	np	np	np	np	np	np	np	nn	np	nn	nn	np	nn	np	np	nn	np	np	np	np	np	nn	np	np	nn	nn	np	nn	np	nn	nn	np	np	nn	np	np	np	np	nn	np	np	nn	nn	np	np
Marker52301	lmxll	ll	ll	ll	ll	lm	lm	ll	ll	ll	ll	lm	lm	ll	lm	ll	lm	ll	lm	lm	lm	ll	ll	lm	lm	ll	lm	ll	ll	ll	ll	ll	ll	ll	ll	ll	lm	ll	ll	ll	ll	lm	lm	lm	lm	lm	lm	lm	lm
Marker266681	lmxll	lm	lm	lm	lm	ll	ll	lm	lm	lm	lm	ll	ll	lm	ll	lm	ll	lm	ll	ll	ll	lm	lm	ll	ll	lm	ll	lm	lm	lm	lm	lm	lm	lm	lm	lm	ll	lm	lm	lm	lm	ll	ll	ll	ll	ll	ll	ll	ll
Marker303795	lmxll	ll	ll	ll	ll	lm	lm	ll	ll	ll	ll	lm	lm	ll	lm	ll	lm	ll	lm	lm	lm	ll	ll	lm	lm	ll	lm	ll	ll	ll	ll	ll	ll	ll	ll	ll	lm	ll	ll	ll	ll	lm	lm	lm	lm	lm	lm	lm	lm
Marker296008	nnxnp	nn	np	nn	nn	nn	nn	nn	nn	nn	nn	np	nn	np	np	nn	np	nn	nn	np	nn	nn	nn	nn	nn	np	nn	nn	np	np	nn	np	nn	np	np	nn	nn	np	nn	nn	nn	nn	np	nn	nn	np	np	nn	nn
Marker143654	lmxll	lm	lm	lm	lm	ll	ll	lm	lm	lm	lm	ll	ll	lm	ll	lm	ll	lm	ll	ll	ll	lm	lm	ll	ll	lm	ll	lm	lm	lm	lm	lm	lm	lm	lm	lm	ll	lm	lm	lm	lm	ll	ll	ll	ll	ll	ll	ll	ll
Marker372300	lmxll	lm	lm	lm	lm	ll	ll	lm	lm	lm	lm	ll	ll	lm	ll	lm	ll	lm	ll	ll	ll	lm	lm	ll	ll	lm	ll	lm	lm	lm	lm	lm	lm	lm	lm	lm	ll	lm	lm	lm	lm	ll	ll	ll	ll	ll	ll	ll	ll
Marker469738	lmxll	lm	lm	lm	lm	ll	ll	lm	lm	lm	lm	ll	ll	lm	ll	lm	ll	lm	ll	ll	ll	lm	lm	ll	ll	lm	ll	lm	lm	lm	lm	lm	lm	lm	lm	lm	ll	lm	lm	lm	lm	ll	ll	ll	ll	ll	ll	ll	ll
Marker484234	lmxll	lm	lm	lm	lm	ll	ll	lm	lm	lm	lm	ll	ll	lm	ll	lm	ll	lm	ll	ll	ll	lm	lm	ll	ll	lm	ll	lm	lm	lm	lm	lm	lm	lm	lm	lm	ll	lm	lm	lm	lm	ll	ll	ll	ll	ll	ll	ll	ll
Marker291301	lmxll	ll	ll	ll	ll	lm	lm	ll	ll	ll	ll	lm	lm	ll	lm	ll	lm	ll	lm	lm	lm	ll	ll	lm	lm	ll	lm	ll	ll	ll	ll	ll	ll	ll	ll	ll	lm	ll	ll	ll	ll	lm	lm	lm	lm	lm	lm	lm	lm
Marker525305	lmxll	lm	lm	lm	lm	ll	ll	lm	lm	lm	lm	ll	ll	lm	ll	lm	ll	lm	ll	ll	ll	lm	lm	ll	ll	lm	ll	lm	lm	lm	lm	lm	lm	lm	lm	lm	ll	lm	lm	lm	lm	ll	ll	ll	ll	ll	ll	ll	ll
Marker232518	lmxll	lm	lm	lm	lm	ll	ll	lm	lm	lm	lm	ll	ll	lm	ll	lm	ll	lm	ll	ll	ll	lm	lm	ll	ll	lm	ll	lm	lm	lm	lm	lm	lm	lm	lm	lm	ll	lm	lm	lm	lm	ll	ll	ll	ll	ll	ll	ll	ll
Marker297981	lmxll	ll	ll	ll	ll	lm	lm	ll	ll	ll	ll	lm	lm	ll	lm	ll	lm	ll	lm	lm	lm	ll	ll	lm	lm	ll	lm	ll	ll	ll	ll	ll	ll	ll	ll	ll	lm	ll	ll	ll	ll	lm	lm	lm	lm	lm	lm	lm	lm
Marker356559	lmxll	lm	lm	lm	lm	ll	ll	lm	lm	lm	lm	ll	ll	lm	ll	lm	ll	lm	ll	ll	ll	lm	lm	ll	ll	lm	ll	lm	lm	lm	lm	lm	lm	lm	lm	lm	ll	lm	lm	lm	lm	ll	ll	ll	ll	ll	ll	ll	ll
Marker430283	lmxll	ll	ll	ll	ll	lm	lm	ll	ll	ll	ll	lm	lm	ll	lm	ll	lm	ll	lm	lm	lm	ll	ll	lm	lm	ll	lm	ll	ll	ll	ll	ll	ll	ll	ll	ll	lm	ll	ll	ll	ll	lm	lm	lm	lm	lm	lm	lm	lm
Marker337894	lmxll	lm	lm	lm	lm	ll	ll	lm	lm	lm	lm	ll	ll	lm	ll	lm	ll	lm	ll	ll	ll	lm	lm	ll	ll	lm	ll	lm	lm	lm	lm	lm	lm	lm	lm	lm	ll	lm	lm	lm	lm	ll	ll	ll	ll	ll	ll	ll	ll
Marker354402	lmxll	lm	lm	lm	lm	ll	ll	lm	lm	lm	lm	ll	ll	lm	ll	lm	ll	lm	ll	ll	ll	lm	lm	ll	ll	lm	ll	lm	lm	lm	lm	lm	lm	lm	lm	lm	ll	lm	lm	lm	lm	ll	ll	ll	ll	ll	ll	ll	ll
Marker149004	nnxnp	nn	np	nn	nn	nn	nn	nn	nn	nn	nn	np	nn	np	np	nn	np	nn	nn	np	nn	nn	nn	nn	nn	np	nn	nn	nn	np	nn	np	nn	np	np	nn	nn	np	nn	nn	nn	nn	np	nn	nn	nn	np	nn	np
Marker360054	lmxll	lm	lm	lm	lm	ll	ll	lm	lm	lm	lm	ll	ll	lm	ll	lm	ll	lm	ll	ll	ll	lm	lm	ll	ll	lm	ll	lm	lm	lm	lm	lm	lm	lm	lm	lm	ll	lm	lm	lm	lm	ll	ll	ll	ll	ll	ll	ll	ll
Marker230391	lmxll	ll	ll	ll	ll	lm	lm	ll	ll	ll	ll	lm	lm	ll	lm	ll	lm	ll	lm	lm	lm	ll	ll	lm	lm	ll	lm	ll	ll	ll	ll	ll	ll	ll	ll	ll	lm	ll	ll	ll	ll	lm	lm	lm	lm	lm	lm	lm	lm
Marker211052	lmxll	ll	ll	ll	ll	lm	lm	ll	ll	ll	ll	lm	lm	ll	lm	ll	lm	ll	lm	lm	lm	ll	ll	lm	lm	ll	lm	ll	ll	ll	ll	ll	ll	ll	ll	ll	lm	ll	ll	ll	ll	lm	lm	lm	lm	lm	lm	lm	lm
Marker321676	lmxll	ll	ll	ll	ll	lm	lm	ll	ll	ll	ll	lm	lm	ll	lm	ll	lm	ll	lm	lm	lm	ll	ll	lm	lm	ll	lm	ll	ll	ll	ll	ll	ll	ll	ll	ll	lm	ll	ll	ll	ll	lm	lm	lm	lm	lm	lm	lm	lm
Marker387806	lmxll	lm	lm	lm	lm	ll	ll	lm	lm	lm	lm	ll	ll	lm	ll	lm	ll	lm	ll	ll	ll	lm	lm	ll	ll	lm	ll	lm	lm	lm	lm	lm	lm	lm	ll	lm	ll	lm	lm	lm	lm	ll	ll	ll	ll	ll	ll	ll	ll
Marker394614	lmxll	lm	lm	lm	lm	ll	ll	lm	lm	lm	lm	ll	ll	lm	ll	lm	ll	lm	ll	ll	ll	lm	lm	ll	ll	lm	ll	lm	lm	lm	lm	lm	lm	lm	ll	lm	ll	lm	lm	lm	lm	ll	ll	ll	ll	ll	ll	ll	ll
Marker339294	lmxll	ll	ll	ll	ll	lm	lm	ll	ll	ll	ll	lm	lm	ll	lm	ll	lm	ll	lm	lm	lm	ll	ll	lm	lm	ll	lm	ll	ll	ll	ll	ll	ll	ll	lm	ll	lm	lm	ll	ll	ll	lm	lm	lm	lm	lm	lm	lm	lm
Marker380981	lmxll	lm	lm	lm	lm	ll	ll	lm	lm	lm	lm	ll	ll	lm	ll	lm	ll	lm	ll	ll	ll	lm	lm	ll	ll	lm	ll	lm	lm	lm	lm	lm	lm	lm	ll	lm	ll	ll	lm	lm	lm	ll	ll	ll	ll	ll	ll	ll	ll
Marker112189	lmxll	lm	lm	lm	lm	ll	ll	lm	lm	lm	lm	ll	ll	lm	ll	lm	ll	lm	ll	ll	ll	lm	lm	ll	ll	lm	ll	lm	lm	lm	lm	lm	lm	lm	ll	lm	ll	ll	lm	lm	lm	ll	ll	ll	ll	ll	ll	ll	ll
Marker499809	lmxll	lm	lm	lm	lm	ll	ll	lm	lm	lm	lm	ll	ll	lm	ll	lm	ll	lm	ll	ll	ll	lm	lm	ll	ll	lm	ll	lm	lm	lm	lm	lm	lm	lm	ll	lm	ll	ll	lm	lm	lm	ll	ll	ll	ll	ll	ll	ll	ll
Marker130609	lmxll	lm	lm	lm	lm	ll	ll	lm	lm	lm	lm	ll	ll	lm	ll	lm	ll	lm	ll	ll	ll	lm	lm	ll	ll	lm	ll	lm	lm	lm	lm	lm	lm	lm	ll	lm	ll	ll	lm	lm	lm	ll	ll	ll	ll	ll	ll	ll	ll
Marker646123	lmxll	lm	lm	lm	lm	ll	ll	lm	lm	lm	lm	ll	ll	lm	ll	lm	ll	lm	ll	ll	ll	lm	lm	ll	ll	lm	ll	lm	lm	lm	lm	lm	lm	lm	ll	lm	ll	ll	lm	lm	lm	ll	ll	ll	ll	ll	ll	ll	ll
Marker91115	lmxll	ll	ll	ll	ll	lm	lm	ll	ll	ll	ll	lm	lm	ll	lm	ll	lm	ll	lm	lm	lm	ll	ll	lm	lm	ll	lm	ll	ll	ll	ll	ll	ll	ll	lm	ll	lm	lm	ll	ll	ll	lm	lm	lm	lm	lm	lm	lm	lm
Marker428347	lmxll	ll	ll	ll	ll	lm	lm	ll	ll	ll	ll	lm	lm	ll	lm	ll	lm	ll	lm	lm	lm	ll	ll	lm	lm	ll	lm	ll	ll	ll	ll	ll	ll	ll	lm	ll	lm	lm	ll	ll	ll	lm	lm	lm	lm	lm	lm	lm	lm
Marker476107	lmxll	lm	lm	lm	lm	ll	ll	lm	lm	lm	lm	ll	ll	lm	ll	lm	ll	lm	ll	ll	ll	lm	lm	ll	lm	lm	ll	lm	lm	lm	lm	lm	lm	lm	ll	lm	ll	ll	lm	lm	lm	ll	ll	ll	ll	ll	ll	ll	ll
Marker495591	lmxll	ll	ll	ll	ll	lm	lm	ll	ll	ll	ll	lm	lm	ll	lm	ll	lm	ll	lm	lm	lm	ll	ll	lm	ll	ll	lm	ll	ll	ll	ll	ll	ll	ll	lm	ll	lm	lm	ll	ll	ll	lm	lm	lm	lm	lm	lm	lm	lm
Marker87014	lmxll	lm	lm	lm	lm	ll	ll	lm	lm	lm	lm	ll	ll	lm	ll	lm	ll	lm	ll	ll	ll	lm	lm	ll	lm	lm	ll	lm	lm	lm	lm	lm	lm	lm	ll	lm	ll	ll	lm	lm	lm	ll	ll	ll	ll	ll	ll	ll	ll
Marker208290	lmxll	lm	lm	lm	lm	ll	ll	lm	lm	lm	lm	ll	ll	lm	ll	lm	ll	lm	ll	ll	ll	lm	lm	ll	lm	lm	ll	lm	lm	lm	lm	lm	lm	lm	ll	lm	ll	ll	lm	lm	lm	ll	ll	ll	ll	ll	ll	ll	ll
Marker480707	lmxll	lm	lm	lm	lm	ll	ll	lm	lm	lm	lm	ll	ll	lm	ll	lm	ll	lm	ll	ll	ll	lm	lm	ll	ll	lm	ll	lm	lm	lm	lm	lm	lm	lm	ll	lm	ll	ll	lm	lm	lm	ll	ll	ll	ll	ll	ll	ll	ll
Marker427451	lmxll	ll	ll	ll	ll	lm	lm	ll	ll	ll	ll	lm	lm	ll	lm	ll	lm	ll	lm	lm	lm	ll	ll	lm	lm	ll	lm	ll	ll	ll	ll	ll	ll	ll	lm	ll	lm	lm	ll	ll	ll	lm	lm	lm	lm	lm	lm	lm	lm
Marker537211	lmxll	ll	ll	ll	ll	lm	lm	ll	ll	ll	ll	lm	lm	ll	lm	ll	lm	ll	lm	lm	lm	ll	ll	lm	lm	ll	lm	ll	ll	ll	ll	ll	ll	ll	lm	ll	lm	lm	ll	ll	ll	lm	lm	lm	lm	lm	lm	lm	lm
Marker41505	lmxll	lm	lm	lm	lm	ll	ll	lm	lm	lm	lm	ll	ll	lm	ll	lm	ll	lm	ll	ll	ll	lm	lm	ll	lm	lm	ll	lm	lm	lm	lm	lm	lm	lm	ll	lm	ll	ll	lm	lm	lm	ll	ll	ll	ll	ll	ll	ll	ll
Marker125890	lmxll	lm	lm	lm	lm	ll	ll	lm	lm	lm	lm	ll	ll	lm	ll	lm	ll	lm	ll	ll	ll	lm	lm	ll	lm	lm	ll	lm	lm	lm	lm	lm	lm	lm	ll	lm	ll	ll	lm	lm	lm	ll	ll	ll	ll	ll	ll	ll	ll
Marker74491	lmxll	lm	lm	lm	lm	ll	ll	lm	lm	lm	lm	ll	ll	lm	ll	lm	ll	lm	ll	ll	ll	lm	lm	ll	lm	lm	ll	lm	lm	lm	lm	lm	lm	lm	ll	lm	ll	ll	lm	lm	lm	ll	ll	ll	ll	ll	ll	ll	ll
Marker255646	nnxnp	nn	np	nn	nn	nn	np	nn	np	nn	nn	np	np	np	np	nn	np	nn	nn	np	nn	nn	np	np	nn	nn	nn	nn	nn	np	nn	nn	nn	nn	np	nn	nn	np	nn	nn	nn	np	np	nn	nn	nn	np	nn	np
Marker248307	lmxll	ll	ll	ll	ll	lm	lm	ll	ll	ll	ll	lm	lm	ll	lm	ll	lm	ll	lm	lm	lm	ll	ll	lm	ll	ll	lm	ll	ll	ll	ll	ll	ll	ll	lm	ll	lm	lm	ll	ll	ll	lm	lm	lm	lm	lm	lm	lm	lm
Marker435926	lmxll	ll	ll	ll	ll	lm	lm	ll	ll	ll	ll	lm	lm	ll	lm	ll	lm	ll	lm	lm	lm	ll	ll	lm	ll	ll	lm	ll	ll	ll	ll	ll	ll	ll	lm	ll	lm	lm	ll	ll	ll	lm	lm	lm	lm	lm	lm	lm	lm
Marker94355	lmxll	lm	lm	lm	lm	ll	ll	lm	lm	lm	lm	ll	ll	lm	ll	lm	ll	lm	ll	ll	ll	lm	lm	ll	lm	lm	ll	lm	lm	lm	lm	lm	lm	lm	ll	lm	ll	ll	lm	lm	lm	ll	ll	ll	ll	ll	ll	ll	ll
Marker758751	lmxll	lm	lm	lm	lm	ll	ll	lm	lm	lm	lm	ll	ll	lm	ll	lm	ll	lm	ll	ll	ll	lm	lm	ll	lm	lm	ll	lm	lm	lm	lm	lm	lm	lm	ll	lm	ll	ll	lm	lm	lm	ll	ll	ll	ll	ll	ll	ll	ll
Marker147653	lmxll	lm	lm	lm	lm	ll	ll	lm	lm	lm	lm	ll	ll	lm	ll	lm	ll	lm	ll	ll	ll	lm	lm	ll	lm	lm	ll	lm	lm	lm	lm	lm	lm	lm	ll	lm	ll	ll	lm	lm	lm	ll	ll	ll	ll	ll	ll	ll	ll
Marker228528	lmxll	lm	lm	lm	lm	ll	ll	lm	lm	lm	lm	ll	ll	lm	ll	lm	ll	lm	ll	ll	ll	lm	lm	ll	lm	lm	ll	lm	lm	lm	lm	lm	lm	lm	ll	lm	ll	ll	lm	lm	lm	ll	ll	ll	ll	ll	ll	ll	ll
Marker207098	efxeg	ef	fg	ef	ef	ee	eg	ef	fg	ef	ef	eg	eg	fg	eg	ef	eg	ef	ee	eg	ee	ef	fg	eg	ef	ef	ee	ef	ef	fg	ef	ef	ef	ef	eg	ef	ee	eg	ef	ef	ef	eg	eg	ee	ee	ee	eg	ee	eg
Marker428338	lmxll	lm	lm	lm	lm	ll	ll	lm	lm	lm	lm	ll	ll	lm	ll	lm	ll	lm	ll	ll	ll	lm	lm	ll	lm	lm	ll	lm	lm	lm	lm	lm	lm	lm	ll	lm	ll	ll	lm	lm	lm	ll	ll	ll	ll	ll	ll	ll	ll
Marker476471	nnxnp	np	nn	np	np	np	nn	np	nn	np	np	nn	nn	nn	nn	np	nn	np	np	nn	np	np	nn	nn	np	np	np	np	np	nn	np	np	np	np	nn	np	np	nn	np	np	np	nn	nn	np	np	np	nn	np	nn
Marker414148	lmxll	ll	ll	ll	ll	lm	lm	ll	ll	ll	ll	lm	lm	ll	lm	ll	lm	ll	lm	lm	lm	ll	ll	lm	ll	ll	lm	ll	ll	ll	ll	ll	ll	ll	lm	ll	lm	lm	ll	ll	ll	lm	lm	lm	lm	lm	lm	lm	lm
Marker74935	lmxll	lm	lm	lm	lm	ll	ll	lm	lm	lm	lm	ll	ll	lm	ll	lm	ll	lm	ll	ll	ll	lm	lm	ll	lm	lm	ll	lm	lm	lm	lm	lm	lm	lm	ll	lm	ll	ll	lm	lm	lm	ll	ll	ll	ll	ll	ll	ll	ll
Marker133571	lmxll	lm	lm	lm	lm	ll	ll	lm	lm	lm	lm	ll	ll	lm	ll	lm	ll	lm	ll	ll	ll	lm	lm	ll	lm	lm	ll	lm	lm	lm	lm	lm	lm	lm	ll	lm	ll	ll	lm	lm	lm	ll	ll	ll	ll	ll	ll	ll	ll
Marker245069	lmxll	lm	lm	lm	lm	ll	ll	lm	lm	lm	lm	ll	ll	lm	ll	lm	ll	lm	ll	ll	ll	lm	lm	ll	lm	lm	ll	lm	lm	lm	lm	lm	lm	lm	ll	lm	ll	ll	lm	lm	lm	ll	ll	ll	ll	ll	ll	ll	ll
Marker436001	lmxll	lm	lm	lm	lm	ll	ll	lm	lm	lm	lm	ll	ll	lm	ll	lm	ll	lm	ll	ll	ll	lm	lm	ll	lm	lm	ll	lm	lm	lm	lm	lm	lm	lm	ll	lm	ll	ll	lm	lm	lm	ll	ll	ll	ll	ll	ll	ll	ll
Marker311336	lmxll	ll	ll	ll	ll	lm	lm	ll	ll	ll	ll	lm	lm	ll	lm	ll	lm	ll	lm	lm	lm	ll	ll	lm	ll	ll	lm	ll	ll	ll	ll	ll	ll	ll	lm	ll	lm	lm	ll	ll	ll	lm	lm	lm	lm	lm	lm	lm	lm
Marker386133	lmxll	lm	lm	lm	lm	ll	ll	lm	lm	lm	lm	ll	ll	lm	ll	lm	ll	lm	ll	ll	ll	lm	lm	ll	lm	lm	ll	lm	lm	lm	lm	lm	lm	lm	ll	lm	ll	ll	lm	lm	lm	ll	ll	ll	ll	ll	ll	ll	ll
Marker160301	hkxhk	kk	hk	kk	kk	hk	hh	kk	hk	kk	kk	hh	hh	hk	hh	kk	hh	kk	hk	hh	hk	kk	hk	hh	kk	kk	hk	kk	kk	hk	kk	kk	kk	kk	hh	kk	hk	hh	kk	kk	kk	hh	hh	hk	hk	hk	hh	hk	hh
Marker171723	lmxll	lm	lm	lm	lm	ll	ll	lm	lm	lm	lm	ll	ll	lm	ll	lm	ll	lm	ll	ll	ll	lm	lm	ll	lm	lm	ll	lm	lm	lm	lm	lm	lm	lm	ll	lm	ll	ll	lm	lm	lm	ll	ll	ll	ll	ll	ll	ll	ll
Marker563460	lmxll	lm	lm	lm	lm	ll	ll	lm	lm	lm	lm	ll	ll	lm	ll	lm	ll	lm	ll	ll	ll	lm	lm	ll	lm	lm	ll	lm	lm	lm	lm	lm	lm	lm	ll	lm	ll	ll	lm	lm	lm	ll	ll	ll	ll	ll	ll	ll	ll
Marker189110	lmxll	lm	lm	lm	lm	ll	ll	lm	lm	lm	lm	ll	ll	lm	ll	lm	ll	lm	ll	ll	ll	lm	lm	ll	lm	lm	ll	lm	lm	lm	lm	lm	lm	lm	ll	lm	ll	ll	lm	lm	lm	ll	ll	ll	ll	ll	ll	ll	ll
Marker233876	nnxnp	nn	np	nn	nn	nn	np	nn	np	nn	nn	np	np	np	np	nn	np	nn	nn	np	nn	nn	np	np	nn	nn	nn	nn	nn	np	nn	nn	nn	nn	np	nn	nn	np	nn	nn	nn	np	np	nn	nn	nn	np	nn	np
Marker313984	lmxll	lm	lm	lm	lm	ll	ll	lm	lm	lm	lm	ll	ll	lm	ll	lm	ll	lm	ll	ll	ll	lm	lm	ll	lm	ll	ll	lm	lm	lm	lm	lm	lm	lm	ll	lm	ll	ll	lm	lm	lm	ll	ll	ll	ll	ll	ll	ll	ll
Marker297341	lmxll	lm	lm	lm	lm	ll	ll	lm	lm	lm	lm	ll	ll	lm	ll	lm	ll	lm	ll	ll	ll	lm	lm	ll	lm	ll	ll	lm	lm	lm	lm	lm	lm	lm	ll	lm	ll	ll	lm	lm	lm	ll	ll	ll	ll	ll	ll	ll	ll
Marker120320	lmxll	ll	ll	ll	ll	lm	lm	ll	ll	ll	ll	lm	lm	ll	lm	ll	lm	ll	lm	lm	lm	ll	ll	lm	ll	lm	lm	ll	ll	ll	ll	ll	ll	ll	lm	ll	lm	lm	ll	ll	ll	lm	lm	lm	lm	lm	lm	lm	lm
Marker229421	lmxll	lm	lm	lm	lm	ll	ll	lm	lm	lm	lm	ll	ll	lm	ll	lm	ll	lm	ll	ll	ll	lm	lm	ll	lm	ll	ll	lm	lm	lm	lm	lm	lm	lm	ll	lm	ll	ll	lm	lm	lm	ll	ll	ll	ll	ll	ll	ll	ll
Marker308160	lmxll	ll	ll	ll	ll	lm	lm	ll	ll	ll	ll	lm	lm	ll	lm	ll	lm	ll	lm	lm	lm	ll	ll	lm	ll	lm	ll	ll	ll	ll	ll	ll	ll	ll	lm	ll	lm	lm	ll	ll	ll	lm	lm	lm	lm	lm	lm	lm	lm
Marker202855	lmxll	ll	ll	ll	ll	lm	lm	ll	ll	ll	ll	lm	lm	ll	lm	ll	lm	ll	lm	lm	lm	ll	ll	lm	ll	lm	ll	ll	ll	ll	ll	ll	ll	ll	lm	ll	lm	lm	ll	ll	ll	lm	lm	lm	lm	lm	lm	lm	lm
Marker201807	lmxll	ll	ll	ll	ll	lm	lm	ll	ll	ll	ll	lm	lm	ll	lm	ll	lm	ll	lm	lm	lm	ll	ll	lm	ll	lm	ll	ll	ll	ll	ll	ll	ll	ll	lm	ll	lm	lm	ll	ll	ll	lm	lm	lm	lm	lm	lm	lm	lm
Marker116827	lmxll	lm	lm	lm	lm	ll	ll	lm	lm	lm	lm	ll	ll	lm	ll	lm	ll	lm	ll	ll	ll	lm	lm	ll	lm	ll	lm	lm	lm	lm	lm	lm	lm	lm	ll	lm	ll	ll	lm	lm	lm	ll	ll	ll	ll	ll	ll	ll	ll
Marker52898	lmxll	lm	lm	lm	lm	ll	ll	lm	lm	lm	lm	ll	ll	lm	ll	lm	ll	lm	ll	ll	ll	lm	lm	ll	lm	ll	lm	lm	lm	lm	lm	lm	lm	lm	ll	lm	ll	ll	lm	lm	lm	ll	ll	ll	ll	ll	ll	ll	ll
Marker368659	lmxll	ll	ll	ll	ll	lm	lm	ll	ll	ll	ll	lm	lm	ll	lm	ll	lm	ll	lm	lm	lm	ll	ll	lm	ll	lm	ll	ll	ll	ll	ll	ll	ll	ll	lm	ll	lm	lm	lm	ll	ll	lm	lm	lm	lm	lm	lm	lm	lm
Marker195940	lmxll	ll	ll	ll	ll	lm	lm	ll	ll	ll	ll	lm	lm	ll	lm	ll	lm	ll	lm	lm	lm	ll	ll	lm	ll	lm	ll	ll	ll	ll	ll	ll	ll	ll	lm	ll	lm	lm	lm	ll	ll	lm	lm	lm	lm	lm	lm	lm	lm
Marker152608	lmxll	ll	ll	ll	ll	lm	lm	ll	ll	ll	ll	lm	lm	ll	lm	ll	lm	ll	lm	lm	lm	ll	ll	lm	ll	lm	ll	ll	ll	ll	ll	ll	ll	ll	lm	ll	lm	lm	lm	ll	ll	lm	lm	lm	lm	lm	lm	lm	lm
Marker288296	lmxll	ll	ll	ll	ll	lm	lm	ll	ll	ll	ll	lm	lm	ll	lm	ll	lm	ll	lm	lm	lm	ll	ll	lm	ll	lm	ll	ll	ll	ll	ll	ll	ll	ll	lm	ll	lm	lm	lm	ll	ll	lm	lm	lm	lm	lm	lm	lm	lm
Marker217593	lmxll	ll	ll	ll	ll	lm	lm	ll	ll	ll	ll	lm	lm	ll	lm	ll	lm	ll	lm	lm	lm	ll	ll	lm	ll	lm	ll	ll	ll	ll	ll	ll	ll	ll	lm	ll	lm	lm	lm	ll	ll	lm	lm	lm	lm	lm	lm	lm	lm
Marker732598	lmxll	ll	ll	ll	ll	lm	lm	ll	ll	ll	ll	lm	lm	ll	lm	ll	lm	ll	lm	lm	lm	ll	ll	lm	ll	lm	ll	ll	ll	ll	ll	ll	ll	ll	lm	ll	lm	lm	lm	ll	ll	lm	lm	lm	lm	lm	lm	lm	lm
Marker164507	lmxll	lm	lm	lm	lm	ll	ll	lm	lm	lm	lm	ll	ll	lm	ll	lm	ll	lm	ll	ll	ll	lm	lm	ll	lm	ll	lm	lm	lm	lm	lm	lm	lm	lm	ll	lm	ll	ll	ll	lm	lm	ll	ll	ll	ll	ll	ll	ll	ll
Marker255565	lmxll	ll	ll	ll	ll	lm	lm	ll	ll	ll	ll	lm	lm	ll	lm	ll	lm	ll	lm	lm	lm	ll	ll	lm	ll	lm	ll	ll	ll	ll	ll	ll	ll	ll	lm	ll	lm	lm	lm	ll	ll	lm	lm	lm	lm	lm	lm	lm	lm
Marker302314	lmxll	ll	ll	ll	ll	lm	lm	ll	ll	ll	ll	lm	lm	ll	lm	ll	lm	ll	lm	lm	lm	ll	ll	lm	ll	lm	ll	ll	ll	ll	ll	ll	ll	ll	lm	ll	lm	lm	lm	ll	ll	lm	lm	lm	lm	lm	lm	lm	lm
Marker389150	lmxll	lm	lm	lm	lm	ll	ll	lm	lm	lm	lm	ll	ll	lm	ll	lm	ll	lm	ll	ll	ll	lm	lm	ll	lm	ll	lm	lm	lm	lm	lm	lm	lm	lm	ll	lm	ll	ll	ll	lm	lm	ll	ll	ll	ll	ll	ll	ll	ll
Marker171782	lmxll	ll	ll	ll	ll	lm	lm	ll	ll	ll	ll	lm	lm	ll	lm	ll	lm	ll	lm	lm	lm	ll	ll	lm	ll	lm	ll	ll	ll	ll	ll	ll	ll	ll	lm	ll	lm	lm	lm	ll	ll	lm	lm	lm	lm	lm	lm	lm	lm
Marker382939	lmxll	ll	ll	ll	ll	lm	lm	ll	ll	ll	ll	lm	lm	ll	lm	ll	lm	ll	lm	lm	lm	ll	ll	lm	ll	lm	ll	ll	ll	ll	ll	ll	ll	ll	lm	ll	lm	lm	lm	ll	ll	lm	lm	lm	lm	lm	lm	lm	lm
Marker157109	lmxll	ll	ll	ll	ll	lm	lm	ll	ll	ll	ll	lm	lm	ll	lm	ll	lm	ll	lm	lm	lm	ll	ll	lm	ll	lm	ll	ll	ll	ll	ll	ll	ll	ll	lm	ll	lm	lm	lm	ll	ll	lm	lm	lm	lm	lm	lm	lm	lm
Marker357921	lmxll	ll	ll	ll	ll	lm	lm	ll	ll	ll	ll	lm	lm	ll	lm	ll	lm	ll	lm	lm	lm	ll	ll	lm	ll	lm	ll	ll	ll	ll	ll	ll	ll	ll	lm	ll	lm	lm	lm	ll	ll	lm	lm	lm	lm	lm	lm	lm	lm
Marker224052	lmxll	ll	ll	ll	ll	lm	lm	ll	ll	ll	ll	lm	lm	ll	lm	ll	lm	ll	lm	lm	lm	ll	ll	lm	ll	lm	ll	ll	ll	ll	ll	ll	ll	ll	lm	ll	lm	lm	lm	ll	ll	lm	lm	lm	lm	lm	lm	lm	lm
Marker106625	lmxll	ll	ll	ll	ll	lm	lm	ll	ll	ll	ll	lm	lm	ll	lm	ll	lm	ll	lm	lm	lm	ll	ll	lm	ll	lm	ll	ll	ll	ll	ll	ll	ll	ll	lm	ll	lm	lm	lm	ll	ll	lm	lm	lm	lm	lm	lm	lm	lm
Marker121313	lmxll	ll	ll	ll	ll	lm	lm	ll	ll	ll	ll	lm	lm	ll	lm	ll	lm	ll	lm	lm	lm	ll	ll	lm	ll	lm	ll	ll	ll	ll	ll	ll	ll	ll	lm	ll	lm	lm	lm	ll	ll	lm	lm	lm	lm	lm	lm	lm	lm
Marker191876	lmxll	ll	ll	ll	ll	lm	lm	ll	ll	ll	ll	lm	lm	ll	lm	ll	lm	ll	lm	lm	lm	ll	ll	lm	ll	lm	ll	ll	ll	ll	ll	ll	ll	ll	lm	ll	lm	lm	lm	ll	ll	lm	lm	lm	lm	lm	lm	lm	lm
Marker433661	lmxll	ll	ll	ll	ll	lm	lm	ll	ll	ll	ll	lm	lm	ll	lm	ll	lm	ll	lm	lm	lm	ll	ll	lm	ll	lm	ll	ll	ll	ll	ll	ll	ll	ll	lm	ll	lm	lm	lm	ll	ll	lm	lm	lm	lm	lm	lm	lm	lm
Marker720826	lmxll	lm	lm	lm	lm	ll	ll	lm	lm	lm	lm	ll	ll	lm	ll	lm	ll	lm	ll	ll	ll	lm	lm	ll	lm	ll	lm	lm	lm	lm	lm	lm	lm	lm	ll	lm	ll	ll	ll	lm	lm	ll	ll	ll	ll	ll	ll	ll	ll
Marker153318	lmxll	lm	lm	lm	lm	ll	ll	lm	lm	lm	lm	ll	ll	lm	ll	lm	ll	lm	ll	ll	ll	lm	lm	ll	lm	ll	lm	lm	lm	lm	lm	lm	lm	lm	ll	lm	ll	ll	ll	lm	lm	ll	ll	ll	ll	ll	ll	ll	ll
Marker110632	lmxll	lm	lm	lm	lm	ll	ll	lm	lm	lm	lm	ll	ll	lm	ll	lm	ll	lm	ll	ll	ll	lm	lm	ll	lm	ll	lm	lm	lm	lm	lm	lm	lm	lm	ll	lm	ll	ll	ll	lm	lm	ll	ll	ll	ll	ll	ll	ll	ll
Marker311699	lmxll	ll	ll	ll	ll	lm	lm	ll	ll	ll	ll	lm	lm	ll	lm	ll	lm	ll	lm	lm	lm	ll	ll	lm	ll	lm	ll	ll	ll	ll	ll	ll	ll	ll	lm	ll	lm	lm	lm	ll	ll	lm	lm	lm	lm	lm	lm	lm	lm
Marker154411	lmxll	ll	ll	ll	ll	lm	lm	ll	ll	ll	ll	lm	lm	ll	lm	ll	lm	ll	lm	lm	lm	ll	ll	lm	ll	lm	ll	ll	ll	ll	ll	ll	ll	ll	lm	ll	lm	lm	lm	ll	ll	lm	lm	lm	lm	lm	lm	lm	lm
Marker280926	lmxll	ll	ll	ll	ll	lm	lm	ll	ll	ll	ll	lm	lm	ll	lm	ll	lm	ll	lm	lm	lm	ll	ll	lm	ll	lm	ll	ll	ll	ll	ll	ll	ll	ll	lm	ll	lm	lm	lm	ll	ll	lm	lm	lm	lm	lm	lm	lm	lm
Marker389464	lmxll	ll	ll	ll	ll	lm	lm	ll	ll	ll	ll	lm	lm	ll	lm	ll	lm	ll	lm	lm	lm	ll	ll	lm	ll	lm	ll	ll	ll	ll	ll	ll	ll	ll	lm	ll	lm	lm	lm	ll	ll	lm	lm	lm	lm	lm	lm	lm	lm
Marker297384	lmxll	ll	ll	ll	ll	lm	lm	ll	ll	ll	ll	lm	lm	ll	lm	ll	lm	ll	lm	lm	lm	ll	ll	lm	ll	lm	ll	ll	ll	ll	ll	ll	ll	ll	lm	ll	lm	lm	lm	ll	ll	lm	lm	lm	lm	lm	lm	lm	lm
Marker395901	lmxll	ll	ll	ll	ll	lm	lm	ll	ll	ll	ll	lm	lm	ll	lm	ll	lm	ll	lm	lm	lm	ll	ll	lm	ll	lm	ll	ll	ll	ll	ll	ll	ll	ll	lm	ll	lm	lm	lm	ll	ll	lm	lm	lm	lm	lm	lm	lm	lm
Marker506546	lmxll	ll	ll	ll	ll	lm	lm	ll	ll	ll	ll	lm	lm	ll	lm	ll	lm	ll	lm	lm	lm	ll	ll	lm	ll	lm	ll	ll	ll	ll	ll	ll	ll	ll	lm	ll	lm	lm	lm	ll	ll	lm	lm	lm	lm	lm	lm	lm	lm
Marker600616	lmxll	ll	ll	ll	ll	lm	lm	ll	ll	ll	ll	lm	lm	ll	lm	ll	lm	ll	lm	lm	lm	ll	ll	lm	ll	lm	ll	ll	ll	ll	ll	ll	ll	ll	lm	ll	lm	lm	lm	ll	ll	lm	lm	lm	lm	lm	lm	lm	lm
Marker399872	lmxll	ll	ll	ll	ll	lm	lm	ll	ll	ll	ll	lm	lm	ll	lm	ll	lm	ll	lm	lm	lm	ll	ll	lm	ll	lm	ll	ll	ll	ll	ll	ll	ll	ll	lm	ll	lm	lm	lm	ll	ll	lm	lm	lm	lm	lm	lm	lm	lm
Marker517429	lmxll	lm	lm	lm	lm	ll	ll	lm	lm	lm	lm	ll	ll	lm	ll	lm	ll	lm	ll	ll	ll	lm	lm	ll	lm	ll	lm	lm	lm	lm	lm	lm	lm	lm	ll	lm	ll	ll	ll	lm	lm	ll	ll	ll	ll	ll	ll	ll	ll
Marker440710	lmxll	lm	lm	lm	lm	ll	ll	lm	lm	lm	lm	ll	ll	lm	ll	lm	ll	lm	ll	ll	ll	lm	lm	ll	lm	ll	lm	lm	lm	lm	lm	lm	lm	lm	ll	lm	ll	ll	ll	lm	lm	ll	ll	ll	ll	ll	ll	ll	ll
Marker328830	lmxll	ll	ll	ll	ll	lm	lm	ll	ll	ll	ll	lm	lm	ll	lm	ll	lm	ll	lm	lm	lm	ll	ll	lm	ll	lm	ll	ll	ll	ll	ll	ll	ll	ll	lm	ll	lm	lm	lm	ll	ll	lm	lm	lm	lm	lm	lm	lm	lm
Marker259317	lmxll	lm	lm	lm	lm	ll	ll	lm	lm	lm	lm	ll	ll	lm	ll	lm	ll	lm	ll	ll	ll	lm	lm	ll	lm	ll	lm	lm	lm	lm	lm	lm	lm	lm	ll	lm	ll	ll	ll	lm	lm	ll	ll	ll	ll	ll	ll	ll	ll
Marker404489	lmxll	lm	lm	lm	lm	ll	ll	lm	lm	lm	lm	ll	ll	lm	ll	lm	ll	lm	ll	ll	ll	lm	lm	ll	lm	ll	lm	lm	lm	lm	lm	lm	lm	lm	ll	lm	ll	ll	ll	lm	lm	ll	ll	ll	ll	ll	ll	ll	ll
Marker605020	lmxll	lm	lm	lm	lm	ll	ll	lm	lm	lm	lm	ll	ll	lm	ll	lm	ll	lm	ll	ll	ll	lm	lm	ll	lm	ll	lm	lm	lm	lm	lm	lm	lm	lm	ll	lm	ll	ll	ll	lm	lm	ll	ll	ll	ll	ll	ll	ll	ll
Marker208550	lmxll	lm	lm	lm	lm	ll	ll	lm	lm	lm	lm	ll	ll	lm	ll	lm	ll	lm	ll	ll	ll	lm	lm	ll	lm	ll	lm	lm	lm	lm	lm	lm	lm	lm	ll	lm	ll	ll	ll	lm	lm	ll	ll	ll	ll	ll	ll	ll	ll
Marker468896	lmxll	lm	lm	lm	lm	ll	ll	lm	lm	lm	lm	ll	ll	lm	ll	lm	ll	lm	ll	ll	ll	lm	lm	ll	lm	ll	lm	lm	lm	lm	lm	lm	lm	lm	ll	lm	ll	ll	ll	lm	lm	ll	ll	ll	ll	ll	ll	ll	ll
Marker223478	lmxll	lm	lm	lm	lm	ll	ll	lm	lm	lm	lm	ll	ll	lm	ll	lm	ll	lm	ll	ll	ll	lm	lm	ll	lm	ll	lm	lm	lm	lm	lm	lm	lm	lm	ll	lm	ll	ll	ll	lm	lm	ll	ll	ll	ll	ll	ll	ll	ll
Marker162317	lmxll	lm	lm	lm	lm	ll	ll	lm	lm	lm	lm	ll	ll	lm	ll	lm	ll	lm	ll	ll	ll	lm	lm	ll	lm	ll	lm	lm	lm	lm	lm	lm	lm	lm	ll	lm	ll	ll	ll	lm	lm	ll	ll	ll	ll	ll	ll	ll	ll
Marker176951	lmxll	ll	ll	ll	ll	lm	lm	ll	ll	ll	ll	lm	lm	ll	lm	ll	lm	ll	lm	lm	lm	ll	ll	lm	ll	lm	ll	ll	ll	ll	ll	ll	ll	ll	lm	ll	lm	lm	lm	ll	ll	lm	lm	lm	lm	lm	lm	lm	lm
Marker378243	lmxll	lm	lm	lm	lm	ll	ll	lm	lm	lm	lm	ll	ll	lm	ll	lm	ll	lm	ll	ll	ll	lm	lm	ll	lm	ll	lm	lm	lm	lm	lm	lm	lm	lm	ll	lm	ll	ll	ll	lm	lm	ll	ll	ll	ll	ll	ll	ll	ll
Marker356193	lmxll	lm	lm	lm	lm	ll	ll	lm	lm	lm	lm	ll	ll	lm	ll	lm	ll	lm	ll	ll	ll	lm	lm	ll	lm	ll	lm	lm	lm	lm	lm	lm	lm	lm	ll	lm	ll	ll	ll	lm	lm	ll	ll	ll	ll	ll	ll	ll	ll
Marker82928	lmxll	ll	ll	ll	ll	lm	lm	ll	ll	ll	ll	lm	lm	ll	lm	ll	lm	ll	lm	lm	lm	ll	ll	lm	ll	lm	ll	ll	ll	ll	ll	ll	ll	ll	lm	ll	lm	lm	lm	ll	ll	lm	lm	lm	lm	lm	lm	lm	lm
Marker253011	lmxll	lm	lm	lm	lm	ll	ll	lm	lm	lm	lm	ll	ll	lm	ll	lm	ll	lm	ll	ll	ll	lm	lm	ll	lm	ll	lm	lm	lm	lm	lm	lm	lm	lm	ll	lm	ll	ll	ll	lm	lm	ll	ll	ll	ll	ll	ll	ll	ll
Marker256059	lmxll	ll	ll	ll	ll	lm	lm	ll	ll	ll	ll	lm	lm	ll	lm	ll	lm	ll	lm	lm	lm	ll	ll	lm	ll	lm	ll	ll	ll	ll	ll	ll	ll	ll	lm	ll	lm	lm	lm	ll	ll	lm	lm	lm	lm	lm	lm	lm	lm
Marker202191	lmxll	ll	ll	ll	ll	lm	lm	ll	ll	ll	ll	lm	lm	ll	lm	ll	lm	ll	lm	lm	lm	ll	ll	lm	ll	lm	ll	ll	ll	ll	ll	ll	ll	ll	lm	ll	ll	lm	ll	ll	ll	lm	lm	lm	lm	lm	lm	lm	lm
Marker401232	lmxll	ll	ll	ll	ll	lm	lm	ll	ll	ll	ll	lm	lm	ll	lm	ll	lm	ll	lm	lm	lm	ll	ll	lm	ll	lm	ll	ll	ll	ll	ll	ll	ll	ll	lm	ll	ll	lm	ll	ll	ll	lm	lm	lm	lm	lm	lm	lm	lm
Marker301278	lmxll	ll	ll	ll	ll	lm	lm	ll	ll	ll	ll	lm	lm	ll	lm	ll	lm	ll	lm	lm	lm	ll	ll	lm	ll	lm	ll	ll	ll	ll	ll	ll	ll	ll	lm	ll	ll	lm	ll	ll	ll	lm	lm	lm	lm	lm	lm	lm	lm
Marker407723	lmxll	lm	lm	lm	lm	ll	ll	lm	lm	lm	lm	ll	ll	lm	ll	lm	ll	lm	ll	ll	ll	lm	lm	ll	lm	ll	lm	lm	lm	lm	lm	lm	lm	lm	ll	lm	lm	ll	lm	lm	lm	ll	ll	ll	ll	ll	ll	ll	ll
Marker170063	lmxll	ll	ll	ll	ll	lm	lm	ll	ll	ll	ll	lm	lm	ll	lm	ll	lm	ll	lm	lm	lm	ll	ll	lm	ll	lm	ll	ll	ll	ll	ll	ll	ll	ll	lm	ll	ll	lm	ll	ll	ll	lm	lm	lm	lm	lm	lm	lm	lm
Marker395668	lmxll	ll	ll	ll	ll	lm	lm	ll	ll	ll	ll	lm	lm	ll	lm	ll	lm	ll	lm	lm	lm	ll	ll	lm	ll	lm	ll	ll	ll	ll	ll	ll	ll	ll	lm	ll	ll	lm	ll	ll	ll	lm	lm	lm	lm	lm	lm	lm	lm
Marker100399	lmxll	lm	lm	lm	lm	ll	ll	lm	lm	lm	lm	ll	ll	lm	ll	lm	ll	lm	ll	ll	ll	lm	lm	ll	lm	ll	lm	ll	lm	lm	lm	lm	lm	lm	ll	lm	lm	ll	lm	lm	lm	ll	ll	ll	ll	ll	ll	ll	ll
Marker646600	lmxll	ll	ll	ll	ll	lm	lm	ll	ll	ll	ll	lm	lm	ll	lm	ll	lm	ll	lm	lm	lm	ll	ll	lm	ll	lm	ll	lm	ll	ll	ll	ll	ll	ll	lm	ll	ll	lm	ll	ll	ll	lm	lm	lm	lm	lm	lm	lm	lm
Marker100248	lmxll	lm	lm	lm	lm	ll	ll	lm	lm	lm	lm	ll	ll	lm	ll	lm	ll	lm	ll	ll	ll	lm	lm	ll	lm	ll	lm	ll	lm	lm	lm	lm	lm	lm	ll	lm	lm	ll	lm	lm	lm	ll	ll	ll	ll	ll	ll	ll	ll
Marker397308	nnxnp	nn	np	nn	nn	nn	np	nn	np	nn	nn	np	np	np	np	np	nn	nn	nn	np	np	nn	np	np	nn	nn	nn	nn	nn	np	nn	nn	nn	nn	np	np	np	np	nn	nn	np	np	nn	np	nn	nn	np	np	nn
Marker421201	nnxnp	np	nn	np	np	np	nn	np	nn	np	np	nn	nn	nn	nn	nn	np	np	np	nn	nn	np	nn	nn	np	np	np	np	np	nn	np	np	np	np	nn	nn	nn	nn	np	np	nn	nn	np	nn	np	np	nn	nn	np
Marker98428	nnxnp	nn	np	nn	nn	nn	np	nn	np	nn	nn	np	np	np	np	np	nn	nn	nn	np	np	nn	np	np	nn	nn	nn	nn	nn	np	nn	nn	nn	nn	np	np	np	np	nn	nn	np	np	nn	np	nn	nn	np	np	nn
Marker234185	nnxnp	nn	np	nn	nn	nn	np	nn	np	nn	nn	np	np	np	np	np	nn	nn	nn	np	np	nn	np	np	nn	nn	nn	nn	nn	np	nn	nn	nn	nn	np	np	np	np	nn	nn	np	np	nn	np	nn	nn	np	np	nn
Marker235825	nnxnp	nn	np	nn	nn	nn	np	nn	np	nn	nn	np	np	np	np	np	nn	nn	nn	np	np	nn	np	np	nn	nn	nn	nn	nn	np	nn	nn	nn	nn	np	np	np	np	nn	nn	np	np	nn	np	nn	nn	np	np	nn
Marker330951	nnxnp	nn	np	nn	nn	nn	np	nn	np	nn	nn	np	np	np	np	np	nn	nn	nn	np	np	nn	np	np	nn	nn	nn	nn	nn	np	nn	nn	nn	nn	np	np	np	np	nn	nn	np	np	nn	np	nn	nn	np	np	nn
Marker149701	lmxll	lm	lm	lm	lm	ll	ll	lm	lm	lm	lm	ll	ll	lm	ll	lm	ll	lm	ll	ll	ll	lm	lm	ll	lm	ll	lm	ll	lm	lm	lm	lm	lm	lm	ll	lm	lm	ll	lm	lm	lm	ll	ll	ll	ll	ll	ll	ll	ll
Marker304560	lmxll	ll	ll	ll	ll	lm	lm	ll	ll	ll	ll	lm	lm	ll	lm	ll	lm	ll	lm	lm	lm	ll	ll	lm	ll	lm	ll	lm	ll	ll	ll	ll	ll	ll	lm	ll	ll	lm	ll	ll	ll	lm	lm	lm	lm	lm	lm	lm	lm
Marker639344	lmxll	ll	ll	ll	ll	lm	lm	ll	ll	ll	ll	lm	lm	ll	lm	ll	lm	ll	lm	lm	lm	ll	ll	lm	ll	lm	ll	lm	ll	ll	ll	ll	ll	ll	lm	ll	ll	lm	ll	ll	ll	lm	lm	lm	lm	lm	lm	lm	lm
Marker680921	lmxll	ll	ll	ll	ll	lm	lm	ll	ll	ll	ll	lm	lm	ll	lm	ll	lm	ll	lm	lm	lm	ll	ll	lm	ll	lm	ll	lm	ll	ll	ll	ll	ll	ll	lm	ll	ll	lm	ll	ll	ll	lm	lm	lm	lm	lm	lm	lm	lm
Marker596110	lmxll	ll	ll	ll	ll	lm	lm	ll	ll	ll	ll	lm	lm	ll	lm	ll	lm	ll	lm	lm	lm	ll	ll	lm	ll	lm	ll	lm	ll	ll	ll	ll	ll	ll	lm	ll	ll	lm	ll	ll	ll	lm	lm	lm	lm	lm	lm	lm	lm
Marker409476	lmxll	ll	ll	ll	ll	lm	lm	ll	ll	ll	ll	lm	lm	ll	lm	ll	lm	ll	lm	lm	lm	ll	ll	lm	ll	lm	ll	lm	ll	ll	ll	ll	ll	ll	lm	ll	ll	lm	ll	ll	ll	lm	lm	lm	lm	lm	lm	lm	lm
Marker78769	lmxll	ll	ll	ll	ll	lm	lm	ll	ll	ll	ll	lm	lm	ll	lm	ll	lm	ll	lm	lm	lm	ll	ll	lm	ll	lm	ll	lm	ll	ll	ll	ll	ll	ll	lm	ll	ll	lm	ll	ll	ll	lm	lm	lm	lm	lm	lm	lm	lm
Marker319440	lmxll	ll	ll	ll	ll	lm	lm	ll	ll	ll	ll	lm	lm	ll	lm	ll	lm	ll	lm	lm	lm	ll	ll	lm	ll	lm	ll	lm	ll	ll	ll	ll	ll	ll	lm	ll	ll	lm	ll	ll	ll	lm	lm	lm	lm	lm	lm	lm	lm
Marker363077	lmxll	ll	ll	ll	ll	lm	lm	ll	ll	ll	ll	lm	lm	ll	lm	ll	lm	ll	lm	lm	lm	ll	ll	lm	ll	lm	ll	lm	ll	ll	ll	ll	ll	ll	lm	ll	ll	lm	ll	ll	ll	lm	lm	lm	lm	lm	lm	lm	lm
Marker232690	lmxll	ll	ll	ll	ll	lm	lm	ll	ll	ll	ll	lm	lm	ll	lm	ll	lm	ll	lm	lm	lm	ll	ll	lm	ll	lm	ll	lm	ll	ll	ll	ll	ll	ll	lm	ll	ll	lm	ll	ll	ll	lm	lm	lm	lm	lm	lm	lm	lm
Marker329210	lmxll	ll	ll	ll	ll	lm	lm	ll	ll	ll	ll	lm	lm	ll	lm	ll	lm	ll	lm	lm	lm	ll	ll	lm	ll	lm	ll	lm	ll	ll	ll	ll	ll	ll	lm	ll	ll	lm	ll	ll	ll	lm	lm	lm	lm	lm	lm	lm	lm
Marker208422	lmxll	lm	ll	ll	ll	lm	ll	ll	ll	ll	ll	lm	lm	ll	lm	ll	lm	ll	lm	lm	lm	ll	ll	lm	ll	lm	lm	lm	ll	ll	ll	ll	ll	ll	lm	ll	ll	lm	ll	ll	ll	lm	lm	lm	lm	lm	lm	lm	lm
Marker149777	lmxll	lm	ll	ll	ll	lm	ll	ll	ll	ll	ll	lm	lm	ll	lm	ll	lm	ll	lm	lm	lm	ll	ll	lm	ll	lm	lm	lm	ll	ll	ll	ll	ll	ll	lm	ll	ll	lm	ll	ll	ll	lm	lm	lm	lm	lm	lm	lm	lm
Marker114792	lmxll	lm	ll	ll	ll	lm	ll	ll	ll	ll	ll	lm	lm	ll	lm	ll	lm	ll	lm	lm	lm	ll	ll	lm	ll	lm	lm	lm	ll	ll	ll	ll	ll	ll	lm	ll	ll	lm	ll	ll	ll	lm	lm	lm	lm	lm	lm	lm	lm
Marker172999	nnxnp	np	nn	np	np	np	nn	np	nn	np	np	nn	nn	nn	nn	nn	np	np	nn	nn	nn	np	nn	nn	np	np	np	np	np	nn	np	np	np	np	nn	nn	nn	nn	np	np	nn	np	np	nn	np	np	nn	nn	np
Marker234687	lmxll	lm	ll	ll	ll	lm	ll	ll	ll	ll	ll	lm	lm	ll	lm	ll	lm	ll	lm	lm	lm	ll	ll	lm	lm	lm	lm	lm	ll	ll	ll	ll	ll	ll	lm	ll	ll	lm	ll	lm	ll	lm	lm	lm	lm	lm	lm	lm	lm
Marker500811	lmxll	lm	ll	ll	ll	lm	ll	ll	ll	ll	ll	lm	lm	ll	lm	ll	lm	ll	lm	lm	lm	ll	ll	lm	lm	lm	lm	lm	ll	ll	ll	ll	ll	ll	lm	ll	ll	lm	ll	lm	ll	lm	lm	lm	lm	lm	lm	lm	lm
Marker288895	lmxll	lm	ll	ll	lm	lm	ll	ll	ll	ll	ll	lm	lm	ll	lm	ll	lm	ll	lm	lm	lm	ll	ll	lm	lm	lm	lm	lm	ll	ll	ll	ll	ll	ll	lm	ll	ll	lm	ll	lm	ll	lm	lm	lm	lm	lm	lm	lm	lm
Marker222650	lmxll	lm	ll	ll	lm	lm	lm	ll	ll	ll	ll	lm	lm	ll	lm	ll	lm	ll	lm	lm	lm	ll	ll	lm	lm	lm	lm	lm	ll	ll	ll	ll	ll	ll	lm	ll	ll	lm	ll	lm	ll	lm	lm	lm	lm	lm	lm	lm	lm
Marker269785	lmxll	lm	ll	ll	lm	lm	lm	ll	ll	ll	ll	lm	lm	ll	lm	ll	lm	ll	lm	lm	lm	ll	ll	lm	lm	lm	lm	lm	ll	ll	ll	ll	ll	ll	lm	ll	ll	lm	ll	lm	ll	lm	lm	lm	lm	lm	lm	lm	lm
Marker269047	lmxll	lm	ll	ll	lm	lm	lm	ll	ll	ll	lm	lm	lm	ll	lm	lm	lm	ll	lm	lm	lm	ll	ll	lm	lm	lm	lm	lm	ll	ll	ll	ll	ll	ll	lm	ll	ll	lm	ll	lm	ll	lm	lm	lm	lm	lm	lm	lm	lm
Marker179456	lmxll	ll	lm	lm	ll	ll	ll	lm	lm	lm	ll	ll	ll	lm	ll	ll	ll	lm	ll	ll	ll	lm	lm	ll	ll	ll	ll	ll	lm	lm	lm	lm	lm	lm	ll	lm	lm	ll	lm	ll	lm	ll	ll	ll	ll	ll	ll	ll	ll
Marker189023	lmxll	lm	ll	ll	lm	lm	lm	ll	ll	ll	lm	lm	lm	ll	lm	lm	lm	ll	lm	lm	lm	ll	ll	lm	lm	lm	lm	lm	ll	ll	ll	ll	ll	ll	lm	ll	ll	lm	ll	lm	ll	lm	lm	lm	lm	lm	lm	lm	lm
Marker769810	lmxll	lm	ll	ll	lm	lm	lm	ll	ll	ll	lm	lm	lm	ll	lm	lm	lm	ll	lm	lm	lm	ll	ll	lm	lm	lm	lm	lm	ll	ll	ll	ll	ll	ll	lm	ll	ll	lm	ll	lm	ll	lm	lm	lm	lm	lm	lm	lm	lm
Marker239559	lmxll	ll	lm	lm	ll	ll	ll	lm	lm	lm	ll	ll	ll	lm	ll	ll	ll	lm	ll	ll	ll	lm	lm	ll	ll	ll	ll	ll	lm	lm	lm	lm	lm	lm	ll	lm	lm	ll	lm	ll	lm	ll	ll	ll	ll	ll	ll	ll	ll
Marker159939	lmxll	lm	ll	ll	lm	lm	lm	ll	ll	ll	lm	lm	lm	ll	lm	lm	lm	ll	lm	lm	lm	ll	ll	lm	lm	lm	lm	lm	ll	ll	ll	ll	ll	ll	lm	ll	ll	lm	ll	lm	ll	lm	lm	lm	lm	lm	lm	lm	lm
Marker212360	lmxll	ll	lm	lm	ll	ll	ll	lm	lm	lm	ll	ll	ll	lm	ll	ll	ll	lm	ll	ll	ll	lm	lm	ll	ll	ll	ll	ll	lm	lm	lm	lm	lm	lm	ll	lm	lm	ll	lm	ll	lm	ll	ll	ll	ll	ll	ll	ll	ll
Marker514723	lmxll	lm	ll	ll	lm	lm	lm	ll	ll	ll	lm	lm	lm	ll	lm	lm	lm	lm	lm	lm	lm	ll	ll	lm	lm	lm	lm	lm	ll	ll	ll	ll	ll	ll	lm	ll	ll	lm	ll	ll	ll	lm	lm	lm	lm	lm	lm	lm	lm
Marker160215	lmxll	lm	ll	ll	lm	lm	lm	ll	ll	ll	lm	lm	lm	ll	lm	lm	lm	lm	lm	lm	lm	ll	ll	lm	lm	lm	lm	lm	ll	ll	ll	ll	ll	ll	lm	ll	ll	lm	ll	ll	ll	lm	lm	lm	lm	lm	lm	lm	lm
Marker511469	lmxll	lm	ll	ll	lm	lm	lm	ll	ll	ll	lm	lm	lm	ll	lm	lm	lm	lm	lm	lm	lm	ll	ll	lm	lm	lm	lm	lm	ll	ll	ll	ll	ll	ll	lm	ll	ll	lm	ll	ll	ll	lm	lm	lm	lm	lm	ll	lm	lm
Marker301583	lmxll	lm	ll	ll	lm	lm	lm	ll	ll	ll	ll	lm	lm	ll	lm	lm	lm	lm	lm	lm	lm	ll	ll	lm	lm	lm	lm	lm	ll	ll	ll	ll	ll	ll	lm	ll	ll	lm	ll	ll	ll	lm	lm	lm	lm	lm	ll	lm	lm
Marker396563	lmxll	ll	ll	ll	lm	lm	lm	ll	ll	ll	ll	lm	lm	ll	lm	lm	lm	ll	lm	lm	lm	ll	ll	lm	lm	lm	lm	lm	ll	ll	ll	ll	ll	ll	lm	ll	ll	lm	ll	ll	ll	lm	lm	lm	lm	lm	ll	lm	lm
Marker115306	lmxll	ll	ll	ll	lm	lm	lm	ll	ll	ll	ll	lm	lm	ll	lm	lm	lm	ll	lm	lm	lm	ll	ll	lm	lm	lm	lm	lm	ll	ll	ll	ll	ll	ll	lm	ll	ll	lm	ll	ll	ll	lm	lm	lm	lm	lm	ll	lm	lm
Marker63779	nnxnp	np	nn	np	np	np	np	np	np	np	np	nn	nn	nn	nn	nn	nn	np	nn	nn	nn	np	nn	np	np	np	np	np	nn	nn	np	np	nn	np	nn	nn	np	nn	np	np	nn	nn	np	nn	np	np	nn	nn	np
Marker130980	lmxll	ll	ll	ll	lm	lm	lm	ll	ll	ll	ll	lm	lm	ll	lm	lm	lm	ll	lm	lm	lm	ll	ll	lm	lm	lm	lm	lm	ll	ll	ll	lm	ll	ll	lm	ll	ll	lm	ll	ll	ll	lm	lm	lm	lm	lm	ll	lm	lm
Marker177917	lmxll	ll	ll	ll	lm	lm	lm	ll	ll	ll	ll	lm	lm	ll	lm	lm	lm	ll	lm	lm	lm	ll	ll	lm	lm	lm	lm	lm	ll	ll	ll	lm	ll	ll	lm	ll	ll	lm	ll	ll	ll	lm	lm	lm	lm	lm	ll	lm	lm
Marker117653	lmxll	ll	ll	ll	lm	lm	lm	ll	ll	ll	ll	lm	lm	ll	lm	lm	lm	ll	lm	lm	lm	ll	ll	lm	lm	lm	lm	lm	ll	ll	ll	lm	ll	ll	lm	ll	ll	lm	ll	ll	ll	lm	lm	lm	lm	lm	ll	lm	lm
Marker153744	lmxll	ll	ll	ll	lm	lm	lm	ll	ll	ll	ll	lm	lm	ll	lm	lm	lm	ll	lm	lm	lm	ll	ll	lm	lm	lm	lm	lm	ll	ll	ll	lm	ll	ll	lm	ll	ll	lm	ll	ll	ll	lm	lm	lm	lm	lm	ll	lm	lm
Marker253291	lmxll	lm	ll	ll	lm	lm	lm	ll	ll	ll	ll	lm	lm	ll	lm	lm	lm	lm	lm	lm	lm	ll	ll	lm	lm	lm	lm	lm	ll	ll	ll	lm	ll	ll	lm	ll	ll	lm	ll	ll	ll	lm	lm	lm	lm	lm	ll	lm	lm
Marker125306	lmxll	lm	ll	ll	lm	lm	lm	ll	ll	ll	ll	lm	lm	ll	lm	lm	lm	lm	lm	lm	lm	ll	ll	lm	lm	lm	lm	lm	ll	ll	ll	lm	ll	ll	lm	ll	ll	lm	ll	ll	ll	lm	lm	lm	lm	lm	ll	lm	lm
Marker380528	lmxll	lm	ll	ll	lm	lm	lm	ll	ll	ll	ll	lm	lm	ll	lm	lm	lm	lm	lm	lm	lm	ll	ll	lm	lm	lm	lm	lm	ll	ll	ll	lm	ll	ll	lm	ll	ll	lm	ll	ll	ll	lm	lm	lm	lm	lm	ll	lm	lm
Marker272411	lmxll	lm	lm	lm	lm	lm	lm	lm	ll	lm	lm	lm	lm	ll	lm	lm	ll	lm	ll	lm	lm	lm	ll	lm	ll	lm	lm	ll	ll	ll	lm	ll	ll	ll	ll	lm	lm	lm	lm	lm	ll	lm	lm	lm	lm	lm	lm	lm	lm
Marker536378	lmxll	lm	lm	lm	lm	lm	lm	lm	ll	lm	lm	lm	lm	ll	lm	lm	ll	lm	ll	lm	lm	lm	ll	lm	ll	lm	lm	ll	ll	ll	lm	ll	ll	ll	ll	lm	lm	lm	lm	lm	ll	lm	lm	lm	lm	lm	lm	lm	lm
Marker210840	lmxll	lm	lm	lm	lm	lm	lm	lm	ll	lm	lm	lm	lm	ll	lm	lm	ll	lm	ll	lm	lm	lm	ll	lm	ll	lm	lm	ll	ll	ll	lm	ll	ll	ll	ll	lm	lm	lm	lm	lm	ll	lm	lm	lm	lm	lm	lm	lm	lm
Marker263541	lmxll	ll	ll	ll	ll	ll	ll	ll	lm	ll	ll	ll	ll	lm	ll	ll	lm	ll	lm	ll	ll	ll	lm	ll	lm	ll	ll	lm	lm	lm	ll	lm	lm	lm	lm	ll	ll	ll	ll	ll	lm	ll	ll	ll	ll	ll	ll	ll	ll
Marker454167	nnxnp	nn	np	nn	nn	nn	np	nn	np	nn	np	nn	nn	np	nn	nn	np	nn	nn	nn	nn	nn	np	nn	np	np	nn	np	np	np	np	np	nn	np	np	nn	nn	nn	np	nn	nn	nn	nn	nn	np	nn	nn	nn	nn
Marker457187	nnxnp	np	nn	np	np	np	nn	np	nn	np	nn	np	np	nn	np	np	nn	np	np	np	np	np	nn	np	nn	nn	np	nn	nn	nn	nn	nn	np	nn	nn	np	np	np	nn	np	np	np	np	np	nn	np	np	np	np
Marker137991	nnxnp	nn	np	nn	nn	nn	nn	nn	np	nn	np	nn	nn	np	nn	nn	np	nn	nn	nn	nn	nn	nn	nn	np	np	nn	np	np	np	np	np	nn	np	np	nn	nn	nn	np	nn	nn	nn	nn	nn	np	nn	nn	nn	nn
Marker522481	nnxnp	nn	np	nn	nn	nn	nn	nn	np	nn	np	nn	nn	np	nn	nn	np	nn	np	nn	nn	nn	nn	nn	np	np	nn	np	np	np	np	np	nn	np	np	nn	nn	nn	np	nn	nn	nn	nn	nn	np	nn	nn	nn	nn
Marker403324	lmxll	ll	ll	ll	ll	ll	ll	ll	lm	ll	lm	ll	ll	lm	ll	ll	lm	ll	lm	ll	ll	ll	lm	ll	lm	lm	ll	lm	lm	lm	ll	lm	lm	lm	lm	ll	ll	ll	ll	ll	lm	ll	ll	ll	ll	ll	ll	ll	ll
Marker392230	nnxnp	nn	np	nn	nn	nn	nn	nn	np	nn	np	nn	nn	np	nn	nn	np	nn	np	nn	nn	nn	nn	nn	np	np	nn	np	np	np	np	np	nn	np	np	nn	nn	nn	np	nn	nn	nn	nn	nn	np	nn	nn	nn	nn
Marker252248	nnxnp	nn	np	nn	nn	nn	nn	nn	np	nn	np	nn	nn	np	nn	nn	np	nn	np	nn	nn	nn	nn	nn	np	np	nn	np	np	np	np	np	nn	np	np	nn	nn	nn	np	nn	nn	nn	nn	nn	np	nn	nn	nn	nn
Marker590137	nnxnp	np	nn	np	np	np	np	np	nn	np	nn	np	np	nn	np	np	nn	np	nn	np	np	np	np	np	nn	nn	np	nn	nn	nn	nn	nn	np	nn	nn	np	np	np	nn	np	np	np	np	np	nn	np	np	np	np
Marker183732	hkxhk	hh	hk	hh	hh	hh	hh	hh	hk	hh	kk	hh	hh	kk	hk	hh	kk	hh	kk	hh	hh	hh	hk	hk	kk	kk	hh	kk	kk	kk	hk	kk	hk	kk	kk	hh	hh	hh	hk	hh	hk	hh	hh	hh	hk	hh	hh	hh	hh
Marker169873	nnxnp	nn	np	nn	nn	nn	nn	nn	np	nn	np	nn	nn	np	nn	nn	np	nn	np	nn	nn	nn	nn	nn	np	np	nn	np	np	np	np	np	nn	np	np	nn	nn	nn	np	nn	nn	nn	nn	nn	np	nn	nn	nn	nn
Marker342462	lmxll	lm	lm	lm	lm	lm	lm	lm	lm	lm	ll	lm	lm	ll	ll	lm	ll	lm	ll	lm	lm	lm	ll	ll	ll	ll	lm	ll	ll	ll	lm	ll	ll	ll	ll	lm	lm	lm	lm	lm	ll	lm	lm	lm	lm	lm	lm	lm	lm
Marker508056	lmxll	ll	ll	ll	ll	ll	ll	ll	ll	ll	lm	ll	ll	lm	lm	ll	lm	ll	lm	ll	ll	ll	lm	lm	lm	lm	ll	lm	lm	lm	ll	lm	lm	lm	lm	ll	ll	ll	ll	ll	lm	ll	ll	ll	ll	ll	ll	ll	ll
Marker276828	lmxll	ll	ll	ll	ll	ll	ll	ll	ll	ll	lm	ll	ll	lm	lm	ll	lm	ll	lm	ll	ll	ll	lm	lm	lm	lm	ll	lm	lm	lm	ll	lm	lm	lm	lm	ll	ll	ll	ll	ll	lm	ll	ll	ll	ll	ll	ll	ll	ll
Marker157951	nnxnp	np	nn	np	np	np	np	np	nn	np	nn	np	np	nn	nn	np	nn	np	nn	np	np	np	np	nn	nn	nn	np	nn	nn	nn	nn	nn	np	nn	nn	np	np	np	nn	np	np	np	np	np	nn	np	np	np	np
Marker414582	nnxnp	nn	np	nn	nn	nn	nn	nn	np	nn	np	nn	nn	np	np	nn	np	nn	np	nn	nn	nn	nn	np	np	np	nn	np	np	np	np	np	nn	np	np	nn	nn	nn	np	nn	nn	nn	nn	nn	np	nn	nn	nn	nn
Marker230074	nnxnp	nn	np	nn	nn	nn	nn	nn	np	nn	np	nn	nn	np	np	nn	np	nn	np	nn	nn	nn	nn	np	np	np	nn	np	np	np	np	np	nn	np	np	nn	nn	nn	np	nn	nn	nn	nn	nn	np	nn	nn	nn	nn
Marker351239	nnxnp	nn	np	nn	nn	nn	np	nn	np	nn	np	nn	nn	np	np	nn	np	nn	np	nn	nn	nn	nn	np	np	np	nn	np	np	np	np	np	nn	np	np	nn	nn	nn	np	nn	nn	nn	nn	nn	np	nn	nn	np	nn
Marker129061	nnxnp	np	nn	np	np	np	nn	np	nn	np	nn	np	np	nn	nn	np	nn	np	nn	np	np	np	np	nn	nn	nn	np	nn	nn	nn	nn	nn	np	nn	nn	np	np	np	nn	np	np	np	np	np	nn	np	np	nn	np
Marker250962	nnxnp	nn	np	nn	nn	nn	np	nn	np	nn	np	nn	nn	np	np	nn	np	nn	np	nn	nn	nn	nn	np	np	np	nn	np	np	np	np	np	nn	np	np	nn	nn	nn	np	nn	nn	nn	nn	nn	np	nn	nn	np	nn
Marker313714	nnxnp	nn	np	nn	nn	nn	np	nn	np	nn	np	nn	nn	np	np	nn	np	nn	np	nn	nn	nn	nn	np	np	np	nn	np	np	np	np	np	nn	np	np	nn	nn	nn	np	nn	nn	nn	nn	nn	np	nn	np	np	nn
Marker534919	nnxnp	nn	np	nn	nn	nn	np	nn	np	nn	np	nn	nn	np	np	nn	np	nn	np	nn	nn	nn	nn	np	np	np	nn	np	np	np	np	np	nn	np	np	nn	nn	nn	np	nn	nn	nn	nn	nn	np	nn	np	np	nn
Marker147693	nnxnp	np	nn	np	np	np	nn	np	nn	np	nn	np	np	nn	nn	np	nn	np	nn	np	np	np	np	nn	nn	nn	np	nn	nn	nn	nn	nn	np	nn	nn	np	np	np	nn	np	np	np	np	np	nn	np	nn	nn	np
Marker351511	nnxnp	np	nn	np	np	np	nn	np	nn	np	nn	np	np	nn	nn	np	nn	np	nn	np	np	np	np	nn	nn	nn	np	nn	nn	nn	nn	nn	np	nn	nn	np	np	np	nn	np	np	np	np	np	nn	np	nn	nn	np
Marker233467	nnxnp	nn	np	nn	nn	nn	np	nn	np	nn	np	nn	nn	np	np	nn	np	nn	np	nn	nn	nn	nn	np	np	np	nn	np	np	np	np	np	nn	np	np	nn	nn	nn	np	nn	nn	nn	nn	nn	np	nn	np	np	nn
Marker157398	nnxnp	np	nn	np	np	np	nn	np	nn	np	nn	np	np	nn	nn	np	nn	np	np	nn	np	np	np	nn	nn	nn	np	nn	nn	nn	nn	nn	np	nn	nn	np	np	np	nn	np	np	np	np	np	nn	np	nn	nn	np
Marker129828	nnxnp	nn	np	nn	nn	nn	np	nn	np	nn	np	nn	nn	np	np	nn	np	nn	nn	np	nn	nn	nn	np	np	np	nn	np	np	np	np	np	nn	np	np	nn	nn	nn	np	nn	nn	nn	nn	nn	np	nn	np	np	nn
Marker93677	nnxnp	nn	np	nn	nn	nn	np	nn	np	nn	np	nn	nn	np	np	nn	np	nn	nn	np	nn	nn	nn	np	np	np	nn	np	np	np	np	np	nn	np	np	nn	nn	nn	np	nn	nn	nn	nn	nn	np	nn	np	np	nn
Marker246194	nnxnp	nn	np	nn	nn	nn	np	nn	np	nn	np	nn	nn	np	np	nn	np	nn	nn	np	nn	nn	nn	np	np	np	nn	np	np	np	np	np	nn	np	np	nn	nn	nn	np	nn	nn	nn	nn	nn	np	nn	np	np	nn
Marker379953	hkxhk	hh	hk	hh	hh	hh	hk	hh	hk	hh	hk	hh	hh	kk	kk	hh	kk	hh	hh	hk	hh	hh	hk	kk	kk	kk	hh	kk	kk	kk	hk	kk	hk	kk	kk	hh	hh	hh	hk	hh	hk	hh	hh	hh	hk	hh	hk	hk	hh
Marker209377	nnxnp	np	nn	np	np	np	nn	np	nn	np	nn	np	np	nn	nn	np	nn	np	np	nn	np	np	np	nn	nn	nn	np	nn	nn	nn	nn	nn	np	nn	nn	np	np	np	nn	np	np	np	np	np	nn	np	nn	nn	np
Marker367726	nnxnp	nn	np	nn	nn	nn	np	nn	np	nn	np	nn	nn	np	np	nn	np	nn	nn	np	nn	nn	nn	np	np	np	nn	np	np	np	np	np	nn	np	np	nn	nn	nn	np	nn	nn	nn	nn	nn	np	nn	np	np	nn
Marker343197	nnxnp	nn	np	nn	nn	nn	np	nn	nn	nn	np	nn	nn	np	np	nn	np	nn	nn	np	nn	nn	nn	np	np	np	nn	np	np	np	np	np	nn	np	np	nn	nn	nn	np	nn	nn	nn	nn	nn	np	nn	np	np	nn
Marker399205	nnxnp	np	nn	np	np	np	nn	np	np	np	nn	np	np	nn	nn	np	nn	np	np	nn	np	np	np	nn	nn	nn	np	nn	nn	nn	nn	nn	np	nn	nn	np	np	np	nn	np	np	np	np	np	nn	np	nn	nn	np
Marker137313	nnxnp	nn	np	nn	nn	nn	np	nn	nn	nn	np	nn	nn	np	np	nn	np	nn	nn	np	nn	nn	nn	np	np	np	nn	np	np	np	np	np	nn	np	np	nn	nn	nn	np	nn	nn	nn	nn	nn	np	nn	np	np	nn
Marker362353	nnxnp	nn	np	nn	nn	nn	np	nn	nn	nn	np	nn	nn	np	np	nn	np	nn	nn	np	nn	nn	nn	np	np	np	nn	np	np	np	np	np	nn	np	np	nn	nn	nn	np	nn	nn	nn	nn	nn	np	nn	np	np	nn
Marker305707	nnxnp	nn	np	nn	nn	nn	np	nn	nn	nn	np	nn	nn	np	np	nn	np	nn	nn	np	nn	nn	nn	np	np	np	nn	np	np	np	np	np	nn	np	np	nn	nn	nn	np	nn	nn	nn	nn	nn	np	nn	np	np	nn
Marker54579	nnxnp	nn	np	nn	nn	nn	np	nn	nn	nn	np	nn	nn	np	np	nn	np	nn	nn	np	nn	nn	nn	np	np	np	nn	np	np	np	np	np	nn	np	np	nn	nn	nn	np	nn	nn	nn	nn	nn	np	nn	np	np	nn
Marker340041	nnxnp	np	nn	np	np	np	nn	np	np	np	nn	np	np	nn	nn	np	nn	np	np	nn	np	np	np	nn	nn	nn	np	nn	nn	nn	nn	nn	np	nn	nn	np	np	np	nn	np	np	np	np	np	nn	np	nn	nn	np
Marker378406	lmxll	ll	lm	ll	ll	ll	ll	ll	ll	ll	ll	ll	ll	lm	lm	ll	lm	ll	ll	ll	ll	ll	lm	lm	lm	lm	ll	lm	lm	lm	lm	lm	lm	lm	lm	ll	ll	ll	ll	ll	lm	ll	ll	ll	lm	ll	ll	ll	ll
Marker417226	lmxll	ll	lm	ll	ll	ll	ll	ll	ll	ll	ll	ll	ll	lm	lm	ll	lm	ll	ll	ll	ll	ll	lm	lm	lm	lm	ll	lm	lm	lm	lm	lm	lm	lm	lm	ll	ll	ll	ll	ll	lm	ll	ll	ll	lm	ll	ll	ll	ll
Marker541059	lmxll	lm	ll	lm	lm	lm	lm	lm	lm	lm	lm	lm	lm	ll	ll	lm	ll	lm	lm	lm	lm	lm	ll	ll	ll	ll	lm	ll	ll	ll	ll	ll	ll	ll	ll	lm	lm	lm	lm	lm	ll	lm	lm	lm	ll	lm	lm	lm	lm
Marker593693	lmxll	lm	ll	lm	lm	lm	lm	lm	lm	lm	lm	lm	lm	ll	ll	lm	ll	lm	lm	lm	lm	lm	ll	ll	ll	ll	lm	ll	ll	ll	ll	ll	ll	ll	ll	lm	lm	lm	lm	lm	ll	lm	lm	lm	ll	lm	lm	lm	lm
Marker205299	nnxnp	np	nn	np	np	np	nn	np	np	np	nn	np	np	nn	nn	np	nn	np	np	nn	np	np	np	nn	nn	nn	np	nn	nn	nn	nn	nn	np	nn	nn	np	np	np	nn	np	np	np	nn	np	nn	np	nn	nn	np
Marker156623	nnxnp	nn	np	nn	nn	nn	np	nn	nn	nn	np	nn	nn	np	np	nn	np	nn	nn	np	nn	nn	nn	np	np	np	nn	np	np	np	np	np	nn	np	np	nn	nn	nn	np	nn	np	nn	np	nn	np	nn	np	np	nn
Marker328349	nnxnp	np	nn	np	np	np	nn	np	np	np	nn	np	np	nn	nn	np	nn	np	np	nn	np	np	np	nn	nn	nn	np	nn	nn	nn	nn	nn	np	nn	nn	np	np	np	nn	np	nn	np	nn	np	nn	np	nn	nn	nn
Marker428691	nnxnp	nn	np	nn	nn	nn	np	nn	nn	nn	np	nn	nn	np	np	nn	np	nn	nn	np	nn	nn	nn	np	np	np	nn	np	np	np	np	np	nn	np	np	nn	nn	nn	np	nn	np	nn	np	nn	np	nn	np	np	np
Marker108258	nnxnp	np	nn	np	np	np	nn	np	np	np	nn	np	np	nn	nn	np	nn	np	np	nn	np	np	np	nn	nn	nn	np	nn	nn	nn	nn	nn	np	nn	nn	np	np	np	nn	np	nn	np	nn	np	nn	np	nn	nn	nn
Marker349198	nnxnp	np	nn	np	np	np	nn	np	np	np	nn	np	np	nn	nn	np	nn	np	np	nn	np	np	np	nn	nn	nn	np	nn	nn	nn	nn	nn	np	nn	nn	np	np	np	nn	np	nn	np	nn	np	nn	np	nn	nn	nn
Marker302215	lmxll	lm	ll	lm	lm	lm	lm	lm	lm	lm	lm	ll	lm	ll	ll	lm	ll	lm	lm	ll	ll	lm	ll	ll	ll	ll	lm	ll	ll	ll	ll	ll	ll	ll	ll	lm	lm	lm	lm	lm	ll	lm	lm	lm	ll	lm	lm	lm	lm
Marker648750	lmxll	lm	ll	lm	lm	lm	lm	lm	lm	lm	lm	ll	lm	ll	ll	lm	ll	lm	lm	ll	ll	lm	ll	ll	ll	ll	lm	ll	ll	ll	ll	ll	ll	ll	ll	lm	lm	lm	lm	lm	ll	lm	lm	lm	ll	lm	lm	lm	lm
Marker208819	lmxll	lm	ll	lm	lm	lm	lm	lm	lm	lm	lm	ll	lm	ll	ll	lm	ll	lm	lm	ll	ll	lm	ll	ll	ll	ll	lm	ll	ll	ll	ll	ll	ll	ll	ll	lm	lm	lm	lm	lm	ll	lm	lm	lm	ll	lm	lm	lm	lm
Marker556787	lmxll	ll	lm	ll	ll	ll	ll	ll	ll	ll	ll	lm	ll	lm	lm	ll	lm	ll	ll	lm	lm	ll	lm	lm	lm	lm	ll	lm	lm	lm	lm	lm	lm	lm	lm	ll	ll	ll	lm	ll	lm	ll	ll	ll	lm	ll	ll	ll	ll
Marker156217	lmxll	ll	lm	ll	ll	ll	ll	ll	ll	ll	ll	lm	ll	lm	lm	ll	lm	ll	ll	lm	lm	ll	lm	lm	lm	lm	ll	lm	lm	lm	lm	lm	lm	lm	lm	ll	ll	ll	lm	ll	lm	ll	ll	ll	lm	ll	ll	ll	ll
Marker266294	lmxll	lm	ll	lm	lm	lm	lm	lm	lm	lm	lm	ll	lm	ll	ll	lm	ll	lm	lm	ll	ll	lm	ll	ll	ll	ll	lm	ll	ll	ll	ll	ll	ll	ll	ll	lm	lm	lm	ll	lm	ll	lm	lm	lm	ll	lm	lm	lm	lm
Marker116991	lmxll	lm	ll	lm	lm	lm	lm	lm	lm	lm	lm	ll	lm	ll	ll	lm	ll	lm	lm	ll	ll	lm	ll	ll	ll	ll	lm	ll	ll	ll	ll	ll	ll	ll	ll	lm	lm	lm	ll	lm	ll	lm	lm	lm	ll	lm	lm	lm	lm
Marker465970	lmxll	ll	lm	ll	ll	ll	ll	ll	ll	ll	ll	lm	ll	lm	lm	ll	lm	ll	ll	lm	lm	ll	lm	lm	lm	lm	ll	lm	lm	lm	lm	lm	lm	lm	lm	ll	ll	ll	lm	ll	lm	ll	ll	ll	lm	ll	ll	ll	ll
Marker459383	hkxhk	kk	hh	kk	kk	kk	hk	kk	kk	kk	hk	hk	kk	hh	hh	kk	hh	kk	kk	hh	hh	kk	hk	hh	hh	hh	kk	hh	hh	hh	hh	hh	hk	hh	hh	kk	kk	kk	hh	kk	hh	kk	hk	kk	hh	kk	hk	hk	hk
Marker165007	nnxnp	np	nn	np	np	np	nn	np	np	np	nn	np	np	nn	nn	np	nn	np	np	nn	nn	np	np	nn	nn	nn	np	nn	nn	nn	nn	nn	np	nn	nn	np	np	np	nn	np	nn	np	nn	np	nn	np	nn	nn	nn
Marker355918	nnxnp	np	nn	np	np	np	nn	np	np	np	nn	np	np	nn	nn	np	nn	np	np	nn	nn	np	np	nn	nn	nn	np	nn	nn	nn	nn	nn	np	nn	nn	np	np	np	nn	np	nn	np	nn	np	nn	np	nn	nn	nn
Marker510948	nnxnp	np	nn	np	np	np	nn	np	np	np	nn	np	np	nn	nn	np	nn	np	np	nn	nn	np	np	nn	nn	nn	np	nn	nn	nn	nn	nn	np	nn	nn	np	np	np	nn	np	nn	np	nn	np	nn	np	nn	nn	nn
Marker127911	lmxll	lm	ll	lm	lm	lm	lm	lm	lm	lm	ll	ll	lm	ll	ll	lm	ll	lm	lm	ll	ll	lm	ll	ll	ll	ll	lm	ll	ll	ll	ll	ll	ll	ll	ll	lm	lm	lm	ll	lm	ll	lm	lm	lm	ll	lm	lm	lm	lm
Marker369634	lmxll	ll	lm	ll	ll	ll	ll	ll	ll	ll	lm	lm	ll	lm	lm	ll	lm	ll	ll	lm	lm	ll	lm	lm	lm	lm	ll	lm	lm	lm	lm	lm	lm	lm	lm	ll	ll	ll	lm	ll	lm	ll	ll	ll	lm	ll	ll	ll	ll
Marker144665	lmxll	ll	lm	ll	ll	ll	ll	ll	ll	ll	lm	lm	ll	lm	lm	ll	lm	ll	ll	lm	lm	ll	lm	lm	lm	lm	ll	lm	lm	lm	lm	lm	lm	lm	lm	ll	ll	ll	lm	ll	lm	ll	ll	ll	lm	ll	ll	ll	ll
Marker78548	lmxll	ll	lm	ll	ll	ll	ll	ll	ll	ll	lm	lm	ll	lm	lm	ll	lm	ll	ll	lm	lm	ll	lm	lm	lm	lm	ll	lm	lm	lm	lm	lm	lm	lm	lm	ll	ll	ll	lm	ll	lm	ll	ll	ll	lm	ll	ll	ll	ll
Marker643529	lmxll	lm	ll	lm	lm	lm	lm	lm	lm	lm	ll	ll	lm	ll	ll	lm	ll	lm	lm	ll	ll	lm	ll	ll	ll	ll	lm	ll	ll	ll	ll	ll	ll	ll	ll	lm	lm	lm	ll	lm	ll	lm	lm	lm	ll	lm	lm	lm	lm
Marker431201	nnxnp	nn	np	nn	nn	nn	np	nn	nn	nn	np	nn	nn	np	np	nn	np	nn	nn	np	np	nn	np	np	np	np	nn	np	np	np	np	np	np	np	np	nn	np	nn	np	nn	np	nn	np	nn	np	nn	np	np	nn
Marker623555	nnxnp	np	nn	np	np	np	nn	np	np	np	nn	np	np	nn	nn	np	nn	np	np	nn	nn	np	nn	nn	nn	nn	np	nn	nn	nn	nn	nn	nn	nn	nn	np	nn	np	nn	np	nn	np	nn	np	nn	np	nn	nn	np
Marker244728	nnxnp	np	nn	np	np	np	nn	np	np	np	nn	np	np	nn	nn	np	nn	np	np	nn	nn	np	nn	nn	nn	nn	np	nn	nn	nn	nn	nn	nn	nn	nn	np	nn	np	nn	np	nn	np	nn	np	nn	np	nn	nn	np
Marker359762	hkxhk	kk	hh	kk	kk	kk	hk	kk	kk	kk	hh	hk	kk	hh	hh	kk	hh	kk	kk	hh	hh	kk	hh	hh	hh	hh	kk	hh	hh	hh	hh	hh	hh	hh	hh	kk	kk	kk	hh	kk	hh	kk	hk	kk	hh	kk	hk	hk	kk
Marker100411	nnxnp	nn	np	nn	nn	nn	np	nn	nn	nn	np	nn	nn	np	np	nn	np	nn	nn	np	np	nn	np	np	np	np	nn	np	np	np	np	np	np	np	np	nn	nn	nn	np	nn	np	nn	np	nn	np	nn	np	np	nn
Marker218508	nnxnp	nn	np	nn	nn	nn	np	nn	nn	nn	np	nn	nn	np	np	nn	np	nn	nn	np	np	nn	np	np	np	np	nn	np	np	np	np	np	np	np	np	nn	nn	nn	np	nn	np	nn	np	nn	np	nn	np	np	nn
Marker362139	lmxll	lm	ll	lm	lm	lm	ll	lm	lm	lm	ll	ll	lm	ll	ll	lm	ll	lm	lm	ll	ll	lm	ll	ll	ll	ll	lm	ll	ll	ll	ll	ll	ll	ll	ll	lm	lm	lm	ll	lm	ll	lm	lm	lm	ll	lm	lm	lm	lm
Marker93096	lmxll	lm	ll	lm	lm	lm	ll	lm	lm	lm	ll	ll	lm	ll	ll	lm	ll	lm	lm	ll	ll	lm	ll	lm	ll	ll	lm	ll	ll	ll	ll	ll	ll	ll	ll	lm	lm	lm	ll	lm	ll	lm	lm	lm	ll	lm	lm	lm	lm
Marker175192	lmxll	ll	lm	ll	ll	ll	lm	ll	ll	ll	lm	lm	ll	lm	lm	ll	lm	ll	ll	lm	lm	ll	lm	ll	lm	lm	ll	lm	lm	lm	lm	lm	lm	lm	lm	ll	ll	ll	lm	ll	lm	ll	ll	ll	lm	ll	ll	ll	ll
Marker347966	lmxll	ll	lm	ll	ll	ll	lm	ll	ll	ll	lm	lm	ll	lm	lm	ll	lm	ll	ll	lm	lm	ll	lm	ll	lm	lm	ll	lm	lm	lm	lm	lm	lm	lm	lm	ll	ll	ll	lm	ll	lm	ll	ll	ll	lm	ll	ll	ll	ll
Marker296826	lmxll	ll	lm	ll	ll	ll	lm	ll	ll	ll	lm	lm	ll	lm	lm	ll	lm	ll	ll	lm	lm	ll	lm	ll	lm	lm	ll	lm	lm	lm	lm	lm	lm	lm	lm	ll	ll	ll	lm	ll	lm	ll	ll	ll	lm	ll	ll	ll	ll
Marker411385	nnxnp	np	nn	np	np	np	nn	np	np	np	nn	np	np	nn	nn	np	nn	np	np	nn	nn	np	nn	nn	nn	nn	np	nn	nn	nn	nn	nn	nn	nn	nn	np	nn	np	nn	np	nn	np	nn	np	nn	np	nn	nn	np
Marker222299	nnxnp	nn	np	nn	nn	nn	np	nn	nn	nn	np	nn	nn	np	np	nn	np	nn	nn	np	np	nn	np	np	np	np	nn	np	np	np	np	np	np	np	np	nn	np	nn	np	nn	np	nn	np	nn	np	nn	np	np	nn
Marker142864	nnxnp	np	nn	np	np	np	nn	np	np	np	nn	np	np	nn	nn	np	nn	np	np	nn	nn	np	nn	nn	nn	nn	np	nn	nn	nn	nn	nn	nn	nn	nn	np	nn	np	nn	np	nn	np	nn	np	nn	np	nn	nn	np
Marker87651	nnxnp	nn	np	nn	nn	nn	np	nn	nn	nn	np	nn	nn	np	np	nn	np	nn	nn	np	np	nn	np	np	np	np	nn	np	np	np	np	np	np	np	np	nn	np	nn	np	nn	np	nn	np	nn	np	nn	np	np	nn
Marker173070	nnxnp	np	nn	np	np	np	nn	np	np	np	nn	np	np	nn	nn	np	nn	np	np	nn	nn	np	nn	nn	nn	nn	np	nn	nn	nn	nn	nn	nn	nn	nn	np	nn	np	nn	np	nn	np	nn	np	nn	np	nn	nn	np
Marker456855	hkxhk	kk	hh	kk	kk	kk	hh	kk	kk	kk	hh	hk	kk	hh	hh	kk	hk	kk	kk	hh	hh	kk	hh	hk	hh	hh	kk	hh	hh	hh	hh	hh	hh	hh	hh	kk	hh	kk	hh	kk	hh	kk	hk	kk	hh	kk	hk	hk	kk
Marker230890	nnxnp	nn	np	nn	nn	nn	np	nn	nn	nn	np	nn	nn	np	np	nn	np	nn	nn	np	np	nn	np	nn	np	np	nn	np	np	np	np	np	np	np	np	nn	np	nn	np	nn	np	nn	np	nn	np	nn	np	np	nn
Marker364280	nnxnp	nn	np	nn	nn	nn	np	nn	nn	nn	np	nn	nn	np	np	nn	np	nn	nn	np	np	nn	np	nn	np	np	nn	np	np	np	np	np	np	np	np	nn	np	nn	np	nn	np	nn	np	nn	np	nn	np	np	nn
Marker156340	lmxll	ll	lm	ll	ll	ll	lm	ll	ll	ll	lm	lm	ll	lm	lm	ll	ll	ll	ll	lm	lm	ll	lm	ll	lm	lm	ll	lm	lm	lm	lm	lm	lm	lm	lm	ll	lm	ll	lm	ll	lm	ll	ll	ll	lm	ll	ll	ll	ll
Marker402615	lmxll	lm	ll	lm	lm	lm	ll	lm	lm	lm	ll	ll	lm	ll	ll	lm	lm	lm	lm	ll	ll	lm	ll	lm	ll	ll	lm	ll	ll	ll	ll	ll	ll	ll	ll	lm	ll	lm	ll	lm	ll	lm	lm	lm	ll	lm	lm	lm	lm
Marker413334	lmxll	lm	ll	lm	lm	lm	ll	lm	lm	lm	ll	ll	lm	ll	ll	lm	lm	lm	lm	ll	ll	lm	ll	lm	ll	ll	lm	ll	ll	ll	ll	ll	ll	ll	ll	lm	ll	lm	ll	lm	ll	lm	lm	lm	ll	lm	lm	lm	lm
Marker122261	lmxll	ll	lm	ll	ll	ll	lm	ll	ll	ll	lm	lm	ll	lm	lm	ll	ll	ll	ll	lm	lm	ll	lm	ll	lm	lm	ll	lm	lm	lm	lm	lm	lm	lm	lm	ll	lm	ll	lm	ll	lm	ll	ll	ll	lm	ll	ll	ll	ll
Marker651569	lmxll	lm	ll	lm	lm	lm	ll	lm	lm	lm	ll	ll	lm	ll	ll	lm	lm	lm	lm	ll	ll	lm	ll	lm	ll	ll	lm	ll	ll	ll	ll	ll	ll	ll	ll	lm	ll	lm	ll	lm	ll	lm	lm	lm	ll	lm	lm	lm	lm
Marker297787	nnxnp	nn	np	nn	nn	nn	np	nn	nn	nn	np	nn	nn	np	np	nn	np	nn	nn	np	np	nn	np	nn	np	np	nn	np	np	np	np	np	np	np	np	nn	np	nn	np	nn	np	nn	np	nn	np	nn	np	np	nn
Marker347270	nnxnp	np	nn	np	np	np	nn	np	np	np	nn	np	np	nn	nn	np	nn	np	np	nn	nn	np	nn	np	nn	nn	np	nn	nn	nn	nn	nn	nn	nn	nn	np	nn	np	nn	np	nn	np	nn	np	nn	np	nn	nn	np
Marker209180	nnxnp	np	nn	np	np	np	nn	np	np	np	nn	np	np	nn	nn	np	nn	np	np	nn	nn	np	nn	np	nn	nn	np	nn	nn	nn	nn	nn	nn	nn	nn	np	nn	np	nn	np	nn	np	nn	np	nn	np	nn	nn	np
Marker533368	nnxnp	np	nn	np	np	np	nn	np	np	np	nn	np	np	nn	nn	np	nn	np	np	nn	nn	np	nn	np	nn	nn	np	nn	nn	nn	nn	nn	nn	nn	nn	np	nn	np	nn	np	nn	np	nn	np	nn	np	nn	nn	np
Marker33892	nnxnp	nn	np	nn	nn	nn	np	nn	nn	nn	np	nn	nn	np	np	nn	np	nn	nn	np	np	nn	np	nn	np	np	nn	np	np	np	np	np	np	np	np	nn	np	nn	np	nn	np	nn	np	nn	np	nn	np	np	nn
Marker383093	nnxnp	nn	np	nn	nn	nn	np	nn	nn	nn	np	nn	nn	np	np	nn	np	nn	nn	np	np	nn	np	nn	np	np	nn	np	np	np	np	np	np	np	np	nn	np	nn	np	nn	np	nn	nn	nn	np	nn	np	np	nn
Marker511189	nnxnp	np	nn	np	np	np	nn	np	np	np	nn	np	np	nn	nn	np	nn	np	np	nn	nn	np	nn	np	nn	nn	np	nn	nn	nn	nn	nn	nn	nn	nn	np	nn	np	nn	np	nn	np	np	np	nn	np	nn	nn	np
Marker186590	nnxnp	np	nn	np	np	np	nn	np	np	np	nn	np	np	nn	nn	np	nn	np	np	nn	nn	np	nn	np	nn	nn	np	nn	nn	nn	nn	nn	nn	nn	nn	np	nn	np	nn	np	nn	np	np	np	nn	np	nn	nn	np
Marker250581	nnxnp	np	nn	np	np	np	nn	np	np	np	nn	np	np	nn	nn	np	nn	np	np	nn	nn	np	nn	np	nn	nn	np	nn	nn	nn	nn	nn	nn	nn	nn	np	nn	np	nn	np	nn	np	np	np	nn	np	nn	nn	np
Marker389046	hkxhk	kk	hh	kk	kk	kk	hh	kk	kk	kk	hh	hk	kk	hh	hh	kk	hk	kk	kk	hh	hk	kk	hh	kk	hh	hh	kk	hh	hh	hh	hh	hh	hh	hh	hh	kk	hh	kk	hh	kk	hh	kk	hk	kk	hk	kk	hk	hk	kk
Marker296228	lmxll	ll	lm	ll	ll	ll	lm	ll	ll	ll	lm	lm	ll	lm	lm	ll	ll	ll	ll	lm	ll	ll	lm	ll	lm	lm	ll	lm	lm	lm	lm	lm	lm	lm	lm	lm	lm	ll	lm	ll	lm	ll	lm	ll	ll	ll	lm	ll	ll
Marker160242	lmxll	lm	ll	lm	lm	lm	ll	lm	lm	lm	ll	ll	lm	ll	ll	lm	lm	lm	lm	ll	lm	lm	ll	lm	ll	ll	lm	ll	ll	ll	ll	ll	ll	ll	ll	ll	ll	lm	ll	lm	ll	lm	ll	lm	lm	lm	ll	lm	lm
Marker285936	lmxll	lm	ll	lm	lm	lm	ll	lm	lm	lm	ll	ll	lm	ll	ll	lm	lm	lm	lm	ll	lm	lm	ll	lm	ll	ll	lm	ll	ll	ll	ll	ll	ll	ll	ll	lm	ll	lm	ll	lm	ll	lm	ll	lm	lm	lm	ll	lm	lm
Marker108865	lmxll	ll	lm	ll	ll	ll	lm	ll	ll	ll	lm	lm	ll	lm	lm	ll	ll	ll	ll	lm	ll	ll	lm	ll	lm	lm	ll	lm	lm	lm	lm	lm	lm	lm	lm	ll	lm	ll	lm	ll	lm	ll	lm	ll	ll	ll	lm	ll	ll
Marker341308	efxeg	fg	ee	fg	fg	fg	ee	fg	fg	fg	ee	eg	fg	ee	ee	fg	ef	fg	fg	ee	ef	fg	ee	fg	ee	ee	fg	ee	ee	ee	ee	ee	ee	ee	ee	fg	ee	fg	ee	fg	ee	fg	eg	fg	ef	fg	ee	ef	fg
Marker486361	nnxnp	nn	np	nn	nn	nn	np	nn	nn	nn	np	nn	nn	np	np	nn	np	nn	nn	np	np	nn	np	nn	np	np	nn	np	np	np	np	np	np	np	np	nn	np	nn	np	nn	np	nn	nn	nn	np	nn	np	np	nn
Marker446927	nnxnp	np	nn	np	np	np	nn	np	np	np	nn	np	np	nn	nn	np	nn	np	np	nn	nn	np	nn	np	nn	nn	np	nn	nn	nn	nn	nn	nn	nn	nn	np	nn	np	nn	np	nn	np	np	np	nn	np	nn	nn	np
Marker278215	nnxnp	np	nn	np	np	np	nn	np	np	np	nn	np	np	nn	nn	np	nn	np	np	nn	nn	np	nn	np	nn	nn	np	nn	nn	nn	nn	nn	nn	nn	nn	np	nn	np	nn	np	nn	np	np	np	nn	np	nn	nn	np
Marker95400	nnxnp	nn	np	nn	nn	nn	np	nn	nn	nn	np	nn	nn	np	np	nn	np	nn	nn	np	np	nn	np	nn	np	np	nn	np	np	np	np	np	np	np	np	nn	np	nn	np	nn	np	nn	nn	nn	np	nn	np	np	nn
Marker224411	nnxnp	np	nn	np	np	np	nn	np	np	np	nn	np	np	nn	nn	np	nn	np	np	nn	nn	np	nn	np	nn	nn	np	nn	nn	nn	nn	nn	nn	nn	nn	np	nn	np	nn	np	nn	np	np	np	nn	np	nn	nn	np
Marker239618	nnxnp	nn	np	nn	nn	nn	np	nn	nn	nn	np	nn	nn	np	np	nn	np	nn	nn	np	np	nn	np	nn	np	np	nn	np	np	np	np	np	np	np	np	nn	np	nn	np	nn	np	nn	nn	nn	np	nn	np	np	nn
Marker258700	lmxll	ll	lm	ll	ll	ll	lm	ll	ll	ll	lm	lm	ll	lm	lm	ll	ll	ll	ll	lm	ll	ll	lm	ll	lm	lm	ll	lm	lm	lm	lm	lm	lm	lm	lm	lm	lm	ll	lm	ll	lm	ll	lm	ll	ll	ll	lm	ll	ll
Marker106449	lmxll	ll	lm	ll	ll	ll	lm	ll	ll	ll	lm	lm	ll	lm	lm	ll	ll	ll	ll	lm	ll	ll	lm	ll	lm	lm	ll	lm	lm	lm	lm	lm	lm	lm	lm	lm	lm	ll	lm	ll	lm	ll	lm	ll	ll	ll	lm	ll	ll
Marker429965	lmxll	ll	lm	ll	ll	ll	lm	ll	ll	ll	lm	lm	ll	lm	lm	ll	ll	ll	ll	lm	ll	ll	lm	ll	lm	lm	ll	lm	lm	lm	lm	lm	lm	lm	lm	lm	lm	ll	lm	ll	lm	ll	lm	ll	ll	ll	lm	ll	ll
Marker160016	lmxll	ll	lm	ll	ll	ll	lm	ll	ll	ll	lm	lm	ll	lm	lm	ll	ll	ll	ll	lm	ll	ll	lm	ll	lm	lm	ll	lm	lm	lm	lm	lm	lm	lm	lm	lm	lm	ll	lm	ll	lm	ll	lm	ll	ll	ll	lm	ll	ll
Marker223491	lmxll	ll	lm	ll	ll	ll	lm	ll	ll	ll	lm	lm	ll	lm	lm	ll	ll	ll	ll	lm	ll	ll	lm	ll	lm	lm	ll	lm	lm	lm	lm	lm	lm	lm	lm	lm	ll	ll	lm	ll	lm	ll	lm	ll	ll	ll	lm	ll	ll
Marker365960	lmxll	ll	lm	ll	ll	ll	lm	ll	ll	ll	lm	lm	ll	lm	lm	ll	ll	ll	ll	lm	ll	ll	lm	ll	lm	lm	ll	lm	lm	lm	lm	lm	lm	lm	lm	lm	ll	ll	lm	ll	lm	ll	lm	ll	ll	ll	lm	ll	ll
Marker18697	lmxll	ll	lm	ll	ll	ll	lm	ll	ll	ll	lm	lm	ll	lm	lm	ll	ll	ll	ll	ll	ll	ll	ll	ll	lm	lm	ll	lm	lm	lm	lm	lm	lm	lm	lm	lm	ll	ll	lm	ll	ll	ll	lm	ll	ll	ll	lm	ll	ll
Marker631689	lmxll	lm	ll	lm	lm	lm	ll	lm	lm	lm	ll	ll	lm	ll	ll	lm	lm	lm	lm	lm	lm	lm	lm	lm	ll	ll	lm	ll	ll	ll	ll	ll	ll	ll	ll	ll	lm	lm	ll	lm	lm	lm	ll	lm	lm	lm	ll	lm	lm
Marker344012	lmxll	lm	ll	lm	lm	lm	ll	lm	lm	lm	ll	ll	lm	ll	ll	lm	lm	lm	lm	lm	lm	lm	lm	lm	ll	ll	lm	ll	ll	ll	ll	ll	ll	ll	ll	ll	lm	lm	ll	lm	lm	lm	ll	lm	lm	lm	ll	lm	lm
Marker12465	lmxll	lm	ll	lm	lm	lm	ll	lm	lm	lm	ll	ll	lm	ll	ll	lm	lm	lm	lm	lm	lm	lm	lm	lm	ll	ll	lm	ll	ll	ll	ll	ll	ll	ll	ll	ll	lm	lm	ll	lm	lm	lm	ll	lm	lm	lm	ll	lm	lm
Marker187112	lmxll	ll	lm	ll	ll	ll	lm	ll	ll	ll	lm	lm	ll	lm	lm	ll	ll	ll	ll	ll	ll	ll	ll	ll	lm	lm	ll	lm	lm	lm	lm	lm	lm	lm	lm	lm	ll	ll	lm	ll	ll	ll	lm	ll	ll	ll	lm	ll	ll
Marker146408	lmxll	lm	ll	lm	lm	lm	ll	lm	lm	lm	ll	ll	lm	ll	ll	lm	lm	lm	lm	lm	lm	lm	lm	lm	ll	ll	lm	ll	ll	ll	ll	ll	ll	ll	ll	ll	lm	lm	ll	lm	lm	lm	ll	lm	lm	lm	ll	lm	lm
Marker472334	lmxll	ll	lm	ll	ll	ll	lm	ll	ll	ll	lm	lm	ll	lm	lm	ll	ll	ll	ll	ll	ll	ll	ll	ll	lm	lm	ll	lm	lm	lm	lm	lm	lm	lm	lm	lm	ll	ll	lm	ll	ll	ll	lm	ll	ll	ll	lm	ll	ll
Marker105091	lmxll	ll	lm	ll	ll	ll	lm	ll	ll	ll	lm	lm	ll	lm	lm	ll	ll	ll	ll	ll	ll	ll	ll	ll	lm	lm	ll	lm	lm	lm	lm	lm	lm	lm	lm	lm	ll	ll	lm	ll	ll	ll	lm	ll	ll	ll	lm	lm	ll
Marker275522	lmxll	ll	lm	ll	ll	ll	lm	ll	ll	ll	lm	lm	ll	lm	lm	ll	ll	ll	ll	ll	ll	ll	ll	ll	lm	lm	ll	lm	lm	lm	lm	lm	lm	lm	lm	lm	ll	ll	lm	ll	ll	ll	lm	ll	ll	ll	lm	lm	ll
Marker336250	lmxll	lm	ll	lm	lm	lm	ll	lm	lm	lm	ll	ll	lm	ll	lm	lm	lm	lm	lm	lm	lm	lm	lm	lm	ll	ll	lm	ll	ll	ll	ll	ll	ll	ll	ll	ll	lm	lm	ll	lm	lm	lm	ll	lm	lm	lm	ll	ll	lm
Marker228047	lmxll	lm	ll	lm	lm	lm	ll	lm	lm	lm	ll	ll	lm	ll	lm	lm	lm	lm	lm	lm	lm	lm	lm	lm	ll	ll	lm	ll	ll	ll	ll	ll	ll	ll	ll	ll	lm	lm	ll	lm	lm	lm	ll	lm	lm	lm	ll	ll	lm
Marker325195	lmxll	lm	ll	lm	lm	lm	ll	lm	lm	lm	ll	ll	lm	ll	lm	lm	lm	lm	lm	lm	lm	lm	lm	lm	ll	ll	lm	ll	ll	ll	ll	ll	ll	ll	ll	ll	lm	lm	ll	lm	lm	lm	ll	lm	lm	lm	ll	ll	lm
Marker397684	nnxnp	nn	np	nn	nn	nn	np	nn	nn	nn	nn	nn	nn	np	nn	nn	np	nn	nn	np	nn	nn	np	nn	np	np	nn	np	np	np	np	np	np	np	np	nn	np	np	nn	nn	nn	nn	nn	nn	np	nn	np	np	nn
Marker303954	nnxnp	np	nn	np	np	np	nn	np	np	np	np	np	np	nn	np	np	nn	np	np	nn	np	np	nn	np	nn	nn	np	nn	nn	nn	nn	nn	nn	nn	nn	np	nn	nn	np	np	np	np	np	np	nn	np	nn	nn	np
Marker462506	lmxll	ll	lm	ll	ll	ll	lm	ll	ll	ll	lm	lm	ll	lm	ll	ll	ll	ll	ll	ll	ll	ll	ll	ll	lm	lm	ll	lm	lm	lm	lm	lm	lm	lm	lm	lm	ll	ll	lm	ll	ll	ll	lm	ll	ll	ll	lm	lm	ll
Marker271149	lmxll	ll	lm	ll	ll	ll	lm	ll	ll	ll	lm	lm	ll	lm	ll	ll	ll	ll	ll	ll	ll	ll	ll	ll	lm	lm	ll	lm	lm	lm	lm	lm	lm	lm	lm	lm	ll	ll	lm	ll	ll	ll	lm	ll	ll	ll	lm	lm	ll
Marker394876	nnxnp	nn	np	nn	nn	nn	np	nn	nn	nn	nn	nn	nn	np	nn	nn	np	nn	nn	np	np	nn	np	nn	np	np	nn	np	np	np	np	np	np	np	np	nn	np	np	np	nn	nn	nn	nn	nn	np	nn	np	np	nn
Marker315388	nnxnp	np	nn	np	np	np	nn	np	np	np	np	np	np	nn	np	np	nn	np	np	nn	nn	np	nn	np	nn	nn	np	nn	nn	nn	nn	nn	nn	nn	nn	np	nn	nn	nn	np	np	np	np	np	nn	np	nn	nn	np
Marker354631	lmxll	ll	lm	ll	ll	ll	lm	ll	ll	ll	lm	ll	ll	lm	ll	ll	ll	ll	ll	ll	ll	ll	ll	ll	lm	ll	ll	lm	lm	lm	lm	lm	lm	lm	lm	lm	ll	ll	lm	ll	ll	ll	lm	ll	ll	ll	ll	lm	lm
Marker334284	lmxll	ll	lm	ll	ll	ll	lm	ll	ll	ll	lm	ll	ll	lm	ll	ll	ll	ll	ll	ll	ll	ll	ll	ll	lm	ll	ll	lm	lm	lm	lm	lm	lm	lm	lm	lm	ll	ll	lm	ll	ll	ll	lm	ll	ll	ll	ll	lm	lm
Marker275075	lmxll	lm	ll	lm	lm	lm	ll	lm	lm	lm	ll	lm	lm	ll	lm	lm	lm	lm	lm	lm	lm	lm	lm	lm	ll	lm	lm	ll	ll	ll	ll	ll	ll	ll	ll	ll	lm	lm	ll	lm	lm	lm	ll	lm	lm	lm	lm	ll	ll
Marker99781	lmxll	ll	lm	ll	ll	ll	lm	ll	ll	ll	lm	ll	ll	lm	ll	ll	ll	ll	ll	ll	ll	ll	ll	ll	lm	ll	ll	lm	lm	lm	lm	lm	lm	lm	lm	lm	ll	ll	lm	ll	ll	ll	lm	ll	ll	ll	ll	lm	lm
Marker176115	lmxll	lm	ll	lm	lm	lm	ll	lm	lm	lm	ll	lm	lm	ll	lm	lm	lm	lm	lm	lm	lm	lm	lm	lm	ll	lm	lm	ll	ll	ll	ll	ll	ll	ll	ll	ll	lm	lm	ll	lm	lm	lm	ll	lm	lm	lm	lm	ll	ll
Marker194120	lmxll	ll	lm	ll	ll	ll	lm	ll	ll	ll	lm	ll	ll	lm	ll	ll	ll	ll	ll	ll	ll	ll	ll	ll	lm	ll	ll	lm	lm	lm	lm	lm	lm	lm	lm	lm	ll	ll	lm	ll	ll	ll	lm	ll	ll	ll	ll	lm	lm
Marker137684	nnxnp	nn	np	nn	nn	nn	np	nn	nn	nn	nn	nn	nn	np	nn	nn	np	nn	nn	np	nn	nn	np	nn	np	np	nn	np	np	np	np	np	np	np	np	nn	np	np	nn	nn	nn	nn	nn	nn	np	nn	np	np	nn
Marker110459	nnxnp	np	nn	np	np	np	nn	np	np	np	np	np	np	nn	np	np	nn	np	np	nn	np	np	nn	np	nn	nn	np	nn	nn	nn	nn	nn	nn	nn	nn	np	nn	nn	np	np	np	np	np	np	nn	np	nn	nn	np
Marker598746	nnxnp	np	nn	np	np	np	nn	np	np	np	np	np	np	nn	np	np	nn	np	np	nn	np	np	nn	np	nn	nn	np	nn	nn	nn	nn	nn	nn	nn	nn	np	nn	nn	np	np	np	np	np	np	nn	np	nn	nn	np
Marker271745	nnxnp	np	nn	np	np	np	nn	np	np	np	np	np	np	nn	np	np	nn	np	np	nn	np	np	nn	np	nn	nn	np	nn	nn	nn	nn	nn	nn	nn	nn	np	nn	nn	np	np	np	np	np	np	nn	np	nn	nn	np
Marker146960	nnxnp	nn	np	nn	nn	nn	np	nn	nn	nn	nn	nn	nn	np	nn	nn	np	nn	nn	np	nn	nn	np	nn	np	np	nn	np	np	np	np	np	np	np	np	nn	np	np	nn	nn	nn	nn	nn	nn	np	nn	np	np	nn
Marker386448	nnxnp	nn	np	nn	nn	nn	np	nn	nn	nn	nn	nn	nn	np	nn	nn	np	nn	nn	np	nn	nn	np	nn	np	np	nn	np	np	np	np	np	np	np	np	nn	np	np	nn	nn	nn	nn	nn	nn	np	nn	np	np	nn
Marker201919	nnxnp	nn	np	nn	nn	nn	np	nn	nn	nn	nn	nn	nn	np	nn	nn	np	nn	nn	np	nn	nn	np	nn	np	np	nn	np	np	np	np	np	np	np	np	nn	np	np	nn	nn	nn	nn	nn	nn	np	nn	np	np	nn
Marker81278	nnxnp	nn	np	nn	nn	nn	np	nn	nn	nn	nn	nn	nn	np	nn	nn	np	nn	nn	np	nn	nn	np	nn	np	np	nn	np	np	np	np	np	np	np	np	nn	np	np	nn	nn	nn	nn	nn	nn	np	nn	np	np	nn
Marker468835	nnxnp	nn	np	nn	nn	nn	np	nn	nn	nn	nn	nn	nn	np	nn	nn	np	nn	nn	np	nn	nn	np	nn	np	np	nn	np	np	np	np	np	np	np	np	nn	np	np	nn	nn	nn	nn	nn	nn	np	nn	np	np	nn
Marker363438	nnxnp	nn	np	nn	nn	nn	np	nn	nn	nn	nn	nn	nn	np	nn	nn	np	nn	nn	np	nn	nn	np	nn	np	np	nn	np	np	np	np	np	np	np	np	nn	np	np	nn	nn	nn	nn	nn	nn	np	nn	np	np	nn
Marker214951	nnxnp	nn	np	nn	nn	nn	np	nn	nn	nn	nn	nn	nn	np	nn	nn	np	nn	nn	np	nn	nn	np	nn	np	np	nn	np	np	np	np	np	np	np	np	nn	np	np	nn	nn	nn	nn	nn	nn	np	nn	np	np	nn
Marker302301	nnxnp	np	nn	np	np	np	nn	np	np	np	np	np	np	nn	np	np	nn	np	np	nn	np	np	nn	np	nn	nn	np	nn	nn	nn	nn	nn	nn	nn	nn	np	nn	nn	np	np	np	np	np	np	nn	np	nn	nn	np
Marker39706	nnxnp	np	nn	np	np	np	nn	np	np	np	np	np	np	nn	np	np	nn	np	np	nn	np	np	nn	np	nn	nn	np	nn	nn	nn	nn	nn	nn	nn	nn	np	nn	nn	np	np	np	np	np	np	nn	np	nn	nn	np
Marker91468	lmxll	lm	ll	lm	lm	lm	ll	lm	lm	lm	ll	lm	lm	ll	lm	lm	lm	lm	lm	lm	ll	lm	lm	lm	ll	lm	lm	ll	ll	ll	ll	ll	ll	ll	ll	ll	lm	lm	lm	lm	lm	lm	ll	lm	lm	lm	lm	ll	ll
Marker601835	lmxll	ll	lm	ll	ll	ll	lm	ll	ll	ll	lm	ll	ll	lm	ll	ll	ll	ll	ll	ll	lm	ll	ll	ll	lm	ll	ll	lm	lm	lm	lm	lm	lm	lm	lm	lm	ll	ll	ll	ll	ll	ll	lm	ll	ll	ll	ll	lm	lm
Marker198808	lmxll	ll	lm	ll	ll	ll	lm	ll	ll	ll	lm	ll	ll	lm	ll	ll	ll	ll	ll	ll	lm	ll	ll	ll	lm	ll	ll	lm	lm	lm	lm	lm	lm	lm	lm	lm	ll	ll	ll	ll	ll	ll	lm	ll	ll	ll	ll	lm	lm
Marker143629	nnxnp	nn	np	nn	nn	nn	np	nn	nn	nn	nn	nn	nn	np	nn	nn	np	nn	nn	np	nn	nn	np	nn	np	np	nn	np	np	np	np	np	np	np	np	nn	np	np	nn	nn	nn	nn	nn	nn	nn	nn	np	np	nn
Marker274646	nnxnp	np	nn	np	np	np	nn	np	np	np	np	np	np	nn	np	np	nn	np	np	nn	np	np	nn	np	nn	nn	np	nn	nn	nn	nn	nn	nn	nn	nn	np	nn	nn	np	np	np	np	np	np	np	np	nn	nn	np
Marker195881	lmxll	lm	ll	lm	lm	lm	ll	lm	lm	lm	ll	lm	lm	ll	lm	lm	lm	lm	lm	lm	ll	lm	lm	lm	ll	lm	lm	ll	ll	ll	ll	ll	ll	ll	ll	lm	lm	lm	lm	lm	lm	lm	ll	lm	lm	lm	lm	ll	ll
Marker119562	lmxll	lm	ll	lm	lm	lm	ll	lm	lm	lm	ll	lm	lm	ll	lm	lm	lm	lm	lm	lm	ll	lm	lm	lm	ll	lm	lm	ll	ll	ll	ll	ll	ll	ll	ll	lm	lm	lm	lm	lm	lm	lm	ll	lm	lm	lm	lm	ll	ll
Marker227139	lmxll	ll	lm	ll	ll	ll	lm	ll	ll	ll	lm	ll	ll	lm	ll	ll	ll	ll	ll	ll	lm	ll	ll	ll	lm	ll	ll	lm	lm	lm	lm	lm	lm	lm	lm	ll	ll	ll	ll	ll	ll	ll	lm	ll	ll	ll	ll	lm	lm
Marker182728	lmxll	lm	ll	lm	lm	lm	ll	lm	lm	lm	ll	lm	lm	ll	lm	lm	lm	lm	lm	lm	ll	lm	lm	lm	ll	lm	lm	ll	ll	ll	ll	ll	ll	ll	ll	lm	lm	lm	lm	lm	lm	lm	ll	lm	lm	lm	lm	ll	ll
Marker342111	lmxll	ll	lm	ll	ll	ll	lm	ll	ll	ll	lm	ll	ll	lm	ll	ll	ll	ll	ll	ll	lm	ll	ll	ll	lm	ll	ll	lm	lm	lm	lm	lm	lm	lm	lm	ll	ll	ll	ll	ll	ll	ll	lm	ll	ll	ll	ll	lm	lm
Marker591050	lmxll	lm	ll	lm	lm	lm	ll	lm	lm	lm	ll	lm	lm	ll	lm	lm	lm	lm	lm	lm	ll	lm	lm	lm	ll	lm	lm	ll	ll	ll	ll	ll	ll	ll	ll	lm	lm	lm	lm	lm	lm	lm	ll	lm	lm	lm	lm	ll	ll
Marker112605	nnxnp	nn	np	nn	nn	nn	np	nn	nn	nn	nn	nn	nn	np	nn	nn	np	nn	nn	np	nn	nn	np	nn	np	nn	nn	np	np	np	np	np	np	np	np	nn	np	np	nn	nn	nn	nn	nn	nn	nn	nn	np	np	nn
Marker136043	nnxnp	nn	np	nn	nn	nn	np	nn	nn	nn	nn	nn	nn	np	nn	nn	np	nn	nn	np	nn	nn	np	nn	np	nn	nn	np	np	np	np	np	np	np	np	nn	np	np	nn	nn	nn	nn	nn	nn	nn	nn	np	np	nn
Marker310225	nnxnp	np	nn	np	np	np	nn	np	np	np	np	np	np	nn	np	np	nn	np	np	nn	np	np	nn	np	nn	np	np	nn	nn	nn	nn	nn	nn	nn	nn	np	nn	nn	np	np	np	np	np	np	np	np	nn	nn	np
Marker353514	nnxnp	np	nn	np	np	np	nn	np	np	np	np	np	np	nn	np	np	nn	np	np	nn	np	np	nn	np	nn	np	np	nn	nn	nn	nn	nn	nn	nn	nn	np	nn	nn	np	np	np	np	np	np	np	np	nn	nn	np
Marker23115	nnxnp	np	nn	np	np	np	nn	np	np	np	np	np	np	nn	np	np	nn	np	np	nn	np	np	nn	np	nn	np	np	nn	nn	nn	nn	nn	nn	nn	nn	np	nn	nn	np	np	np	np	np	np	np	np	nn	nn	np
Marker436653	nnxnp	nn	np	nn	nn	nn	np	nn	nn	nn	nn	nn	nn	np	nn	nn	np	nn	nn	np	nn	nn	np	nn	np	nn	nn	np	np	np	np	np	np	np	np	nn	np	np	nn	nn	nn	nn	nn	nn	nn	nn	np	np	nn
Marker365262	nnxnp	nn	np	nn	nn	nn	np	nn	nn	nn	nn	nn	nn	np	nn	nn	np	nn	nn	np	nn	nn	np	nn	np	nn	nn	np	np	np	np	np	np	np	np	nn	np	np	nn	nn	nn	nn	nn	nn	nn	nn	np	np	nn
Marker109907	lmxll	ll	lm	ll	ll	ll	lm	ll	ll	ll	lm	ll	ll	lm	ll	ll	ll	ll	ll	ll	ll	ll	ll	ll	lm	ll	ll	lm	lm	lm	lm	lm	lm	lm	lm	ll	ll	ll	ll	ll	ll	ll	lm	ll	ll	ll	ll	lm	lm
Marker568658	lmxll	lm	ll	lm	lm	lm	ll	lm	lm	lm	ll	lm	lm	ll	lm	lm	lm	lm	lm	lm	lm	lm	lm	lm	ll	lm	lm	ll	ll	ll	ll	ll	ll	ll	ll	lm	lm	lm	lm	lm	lm	lm	ll	lm	lm	lm	lm	ll	ll
Marker110816	lmxll	ll	lm	ll	ll	ll	lm	ll	ll	ll	lm	ll	ll	lm	ll	ll	ll	ll	ll	ll	ll	ll	ll	ll	lm	ll	ll	lm	lm	lm	lm	lm	lm	lm	lm	ll	ll	ll	ll	ll	ll	ll	lm	ll	ll	ll	ll	lm	lm
Marker162094	lmxll	ll	lm	ll	ll	ll	lm	ll	ll	ll	lm	ll	ll	lm	ll	ll	ll	ll	ll	ll	ll	ll	ll	ll	lm	ll	ll	lm	lm	lm	lm	lm	lm	lm	lm	ll	ll	ll	ll	ll	ll	ll	lm	ll	ll	ll	ll	lm	lm
Marker107096	nnxnp	np	nn	np	np	np	nn	np	np	np	np	np	np	nn	np	np	np	np	np	np	np	np	nn	np	nn	np	np	nn	nn	nn	nn	nn	nn	nn	nn	np	nn	nn	np	np	np	np	np	np	np	np	nn	nn	np
Marker258825	nnxnp	np	nn	np	np	np	nn	np	np	np	np	np	np	nn	np	np	np	np	np	np	np	np	nn	np	nn	np	np	nn	nn	nn	nn	nn	nn	nn	nn	np	nn	nn	np	np	np	np	np	np	np	np	nn	nn	np
Marker261257	nnxnp	nn	np	nn	nn	nn	np	nn	nn	nn	nn	nn	nn	np	nn	nn	nn	nn	nn	nn	nn	nn	np	nn	np	nn	nn	np	np	np	np	np	np	np	np	nn	np	np	nn	nn	nn	nn	nn	nn	nn	nn	np	np	nn
Marker428849	nnxnp	np	nn	np	np	np	np	np	np	np	np	np	np	nn	np	np	np	np	np	np	np	np	nn	np	nn	np	np	nn	nn	nn	nn	nn	nn	nn	nn	np	nn	nn	np	np	np	np	np	np	np	np	nn	nn	np
Marker189133	nnxnp	nn	np	nn	nn	nn	nn	nn	nn	nn	nn	nn	nn	np	nn	nn	nn	nn	nn	nn	nn	nn	np	nn	np	nn	nn	np	np	np	np	np	np	np	np	nn	np	np	nn	nn	nn	nn	nn	nn	nn	nn	np	np	nn
Marker192574	nnxnp	nn	np	nn	nn	nn	nn	nn	nn	nn	nn	nn	nn	np	nn	nn	nn	nn	nn	nn	nn	nn	np	nn	np	nn	nn	np	np	np	np	np	np	np	np	nn	np	np	nn	nn	nn	nn	nn	nn	nn	nn	np	np	nn
Marker353647	nnxnp	np	nn	np	np	np	np	np	np	np	np	np	np	nn	np	np	np	np	np	np	np	np	nn	np	nn	np	np	nn	nn	nn	nn	nn	nn	nn	nn	np	nn	nn	np	np	np	np	np	np	np	np	nn	nn	np
Marker553147	nnxnp	np	nn	np	np	np	np	np	np	np	np	np	np	nn	np	np	np	np	np	np	np	np	nn	np	nn	np	np	nn	nn	nn	nn	nn	nn	nn	nn	np	nn	nn	np	np	np	np	np	np	np	np	nn	nn	np
Marker337349	nnxnp	np	nn	np	np	np	np	np	np	np	np	np	np	nn	np	np	np	np	np	np	np	np	nn	np	nn	np	np	nn	nn	nn	nn	nn	nn	nn	nn	np	nn	nn	np	np	np	np	np	np	np	np	nn	nn	np
Marker326090	nnxnp	np	nn	np	np	np	np	np	np	np	np	np	np	nn	np	np	np	np	np	np	np	np	nn	np	nn	np	np	nn	nn	nn	nn	nn	nn	nn	nn	np	nn	nn	np	np	np	np	np	np	np	np	nn	nn	np
Marker29985	lmxll	lm	ll	lm	lm	lm	lm	lm	lm	lm	ll	lm	lm	ll	lm	lm	ll	lm	lm	lm	ll	lm	lm	lm	ll	lm	lm	ll	ll	ll	ll	ll	ll	ll	ll	lm	lm	lm	lm	lm	ll	lm	ll	lm	lm	lm	lm	ll	ll
Marker387924	lmxll	ll	lm	ll	ll	ll	ll	ll	ll	ll	lm	ll	ll	lm	ll	ll	lm	ll	ll	ll	lm	ll	ll	ll	lm	ll	ll	lm	lm	lm	lm	lm	lm	lm	lm	ll	ll	ll	ll	ll	lm	ll	lm	ll	ll	ll	ll	lm	lm
Marker248084	lmxll	ll	lm	ll	ll	ll	ll	ll	ll	ll	lm	ll	ll	lm	ll	ll	lm	ll	ll	ll	lm	ll	ll	ll	lm	ll	ll	lm	lm	lm	lm	lm	lm	lm	lm	ll	ll	ll	ll	ll	lm	ll	lm	ll	ll	ll	ll	lm	lm
Marker225070	lmxll	lm	ll	lm	lm	lm	lm	lm	lm	lm	ll	lm	lm	ll	lm	lm	ll	lm	lm	lm	ll	lm	lm	lm	ll	lm	lm	ll	ll	ll	ll	ll	ll	ll	ll	lm	lm	lm	lm	lm	ll	lm	lm	lm	lm	lm	lm	ll	ll
Marker172192	lmxll	ll	lm	ll	ll	ll	ll	ll	ll	ll	lm	ll	ll	lm	ll	ll	lm	ll	ll	ll	lm	ll	ll	ll	lm	ll	ll	lm	lm	lm	lm	lm	lm	lm	lm	ll	ll	ll	ll	ll	lm	ll	ll	ll	ll	ll	ll	lm	lm
Marker784185	lmxll	ll	lm	ll	ll	ll	ll	ll	ll	ll	lm	ll	ll	lm	ll	ll	lm	ll	ll	ll	lm	ll	ll	ll	lm	ll	ll	lm	lm	lm	lm	lm	lm	lm	lm	ll	ll	ll	ll	ll	lm	ll	ll	ll	ll	ll	ll	lm	lm
Marker428139	nnxnp	np	nn	np	np	np	np	np	np	np	np	np	np	nn	np	np	np	np	np	np	np	np	nn	np	nn	np	np	nn	nn	nn	nn	nn	nn	nn	nn	np	nn	nn	np	np	np	np	np	np	np	np	nn	np	np
Marker318980	nnxnp	np	nn	np	np	np	np	np	np	np	np	np	np	nn	np	np	np	np	np	np	np	np	nn	np	nn	np	np	nn	nn	nn	nn	nn	nn	nn	nn	np	nn	nn	np	np	np	np	np	np	np	np	nn	np	np
Marker318393	nnxnp	nn	np	nn	nn	nn	nn	nn	nn	nn	nn	nn	nn	np	nn	nn	nn	nn	nn	nn	nn	nn	np	nn	np	nn	nn	np	np	np	np	np	np	np	np	nn	np	np	nn	nn	nn	nn	nn	nn	nn	nn	np	nn	nn
Marker395412	nnxnp	np	nn	np	np	np	np	np	np	np	np	np	np	nn	np	np	np	np	np	np	np	np	nn	np	nn	np	np	nn	nn	nn	nn	nn	nn	nn	nn	np	nn	nn	np	np	np	np	np	np	np	np	nn	np	np
Marker370312	nnxnp	np	nn	np	np	np	np	np	np	np	np	np	np	nn	np	np	np	np	np	np	np	np	nn	np	nn	np	np	nn	nn	nn	nn	nn	nn	nn	nn	np	nn	nn	np	np	np	np	np	np	np	np	nn	np	np
Marker155713	nnxnp	nn	np	nn	nn	nn	nn	nn	nn	nn	nn	nn	nn	np	nn	nn	nn	nn	nn	nn	nn	nn	np	nn	np	nn	nn	np	np	np	np	np	np	np	np	nn	np	np	nn	nn	nn	nn	nn	nn	nn	nn	np	nn	nn
Marker361983	nnxnp	nn	np	nn	nn	nn	nn	nn	nn	nn	nn	nn	nn	np	nn	nn	nn	nn	nn	nn	nn	nn	np	nn	np	nn	nn	np	np	np	np	np	np	np	np	nn	np	np	nn	nn	nn	nn	nn	nn	nn	nn	np	nn	nn
Marker406572	nnxnp	np	nn	np	np	np	np	np	np	np	np	np	np	nn	np	np	np	np	np	np	np	np	nn	np	nn	np	np	nn	nn	nn	nn	nn	nn	nn	nn	np	nn	nn	np	np	np	np	np	np	np	np	nn	np	np
Marker405432	nnxnp	np	nn	np	np	np	np	np	np	np	np	np	np	nn	np	np	np	np	np	np	np	np	nn	np	nn	np	np	nn	nn	nn	nn	nn	nn	nn	nn	np	nn	nn	np	np	np	np	np	np	np	np	nn	np	np
Marker207318	nnxnp	nn	np	nn	nn	nn	nn	nn	nn	nn	nn	nn	nn	np	nn	nn	nn	nn	nn	nn	nn	nn	np	nn	np	nn	nn	np	np	np	np	np	np	np	np	nn	np	np	nn	nn	nn	nn	nn	nn	nn	nn	np	nn	nn
Marker113484	nnxnp	np	nn	np	np	np	np	np	np	np	np	np	np	nn	np	np	np	np	np	np	np	np	nn	np	nn	np	np	nn	nn	nn	nn	nn	nn	nn	nn	np	nn	nn	np	np	np	np	np	np	np	np	nn	np	np
Marker138887	nnxnp	nn	np	nn	nn	nn	nn	nn	nn	nn	nn	nn	nn	np	nn	nn	nn	nn	nn	nn	nn	nn	np	nn	np	nn	nn	np	np	np	np	np	np	np	np	nn	np	np	nn	nn	nn	nn	nn	nn	nn	nn	np	nn	nn
Marker307379	nnxnp	np	nn	np	np	np	np	np	np	np	np	np	np	nn	np	np	np	np	np	np	np	np	nn	np	nn	np	np	nn	nn	nn	nn	nn	nn	nn	nn	np	nn	nn	np	np	np	np	np	np	np	np	nn	np	np
Marker384983	nnxnp	np	nn	np	np	np	np	np	np	np	np	np	np	nn	np	np	np	np	np	np	np	np	nn	np	nn	np	np	nn	nn	nn	nn	nn	nn	nn	nn	np	nn	nn	np	np	np	np	np	np	np	np	nn	np	np
Marker321087	nnxnp	np	nn	np	np	np	np	np	np	np	np	np	np	nn	np	np	np	np	np	np	np	np	nn	np	nn	np	np	nn	nn	nn	nn	nn	nn	nn	nn	np	nn	nn	np	np	np	np	np	np	np	np	nn	np	np
Marker197897	nnxnp	nn	np	nn	nn	nn	nn	nn	nn	nn	nn	nn	nn	np	nn	nn	nn	nn	nn	nn	nn	nn	np	nn	np	nn	nn	np	np	np	np	np	np	np	np	nn	np	np	nn	nn	nn	nn	nn	nn	nn	nn	np	nn	nn
Marker400838	lmxll	ll	lm	ll	ll	ll	ll	ll	ll	ll	lm	ll	ll	lm	ll	ll	lm	ll	ll	ll	lm	ll	ll	ll	lm	ll	ll	lm	lm	lm	lm	lm	lm	lm	lm	ll	ll	ll	ll	ll	lm	ll	lm	ll	ll	ll	ll	lm	lm
Marker92487	lmxll	lm	ll	lm	lm	lm	lm	lm	lm	lm	ll	lm	lm	ll	lm	lm	ll	lm	lm	lm	ll	lm	lm	lm	ll	lm	lm	ll	ll	ll	ll	ll	ll	ll	ll	lm	lm	lm	lm	lm	ll	lm	ll	lm	lm	lm	lm	ll	ll
Marker324572	lmxll	lm	ll	lm	lm	lm	lm	lm	lm	lm	ll	lm	lm	ll	lm	lm	ll	lm	lm	lm	ll	lm	lm	lm	ll	lm	lm	ll	ll	ll	ll	ll	ll	ll	ll	lm	lm	lm	lm	lm	ll	lm	ll	lm	lm	lm	lm	ll	ll
Marker57178	lmxll	lm	ll	lm	lm	lm	lm	lm	lm	lm	ll	lm	lm	ll	lm	lm	ll	lm	lm	lm	ll	lm	lm	lm	ll	lm	lm	ll	ll	ll	ll	ll	ll	ll	ll	lm	lm	lm	lm	lm	ll	lm	ll	lm	lm	lm	lm	ll	ll
Marker454582	lmxll	lm	ll	lm	lm	lm	lm	lm	lm	lm	ll	lm	lm	ll	lm	lm	ll	lm	lm	lm	ll	lm	lm	lm	ll	lm	lm	ll	ll	ll	ll	ll	ll	ll	ll	lm	lm	lm	lm	lm	ll	lm	lm	lm	lm	lm	lm	ll	ll
Marker265880	lmxll	ll	lm	ll	ll	ll	ll	ll	ll	ll	lm	ll	ll	lm	ll	ll	lm	ll	ll	ll	lm	ll	ll	ll	lm	ll	ll	lm	lm	lm	lm	lm	lm	lm	lm	ll	ll	ll	ll	ll	lm	ll	ll	ll	ll	ll	ll	lm	lm
Marker136713	lmxll	ll	lm	ll	ll	ll	ll	ll	ll	ll	lm	ll	ll	lm	ll	ll	lm	ll	ll	ll	lm	ll	ll	ll	lm	ll	ll	lm	lm	lm	lm	lm	lm	lm	lm	ll	ll	ll	ll	ll	lm	ll	ll	ll	ll	ll	ll	lm	lm
Marker74423	nnxnp	nn	np	nn	nn	nn	nn	nn	nn	nn	np	nn	nn	np	nn	nn	nn	nn	nn	nn	nn	nn	np	nn	np	nn	nn	np	np	np	np	np	np	np	np	nn	np	np	nn	nn	nn	nn	nn	nn	nn	nn	np	nn	np
Marker548538	nnxnp	np	nn	np	np	np	np	np	np	np	nn	np	np	nn	np	np	np	np	np	np	np	np	nn	np	nn	np	np	nn	nn	nn	nn	nn	nn	nn	nn	np	nn	nn	np	np	np	np	np	np	np	np	nn	np	nn
Marker410329	nnxnp	nn	np	nn	nn	nn	nn	nn	nn	nn	np	nn	nn	np	nn	nn	nn	nn	nn	nn	nn	nn	np	nn	np	nn	nn	np	np	np	np	np	np	np	np	nn	np	np	nn	nn	nn	nn	nn	nn	nn	nn	np	nn	np
Marker185851	nnxnp	nn	np	nn	nn	nn	nn	nn	nn	nn	np	nn	nn	np	nn	nn	nn	nn	nn	nn	nn	nn	np	nn	np	nn	nn	np	np	np	np	np	np	np	np	nn	np	np	nn	nn	nn	nn	nn	nn	nn	nn	np	nn	np
Marker191868	nnxnp	nn	np	nn	nn	nn	nn	nn	nn	nn	np	nn	nn	np	nn	nn	nn	nn	nn	nn	nn	nn	np	nn	np	nn	nn	np	np	np	np	np	np	np	np	nn	np	np	nn	nn	nn	nn	nn	nn	nn	nn	np	nn	np
Marker285464	nnxnp	nn	np	nn	nn	nn	nn	nn	nn	nn	np	nn	nn	np	nn	nn	nn	nn	nn	nn	nn	nn	np	nn	np	nn	nn	np	np	np	np	np	np	np	np	nn	np	np	nn	nn	nn	nn	nn	nn	nn	nn	np	nn	np
Marker615261	lmxll	lm	ll	lm	lm	lm	lm	lm	lm	lm	ll	lm	lm	ll	lm	lm	ll	lm	lm	lm	ll	lm	lm	lm	ll	lm	lm	ll	ll	ll	ll	ll	ll	ll	ll	lm	lm	lm	lm	lm	ll	lm	lm	lm	lm	lm	lm	lm	ll
Marker309594	lmxll	lm	ll	lm	lm	lm	lm	lm	lm	lm	ll	lm	lm	ll	lm	lm	ll	lm	lm	lm	ll	lm	lm	lm	ll	lm	lm	ll	ll	ll	ll	ll	ll	ll	ll	lm	lm	lm	lm	lm	ll	lm	lm	lm	lm	lm	lm	lm	ll
Marker355769	lmxll	ll	lm	ll	ll	ll	ll	ll	ll	ll	lm	ll	ll	lm	ll	ll	lm	ll	ll	ll	lm	ll	ll	ll	lm	ll	ll	lm	lm	lm	lm	lm	lm	lm	lm	ll	ll	ll	ll	ll	lm	ll	ll	ll	ll	ll	ll	ll	lm
Marker355286	lmxll	ll	lm	ll	ll	ll	ll	ll	ll	ll	lm	ll	ll	lm	ll	ll	lm	ll	ll	ll	lm	ll	ll	ll	lm	ll	ll	lm	lm	lm	lm	lm	lm	lm	lm	ll	ll	ll	ll	ll	lm	ll	ll	ll	ll	ll	ll	ll	lm
Marker69547	lmxll	ll	lm	ll	ll	ll	ll	ll	ll	ll	lm	ll	ll	lm	ll	ll	lm	ll	ll	ll	lm	ll	ll	ll	lm	ll	ll	lm	lm	lm	lm	lm	lm	lm	lm	ll	ll	ll	ll	ll	lm	ll	ll	ll	ll	ll	ll	ll	lm
Marker356023	nnxnp	np	nn	np	np	np	np	np	np	np	np	np	np	nn	np	np	np	np	np	np	np	np	nn	np	nn	np	np	nn	nn	nn	nn	nn	nn	nn	nn	np	nn	nn	np	np	np	np	np	np	np	np	nn	np	np
Marker560977	nnxnp	np	nn	np	np	np	np	np	np	np	np	np	np	nn	np	np	np	np	np	np	np	np	nn	np	nn	np	np	nn	nn	nn	nn	nn	nn	nn	nn	np	nn	nn	np	np	np	np	np	np	np	np	nn	np	np
Marker137536	nnxnp	nn	np	nn	nn	nn	nn	nn	nn	nn	nn	nn	nn	np	nn	nn	nn	nn	nn	nn	nn	nn	np	nn	np	nn	nn	np	np	np	np	np	np	np	np	nn	np	np	nn	nn	nn	nn	nn	nn	nn	nn	np	nn	nn
Marker233035	nnxnp	np	nn	np	np	np	np	np	np	np	np	np	np	nn	np	np	np	np	np	np	np	np	nn	np	nn	np	np	nn	nn	nn	nn	nn	nn	nn	nn	np	nn	nn	np	np	np	np	np	np	np	np	nn	np	np
Marker113962	nnxnp	np	nn	np	np	np	np	np	np	np	nn	np	np	nn	np	np	np	np	np	np	np	np	nn	np	nn	np	np	nn	nn	nn	nn	nn	nn	nn	nn	np	nn	nn	np	np	np	np	np	np	np	np	nn	np	nn
Marker625333	nnxnp	nn	np	nn	nn	nn	nn	nn	nn	nn	np	nn	nn	np	nn	nn	nn	nn	nn	nn	nn	nn	np	nn	np	nn	nn	np	np	np	np	np	np	np	np	nn	np	np	nn	nn	nn	nn	nn	nn	nn	nn	np	nn	np
Marker215243	nnxnp	nn	np	nn	nn	nn	nn	nn	nn	nn	np	nn	nn	np	nn	nn	nn	nn	nn	nn	nn	nn	np	nn	np	nn	nn	np	np	np	np	np	np	np	np	nn	np	np	nn	nn	nn	nn	nn	nn	nn	nn	np	nn	np
Marker261603	nnxnp	nn	np	nn	nn	nn	nn	nn	nn	nn	np	nn	nn	np	nn	nn	nn	nn	nn	nn	nn	nn	np	nn	np	nn	nn	np	np	np	np	np	np	np	np	nn	np	np	nn	nn	nn	nn	nn	nn	nn	nn	np	nn	np
Marker176053	nnxnp	np	nn	np	np	np	np	np	np	np	nn	np	np	nn	np	np	np	np	np	np	np	np	nn	np	nn	np	np	nn	nn	nn	nn	nn	nn	nn	nn	np	nn	nn	np	np	np	np	np	np	np	np	nn	np	nn
Marker374924	nnxnp	nn	np	nn	nn	nn	nn	nn	nn	nn	np	nn	nn	np	nn	nn	nn	nn	nn	nn	nn	nn	np	nn	np	nn	nn	np	np	np	np	np	np	np	np	nn	np	np	nn	nn	nn	nn	nn	nn	nn	nn	np	nn	np
Marker361999	hkxhk	kk	hh	kk	hk	kk	kk	kk	hk	kk	hh	kk	kk	hh	kk	kk	hk	kk	kk	kk	hk	kk	hk	kk	hh	kk	kk	hh	hh	hh	hh	hh	hh	hh	hh	hk	hk	hk	kk	kk	hk	kk	kk	kk	hk	kk	hk	kk	hh
Marker276255	nnxnp	nn	np	nn	nn	nn	nn	nn	nn	nn	np	nn	nn	np	nn	nn	nn	nn	nn	nn	nn	nn	np	nn	np	nn	nn	np	np	np	np	np	np	np	np	nn	np	np	nn	nn	nn	nn	nn	nn	nn	nn	np	nn	np
Marker247790	nnxnp	nn	np	nn	nn	nn	nn	nn	nn	nn	np	nn	nn	np	nn	nn	nn	nn	nn	nn	nn	nn	np	nn	np	nn	nn	np	np	np	np	np	np	np	np	nn	np	np	nn	nn	nn	nn	nn	nn	nn	nn	np	nn	np
Marker381769	nnxnp	np	nn	np	np	np	np	np	np	np	nn	np	np	nn	np	np	np	np	np	np	np	np	nn	np	nn	np	np	nn	nn	nn	nn	nn	nn	nn	nn	np	nn	nn	np	np	np	np	np	np	np	np	nn	np	nn
Marker453419	nnxnp	nn	np	nn	nn	nn	nn	nn	nn	nn	np	nn	nn	np	nn	nn	nn	nn	nn	nn	nn	nn	np	nn	np	nn	nn	np	np	np	np	np	np	np	np	nn	np	np	nn	nn	nn	nn	nn	nn	nn	nn	np	nn	np
Marker439389	nnxnp	nn	np	nn	nn	nn	nn	nn	nn	nn	np	nn	nn	np	nn	nn	nn	nn	nn	nn	nn	nn	np	nn	np	nn	nn	np	np	np	np	np	np	np	np	nn	np	np	nn	nn	nn	nn	nn	nn	nn	nn	np	nn	np
Marker275830	nnxnp	nn	np	nn	np	nn	nn	nn	np	nn	np	nn	nn	np	nn	nn	nn	nn	nn	nn	nn	nn	np	nn	np	nn	nn	np	np	np	np	np	np	np	np	np	np	np	nn	nn	nn	nn	nn	nn	np	nn	np	nn	np
Marker339931	nnxnp	np	nn	nn	nn	np	np	np	nn	np	nn	np	np	nn	np	np	np	np	np	np	np	np	nn	np	nn	np	np	nn	nn	nn	nn	nn	nn	nn	nn	nn	nn	nn	np	np	np	np	np	np	nn	np	nn	np	nn
Marker412555	nnxnp	nn	np	np	np	nn	nn	nn	np	nn	np	nn	nn	np	nn	nn	nn	nn	nn	nn	nn	nn	np	nn	np	nn	nn	np	np	np	np	np	np	np	np	np	np	np	nn	nn	nn	nn	nn	nn	np	nn	np	nn	np
Marker474346	nnxnp	np	nn	nn	nn	np	np	np	nn	np	nn	np	np	nn	np	np	np	np	np	np	np	np	nn	np	nn	np	np	nn	nn	nn	nn	nn	nn	nn	nn	nn	nn	nn	np	np	np	np	np	np	nn	np	nn	np	nn
Marker364618	nnxnp	np	nn	nn	nn	np	np	np	nn	np	nn	np	np	nn	np	np	np	np	np	np	np	np	nn	np	nn	np	np	nn	nn	nn	nn	nn	nn	nn	nn	nn	nn	nn	np	np	np	np	np	np	nn	np	nn	np	nn
Marker150492	nnxnp	nn	np	nn	np	nn	nn	nn	np	nn	np	nn	nn	np	nn	nn	nn	nn	nn	nn	nn	nn	np	nn	np	nn	nn	np	np	np	np	np	np	np	np	np	np	np	nn	nn	nn	nn	nn	nn	np	nn	np	nn	np
Marker432238	nnxnp	np	nn	np	nn	np	np	np	nn	np	nn	np	np	nn	np	np	np	np	np	np	np	np	nn	np	nn	np	np	nn	nn	nn	nn	nn	nn	nn	nn	nn	nn	nn	np	np	np	np	np	np	nn	np	nn	np	nn
Marker94463	nnxnp	nn	np	nn	np	nn	nn	nn	np	nn	np	nn	nn	np	nn	nn	nn	nn	nn	nn	nn	nn	np	nn	np	nn	nn	np	np	np	np	np	np	np	np	np	np	np	nn	nn	nn	nn	nn	nn	np	nn	np	nn	np
Marker436876	nnxnp	nn	np	nn	np	nn	nn	nn	np	nn	np	nn	nn	np	nn	nn	nn	nn	nn	nn	nn	nn	np	nn	np	nn	nn	np	np	np	np	np	np	np	np	np	np	np	nn	nn	nn	nn	nn	nn	np	nn	np	nn	np
Marker60812	lmxll	lm	ll	lm	lm	lm	lm	lm	lm	lm	ll	lm	lm	ll	lm	lm	ll	lm	lm	lm	ll	lm	lm	lm	ll	lm	lm	ll	ll	ll	ll	ll	ll	ll	ll	lm	lm	lm	lm	lm	ll	lm	lm	lm	lm	lm	lm	lm	ll
Marker116045	lmxll	lm	ll	lm	lm	lm	lm	lm	lm	lm	ll	lm	lm	ll	lm	lm	ll	lm	lm	lm	ll	lm	lm	lm	ll	lm	lm	ll	ll	ll	ll	ll	ll	ll	ll	lm	lm	lm	lm	lm	ll	lm	lm	lm	lm	lm	lm	lm	ll
Marker117701	lmxll	ll	lm	ll	ll	ll	ll	ll	ll	ll	lm	ll	ll	lm	ll	ll	lm	ll	ll	ll	lm	ll	ll	ll	lm	ll	ll	lm	lm	lm	lm	lm	lm	lm	lm	ll	ll	ll	ll	ll	lm	ll	ll	ll	ll	ll	ll	ll	lm
Marker464293	lmxll	ll	lm	ll	ll	ll	ll	ll	ll	ll	lm	ll	ll	lm	ll	ll	lm	ll	ll	ll	lm	ll	ll	ll	lm	ll	ll	lm	lm	lm	lm	lm	lm	lm	lm	ll	ll	ll	ll	ll	lm	ll	ll	ll	ll	ll	ll	ll	lm
Marker409906	lmxll	lm	ll	lm	lm	lm	lm	lm	lm	lm	ll	lm	lm	ll	lm	lm	ll	lm	lm	lm	ll	lm	lm	lm	ll	lm	lm	ll	ll	ll	ll	ll	ll	ll	ll	lm	lm	lm	lm	lm	ll	lm	lm	lm	lm	lm	lm	lm	ll
Marker460673	lmxll	lm	ll	lm	lm	lm	lm	lm	lm	lm	ll	lm	lm	ll	lm	lm	ll	lm	lm	lm	ll	lm	lm	lm	ll	lm	lm	ll	ll	ll	ll	ll	ll	ll	ll	lm	lm	lm	lm	lm	ll	lm	lm	lm	lm	lm	lm	lm	ll
Marker279399	lmxll	lm	ll	lm	lm	lm	lm	lm	lm	lm	ll	lm	lm	ll	lm	lm	ll	lm	lm	lm	ll	lm	lm	lm	ll	lm	lm	ll	ll	ll	ll	ll	ll	ll	ll	lm	lm	lm	lm	lm	ll	lm	lm	lm	lm	lm	lm	lm	ll
Marker173852	lmxll	ll	lm	ll	ll	ll	ll	ll	ll	ll	lm	ll	ll	lm	ll	ll	lm	ll	ll	ll	lm	ll	ll	ll	lm	ll	ll	lm	lm	lm	lm	lm	lm	lm	lm	ll	ll	ll	ll	ll	lm	ll	ll	ll	ll	ll	ll	ll	lm
Marker192606	hkxhk	kk	hh	hk	hh	kk	kk	kk	hk	kk	hh	kk	hk	hh	kk	kk	hk	kk	kk	kk	hk	hk	kk	kk	hh	kk	kk	hh	hh	hh	hh	hh	hh	hh	hh	hk	kk	kk	kk	hk	hk	kk	kk	kk	kk	kk	kk	hk	hh
Marker200046	hkxhk	kk	hh	hk	hh	kk	kk	kk	hk	kk	hh	kk	hk	hh	kk	kk	hk	kk	kk	kk	hk	hk	kk	kk	hh	kk	kk	hh	hh	hh	hh	hh	hh	hh	hh	hk	kk	kk	kk	hk	hk	kk	kk	kk	kk	kk	kk	hk	hh
Marker204976	lmxll	ll	lm	ll	lm	ll	ll	ll	ll	ll	lm	ll	ll	lm	ll	ll	lm	ll	ll	ll	lm	ll	ll	ll	lm	ll	ll	lm	lm	lm	lm	lm	lm	lm	lm	ll	ll	ll	ll	ll	lm	ll	ll	ll	ll	ll	ll	ll	lm
Marker240786	nnxnp	np	nn	nn	nn	np	np	np	nn	np	nn	np	nn	nn	np	np	np	np	np	np	np	nn	np	np	nn	np	np	nn	nn	nn	nn	nn	nn	nn	nn	nn	np	np	np	nn	np	np	np	np	np	np	np	nn	nn
Marker138563	nnxnp	np	nn	nn	nn	np	np	np	nn	np	nn	np	nn	nn	np	np	np	np	np	np	np	nn	np	np	nn	np	np	nn	nn	nn	nn	nn	nn	nn	nn	nn	np	np	np	nn	np	np	np	np	np	np	np	nn	nn
Marker67698	nnxnp	np	nn	nn	nn	np	np	np	nn	np	nn	np	nn	nn	np	np	np	np	np	np	np	nn	np	np	nn	np	np	nn	nn	nn	nn	nn	nn	nn	nn	nn	nn	np	np	nn	np	np	np	np	np	np	np	nn	nn
Marker236330	nnxnp	np	nn	nn	nn	np	np	np	nn	np	nn	np	nn	nn	np	np	np	np	np	np	np	nn	np	np	nn	np	np	nn	nn	nn	nn	nn	nn	nn	nn	nn	nn	np	np	nn	np	np	np	np	np	np	np	nn	nn
Marker312829	nnxnp	nn	np	np	np	nn	nn	nn	np	nn	np	nn	np	np	nn	nn	nn	nn	nn	nn	nn	np	nn	nn	np	nn	nn	np	np	np	np	np	np	np	np	np	np	nn	nn	np	nn	nn	nn	nn	nn	nn	nn	np	np
Marker203873	nnxnp	np	nn	nn	nn	np	np	np	nn	np	nn	np	nn	nn	np	np	np	np	np	np	np	nn	np	np	nn	np	np	nn	nn	nn	nn	nn	nn	nn	nn	nn	nn	np	np	nn	np	np	np	np	np	np	np	nn	nn
Marker682277	nnxnp	nn	np	np	np	nn	nn	nn	np	nn	np	nn	np	np	nn	nn	nn	nn	nn	nn	nn	np	nn	nn	np	nn	nn	np	np	np	np	np	np	np	np	np	nn	nn	nn	np	nn	nn	nn	nn	nn	nn	nn	np	np
Marker254862	nnxnp	np	nn	nn	nn	np	np	np	nn	np	nn	np	nn	nn	np	np	np	np	np	np	np	nn	np	np	nn	np	np	nn	nn	nn	nn	nn	nn	nn	nn	nn	np	np	np	nn	np	np	np	np	np	np	np	nn	nn
Marker354528	nnxnp	np	nn	nn	nn	np	np	np	nn	np	nn	np	nn	nn	np	np	np	np	np	np	np	nn	np	np	nn	np	np	nn	nn	nn	nn	nn	nn	nn	nn	nn	np	np	np	nn	np	np	np	np	np	np	np	nn	nn
Marker408076	lmxll	ll	lm	ll	lm	ll	ll	ll	ll	ll	lm	ll	ll	lm	ll	ll	lm	ll	ll	ll	lm	ll	ll	ll	lm	ll	ll	lm	lm	lm	lm	lm	lm	lm	lm	ll	ll	ll	ll	ll	lm	ll	ll	ll	ll	ll	ll	ll	lm
Marker351614	lmxll	lm	ll	lm	ll	lm	lm	lm	lm	lm	ll	lm	lm	ll	lm	lm	ll	lm	lm	lm	ll	lm	lm	lm	ll	lm	lm	ll	ll	ll	ll	ll	ll	ll	ll	lm	lm	lm	lm	lm	ll	lm	lm	lm	lm	lm	lm	lm	ll
Marker306698	lmxll	ll	lm	ll	lm	ll	ll	ll	ll	ll	lm	ll	ll	lm	ll	ll	lm	ll	ll	ll	lm	ll	ll	ll	lm	ll	ll	lm	lm	lm	lm	lm	lm	lm	lm	ll	ll	ll	ll	ll	lm	ll	ll	ll	ll	ll	ll	ll	lm
Marker432838	lmxll	ll	lm	ll	lm	ll	ll	ll	ll	ll	lm	ll	ll	lm	ll	ll	lm	ll	ll	ll	lm	ll	ll	ll	lm	ll	ll	lm	lm	lm	lm	lm	lm	lm	lm	ll	ll	ll	ll	ll	lm	ll	ll	ll	ll	ll	ll	ll	lm
Marker229843	lmxll	lm	ll	lm	ll	lm	lm	lm	lm	lm	ll	lm	lm	ll	lm	lm	ll	lm	lm	lm	ll	lm	lm	lm	ll	lm	lm	ll	ll	ll	ll	ll	ll	ll	ll	lm	lm	lm	lm	lm	ll	lm	lm	lm	lm	lm	lm	lm	ll
Marker271013	lmxll	lm	ll	lm	ll	lm	lm	lm	lm	lm	ll	lm	lm	ll	lm	lm	ll	lm	lm	lm	ll	lm	lm	lm	ll	lm	lm	ll	ll	ll	ll	ll	ll	ll	ll	lm	lm	lm	lm	lm	ll	lm	lm	lm	lm	lm	lm	lm	ll
Marker292806	lmxll	ll	lm	ll	lm	ll	ll	ll	ll	ll	lm	ll	ll	lm	ll	ll	lm	ll	ll	ll	lm	ll	ll	ll	lm	ll	ll	lm	lm	lm	lm	lm	lm	lm	lm	ll	ll	ll	ll	ll	lm	ll	ll	ll	ll	ll	ll	ll	lm
Marker432360	nnxnp	nn	np	np	np	nn	nn	nn	np	nn	np	nn	np	np	nn	nn	nn	nn	nn	nn	nn	np	nn	nn	np	nn	nn	np	np	np	np	np	np	np	np	np	nn	nn	nn	np	nn	nn	nn	nn	nn	nn	nn	np	np
Marker354322	nnxnp	np	nn	nn	nn	np	np	np	nn	np	nn	np	nn	nn	np	np	np	np	np	np	np	nn	np	np	nn	np	np	nn	nn	nn	nn	nn	nn	nn	nn	nn	np	np	np	nn	np	np	np	np	np	np	np	nn	nn
Marker227346	nnxnp	np	nn	nn	nn	np	np	np	nn	np	nn	np	nn	nn	np	np	np	np	np	np	np	nn	np	np	nn	np	np	nn	nn	nn	nn	nn	nn	nn	nn	nn	np	np	np	nn	np	np	np	np	np	np	np	nn	nn
Marker509207	nnxnp	nn	np	np	np	nn	nn	nn	np	nn	np	nn	np	np	nn	nn	nn	nn	nn	nn	nn	np	nn	nn	np	nn	nn	np	np	np	np	np	np	np	np	np	nn	nn	nn	np	nn	nn	nn	nn	nn	nn	nn	np	np
Marker101195	nnxnp	np	nn	nn	nn	np	np	np	nn	np	nn	np	nn	nn	np	np	np	np	np	np	np	nn	np	np	nn	np	np	nn	nn	nn	nn	nn	nn	nn	nn	nn	np	np	np	nn	np	np	np	np	np	np	np	nn	nn
Marker316926	nnxnp	nn	np	np	np	nn	nn	nn	np	nn	np	nn	np	np	nn	nn	nn	nn	nn	nn	nn	np	nn	nn	np	nn	nn	np	np	np	np	np	np	np	np	np	nn	nn	nn	np	nn	nn	nn	nn	nn	nn	nn	np	np
Marker22891	nnxnp	np	nn	nn	nn	np	np	np	nn	np	nn	np	nn	nn	np	np	np	np	np	np	np	nn	np	np	nn	np	np	nn	nn	nn	nn	nn	nn	nn	nn	nn	np	np	np	nn	np	np	np	np	np	np	np	nn	nn
Marker341471	nnxnp	np	nn	nn	nn	np	np	np	nn	np	nn	np	nn	nn	np	np	np	np	np	np	np	nn	np	np	nn	np	np	nn	nn	nn	nn	nn	nn	nn	nn	nn	np	np	np	nn	np	np	np	np	np	np	np	nn	nn
Marker139125	nnxnp	nn	np	np	np	nn	nn	nn	np	nn	np	nn	np	np	nn	nn	nn	nn	nn	nn	nn	np	nn	nn	np	nn	nn	np	np	np	np	np	np	np	np	np	nn	nn	nn	np	nn	nn	nn	nn	nn	nn	nn	np	np
Marker438735	hkxhk	kk	hh	hk	hh	kk	kk	kk	hk	kk	hh	kk	hk	hh	kk	kk	hk	kk	kk	kk	hk	hk	kk	kk	hh	kk	kk	hh	hh	hh	hh	hh	hh	hh	hh	hk	kk	kk	kk	hk	hk	kk	kk	kk	hk	kk	kk	hk	hh
Marker312680	lmxll	lm	ll	lm	ll	lm	lm	lm	lm	lm	ll	lm	lm	ll	lm	lm	ll	lm	lm	lm	ll	lm	lm	lm	ll	lm	lm	ll	ll	ll	ll	ll	ll	ll	ll	lm	lm	lm	lm	lm	ll	lm	lm	lm	ll	lm	lm	lm	ll
Marker456126	lmxll	lm	ll	lm	ll	lm	lm	lm	lm	lm	ll	lm	lm	ll	lm	lm	ll	lm	lm	lm	ll	lm	lm	lm	ll	lm	lm	ll	ll	ll	ll	ll	ll	ll	ll	lm	lm	lm	lm	lm	ll	lm	lm	lm	ll	lm	lm	lm	ll
Marker268716	lmxll	lm	ll	lm	ll	lm	lm	lm	lm	lm	ll	lm	lm	ll	lm	lm	ll	lm	lm	lm	ll	lm	lm	lm	ll	lm	lm	ll	ll	ll	ll	ll	ll	ll	ll	lm	lm	lm	lm	lm	ll	lm	lm	lm	ll	lm	lm	lm	ll
Marker465391	lmxll	ll	lm	ll	lm	ll	ll	ll	ll	ll	lm	ll	ll	lm	ll	ll	lm	ll	ll	ll	lm	ll	ll	ll	lm	ll	ll	lm	lm	lm	lm	lm	lm	lm	lm	ll	ll	ll	ll	ll	lm	ll	ll	ll	lm	ll	ll	ll	lm
Marker23976	nnxnp	nn	np	np	np	nn	nn	nn	np	nn	np	nn	np	np	nn	nn	nn	nn	nn	nn	nn	np	nn	nn	np	nn	nn	np	np	np	np	np	np	np	np	np	nn	nn	nn	np	nn	nn	nn	nn	nn	nn	nn	np	np
Marker206099	nnxnp	np	nn	nn	nn	np	np	np	nn	np	nn	np	nn	nn	np	np	np	np	np	np	np	nn	np	np	nn	np	np	nn	nn	nn	nn	nn	nn	nn	nn	nn	np	np	np	nn	np	np	np	np	np	np	np	nn	nn
Marker392216	nnxnp	nn	np	np	np	nn	nn	nn	np	nn	np	nn	np	np	nn	nn	nn	nn	nn	nn	nn	np	nn	nn	np	nn	nn	np	np	np	np	np	np	np	np	np	nn	nn	nn	np	nn	nn	nn	nn	nn	nn	nn	np	np
Marker535975	nnxnp	np	nn	nn	nn	np	np	np	nn	np	nn	np	nn	nn	np	np	np	np	np	np	np	nn	np	np	nn	np	np	nn	nn	nn	nn	nn	nn	nn	nn	nn	np	np	np	nn	np	np	np	np	np	np	np	nn	nn
Marker134961	nnxnp	nn	np	np	np	nn	nn	nn	np	nn	np	nn	np	np	nn	nn	nn	nn	nn	nn	nn	np	nn	nn	np	nn	nn	np	np	np	np	np	np	np	np	np	nn	nn	nn	np	nn	nn	nn	nn	nn	nn	nn	np	np
Marker544129	nnxnp	np	nn	nn	nn	np	nn	np	np	np	nn	np	nn	nn	np	np	np	np	np	np	np	nn	np	np	nn	np	np	nn	nn	nn	nn	nn	nn	nn	nn	nn	np	np	np	nn	np	np	np	np	np	np	np	nn	nn
Marker115845	nnxnp	nn	np	np	np	nn	np	nn	nn	nn	np	nn	np	np	nn	nn	nn	nn	nn	nn	nn	np	nn	nn	np	nn	nn	np	np	np	np	np	np	np	np	np	nn	nn	nn	np	nn	nn	nn	nn	nn	nn	nn	np	np
Marker588887	nnxnp	np	nn	nn	nn	np	nn	np	np	np	nn	np	nn	nn	np	np	np	np	np	np	np	nn	np	np	nn	np	np	nn	nn	nn	nn	nn	nn	nn	nn	nn	np	np	np	nn	np	np	np	np	np	np	np	nn	nn
Marker298132	lmxll	ll	lm	ll	lm	ll	ll	ll	ll	ll	lm	ll	ll	lm	ll	ll	lm	ll	ll	ll	ll	ll	ll	ll	lm	ll	ll	lm	lm	lm	lm	lm	lm	lm	lm	ll	ll	ll	ll	ll	lm	ll	ll	ll	lm	ll	ll	ll	lm
Marker417267	lmxll	lm	ll	lm	ll	lm	lm	lm	lm	lm	ll	lm	lm	ll	lm	lm	ll	lm	lm	lm	lm	lm	lm	lm	ll	lm	lm	ll	ll	ll	ll	ll	ll	ll	ll	lm	lm	lm	lm	lm	ll	lm	lm	lm	ll	lm	lm	lm	ll
Marker302131	nnxnp	nn	np	np	np	nn	np	nn	nn	np	np	nn	np	np	nn	nn	nn	nn	nn	nn	nn	np	nn	nn	np	nn	nn	np	np	np	np	np	np	np	np	np	nn	nn	nn	np	nn	nn	nn	nn	nn	nn	nn	np	np
Marker293303	efxeg	ef	eg	fg	eg	ef	fg	ef	ef	fg	eg	ef	fg	eg	ef	ef	ee	ef	ef	ef	ef	fg	ef	ef	eg	ef	ef	eg	eg	eg	eg	eg	eg	eg	eg	fg	ef	ef	ef	fg	ee	ef	ef	ef	ee	ef	ef	fg	eg
Marker92564	hkxhk	kk	hh	hk	hh	kk	hk	kk	kk	hk	hh	kk	hk	hh	kk	kk	hk	kk	kk	kk	kk	hk	kk	kk	hh	kk	kk	hh	hh	hh	hh	hh	hh	hh	hh	hk	kk	kk	kk	hk	hk	kk	kk	kk	hk	kk	kk	hk	hh
Marker294705	nnxnp	np	nn	nn	nn	np	nn	np	np	nn	nn	np	nn	nn	np	np	np	np	np	np	np	nn	np	np	nn	np	np	nn	nn	nn	nn	nn	nn	nn	nn	nn	np	np	np	nn	np	np	np	np	np	np	np	nn	nn
Marker145664	nnxnp	np	nn	nn	nn	np	nn	np	np	nn	nn	np	nn	nn	np	np	np	np	np	np	np	nn	np	np	nn	np	np	nn	nn	nn	nn	nn	nn	nn	nn	nn	np	np	np	nn	np	np	np	np	np	np	np	nn	nn
Marker493510	lmxll	lm	ll	lm	ll	lm	lm	lm	lm	lm	ll	lm	lm	ll	lm	lm	ll	lm	lm	lm	lm	lm	lm	lm	ll	lm	lm	ll	ll	ll	ll	ll	ll	ll	ll	lm	lm	lm	lm	lm	ll	lm	lm	lm	ll	lm	lm	lm	ll
Marker597910	nnxnp	nn	np	nn	np	nn	np	nn	nn	np	np	nn	nn	np	nn	nn	nn	nn	nn	nn	nn	np	nn	nn	np	nn	nn	np	np	np	np	np	np	np	np	np	nn	nn	nn	np	nn	nn	nn	nn	nn	nn	nn	np	np
Marker319477	nnxnp	nn	np	nn	np	nn	np	nn	nn	np	np	nn	nn	np	nn	nn	nn	nn	nn	nn	nn	np	nn	nn	np	nn	nn	np	np	np	np	np	np	np	np	np	nn	nn	nn	np	nn	nn	nn	nn	nn	nn	nn	np	np
Marker232651	nnxnp	nn	np	nn	np	nn	np	nn	nn	np	np	nn	nn	np	nn	nn	nn	nn	nn	nn	nn	np	nn	nn	np	nn	nn	np	np	np	np	np	np	np	np	np	nn	nn	nn	np	nn	nn	nn	nn	nn	nn	nn	np	np
Marker247902	nnxnp	np	nn	np	nn	np	nn	np	np	nn	nn	np	np	nn	np	np	np	np	np	np	np	nn	np	np	nn	np	np	nn	nn	nn	nn	nn	nn	nn	nn	nn	np	np	np	nn	np	np	np	np	np	np	np	nn	nn
Marker194828	nnxnp	nn	np	nn	np	nn	np	nn	nn	np	np	nn	nn	np	nn	nn	nn	nn	nn	nn	nn	np	nn	nn	np	nn	nn	np	np	np	np	np	np	np	np	np	nn	nn	nn	np	nn	nn	nn	nn	nn	nn	nn	np	np
Marker57697	nnxnp	nn	np	nn	np	nn	np	nn	nn	np	np	nn	nn	np	nn	nn	nn	nn	nn	nn	nn	np	nn	nn	np	nn	nn	np	np	np	np	np	np	np	np	np	nn	nn	nn	np	nn	nn	nn	nn	nn	nn	nn	np	np
Marker490122	nnxnp	nn	np	nn	np	nn	np	nn	nn	np	np	nn	nn	np	nn	nn	nn	nn	nn	nn	nn	np	nn	nn	np	nn	nn	np	np	np	np	np	np	np	np	np	nn	nn	nn	np	nn	nn	nn	nn	nn	nn	nn	np	np
Marker288288	nnxnp	nn	np	nn	np	nn	np	nn	nn	np	np	nn	nn	np	nn	nn	nn	nn	nn	nn	nn	np	nn	nn	np	nn	nn	np	np	np	np	np	np	np	np	np	nn	nn	nn	np	nn	nn	nn	nn	nn	nn	nn	np	np
Marker225986	hkxhk	hh	kk	hh	kk	hh	hk	hh	hh	hk	kk	hh	hh	kk	hh	hh	hk	hh	hh	hh	hh	hk	hh	hh	kk	hh	hh	kk	kk	kk	kk	kk	kk	kk	kk	hk	hh	hh	hh	hk	hk	hh	hh	hh	hk	hh	hh	hk	hk
Marker220795	nnxnp	np	nn	np	nn	np	nn	np	np	nn	nn	np	np	nn	np	np	np	np	np	np	np	nn	np	np	nn	np	np	nn	nn	nn	nn	nn	nn	nn	nn	nn	np	np	np	nn	np	np	np	np	np	np	np	nn	nn
Marker444002	lmxll	lm	ll	lm	ll	lm	lm	lm	lm	lm	ll	lm	lm	ll	lm	lm	ll	lm	lm	lm	lm	lm	lm	lm	ll	lm	lm	ll	ll	ll	ll	ll	ll	ll	ll	lm	lm	lm	lm	lm	ll	lm	lm	lm	ll	lm	lm	lm	lm
Marker554984	lmxll	lm	ll	lm	ll	lm	lm	lm	lm	lm	ll	lm	lm	ll	lm	lm	ll	lm	lm	lm	lm	lm	lm	lm	ll	lm	lm	ll	ll	ll	ll	ll	ll	ll	ll	lm	lm	lm	lm	lm	ll	lm	lm	lm	ll	lm	lm	lm	lm
Marker197773	lmxll	ll	lm	ll	lm	ll	ll	ll	ll	ll	lm	ll	ll	lm	ll	ll	lm	ll	ll	ll	ll	ll	ll	ll	lm	ll	ll	lm	lm	lm	lm	lm	lm	lm	lm	ll	ll	ll	ll	ll	lm	ll	ll	ll	lm	ll	ll	ll	ll
Marker208179	lmxll	lm	ll	lm	ll	lm	lm	lm	lm	lm	ll	lm	lm	ll	lm	lm	ll	lm	lm	lm	lm	lm	lm	lm	ll	lm	lm	ll	ll	ll	ll	ll	ll	ll	ll	lm	lm	lm	lm	lm	ll	lm	lm	lm	ll	lm	lm	lm	lm
Marker269446	lmxll	ll	lm	ll	lm	ll	ll	ll	ll	ll	lm	ll	ll	lm	ll	ll	lm	ll	ll	ll	ll	ll	ll	ll	lm	ll	ll	lm	lm	lm	lm	lm	lm	lm	lm	ll	ll	ll	ll	ll	lm	ll	ll	ll	lm	ll	ll	ll	ll
Marker521553	lmxll	lm	ll	lm	ll	lm	lm	lm	lm	lm	ll	lm	lm	ll	lm	lm	ll	lm	lm	lm	lm	lm	lm	lm	ll	lm	lm	ll	ll	ll	ll	ll	ll	ll	ll	lm	lm	lm	lm	lm	ll	lm	lm	lm	ll	lm	lm	lm	lm
Marker201389	lmxll	ll	lm	ll	lm	ll	ll	ll	ll	ll	lm	ll	ll	lm	ll	ll	lm	ll	ll	ll	ll	ll	ll	ll	lm	ll	ll	lm	lm	lm	lm	lm	lm	lm	lm	ll	ll	ll	ll	ll	lm	ll	ll	ll	lm	ll	ll	ll	ll
Marker125636	lmxll	lm	ll	lm	ll	lm	lm	lm	lm	lm	ll	lm	lm	ll	lm	lm	ll	lm	lm	lm	lm	lm	lm	lm	ll	lm	lm	ll	ll	ll	ll	ll	ll	ll	ll	lm	lm	lm	lm	lm	ll	lm	lm	lm	ll	lm	lm	lm	lm
Marker771409	lmxll	ll	lm	ll	lm	ll	ll	ll	ll	ll	lm	ll	ll	lm	ll	ll	lm	ll	ll	ll	ll	ll	ll	ll	lm	ll	ll	lm	lm	lm	lm	lm	lm	lm	lm	ll	ll	ll	ll	ll	lm	ll	ll	ll	lm	ll	ll	ll	ll
Marker390816	lmxll	ll	lm	ll	lm	ll	ll	ll	ll	ll	lm	ll	ll	lm	ll	ll	lm	ll	ll	ll	ll	ll	ll	ll	lm	ll	ll	lm	lm	lm	lm	lm	lm	lm	lm	ll	ll	ll	ll	ll	lm	ll	ll	ll	lm	ll	ll	ll	ll
Marker117661	nnxnp	nn	np	np	np	nn	np	nn	nn	np	np	nn	np	np	nn	nn	nn	nn	nn	nn	nn	np	nn	nn	np	nn	nn	np	np	np	np	np	np	np	np	np	nn	nn	nn	np	nn	nn	nn	nn	nn	nn	nn	np	np
Marker85129	nnxnp	nn	np	np	np	nn	np	nn	nn	np	np	nn	np	np	nn	nn	nn	nn	nn	nn	nn	np	nn	nn	np	nn	nn	np	np	np	np	np	np	np	np	np	nn	nn	nn	np	nn	nn	nn	nn	nn	nn	nn	np	np
Marker187140	nnxnp	np	nn	nn	nn	np	nn	np	np	nn	nn	np	nn	nn	np	np	np	np	np	np	np	nn	np	np	nn	np	np	nn	nn	nn	nn	nn	nn	nn	nn	nn	np	np	np	nn	np	np	np	np	np	np	np	nn	nn
Marker267024	nnxnp	nn	np	np	np	nn	np	nn	nn	np	np	nn	np	np	nn	nn	nn	nn	nn	nn	nn	np	nn	nn	np	nn	nn	np	np	np	np	np	np	np	np	np	nn	nn	nn	np	nn	nn	nn	nn	nn	nn	nn	np	np
Marker83180	nnxnp	nn	np	np	np	nn	np	nn	nn	np	np	nn	np	np	nn	nn	nn	nn	nn	nn	nn	np	nn	nn	np	nn	nn	np	np	np	np	np	np	np	np	np	nn	nn	nn	np	nn	nn	nn	nn	nn	nn	nn	np	np
Marker351737	nnxnp	nn	np	np	np	nn	np	nn	nn	np	np	nn	np	np	nn	nn	nn	nn	nn	nn	nn	np	nn	nn	np	nn	nn	np	np	np	np	np	np	np	np	np	nn	nn	nn	np	nn	nn	nn	nn	nn	nn	nn	np	np
Marker449781	nnxnp	nn	np	np	np	nn	np	nn	nn	np	np	nn	np	np	nn	nn	nn	nn	nn	nn	nn	np	nn	nn	np	nn	nn	np	np	np	np	np	np	np	np	np	nn	nn	nn	np	nn	nn	nn	nn	nn	nn	nn	np	np
Marker225453	lmxll	ll	lm	ll	lm	ll	ll	ll	ll	ll	lm	ll	ll	lm	ll	ll	lm	ll	ll	ll	ll	ll	ll	ll	lm	lm	ll	lm	lm	lm	lm	lm	lm	lm	lm	ll	ll	ll	ll	ll	lm	ll	ll	ll	ll	ll	ll	ll	ll
Marker321692	lmxll	lm	ll	lm	ll	lm	lm	lm	lm	lm	ll	lm	lm	ll	lm	lm	ll	lm	lm	lm	lm	lm	lm	lm	ll	ll	lm	ll	ll	ll	ll	ll	ll	ll	ll	lm	lm	lm	lm	lm	ll	lm	lm	lm	lm	lm	lm	lm	lm
Marker355369	lmxll	lm	ll	lm	ll	lm	lm	lm	lm	lm	ll	lm	lm	ll	lm	lm	ll	lm	lm	lm	lm	lm	lm	lm	ll	ll	lm	ll	ll	ll	ll	ll	ll	ll	ll	lm	lm	lm	lm	lm	ll	lm	lm	lm	lm	lm	lm	lm	lm
Marker696965	lmxll	lm	ll	lm	ll	lm	lm	lm	lm	lm	ll	lm	lm	ll	lm	lm	ll	lm	lm	lm	lm	lm	lm	lm	ll	ll	lm	ll	ll	ll	ll	ll	ll	ll	ll	lm	lm	lm	lm	lm	ll	lm	lm	lm	lm	lm	lm	lm	lm
Marker81013	lmxll	ll	lm	ll	lm	ll	ll	ll	ll	ll	lm	ll	ll	lm	ll	ll	lm	ll	ll	ll	ll	ll	ll	ll	lm	lm	ll	lm	lm	lm	lm	lm	lm	lm	lm	ll	ll	ll	ll	ll	lm	ll	ll	ll	ll	ll	ll	ll	ll
Marker323426	lmxll	ll	lm	ll	lm	ll	ll	ll	ll	ll	lm	ll	ll	ll	ll	ll	lm	ll	ll	ll	ll	ll	ll	ll	lm	lm	ll	lm	lm	lm	lm	lm	lm	lm	lm	ll	ll	ll	ll	ll	lm	ll	ll	ll	ll	ll	ll	ll	ll
Marker355117	lmxll	lm	ll	lm	ll	lm	lm	lm	lm	lm	ll	lm	lm	lm	lm	lm	ll	lm	lm	lm	lm	lm	lm	lm	ll	ll	lm	ll	ll	ll	ll	ll	ll	ll	ll	lm	lm	lm	lm	lm	ll	lm	lm	lm	lm	lm	lm	lm	lm
Marker324419	lmxll	ll	lm	ll	lm	ll	ll	ll	ll	ll	lm	ll	ll	ll	ll	ll	lm	ll	ll	ll	ll	ll	ll	ll	lm	lm	ll	lm	lm	lm	lm	lm	lm	lm	lm	ll	ll	ll	ll	ll	lm	ll	ll	ll	ll	ll	ll	ll	ll
Marker416129	lmxll	lm	ll	lm	ll	lm	lm	lm	lm	lm	ll	lm	lm	lm	lm	lm	ll	lm	lm	lm	lm	lm	lm	lm	ll	ll	lm	ll	ll	ll	ll	ll	ll	ll	ll	lm	lm	lm	lm	lm	ll	lm	lm	lm	lm	lm	lm	lm	lm
Marker426081	nnxnp	nn	np	nn	nn	nn	np	nn	nn	np	np	nn	nn	np	nn	nn	nn	nn	nn	nn	nn	nn	nn	nn	np	nn	nn	np	np	np	np	np	np	np	np	np	nn	nn	np	nn	nn	nn	nn	nn	nn	nn	nn	np	np
Marker115045	nnxnp	nn	np	nn	nn	nn	np	nn	nn	np	np	nn	nn	np	nn	nn	nn	nn	nn	nn	nn	nn	nn	nn	np	nn	nn	np	np	np	np	np	np	np	np	np	nn	nn	np	nn	nn	nn	nn	nn	nn	nn	nn	np	np
Marker214747	nnxnp	nn	np	nn	nn	nn	np	nn	nn	np	np	nn	nn	np	nn	nn	nn	nn	nn	nn	nn	nn	nn	nn	np	nn	nn	np	np	np	np	np	np	np	np	np	nn	nn	np	nn	nn	nn	nn	nn	nn	nn	nn	np	np
Marker361701	nnxnp	nn	np	nn	nn	nn	np	nn	nn	np	np	nn	nn	np	nn	nn	nn	nn	nn	nn	nn	nn	nn	nn	np	nn	nn	np	np	np	np	np	np	np	np	np	nn	nn	np	nn	nn	nn	nn	nn	nn	nn	nn	np	np
Marker451077	nnxnp	np	nn	np	np	np	nn	np	np	nn	nn	np	np	nn	np	np	np	np	np	np	np	np	np	np	nn	np	np	nn	nn	nn	nn	nn	nn	nn	nn	nn	np	np	nn	np	np	np	np	np	np	np	np	nn	nn
Marker630508	nnxnp	np	nn	np	np	np	nn	np	np	nn	nn	np	np	nn	np	np	np	np	np	np	np	np	np	np	nn	np	np	nn	nn	nn	nn	nn	nn	nn	nn	nn	np	np	nn	np	np	np	np	np	np	np	np	nn	nn
Marker697895	nnxnp	nn	np	nn	nn	nn	np	nn	nn	np	np	nn	nn	np	nn	nn	nn	nn	nn	nn	nn	nn	nn	nn	np	nn	nn	np	np	np	np	np	np	np	np	np	nn	nn	np	nn	nn	nn	nn	nn	nn	nn	nn	np	np
Marker143471	nnxnp	np	nn	np	np	np	nn	np	np	nn	nn	np	np	nn	np	np	np	np	np	np	np	np	np	np	nn	np	np	nn	nn	nn	nn	nn	nn	nn	nn	nn	np	np	nn	np	np	np	np	np	np	np	np	nn	nn
Marker267918	nnxnp	nn	np	nn	nn	nn	np	nn	nn	np	np	nn	nn	np	nn	nn	nn	nn	nn	nn	nn	nn	nn	nn	np	nn	nn	np	np	np	np	np	np	np	np	np	nn	nn	np	nn	nn	nn	nn	nn	nn	nn	nn	np	np
Marker448390	nnxnp	np	nn	np	np	np	nn	np	np	nn	nn	np	np	nn	np	np	np	np	np	np	np	np	np	np	nn	np	np	nn	nn	nn	nn	nn	nn	nn	nn	nn	np	np	nn	np	np	np	np	np	np	np	np	nn	nn
Marker104361	nnxnp	np	nn	np	np	np	nn	np	np	nn	nn	np	np	nn	np	np	np	np	np	nn	np	np	np	np	nn	np	np	nn	nn	nn	nn	nn	nn	nn	nn	nn	np	np	nn	np	np	np	np	np	np	np	np	nn	nn
Marker652908	nnxnp	np	nn	np	np	np	nn	np	np	nn	nn	np	np	nn	np	np	np	np	np	nn	np	np	np	np	nn	np	np	nn	nn	nn	nn	nn	nn	nn	nn	nn	np	np	nn	np	np	np	np	np	np	np	np	nn	nn
Marker480705	nnxnp	nn	np	nn	nn	nn	np	nn	nn	np	np	nn	nn	np	nn	nn	nn	nn	nn	np	nn	nn	nn	nn	np	nn	nn	np	np	np	np	np	np	np	np	np	nn	nn	np	nn	nn	nn	nn	nn	nn	nn	nn	np	np
Marker142792	nnxnp	np	nn	np	np	np	nn	np	np	nn	nn	np	np	nn	np	np	np	np	np	nn	np	np	np	np	nn	np	np	nn	nn	nn	nn	nn	nn	nn	nn	nn	np	np	nn	np	np	np	np	np	np	np	np	nn	nn
Marker336617	nnxnp	np	nn	np	np	np	nn	np	np	nn	nn	np	np	nn	np	np	np	np	np	nn	np	np	np	np	nn	np	np	nn	nn	nn	nn	nn	nn	nn	nn	nn	np	np	nn	np	np	np	np	np	np	np	np	nn	nn
Marker366435	nnxnp	np	nn	np	np	np	nn	np	np	nn	nn	np	np	nn	np	np	np	np	np	nn	np	np	np	np	nn	np	np	nn	nn	nn	nn	nn	nn	nn	nn	nn	np	np	nn	np	np	np	np	np	np	np	np	nn	nn
Marker207427	nnxnp	np	nn	np	np	np	nn	np	np	nn	nn	np	np	nn	np	np	np	np	np	nn	np	np	np	np	nn	np	np	nn	nn	nn	nn	nn	nn	nn	nn	nn	np	np	nn	np	np	np	np	np	np	np	np	nn	nn
Marker122452	nnxnp	nn	np	nn	nn	nn	np	nn	nn	np	np	nn	nn	np	nn	nn	nn	nn	nn	np	nn	nn	nn	nn	np	nn	nn	np	np	np	np	np	np	np	np	np	nn	nn	np	nn	nn	nn	nn	nn	nn	nn	nn	np	np
Marker388828	nnxnp	nn	np	nn	nn	nn	np	nn	nn	np	np	nn	nn	np	nn	nn	nn	nn	nn	np	nn	nn	nn	nn	np	nn	nn	np	np	np	np	np	np	np	np	np	nn	nn	np	nn	nn	nn	nn	nn	nn	nn	nn	np	np
Marker273591	nnxnp	np	nn	np	np	np	nn	np	np	nn	nn	np	np	nn	np	np	np	np	np	nn	np	np	np	np	nn	np	np	nn	nn	nn	nn	nn	nn	nn	nn	nn	np	np	nn	np	np	np	np	np	np	np	np	nn	nn
Marker232191	nnxnp	np	nn	np	np	np	nn	np	np	nn	nn	np	np	nn	np	np	np	np	np	nn	np	np	np	np	nn	np	np	nn	nn	nn	nn	nn	nn	nn	nn	nn	np	np	nn	np	np	np	np	np	np	np	np	nn	nn
Marker35109	lmxll	lm	ll	lm	lm	ll	lm	lm	lm	lm	ll	lm	lm	lm	lm	lm	lm	lm	lm	lm	lm	ll	lm	ll	ll	ll	lm	ll	ll	ll	ll	ll	ll	ll	ll	lm	lm	lm	lm	lm	ll	lm	lm	lm	lm	lm	lm	lm	lm
Marker275347	lmxll	ll	lm	ll	ll	lm	ll	ll	ll	ll	lm	ll	ll	ll	ll	ll	ll	ll	ll	ll	ll	lm	ll	lm	lm	lm	ll	lm	lm	lm	lm	lm	lm	lm	lm	ll	ll	ll	ll	ll	lm	ll	ll	ll	ll	ll	ll	ll	ll
Marker438722	lmxll	lm	ll	lm	lm	ll	lm	lm	lm	lm	ll	lm	lm	lm	lm	lm	lm	lm	lm	lm	lm	ll	lm	ll	ll	ll	lm	ll	ll	ll	ll	ll	ll	ll	ll	lm	lm	lm	lm	lm	ll	lm	lm	lm	lm	lm	lm	lm	lm
Marker207401	lmxll	lm	ll	lm	lm	ll	lm	lm	lm	lm	ll	lm	lm	lm	lm	lm	lm	lm	lm	lm	lm	ll	lm	ll	ll	ll	lm	ll	ll	ll	ll	ll	ll	ll	ll	lm	lm	lm	lm	lm	ll	lm	lm	lm	lm	lm	lm	lm	lm
Marker277216	lmxll	ll	lm	ll	ll	lm	ll	ll	ll	ll	lm	ll	ll	ll	ll	ll	ll	ll	ll	ll	ll	lm	ll	lm	lm	lm	ll	lm	lm	lm	lm	lm	lm	lm	lm	ll	ll	ll	ll	ll	lm	ll	ll	ll	ll	ll	ll	ll	ll
Marker386271	nnxnp	nn	np	nn	nn	nn	np	nn	nn	np	np	nn	nn	np	nn	nn	nn	nn	nn	np	nn	nn	nn	nn	np	nn	nn	np	np	np	np	np	np	np	np	np	nn	nn	np	nn	nn	nn	np	nn	nn	nn	nn	np	np
Marker500376	nnxnp	np	nn	np	np	np	nn	np	np	nn	nn	np	np	nn	np	np	np	np	np	nn	np	np	np	np	nn	np	np	nn	nn	nn	nn	nn	nn	nn	nn	nn	np	np	nn	np	np	np	nn	np	np	np	np	nn	nn
Marker604878	nnxnp	nn	np	nn	nn	nn	np	nn	nn	np	np	nn	nn	np	nn	nn	nn	nn	nn	np	nn	nn	nn	nn	np	nn	nn	np	np	np	np	np	np	np	np	np	nn	nn	np	nn	nn	nn	np	nn	nn	nn	nn	np	np
Marker336711	nnxnp	np	nn	np	np	np	nn	np	np	nn	nn	np	np	nn	np	np	np	np	np	nn	np	np	np	np	nn	np	np	nn	nn	nn	nn	nn	nn	nn	nn	nn	np	np	nn	np	np	np	nn	np	np	np	np	nn	nn
Marker532623	nnxnp	np	nn	np	np	np	nn	np	np	nn	nn	np	np	nn	np	np	np	np	np	nn	np	np	np	np	nn	np	np	nn	nn	nn	nn	nn	nn	nn	nn	nn	np	np	nn	np	np	np	nn	np	np	np	np	nn	nn
Marker151124	nnxnp	np	nn	np	np	np	nn	np	np	nn	nn	np	np	nn	np	np	np	np	np	nn	np	np	np	np	nn	np	np	nn	nn	nn	nn	nn	nn	nn	nn	nn	np	np	nn	np	np	np	nn	np	np	np	np	nn	nn
Marker239238	lmxll	ll	lm	ll	ll	lm	ll	ll	lm	ll	lm	ll	ll	ll	ll	ll	ll	ll	ll	ll	ll	lm	ll	lm	lm	lm	ll	lm	lm	lm	lm	lm	lm	lm	lm	ll	ll	ll	ll	ll	lm	ll	ll	ll	ll	ll	ll	ll	ll
Marker176793	lmxll	ll	lm	ll	ll	lm	ll	ll	lm	ll	lm	ll	ll	ll	ll	ll	ll	ll	ll	ll	ll	lm	ll	lm	lm	lm	ll	lm	lm	lm	lm	lm	lm	lm	lm	ll	ll	ll	ll	ll	lm	ll	ll	ll	ll	ll	ll	ll	ll
Marker42176	nnxnp	np	nn	np	np	np	nn	np	np	nn	nn	np	np	nn	np	np	np	np	np	nn	np	np	np	np	nn	np	np	nn	nn	nn	nn	nn	nn	nn	nn	nn	np	np	nn	np	np	np	nn	np	np	np	np	nn	nn
Marker197415	nnxnp	np	nn	np	np	np	nn	np	np	nn	nn	np	np	nn	np	np	np	np	np	nn	np	np	np	np	nn	np	np	nn	nn	nn	nn	nn	nn	nn	nn	nn	np	np	nn	np	np	np	nn	np	np	np	np	nn	nn
Marker114949	lmxll	lm	ll	lm	lm	ll	lm	lm	ll	lm	ll	lm	lm	lm	lm	lm	lm	lm	lm	lm	lm	ll	lm	ll	ll	ll	lm	ll	ll	ll	ll	ll	ll	ll	ll	lm	lm	lm	lm	lm	ll	lm	lm	lm	lm	lm	lm	lm	lm
Marker400821	nnxnp	np	nn	np	np	np	nn	np	np	nn	nn	nn	np	nn	np	np	np	np	np	nn	np	np	np	np	nn	nn	np	nn	nn	nn	nn	nn	nn	nn	nn	nn	np	np	nn	np	np	np	nn	nn	np	np	np	nn	nn
Marker460923	nnxnp	np	nn	np	np	np	nn	np	np	nn	nn	nn	np	nn	np	np	np	np	np	nn	np	np	np	np	nn	nn	np	nn	nn	nn	nn	nn	nn	nn	nn	nn	np	np	nn	np	np	np	nn	nn	np	np	np	nn	nn
Marker180835	nnxnp	nn	np	nn	nn	nn	np	nn	nn	np	np	np	nn	np	nn	nn	nn	nn	nn	np	nn	nn	nn	nn	np	np	nn	np	np	np	np	np	np	np	np	np	nn	nn	np	nn	nn	nn	np	np	nn	nn	nn	np	np
Marker163608	nnxnp	np	nn	np	np	np	nn	np	np	nn	nn	nn	np	nn	np	np	np	np	np	nn	np	np	np	np	nn	nn	np	nn	nn	nn	nn	nn	nn	nn	nn	nn	np	np	nn	np	np	np	nn	nn	np	np	np	nn	nn
Marker731946	nnxnp	nn	np	nn	nn	nn	np	nn	nn	np	np	np	nn	np	nn	nn	nn	nn	nn	np	nn	nn	nn	nn	np	np	nn	np	np	np	np	np	np	np	np	np	nn	nn	np	nn	nn	nn	np	np	nn	nn	nn	np	np
Marker165420	nnxnp	nn	np	nn	nn	nn	np	nn	nn	np	np	np	nn	np	nn	nn	nn	nn	nn	np	nn	nn	nn	nn	np	np	nn	np	np	np	np	np	np	np	np	np	nn	nn	np	nn	nn	nn	np	np	nn	nn	nn	np	np
Marker198765	nnxnp	nn	np	nn	nn	nn	np	nn	nn	np	np	np	nn	np	nn	nn	nn	nn	nn	np	nn	nn	nn	nn	np	np	nn	np	np	np	np	np	np	np	np	np	nn	nn	np	nn	nn	nn	np	np	nn	nn	nn	np	np
Marker366251	nnxnp	nn	np	nn	nn	nn	np	nn	nn	np	np	np	nn	np	nn	nn	nn	nn	nn	np	nn	nn	nn	nn	np	np	nn	np	np	np	np	np	np	np	np	np	nn	nn	np	nn	nn	nn	np	np	nn	nn	nn	np	np
Marker234847	nnxnp	np	nn	np	np	np	nn	np	np	nn	nn	nn	np	nn	np	np	np	np	np	nn	np	np	np	np	nn	nn	np	nn	nn	nn	nn	nn	nn	nn	nn	nn	np	np	nn	np	np	np	nn	nn	np	np	np	nn	nn
Marker346344	nnxnp	nn	np	nn	nn	nn	np	nn	nn	np	np	np	nn	np	nn	nn	nn	nn	nn	np	nn	nn	nn	nn	np	np	nn	np	np	np	np	np	np	np	np	np	nn	nn	np	nn	nn	nn	np	np	nn	nn	nn	np	np
Marker321897	lmxll	lm	ll	lm	lm	ll	lm	lm	lm	ll	ll	lm	lm	lm	lm	lm	lm	lm	ll	lm	lm	ll	ll	lm	ll	ll	lm	ll	ll	ll	ll	ll	ll	ll	ll	lm	lm	lm	lm	lm	ll	lm	lm	lm	lm	lm	lm	lm	lm
Marker202475	lmxll	lm	ll	lm	lm	ll	lm	lm	lm	ll	ll	lm	lm	lm	lm	lm	lm	lm	ll	lm	lm	ll	ll	lm	ll	ll	lm	ll	ll	ll	ll	ll	ll	ll	ll	lm	lm	lm	lm	lm	ll	lm	lm	lm	lm	lm	lm	lm	lm
Marker146428	lmxll	lm	ll	lm	lm	ll	lm	lm	lm	ll	ll	lm	lm	lm	lm	lm	lm	lm	ll	lm	lm	ll	ll	lm	ll	ll	lm	ll	ll	ll	ll	ll	ll	ll	ll	lm	lm	lm	lm	lm	ll	lm	lm	lm	lm	lm	lm	lm	lm
Marker66305	lmxll	lm	ll	lm	lm	ll	lm	lm	lm	ll	ll	lm	lm	lm	lm	lm	lm	lm	ll	lm	lm	ll	ll	lm	ll	ll	lm	ll	ll	ll	ll	ll	ll	ll	ll	lm	lm	lm	lm	lm	ll	lm	lm	lm	lm	lm	lm	lm	lm
Marker248463	lmxll	ll	lm	ll	ll	lm	ll	ll	ll	lm	lm	ll	ll	ll	ll	ll	ll	ll	lm	ll	ll	lm	lm	ll	lm	lm	ll	lm	lm	lm	lm	lm	lm	lm	lm	ll	ll	ll	ll	ll	lm	ll	ll	ll	ll	ll	ll	ll	ll
Marker32443	lmxll	ll	lm	ll	ll	lm	ll	ll	ll	lm	lm	ll	ll	ll	ll	ll	ll	ll	lm	ll	ll	lm	lm	ll	lm	lm	ll	lm	lm	lm	lm	lm	lm	lm	lm	ll	ll	ll	ll	ll	lm	ll	ll	ll	ll	ll	ll	ll	ll
Marker321012	lmxll	ll	lm	ll	ll	lm	ll	ll	ll	lm	lm	ll	ll	ll	ll	ll	ll	ll	lm	ll	ll	lm	lm	ll	lm	lm	ll	lm	lm	lm	lm	lm	lm	lm	lm	ll	ll	ll	ll	ll	lm	ll	ll	ll	ll	ll	ll	ll	ll
Marker97761	lmxll	ll	lm	ll	ll	lm	ll	ll	ll	lm	lm	ll	ll	ll	ll	ll	ll	ll	lm	ll	ll	lm	lm	ll	lm	lm	ll	lm	lm	lm	lm	lm	lm	lm	lm	ll	ll	ll	ll	ll	lm	ll	ll	ll	ll	ll	ll	ll	ll
Marker194060	nnxnp	nn	np	nn	nn	nn	np	nn	nn	np	np	np	nn	np	nn	nn	np	nn	nn	np	nn	nn	nn	nn	np	np	nn	np	np	np	np	np	np	np	np	np	nn	nn	np	nn	nn	nn	np	np	nn	nn	nn	np	np
Marker96048	nnxnp	nn	np	nn	nn	nn	np	nn	nn	np	np	np	nn	np	nn	nn	np	nn	nn	np	nn	nn	nn	nn	np	np	nn	np	np	np	np	np	np	np	np	np	nn	nn	np	nn	nn	nn	np	np	nn	nn	nn	np	np
Marker62752	nnxnp	nn	np	nn	nn	nn	np	nn	nn	np	np	np	nn	np	nn	nn	np	nn	nn	np	nn	nn	nn	nn	np	np	nn	np	np	np	np	np	np	np	np	np	nn	nn	np	nn	nn	nn	np	np	nn	nn	nn	np	np
Marker461511	nnxnp	nn	np	nn	nn	nn	np	nn	nn	np	np	np	nn	np	nn	nn	np	nn	nn	np	nn	nn	nn	nn	np	np	nn	np	np	np	np	np	np	np	np	nn	nn	nn	np	nn	nn	nn	np	np	nn	nn	nn	np	np
Marker54210	nnxnp	np	nn	np	np	np	nn	np	np	nn	nn	nn	np	nn	np	np	nn	np	np	nn	np	np	np	np	nn	nn	np	nn	nn	nn	nn	nn	nn	nn	nn	np	np	np	nn	np	np	np	nn	nn	np	np	np	nn	nn
Marker741212	lmxll	ll	lm	ll	ll	lm	ll	ll	ll	lm	lm	ll	ll	ll	ll	lm	ll	ll	lm	ll	ll	lm	lm	ll	lm	lm	ll	lm	lm	lm	lm	lm	lm	lm	lm	ll	ll	ll	ll	ll	lm	ll	ll	ll	ll	ll	ll	ll	ll
Marker299164	lmxll	lm	ll	lm	lm	ll	lm	lm	lm	ll	ll	lm	lm	lm	lm	ll	lm	lm	ll	lm	lm	ll	ll	lm	ll	ll	lm	ll	ll	ll	ll	ll	ll	ll	ll	lm	lm	lm	lm	lm	ll	lm	lm	lm	lm	lm	lm	lm	lm
Marker626929	nnxnp	np	nn	np	np	np	nn	np	np	nn	nn	nn	np	nn	np	np	nn	np	np	nn	np	np	np	np	nn	nn	np	nn	nn	nn	nn	nn	nn	nn	nn	np	np	np	nn	np	np	np	nn	nn	np	np	np	nn	nn
Marker706412	nnxnp	nn	np	nn	nn	nn	np	nn	nn	np	np	np	nn	np	nn	nn	np	nn	nn	np	nn	nn	nn	nn	np	np	nn	np	np	np	np	np	np	np	np	nn	nn	nn	np	nn	nn	nn	np	np	nn	nn	nn	np	np
Marker245894	efxeg	eg	ef	eg	eg	fg	ee	eg	eg	ef	ef	ee	eg	ee	eg	fg	ee	eg	fg	ee	eg	fg	fg	eg	ef	ef	eg	ef	ef	ef	ef	ef	ef	ef	ef	eg	eg	eg	ee	eg	fg	eg	ee	ee	eg	eg	eg	ee	ee
Marker365453	lmxll	ll	lm	ll	ll	lm	ll	ll	ll	lm	lm	ll	ll	ll	ll	lm	ll	ll	lm	ll	ll	lm	lm	ll	lm	lm	ll	lm	lm	lm	lm	lm	lm	lm	lm	ll	ll	ll	ll	ll	lm	ll	ll	ll	ll	ll	ll	ll	ll
Marker325629	lmxll	ll	lm	ll	ll	lm	ll	ll	ll	lm	lm	ll	ll	ll	ll	lm	ll	ll	lm	ll	ll	lm	lm	ll	lm	lm	ll	lm	lm	lm	lm	lm	lm	lm	lm	ll	ll	ll	ll	ll	lm	ll	ll	ll	ll	ll	ll	ll	ll
Marker333647	lmxll	lm	ll	lm	lm	ll	lm	lm	lm	ll	ll	lm	lm	lm	lm	ll	lm	lm	ll	lm	lm	ll	ll	lm	ll	ll	ll	ll	ll	ll	ll	ll	ll	ll	ll	lm	lm	lm	lm	lm	ll	lm	lm	lm	lm	lm	ll	lm	lm
Marker196729	nnxnp	np	nn	np	np	np	nn	np	np	nn	nn	nn	np	nn	np	np	nn	np	np	nn	np	np	np	np	nn	nn	np	nn	nn	nn	nn	nn	nn	nn	nn	np	np	np	nn	np	np	np	nn	nn	np	np	np	nn	nn
Marker571989	nnxnp	np	nn	np	np	np	nn	np	np	nn	nn	nn	np	nn	np	np	nn	np	np	nn	np	np	np	np	nn	nn	np	nn	nn	nn	nn	nn	nn	nn	nn	np	np	np	nn	np	np	np	nn	nn	np	np	np	nn	nn
Marker193061	lmxll	ll	lm	ll	ll	lm	ll	ll	ll	lm	lm	ll	ll	ll	ll	lm	ll	ll	lm	ll	ll	lm	lm	ll	lm	lm	lm	lm	lm	lm	lm	lm	lm	lm	lm	ll	ll	ll	ll	ll	lm	ll	ll	ll	ll	ll	lm	ll	ll
Marker189576	lmxll	ll	lm	ll	ll	lm	ll	ll	ll	lm	lm	ll	ll	ll	ll	lm	ll	ll	lm	ll	ll	lm	lm	ll	lm	lm	lm	lm	lm	lm	lm	lm	lm	lm	lm	ll	ll	ll	ll	ll	lm	ll	ll	ll	ll	ll	lm	ll	ll
Marker63936	lmxll	ll	lm	ll	ll	lm	ll	ll	ll	lm	lm	ll	ll	ll	ll	lm	ll	ll	lm	ll	ll	lm	lm	ll	lm	lm	lm	lm	lm	lm	lm	lm	lm	lm	lm	ll	ll	ll	ll	ll	lm	ll	ll	ll	ll	ll	lm	ll	ll
Marker67548	nnxnp	np	nn	np	np	np	nn	np	np	nn	nn	nn	np	nn	np	np	nn	np	np	nn	np	np	np	np	nn	nn	np	nn	nn	nn	nn	nn	nn	nn	nn	np	np	nn	nn	np	np	np	nn	nn	np	np	np	nn	nn
Marker259617	nnxnp	nn	np	nn	nn	nn	np	nn	nn	np	np	np	nn	np	nn	nn	np	nn	nn	np	nn	nn	nn	nn	np	np	nn	np	np	np	np	np	np	np	np	nn	nn	np	np	nn	nn	nn	np	np	nn	nn	nn	np	np
Marker139097	efxeg	ee	fg	ee	ee	ef	eg	ee	ee	eg	fg	eg	ee	eg	ee	ef	eg	ee	ef	eg	ee	ef	ef	ee	fg	fg	ef	fg	fg	fg	fg	fg	fg	fg	fg	ee	ee	eg	eg	ee	ef	ee	eg	eg	ee	ee	ef	eg	eg
Marker177358	lmxll	lm	ll	lm	lm	ll	lm	lm	lm	lm	ll	lm	lm	lm	lm	ll	lm	lm	ll	lm	lm	ll	ll	lm	ll	ll	ll	ll	ll	ll	ll	ll	ll	ll	ll	lm	lm	lm	lm	lm	ll	lm	lm	lm	lm	lm	ll	lm	lm
Marker193210	lmxll	ll	lm	ll	ll	lm	ll	ll	ll	ll	lm	ll	ll	ll	ll	lm	ll	ll	lm	ll	ll	lm	lm	ll	lm	lm	lm	lm	lm	lm	lm	lm	lm	lm	lm	ll	ll	ll	ll	ll	lm	ll	ll	ll	ll	lm	lm	ll	ll
Marker261181	nnxnp	nn	np	nn	nn	nn	np	nn	nn	np	np	np	nn	np	nn	nn	np	nn	nn	np	nn	nn	nn	nn	np	np	nn	np	np	np	np	np	np	np	np	nn	nn	np	np	nn	nn	nn	np	np	nn	np	np	np	np
Marker197168	nnxnp	nn	np	nn	nn	nn	np	nn	nn	np	np	np	nn	np	nn	nn	np	nn	nn	np	nn	nn	nn	nn	np	np	nn	np	np	np	np	np	np	np	np	nn	nn	np	np	nn	nn	nn	np	np	nn	np	np	np	np
Marker211391	lmxll	ll	lm	ll	ll	lm	ll	ll	ll	ll	lm	ll	ll	ll	ll	lm	ll	ll	lm	ll	ll	lm	lm	ll	lm	lm	lm	lm	lm	lm	lm	lm	lm	lm	lm	ll	ll	ll	ll	ll	lm	ll	ll	ll	ll	lm	lm	ll	ll
Marker360041	nnxnp	nn	np	nn	nn	nn	np	nn	nn	np	np	np	nn	np	nn	nn	np	nn	nn	np	nn	nn	nn	nn	np	np	nn	np	np	np	np	np	np	np	np	nn	nn	np	np	nn	nn	nn	np	np	nn	np	np	np	np
Marker703216	nnxnp	nn	np	nn	nn	nn	np	nn	nn	np	np	np	nn	np	nn	nn	np	nn	nn	np	nn	nn	nn	nn	np	np	nn	np	np	np	np	np	np	np	np	nn	nn	np	np	nn	nn	nn	np	np	nn	np	np	np	np
Marker351864	nnxnp	nn	np	nn	np	nn	np	nn	nn	np	np	np	nn	np	nn	nn	np	nn	nn	np	nn	nn	nn	nn	np	np	nn	np	np	np	np	np	np	np	np	nn	nn	np	np	nn	nn	nn	np	np	nn	np	np	np	np
Marker125564	nnxnp	nn	np	nn	np	nn	np	nn	nn	np	np	np	nn	np	nn	nn	np	nn	nn	np	nn	nn	nn	nn	np	np	nn	np	np	np	np	np	np	np	np	nn	nn	np	np	nn	nn	nn	np	np	nn	np	np	np	np
Marker417591	nnxnp	nn	nn	nn	np	nn	np	nn	nn	np	np	np	nn	np	nn	nn	np	nn	nn	np	nn	nn	nn	nn	np	np	nn	np	np	np	np	np	np	np	np	nn	nn	np	np	nn	nn	nn	np	np	nn	np	np	np	np
Marker138315	nnxnp	nn	nn	nn	np	nn	np	nn	nn	np	np	np	nn	np	nn	nn	np	nn	nn	np	nn	nn	nn	nn	np	np	nn	np	np	np	np	np	np	np	np	np	nn	np	np	nn	nn	nn	np	np	nn	np	np	np	np
Marker136738	nnxnp	np	np	np	nn	np	nn	np	np	nn	nn	nn	np	nn	np	np	nn	np	np	nn	np	np	nn	np	nn	nn	np	nn	nn	nn	nn	nn	nn	nn	nn	nn	np	nn	nn	np	np	np	nn	nn	np	nn	nn	nn	nn
Marker357225	nnxnp	np	np	np	nn	np	nn	np	np	nn	nn	nn	np	nn	np	np	nn	np	np	nn	np	np	nn	np	nn	nn	np	nn	nn	nn	nn	nn	nn	nn	nn	nn	np	nn	nn	np	np	np	nn	nn	np	nn	nn	nn	nn
Marker311954	nnxnp	np	np	np	nn	np	nn	np	np	nn	nn	nn	np	nn	np	np	nn	np	np	nn	np	np	nn	np	nn	nn	np	nn	nn	nn	nn	nn	nn	nn	nn	nn	np	nn	nn	np	np	np	nn	nn	np	nn	nn	nn	nn
Marker502235	nnxnp	np	np	np	nn	np	nn	np	np	nn	nn	nn	np	nn	np	np	nn	np	np	nn	np	np	nn	np	nn	nn	np	nn	nn	nn	nn	nn	nn	nn	nn	nn	np	nn	nn	np	np	np	nn	nn	np	nn	nn	nn	nn
Marker622304	nnxnp	np	np	np	nn	np	nn	np	np	nn	nn	nn	np	nn	np	np	nn	np	np	nn	np	np	nn	np	nn	nn	np	nn	nn	nn	nn	nn	nn	nn	nn	nn	np	nn	nn	np	np	np	nn	nn	np	nn	nn	nn	nn
Marker680769	nnxnp	np	np	np	nn	np	nn	np	np	nn	nn	nn	np	nn	np	np	nn	np	np	nn	np	np	nn	np	nn	nn	np	nn	nn	nn	nn	nn	nn	nn	nn	nn	np	nn	nn	np	np	np	nn	nn	np	nn	nn	nn	nn
Marker585206	nnxnp	np	np	np	nn	np	nn	np	np	nn	nn	nn	np	nn	np	np	nn	np	np	nn	np	np	nn	np	nn	nn	np	nn	nn	nn	nn	nn	nn	nn	nn	nn	np	nn	nn	np	np	np	nn	nn	np	nn	nn	nn	nn
Marker183830	nnxnp	np	np	np	nn	np	nn	np	np	nn	nn	nn	np	nn	np	np	nn	np	np	nn	np	np	nn	np	nn	nn	np	nn	nn	nn	nn	nn	nn	nn	nn	nn	np	nn	nn	np	np	np	nn	nn	np	nn	nn	nn	nn
Marker727714	nnxnp	nn	nn	nn	np	nn	np	nn	nn	np	np	np	nn	np	nn	nn	np	nn	nn	np	nn	nn	np	nn	np	np	nn	np	np	np	np	np	np	np	np	np	nn	np	np	nn	nn	nn	np	np	nn	np	np	np	np
Marker8575	nnxnp	nn	nn	nn	np	nn	np	nn	nn	np	np	np	nn	np	nn	nn	np	nn	nn	np	nn	nn	np	nn	np	np	nn	np	np	np	np	np	np	np	np	np	nn	np	np	nn	nn	nn	np	np	nn	np	np	np	np
Marker452097	lmxll	ll	ll	ll	ll	lm	ll	ll	lm	lm	ll	ll	ll	ll	ll	ll	ll	ll	ll	ll	ll	ll	lm	lm	ll	ll	ll	lm	ll	lm	lm	lm	lm	lm	lm	ll	lm	ll	ll	ll	ll	ll	ll	ll	ll	ll	lm	ll	ll
Marker520143	lmxll	ll	ll	ll	ll	lm	ll	ll	lm	lm	ll	ll	ll	ll	ll	ll	ll	ll	ll	ll	ll	ll	lm	lm	ll	ll	ll	lm	ll	lm	lm	lm	lm	lm	lm	ll	lm	ll	ll	ll	ll	ll	ll	ll	ll	ll	lm	ll	ll
Marker390190	lmxll	lm	lm	lm	lm	ll	lm	lm	ll	lm	lm	lm	lm	lm	lm	lm	lm	lm	lm	lm	lm	lm	ll	ll	lm	lm	lm	ll	ll	ll	lm	ll	ll	ll	ll	lm	ll	lm	lm	lm	lm	lm	lm	lm	lm	lm	ll	lm	lm
Marker230754	lmxll	ll	ll	ll	ll	lm	ll	ll	lm	ll	ll	ll	ll	ll	ll	ll	ll	ll	ll	ll	ll	ll	lm	lm	ll	ll	ll	lm	lm	lm	ll	lm	lm	lm	lm	ll	lm	ll	ll	ll	ll	ll	ll	ll	ll	ll	lm	ll	ll
Marker106011	lmxll	ll	ll	ll	ll	lm	ll	ll	lm	ll	ll	ll	ll	ll	ll	ll	ll	ll	ll	ll	ll	ll	lm	lm	ll	ll	ll	lm	lm	lm	ll	lm	lm	lm	lm	ll	lm	ll	ll	ll	ll	ll	ll	ll	ll	ll	lm	ll	ll
Marker98685	lmxll	ll	ll	ll	ll	lm	ll	ll	lm	ll	ll	ll	ll	ll	ll	ll	ll	ll	ll	ll	ll	ll	lm	lm	ll	ll	ll	lm	lm	lm	ll	lm	lm	lm	lm	ll	lm	ll	ll	ll	ll	ll	ll	ll	ll	ll	lm	ll	ll
Marker202873	nnxnp	np	nn	nn	np	np	nn	np	nn	np	nn	nn	np	np	nn	np	nn	np	nn	np	nn	np	nn	nn	nn	np	np	nn	nn	nn	nn	nn	nn	nn	nn	np	nn	np	np	nn	nn	np	np	np	np	np	np	np	np
Marker338678	nnxnp	np	nn	nn	np	np	nn	np	nn	np	nn	nn	np	np	nn	np	nn	np	nn	np	nn	np	nn	nn	nn	np	np	nn	nn	nn	nn	nn	nn	nn	nn	np	nn	np	np	nn	nn	np	np	np	np	np	np	np	np
Marker236774	nnxnp	nn	np	np	nn	nn	np	nn	np	nn	np	np	nn	nn	np	nn	np	nn	np	nn	np	nn	np	np	np	nn	nn	np	np	np	np	np	np	np	np	nn	np	nn	nn	np	np	nn	nn	nn	nn	nn	nn	nn	nn
Marker526817	nnxnp	np	nn	nn	np	np	nn	np	nn	np	nn	nn	np	np	nn	np	nn	np	np	np	nn	np	nn	nn	nn	np	np	nn	nn	nn	nn	nn	nn	nn	nn	np	nn	np	np	nn	nn	np	np	np	np	np	np	np	np
Marker191354	hkxhk	kk	hk	hk	kk	hk	hk	kk	hh	kk	hk	hk	kk	kk	hk	kk	hk	kk	kk	kk	hk	kk	hh	hh	hk	kk	kk	hh	hh	hh	hk	hh	hh	hh	hh	kk	hh	kk	kk	hk	hh	kk	kk	kk	kk	kk	hk	kk	kk
Marker307870	lmxll	ll	ll	ll	ll	lm	ll	ll	lm	ll	ll	ll	ll	ll	ll	ll	ll	ll	ll	ll	ll	ll	lm	lm	ll	ll	ll	lm	lm	lm	ll	lm	lm	lm	lm	ll	lm	ll	ll	ll	lm	ll	ll	ll	ll	ll	lm	ll	ll
Marker114211	nnxnp	nn	np	nn	nn	nn	np	nn	np	nn	np	np	nn	nn	np	nn	np	nn	nn	nn	np	nn	np	np	np	nn	nn	np	np	np	np	np	np	np	np	nn	np	nn	nn	np	np	nn	nn	nn	nn	nn	nn	nn	nn
Marker335689	nnxnp	nn	np	nn	nn	nn	np	nn	np	nn	np	np	nn	nn	nn	nn	np	nn	nn	nn	np	nn	np	np	np	nn	nn	np	np	np	np	np	np	np	np	nn	np	nn	nn	np	np	nn	nn	nn	nn	nn	nn	nn	nn
Marker160167	nnxnp	nn	np	nn	nn	nn	np	nn	np	nn	np	np	nn	np	nn	nn	np	nn	nn	nn	np	nn	np	np	np	nn	nn	np	np	np	np	np	np	np	np	nn	np	nn	nn	np	np	nn	nn	nn	nn	nn	nn	nn	nn
Marker196259	nnxnp	nn	np	nn	nn	nn	np	nn	np	nn	np	np	nn	np	nn	nn	np	nn	nn	nn	np	nn	np	np	np	nn	nn	np	np	np	np	np	np	np	np	nn	np	nn	nn	np	np	nn	nn	nn	nn	nn	nn	nn	nn
Marker353138	nnxnp	nn	np	nn	nn	nn	np	nn	np	nn	np	np	nn	np	nn	nn	np	nn	nn	nn	np	nn	np	np	np	nn	nn	np	np	np	np	np	np	np	np	nn	np	nn	nn	np	np	nn	nn	nn	nn	nn	nn	nn	nn
Marker259557	nnxnp	nn	np	nn	nn	nn	np	nn	np	nn	np	np	nn	np	nn	nn	np	nn	nn	nn	np	nn	np	np	np	nn	nn	np	np	np	np	np	np	np	np	nn	np	nn	nn	np	np	nn	nn	nn	nn	nn	nn	nn	nn
Marker137551	lmxll	ll	lm	ll	ll	ll	ll	ll	ll	ll	lm	ll	ll	lm	ll	ll	ll	ll	ll	ll	ll	ll	ll	ll	lm	ll	ll	lm	lm	lm	lm	lm	lm	lm	lm	ll	ll	ll	ll	ll	lm	ll	ll	ll	ll	ll	ll	lm	ll
Marker175947	lmxll	ll	lm	ll	ll	ll	ll	ll	ll	ll	lm	ll	ll	lm	ll	ll	ll	ll	ll	ll	ll	ll	ll	ll	lm	ll	ll	lm	lm	lm	lm	lm	lm	lm	lm	ll	ll	ll	ll	ll	lm	ll	ll	ll	ll	ll	ll	lm	ll
Marker207857	lmxll	lm	ll	lm	lm	lm	lm	lm	lm	lm	ll	lm	lm	ll	lm	lm	lm	lm	lm	lm	lm	lm	lm	lm	ll	lm	lm	ll	ll	ll	ll	ll	ll	ll	ll	lm	lm	lm	lm	lm	lm	lm	lm	lm	lm	lm	lm	ll	lm
Marker361128	lmxll	ll	lm	ll	ll	ll	ll	ll	ll	ll	lm	ll	ll	lm	ll	ll	ll	ll	ll	ll	ll	ll	ll	ll	lm	ll	ll	lm	lm	lm	lm	lm	lm	lm	lm	ll	ll	ll	ll	ll	ll	ll	ll	ll	ll	ll	ll	lm	ll
Marker146179	lmxll	ll	lm	ll	ll	ll	ll	ll	ll	ll	lm	ll	ll	lm	ll	ll	ll	ll	ll	ll	ll	ll	ll	ll	lm	ll	ll	lm	lm	lm	lm	lm	lm	lm	lm	ll	ll	ll	ll	ll	ll	ll	ll	ll	ll	ll	ll	lm	ll
Marker70740	lmxll	ll	lm	ll	ll	ll	ll	ll	ll	ll	lm	ll	ll	lm	ll	ll	ll	ll	ll	ll	ll	ll	ll	ll	lm	ll	ll	lm	lm	lm	lm	lm	lm	lm	lm	ll	ll	ll	ll	ll	ll	ll	ll	ll	ll	ll	ll	lm	ll
Marker349252	lmxll	ll	lm	ll	ll	ll	ll	ll	ll	ll	lm	ll	ll	lm	ll	ll	ll	ll	ll	ll	ll	ll	ll	ll	lm	ll	ll	lm	lm	lm	lm	lm	lm	lm	lm	ll	ll	ll	ll	ll	ll	ll	ll	ll	ll	ll	ll	lm	ll
Marker273732	lmxll	ll	lm	ll	ll	ll	ll	ll	ll	ll	lm	ll	ll	lm	ll	ll	ll	ll	ll	ll	ll	ll	ll	ll	lm	ll	ll	lm	lm	lm	lm	lm	lm	lm	lm	ll	ll	ll	ll	ll	ll	ll	ll	ll	ll	ll	ll	lm	ll
Marker430465	lmxll	ll	lm	ll	ll	ll	ll	ll	ll	ll	lm	ll	ll	lm	ll	ll	ll	ll	ll	ll	ll	ll	ll	ll	lm	ll	ll	lm	lm	lm	lm	lm	lm	lm	lm	ll	ll	ll	ll	ll	ll	ll	ll	ll	ll	ll	ll	lm	ll
Marker579651	lmxll	ll	lm	ll	ll	ll	ll	ll	ll	ll	lm	ll	ll	lm	ll	ll	ll	ll	ll	ll	ll	ll	ll	ll	lm	ll	ll	lm	lm	lm	lm	lm	lm	lm	lm	ll	ll	ll	ll	ll	ll	ll	ll	ll	ll	ll	ll	lm	ll
Marker395031	lmxll	ll	lm	ll	ll	ll	ll	ll	ll	ll	lm	ll	ll	lm	ll	ll	ll	ll	ll	ll	ll	ll	ll	ll	lm	ll	ll	lm	lm	lm	lm	lm	lm	lm	lm	ll	ll	ll	ll	ll	ll	ll	ll	ll	ll	ll	ll	lm	ll
Marker242971	lmxll	lm	ll	lm	lm	lm	lm	lm	lm	lm	ll	lm	lm	ll	lm	lm	lm	lm	lm	lm	lm	lm	lm	lm	ll	lm	lm	ll	ll	ll	ll	ll	ll	ll	ll	lm	lm	lm	lm	lm	lm	lm	lm	lm	lm	lm	lm	ll	lm
Marker265934	lmxll	ll	lm	ll	ll	ll	ll	ll	ll	ll	lm	ll	ll	lm	ll	ll	ll	ll	ll	ll	ll	ll	ll	ll	lm	ll	ll	lm	lm	lm	lm	lm	lm	lm	lm	ll	ll	ll	ll	ll	ll	ll	ll	ll	ll	ll	ll	lm	ll
Marker170424	lmxll	ll	lm	ll	ll	ll	ll	ll	ll	ll	lm	ll	ll	lm	ll	ll	ll	ll	ll	ll	ll	ll	ll	ll	lm	ll	ll	lm	lm	lm	lm	lm	lm	lm	lm	ll	ll	ll	ll	ll	ll	ll	ll	ll	ll	ll	ll	lm	ll
Marker44852	lmxll	ll	lm	ll	ll	ll	ll	ll	ll	ll	lm	ll	ll	lm	ll	ll	ll	ll	ll	ll	ll	ll	ll	ll	lm	ll	ll	lm	lm	lm	lm	lm	lm	lm	lm	ll	ll	ll	ll	ll	ll	ll	ll	ll	ll	ll	ll	lm	ll
Marker120090	hkxhk	kk	hh	kk	kk	kk	hk	kk	hk	kk	hh	kk	hk	hh	kk	kk	kk	kk	kk	kk	kk	kk	hk	hk	hh	kk	kk	hh	hh	hh	hh	hh	hh	hh	hh	kk	hk	kk	kk	kk	hk	kk	kk	kk	kk	kk	kk	kk	kk
Marker469042	nnxnp	nn	np	nn	nn	nn	np	nn	nn	nn	np	nn	nn	np	nn	nn	nn	nn	nn	nn	nn	nn	np	np	np	nn	nn	np	np	np	np	np	np	np	np	nn	np	nn	nn	nn	np	nn	nn	nn	nn	nn	nn	nn	nn
Marker244529	nnxnp	nn	np	nn	nn	nn	np	nn	nn	nn	np	nn	nn	np	nn	nn	nn	nn	nn	nn	nn	nn	np	np	np	nn	nn	np	np	np	np	np	np	np	np	nn	np	nn	nn	nn	np	nn	nn	nn	nn	nn	nn	nn	nn
Marker743514	nnxnp	np	nn	np	np	np	nn	np	np	np	nn	np	np	nn	np	np	np	np	np	np	np	np	np	nn	nn	np	np	nn	nn	nn	nn	nn	nn	nn	nn	np	nn	np	np	np	nn	np	np	np	np	np	np	np	np
Marker146479	nnxnp	nn	np	nn	nn	nn	np	nn	nn	nn	np	nn	nn	np	nn	nn	nn	nn	nn	nn	nn	nn	nn	np	np	nn	nn	np	np	np	np	np	np	np	np	nn	np	nn	nn	nn	np	nn	nn	nn	nn	nn	nn	nn	nn
Marker271246	lmxll	ll	lm	ll	ll	ll	ll	ll	ll	ll	lm	ll	lm	lm	ll	ll	ll	ll	ll	ll	ll	ll	ll	ll	lm	ll	ll	lm	lm	lm	lm	lm	lm	lm	lm	ll	ll	ll	ll	ll	ll	ll	ll	ll	ll	ll	ll	ll	ll
Marker496102	lmxll	ll	lm	ll	ll	ll	ll	ll	ll	ll	lm	ll	lm	lm	ll	ll	ll	ll	ll	ll	ll	ll	ll	ll	lm	ll	ll	lm	lm	lm	lm	lm	lm	lm	lm	ll	ll	ll	ll	ll	ll	ll	ll	ll	ll	ll	ll	ll	ll
Marker181901	lmxll	ll	lm	ll	ll	ll	ll	ll	ll	ll	lm	ll	lm	lm	ll	ll	ll	ll	ll	ll	ll	ll	ll	ll	lm	ll	ll	lm	lm	lm	lm	lm	lm	lm	lm	ll	ll	ll	ll	ll	ll	ll	ll	ll	ll	ll	ll	ll	ll
Marker148885	lmxll	ll	lm	ll	ll	ll	ll	ll	ll	ll	lm	ll	lm	lm	ll	ll	ll	ll	ll	ll	ll	ll	ll	ll	lm	ll	ll	lm	lm	lm	lm	lm	lm	lm	lm	ll	ll	ll	ll	ll	ll	ll	ll	ll	ll	ll	ll	ll	ll
Marker689671	lmxll	ll	lm	ll	ll	ll	ll	ll	ll	ll	lm	ll	lm	lm	ll	ll	ll	ll	ll	ll	ll	ll	ll	ll	lm	ll	ll	lm	lm	lm	lm	lm	lm	lm	lm	ll	ll	ll	ll	ll	ll	ll	ll	ll	ll	ll	ll	ll	ll
Marker246039	nnxnp	nn	np	nn	nn	nn	np	nn	nn	nn	np	nn	nn	np	nn	nn	nn	nn	nn	nn	nn	nn	nn	nn	np	nn	nn	np	np	np	np	np	np	np	np	nn	nn	nn	nn	nn	np	nn	nn	nn	nn	nn	nn	nn	nn
Marker147587	nnxnp	nn	np	nn	nn	nn	np	nn	nn	nn	np	nn	nn	np	nn	nn	nn	nn	nn	nn	nn	nn	nn	nn	np	nn	nn	np	np	np	np	np	np	np	np	nn	nn	nn	nn	nn	np	nn	nn	nn	nn	nn	nn	nn	nn
Marker94367	nnxnp	nn	np	nn	nn	nn	np	nn	nn	nn	np	nn	nn	np	nn	nn	nn	nn	nn	nn	nn	nn	nn	nn	np	nn	nn	np	np	np	np	np	np	np	np	nn	nn	nn	nn	nn	np	nn	nn	nn	nn	nn	nn	nn	nn
Marker165417	lmxll	ll	lm	ll	ll	ll	ll	ll	ll	ll	lm	ll	lm	lm	ll	ll	ll	ll	ll	ll	ll	ll	ll	ll	lm	ll	ll	lm	lm	lm	lm	lm	lm	lm	lm	ll	ll	ll	ll	ll	ll	ll	ll	ll	ll	ll	ll	ll	ll
Marker163766	lmxll	ll	lm	ll	ll	ll	ll	ll	ll	ll	lm	ll	lm	lm	ll	ll	ll	ll	ll	ll	ll	ll	ll	ll	lm	ll	ll	lm	lm	lm	lm	lm	lm	lm	lm	ll	ll	ll	ll	ll	ll	ll	ll	ll	ll	ll	ll	ll	ll
Marker357435	lmxll	lm	ll	lm	lm	lm	lm	lm	lm	lm	ll	lm	ll	ll	lm	lm	lm	lm	lm	lm	lm	lm	lm	lm	ll	lm	lm	ll	ll	ll	ll	ll	ll	ll	ll	lm	lm	lm	lm	lm	lm	lm	lm	lm	lm	lm	lm	lm	lm
Marker478056	lmxll	ll	lm	ll	ll	ll	ll	ll	ll	ll	lm	ll	lm	lm	ll	ll	ll	ll	ll	ll	ll	ll	ll	ll	lm	ll	ll	lm	lm	lm	lm	lm	lm	lm	lm	ll	ll	ll	ll	ll	ll	ll	ll	ll	ll	ll	ll	ll	ll
Marker191139	lmxll	ll	lm	ll	ll	ll	ll	ll	ll	ll	lm	ll	lm	lm	ll	ll	ll	ll	ll	ll	ll	ll	ll	ll	lm	ll	ll	lm	lm	lm	lm	lm	lm	lm	lm	ll	ll	ll	ll	ll	ll	ll	ll	ll	ll	ll	ll	ll	ll
Marker68305	lmxll	ll	lm	ll	ll	ll	ll	ll	ll	ll	lm	ll	lm	lm	ll	ll	ll	ll	ll	ll	ll	ll	ll	ll	lm	ll	ll	lm	lm	lm	lm	lm	lm	lm	lm	ll	ll	ll	ll	ll	ll	ll	ll	ll	ll	ll	ll	ll	ll
Marker268186	hkxhk	hh	kk	hh	hh	hh	hk	hh	hh	hh	kk	hh	hk	kk	hh	hh	hh	hh	hh	hh	hh	hh	hh	hk	kk	hh	hh	kk	kk	kk	kk	kk	kk	kk	kk	hh	hk	hh	hh	hh	hk	hh	hh	hh	hh	hh	hh	hh	hh
Marker421103	lmxll	ll	lm	ll	ll	ll	ll	ll	ll	ll	lm	ll	ll	lm	ll	ll	ll	ll	ll	ll	ll	ll	ll	ll	lm	ll	ll	lm	lm	lm	lm	lm	lm	lm	lm	ll	ll	ll	ll	ll	ll	ll	ll	ll	ll	ll	ll	ll	ll
Marker343478	nnxnp	nn	np	nn	nn	nn	nn	nn	nn	nn	np	nn	nn	np	nn	nn	nn	nn	nn	nn	nn	nn	nn	nn	np	nn	nn	np	np	np	np	np	np	np	np	nn	nn	nn	nn	nn	np	nn	nn	nn	nn	nn	nn	nn	nn
Marker447719	hkxhk	hh	kk	hh	hh	hh	hk	hh	hh	hh	kk	hh	hh	kk	hh	hh	hh	hh	hh	hh	hh	hh	hh	hh	kk	hh	hh	kk	kk	kk	kk	kk	kk	kk	kk	hh	hh	hh	hh	hh	hk	hh	hh	hh	hh	hh	hh	hk	hh
Marker415758	lmxll	ll	lm	ll	ll	ll	ll	ll	ll	ll	lm	ll	ll	lm	ll	ll	ll	ll	ll	ll	ll	ll	ll	ll	lm	ll	ll	lm	lm	lm	lm	lm	lm	lm	lm	ll	ll	ll	ll	ll	ll	ll	ll	ll	ll	ll	ll	lm	ll
Marker271291	lmxll	ll	lm	ll	ll	ll	ll	ll	ll	ll	lm	ll	ll	lm	ll	ll	ll	ll	ll	ll	ll	ll	ll	ll	lm	ll	ll	lm	lm	lm	lm	lm	lm	lm	lm	ll	ll	ll	ll	ll	ll	ll	ll	ll	ll	ll	ll	lm	ll
Marker409040	lmxll	ll	lm	ll	ll	ll	ll	ll	ll	ll	lm	ll	ll	lm	ll	ll	ll	ll	ll	ll	ll	ll	ll	ll	lm	ll	ll	lm	lm	lm	lm	lm	lm	lm	lm	ll	ll	ll	ll	ll	ll	ll	ll	ll	ll	ll	ll	lm	ll
Marker194776	lmxll	ll	lm	ll	ll	ll	ll	ll	ll	ll	lm	ll	ll	lm	ll	ll	ll	ll	ll	ll	ll	ll	ll	ll	lm	ll	ll	lm	lm	lm	lm	lm	lm	lm	lm	ll	ll	ll	ll	ll	ll	ll	ll	ll	ll	ll	ll	lm	ll
Marker261167	lmxll	ll	lm	ll	ll	ll	ll	ll	ll	ll	lm	ll	ll	lm	ll	ll	ll	ll	ll	ll	ll	ll	ll	ll	lm	ll	ll	lm	lm	lm	lm	lm	lm	lm	lm	ll	ll	ll	ll	ll	ll	ll	ll	ll	ll	ll	ll	lm	ll
Marker369711	lmxll	ll	lm	ll	ll	ll	ll	ll	ll	ll	lm	ll	ll	lm	ll	ll	ll	ll	ll	ll	ll	ll	ll	ll	lm	ll	ll	lm	lm	lm	lm	lm	lm	lm	lm	ll	ll	ll	ll	ll	ll	ll	ll	ll	ll	ll	ll	lm	ll
Marker51470	lmxll	ll	lm	ll	ll	ll	ll	ll	ll	ll	lm	ll	ll	lm	ll	ll	ll	ll	ll	ll	ll	ll	ll	ll	lm	ll	ll	lm	lm	lm	lm	lm	lm	lm	lm	ll	ll	ll	ll	ll	ll	ll	ll	ll	ll	ll	ll	lm	ll
Marker77366	nnxnp	nn	np	nn	nn	nn	nn	nn	nn	nn	np	nn	nn	np	nn	nn	nn	nn	nn	nn	nn	nn	nn	nn	np	nn	nn	np	np	np	np	np	np	np	np	nn	nn	nn	nn	nn	np	nn	nn	nn	nn	nn	nn	np	nn
Marker406345	hkxhk	hh	kk	hh	hh	hh	hh	hh	hh	hh	kk	hh	hh	kk	hh	hh	hh	hh	hh	hh	hh	hh	hh	hh	kk	hh	hh	kk	kk	kk	kk	kk	kk	kk	kk	hh	hh	hh	hh	hh	hk	hh	hh	hh	hh	hh	hh	hk	hh
Marker66271	lmxll	ll	lm	ll	ll	ll	ll	ll	ll	ll	lm	ll	ll	lm	ll	ll	ll	ll	ll	ll	ll	ll	ll	ll	lm	ll	ll	lm	lm	lm	lm	lm	lm	lm	lm	ll	ll	ll	ll	ll	ll	ll	ll	ll	ll	ll	ll	lm	ll
Marker271477	nnxnp	nn	np	nn	nn	nn	nn	nn	nn	nn	np	nn	nn	np	nn	nn	nn	nn	nn	nn	nn	nn	nn	nn	np	nn	nn	np	np	np	np	np	np	np	np	nn	nn	nn	nn	nn	np	nn	nn	nn	nn	nn	nn	nn	nn
Marker196110	lmxll	ll	lm	ll	ll	ll	ll	ll	ll	ll	lm	ll	ll	lm	ll	ll	ll	ll	ll	ll	ll	ll	ll	ll	lm	ll	ll	lm	lm	lm	lm	lm	lm	lm	lm	ll	ll	ll	ll	ll	ll	ll	ll	ll	ll	ll	ll	lm	ll
Marker324526	lmxll	ll	lm	ll	ll	ll	ll	ll	ll	ll	lm	ll	ll	lm	ll	ll	ll	ll	ll	ll	ll	ll	ll	ll	lm	ll	ll	lm	lm	lm	lm	lm	lm	lm	lm	ll	ll	ll	ll	ll	ll	ll	ll	ll	ll	ll	ll	lm	ll
Marker324784	lmxll	ll	lm	ll	ll	ll	ll	ll	ll	ll	lm	ll	ll	lm	ll	ll	ll	ll	ll	ll	ll	ll	ll	ll	lm	ll	ll	lm	lm	lm	lm	lm	lm	lm	lm	ll	ll	ll	ll	ll	ll	ll	ll	ll	ll	ll	ll	lm	ll
Marker124019	lmxll	lm	ll	lm	lm	lm	lm	lm	lm	lm	ll	lm	lm	ll	lm	lm	lm	lm	lm	lm	lm	lm	lm	lm	ll	lm	lm	ll	ll	ll	ll	ll	ll	ll	ll	lm	lm	lm	lm	lm	lm	lm	lm	lm	lm	lm	lm	ll	lm
Marker481323	lmxll	ll	lm	ll	ll	ll	ll	ll	ll	ll	lm	ll	ll	lm	ll	ll	ll	ll	ll	ll	ll	ll	ll	ll	lm	ll	ll	lm	lm	lm	lm	lm	lm	lm	lm	ll	ll	ll	ll	ll	ll	ll	ll	ll	ll	ll	ll	lm	ll
Marker431502	nnxnp	nn	np	nn	nn	nn	nn	nn	nn	nn	np	nn	nn	np	nn	nn	nn	nn	nn	nn	nn	nn	nn	nn	np	nn	nn	np	np	np	np	np	np	np	np	nn	nn	nn	nn	nn	np	nn	nn	nn	nn	nn	nn	nn	nn
Marker78199	lmxll	ll	lm	ll	ll	ll	ll	ll	ll	ll	lm	ll	ll	lm	ll	ll	ll	ll	ll	ll	ll	ll	ll	ll	lm	ll	ll	lm	lm	lm	lm	lm	lm	lm	lm	ll	ll	ll	ll	ll	ll	ll	ll	ll	ll	ll	ll	lm	ll
Marker190361	nnxnp	nn	np	nn	nn	nn	nn	nn	nn	nn	np	nn	nn	np	nn	nn	nn	nn	nn	nn	nn	nn	nn	nn	np	nn	nn	np	np	np	np	np	np	np	np	nn	nn	nn	nn	nn	np	nn	nn	nn	nn	nn	nn	nn	nn
Marker455660	lmxll	ll	lm	ll	ll	ll	ll	ll	ll	ll	lm	ll	ll	lm	ll	ll	ll	ll	ll	ll	ll	ll	ll	ll	lm	ll	ll	lm	lm	lm	lm	lm	lm	lm	lm	ll	ll	ll	ll	ll	ll	ll	ll	ll	ll	ll	ll	lm	ll
Marker68115	nnxnp	np	nn	np	np	np	np	np	np	np	nn	np	np	nn	np	np	np	np	np	np	np	np	np	np	nn	np	np	nn	nn	nn	nn	nn	nn	nn	nn	np	np	np	np	np	nn	np	np	np	np	np	np	np	np
Marker46643	lmxll	lm	ll	lm	lm	lm	lm	lm	lm	lm	ll	lm	lm	ll	lm	lm	lm	lm	lm	lm	lm	lm	lm	lm	ll	lm	lm	ll	ll	ll	ll	ll	ll	ll	ll	lm	lm	lm	lm	lm	lm	lm	lm	lm	lm	lm	lm	ll	lm
Marker351903	nnxnp	nn	np	nn	nn	nn	nn	nn	nn	nn	np	nn	nn	np	nn	nn	nn	nn	nn	nn	nn	nn	nn	nn	np	nn	nn	np	np	np	np	np	np	np	np	nn	nn	nn	nn	nn	np	nn	nn	nn	nn	nn	nn	nn	nn
Marker348974	lmxll	lm	ll	lm	lm	lm	lm	lm	lm	lm	ll	lm	lm	ll	lm	lm	lm	lm	lm	lm	lm	lm	lm	lm	ll	lm	lm	ll	ll	ll	ll	ll	ll	ll	ll	lm	lm	lm	lm	lm	lm	lm	lm	lm	lm	lm	lm	ll	lm
Marker105656	lmxll	ll	lm	ll	ll	ll	ll	ll	ll	ll	lm	ll	ll	lm	ll	ll	ll	ll	ll	ll	ll	ll	ll	ll	lm	ll	ll	lm	lm	lm	lm	lm	lm	lm	lm	ll	ll	ll	ll	ll	ll	ll	ll	ll	ll	ll	ll	lm	ll
Marker328461	lmxll	ll	lm	ll	ll	ll	ll	ll	ll	ll	lm	ll	ll	lm	ll	ll	ll	ll	ll	ll	ll	ll	ll	ll	lm	ll	ll	lm	lm	lm	lm	lm	lm	lm	lm	ll	ll	ll	ll	ll	ll	ll	ll	ll	ll	ll	ll	lm	ll
Marker158714	nnxnp	nn	np	nn	nn	nn	nn	nn	nn	nn	np	nn	nn	np	nn	nn	nn	nn	nn	nn	nn	nn	nn	nn	np	nn	nn	np	np	np	np	np	np	np	np	nn	nn	nn	nn	nn	np	nn	nn	nn	nn	nn	nn	nn	nn
Marker317464	nnxnp	nn	np	nn	nn	nn	nn	nn	nn	nn	np	nn	nn	np	nn	nn	nn	nn	nn	nn	nn	nn	nn	nn	np	nn	nn	np	np	np	np	np	np	np	np	nn	nn	nn	nn	nn	np	nn	nn	nn	nn	nn	nn	nn	nn
Marker223686	nnxnp	nn	np	nn	nn	nn	nn	nn	nn	nn	np	nn	nn	np	nn	nn	nn	nn	nn	nn	nn	nn	nn	nn	np	nn	nn	np	np	np	np	np	np	np	np	nn	nn	nn	nn	nn	np	nn	nn	nn	nn	nn	nn	nn	nn
Marker383035	nnxnp	nn	np	nn	nn	nn	nn	nn	nn	nn	np	nn	nn	np	nn	nn	nn	nn	nn	nn	nn	nn	nn	nn	np	nn	nn	np	np	np	np	np	np	np	np	nn	nn	nn	nn	nn	np	nn	nn	nn	nn	nn	nn	nn	nn
Marker292395	hkxhk	hh	kk	hh	hh	hh	hh	hh	hh	hh	kk	hh	hh	kk	hh	hh	hh	hh	hh	hh	hh	hh	hh	hh	kk	hh	hh	kk	kk	kk	kk	kk	kk	kk	kk	hh	hh	hh	hh	hh	hk	hh	hh	hh	hh	hh	hh	hk	hh
Marker180725	nnxnp	nn	np	nn	nn	nn	nn	nn	nn	nn	np	nn	nn	np	nn	nn	nn	nn	nn	nn	nn	nn	nn	nn	np	nn	nn	np	np	np	np	np	np	np	np	nn	nn	nn	nn	nn	np	nn	nn	nn	nn	nn	nn	np	nn
Marker375366	lmxll	ll	lm	ll	ll	ll	ll	ll	ll	ll	lm	ll	ll	lm	ll	ll	ll	ll	ll	ll	ll	ll	ll	ll	lm	ll	ll	lm	lm	lm	lm	lm	lm	lm	lm	ll	ll	ll	ll	ll	ll	ll	ll	ll	ll	ll	ll	lm	ll
Marker307446	lmxll	ll	lm	ll	ll	ll	ll	ll	ll	ll	lm	ll	ll	lm	ll	ll	ll	ll	ll	ll	ll	ll	ll	ll	lm	ll	ll	lm	lm	lm	lm	lm	lm	lm	lm	ll	ll	ll	ll	ll	ll	ll	ll	ll	ll	ll	ll	lm	ll
Marker285083	hkxhk	kk	hh	kk	kk	kk	kk	kk	kk	kk	hh	kk	kk	hh	kk	kk	kk	kk	kk	kk	kk	kk	kk	kk	hh	kk	kk	hh	hh	hh	hh	hh	hh	hh	hh	kk	kk	kk	kk	kk	hk	kk	kk	kk	kk	kk	kk	hh	kk
Marker271413	nnxnp	nn	np	nn	nn	nn	nn	nn	nn	nn	np	nn	nn	np	nn	nn	nn	nn	nn	nn	nn	nn	nn	nn	np	nn	nn	np	np	np	np	np	np	np	np	nn	nn	nn	nn	nn	np	nn	nn	nn	nn	nn	nn	np	nn
Marker178881	lmxll	ll	lm	ll	ll	ll	ll	ll	ll	ll	lm	ll	ll	lm	ll	ll	ll	ll	ll	ll	ll	ll	ll	ll	lm	ll	ll	lm	lm	lm	lm	lm	lm	lm	lm	ll	ll	ll	ll	ll	ll	ll	ll	ll	ll	ll	ll	lm	ll
Marker441049	lmxll	lm	ll	lm	lm	lm	lm	lm	lm	lm	ll	lm	lm	ll	lm	lm	lm	lm	lm	lm	lm	lm	lm	lm	ll	lm	lm	ll	ll	ll	ll	ll	ll	ll	ll	lm	lm	lm	lm	lm	lm	lm	lm	lm	lm	lm	lm	ll	lm
Marker507756	nnxnp	nn	np	nn	nn	nn	nn	nn	nn	nn	np	nn	nn	np	nn	nn	nn	nn	nn	nn	nn	nn	nn	nn	np	nn	nn	np	np	np	np	np	np	np	np	nn	nn	nn	nn	nn	np	nn	nn	nn	nn	nn	nn	np	nn
Marker414492	lmxll	ll	lm	ll	ll	ll	ll	ll	ll	ll	lm	ll	ll	lm	ll	ll	ll	ll	ll	ll	ll	ll	ll	ll	lm	ll	ll	lm	lm	lm	lm	lm	lm	lm	lm	ll	ll	ll	ll	ll	ll	ll	ll	ll	ll	ll	ll	lm	ll
Marker672828	lmxll	ll	lm	ll	ll	ll	ll	ll	ll	ll	lm	ll	ll	lm	ll	ll	ll	ll	ll	ll	ll	ll	ll	ll	lm	ll	ll	lm	lm	lm	lm	lm	lm	lm	lm	ll	ll	ll	ll	ll	ll	ll	ll	ll	ll	ll	ll	lm	ll
Marker271245	hkxhk	kk	hh	kk	kk	kk	kk	kk	kk	kk	hh	kk	kk	hh	kk	kk	kk	kk	kk	kk	kk	kk	kk	kk	hh	kk	kk	hh	hh	hh	hh	hh	hh	hh	hh	kk	kk	kk	kk	kk	hk	kk	kk	kk	kk	kk	kk	hh	kk
Marker353213	nnxnp	nn	np	nn	nn	nn	nn	nn	nn	nn	np	nn	nn	np	nn	nn	nn	nn	nn	nn	nn	nn	nn	nn	np	nn	nn	np	np	np	np	np	np	np	np	nn	nn	nn	nn	nn	np	nn	nn	nn	nn	nn	nn	np	nn
Marker218582	lmxll	ll	lm	ll	ll	ll	ll	ll	ll	ll	lm	ll	ll	lm	ll	ll	ll	ll	ll	ll	ll	ll	ll	ll	lm	ll	ll	lm	lm	lm	lm	lm	lm	lm	lm	ll	ll	ll	ll	ll	lm	ll	ll	ll	ll	ll	ll	lm	ll
Marker74426	lmxll	ll	lm	ll	ll	ll	ll	ll	ll	ll	lm	ll	ll	lm	ll	ll	ll	ll	ll	ll	ll	ll	ll	ll	lm	ll	ll	lm	lm	lm	lm	lm	lm	lm	lm	ll	ll	ll	ll	ll	lm	ll	ll	ll	ll	ll	ll	lm	ll
Marker507432	hkxhk	kk	hh	kk	kk	kk	kk	kk	kk	kk	hh	kk	kk	hh	kk	kk	kk	kk	kk	kk	kk	kk	kk	kk	hh	kk	kk	hh	hh	hh	hh	hh	hh	hh	hh	kk	kk	kk	kk	kk	hh	kk	kk	kk	kk	kk	kk	hh	kk
Marker458481	hkxhk	hh	kk	hh	hh	hh	hh	hh	hh	hh	kk	hh	hh	kk	hh	hh	hh	hh	hh	hh	hh	hh	hh	hh	kk	hh	hh	kk	kk	kk	kk	kk	kk	kk	kk	hh	hh	hh	hh	hh	kk	hh	hh	hh	hh	hh	hh	kk	hh
Marker326061	hkxhk	kk	hh	kk	kk	kk	kk	kk	kk	kk	hh	kk	kk	hh	kk	kk	kk	kk	kk	kk	kk	kk	kk	kk	hh	kk	kk	hh	hh	hh	hh	hh	hh	hh	hh	kk	kk	kk	kk	kk	hh	kk	kk	kk	kk	kk	kk	hh	kk
Marker407492	lmxll	ll	lm	ll	ll	ll	ll	ll	ll	ll	lm	ll	ll	lm	ll	ll	ll	ll	ll	ll	ll	ll	ll	ll	lm	ll	ll	lm	lm	lm	lm	lm	lm	lm	lm	ll	ll	ll	ll	ll	lm	ll	ll	ll	ll	ll	ll	lm	ll
Marker329141	lmxll	ll	lm	ll	ll	ll	ll	ll	ll	ll	lm	ll	ll	lm	ll	ll	ll	ll	ll	ll	ll	ll	ll	ll	lm	ll	ll	lm	lm	lm	lm	lm	lm	lm	lm	ll	ll	ll	ll	ll	lm	ll	ll	ll	ll	ll	ll	lm	ll
Marker183651	lmxll	ll	lm	ll	ll	ll	ll	ll	ll	ll	lm	ll	ll	lm	ll	ll	ll	ll	ll	ll	ll	ll	ll	ll	lm	ll	ll	lm	lm	lm	lm	lm	lm	lm	lm	ll	ll	ll	ll	ll	lm	ll	ll	ll	ll	ll	ll	lm	ll
Marker286320	hkxhk	hh	kk	hh	hh	hh	hh	hh	hh	hh	kk	hh	hh	kk	hh	hh	hh	hh	hh	hh	hh	hh	hh	hh	kk	hh	hh	kk	kk	kk	kk	kk	kk	kk	kk	hh	hh	hh	hh	hh	kk	hh	hh	hh	hh	hh	hh	kk	hh
Marker142448	lmxll	ll	lm	ll	ll	ll	ll	ll	ll	ll	lm	ll	ll	lm	ll	ll	ll	ll	ll	ll	ll	ll	ll	ll	lm	ll	ll	lm	lm	lm	lm	lm	lm	lm	lm	ll	ll	ll	ll	ll	lm	ll	ll	ll	ll	ll	ll	lm	ll
Marker211903	lmxll	ll	lm	ll	ll	ll	ll	ll	ll	ll	lm	ll	ll	lm	ll	ll	ll	ll	ll	ll	ll	ll	ll	ll	lm	ll	ll	lm	lm	lm	lm	lm	lm	lm	lm	ll	ll	ll	ll	ll	lm	ll	ll	ll	ll	ll	ll	lm	ll
Marker299387	hkxhk	kk	hh	kk	kk	kk	kk	kk	kk	kk	hh	kk	kk	hh	kk	kk	kk	kk	kk	kk	kk	kk	kk	kk	hh	kk	kk	hh	hh	hh	hh	hh	hh	hh	hh	kk	kk	kk	kk	kk	hh	kk	kk	kk	kk	kk	kk	hh	kk
Marker235348	nnxnp	nn	np	nn	nn	nn	nn	nn	nn	nn	np	nn	nn	np	nn	nn	nn	nn	nn	nn	nn	nn	nn	nn	np	nn	nn	np	np	np	np	np	np	np	np	nn	nn	nn	nn	nn	np	nn	nn	nn	nn	nn	nn	np	nn
Marker470078	nnxnp	nn	np	nn	nn	nn	nn	nn	nn	nn	np	nn	nn	np	nn	nn	nn	nn	nn	nn	nn	nn	nn	nn	np	nn	nn	np	np	np	np	np	np	np	np	np	nn	nn	nn	nn	np	nn	nn	nn	nn	nn	nn	nn	nn
Marker318337	nnxnp	nn	np	nn	nn	nn	nn	nn	nn	nn	np	nn	nn	np	nn	nn	nn	nn	nn	nn	nn	nn	nn	nn	np	nn	nn	np	np	np	np	np	np	np	np	np	nn	nn	nn	nn	np	nn	nn	nn	nn	nn	nn	nn	nn
Marker85839	nnxnp	nn	np	nn	nn	nn	nn	nn	nn	nn	np	nn	nn	np	nn	nn	nn	nn	nn	nn	nn	nn	nn	nn	np	nn	nn	np	np	np	np	np	np	np	np	nn	nn	nn	nn	nn	np	nn	nn	nn	nn	nn	nn	nn	nn
Marker324614	nnxnp	nn	np	nn	nn	nn	nn	nn	nn	nn	np	nn	nn	np	nn	nn	nn	nn	nn	nn	nn	nn	nn	nn	np	nn	nn	np	np	np	np	np	np	np	np	nn	nn	nn	nn	nn	np	nn	nn	nn	nn	nn	nn	np	nn
Marker703870	nnxnp	nn	np	nn	nn	nn	nn	nn	nn	nn	np	nn	nn	np	nn	nn	nn	nn	nn	nn	nn	nn	nn	nn	np	nn	nn	np	np	np	np	np	np	np	np	nn	nn	nn	nn	nn	np	nn	nn	nn	nn	nn	nn	np	nn
Marker85856	nnxnp	nn	np	nn	nn	nn	nn	nn	nn	nn	np	nn	nn	np	nn	nn	nn	nn	nn	nn	nn	nn	nn	nn	np	nn	nn	np	np	np	np	np	np	np	np	nn	nn	nn	nn	nn	np	nn	nn	nn	nn	nn	nn	np	nn
Marker78524	lmxll	lm	ll	lm	lm	lm	lm	lm	lm	lm	ll	lm	lm	ll	lm	lm	lm	lm	lm	lm	lm	lm	lm	lm	ll	lm	lm	ll	ll	ll	ll	ll	ll	ll	ll	lm	lm	ll	lm	lm	lm	lm	lm	lm	lm	lm	lm	ll	lm
Marker180177	lmxll	ll	lm	ll	ll	ll	ll	ll	ll	ll	lm	ll	ll	lm	ll	ll	ll	ll	ll	ll	ll	ll	ll	ll	lm	ll	ll	lm	lm	lm	lm	lm	lm	lm	lm	ll	ll	lm	ll	ll	ll	ll	ll	ll	ll	ll	ll	lm	ll
Marker130891	lmxll	ll	lm	ll	ll	ll	ll	ll	ll	ll	lm	ll	ll	lm	ll	ll	ll	ll	ll	ll	ll	ll	ll	ll	lm	ll	ll	lm	lm	lm	lm	lm	lm	lm	lm	ll	ll	lm	ll	ll	ll	ll	ll	ll	ll	ll	ll	lm	ll
Marker377143	hkxhk	hk	kk	hh	hh	hh	hh	hh	hh	hh	kk	hh	hh	kk	hh	hh	hh	hh	hh	hh	hh	hh	hh	hh	kk	hh	hh	kk	kk	kk	kk	kk	kk	kk	kk	hk	hh	hk	hh	hh	hk	hh	hh	hh	hk	hh	hh	hk	hh
Marker163481	lmxll	lm	ll	lm	lm	lm	lm	lm	lm	lm	ll	lm	lm	ll	lm	lm	lm	lm	lm	lm	lm	lm	lm	lm	ll	lm	lm	ll	ll	ll	ll	ll	ll	ll	ll	lm	lm	ll	lm	lm	lm	lm	lm	lm	lm	lm	lm	ll	lm
Marker508121	efxeg	ee	ef	eg	eg	eg	eg	eg	eg	eg	ef	eg	eg	ef	eg	eg	eg	eg	eg	eg	eg	eg	eg	eg	ef	eg	eg	ef	ef	ef	ef	ef	ef	ef	ef	ee	eg	fg	eg	eg	ee	eg	eg	eg	ee	eg	eg	fg	eg
Marker105325	lmxll	ll	lm	ll	ll	ll	ll	ll	ll	ll	lm	ll	ll	lm	ll	ll	ll	ll	ll	ll	ll	ll	ll	ll	lm	ll	ll	lm	lm	lm	lm	lm	lm	lm	lm	ll	ll	lm	ll	ll	ll	ll	ll	ll	ll	ll	ll	lm	ll
Marker127065	hkxhk	hk	hh	kk	kk	kk	kk	kk	kk	kk	hh	kk	kk	hh	kk	kk	kk	kk	kk	kk	kk	kk	kk	kk	hh	kk	kk	hh	hh	hh	hh	hh	hh	hh	hh	hk	kk	hk	kk	kk	hk	kk	kk	kk	hk	kk	kk	hk	kk
Marker367633	nnxnp	np	np	nn	nn	nn	nn	nn	nn	nn	np	nn	nn	np	nn	nn	nn	nn	nn	nn	nn	nn	nn	nn	np	nn	nn	np	np	np	np	np	np	np	np	np	nn	nn	nn	nn	np	nn	nn	nn	np	nn	nn	nn	nn
Marker395316	lmxll	ll	lm	ll	ll	ll	ll	ll	ll	ll	lm	ll	ll	lm	ll	ll	ll	ll	ll	ll	ll	ll	ll	ll	lm	ll	ll	lm	lm	lm	lm	lm	lm	lm	lm	ll	ll	lm	ll	ll	ll	ll	ll	ll	ll	ll	ll	lm	ll
Marker46574	lmxll	ll	lm	ll	ll	ll	ll	ll	ll	ll	lm	ll	ll	lm	ll	ll	ll	ll	ll	ll	ll	ll	ll	ll	lm	ll	ll	lm	lm	lm	lm	lm	lm	lm	lm	ll	ll	lm	ll	ll	ll	ll	ll	ll	ll	ll	ll	lm	ll
Marker186367	nnxnp	np	np	nn	nn	nn	nn	nn	nn	nn	np	nn	nn	np	nn	nn	nn	nn	nn	nn	nn	nn	nn	nn	np	nn	nn	np	np	np	np	np	np	np	np	np	nn	nn	nn	nn	np	nn	nn	nn	np	nn	nn	nn	nn
Marker71824	nnxnp	np	np	nn	nn	nn	nn	nn	nn	nn	np	nn	nn	np	nn	nn	nn	nn	nn	nn	nn	nn	nn	nn	np	nn	nn	np	np	np	np	np	np	np	np	np	nn	nn	nn	nn	np	nn	nn	nn	np	nn	nn	nn	nn
Marker266066	nnxnp	np	np	nn	nn	nn	nn	nn	nn	nn	np	nn	nn	np	nn	nn	nn	nn	nn	nn	nn	nn	nn	nn	np	nn	nn	np	np	np	np	np	np	np	np	np	nn	nn	nn	nn	np	nn	nn	nn	np	nn	nn	nn	nn
Marker247262	nnxnp	np	np	nn	nn	nn	nn	nn	nn	nn	np	nn	nn	np	nn	nn	nn	nn	nn	nn	nn	nn	nn	nn	np	nn	np	np	np	np	np	np	np	np	np	np	nn	nn	nn	nn	np	nn	nn	nn	np	nn	nn	nn	nn
Marker300719	nnxnp	np	np	nn	nn	nn	nn	nn	nn	nn	np	nn	nn	np	nn	nn	nn	nn	nn	nn	nn	nn	nn	nn	np	nn	np	np	np	np	np	np	np	np	np	np	nn	nn	nn	nn	np	nn	nn	nn	np	nn	nn	nn	nn
Marker124143	nnxnp	np	np	nn	nn	nn	nn	nn	nn	nn	np	nn	nn	np	nn	nn	nn	nn	nn	nn	nn	nn	nn	nn	np	nn	np	np	np	np	np	np	np	np	np	np	nn	nn	nn	nn	np	nn	nn	nn	np	nn	nn	nn	nn
Marker409418	lmxll	lm	ll	lm	lm	lm	lm	lm	lm	lm	ll	lm	lm	ll	lm	lm	lm	lm	lm	lm	lm	lm	lm	lm	ll	lm	lm	ll	ll	ll	ll	ll	ll	ll	ll	lm	lm	ll	lm	lm	lm	lm	lm	lm	lm	lm	lm	ll	lm
Marker635766	lmxll	lm	ll	lm	lm	lm	lm	lm	lm	lm	ll	lm	lm	ll	lm	lm	lm	lm	lm	lm	lm	lm	lm	lm	ll	lm	lm	ll	ll	ll	ll	ll	ll	ll	ll	lm	lm	ll	lm	lm	lm	lm	lm	lm	lm	lm	lm	ll	lm
Marker16875	lmxll	lm	ll	lm	lm	lm	lm	lm	lm	lm	ll	lm	lm	ll	lm	lm	lm	lm	lm	lm	lm	lm	lm	lm	ll	lm	lm	ll	ll	ll	ll	ll	ll	ll	ll	lm	lm	ll	lm	lm	lm	lm	lm	lm	lm	lm	lm	ll	lm
Marker174898	lmxll	ll	lm	ll	ll	ll	ll	ll	ll	ll	lm	ll	ll	lm	ll	ll	ll	ll	ll	ll	ll	ll	ll	ll	lm	ll	ll	lm	lm	lm	lm	lm	lm	lm	lm	ll	ll	lm	ll	ll	ll	ll	ll	ll	ll	ll	ll	lm	ll
Marker216155	nnxnp	np	np	nn	nn	nn	nn	nn	nn	nn	np	nn	nn	np	nn	nn	nn	nn	nn	nn	nn	nn	nn	nn	np	nn	np	np	np	np	np	np	np	np	np	np	nn	nn	nn	nn	np	nn	nn	nn	np	nn	nn	nn	np
Marker341953	nnxnp	np	np	np	nn	nn	nn	nn	nn	nn	np	nn	nn	np	nn	nn	nn	nn	nn	nn	nn	nn	nn	nn	np	nn	np	np	np	np	np	np	np	np	np	np	nn	nn	nn	nn	np	nn	nn	nn	np	nn	nn	nn	np
Marker194824	nnxnp	nn	nn	nn	np	np	np	np	np	np	nn	np	np	nn	np	np	np	np	np	np	np	np	np	np	nn	np	nn	nn	nn	nn	nn	nn	nn	nn	nn	nn	np	np	np	np	nn	np	np	np	nn	np	np	np	nn
Marker158902	nnxnp	np	np	np	nn	nn	nn	nn	nn	nn	np	nn	nn	np	nn	nn	nn	nn	nn	nn	nn	nn	nn	nn	np	nn	np	np	np	np	np	np	np	np	np	np	nn	nn	nn	nn	np	nn	nn	nn	np	nn	nn	nn	np
Marker558736	lmxll	ll	lm	ll	lm	ll	ll	ll	ll	ll	lm	ll	ll	lm	ll	ll	ll	ll	ll	ll	ll	ll	ll	ll	lm	ll	ll	lm	lm	lm	lm	lm	lm	lm	lm	ll	ll	lm	ll	ll	ll	ll	ll	ll	ll	ll	ll	lm	lm
Marker343079	lmxll	ll	lm	ll	lm	ll	ll	ll	ll	ll	lm	ll	ll	lm	ll	ll	ll	ll	ll	ll	ll	ll	ll	ll	lm	ll	ll	lm	lm	lm	lm	lm	lm	lm	lm	ll	ll	lm	ll	ll	ll	ll	ll	ll	ll	ll	ll	lm	lm
Marker232607	nnxnp	np	np	nn	nn	nn	nn	nn	nn	nn	np	nn	nn	np	nn	nn	nn	nn	nn	nn	nn	nn	nn	nn	np	nn	np	np	np	np	np	np	np	np	np	np	nn	nn	nn	nn	np	nn	nn	nn	np	nn	nn	nn	np
Marker331435	lmxll	ll	lm	ll	lm	ll	ll	lm	ll	ll	lm	ll	ll	lm	ll	ll	ll	ll	ll	ll	ll	ll	ll	ll	lm	ll	ll	lm	lm	lm	lm	lm	lm	lm	lm	ll	ll	lm	ll	ll	ll	ll	ll	ll	ll	ll	ll	lm	lm
Marker314167	lmxll	ll	lm	ll	lm	ll	ll	lm	ll	ll	lm	ll	ll	lm	ll	ll	ll	ll	ll	ll	ll	ll	ll	ll	lm	ll	ll	lm	lm	lm	lm	lm	lm	lm	lm	ll	ll	lm	ll	ll	ll	ll	ll	ll	ll	ll	ll	ll	lm
Marker540221	lmxll	ll	lm	ll	lm	ll	ll	lm	ll	ll	lm	ll	ll	lm	ll	ll	ll	ll	ll	ll	ll	lm	ll	ll	lm	ll	ll	lm	lm	lm	lm	lm	lm	lm	lm	ll	ll	lm	ll	ll	ll	ll	ll	ll	ll	ll	ll	ll	lm
Marker258215	hkxhk	hk	kk	hk	hk	hh	hh	hk	hh	hh	kk	hh	hh	kk	hh	hk	hh	hh	hh	hh	hh	hk	hh	hh	hk	hh	hk	kk	kk	kk	kk	kk	kk	kk	kk	hk	hh	hk	hh	hh	hk	hh	hh	hh	hk	hh	hh	hh	kk
Marker330259	lmxll	ll	lm	ll	lm	ll	ll	lm	ll	ll	lm	ll	ll	lm	ll	ll	ll	ll	ll	ll	ll	lm	ll	ll	lm	ll	ll	lm	lm	lm	lm	lm	lm	lm	lm	ll	ll	lm	ll	ll	ll	ll	ll	ll	ll	ll	ll	lm	lm
Marker280510	lmxll	ll	lm	ll	lm	ll	ll	lm	ll	ll	lm	ll	ll	lm	ll	ll	ll	ll	ll	ll	ll	lm	ll	ll	lm	ll	ll	lm	lm	lm	lm	lm	lm	lm	lm	ll	ll	lm	ll	ll	ll	ll	ll	ll	ll	ll	ll	ll	lm
Marker260542	nnxnp	np	np	np	nn	nn	nn	nn	nn	nn	np	nn	nn	np	nn	np	nn	nn	nn	nn	nn	nn	nn	nn	nn	nn	np	np	np	np	np	np	np	np	np	np	nn	nn	nn	nn	nn	nn	nn	nn	np	nn	nn	nn	np
Marker548373	lmxll	ll	lm	ll	lm	ll	ll	lm	ll	ll	lm	ll	ll	lm	ll	ll	ll	ll	ll	ll	ll	lm	ll	ll	lm	ll	ll	lm	lm	lm	lm	lm	lm	lm	lm	ll	ll	lm	ll	lm	ll	ll	ll	ll	ll	ll	ll	ll	lm
Marker97655	nnxnp	np	np	np	nn	nn	nn	nn	nn	nn	np	nn	nn	np	nn	np	nn	nn	nn	nn	nn	nn	nn	nn	nn	nn	np	np	np	np	np	np	np	np	np	nn	nn	nn	nn	nn	nn	nn	nn	nn	np	nn	nn	nn	np
Marker109764	lmxll	ll	lm	ll	lm	ll	ll	lm	ll	ll	lm	ll	ll	lm	ll	lm	ll	ll	ll	ll	ll	lm	ll	ll	lm	ll	ll	lm	lm	lm	lm	lm	lm	lm	lm	lm	ll	lm	ll	lm	ll	ll	ll	ll	ll	ll	ll	ll	lm
Marker532299	lmxll	ll	lm	ll	lm	ll	ll	lm	ll	ll	lm	ll	ll	lm	ll	lm	ll	ll	ll	ll	ll	lm	ll	ll	lm	ll	ll	lm	lm	lm	lm	lm	lm	lm	lm	lm	ll	lm	ll	lm	ll	ll	ll	ll	ll	ll	ll	ll	lm
Marker49913	lmxll	ll	lm	ll	lm	ll	ll	lm	ll	ll	lm	ll	ll	lm	ll	lm	ll	ll	ll	ll	ll	lm	ll	ll	lm	ll	ll	lm	lm	lm	lm	lm	lm	lm	lm	lm	ll	lm	ll	lm	ll	ll	ll	ll	ll	ll	ll	ll	lm
Marker203730	hkxhk	hk	hh	hk	hk	kk	kk	hk	kk	kk	hh	kk	kk	hh	kk	hh	kk	kk	kk	kk	kk	hk	kk	kk	hk	kk	hk	hh	hh	hh	hh	hh	hh	hh	hh	hk	kk	hk	kk	hk	kk	kk	kk	kk	hk	kk	kk	kk	hh
Marker94464	nnxnp	nn	nn	nn	np	np	np	np	np	np	nn	np	np	nn	np	nn	np	np	np	np	np	np	np	np	np	np	nn	nn	nn	nn	nn	nn	nn	nn	nn	np	np	np	np	np	np	np	np	np	nn	np	np	np	nn
Marker448873	nnxnp	np	np	np	nn	nn	nn	nn	nn	nn	np	nn	nn	np	nn	np	nn	nn	nn	nn	nn	nn	nn	nn	nn	nn	np	np	np	np	np	np	np	np	np	nn	nn	nn	nn	nn	nn	nn	nn	nn	np	nn	nn	nn	np
Marker175113	nnxnp	np	np	np	nn	nn	nn	nn	nn	nn	np	nn	nn	np	nn	np	nn	nn	nn	nn	nn	nn	nn	nn	nn	nn	np	np	np	np	np	np	np	np	np	nn	nn	nn	nn	nn	nn	nn	nn	nn	np	nn	nn	nn	np
Marker344895	nnxnp	np	np	np	nn	nn	nn	nn	nn	nn	np	nn	nn	np	nn	np	nn	nn	nn	nn	nn	nn	nn	nn	nn	nn	np	np	np	np	np	np	np	np	np	nn	nn	nn	nn	nn	nn	nn	nn	nn	np	nn	nn	nn	np
Marker500616	nnxnp	nn	nn	nn	np	np	np	np	np	np	nn	np	np	nn	np	nn	np	np	np	np	np	np	np	np	np	np	nn	nn	nn	nn	nn	nn	nn	nn	nn	np	np	np	np	np	np	np	np	np	nn	np	np	np	nn
Marker268289	nnxnp	np	np	np	nn	nn	nn	nn	nn	nn	np	nn	nn	np	nn	np	nn	nn	nn	nn	nn	nn	nn	nn	nn	nn	np	np	np	np	np	np	np	np	np	nn	nn	nn	nn	nn	nn	nn	nn	nn	np	nn	nn	nn	np
Marker191066	nnxnp	np	np	np	nn	nn	nn	nn	nn	nn	np	nn	nn	np	nn	np	nn	nn	nn	nn	nn	nn	nn	nn	nn	nn	np	np	np	np	np	np	np	np	np	nn	nn	nn	nn	nn	nn	nn	nn	nn	np	nn	nn	nn	np
Marker59477	nnxnp	np	np	np	nn	nn	nn	nn	nn	nn	np	nn	nn	np	nn	np	nn	nn	nn	nn	nn	nn	nn	nn	nn	nn	np	np	np	np	np	np	np	np	np	nn	nn	nn	nn	nn	nn	nn	nn	nn	np	nn	nn	nn	np
Marker119317	nnxnp	np	np	np	nn	nn	nn	nn	nn	nn	np	nn	nn	np	nn	np	nn	nn	nn	nn	nn	nn	nn	nn	nn	nn	np	np	np	np	np	np	np	np	np	nn	nn	nn	nn	nn	nn	nn	nn	nn	np	nn	nn	nn	np
Marker333580	nnxnp	np	np	np	nn	nn	nn	nn	nn	nn	np	nn	nn	np	nn	np	nn	nn	nn	nn	nn	nn	nn	nn	nn	nn	np	np	np	np	np	np	np	np	np	nn	nn	nn	nn	nn	nn	nn	nn	nn	np	nn	nn	nn	np
Marker101421	nnxnp	np	np	np	nn	nn	nn	nn	nn	nn	np	nn	nn	np	nn	np	nn	nn	nn	nn	nn	nn	nn	nn	nn	nn	np	np	np	np	np	np	np	np	np	nn	nn	nn	nn	nn	nn	nn	nn	nn	np	nn	nn	nn	np
Marker252958	nnxnp	np	np	np	nn	nn	nn	nn	nn	nn	np	nn	nn	np	nn	np	nn	nn	nn	nn	nn	nn	nn	nn	nn	nn	np	np	np	np	np	np	np	np	np	nn	nn	nn	nn	nn	nn	nn	nn	nn	np	nn	nn	nn	np
Marker137934	lmxll	lm	lm	lm	lm	ll	lm	lm	ll	ll	lm	ll	ll	lm	ll	lm	ll	ll	ll	ll	ll	lm	ll	ll	lm	ll	ll	lm	lm	lm	lm	lm	lm	lm	lm	lm	ll	lm	ll	lm	ll	ll	ll	ll	ll	ll	ll	ll	lm
Marker507585	lmxll	lm	lm	lm	lm	ll	lm	lm	ll	ll	lm	ll	ll	lm	ll	lm	ll	ll	ll	ll	ll	lm	ll	ll	lm	ll	ll	lm	lm	lm	lm	lm	lm	lm	lm	lm	ll	lm	ll	lm	ll	ll	ll	ll	ll	ll	ll	ll	lm
Marker395646	lmxll	lm	lm	lm	lm	ll	lm	lm	ll	ll	lm	ll	ll	lm	ll	lm	ll	ll	ll	ll	ll	lm	ll	ll	lm	ll	ll	lm	lm	lm	lm	lm	lm	lm	lm	lm	ll	lm	ll	lm	ll	ll	ll	ll	ll	ll	ll	lm	lm
Marker311853	lmxll	lm	lm	lm	lm	ll	lm	lm	ll	lm	lm	ll	ll	lm	ll	lm	ll	ll	ll	ll	ll	lm	ll	ll	lm	ll	ll	lm	lm	lm	lm	lm	lm	lm	lm	lm	ll	lm	ll	lm	ll	ll	ll	ll	ll	ll	ll	lm	lm
Marker29217	lmxll	lm	lm	lm	lm	ll	lm	lm	ll	lm	lm	ll	ll	lm	ll	lm	ll	ll	ll	lm	ll	lm	ll	ll	lm	ll	ll	lm	lm	lm	lm	lm	lm	lm	lm	lm	ll	lm	ll	lm	ll	ll	ll	ll	ll	ll	ll	lm	lm
Marker41513	lmxll	lm	lm	lm	lm	ll	lm	lm	ll	lm	lm	ll	ll	lm	ll	lm	lm	ll	ll	lm	ll	lm	ll	ll	lm	ll	ll	lm	lm	lm	lm	lm	lm	lm	lm	lm	ll	ll	ll	lm	ll	ll	ll	ll	ll	ll	ll	lm	lm
Marker219168	lmxll	lm	lm	lm	lm	lm	lm	lm	ll	lm	lm	ll	ll	lm	ll	lm	lm	ll	lm	lm	ll	lm	ll	ll	lm	ll	ll	lm	lm	lm	lm	lm	lm	lm	lm	lm	ll	ll	ll	lm	ll	ll	ll	ll	ll	ll	ll	lm	lm
Marker144600	lmxll	lm	lm	lm	lm	lm	lm	lm	ll	lm	lm	ll	ll	lm	ll	lm	lm	ll	lm	lm	ll	lm	ll	ll	lm	ll	ll	lm	lm	lm	lm	lm	lm	lm	lm	lm	ll	ll	ll	lm	ll	ll	ll	ll	ll	ll	ll	lm	lm
Marker549392	lmxll	lm	lm	lm	lm	lm	lm	lm	ll	lm	lm	lm	lm	lm	ll	lm	lm	ll	lm	lm	ll	lm	ll	ll	lm	ll	ll	lm	lm	lm	lm	lm	lm	lm	lm	lm	ll	ll	ll	ll	ll	lm	ll	lm	ll	ll	ll	lm	lm
Marker558982	lmxll	lm	lm	lm	lm	lm	lm	lm	ll	lm	lm	lm	lm	lm	ll	lm	lm	ll	lm	lm	ll	lm	ll	ll	lm	ll	ll	lm	lm	lm	lm	lm	lm	lm	lm	lm	ll	ll	ll	ll	ll	lm	ll	lm	ll	ll	ll	lm	lm
Marker209961	lmxll	lm	lm	lm	lm	lm	lm	lm	ll	lm	lm	lm	lm	lm	ll	lm	lm	ll	lm	lm	ll	lm	ll	ll	lm	ll	ll	lm	lm	lm	lm	lm	lm	lm	lm	lm	ll	ll	ll	ll	lm	lm	ll	lm	ll	ll	ll	lm	lm
Marker264100	lmxll	ll	ll	ll	ll	ll	ll	ll	lm	ll	ll	ll	ll	ll	lm	ll	ll	lm	ll	ll	lm	ll	lm	lm	ll	lm	lm	ll	ll	ll	ll	ll	ll	ll	ll	ll	lm	lm	ll	lm	ll	ll	lm	ll	lm	lm	lm	ll	ll
Marker27058	lmxll	lm	lm	lm	lm	lm	lm	lm	ll	lm	lm	lm	lm	lm	ll	lm	lm	ll	lm	lm	ll	lm	ll	ll	lm	ll	ll	lm	lm	lm	lm	lm	lm	lm	lm	lm	ll	ll	lm	ll	lm	lm	ll	lm	ll	ll	ll	lm	lm
Marker335307	lmxll	lm	lm	lm	lm	lm	lm	lm	ll	lm	lm	lm	lm	lm	ll	lm	lm	ll	lm	lm	ll	lm	ll	ll	lm	ll	ll	lm	lm	lm	lm	lm	lm	lm	lm	lm	ll	ll	lm	ll	lm	lm	ll	lm	ll	ll	ll	lm	lm
Marker93864	lmxll	ll	ll	ll	ll	ll	ll	ll	lm	ll	ll	ll	ll	ll	lm	ll	ll	lm	ll	ll	lm	ll	lm	ll	ll	lm	lm	ll	ll	ll	ll	ll	ll	ll	ll	ll	lm	lm	ll	lm	ll	ll	lm	ll	lm	lm	lm	ll	ll
Marker218837	lmxll	lm	lm	lm	lm	lm	lm	lm	ll	lm	lm	lm	lm	lm	ll	lm	lm	ll	lm	lm	ll	lm	ll	lm	lm	ll	ll	lm	ll	lm	lm	lm	lm	lm	lm	lm	ll	ll	lm	ll	lm	lm	ll	lm	ll	ll	ll	lm	lm
Marker276053	lmxll	lm	lm	lm	lm	lm	lm	lm	ll	lm	lm	lm	lm	lm	ll	lm	lm	ll	lm	lm	ll	lm	ll	lm	lm	ll	ll	lm	ll	lm	lm	lm	lm	lm	lm	lm	ll	ll	lm	ll	lm	lm	ll	lm	ll	ll	ll	lm	lm
Marker215313	lmxll	lm	lm	lm	lm	lm	lm	lm	ll	ll	lm	lm	lm	lm	ll	lm	lm	ll	lm	lm	ll	lm	ll	lm	lm	ll	ll	lm	ll	lm	lm	lm	lm	lm	lm	lm	ll	ll	lm	ll	lm	lm	ll	lm	ll	ll	ll	lm	lm
Marker97110	lmxll	lm	lm	lm	lm	lm	lm	lm	ll	ll	lm	lm	lm	lm	ll	lm	lm	ll	lm	lm	ll	lm	ll	lm	lm	ll	ll	lm	ll	lm	lm	lm	lm	lm	lm	lm	ll	ll	lm	ll	lm	lm	ll	lm	ll	ll	ll	lm	lm
Marker404035	lmxll	lm	lm	lm	lm	lm	lm	lm	ll	ll	lm	lm	lm	lm	ll	lm	lm	ll	lm	lm	ll	lm	ll	lm	lm	ll	ll	lm	ll	lm	lm	lm	lm	lm	lm	lm	ll	ll	lm	ll	lm	lm	ll	lm	ll	ll	ll	lm	lm
Marker85366	lmxll	lm	lm	lm	lm	lm	lm	lm	ll	ll	lm	lm	lm	lm	ll	lm	lm	ll	lm	lm	ll	lm	ll	lm	lm	ll	ll	lm	ll	lm	lm	lm	lm	lm	lm	lm	ll	ll	lm	ll	lm	lm	ll	lm	ll	ll	ll	lm	lm
Marker463779	lmxll	lm	lm	lm	lm	lm	lm	lm	ll	ll	lm	lm	lm	lm	ll	lm	lm	ll	lm	lm	ll	lm	ll	lm	lm	ll	ll	lm	ll	lm	lm	lm	lm	lm	lm	lm	ll	ll	lm	ll	lm	lm	ll	lm	ll	ll	ll	lm	lm
Marker205666	lmxll	ll	ll	ll	lm	lm	ll	ll	ll	ll	ll	lm	ll	lm	lm	ll	lm	ll	lm	ll	ll	ll	ll	ll	lm	ll	ll	lm	lm	ll	lm	ll	ll	lm	lm	ll	ll	lm	lm	ll	lm	lm	ll	ll	ll	ll	lm	lm	lm
Marker771630	nnxnp	nn	np	nn	np	np	nn	nn	np	nn	nn	nn	nn	np	nn	nn	nn	np	nn	np	nn	nn	np	nn	np	nn	nn	nn	np	nn	nn	nn	nn	np	np	nn	np	np	np	nn	np	nn	np	nn	nn	nn	np	nn	nn
Marker576939	hkxhk	kk	hk	kk	hh	hh	kk	kk	hk	kk	kk	hk	kk	hh	hk	kk	hk	hk	hk	hk	kk	kk	hk	kk	hh	kk	kk	hk	hh	kk	hk	kk	kk	hh	hh	kk	hk	hh	hh	kk	hh	hk	hk	kk	kk	kk	hh	hk	hk
Marker399684	nnxnp	np	nn	np	nn	nn	np	np	nn	np	np	np	np	nn	np	np	np	nn	np	nn	np	np	nn	np	nn	np	np	np	nn	np	np	np	np	nn	nn	np	nn	nn	nn	np	nn	np	nn	np	np	np	nn	np	np
Marker313204	lmxll	ll	ll	ll	lm	lm	ll	ll	ll	ll	ll	lm	ll	lm	lm	ll	lm	ll	lm	ll	ll	ll	ll	ll	lm	ll	ll	lm	lm	ll	lm	ll	ll	lm	lm	ll	ll	lm	lm	ll	lm	lm	ll	ll	ll	ll	lm	lm	lm
Marker327707	nnxnp	np	nn	np	nn	nn	np	np	nn	np	np	np	np	nn	np	nn	np	nn	np	nn	np	np	nn	np	nn	np	np	np	nn	np	nn	np	np	nn	nn	np	nn	nn	nn	np	nn	np	nn	np	np	np	nn	np	np
Marker581032	nnxnp	np	nn	np	nn	nn	np	np	nn	np	np	np	np	nn	np	nn	np	nn	np	nn	np	np	nn	np	nn	np	np	np	nn	np	nn	np	np	nn	nn	np	nn	nn	nn	np	nn	np	nn	np	np	np	nn	np	np
Marker336653	lmxll	ll	lm	ll	ll	lm	ll	ll	ll	ll	ll	lm	ll	lm	lm	ll	lm	ll	lm	lm	ll	ll	ll	ll	lm	ll	ll	lm	lm	ll	lm	ll	ll	lm	lm	ll	ll	lm	lm	ll	lm	lm	ll	ll	lm	ll	lm	lm	lm
Marker149559	lmxll	lm	ll	lm	lm	ll	lm	lm	lm	lm	lm	ll	lm	ll	ll	lm	ll	lm	ll	ll	lm	lm	lm	lm	ll	lm	lm	ll	ll	lm	ll	lm	lm	ll	ll	lm	lm	ll	ll	lm	ll	ll	lm	lm	ll	lm	ll	ll	ll
Marker260428	lmxll	lm	ll	lm	lm	ll	lm	lm	lm	lm	lm	ll	lm	ll	ll	lm	ll	lm	ll	ll	ll	lm	lm	lm	ll	lm	lm	ll	ll	lm	ll	lm	lm	ll	ll	lm	lm	ll	ll	lm	ll	ll	lm	lm	ll	lm	ll	ll	ll
Marker218197	lmxll	ll	lm	ll	ll	lm	ll	ll	ll	ll	ll	lm	ll	lm	lm	ll	lm	ll	lm	lm	lm	ll	ll	ll	lm	ll	ll	lm	lm	ll	lm	ll	ll	lm	lm	ll	ll	lm	lm	ll	lm	lm	ll	ll	lm	ll	lm	lm	lm
Marker213294	lmxll	lm	ll	lm	lm	ll	lm	lm	lm	lm	lm	ll	lm	ll	ll	lm	ll	lm	ll	ll	ll	lm	lm	lm	ll	lm	lm	ll	ll	lm	ll	lm	lm	ll	ll	lm	lm	ll	ll	lm	ll	ll	lm	lm	ll	lm	ll	ll	ll
Marker291356	lmxll	lm	ll	lm	lm	ll	lm	lm	lm	lm	lm	ll	lm	ll	ll	lm	ll	lm	ll	ll	ll	lm	lm	lm	ll	lm	lm	ll	ll	lm	ll	lm	lm	ll	ll	lm	lm	ll	ll	lm	ll	ll	lm	lm	ll	lm	ll	ll	ll
Marker196144	nnxnp	np	np	np	nn	nn	np	np	np	np	np	nn	np	nn	nn	np	nn	nn	np	nn	np	np	np	np	nn	np	np	np	nn	np	nn	np	np	nn	nn	np	nn	nn	nn	np	nn	nn	np	np	nn	np	nn	np	np
Marker624499	lmxll	lm	ll	lm	lm	ll	lm	lm	lm	lm	lm	ll	lm	ll	ll	lm	ll	lm	ll	ll	ll	lm	lm	ll	ll	lm	lm	ll	ll	lm	ll	lm	lm	ll	ll	lm	lm	ll	ll	lm	ll	ll	lm	lm	ll	lm	ll	ll	ll
Marker295314	lmxll	lm	ll	lm	lm	ll	lm	lm	lm	lm	lm	ll	lm	ll	ll	lm	ll	lm	ll	ll	ll	lm	lm	ll	ll	lm	lm	ll	ll	lm	ll	lm	lm	ll	ll	lm	lm	ll	ll	lm	ll	ll	lm	lm	ll	lm	ll	ll	ll
Marker75827	lmxll	lm	ll	lm	lm	ll	lm	lm	lm	lm	lm	ll	lm	ll	ll	lm	ll	lm	ll	ll	ll	lm	lm	ll	ll	lm	lm	ll	ll	lm	ll	lm	lm	ll	ll	lm	lm	ll	ll	lm	ll	ll	lm	lm	ll	lm	ll	ll	ll
Marker195962	lmxll	lm	ll	lm	lm	ll	lm	lm	lm	lm	lm	ll	lm	ll	ll	lm	ll	lm	ll	ll	ll	lm	lm	ll	ll	lm	lm	ll	ll	lm	ll	lm	lm	ll	ll	lm	lm	ll	ll	lm	ll	ll	lm	lm	ll	lm	ll	ll	ll
Marker158392	lmxll	lm	ll	lm	lm	ll	lm	lm	lm	lm	lm	ll	lm	ll	ll	lm	ll	lm	ll	ll	ll	lm	lm	ll	ll	lm	lm	ll	ll	lm	ll	lm	ll	ll	ll	lm	lm	ll	ll	lm	ll	ll	lm	lm	ll	lm	ll	ll	ll
Marker252455	lmxll	lm	ll	lm	lm	ll	lm	lm	lm	lm	lm	ll	lm	ll	ll	lm	ll	lm	ll	ll	ll	lm	lm	ll	ll	lm	lm	ll	ll	lm	ll	lm	ll	ll	ll	lm	lm	ll	ll	lm	ll	ll	lm	lm	ll	lm	ll	ll	ll
Marker375023	lmxll	ll	lm	ll	ll	lm	ll	ll	ll	ll	ll	lm	ll	lm	lm	ll	lm	ll	lm	lm	lm	ll	ll	lm	lm	ll	ll	lm	lm	ll	lm	ll	lm	lm	lm	ll	ll	lm	lm	ll	lm	lm	ll	ll	lm	ll	lm	lm	lm
Marker445249	lmxll	lm	ll	lm	lm	ll	lm	lm	lm	lm	lm	ll	lm	ll	ll	lm	ll	lm	ll	ll	ll	lm	lm	ll	ll	lm	lm	ll	ll	lm	ll	lm	ll	ll	ll	lm	lm	ll	ll	lm	ll	ll	lm	lm	ll	lm	ll	ll	ll
Marker113695	lmxll	lm	ll	lm	lm	ll	lm	lm	lm	lm	lm	ll	lm	ll	ll	lm	ll	lm	ll	ll	lm	lm	lm	ll	ll	lm	lm	ll	ll	lm	ll	lm	ll	ll	ll	lm	lm	ll	ll	lm	ll	ll	lm	lm	ll	lm	ll	ll	ll
Marker361049	lmxll	ll	lm	ll	ll	lm	ll	ll	ll	ll	ll	lm	ll	lm	lm	ll	lm	ll	lm	lm	ll	ll	ll	lm	lm	ll	ll	lm	lm	ll	lm	lm	lm	lm	lm	ll	ll	lm	lm	ll	lm	lm	ll	ll	lm	ll	lm	lm	lm
Marker218013	nnxnp	np	np	np	nn	np	np	np	np	np	np	nn	np	np	nn	np	nn	nn	np	nn	np	nn	np	np	nn	nn	np	np	nn	np	nn	np	np	nn	np	np	nn	nn	nn	np	nn	nn	np	np	nn	nn	nn	np	np
Marker283446	lmxll	lm	ll	lm	lm	ll	lm	lm	lm	lm	lm	ll	lm	ll	ll	lm	ll	lm	ll	ll	lm	lm	lm	ll	ll	lm	lm	ll	ll	lm	ll	ll	ll	ll	ll	lm	lm	ll	ll	lm	ll	lm	lm	lm	ll	lm	ll	ll	ll
Marker320714	lmxll	lm	ll	lm	lm	ll	lm	lm	lm	lm	lm	ll	lm	ll	ll	lm	ll	lm	ll	ll	lm	lm	lm	ll	ll	lm	lm	ll	ll	lm	ll	ll	ll	ll	ll	lm	lm	ll	ll	lm	ll	lm	lm	lm	ll	lm	ll	ll	ll
Marker53760	efxeg	fg	eg	fg	ef	eg	fg	fg	fg	fg	fg	ee	fg	eg	ee	fg	ee	ef	eg	ee	fg	ef	fg	eg	ee	ef	fg	eg	ee	fg	ee	eg	eg	ee	eg	fg	ef	ee	ee	fg	ee	ef	fg	fg	ee	ef	ee	eg	eg
Marker418230	lmxll	lm	ll	lm	lm	ll	lm	lm	lm	lm	lm	ll	lm	ll	ll	lm	ll	lm	ll	ll	lm	lm	lm	ll	ll	lm	lm	ll	ll	lm	ll	ll	ll	ll	ll	lm	lm	ll	ll	lm	ll	lm	lm	lm	ll	lm	ll	ll	ll
Marker164510	lmxll	ll	lm	ll	ll	lm	ll	ll	ll	ll	ll	lm	ll	lm	lm	ll	lm	ll	lm	lm	ll	ll	ll	lm	lm	ll	ll	lm	lm	lm	lm	lm	lm	lm	lm	ll	lm	lm	lm	ll	lm	ll	ll	ll	lm	ll	lm	lm	lm
Marker156050	lmxll	ll	lm	ll	ll	lm	ll	ll	ll	ll	ll	lm	ll	lm	lm	ll	lm	ll	lm	lm	ll	ll	ll	lm	lm	ll	ll	lm	lm	lm	lm	lm	lm	lm	lm	ll	lm	lm	lm	ll	lm	ll	ll	lm	lm	ll	lm	lm	lm
Marker283403	lmxll	lm	ll	lm	lm	ll	lm	lm	lm	lm	lm	ll	lm	ll	ll	lm	ll	lm	ll	ll	lm	lm	lm	ll	ll	lm	lm	ll	ll	ll	ll	ll	ll	ll	ll	lm	ll	ll	ll	lm	ll	lm	lm	ll	ll	lm	ll	ll	ll
Marker581640	lmxll	lm	ll	lm	lm	ll	lm	lm	lm	lm	lm	ll	lm	ll	ll	lm	ll	lm	ll	ll	lm	lm	lm	ll	ll	lm	lm	ll	ll	ll	ll	ll	ll	ll	ll	lm	ll	ll	ll	lm	ll	lm	lm	ll	ll	lm	ll	ll	ll
Marker560747	lmxll	lm	ll	lm	lm	ll	lm	lm	lm	lm	lm	ll	lm	ll	ll	lm	ll	lm	ll	ll	lm	lm	lm	ll	ll	lm	lm	ll	ll	ll	ll	ll	ll	ll	ll	lm	ll	ll	ll	lm	ll	lm	lm	lm	ll	lm	ll	ll	ll
Marker775980	nnxnp	np	np	np	nn	np	np	np	np	np	np	nn	np	np	nn	np	nn	nn	np	nn	np	nn	np	np	nn	nn	np	np	nn	np	nn	np	np	nn	np	nn	nn	nn	nn	np	nn	nn	nn	np	nn	nn	np	np	np
Marker56194	lmxll	lm	ll	lm	lm	ll	lm	lm	lm	lm	lm	ll	lm	ll	ll	lm	ll	lm	ll	ll	lm	lm	lm	ll	ll	lm	lm	ll	ll	ll	ll	ll	ll	ll	ll	lm	ll	ll	ll	lm	ll	lm	ll	lm	ll	lm	ll	ll	ll
Marker575915	lmxll	ll	lm	ll	ll	lm	ll	ll	ll	ll	ll	lm	ll	lm	lm	ll	lm	ll	lm	lm	ll	ll	ll	lm	lm	ll	ll	lm	lm	lm	lm	lm	lm	lm	lm	ll	lm	lm	lm	ll	lm	ll	lm	ll	lm	ll	lm	lm	lm
Marker380836	lmxll	ll	lm	ll	ll	lm	ll	ll	ll	ll	ll	lm	ll	lm	lm	ll	lm	ll	lm	lm	ll	ll	ll	lm	lm	ll	ll	lm	lm	lm	lm	lm	lm	lm	lm	ll	lm	lm	lm	ll	lm	ll	lm	ll	lm	ll	lm	lm	lm
Marker126088	lmxll	lm	ll	lm	lm	ll	lm	lm	lm	lm	lm	ll	lm	ll	ll	lm	ll	lm	ll	ll	lm	lm	lm	ll	ll	lm	lm	ll	ll	ll	ll	ll	ll	ll	ll	lm	ll	ll	ll	lm	ll	lm	ll	lm	ll	lm	ll	ll	ll
Marker218599	lmxll	ll	lm	ll	ll	lm	ll	ll	ll	ll	ll	lm	ll	lm	lm	ll	ll	ll	lm	lm	ll	ll	ll	lm	lm	ll	ll	lm	lm	lm	lm	lm	lm	lm	lm	ll	lm	lm	lm	ll	lm	ll	lm	ll	lm	ll	lm	lm	lm
Marker433736	lmxll	lm	ll	lm	lm	ll	lm	lm	lm	lm	lm	ll	lm	ll	ll	lm	lm	lm	ll	ll	lm	lm	lm	ll	ll	lm	lm	ll	ll	ll	ll	ll	ll	ll	ll	lm	ll	ll	ll	lm	ll	lm	ll	lm	ll	lm	ll	ll	ll
Marker140966	lmxll	lm	ll	lm	lm	ll	lm	lm	lm	lm	lm	ll	lm	ll	ll	lm	lm	lm	ll	ll	lm	lm	lm	ll	ll	lm	lm	ll	ll	ll	ll	ll	ll	ll	ll	lm	ll	ll	ll	lm	ll	lm	ll	lm	ll	lm	ll	ll	ll
Marker337267	lmxll	ll	lm	ll	ll	lm	ll	ll	ll	ll	ll	lm	ll	lm	lm	ll	ll	ll	lm	lm	ll	ll	ll	lm	lm	ll	ll	lm	lm	lm	lm	lm	lm	lm	lm	ll	lm	lm	lm	ll	lm	ll	lm	ll	lm	ll	lm	lm	lm
Marker534903	lmxll	lm	ll	lm	lm	ll	lm	lm	lm	lm	lm	ll	lm	ll	ll	lm	lm	lm	ll	ll	lm	lm	lm	ll	ll	lm	lm	ll	ll	ll	ll	ll	ll	ll	ll	lm	ll	ll	ll	lm	ll	lm	ll	lm	ll	lm	ll	ll	ll
Marker225349	lmxll	lm	ll	lm	lm	ll	lm	lm	lm	lm	lm	ll	lm	ll	ll	lm	lm	lm	ll	ll	lm	lm	lm	ll	ll	lm	lm	lm	ll	ll	ll	ll	ll	ll	ll	lm	ll	ll	ll	lm	ll	lm	ll	lm	ll	lm	ll	ll	ll
Marker213281	lmxll	ll	lm	ll	ll	lm	ll	ll	ll	ll	ll	lm	ll	lm	lm	ll	ll	ll	lm	lm	ll	ll	ll	lm	lm	ll	ll	ll	lm	lm	lm	lm	lm	lm	lm	ll	lm	lm	lm	ll	lm	ll	lm	ll	lm	ll	lm	lm	lm
Marker62010	nnxnp	nn	nn	nn	np	nn	nn	nn	nn	nn	nn	np	nn	nn	np	nn	np	np	np	np	nn	np	nn	nn	np	np	nn	nn	np	nn	np	nn	nn	nn	nn	np	np	np	np	nn	np	np	np	nn	np	nn	nn	nn	nn
Marker112551	lmxll	lm	ll	lm	lm	ll	lm	lm	lm	lm	lm	ll	lm	ll	ll	lm	lm	lm	ll	ll	ll	lm	lm	ll	ll	lm	lm	lm	ll	ll	ll	ll	ll	ll	ll	lm	ll	ll	ll	lm	ll	lm	ll	lm	ll	lm	ll	ll	ll
Marker56966	lmxll	ll	lm	ll	ll	lm	ll	ll	ll	ll	ll	lm	ll	lm	lm	ll	ll	ll	lm	lm	lm	ll	ll	lm	lm	ll	ll	ll	lm	lm	lm	lm	lm	lm	lm	ll	lm	lm	lm	ll	lm	ll	lm	ll	lm	ll	lm	lm	lm
Marker325616	lmxll	ll	lm	ll	ll	lm	ll	ll	lm	ll	ll	lm	ll	lm	lm	ll	ll	ll	lm	lm	lm	ll	ll	lm	lm	ll	ll	ll	lm	lm	lm	lm	lm	lm	lm	ll	lm	lm	lm	ll	lm	ll	lm	ll	lm	ll	lm	lm	lm
Marker163425	lmxll	ll	lm	ll	ll	lm	ll	ll	lm	ll	ll	lm	ll	lm	lm	ll	ll	ll	lm	lm	lm	ll	ll	lm	lm	ll	ll	ll	lm	lm	lm	lm	lm	lm	lm	ll	lm	lm	lm	ll	lm	ll	lm	ll	lm	ll	lm	lm	lm
Marker166986	lmxll	lm	ll	lm	lm	ll	lm	lm	ll	lm	lm	ll	lm	ll	ll	lm	lm	lm	ll	ll	ll	lm	lm	ll	ll	lm	lm	lm	ll	ll	ll	ll	ll	ll	ll	lm	ll	ll	ll	lm	ll	lm	ll	lm	ll	lm	ll	ll	ll
Marker155846	lmxll	lm	ll	lm	lm	ll	lm	lm	ll	lm	lm	ll	lm	ll	ll	lm	lm	lm	ll	ll	ll	lm	lm	ll	ll	lm	lm	lm	ll	ll	ll	ll	ll	ll	ll	lm	ll	ll	ll	lm	ll	lm	ll	lm	ll	lm	ll	ll	ll
Marker632750	lmxll	lm	ll	lm	lm	ll	lm	lm	ll	lm	lm	ll	lm	ll	ll	lm	lm	lm	ll	ll	ll	lm	ll	ll	ll	lm	lm	lm	ll	ll	ll	ll	ll	ll	ll	lm	ll	ll	ll	lm	ll	lm	ll	lm	ll	lm	ll	ll	ll
Marker215493	lmxll	lm	ll	lm	lm	ll	lm	lm	ll	lm	lm	ll	lm	ll	ll	lm	lm	lm	ll	ll	ll	lm	ll	ll	ll	lm	lm	lm	ll	ll	ll	ll	ll	ll	ll	lm	ll	ll	ll	lm	ll	lm	ll	lm	ll	lm	ll	ll	ll
Marker343758	lmxll	ll	lm	ll	ll	lm	ll	ll	lm	ll	ll	lm	ll	lm	lm	ll	ll	ll	lm	lm	lm	ll	lm	lm	lm	ll	ll	ll	lm	lm	lm	lm	lm	lm	lm	ll	lm	lm	lm	ll	lm	ll	lm	ll	lm	ll	lm	lm	lm
Marker151420	lmxll	lm	ll	lm	lm	ll	lm	lm	ll	lm	lm	ll	lm	ll	ll	lm	lm	lm	ll	ll	ll	lm	ll	ll	ll	lm	lm	lm	ll	ll	ll	ll	ll	ll	ll	lm	ll	ll	ll	lm	ll	lm	ll	lm	ll	lm	ll	ll	ll
Marker450836	lmxll	lm	ll	lm	lm	ll	lm	lm	ll	lm	lm	ll	lm	ll	ll	lm	lm	lm	ll	ll	ll	lm	ll	ll	ll	lm	lm	lm	ll	ll	ll	ll	ll	ll	ll	lm	ll	ll	ll	lm	ll	lm	ll	lm	ll	lm	ll	ll	ll
Marker246954	lmxll	ll	lm	ll	ll	ll	ll	ll	lm	ll	ll	lm	ll	lm	lm	ll	ll	ll	lm	lm	lm	ll	lm	lm	lm	ll	ll	ll	lm	lm	lm	lm	lm	lm	lm	ll	lm	lm	lm	ll	lm	ll	lm	ll	lm	ll	lm	lm	lm
Marker371717	lmxll	lm	ll	lm	lm	lm	lm	lm	ll	lm	lm	ll	lm	ll	ll	lm	lm	lm	ll	ll	ll	lm	ll	ll	ll	lm	lm	lm	ll	ll	ll	ll	ll	ll	ll	lm	ll	ll	ll	lm	ll	lm	ll	lm	ll	lm	ll	ll	ll
Marker77749	lmxll	ll	lm	ll	ll	ll	ll	ll	lm	ll	ll	lm	ll	lm	lm	ll	ll	ll	lm	lm	lm	ll	lm	lm	lm	ll	ll	ll	lm	lm	lm	lm	lm	lm	lm	ll	lm	lm	lm	ll	lm	ll	lm	ll	lm	ll	lm	lm	lm
Marker400178	lmxll	lm	ll	lm	lm	lm	lm	lm	ll	lm	lm	ll	lm	ll	ll	lm	lm	lm	ll	ll	ll	lm	ll	ll	ll	lm	lm	lm	ll	ll	ll	ll	ll	ll	ll	lm	ll	ll	ll	lm	ll	lm	ll	lm	ll	lm	ll	ll	ll
Marker176375	lmxll	lm	ll	lm	lm	lm	lm	lm	ll	lm	lm	ll	lm	ll	ll	lm	lm	lm	ll	ll	ll	lm	ll	ll	ll	lm	lm	lm	ll	ll	ll	ll	ll	ll	ll	lm	ll	ll	ll	lm	ll	lm	ll	lm	ll	lm	ll	ll	ll
Marker234128	nnxnp	nn	nn	nn	nn	nn	nn	nn	nn	nn	nn	np	nn	nn	np	nn	np	nn	np	np	nn	nn	nn	nn	np	np	nn	nn	np	nn	np	nn	nn	nn	np	np	np	np	np	nn	np	np	np	nn	np	nn	nn	nn	nn
Marker348495	nnxnp	np	np	np	np	np	np	np	np	np	np	nn	np	np	nn	np	nn	np	nn	nn	np	np	np	np	nn	nn	np	np	nn	np	nn	np	np	np	nn	nn	nn	nn	nn	np	nn	nn	nn	np	nn	np	np	np	np
Marker280859	nnxnp	np	np	np	np	np	np	np	np	np	np	nn	np	np	nn	np	nn	np	nn	nn	np	np	np	np	nn	nn	np	np	nn	np	nn	np	np	np	nn	nn	nn	nn	nn	np	nn	nn	nn	np	nn	np	np	np	np
Marker446060	nnxnp	np	np	np	np	np	np	np	np	np	np	nn	np	np	nn	np	nn	np	nn	nn	np	np	np	np	nn	nn	np	np	nn	np	nn	np	np	np	nn	nn	nn	nn	nn	np	nn	nn	nn	np	nn	np	np	np	np
Marker176499	nnxnp	np	np	np	np	np	np	np	np	np	np	nn	np	np	nn	np	nn	np	nn	nn	np	np	np	np	nn	nn	np	np	nn	np	nn	np	np	np	nn	nn	nn	nn	nn	np	nn	nn	nn	np	nn	np	np	np	np
Marker288214	nnxnp	nn	nn	nn	nn	nn	nn	nn	nn	nn	nn	np	nn	nn	np	nn	np	nn	np	np	nn	nn	nn	nn	np	np	nn	nn	np	nn	np	nn	nn	nn	np	np	np	np	np	nn	np	np	np	nn	np	nn	nn	nn	nn
Marker79004	nnxnp	nn	nn	nn	nn	nn	nn	nn	nn	nn	nn	np	nn	nn	np	nn	np	nn	np	np	nn	nn	nn	nn	np	np	nn	nn	np	nn	np	nn	nn	nn	np	np	np	np	np	nn	np	np	np	nn	np	nn	nn	nn	nn
Marker551723	nnxnp	np	np	np	np	np	np	np	np	np	np	nn	np	np	nn	np	nn	np	nn	nn	np	np	np	np	nn	nn	np	np	nn	np	nn	np	np	np	nn	nn	nn	nn	nn	np	nn	nn	nn	np	nn	np	np	np	np
Marker73774	efxeg	fg	eg	fg	fg	fg	fg	fg	eg	fg	fg	ee	fg	eg	ee	fg	ef	fg	ee	ee	eg	fg	eg	eg	ee	ef	fg	fg	ee	eg	ee	eg	eg	eg	ee	ef	ee	ee	ee	fg	ee	ef	ee	fg	ee	fg	eg	eg	eg
Marker403560	lmxll	lm	ll	lm	lm	lm	lm	lm	ll	lm	lm	ll	lm	ll	ll	lm	lm	lm	ll	ll	ll	lm	ll	ll	ll	lm	lm	lm	ll	ll	ll	ll	ll	ll	ll	lm	ll	ll	ll	lm	ll	lm	ll	lm	ll	lm	ll	ll	ll
Marker148075	nnxnp	nn	nn	nn	nn	nn	nn	nn	nn	nn	nn	np	nn	nn	np	nn	np	nn	np	np	nn	nn	nn	nn	np	np	nn	nn	np	nn	np	nn	nn	nn	np	np	np	np	np	nn	np	np	np	nn	np	nn	nn	nn	nn
Marker388529	lmxll	ll	lm	ll	ll	ll	ll	ll	lm	ll	ll	lm	ll	lm	lm	ll	ll	ll	lm	lm	lm	ll	lm	lm	lm	ll	ll	ll	lm	lm	lm	lm	lm	lm	lm	ll	lm	lm	lm	ll	lm	ll	lm	ll	lm	ll	lm	lm	lm
Marker269450	hkxhk	hh	hk	hh	hh	hh	hh	hh	hk	hh	hh	kk	hh	hk	kk	hh	hk	hh	kk	kk	hk	hh	hk	hk	kk	hk	hh	hh	kk	hk	kk	hk	hk	hk	kk	hk	kk	kk	kk	hh	kk	hk	kk	hh	kk	hh	hk	hk	hk
Marker257982	lmxll	lm	ll	lm	lm	lm	lm	lm	ll	lm	lm	ll	lm	ll	ll	lm	lm	lm	ll	ll	ll	lm	ll	ll	ll	lm	lm	lm	ll	ll	ll	ll	ll	ll	ll	lm	ll	ll	ll	lm	ll	lm	ll	lm	ll	lm	ll	ll	ll
Marker312180	nnxnp	np	np	np	np	np	np	np	np	np	np	nn	np	np	nn	np	nn	np	nn	nn	np	np	np	np	nn	nn	np	np	nn	np	nn	np	np	np	nn	nn	nn	nn	nn	np	nn	nn	nn	np	nn	np	np	np	np
Marker395212	lmxll	lm	ll	lm	lm	lm	lm	lm	ll	lm	lm	ll	lm	ll	ll	lm	lm	lm	ll	ll	ll	lm	ll	ll	ll	lm	lm	lm	ll	ll	ll	ll	ll	ll	ll	lm	ll	ll	ll	lm	ll	lm	ll	lm	ll	lm	ll	ll	ll
Marker366479	lmxll	lm	ll	lm	lm	lm	lm	lm	ll	lm	lm	ll	lm	ll	ll	lm	lm	lm	ll	ll	ll	lm	ll	ll	ll	lm	lm	lm	ll	ll	ll	ll	ll	ll	ll	lm	ll	ll	ll	lm	ll	lm	ll	lm	ll	lm	ll	ll	ll
Marker314283	lmxll	lm	ll	lm	lm	lm	lm	lm	ll	lm	lm	ll	lm	ll	ll	lm	lm	lm	ll	ll	ll	lm	ll	ll	ll	lm	lm	lm	ll	ll	ll	ll	ll	ll	ll	lm	ll	ll	ll	lm	ll	lm	ll	lm	ll	lm	ll	ll	ll
Marker183425	lmxll	lm	ll	lm	lm	lm	lm	lm	ll	lm	lm	ll	lm	ll	ll	lm	lm	lm	ll	ll	ll	lm	ll	ll	ll	lm	lm	lm	ll	ll	ll	ll	ll	ll	ll	lm	ll	ll	ll	lm	ll	lm	ll	lm	ll	lm	ll	ll	ll
Marker147306	lmxll	lm	ll	lm	lm	lm	lm	lm	ll	lm	lm	ll	lm	ll	ll	lm	lm	lm	ll	ll	ll	lm	ll	ll	ll	lm	lm	lm	ll	ll	ll	ll	ll	ll	ll	lm	ll	ll	ll	lm	ll	lm	ll	lm	ll	lm	ll	ll	ll
Marker113439	lmxll	ll	lm	ll	ll	ll	ll	ll	lm	ll	ll	lm	ll	lm	lm	ll	ll	ll	lm	lm	lm	ll	lm	lm	lm	ll	ll	ll	lm	lm	lm	lm	lm	lm	lm	ll	lm	lm	lm	ll	lm	ll	lm	ll	lm	ll	lm	lm	lm
Marker222563	nnxnp	nn	nn	nn	nn	nn	nn	nn	nn	nn	nn	np	nn	nn	np	nn	np	nn	np	np	nn	nn	nn	nn	np	np	nn	nn	np	nn	np	nn	nn	nn	np	np	np	np	np	nn	np	np	np	nn	np	nn	nn	nn	nn
Marker212820	lmxll	lm	ll	lm	lm	lm	lm	lm	ll	lm	lm	ll	lm	ll	ll	lm	lm	lm	ll	ll	ll	lm	ll	ll	ll	lm	lm	lm	ll	ll	ll	ll	ll	ll	ll	lm	ll	ll	ll	lm	ll	lm	ll	lm	ll	lm	ll	ll	ll
Marker364485	nnxnp	nn	nn	nn	nn	nn	nn	nn	nn	nn	nn	np	nn	nn	np	nn	np	nn	np	np	nn	nn	nn	nn	np	np	nn	nn	np	nn	np	nn	nn	nn	np	np	np	np	np	nn	np	np	np	nn	np	nn	nn	nn	nn
Marker195256	nnxnp	nn	nn	nn	nn	nn	nn	nn	nn	nn	nn	np	nn	nn	np	nn	np	nn	np	np	nn	nn	nn	nn	np	np	nn	nn	np	nn	np	nn	nn	nn	np	np	np	np	np	nn	np	np	np	nn	np	nn	nn	nn	nn
Marker87591	lmxll	ll	lm	ll	ll	ll	ll	ll	lm	ll	ll	lm	ll	lm	lm	ll	ll	ll	lm	lm	lm	ll	lm	lm	lm	ll	ll	ll	lm	lm	lm	lm	lm	lm	lm	ll	lm	lm	lm	ll	lm	ll	lm	ll	lm	ll	lm	lm	lm
Marker574822	lmxll	ll	lm	ll	ll	ll	ll	ll	lm	ll	ll	lm	ll	lm	lm	ll	ll	ll	lm	lm	lm	ll	lm	lm	lm	ll	ll	ll	lm	lm	lm	lm	lm	lm	lm	ll	lm	lm	lm	ll	lm	ll	lm	ll	lm	ll	lm	lm	lm
Marker459403	lmxll	lm	ll	lm	lm	lm	lm	lm	ll	lm	lm	ll	lm	ll	ll	lm	lm	lm	ll	ll	ll	lm	ll	ll	ll	lm	lm	lm	ll	ll	ll	ll	ll	ll	ll	lm	ll	ll	ll	lm	ll	lm	ll	lm	ll	lm	ll	ll	ll
Marker388241	lmxll	lm	ll	lm	lm	lm	lm	lm	ll	lm	lm	ll	lm	ll	ll	lm	lm	lm	ll	ll	ll	lm	ll	ll	ll	lm	lm	lm	ll	ll	ll	ll	ll	ll	ll	lm	ll	ll	ll	lm	ll	lm	ll	lm	ll	lm	ll	ll	ll
Marker163551	lmxll	lm	ll	lm	lm	lm	lm	lm	ll	lm	lm	ll	lm	ll	ll	lm	lm	lm	ll	ll	ll	lm	ll	ll	ll	lm	lm	lm	ll	ll	ll	ll	ll	ll	ll	lm	ll	ll	ll	lm	ll	lm	ll	lm	ll	lm	ll	ll	ll
Marker211226	lmxll	ll	lm	ll	ll	ll	ll	ll	lm	ll	ll	lm	ll	lm	lm	ll	ll	ll	lm	lm	lm	ll	lm	lm	lm	ll	ll	ll	lm	lm	lm	lm	lm	lm	lm	ll	lm	lm	lm	ll	lm	ll	lm	ll	lm	ll	lm	lm	lm
Marker672191	lmxll	ll	lm	ll	ll	ll	ll	ll	lm	ll	ll	lm	ll	lm	lm	ll	ll	ll	lm	lm	lm	ll	lm	lm	lm	ll	ll	ll	lm	lm	lm	lm	lm	lm	lm	ll	lm	lm	lm	ll	lm	ll	lm	ll	lm	ll	lm	lm	lm
Marker131979	lmxll	lm	ll	lm	lm	lm	lm	lm	ll	lm	lm	ll	lm	ll	ll	lm	lm	lm	ll	ll	ll	lm	ll	ll	ll	lm	lm	lm	ll	ll	ll	ll	ll	ll	ll	lm	ll	ll	ll	lm	ll	lm	ll	lm	ll	lm	ll	ll	ll
Marker287329	lmxll	lm	ll	lm	lm	lm	lm	lm	ll	lm	lm	ll	lm	ll	ll	lm	lm	lm	ll	ll	ll	lm	ll	ll	ll	lm	lm	lm	ll	ll	ll	ll	ll	ll	ll	lm	ll	ll	ll	lm	ll	lm	ll	lm	ll	lm	ll	ll	ll
Marker80304	lmxll	lm	ll	lm	lm	lm	lm	lm	ll	lm	lm	ll	lm	ll	ll	lm	lm	lm	ll	ll	ll	lm	ll	ll	ll	lm	lm	lm	ll	ll	ll	ll	ll	ll	ll	lm	ll	ll	ll	lm	ll	lm	ll	lm	ll	lm	ll	ll	ll
Marker117565	nnxnp	np	np	np	np	np	np	np	np	np	np	nn	np	np	nn	np	nn	np	nn	nn	np	np	np	np	nn	nn	np	np	nn	np	nn	np	np	np	nn	nn	nn	nn	nn	np	nn	nn	nn	np	nn	np	np	np	np
Marker159592	nnxnp	nn	nn	nn	nn	nn	nn	nn	nn	nn	nn	np	nn	nn	np	nn	np	nn	np	np	nn	nn	nn	nn	np	np	nn	nn	np	nn	np	nn	nn	nn	np	np	np	np	np	nn	np	np	np	nn	np	nn	nn	nn	nn
Marker104866	lmxll	lm	ll	lm	lm	lm	lm	lm	ll	lm	lm	ll	lm	ll	ll	lm	lm	lm	ll	ll	ll	lm	ll	ll	ll	lm	lm	lm	ll	ll	ll	ll	ll	ll	ll	lm	ll	ll	ll	lm	ll	lm	ll	lm	ll	lm	ll	ll	lm
Marker143014	lmxll	lm	ll	lm	lm	lm	lm	lm	ll	lm	lm	ll	lm	ll	ll	lm	lm	lm	ll	ll	ll	lm	ll	ll	ll	lm	lm	lm	ll	ll	ll	ll	ll	ll	ll	lm	ll	ll	ll	lm	ll	lm	ll	lm	ll	lm	ll	ll	lm
Marker148219	lmxll	lm	ll	lm	lm	lm	lm	lm	ll	lm	lm	ll	lm	ll	ll	lm	lm	lm	ll	ll	ll	lm	ll	ll	ll	lm	lm	lm	ll	ll	ll	ll	ll	ll	ll	lm	ll	ll	ll	lm	ll	lm	ll	lm	ll	lm	ll	ll	lm
Marker221967	lmxll	lm	ll	lm	lm	lm	lm	lm	ll	lm	lm	ll	lm	ll	ll	lm	lm	lm	ll	ll	ll	lm	ll	ll	ll	lm	lm	lm	ll	ll	ll	ll	ll	ll	ll	lm	ll	ll	ll	lm	ll	lm	ll	lm	ll	lm	ll	ll	lm
Marker275450	lmxll	lm	ll	lm	lm	lm	lm	lm	ll	lm	lm	ll	lm	ll	ll	lm	lm	lm	ll	ll	ll	lm	ll	ll	ll	lm	lm	lm	ll	ll	ll	ll	ll	ll	ll	lm	ll	ll	ll	lm	ll	lm	ll	lm	ll	lm	ll	ll	lm
Marker458236	lmxll	lm	ll	lm	lm	lm	lm	lm	ll	lm	lm	ll	lm	ll	ll	lm	lm	lm	ll	ll	ll	lm	ll	ll	ll	lm	lm	lm	ll	ll	ll	ll	ll	ll	ll	lm	ll	ll	ll	lm	ll	lm	ll	ll	ll	lm	ll	ll	lm
Marker460288	lmxll	lm	ll	lm	lm	lm	lm	lm	ll	lm	lm	ll	lm	ll	ll	lm	lm	lm	ll	ll	ll	lm	ll	ll	ll	lm	lm	lm	ll	ll	ll	ll	ll	ll	ll	lm	ll	ll	lm	lm	ll	lm	ll	ll	ll	lm	ll	ll	lm
Marker165908	lmxll	ll	lm	ll	ll	ll	ll	ll	lm	ll	ll	lm	ll	lm	lm	ll	ll	ll	lm	lm	lm	ll	lm	lm	lm	ll	ll	ll	lm	lm	lm	lm	lm	lm	lm	ll	lm	lm	ll	ll	lm	ll	lm	lm	lm	ll	lm	lm	ll
Marker81641	lmxll	ll	lm	ll	ll	ll	ll	ll	lm	ll	ll	lm	ll	lm	lm	ll	ll	ll	lm	lm	lm	ll	lm	lm	lm	ll	ll	ll	lm	lm	lm	lm	lm	lm	lm	ll	lm	lm	ll	ll	lm	lm	lm	lm	lm	ll	lm	lm	ll
Marker133281	hkxhk	kk	hk	kk	kk	kk	kk	kk	hk	kk	kk	hh	kk	hh	hh	kk	hk	kk	hh	hh	hk	kk	hk	hk	hh	hk	kk	kk	hh	hk	hh	hk	hk	hk	hh	kk	hh	hh	hk	kk	hh	hh	hh	hk	hh	kk	hh	hk	hk
Marker130791	lmxll	lm	ll	lm	lm	lm	lm	lm	ll	lm	lm	ll	lm	ll	ll	lm	lm	lm	ll	ll	ll	lm	ll	ll	ll	lm	lm	lm	ll	ll	ll	ll	ll	ll	ll	lm	ll	ll	lm	lm	ll	ll	ll	ll	ll	lm	ll	ll	lm
Marker166947	lmxll	ll	lm	ll	ll	ll	ll	ll	lm	ll	ll	lm	ll	lm	lm	ll	ll	ll	lm	lm	lm	ll	lm	lm	lm	ll	ll	ll	lm	lm	lm	lm	lm	lm	lm	ll	lm	lm	ll	ll	lm	lm	lm	lm	lm	ll	lm	lm	ll
Marker344505	lmxll	lm	ll	lm	lm	lm	lm	lm	ll	lm	lm	ll	lm	ll	ll	lm	lm	lm	ll	ll	ll	lm	ll	ll	ll	lm	lm	lm	ll	ll	ll	ll	ll	ll	ll	lm	ll	ll	lm	lm	ll	ll	ll	ll	ll	lm	ll	ll	lm
Marker305977	lmxll	ll	lm	ll	ll	ll	lm	ll	lm	ll	ll	lm	ll	lm	lm	ll	ll	ll	lm	lm	lm	ll	lm	lm	lm	ll	ll	ll	lm	lm	lm	lm	lm	lm	lm	ll	lm	lm	ll	ll	lm	lm	lm	lm	lm	ll	lm	lm	ll
Marker174069	lmxll	ll	lm	ll	ll	ll	lm	ll	lm	ll	ll	lm	ll	lm	lm	ll	ll	ll	lm	lm	lm	ll	lm	lm	lm	ll	ll	ll	lm	lm	lm	lm	lm	lm	lm	ll	lm	lm	ll	ll	lm	lm	lm	lm	lm	ll	lm	lm	ll
Marker236919	lmxll	ll	lm	ll	ll	ll	lm	ll	lm	ll	ll	lm	ll	lm	lm	ll	ll	ll	lm	lm	lm	ll	lm	lm	lm	ll	ll	ll	lm	lm	lm	lm	lm	lm	lm	ll	lm	lm	ll	ll	lm	lm	lm	lm	lm	ll	lm	lm	ll
Marker296627	lmxll	lm	ll	lm	lm	lm	ll	lm	ll	lm	lm	ll	lm	ll	ll	lm	lm	lm	ll	ll	ll	lm	ll	ll	ll	lm	lm	lm	ll	ll	ll	ll	ll	ll	ll	lm	ll	ll	lm	lm	ll	ll	ll	ll	ll	lm	ll	ll	lm
Marker181325	lmxll	lm	ll	lm	lm	lm	ll	lm	ll	lm	lm	ll	lm	ll	ll	lm	lm	lm	ll	ll	ll	lm	ll	ll	ll	lm	lm	lm	ll	ll	ll	ll	ll	ll	ll	lm	ll	ll	lm	lm	ll	ll	ll	ll	ll	lm	ll	ll	lm
Marker182136	lmxll	lm	ll	lm	lm	lm	ll	lm	ll	lm	lm	ll	lm	ll	ll	lm	lm	lm	ll	ll	ll	lm	ll	ll	ll	lm	lm	lm	ll	ll	ll	ll	ll	ll	ll	lm	ll	ll	lm	lm	ll	ll	ll	ll	ll	lm	ll	ll	lm
Marker155313	lmxll	ll	lm	ll	ll	ll	lm	ll	lm	ll	ll	lm	ll	lm	lm	ll	ll	ll	lm	lm	lm	ll	lm	lm	lm	ll	ll	ll	lm	lm	lm	lm	lm	lm	lm	ll	lm	lm	ll	ll	lm	lm	lm	lm	lm	ll	lm	lm	ll
Marker245655	lmxll	lm	ll	lm	lm	lm	ll	lm	ll	lm	lm	ll	lm	ll	ll	lm	lm	lm	ll	ll	ll	lm	ll	ll	ll	lm	lm	lm	ll	ll	ll	ll	ll	ll	ll	lm	ll	ll	lm	lm	ll	ll	ll	ll	ll	lm	ll	ll	lm
Marker180634	lmxll	lm	ll	lm	lm	lm	ll	lm	ll	lm	lm	ll	lm	ll	ll	lm	lm	lm	ll	ll	ll	lm	ll	ll	ll	lm	lm	lm	ll	ll	ll	ll	ll	ll	ll	lm	ll	ll	lm	lm	ll	ll	ll	ll	ll	lm	ll	ll	lm
Marker629315	lmxll	ll	lm	ll	ll	ll	lm	ll	lm	ll	ll	lm	ll	lm	lm	ll	ll	ll	lm	lm	lm	ll	lm	lm	lm	ll	ll	ll	lm	lm	lm	lm	lm	lm	lm	ll	lm	lm	ll	ll	lm	lm	lm	lm	lm	ll	lm	lm	ll
Marker100994	lmxll	ll	lm	ll	ll	ll	lm	ll	lm	ll	ll	lm	ll	lm	lm	ll	ll	ll	lm	lm	lm	ll	lm	lm	lm	ll	ll	ll	lm	lm	lm	lm	lm	lm	lm	ll	lm	lm	ll	ll	lm	lm	lm	lm	lm	ll	lm	lm	ll
Marker433250	lmxll	lm	ll	lm	lm	lm	ll	lm	ll	lm	lm	ll	lm	ll	ll	lm	lm	lm	ll	ll	ll	lm	ll	ll	ll	lm	lm	lm	ll	ll	ll	ll	ll	ll	ll	lm	ll	ll	lm	lm	ll	ll	ll	ll	ll	lm	ll	ll	lm
Marker292712	lmxll	lm	ll	lm	lm	lm	ll	lm	ll	lm	lm	ll	lm	ll	ll	lm	lm	lm	ll	ll	ll	lm	ll	ll	ll	lm	lm	lm	ll	ll	ll	ll	ll	ll	ll	lm	ll	ll	lm	lm	ll	ll	ll	ll	ll	lm	ll	ll	lm
Marker309671	lmxll	lm	ll	lm	lm	lm	ll	lm	ll	lm	lm	ll	lm	ll	ll	lm	lm	lm	ll	ll	ll	lm	ll	ll	ll	lm	lm	lm	ll	ll	ll	ll	ll	ll	ll	lm	ll	ll	lm	lm	ll	ll	ll	ll	ll	lm	ll	ll	lm
Marker153649	lmxll	ll	lm	ll	ll	ll	lm	ll	lm	ll	ll	lm	ll	lm	lm	ll	ll	ll	lm	lm	lm	ll	lm	lm	lm	ll	ll	ll	lm	lm	lm	lm	lm	lm	lm	ll	ll	lm	ll	ll	lm	lm	lm	lm	lm	ll	lm	lm	ll
Marker304214	lmxll	lm	ll	lm	lm	lm	ll	lm	ll	lm	lm	ll	lm	ll	ll	lm	lm	lm	ll	ll	ll	lm	ll	ll	ll	lm	lm	lm	ll	ll	ll	ll	ll	ll	ll	lm	lm	ll	lm	lm	ll	ll	ll	ll	ll	lm	ll	ll	lm
Marker212868	lmxll	lm	ll	lm	lm	lm	ll	lm	ll	lm	lm	ll	lm	ll	ll	lm	lm	lm	ll	ll	ll	lm	ll	ll	ll	lm	lm	lm	ll	ll	ll	ll	ll	ll	ll	lm	lm	ll	lm	lm	ll	ll	ll	ll	ll	lm	ll	ll	lm
Marker89416	lmxll	lm	ll	lm	lm	lm	ll	lm	ll	lm	lm	ll	lm	ll	ll	lm	lm	lm	ll	ll	ll	lm	ll	ll	ll	lm	lm	lm	ll	ll	ll	ll	ll	ll	ll	lm	lm	ll	lm	lm	ll	ll	ll	ll	ll	lm	ll	ll	lm
Marker303460	lmxll	lm	ll	lm	lm	lm	ll	lm	ll	lm	lm	ll	lm	ll	ll	lm	lm	lm	ll	ll	ll	lm	ll	ll	ll	lm	lm	lm	ll	ll	ll	ll	ll	ll	ll	lm	lm	ll	lm	lm	ll	ll	ll	ll	ll	lm	ll	ll	lm
Marker232712	lmxll	lm	ll	lm	lm	lm	ll	lm	ll	lm	lm	ll	lm	ll	ll	lm	lm	lm	ll	ll	ll	lm	ll	ll	ll	lm	lm	lm	ll	ll	ll	ll	ll	ll	ll	lm	lm	ll	lm	lm	ll	ll	ll	ll	ll	lm	ll	ll	lm
Marker401132	lmxll	ll	lm	ll	ll	ll	lm	ll	lm	ll	ll	lm	ll	lm	lm	ll	ll	ll	lm	lm	lm	ll	lm	lm	lm	ll	ll	ll	lm	lm	lm	lm	lm	lm	lm	ll	ll	lm	ll	ll	lm	lm	lm	lm	lm	ll	lm	lm	ll
Marker160188	lmxll	lm	ll	lm	lm	lm	ll	lm	ll	lm	lm	ll	lm	ll	ll	lm	lm	lm	ll	ll	ll	lm	ll	ll	ll	lm	lm	lm	ll	ll	ll	ll	ll	ll	ll	lm	lm	ll	lm	lm	ll	ll	ll	ll	ll	lm	ll	ll	lm
Marker30780	lmxll	ll	lm	ll	ll	ll	lm	ll	lm	ll	ll	lm	ll	lm	lm	ll	ll	ll	lm	lm	lm	ll	lm	lm	lm	ll	ll	ll	lm	lm	lm	lm	lm	lm	lm	ll	ll	lm	ll	ll	lm	lm	lm	lm	lm	ll	lm	lm	ll
Marker297011	lmxll	lm	ll	lm	lm	lm	ll	lm	ll	lm	lm	ll	lm	ll	ll	lm	lm	lm	ll	ll	ll	lm	ll	ll	ll	lm	lm	lm	ll	ll	ll	ll	ll	ll	ll	lm	lm	ll	lm	lm	ll	ll	ll	ll	ll	lm	ll	ll	lm
Marker307547	lmxll	lm	ll	lm	lm	lm	ll	lm	ll	lm	lm	ll	lm	ll	ll	lm	lm	lm	ll	ll	ll	lm	ll	ll	ll	lm	lm	lm	ll	ll	ll	ll	ll	ll	ll	lm	lm	ll	lm	lm	ll	ll	ll	ll	ll	lm	ll	ll	lm
Marker311709	lmxll	ll	lm	ll	ll	ll	lm	ll	lm	ll	ll	lm	ll	lm	lm	ll	ll	ll	lm	lm	lm	ll	lm	lm	lm	ll	ll	ll	lm	lm	lm	lm	lm	lm	lm	ll	ll	lm	ll	ll	lm	lm	lm	lm	lm	ll	lm	lm	ll
Marker191345	lmxll	lm	ll	lm	lm	lm	ll	lm	ll	lm	lm	ll	lm	ll	ll	lm	lm	lm	ll	ll	ll	lm	ll	ll	ll	lm	lm	lm	ll	ll	ll	ll	ll	ll	ll	lm	lm	ll	lm	lm	ll	ll	ll	ll	ll	lm	ll	ll	lm
Marker216324	lmxll	lm	ll	lm	lm	lm	ll	lm	ll	lm	lm	ll	lm	ll	ll	lm	lm	lm	ll	ll	ll	lm	ll	ll	ll	lm	lm	lm	ll	ll	ll	ll	ll	ll	ll	lm	lm	ll	lm	lm	ll	ll	ll	ll	ll	lm	ll	ll	lm
Marker88680	lmxll	ll	lm	ll	ll	ll	lm	ll	lm	ll	ll	lm	ll	lm	lm	ll	ll	ll	lm	lm	lm	ll	lm	lm	lm	ll	ll	ll	lm	lm	lm	lm	lm	lm	lm	ll	ll	lm	ll	ll	lm	lm	lm	lm	lm	ll	lm	lm	ll
Marker216840	lmxll	lm	ll	lm	lm	lm	ll	lm	ll	lm	lm	ll	lm	ll	ll	lm	lm	lm	ll	ll	ll	lm	ll	ll	ll	lm	lm	lm	ll	ll	ll	ll	ll	ll	ll	lm	lm	ll	lm	lm	ll	ll	ll	ll	ll	lm	ll	ll	lm
Marker323671	lmxll	lm	ll	lm	lm	lm	ll	lm	ll	lm	lm	ll	lm	ll	ll	lm	lm	lm	ll	ll	ll	lm	ll	ll	ll	lm	lm	lm	ll	ll	ll	ll	ll	ll	ll	lm	lm	ll	lm	lm	ll	ll	ll	ll	ll	lm	ll	ll	lm
Marker201936	lmxll	lm	ll	lm	lm	lm	ll	lm	ll	lm	lm	ll	lm	ll	ll	lm	lm	lm	ll	ll	ll	lm	ll	ll	ll	lm	lm	lm	ll	ll	ll	ll	ll	ll	ll	lm	lm	ll	lm	lm	ll	ll	ll	ll	ll	lm	ll	ll	lm
Marker63832	lmxll	lm	ll	lm	lm	lm	ll	lm	ll	lm	lm	ll	lm	ll	ll	lm	lm	lm	ll	ll	ll	lm	ll	ll	ll	lm	lm	lm	ll	ll	ll	ll	ll	ll	ll	lm	lm	ll	lm	lm	ll	ll	ll	ll	ll	lm	ll	ll	lm
Marker261131	lmxll	ll	lm	ll	ll	ll	lm	ll	lm	ll	ll	lm	ll	lm	lm	ll	ll	ll	lm	lm	lm	ll	lm	lm	lm	ll	ll	ll	lm	lm	lm	lm	lm	lm	lm	ll	ll	lm	ll	ll	lm	lm	lm	lm	lm	ll	lm	lm	ll
Marker109215	lmxll	ll	lm	ll	ll	ll	lm	ll	lm	ll	ll	lm	ll	lm	lm	ll	ll	ll	lm	lm	lm	ll	lm	lm	lm	ll	ll	ll	lm	lm	lm	lm	lm	lm	lm	ll	ll	lm	ll	ll	lm	lm	lm	lm	lm	ll	lm	lm	ll
Marker340799	lmxll	lm	ll	lm	lm	lm	ll	lm	ll	lm	lm	ll	lm	ll	ll	lm	lm	lm	ll	ll	ll	lm	ll	ll	ll	lm	lm	lm	ll	ll	ll	ll	ll	ll	ll	lm	lm	ll	lm	lm	ll	ll	ll	ll	ll	lm	ll	ll	lm
Marker401151	lmxll	ll	lm	ll	ll	ll	lm	ll	lm	ll	ll	lm	ll	lm	lm	ll	ll	ll	lm	lm	lm	ll	lm	lm	lm	ll	ll	ll	lm	lm	lm	lm	lm	lm	lm	ll	ll	lm	ll	ll	lm	lm	lm	lm	lm	ll	lm	lm	ll
Marker343066	lmxll	ll	lm	ll	ll	ll	lm	ll	lm	ll	ll	lm	ll	lm	lm	ll	ll	ll	lm	lm	lm	ll	lm	lm	lm	ll	ll	ll	lm	lm	lm	lm	lm	lm	lm	ll	ll	lm	ll	ll	lm	lm	lm	lm	lm	ll	lm	lm	ll
Marker49920	lmxll	ll	lm	ll	ll	ll	lm	ll	lm	ll	ll	lm	ll	lm	lm	ll	ll	ll	lm	lm	lm	ll	lm	lm	lm	ll	ll	ll	lm	lm	lm	lm	lm	lm	lm	ll	ll	lm	ll	ll	lm	lm	lm	lm	lm	ll	lm	lm	ll
Marker512997	lmxll	lm	ll	lm	lm	lm	ll	lm	ll	lm	lm	ll	lm	ll	ll	lm	lm	lm	ll	ll	ll	lm	ll	ll	ll	lm	lm	lm	ll	ll	ll	ll	ll	ll	ll	lm	lm	ll	lm	lm	ll	ll	ll	ll	ll	lm	ll	ll	lm
Marker149504	lmxll	lm	ll	lm	lm	lm	ll	lm	ll	lm	lm	ll	lm	ll	ll	lm	lm	lm	ll	ll	ll	lm	ll	ll	ll	lm	lm	lm	ll	ll	ll	ll	ll	ll	ll	lm	lm	ll	lm	lm	ll	ll	ll	ll	ll	lm	ll	ll	lm
Marker59000	lmxll	lm	ll	lm	lm	lm	ll	lm	ll	lm	lm	ll	lm	ll	ll	lm	lm	lm	ll	ll	ll	lm	ll	ll	ll	lm	lm	lm	ll	ll	ll	ll	ll	ll	ll	lm	lm	ll	lm	lm	ll	ll	ll	ll	ll	lm	ll	ll	lm
Marker271015	lmxll	ll	lm	ll	ll	ll	lm	ll	lm	ll	ll	lm	ll	lm	lm	ll	ll	ll	lm	lm	lm	ll	lm	lm	lm	ll	ll	ll	lm	lm	lm	lm	lm	lm	lm	ll	ll	lm	ll	ll	lm	lm	lm	lm	lm	ll	lm	lm	ll
Marker510416	lmxll	lm	ll	lm	lm	lm	ll	lm	ll	lm	lm	ll	lm	ll	ll	lm	lm	lm	ll	ll	ll	lm	ll	ll	ll	lm	lm	lm	ll	ll	ll	ll	ll	ll	ll	lm	lm	ll	lm	lm	ll	ll	ll	ll	ll	lm	ll	ll	lm
Marker389978	lmxll	lm	ll	lm	lm	lm	ll	lm	ll	lm	lm	ll	lm	ll	ll	lm	lm	lm	ll	ll	ll	lm	ll	ll	ll	lm	lm	lm	ll	ll	ll	ll	ll	ll	ll	lm	lm	ll	lm	lm	ll	ll	ll	ll	ll	lm	ll	ll	lm
Marker232955	lmxll	lm	ll	lm	lm	lm	ll	lm	ll	lm	lm	ll	lm	ll	ll	lm	lm	lm	ll	ll	ll	lm	ll	ll	ll	lm	lm	lm	ll	ll	ll	ll	ll	ll	ll	lm	lm	ll	lm	lm	ll	ll	ll	ll	ll	lm	ll	ll	lm
Marker482235	lmxll	lm	ll	lm	lm	lm	ll	lm	ll	lm	lm	ll	lm	ll	ll	lm	lm	lm	ll	ll	ll	lm	ll	ll	ll	lm	lm	lm	ll	ll	ll	ll	ll	ll	ll	lm	lm	ll	lm	lm	ll	ll	ll	ll	ll	lm	ll	ll	lm
Marker307836	lmxll	lm	ll	lm	lm	lm	ll	lm	ll	lm	lm	ll	lm	ll	ll	lm	lm	lm	ll	ll	ll	lm	ll	ll	ll	lm	lm	lm	ll	ll	ll	ll	ll	ll	ll	lm	lm	ll	lm	lm	ll	ll	ll	ll	ll	lm	ll	ll	lm
Marker116146	lmxll	ll	lm	ll	ll	ll	lm	ll	lm	ll	ll	lm	ll	lm	lm	ll	ll	ll	lm	lm	lm	ll	lm	lm	lm	ll	ll	ll	lm	lm	lm	lm	lm	lm	lm	ll	ll	lm	ll	ll	lm	lm	lm	lm	lm	ll	lm	lm	ll
Marker469167	lmxll	lm	ll	lm	lm	lm	ll	lm	ll	lm	lm	ll	lm	ll	ll	lm	lm	lm	ll	ll	ll	lm	ll	ll	ll	lm	lm	lm	ll	ll	ll	ll	ll	ll	ll	lm	lm	ll	lm	lm	ll	ll	ll	ll	ll	lm	ll	ll	lm
Marker189966	lmxll	lm	ll	lm	lm	lm	ll	lm	ll	lm	lm	ll	lm	ll	ll	lm	lm	lm	ll	ll	ll	lm	ll	ll	ll	lm	lm	lm	ll	ll	ll	ll	ll	ll	ll	lm	lm	ll	lm	lm	ll	ll	ll	ll	ll	lm	ll	ll	lm
Marker463065	lmxll	ll	lm	ll	ll	ll	lm	ll	lm	ll	ll	lm	ll	lm	lm	ll	ll	ll	lm	lm	lm	ll	lm	lm	lm	ll	ll	ll	lm	lm	lm	lm	lm	lm	lm	ll	ll	lm	ll	ll	lm	lm	lm	lm	lm	ll	lm	lm	ll
Marker514830	lmxll	lm	ll	lm	lm	lm	ll	lm	ll	lm	lm	ll	lm	ll	ll	lm	lm	lm	ll	ll	ll	lm	ll	ll	ll	lm	lm	lm	ll	ll	ll	ll	ll	ll	ll	lm	lm	ll	lm	lm	ll	ll	ll	ll	ll	lm	ll	ll	lm
Marker423990	lmxll	lm	ll	lm	lm	lm	ll	lm	ll	lm	lm	ll	lm	ll	ll	lm	lm	lm	ll	ll	ll	lm	ll	ll	ll	lm	lm	lm	ll	ll	ll	ll	ll	ll	ll	lm	lm	ll	lm	lm	ll	ll	ll	ll	ll	lm	ll	ll	lm
Marker467688	lmxll	ll	lm	ll	ll	ll	lm	ll	lm	ll	ll	lm	ll	lm	lm	ll	ll	ll	lm	lm	lm	ll	lm	lm	lm	ll	ll	ll	lm	lm	lm	lm	lm	lm	lm	ll	ll	lm	ll	ll	lm	lm	lm	lm	lm	ll	lm	lm	ll
Marker151614	lmxll	lm	ll	lm	lm	lm	ll	lm	ll	lm	lm	ll	lm	ll	ll	lm	lm	lm	ll	ll	ll	lm	ll	ll	ll	lm	lm	lm	ll	ll	ll	ll	ll	ll	ll	lm	lm	ll	lm	lm	ll	ll	ll	ll	ll	lm	ll	ll	lm
Marker361931	lmxll	ll	lm	ll	ll	ll	lm	ll	lm	ll	ll	lm	ll	lm	lm	ll	ll	ll	lm	lm	lm	ll	lm	lm	lm	ll	ll	ll	lm	lm	lm	lm	lm	lm	lm	ll	ll	lm	ll	ll	lm	lm	lm	lm	lm	ll	lm	lm	ll
Marker293162	lmxll	lm	ll	lm	lm	lm	ll	lm	ll	lm	lm	ll	lm	ll	ll	lm	lm	lm	ll	ll	ll	lm	ll	ll	ll	lm	lm	lm	ll	ll	ll	ll	ll	ll	ll	lm	lm	ll	lm	lm	ll	ll	ll	ll	ll	lm	ll	ll	lm
Marker161508	nnxnp	np	np	np	np	np	np	np	np	np	np	np	np	nn	np	np	nn	np	nn	nn	np	np	np	np	nn	nn	np	np	nn	np	nn	nn	np	np	nn	np	np	nn	np	np	nn	nn	nn	np	nn	np	nn	np	nn
Marker228668	nnxnp	np	np	np	np	np	np	np	np	np	np	np	np	nn	np	np	nn	np	nn	nn	np	np	np	np	nn	nn	np	np	nn	np	nn	nn	np	np	nn	np	np	nn	np	np	nn	nn	nn	np	nn	np	nn	np	nn
Marker192531	nnxnp	np	np	np	np	np	np	np	np	np	np	np	np	nn	np	np	nn	np	nn	nn	np	np	np	np	nn	nn	np	np	nn	np	nn	nn	np	np	nn	np	np	nn	np	np	nn	nn	nn	np	nn	np	nn	np	nn
Marker154220	nnxnp	np	np	np	np	np	np	np	np	np	np	np	np	nn	np	np	nn	np	nn	nn	np	np	np	np	nn	nn	np	np	nn	np	nn	nn	np	np	nn	np	np	nn	np	np	nn	nn	nn	np	nn	np	nn	np	nn
Marker428305	nnxnp	nn	nn	nn	nn	nn	nn	nn	nn	nn	nn	nn	nn	np	nn	nn	np	nn	np	np	nn	nn	nn	nn	np	np	nn	nn	np	nn	np	np	nn	nn	np	nn	nn	np	nn	nn	np	np	np	nn	np	nn	np	nn	np
Marker263581	nnxnp	nn	nn	nn	nn	nn	nn	nn	nn	nn	nn	nn	nn	np	nn	nn	np	nn	np	np	nn	nn	nn	nn	np	np	nn	nn	np	nn	np	np	nn	nn	np	nn	nn	np	nn	nn	np	np	np	nn	np	nn	np	nn	np
Marker92379	nnxnp	nn	nn	nn	nn	nn	nn	nn	nn	nn	nn	nn	nn	np	nn	nn	np	nn	np	np	nn	nn	nn	nn	np	np	nn	nn	np	nn	np	np	nn	nn	np	nn	nn	np	nn	nn	np	np	np	nn	np	nn	np	nn	np
Marker398402	nnxnp	np	np	np	np	np	np	np	np	np	np	np	np	nn	np	np	nn	np	nn	nn	np	np	np	np	nn	nn	np	np	nn	np	nn	nn	np	np	nn	np	np	nn	np	np	nn	nn	nn	np	nn	np	nn	np	nn
Marker339151	hkxhk	hh	hk	hh	hh	hk	hk	hh	hh	hh	hh	hk	hh	kk	hk	hh	hk	hh	kk	kk	hk	hh	hk	hk	kk	hk	hh	hh	kk	hk	kk	kk	hk	hk	kk	hh	hh	kk	hh	hh	kk	kk	kk	hk	kk	hh	kk	hk	hk
Marker114559	lmxll	ll	lm	ll	ll	lm	lm	ll	ll	ll	ll	lm	ll	lm	lm	ll	ll	ll	lm	lm	lm	ll	lm	lm	lm	ll	ll	ll	lm	lm	lm	lm	lm	lm	lm	ll	ll	lm	ll	ll	lm	lm	lm	lm	lm	ll	lm	lm	ll
Marker355482	lmxll	lm	ll	lm	lm	ll	ll	lm	lm	lm	lm	ll	lm	ll	ll	lm	lm	lm	ll	ll	ll	lm	ll	ll	ll	lm	lm	lm	ll	ll	ll	ll	ll	ll	ll	lm	lm	ll	lm	lm	ll	ll	ll	ll	ll	lm	ll	ll	lm
Marker119772	lmxll	lm	ll	lm	lm	ll	ll	lm	lm	lm	lm	ll	lm	ll	ll	lm	lm	lm	ll	ll	ll	lm	ll	ll	ll	lm	lm	lm	ll	ll	ll	ll	ll	ll	ll	lm	lm	ll	lm	lm	ll	ll	lm	ll	ll	lm	ll	ll	lm
Marker132654	lmxll	ll	lm	ll	ll	lm	lm	ll	ll	ll	ll	lm	ll	lm	lm	ll	ll	ll	lm	lm	lm	ll	lm	lm	lm	ll	ll	ll	lm	lm	lm	lm	lm	lm	lm	ll	ll	lm	ll	ll	lm	lm	ll	lm	lm	ll	lm	lm	ll
Marker162391	lmxll	lm	ll	lm	lm	ll	ll	lm	lm	lm	lm	ll	lm	ll	ll	lm	lm	lm	ll	ll	ll	lm	ll	ll	ll	lm	lm	lm	ll	ll	ll	ll	ll	ll	ll	lm	lm	ll	lm	lm	ll	ll	lm	ll	ll	lm	ll	ll	lm
Marker703294	lmxll	lm	ll	lm	lm	ll	ll	lm	lm	lm	lm	ll	lm	ll	ll	lm	lm	lm	ll	ll	ll	lm	ll	ll	ll	lm	lm	lm	ll	ll	ll	ll	ll	ll	ll	lm	lm	ll	lm	lm	ll	ll	lm	ll	ll	lm	ll	ll	lm
Marker299592	lmxll	ll	lm	ll	ll	lm	lm	ll	ll	ll	ll	lm	ll	lm	lm	ll	ll	ll	lm	lm	lm	ll	lm	lm	lm	ll	ll	ll	lm	lm	lm	lm	lm	lm	lm	ll	ll	lm	ll	ll	lm	lm	ll	lm	lm	ll	lm	lm	ll
Marker214089	lmxll	lm	ll	lm	lm	ll	ll	lm	lm	lm	lm	ll	lm	ll	ll	lm	lm	lm	ll	ll	ll	lm	ll	ll	ll	lm	lm	lm	ll	ll	ll	ll	ll	ll	ll	lm	lm	ll	lm	lm	ll	ll	lm	ll	ll	lm	ll	ll	lm
Marker336071	lmxll	ll	lm	ll	ll	lm	lm	ll	ll	ll	ll	lm	ll	lm	lm	ll	ll	ll	lm	lm	lm	ll	lm	lm	lm	ll	ll	ll	lm	lm	lm	lm	lm	lm	lm	ll	ll	lm	ll	ll	lm	lm	ll	lm	lm	ll	lm	lm	ll
Marker219810	lmxll	lm	ll	lm	lm	ll	ll	lm	lm	lm	lm	ll	lm	ll	ll	lm	lm	lm	ll	ll	ll	lm	ll	ll	ll	lm	lm	lm	ll	ll	ll	ll	ll	ll	ll	lm	lm	ll	lm	lm	ll	ll	lm	ll	ll	lm	ll	ll	lm
Marker417987	lmxll	lm	ll	lm	lm	ll	ll	lm	lm	lm	lm	ll	lm	ll	ll	lm	lm	lm	ll	ll	ll	lm	ll	ll	ll	lm	lm	lm	ll	ll	ll	ll	ll	ll	ll	lm	lm	ll	lm	lm	ll	ll	lm	ll	ll	lm	ll	ll	lm
Marker57371	lmxll	lm	ll	lm	lm	ll	ll	lm	lm	lm	lm	ll	lm	ll	ll	lm	lm	lm	ll	ll	ll	lm	ll	ll	ll	lm	lm	lm	ll	ll	ll	ll	ll	ll	ll	lm	lm	ll	lm	lm	ll	ll	lm	ll	ll	lm	ll	ll	lm
Marker136697	lmxll	lm	ll	lm	lm	ll	ll	lm	lm	lm	lm	ll	lm	ll	ll	lm	lm	lm	ll	ll	ll	lm	ll	ll	ll	lm	lm	lm	ll	ll	ll	ll	ll	ll	ll	lm	lm	ll	lm	lm	ll	ll	lm	ll	ll	lm	ll	ll	lm
Marker473161	lmxll	lm	ll	lm	lm	ll	ll	lm	lm	lm	lm	ll	lm	ll	ll	lm	lm	lm	ll	ll	ll	lm	ll	ll	ll	lm	lm	lm	ll	ll	ll	ll	ll	ll	ll	lm	lm	ll	lm	lm	ll	ll	lm	ll	ll	lm	ll	ll	lm
Marker157921	lmxll	ll	lm	ll	ll	lm	lm	ll	ll	ll	ll	lm	ll	lm	lm	ll	ll	ll	lm	lm	ll	ll	lm	lm	lm	ll	ll	ll	lm	lm	lm	lm	lm	lm	lm	ll	ll	lm	ll	ll	lm	lm	ll	lm	lm	ll	lm	lm	ll
Marker298029	lmxll	ll	lm	ll	ll	lm	lm	ll	ll	ll	ll	lm	ll	lm	lm	ll	ll	ll	lm	lm	ll	ll	lm	lm	lm	ll	ll	ll	lm	lm	lm	lm	lm	lm	lm	ll	ll	lm	ll	ll	lm	lm	ll	lm	lm	ll	lm	lm	ll
Marker306823	lmxll	lm	ll	lm	lm	ll	ll	lm	lm	lm	lm	ll	lm	ll	ll	lm	lm	lm	ll	ll	lm	lm	ll	ll	ll	lm	lm	lm	ll	ll	ll	ll	ll	ll	ll	lm	lm	ll	lm	lm	ll	ll	lm	ll	ll	lm	ll	ll	lm
Marker176347	lmxll	lm	ll	lm	lm	ll	ll	lm	lm	lm	lm	ll	lm	ll	ll	lm	lm	lm	ll	ll	lm	lm	ll	ll	ll	lm	lm	lm	ll	ll	ll	ll	ll	ll	ll	lm	lm	ll	lm	lm	ll	ll	lm	ll	ll	lm	ll	ll	lm
Marker305614	lmxll	lm	ll	lm	lm	ll	ll	lm	lm	lm	lm	ll	lm	ll	ll	lm	lm	lm	ll	ll	lm	lm	ll	ll	ll	lm	lm	lm	ll	ll	ll	ll	ll	ll	ll	lm	lm	ll	lm	lm	ll	ll	lm	ll	ll	lm	ll	ll	lm
Marker402565	hkxhk	hh	hk	hh	hh	hk	hk	hh	hh	hh	hh	hk	hh	kk	hk	hh	hk	hh	kk	kk	hh	hh	hk	hk	kk	hk	hh	hh	kk	hk	kk	kk	hk	hk	kk	hh	hh	kk	hh	hh	kk	kk	hk	hk	kk	hh	kk	hk	hk
Marker413207	nnxnp	nn	nn	nn	nn	nn	nn	nn	nn	nn	nn	nn	nn	np	nn	nn	np	nn	np	np	nn	nn	nn	nn	np	np	nn	nn	np	nn	np	np	nn	nn	np	nn	nn	np	nn	nn	np	np	np	nn	np	nn	np	nn	np
Marker460951	nnxnp	np	np	np	np	np	np	np	np	np	np	np	np	nn	np	np	nn	np	nn	nn	np	np	np	np	nn	nn	np	np	nn	np	nn	nn	np	np	nn	np	np	nn	np	np	nn	nn	nn	np	nn	np	nn	np	nn
Marker88742	nnxnp	nn	nn	nn	nn	nn	nn	nn	nn	nn	nn	nn	nn	np	nn	nn	np	nn	np	np	nn	nn	nn	nn	np	np	nn	nn	np	nn	np	np	nn	nn	np	nn	nn	np	nn	nn	np	np	np	nn	np	nn	np	nn	np
Marker638102	lmxll	ll	lm	ll	ll	lm	lm	ll	ll	ll	ll	ll	ll	lm	lm	ll	ll	ll	lm	lm	ll	ll	lm	lm	lm	ll	ll	ll	lm	lm	lm	lm	lm	lm	lm	ll	ll	lm	ll	ll	lm	lm	ll	lm	lm	ll	lm	lm	ll
Marker239825	lmxll	ll	lm	ll	ll	lm	lm	ll	ll	ll	ll	ll	ll	lm	lm	ll	ll	ll	lm	lm	ll	ll	lm	lm	lm	ll	ll	ll	lm	lm	lm	lm	lm	lm	lm	ll	ll	lm	lm	ll	ll	lm	ll	lm	lm	ll	lm	lm	ll
Marker329347	lmxll	ll	lm	ll	ll	lm	lm	ll	ll	ll	ll	ll	ll	lm	lm	ll	ll	ll	lm	lm	ll	ll	lm	lm	lm	ll	ll	ll	lm	lm	lm	lm	lm	lm	lm	ll	ll	lm	lm	ll	ll	lm	ll	lm	lm	ll	lm	lm	ll
Marker210994	lmxll	ll	lm	ll	ll	lm	lm	ll	ll	ll	ll	ll	ll	lm	lm	ll	ll	ll	lm	lm	ll	ll	lm	lm	lm	ll	ll	ll	lm	lm	lm	lm	lm	lm	lm	ll	ll	lm	lm	ll	ll	lm	ll	lm	lm	ll	lm	lm	ll
Marker164264	lmxll	ll	lm	ll	ll	lm	lm	ll	ll	ll	ll	ll	ll	lm	lm	ll	ll	ll	lm	lm	ll	ll	ll	lm	lm	ll	ll	ll	lm	lm	lm	lm	lm	lm	lm	ll	ll	lm	lm	ll	ll	lm	ll	lm	lm	ll	lm	lm	ll
Marker110937	lmxll	lm	ll	lm	lm	ll	ll	lm	lm	lm	lm	lm	lm	ll	ll	lm	lm	lm	ll	ll	lm	lm	lm	ll	ll	lm	lm	lm	ll	ll	ll	ll	ll	ll	ll	lm	lm	ll	ll	lm	lm	ll	lm	ll	ll	lm	ll	ll	lm
Marker430312	lmxll	lm	ll	lm	lm	ll	ll	lm	lm	lm	lm	lm	lm	ll	ll	lm	lm	lm	ll	ll	lm	lm	ll	ll	ll	lm	lm	lm	ll	ll	ll	ll	ll	ll	ll	lm	lm	ll	lm	lm	ll	ll	lm	ll	ll	lm	ll	ll	lm
Marker402369	lmxll	lm	ll	lm	lm	ll	ll	lm	lm	lm	lm	lm	lm	ll	ll	lm	lm	lm	ll	ll	lm	lm	ll	ll	ll	lm	lm	lm	ll	ll	ll	ll	ll	ll	ll	lm	lm	ll	lm	lm	ll	ll	lm	ll	ll	lm	ll	ll	lm
Marker1022909	lmxll	ll	lm	ll	ll	lm	lm	ll	ll	ll	ll	ll	ll	lm	lm	ll	ll	ll	lm	lm	ll	ll	lm	lm	lm	ll	ll	ll	lm	lm	lm	lm	lm	lm	lm	ll	ll	lm	ll	ll	lm	lm	ll	lm	lm	ll	lm	lm	ll
Marker425835	lmxll	lm	ll	lm	lm	ll	ll	lm	lm	lm	lm	lm	lm	ll	ll	lm	lm	lm	ll	ll	lm	lm	ll	ll	ll	lm	lm	lm	ll	ll	ll	ll	ll	ll	ll	lm	lm	ll	lm	lm	ll	ll	lm	ll	ll	lm	ll	ll	lm
Marker300697	lmxll	lm	ll	lm	lm	ll	ll	lm	lm	lm	lm	lm	lm	ll	ll	lm	lm	lm	ll	ll	lm	lm	ll	ll	ll	lm	lm	lm	ll	ll	ll	ll	ll	ll	ll	lm	lm	ll	lm	lm	ll	ll	lm	ll	ll	lm	ll	ll	lm
Marker641058	lmxll	lm	ll	lm	lm	ll	ll	lm	lm	lm	lm	lm	lm	ll	ll	lm	lm	lm	ll	ll	lm	lm	ll	ll	ll	lm	lm	lm	ll	ll	ll	ll	ll	ll	ll	lm	lm	ll	lm	lm	ll	ll	lm	ll	ll	lm	ll	ll	lm
Marker438443	lmxll	lm	ll	lm	lm	ll	ll	lm	lm	lm	lm	lm	lm	ll	ll	lm	lm	lm	ll	ll	lm	lm	ll	ll	ll	lm	lm	lm	ll	ll	ll	ll	ll	ll	ll	lm	lm	ll	lm	lm	ll	ll	lm	ll	ll	lm	ll	ll	lm
Marker572478	lmxll	ll	lm	ll	ll	lm	lm	ll	ll	ll	ll	ll	ll	lm	lm	ll	ll	ll	lm	lm	ll	ll	lm	lm	lm	ll	ll	ll	lm	lm	lm	lm	lm	lm	lm	ll	ll	lm	ll	ll	lm	lm	ll	lm	lm	ll	lm	lm	ll
Marker520630	lmxll	ll	lm	ll	ll	lm	lm	ll	ll	ll	ll	ll	ll	lm	lm	ll	ll	ll	lm	lm	ll	ll	lm	lm	lm	ll	ll	ll	lm	lm	lm	lm	lm	lm	lm	ll	ll	lm	ll	ll	lm	lm	ll	lm	lm	ll	lm	lm	ll
Marker50081	lmxll	ll	lm	ll	ll	lm	lm	ll	ll	ll	ll	ll	ll	lm	lm	ll	ll	ll	lm	lm	ll	ll	lm	lm	lm	ll	ll	ll	lm	lm	lm	lm	lm	lm	lm	ll	ll	lm	ll	ll	lm	lm	ll	lm	lm	ll	lm	lm	ll
Marker79723	lmxll	lm	ll	lm	lm	ll	ll	lm	lm	lm	lm	lm	lm	ll	ll	lm	lm	lm	ll	ll	lm	lm	ll	ll	ll	lm	lm	lm	ll	ll	ll	ll	ll	ll	ll	lm	lm	ll	lm	lm	ll	ll	lm	ll	ll	lm	ll	ll	lm
Marker271806	lmxll	lm	ll	lm	lm	ll	ll	lm	lm	lm	lm	lm	lm	ll	ll	lm	lm	lm	ll	ll	lm	lm	ll	ll	ll	lm	lm	lm	ll	ll	ll	ll	ll	ll	ll	lm	lm	ll	lm	lm	ll	ll	lm	ll	ll	lm	ll	ll	lm
Marker547875	lmxll	ll	lm	ll	ll	lm	lm	ll	ll	ll	ll	ll	ll	lm	lm	ll	ll	ll	lm	lm	ll	ll	lm	lm	lm	ll	ll	ll	lm	lm	lm	lm	lm	lm	lm	ll	ll	lm	lm	ll	lm	lm	ll	lm	lm	ll	lm	lm	ll
Marker108245	lmxll	lm	ll	lm	lm	ll	ll	lm	lm	lm	lm	lm	lm	ll	ll	lm	lm	lm	ll	ll	lm	lm	ll	ll	ll	lm	lm	lm	ll	ll	ll	ll	ll	ll	ll	lm	lm	ll	ll	lm	lm	ll	lm	ll	ll	lm	ll	ll	lm
Marker271458	lmxll	ll	lm	ll	ll	lm	lm	ll	ll	ll	ll	ll	ll	lm	lm	ll	ll	ll	lm	lm	ll	ll	lm	lm	lm	ll	ll	ll	lm	lm	lm	lm	lm	lm	lm	ll	ll	lm	lm	ll	ll	lm	ll	lm	lm	ll	lm	lm	ll
Marker339149	lmxll	lm	ll	lm	lm	ll	ll	lm	lm	lm	lm	lm	lm	ll	ll	lm	lm	lm	ll	ll	lm	lm	lm	ll	ll	lm	lm	lm	ll	ll	ll	ll	ll	ll	ll	lm	lm	ll	ll	lm	lm	ll	lm	ll	ll	lm	ll	ll	lm
Marker404571	lmxll	lm	ll	lm	lm	ll	ll	lm	lm	lm	lm	lm	lm	ll	ll	lm	lm	lm	ll	ll	lm	lm	lm	ll	ll	lm	lm	lm	ll	ll	ll	ll	ll	ll	ll	lm	lm	ll	ll	lm	lm	ll	lm	ll	ll	lm	ll	ll	lm
Marker38269	lmxll	lm	ll	lm	lm	ll	ll	lm	lm	lm	lm	lm	lm	ll	ll	lm	lm	lm	ll	ll	lm	lm	lm	ll	ll	lm	lm	lm	ll	ll	ll	ll	ll	ll	ll	lm	lm	lm	ll	lm	lm	ll	lm	ll	ll	lm	ll	ll	lm
Marker143799	lmxll	lm	ll	lm	lm	ll	ll	lm	lm	lm	lm	lm	lm	ll	ll	lm	lm	lm	ll	ll	lm	lm	lm	ll	ll	lm	lm	lm	ll	ll	ll	ll	ll	ll	ll	lm	lm	lm	ll	lm	lm	ll	lm	ll	ll	lm	ll	ll	lm
Marker91272	lmxll	ll	lm	ll	ll	lm	lm	ll	ll	ll	ll	ll	ll	lm	lm	ll	ll	ll	lm	lm	ll	ll	ll	lm	lm	ll	ll	ll	lm	lm	lm	lm	lm	lm	lm	ll	ll	ll	lm	ll	ll	lm	ll	lm	lm	ll	lm	lm	ll
Marker178911	lmxll	lm	ll	lm	lm	ll	ll	lm	lm	lm	lm	lm	lm	ll	ll	lm	lm	lm	ll	ll	lm	lm	lm	ll	ll	lm	lm	lm	ll	ll	ll	ll	ll	ll	ll	lm	lm	lm	ll	lm	lm	ll	lm	ll	ll	lm	ll	ll	lm
Marker441797	lmxll	lm	ll	lm	lm	ll	ll	lm	lm	lm	lm	lm	lm	ll	ll	lm	lm	lm	ll	ll	lm	lm	lm	ll	ll	lm	lm	lm	ll	ll	ll	ll	ll	ll	ll	lm	lm	lm	ll	lm	lm	ll	lm	ll	ll	lm	ll	ll	lm
Marker58201	lmxll	lm	ll	lm	lm	ll	ll	lm	lm	lm	lm	lm	lm	ll	ll	lm	lm	lm	ll	ll	lm	lm	lm	ll	ll	lm	lm	lm	ll	ll	ll	ll	ll	ll	ll	lm	lm	lm	ll	lm	lm	ll	lm	ll	ll	lm	ll	ll	lm
Marker192838	lmxll	ll	lm	ll	ll	lm	lm	ll	ll	ll	ll	ll	ll	lm	lm	ll	ll	ll	lm	lm	ll	ll	ll	lm	lm	ll	ll	ll	lm	lm	lm	lm	lm	lm	lm	ll	ll	ll	lm	ll	ll	lm	ll	lm	lm	ll	lm	lm	ll
Marker179416	lmxll	lm	ll	lm	lm	ll	ll	lm	lm	lm	lm	lm	lm	ll	ll	lm	lm	lm	ll	ll	lm	lm	lm	ll	ll	lm	lm	lm	ll	ll	ll	ll	ll	ll	ll	lm	lm	lm	ll	lm	lm	ll	lm	ll	ll	lm	ll	ll	lm
Marker121974	lmxll	ll	lm	ll	ll	lm	lm	ll	ll	ll	ll	ll	ll	lm	lm	ll	ll	ll	lm	lm	ll	ll	ll	lm	lm	ll	ll	ll	lm	lm	lm	lm	lm	lm	lm	ll	ll	ll	lm	ll	ll	lm	ll	lm	lm	ll	lm	lm	ll
Marker210535	lmxll	ll	lm	ll	ll	lm	lm	ll	ll	ll	ll	ll	ll	lm	lm	ll	ll	ll	lm	lm	ll	ll	ll	lm	lm	ll	ll	ll	lm	lm	lm	lm	lm	lm	lm	ll	ll	ll	lm	ll	ll	lm	ll	lm	lm	ll	lm	lm	ll
Marker334015	lmxll	ll	lm	ll	ll	lm	lm	ll	ll	ll	ll	ll	ll	lm	lm	ll	ll	ll	lm	lm	ll	ll	ll	lm	lm	ll	ll	ll	lm	lm	lm	lm	lm	lm	lm	ll	ll	ll	lm	ll	ll	lm	ll	lm	lm	ll	lm	lm	ll
Marker262032	lmxll	lm	ll	lm	lm	ll	ll	lm	lm	lm	lm	lm	lm	ll	ll	lm	lm	lm	ll	ll	lm	lm	lm	ll	ll	lm	lm	lm	ll	ll	ll	ll	ll	ll	ll	lm	lm	lm	ll	lm	lm	ll	lm	ll	ll	lm	ll	ll	lm
Marker27478	lmxll	ll	lm	ll	ll	lm	lm	ll	ll	ll	ll	lm	ll	lm	lm	ll	ll	ll	lm	lm	ll	ll	ll	lm	lm	ll	ll	ll	lm	lm	lm	lm	lm	lm	lm	ll	ll	ll	lm	ll	ll	lm	ll	lm	lm	ll	lm	lm	ll
Marker60945	hkxhk	hh	kk	hh	hh	hk	hk	hh	hh	hh	hh	hk	hh	kk	hk	hh	hh	hh	kk	kk	hh	hk	hh	hk	kk	hk	hh	hh	hk	hk	kk	kk	hk	hk	hk	hh	hh	hk	hk	hh	hh	kk	hk	hk	kk	hh	kk	kk	hk
Marker404329	nnxnp	np	nn	np	np	np	np	np	np	np	np	np	np	nn	np	np	np	np	nn	nn	np	nn	np	np	nn	nn	np	np	np	np	nn	nn	np	np	np	np	np	nn	np	np	np	nn	nn	np	nn	np	nn	nn	nn
Marker341041	lmxll	lm	ll	lm	lm	ll	ll	lm	lm	lm	lm	ll	lm	ll	ll	lm	lm	lm	ll	ll	lm	lm	lm	ll	ll	lm	lm	lm	ll	ll	ll	ll	ll	ll	ll	lm	lm	lm	ll	lm	lm	ll	lm	ll	ll	lm	ll	ll	lm
Marker149477	hkxhk	kk	hh	kk	kk	hk	hk	kk	kk	kk	kk	hk	kk	hh	hk	kk	kk	kk	hh	hh	kk	hk	kk	hk	hh	hk	kk	kk	hk	hk	hh	hh	hk	hk	hk	kk	kk	hk	hk	kk	kk	hh	hk	hk	hh	kk	hh	hh	hk
Marker37794	lmxll	ll	lm	ll	ll	lm	lm	ll	ll	ll	ll	lm	ll	lm	lm	ll	ll	ll	lm	lm	ll	ll	ll	lm	lm	ll	ll	ll	lm	lm	lm	lm	lm	lm	lm	ll	ll	ll	lm	ll	ll	lm	ll	lm	lm	ll	lm	lm	ll
Marker276906	lmxll	lm	ll	lm	lm	ll	ll	lm	lm	lm	lm	ll	lm	ll	ll	lm	lm	lm	ll	ll	lm	lm	lm	ll	ll	lm	lm	lm	ll	ll	ll	ll	ll	ll	ll	lm	lm	lm	ll	lm	lm	ll	lm	ll	ll	lm	ll	ll	lm
Marker124949	nnxnp	nn	np	nn	nn	nn	nn	nn	nn	nn	nn	nn	nn	np	nn	nn	nn	nn	np	np	nn	np	nn	nn	np	np	nn	nn	nn	nn	np	np	nn	nn	nn	nn	nn	np	nn	nn	nn	np	np	nn	np	nn	np	np	np
Marker438289	nnxnp	np	nn	np	np	np	np	np	np	np	np	np	np	nn	np	np	np	np	nn	nn	np	nn	np	np	nn	nn	np	np	np	np	nn	nn	np	np	np	np	np	nn	np	np	np	nn	nn	np	nn	np	nn	nn	nn
Marker494061	lmxll	lm	ll	lm	lm	ll	ll	lm	lm	lm	lm	ll	lm	ll	ll	lm	lm	lm	ll	ll	lm	lm	lm	ll	ll	lm	lm	lm	ll	ll	ll	ll	ll	ll	ll	lm	lm	lm	ll	lm	lm	ll	ll	ll	ll	lm	ll	ll	lm
Marker454069	lmxll	lm	ll	lm	lm	ll	ll	lm	lm	lm	lm	ll	lm	ll	ll	lm	lm	lm	ll	ll	lm	lm	lm	ll	ll	lm	lm	lm	ll	ll	ll	ll	ll	ll	ll	lm	lm	lm	ll	lm	lm	ll	ll	ll	ll	lm	ll	ll	lm
Marker315252	nnxnp	np	nn	np	np	np	np	np	np	np	np	np	np	nn	np	np	np	np	nn	nn	np	nn	np	np	nn	nn	np	np	np	np	nn	np	np	np	np	np	np	nn	np	np	np	nn	nn	np	nn	np	nn	nn	nn
Marker99719	nnxnp	nn	np	nn	nn	nn	nn	nn	nn	nn	nn	nn	nn	np	nn	nn	nn	nn	np	np	nn	np	nn	nn	np	np	nn	nn	nn	nn	np	nn	nn	nn	nn	nn	nn	np	nn	nn	nn	np	np	nn	np	nn	np	np	np
Marker251803	nnxnp	np	nn	np	np	np	np	np	np	np	np	np	np	nn	np	np	np	np	nn	nn	np	nn	np	np	nn	nn	np	np	np	np	nn	np	np	np	np	np	np	nn	np	np	np	nn	nn	np	nn	np	nn	nn	nn
Marker299064	lmxll	ll	lm	ll	ll	lm	ll	ll	ll	ll	ll	lm	ll	lm	lm	ll	ll	ll	lm	lm	ll	ll	ll	lm	lm	ll	ll	ll	lm	lm	lm	lm	ll	lm	lm	ll	ll	ll	lm	ll	ll	lm	lm	lm	lm	ll	lm	lm	ll
Marker385970	lmxll	lm	ll	lm	lm	ll	lm	lm	lm	lm	lm	ll	lm	ll	ll	lm	lm	lm	ll	ll	lm	lm	lm	ll	ll	lm	lm	lm	ll	ll	ll	ll	lm	ll	ll	lm	lm	lm	ll	lm	lm	ll	ll	ll	ll	lm	ll	ll	lm
Marker464385	lmxll	lm	ll	lm	lm	ll	lm	lm	lm	lm	lm	ll	lm	ll	ll	lm	lm	lm	ll	ll	lm	lm	lm	ll	ll	lm	lm	lm	ll	ll	ll	ll	lm	ll	ll	lm	lm	lm	ll	lm	lm	ll	ll	ll	ll	lm	ll	ll	lm
Marker407577	lmxll	ll	lm	ll	ll	lm	ll	ll	ll	ll	ll	lm	ll	lm	lm	ll	ll	ll	lm	lm	ll	ll	ll	lm	lm	ll	ll	ll	lm	lm	lm	lm	ll	lm	lm	ll	ll	ll	lm	ll	ll	lm	lm	lm	lm	ll	lm	lm	ll
Marker131635	lmxll	lm	ll	lm	lm	ll	lm	lm	lm	lm	lm	ll	lm	ll	ll	lm	lm	lm	ll	ll	lm	lm	lm	ll	ll	lm	lm	lm	ll	ll	ll	ll	lm	ll	ll	lm	lm	lm	ll	lm	lm	ll	ll	ll	ll	lm	ll	ll	lm
Marker124950	nnxnp	np	nn	nn	np	np	np	np	np	np	np	np	np	nn	np	np	np	np	nn	nn	np	nn	np	np	np	nn	np	np	np	np	nn	np	np	np	np	np	np	nn	np	np	np	nn	nn	np	nn	np	np	nn	np
Marker763820	nnxnp	np	nn	nn	np	np	np	np	np	np	np	np	np	nn	np	np	np	np	nn	nn	np	nn	np	np	np	nn	np	np	np	np	nn	np	np	np	np	np	np	nn	np	np	np	nn	nn	np	nn	np	np	nn	np
Marker422236	nnxnp	nn	np	np	nn	nn	nn	nn	nn	nn	nn	nn	nn	np	nn	nn	nn	nn	np	np	nn	np	nn	nn	nn	np	nn	nn	nn	nn	np	nn	nn	nn	nn	nn	nn	np	nn	nn	nn	np	np	nn	np	nn	nn	np	nn
Marker564732	lmxll	lm	ll	lm	lm	ll	lm	lm	lm	lm	lm	ll	lm	ll	ll	lm	lm	lm	ll	ll	lm	lm	lm	ll	ll	lm	lm	lm	ll	ll	ll	ll	lm	ll	ll	ll	lm	lm	ll	lm	lm	ll	ll	ll	ll	lm	ll	ll	lm
Marker266642	lmxll	lm	ll	lm	lm	ll	lm	ll	lm	lm	lm	ll	lm	ll	ll	lm	lm	lm	ll	ll	lm	lm	lm	ll	ll	lm	lm	lm	ll	ll	ll	ll	lm	ll	ll	ll	lm	lm	ll	lm	lm	ll	ll	ll	ll	lm	ll	ll	lm
Marker429315	lmxll	lm	ll	lm	lm	ll	lm	lm	lm	lm	lm	ll	lm	ll	ll	lm	lm	lm	ll	ll	lm	lm	lm	ll	ll	lm	lm	lm	ll	ll	ll	ll	lm	ll	ll	ll	lm	lm	ll	lm	lm	ll	ll	ll	ll	lm	ll	ll	lm
Marker357200	lmxll	ll	lm	ll	ll	lm	ll	ll	ll	ll	ll	lm	ll	lm	lm	ll	ll	ll	lm	lm	ll	ll	ll	lm	lm	ll	lm	ll	lm	lm	lm	lm	ll	lm	lm	lm	ll	ll	lm	ll	ll	lm	lm	ll	lm	ll	lm	lm	ll
Marker258407	lmxll	ll	lm	ll	ll	lm	ll	lm	ll	ll	ll	lm	ll	lm	lm	ll	ll	ll	lm	lm	ll	ll	ll	lm	lm	ll	lm	ll	lm	lm	lm	lm	ll	lm	lm	lm	ll	ll	lm	ll	ll	lm	ll	ll	lm	ll	lm	lm	ll
Marker126122	lmxll	ll	lm	ll	lm	lm	ll	lm	ll	ll	lm	lm	ll	lm	lm	ll	ll	ll	lm	lm	ll	ll	ll	lm	lm	ll	lm	ll	ll	lm	lm	ll	ll	ll	ll	lm	ll	lm	lm	ll	ll	lm	ll	ll	ll	ll	lm	lm	ll
Marker10725	lmxll	ll	lm	ll	lm	lm	ll	lm	ll	ll	lm	lm	ll	lm	lm	ll	ll	ll	lm	lm	ll	ll	ll	lm	lm	ll	lm	ll	ll	lm	lm	ll	ll	ll	ll	lm	ll	lm	lm	ll	ll	lm	ll	ll	ll	ll	lm	lm	ll
Marker294640	lmxll	ll	ll	ll	lm	lm	ll	lm	ll	ll	lm	lm	ll	lm	lm	ll	ll	ll	lm	lm	ll	ll	ll	lm	lm	ll	lm	ll	ll	lm	lm	ll	ll	ll	ll	lm	ll	lm	lm	ll	ll	lm	ll	ll	ll	ll	lm	ll	ll
Marker319913	lmxll	ll	ll	ll	lm	lm	ll	ll	ll	ll	lm	lm	ll	lm	lm	ll	ll	ll	lm	lm	ll	ll	ll	lm	lm	ll	lm	ll	ll	lm	lm	ll	ll	ll	lm	lm	ll	lm	lm	ll	ll	lm	ll	ll	ll	ll	lm	ll	ll
Marker415922	nnxnp	np	np	np	nn	nn	nn	np	nn	np	np	nn	np	np	nn	nn	nn	np	np	nn	nn	nn	nn	nn	np	nn	np	nn	nn	np	np	nn	np	np	np	np	nn	nn	np	np	nn	nn	np	nn	np	np	nn	nn	np
Marker238674	nnxnp	np	np	np	nn	nn	nn	np	nn	np	np	nn	np	np	nn	nn	nn	np	np	nn	nn	nn	nn	nn	np	nn	np	nn	nn	np	np	nn	np	np	np	np	nn	nn	np	np	nn	nn	np	nn	np	np	nn	nn	np
Marker394414	nnxnp	np	np	np	np	nn	nn	np	nn	np	np	nn	np	np	nn	nn	nn	np	np	nn	nn	np	nn	nn	np	nn	np	nn	nn	np	np	nn	np	np	np	np	nn	nn	np	np	nn	nn	np	nn	nn	np	nn	nn	np
Marker534767	nnxnp	np	np	np	np	nn	nn	np	nn	np	np	nn	np	np	nn	nn	nn	np	np	nn	nn	np	nn	nn	np	nn	np	nn	nn	np	np	nn	np	np	np	np	nn	nn	np	np	nn	nn	np	nn	nn	np	nn	nn	np
Marker362007	nnxnp	np	np	np	np	nn	nn	np	nn	np	np	nn	np	np	nn	nn	nn	np	np	nn	nn	np	nn	nn	np	nn	np	nn	np	np	np	nn	np	np	np	np	nn	nn	np	np	nn	nn	np	nn	nn	np	nn	nn	np
Marker67729	nnxnp	nn	nn	nn	nn	np	np	nn	np	nn	nn	np	nn	nn	np	np	np	nn	nn	np	np	nn	np	np	nn	np	nn	np	nn	nn	nn	np	nn	nn	nn	nn	np	np	nn	nn	np	np	nn	np	np	nn	np	np	nn
Marker550340	nnxnp	nn	nn	nn	nn	np	np	nn	np	nn	nn	np	nn	nn	np	nn	np	nn	nn	np	np	nn	np	np	nn	np	nn	np	nn	nn	nn	np	nn	nn	nn	nn	np	np	nn	nn	np	np	nn	np	np	nn	np	np	nn
Marker232688	hkxhk	hk	kk	kk	kk	hk	hh	kk	hh	hk	kk	hk	kk	hk	hh	kk	hk	kk	kk	hk	hk	hk	hh	hh	kk	hh	kk	hk	kk	kk	kk	hk	kk	hk	hk	kk	hh	hh	kk	kk	hk	hk	kk	hk	hh	hk	hh	hk	kk
Marker708476	nnxnp	nn	nn	nn	nn	np	np	nn	np	nn	nn	np	nn	nn	np	nn	np	nn	nn	np	np	nn	np	np	nn	np	nn	np	nn	nn	nn	np	nn	nn	nn	nn	np	np	nn	nn	np	np	nn	np	np	nn	np	np	nn
Marker208473	nnxnp	np	np	np	np	nn	nn	np	nn	np	np	nn	np	nn	nn	np	nn	np	np	nn	nn	np	nn	nn	np	nn	np	nn	np	np	np	nn	np	np	np	np	nn	nn	np	np	nn	nn	np	nn	nn	np	nn	nn	np
Marker132652	nnxnp	np	np	np	np	nn	nn	np	nn	np	np	nn	np	nn	nn	np	nn	np	np	nn	nn	np	nn	nn	np	nn	np	nn	np	np	np	nn	np	np	np	np	nn	nn	np	np	nn	nn	np	nn	nn	np	nn	nn	np
Marker42916	nnxnp	np	np	np	np	nn	nn	np	nn	np	np	nn	np	nn	nn	np	nn	np	np	nn	nn	np	nn	nn	np	nn	np	nn	np	np	np	nn	np	np	np	np	nn	np	np	np	nn	nn	np	nn	nn	np	nn	nn	np
Marker535429	nnxnp	np	np	np	np	nn	nn	np	nn	np	np	nn	np	nn	nn	np	nn	np	np	nn	nn	np	nn	nn	np	nn	np	nn	np	np	np	nn	np	np	np	np	nn	np	np	np	nn	nn	np	nn	nn	np	nn	nn	np
Marker506904	nnxnp	nn	nn	nn	nn	np	np	nn	np	nn	nn	np	nn	np	np	nn	np	nn	nn	np	np	nn	np	np	nn	np	nn	np	nn	nn	nn	np	nn	nn	nn	nn	np	nn	nn	nn	np	np	nn	np	np	nn	np	np	nn
Marker500194	lmxll	lm	ll	ll	ll	ll	lm	ll	lm	lm	ll	ll	ll	ll	lm	ll	ll	ll	ll	ll	ll	lm	lm	lm	ll	lm	ll	ll	ll	ll	ll	ll	ll	lm	lm	ll	lm	lm	ll	ll	ll	ll	ll	ll	lm	lm	lm	ll	ll
Marker55545	nnxnp	nn	nn	nn	nn	np	np	nn	np	nn	nn	np	nn	np	np	nn	np	nn	nn	np	np	nn	np	np	nn	np	nn	np	nn	nn	nn	np	nn	nn	nn	nn	np	nn	nn	nn	np	np	nn	np	np	nn	np	np	nn
Marker322521	nnxnp	np	np	np	np	nn	nn	np	nn	np	np	nn	np	nn	nn	np	nn	np	np	nn	nn	np	nn	nn	np	nn	np	nn	np	np	np	nn	np	np	np	np	nn	np	np	np	nn	nn	np	nn	nn	np	nn	nn	np
Marker190622	nnxnp	nn	nn	nn	nn	np	np	nn	np	nn	nn	np	nn	np	np	nn	np	nn	nn	np	np	nn	np	np	nn	np	nn	np	nn	nn	nn	np	nn	nn	nn	nn	np	nn	nn	nn	np	np	nn	np	np	nn	np	np	nn
Marker216134	efxeg	fg	eg	eg	eg	ee	ef	eg	ef	fg	eg	ee	eg	ee	ef	eg	ee	eg	eg	ee	ee	fg	ef	ef	eg	ef	eg	ee	eg	eg	eg	ee	eg	fg	fg	eg	ef	fg	eg	eg	ee	ee	eg	ee	ef	fg	ef	ee	eg
Marker294404	nnxnp	nn	nn	nn	nn	np	np	nn	np	nn	nn	np	nn	np	np	nn	np	nn	nn	np	np	nn	np	np	nn	np	nn	np	nn	nn	nn	np	nn	nn	nn	nn	np	nn	nn	nn	np	np	nn	np	np	nn	np	np	nn
Marker198482	nnxnp	np	np	np	np	nn	nn	np	nn	np	np	nn	np	nn	nn	np	nn	np	np	nn	nn	np	nn	nn	np	nn	np	nn	np	np	np	nn	np	np	np	np	nn	np	np	np	nn	nn	np	nn	nn	np	nn	nn	np
Marker259959	nnxnp	nn	nn	nn	nn	np	np	nn	np	nn	nn	np	nn	np	np	nn	np	nn	nn	np	np	nn	np	np	nn	np	nn	np	nn	nn	nn	np	nn	nn	nn	nn	np	nn	nn	nn	np	np	nn	np	np	nn	np	np	nn
Marker217202	nnxnp	nn	nn	nn	nn	np	np	nn	np	nn	nn	np	nn	np	np	nn	np	nn	nn	np	np	nn	np	np	nn	np	nn	np	nn	nn	nn	np	nn	nn	nn	nn	np	nn	nn	nn	np	np	nn	np	np	nn	np	np	nn
Marker227089	nnxnp	np	np	np	np	nn	nn	np	nn	np	np	nn	np	nn	nn	np	nn	np	np	nn	nn	np	nn	nn	np	nn	np	nn	np	np	np	nn	np	np	np	np	nn	np	np	np	nn	nn	np	nn	nn	np	nn	nn	np
Marker300863	nnxnp	np	np	np	np	nn	nn	np	nn	np	np	nn	np	nn	nn	np	nn	np	np	nn	nn	np	nn	nn	np	nn	np	nn	np	np	np	nn	np	np	np	np	nn	np	np	np	nn	nn	np	nn	nn	np	nn	nn	np
Marker198023	nnxnp	nn	nn	nn	nn	np	np	nn	np	nn	nn	np	nn	np	np	nn	np	nn	nn	np	np	nn	np	np	nn	np	nn	np	nn	np	nn	np	nn	nn	nn	nn	np	nn	nn	nn	np	np	nn	np	np	nn	np	np	nn
Marker224690	nnxnp	np	np	np	np	nn	nn	np	nn	np	np	nn	np	nn	nn	np	nn	np	np	nn	nn	np	nn	nn	np	nn	np	nn	np	nn	np	nn	np	np	np	np	nn	np	np	np	nn	nn	np	nn	nn	np	nn	nn	np
Marker204590	nnxnp	np	np	np	np	nn	nn	np	nn	np	np	nn	np	nn	nn	np	nn	np	np	nn	nn	np	nn	nn	np	nn	np	nn	np	nn	np	nn	np	np	np	np	nn	np	np	np	nn	nn	np	nn	nn	np	nn	nn	np
Marker276022	nnxnp	np	np	np	np	nn	nn	np	nn	np	np	nn	np	nn	nn	np	nn	np	np	nn	nn	np	nn	nn	np	nn	np	nn	np	nn	np	nn	np	np	np	np	nn	np	np	np	nn	nn	np	nn	nn	np	nn	np	np
Marker253082	nnxnp	nn	nn	nn	nn	np	np	nn	np	nn	nn	np	nn	np	np	nn	np	nn	nn	np	np	nn	np	np	nn	np	nn	np	nn	np	nn	np	nn	nn	nn	nn	np	nn	nn	nn	np	np	nn	np	np	nn	np	nn	nn
Marker77739	nnxnp	np	np	np	np	nn	nn	np	nn	np	np	nn	np	nn	nn	np	nn	np	np	nn	nn	np	nn	nn	np	nn	np	nn	np	nn	np	nn	np	np	np	np	nn	np	np	np	nn	nn	np	nn	nn	np	nn	np	np
Marker335966	nnxnp	np	np	np	np	nn	nn	np	nn	np	np	nn	np	nn	nn	np	nn	np	np	nn	nn	np	nn	nn	np	nn	np	nn	np	nn	np	nn	np	np	np	np	nn	np	np	np	nn	nn	np	nn	nn	np	nn	np	np
Marker67737	nnxnp	np	np	np	np	nn	nn	np	nn	np	np	nn	np	nn	nn	np	nn	np	np	nn	nn	np	nn	nn	np	nn	np	nn	np	nn	np	nn	np	np	np	np	nn	np	np	np	nn	nn	np	nn	nn	np	nn	np	np
Marker388037	lmxll	lm	ll	ll	ll	ll	lm	ll	lm	lm	ll	ll	ll	ll	lm	ll	ll	ll	ll	ll	ll	lm	lm	lm	ll	lm	ll	ll	ll	ll	ll	lm	ll	lm	lm	ll	lm	lm	ll	ll	ll	lm	ll	ll	lm	lm	lm	ll	ll
Marker311195	lmxll	lm	ll	ll	ll	ll	lm	ll	lm	lm	ll	ll	ll	ll	lm	ll	ll	ll	ll	ll	ll	lm	lm	lm	ll	lm	ll	ll	ll	ll	ll	lm	ll	lm	lm	ll	lm	lm	ll	ll	ll	lm	ll	ll	lm	lm	lm	ll	ll
Marker467682	nnxnp	np	np	np	np	nn	nn	np	nn	np	np	nn	np	nn	nn	np	nn	np	nn	nn	nn	np	nn	nn	np	nn	np	nn	np	nn	np	nn	np	np	np	np	nn	np	np	np	nn	nn	np	nn	nn	np	nn	np	np
Marker351142	lmxll	lm	lm	lm	ll	ll	ll	lm	lm	lm	ll	ll	ll	ll	lm	ll	ll	ll	ll	ll	ll	lm	lm	lm	ll	lm	ll	ll	ll	ll	ll	lm	ll	lm	lm	ll	lm	lm	ll	ll	ll	lm	ll	ll	lm	lm	lm	ll	ll
Marker199054	lmxll	lm	lm	lm	ll	ll	ll	lm	lm	lm	ll	ll	ll	ll	lm	ll	ll	ll	ll	ll	ll	lm	lm	lm	ll	lm	ll	ll	ll	ll	ll	lm	ll	lm	lm	ll	lm	lm	ll	ll	ll	lm	ll	ll	lm	lm	lm	ll	ll
Marker169185	nnxnp	np	np	np	np	nn	nn	np	nn	np	np	nn	np	nn	nn	np	nn	np	nn	nn	nn	np	nn	nn	np	nn	np	nn	np	nn	nn	nn	np	np	np	np	nn	np	np	np	nn	nn	np	nn	nn	np	nn	np	np
Marker263019	lmxll	lm	lm	lm	ll	ll	ll	lm	lm	lm	ll	ll	ll	ll	lm	ll	ll	ll	ll	ll	ll	lm	lm	lm	ll	lm	ll	ll	ll	ll	ll	lm	ll	lm	lm	ll	lm	lm	ll	ll	ll	lm	ll	ll	lm	lm	lm	ll	ll
Marker255792	nnxnp	np	np	np	np	nn	nn	np	nn	np	np	nn	np	nn	nn	np	nn	np	nn	nn	nn	np	nn	nn	np	nn	np	nn	np	nn	nn	nn	np	np	np	np	nn	np	np	np	nn	nn	np	nn	nn	np	nn	np	np
Marker160268	nnxnp	nn	nn	nn	nn	np	np	nn	np	nn	nn	np	nn	np	np	nn	np	nn	np	np	np	nn	np	np	nn	np	nn	np	nn	np	np	np	nn	nn	nn	nn	np	nn	nn	nn	np	np	nn	np	np	nn	np	nn	nn
Marker81892	nnxnp	np	np	np	np	nn	nn	np	nn	np	np	nn	np	nn	nn	np	nn	np	nn	nn	nn	np	nn	nn	np	nn	np	nn	np	nn	nn	nn	np	np	np	np	nn	np	np	np	nn	nn	np	nn	nn	np	nn	np	np
Marker305063	hkxhk	hh	hh	hh	hk	kk	kk	hh	hk	hh	hk	kk	hk	kk	hk	hk	kk	hk	kk	kk	kk	hh	hk	hk	hk	hk	hk	kk	hk	kk	kk	hk	hk	hh	hh	hk	hk	hh	hk	hk	kk	hk	hk	kk	hk	hh	hk	hk	hk
Marker200072	lmxll	lm	lm	lm	ll	ll	ll	lm	lm	lm	ll	ll	ll	ll	lm	ll	ll	ll	ll	ll	ll	lm	lm	lm	ll	lm	ll	ll	ll	ll	ll	lm	ll	lm	lm	ll	lm	lm	ll	ll	ll	lm	ll	ll	lm	lm	lm	ll	ll
Marker282537	nnxnp	np	np	np	np	nn	nn	np	nn	np	np	nn	np	nn	nn	np	nn	np	nn	nn	nn	np	nn	nn	np	nn	np	nn	np	nn	nn	nn	np	np	np	np	nn	np	np	np	nn	nn	np	nn	nn	np	nn	np	np
Marker662543	nnxnp	nn	nn	nn	nn	np	np	nn	np	nn	nn	np	nn	np	np	nn	np	nn	np	np	np	nn	np	np	nn	np	nn	np	nn	np	np	np	nn	nn	nn	nn	np	nn	nn	nn	np	np	nn	np	np	nn	np	nn	nn
Marker85387	lmxll	lm	lm	lm	ll	ll	ll	lm	ll	lm	ll	ll	ll	ll	lm	ll	ll	ll	ll	ll	ll	lm	lm	lm	ll	lm	lm	lm	ll	ll	ll	lm	ll	lm	lm	ll	lm	lm	ll	ll	ll	lm	ll	ll	lm	lm	lm	ll	ll
Marker261975	lmxll	ll	ll	ll	lm	lm	lm	ll	lm	ll	lm	lm	lm	lm	ll	lm	lm	lm	lm	lm	lm	ll	ll	ll	lm	ll	ll	ll	lm	lm	lm	ll	lm	ll	ll	lm	ll	ll	lm	lm	lm	ll	lm	lm	ll	ll	ll	lm	lm
Marker510600	lmxll	lm	lm	lm	ll	ll	ll	lm	ll	lm	ll	ll	ll	ll	lm	ll	ll	ll	ll	ll	ll	lm	lm	lm	ll	lm	lm	lm	ll	ll	ll	lm	ll	lm	lm	ll	lm	lm	ll	ll	ll	lm	ll	ll	lm	lm	lm	ll	ll
Marker25012	nnxnp	np	np	np	np	nn	nn	np	nn	np	np	nn	np	nn	nn	np	nn	np	nn	nn	nn	np	nn	nn	np	nn	np	nn	np	nn	nn	nn	nn	np	np	np	nn	np	nn	np	nn	nn	np	nn	nn	np	np	np	np
Marker484413	nnxnp	nn	nn	nn	nn	np	np	nn	np	nn	nn	np	nn	np	np	nn	np	nn	np	np	np	nn	np	np	nn	np	nn	np	nn	np	np	np	np	nn	nn	nn	np	nn	np	nn	np	np	nn	np	np	nn	nn	np	nn
Marker351408	nnxnp	nn	nn	nn	nn	np	np	nn	np	nn	nn	np	nn	np	np	nn	np	nn	np	np	np	nn	np	np	nn	np	nn	np	nn	np	np	np	np	nn	nn	nn	np	nn	np	nn	np	np	nn	np	np	nn	nn	np	nn
Marker64250	nnxnp	nn	nn	nn	nn	np	np	nn	np	nn	nn	np	nn	np	np	nn	np	nn	np	np	np	nn	np	np	nn	np	nn	np	nn	np	np	np	np	nn	nn	nn	np	nn	np	nn	np	np	nn	np	np	nn	nn	np	nn
Marker193620	nnxnp	nn	nn	nn	nn	np	np	nn	np	nn	nn	np	nn	np	np	nn	np	nn	np	np	np	nn	np	np	nn	np	nn	np	nn	np	np	np	np	nn	nn	nn	np	nn	np	nn	np	np	nn	np	np	nn	nn	np	nn
Marker218626	nnxnp	np	np	np	np	nn	nn	np	nn	np	np	nn	np	nn	nn	np	nn	np	nn	nn	nn	np	nn	nn	np	nn	np	nn	np	nn	nn	nn	nn	np	np	np	nn	np	nn	np	nn	nn	np	nn	nn	np	np	nn	np
Marker287530	lmxll	lm	lm	lm	lm	ll	ll	lm	ll	lm	ll	ll	ll	lm	lm	ll	ll	ll	ll	ll	ll	lm	lm	ll	lm	lm	lm	lm	ll	ll	ll	lm	ll	ll	lm	ll	lm	lm	ll	lm	ll	ll	ll	ll	ll	lm	lm	ll	lm
Marker149894	nnxnp	np	np	np	np	nn	nn	np	nn	np	np	nn	np	nn	nn	np	nn	np	nn	nn	nn	np	nn	nn	np	nn	np	nn	np	nn	nn	nn	nn	np	np	np	nn	np	nn	np	nn	nn	np	nn	nn	np	np	nn	np
Marker211543	nnxnp	nn	nn	nn	nn	np	np	nn	np	nn	nn	np	nn	np	np	nn	np	nn	np	np	np	nn	np	np	nn	np	nn	np	nn	np	np	np	np	nn	nn	nn	np	nn	np	nn	np	np	nn	np	np	nn	nn	np	nn
Marker169585	hkxhk	kk	kk	kk	kk	hh	hh	kk	hh	kk	hk	hh	hk	hk	hk	hk	hh	hk	hh	hh	hh	kk	hk	hh	kk	hk	kk	hk	hk	hh	hh	hk	hh	hk	kk	hk	hk	kk	hh	kk	hh	hh	hk	hh	hh	kk	kk	hh	kk
Marker436962	nnxnp	nn	nn	nn	nn	np	np	nn	np	nn	nn	np	nn	np	np	nn	np	nn	np	np	np	nn	np	np	nn	np	nn	np	nn	np	np	np	np	nn	nn	nn	np	nn	np	nn	np	np	nn	np	np	nn	nn	np	nn
Marker311822	nnxnp	np	np	np	np	nn	nn	np	nn	np	np	nn	np	nn	nn	np	nn	np	nn	nn	nn	np	nn	nn	np	nn	np	nn	np	nn	nn	nn	nn	np	np	np	nn	np	nn	np	nn	nn	np	nn	nn	np	np	nn	np
Marker186020	nnxnp	nn	nn	nn	nn	np	np	nn	np	nn	nn	np	nn	np	np	nn	np	nn	np	np	np	nn	np	np	nn	np	nn	np	nn	np	np	np	np	nn	nn	nn	np	nn	np	nn	np	np	nn	np	np	nn	nn	np	nn
Marker238490	nnxnp	nn	nn	nn	nn	np	np	nn	np	nn	nn	np	nn	np	np	nn	np	nn	np	np	np	nn	np	np	nn	np	nn	np	nn	np	np	np	np	nn	nn	nn	np	nn	np	nn	np	np	nn	np	np	nn	nn	np	nn
Marker221724	hkxhk	hh	hh	hh	hh	kk	kk	hh	kk	hh	hk	kk	hk	hk	hk	hk	kk	hk	kk	kk	kk	hh	hk	kk	hh	hk	hh	hk	hk	kk	kk	hk	kk	hk	hh	hk	hk	hh	kk	hh	kk	kk	hk	kk	kk	hh	hh	kk	hh
Marker56861	nnxnp	np	np	np	np	nn	nn	np	nn	np	np	nn	np	nn	nn	np	nn	np	nn	nn	nn	np	nn	nn	np	nn	np	nn	np	nn	nn	nn	nn	np	np	np	nn	np	nn	np	nn	nn	np	nn	nn	np	np	nn	np
Marker325420	nnxnp	np	np	np	np	nn	nn	np	nn	np	np	nn	np	nn	nn	np	nn	np	nn	nn	nn	np	nn	nn	np	nn	np	nn	np	nn	nn	nn	nn	np	np	np	nn	np	nn	np	nn	nn	np	nn	nn	np	np	nn	np
Marker408212	nnxnp	np	np	np	np	nn	nn	np	nn	np	np	nn	np	nn	nn	np	nn	np	nn	nn	nn	np	nn	nn	np	nn	np	nn	np	nn	nn	nn	nn	np	np	np	nn	np	nn	np	nn	nn	np	nn	nn	np	np	nn	np
Marker190799	nnxnp	nn	nn	nn	nn	np	np	nn	np	nn	nn	np	nn	np	np	nn	np	nn	np	np	np	nn	np	np	nn	np	nn	np	nn	np	np	np	np	nn	nn	nn	np	nn	np	nn	np	np	nn	np	np	nn	nn	np	nn
Marker710604	nnxnp	np	np	np	np	nn	nn	np	nn	np	np	nn	np	nn	nn	np	nn	np	nn	nn	nn	np	nn	nn	np	nn	np	nn	np	nn	nn	nn	nn	np	np	np	nn	np	nn	np	nn	nn	np	nn	nn	np	np	nn	np
Marker473741	lmxll	lm	lm	lm	lm	ll	ll	lm	ll	lm	ll	ll	ll	lm	lm	ll	ll	lm	ll	ll	ll	lm	ll	ll	lm	ll	lm	lm	ll	ll	ll	lm	ll	ll	lm	ll	lm	lm	ll	lm	ll	ll	ll	ll	ll	lm	lm	ll	lm
Marker154261	lmxll	lm	lm	lm	lm	ll	ll	lm	ll	lm	ll	ll	ll	lm	lm	ll	ll	lm	ll	ll	ll	lm	ll	ll	lm	ll	lm	lm	ll	ll	ll	lm	ll	ll	lm	ll	lm	lm	ll	lm	ll	ll	ll	ll	ll	lm	lm	ll	lm
Marker406115	nnxnp	np	np	np	np	nn	nn	np	nn	np	np	nn	np	nn	nn	np	nn	np	nn	nn	nn	np	nn	nn	np	nn	np	nn	np	nn	nn	nn	nn	np	np	np	nn	np	nn	np	nn	nn	np	nn	nn	np	np	nn	np
Marker163849	lmxll	ll	ll	ll	lm	lm	ll	ll	lm	ll	lm	lm	lm	ll	ll	lm	lm	ll	lm	lm	lm	ll	lm	lm	ll	lm	ll	ll	lm	lm	lm	ll	lm	lm	ll	lm	ll	ll	lm	ll	lm	lm	lm	lm	lm	lm	ll	lm	ll
Marker84218	nnxnp	np	np	np	np	nn	nn	np	nn	np	np	nn	np	nn	nn	np	nn	np	nn	nn	nn	np	nn	nn	np	nn	np	nn	np	nn	nn	nn	nn	np	np	np	nn	np	nn	np	nn	nn	np	nn	nn	np	np	nn	np
Marker115340	hkxhk	kk	kk	kk	hk	hh	hk	kk	hh	kk	hk	hh	hk	hk	hk	hk	hh	kk	hh	hh	hh	kk	hh	hh	kk	hh	kk	hk	hk	hh	hh	hk	hh	hk	kk	hk	hk	kk	hh	kk	hh	hh	hk	hh	hh	hk	kk	hh	kk
Marker331215	lmxll	lm	lm	lm	ll	ll	lm	lm	ll	lm	ll	ll	ll	lm	lm	ll	ll	lm	ll	ll	ll	lm	ll	ll	lm	ll	lm	lm	ll	ll	ll	lm	ll	ll	lm	ll	lm	lm	ll	lm	ll	ll	ll	ll	ll	ll	lm	ll	lm
Marker143080	lmxll	lm	lm	lm	ll	ll	lm	lm	ll	lm	ll	ll	ll	lm	lm	ll	ll	lm	ll	ll	ll	lm	ll	ll	lm	ll	lm	lm	ll	ll	ll	lm	ll	ll	lm	ll	lm	lm	ll	lm	ll	ll	ll	ll	ll	ll	lm	ll	lm
Marker235217	lmxll	ll	ll	ll	lm	lm	ll	ll	lm	ll	lm	lm	lm	ll	ll	lm	lm	ll	lm	lm	lm	ll	lm	lm	ll	lm	ll	ll	lm	lm	lm	ll	lm	lm	ll	lm	ll	ll	lm	ll	lm	lm	lm	lm	lm	lm	ll	lm	ll
Marker398311	lmxll	lm	lm	lm	ll	ll	lm	lm	ll	lm	ll	ll	ll	lm	lm	ll	ll	lm	ll	ll	ll	lm	ll	ll	lm	ll	lm	lm	ll	ll	ll	lm	ll	ll	lm	ll	lm	lm	ll	lm	ll	ll	ll	ll	ll	ll	lm	ll	lm
Marker338002	nnxnp	np	np	np	np	nn	nn	np	nn	np	np	nn	np	nn	nn	np	nn	np	nn	nn	nn	np	nn	nn	np	nn	np	nn	np	nn	nn	nn	nn	np	np	np	nn	np	nn	np	nn	nn	np	nn	nn	np	np	np	np
Marker268767	nnxnp	np	np	np	np	nn	nn	np	nn	np	np	nn	np	nn	nn	np	nn	np	nn	nn	nn	np	nn	nn	np	nn	np	nn	np	nn	nn	nn	nn	np	np	np	nn	np	nn	np	nn	nn	np	nn	nn	np	np	np	np
Marker307551	nnxnp	np	np	np	np	nn	nn	np	nn	np	np	nn	np	nn	nn	np	nn	np	nn	nn	nn	np	nn	nn	np	nn	np	nn	np	nn	nn	nn	np	np	np	np	nn	np	nn	np	nn	nn	np	nn	nn	np	np	np	np
Marker255674	nnxnp	np	np	np	np	nn	nn	np	nn	np	np	nn	np	nn	nn	np	nn	np	nn	nn	nn	np	nn	nn	np	nn	np	nn	np	nn	nn	nn	np	np	np	np	nn	np	nn	np	nn	nn	np	nn	nn	np	np	np	np
Marker238069	lmxll	lm	lm	lm	lm	ll	lm	lm	ll	lm	ll	ll	lm	lm	ll	ll	ll	lm	ll	ll	ll	lm	ll	ll	lm	ll	lm	lm	ll	ll	ll	lm	ll	lm	lm	ll	lm	lm	ll	lm	ll	ll	ll	ll	ll	ll	lm	ll	lm
Marker203378	lmxll	ll	ll	ll	ll	lm	ll	ll	lm	ll	lm	lm	ll	ll	lm	lm	lm	ll	lm	lm	lm	ll	lm	lm	ll	lm	ll	ll	lm	lm	lm	ll	lm	ll	ll	lm	ll	ll	lm	ll	lm	lm	lm	lm	lm	lm	ll	lm	ll
Marker178885	lmxll	ll	ll	ll	ll	lm	ll	ll	lm	ll	lm	lm	ll	ll	lm	lm	lm	ll	lm	lm	lm	ll	lm	lm	ll	lm	ll	ll	lm	lm	lm	ll	lm	ll	ll	lm	ll	ll	lm	ll	lm	lm	lm	lm	lm	lm	ll	lm	ll
Marker235412	nnxnp	np	np	np	np	nn	nn	np	nn	np	np	nn	np	nn	nn	np	nn	np	nn	nn	nn	np	nn	nn	np	nn	np	nn	np	nn	nn	nn	np	np	np	np	nn	np	nn	np	nn	nn	np	nn	nn	np	np	np	np
Marker104702	nnxnp	nn	nn	nn	nn	np	np	nn	np	nn	nn	np	nn	np	np	nn	np	nn	np	np	np	nn	np	np	nn	np	nn	np	nn	np	np	np	nn	nn	nn	nn	np	nn	np	nn	np	np	nn	np	np	nn	nn	nn	nn
Marker368789	nnxnp	np	np	np	np	nn	nn	np	nn	np	np	nn	np	nn	nn	np	nn	np	nn	nn	nn	np	nn	nn	np	nn	np	nn	np	nn	nn	nn	np	np	np	np	nn	np	nn	np	nn	nn	np	nn	nn	np	np	np	np
Marker126872	nnxnp	nn	nn	nn	nn	np	np	nn	np	nn	nn	np	nn	np	np	nn	np	nn	np	np	np	nn	np	np	nn	np	nn	np	nn	np	np	np	nn	nn	nn	nn	np	nn	np	nn	np	np	nn	np	np	nn	nn	nn	nn
Marker301548	nnxnp	nn	nn	nn	nn	np	np	nn	np	nn	nn	np	nn	np	np	nn	np	nn	np	np	np	nn	np	np	nn	np	nn	np	nn	np	np	np	nn	nn	nn	nn	np	nn	np	nn	np	np	nn	np	np	nn	nn	nn	nn
Marker214837	nnxnp	nn	nn	nn	nn	np	np	nn	np	nn	nn	np	nn	np	np	nn	np	nn	np	np	np	nn	np	np	nn	np	nn	np	nn	np	np	np	nn	nn	nn	nn	np	nn	np	nn	np	np	nn	np	np	nn	nn	nn	nn
Marker396513	nnxnp	np	np	np	np	nn	nn	np	nn	np	np	nn	np	nn	nn	np	nn	np	nn	nn	nn	np	nn	nn	np	nn	np	nn	np	nn	nn	nn	np	np	np	np	nn	np	nn	np	nn	nn	np	nn	nn	np	np	np	np
Marker312753	nnxnp	np	np	np	np	nn	nn	np	nn	np	np	nn	np	nn	nn	np	nn	np	nn	nn	nn	np	nn	nn	np	nn	np	nn	np	nn	nn	nn	np	np	np	np	nn	np	nn	np	nn	nn	np	nn	nn	np	np	np	np
Marker371394	nnxnp	nn	nn	nn	nn	np	np	nn	np	nn	nn	np	nn	np	np	nn	np	nn	np	np	np	nn	np	np	nn	np	nn	np	nn	np	np	np	nn	nn	nn	nn	np	nn	np	nn	np	np	nn	np	np	nn	nn	nn	nn
Marker454584	nnxnp	np	np	np	np	nn	nn	np	nn	np	np	nn	np	nn	nn	np	nn	np	nn	nn	nn	np	nn	nn	np	nn	np	nn	np	nn	nn	nn	np	np	nn	np	nn	np	nn	np	nn	nn	np	nn	nn	np	np	np	np
Marker185937	nnxnp	nn	nn	nn	nn	np	np	nn	np	nn	nn	np	nn	np	np	nn	np	nn	np	np	np	nn	np	np	nn	np	nn	np	nn	np	np	np	nn	nn	np	nn	np	nn	np	nn	np	np	nn	np	np	nn	nn	nn	nn
Marker335078	nnxnp	np	np	np	np	nn	nn	np	nn	np	np	nn	np	nn	nn	np	nn	np	nn	nn	nn	np	nn	nn	np	nn	np	nn	np	nn	nn	nn	np	np	nn	np	nn	np	nn	np	nn	nn	np	nn	nn	np	np	np	np
Marker472165	nnxnp	np	np	np	np	nn	nn	np	nn	np	np	nn	np	nn	nn	np	nn	np	nn	nn	nn	np	nn	nn	np	nn	np	nn	np	nn	nn	nn	np	np	nn	np	nn	np	nn	np	nn	nn	np	nn	nn	np	np	np	np
Marker156080	nnxnp	np	np	np	np	nn	nn	np	nn	np	np	nn	np	nn	nn	np	nn	np	nn	nn	nn	np	nn	nn	np	nn	np	nn	np	nn	nn	nn	np	np	nn	np	nn	np	nn	np	nn	nn	np	nn	nn	np	np	np	np
Marker552244	nnxnp	np	np	np	np	nn	nn	np	nn	np	np	nn	np	nn	nn	np	nn	np	nn	nn	nn	np	nn	nn	np	nn	np	nn	np	nn	nn	nn	np	np	nn	np	nn	np	nn	np	nn	nn	np	nn	nn	np	np	np	np
Marker673176	nnxnp	np	np	np	np	nn	nn	np	nn	np	np	nn	np	nn	nn	np	nn	np	nn	nn	nn	np	nn	nn	np	nn	np	nn	nn	nn	nn	nn	np	np	nn	np	nn	np	nn	np	nn	nn	np	nn	nn	np	np	np	np
Marker344572	nnxnp	nn	nn	nn	nn	np	np	nn	np	nn	nn	np	nn	np	np	nn	np	nn	np	np	np	nn	np	np	nn	np	nn	np	np	np	np	np	nn	nn	np	nn	np	nn	np	nn	np	np	nn	np	np	nn	nn	nn	nn
Marker223860	nnxnp	nn	nn	nn	nn	np	np	nn	np	nn	nn	np	nn	np	np	nn	np	nn	np	np	np	nn	np	np	nn	np	nn	np	np	np	np	np	nn	nn	np	nn	np	nn	np	nn	np	np	nn	np	np	nn	nn	nn	nn
Marker210545	nnxnp	nn	nn	nn	nn	np	np	nn	np	nn	nn	np	nn	np	np	nn	np	nn	np	np	np	nn	np	np	nn	np	nn	np	np	np	np	np	nn	nn	np	nn	np	nn	np	nn	np	np	nn	np	np	nn	nn	nn	nn
Marker429484	nnxnp	np	np	np	np	nn	nn	np	nn	np	np	nn	np	nn	nn	np	nn	np	nn	nn	nn	np	nn	nn	np	nn	np	nn	nn	nn	nn	nn	np	np	nn	np	nn	np	nn	np	nn	nn	np	nn	nn	np	np	np	np
Marker460511	nnxnp	nn	nn	nn	nn	np	np	nn	np	nn	nn	np	nn	np	np	nn	np	nn	np	np	np	nn	np	np	nn	np	nn	np	np	np	np	np	nn	nn	np	nn	np	nn	np	nn	np	np	nn	np	np	nn	nn	nn	nn
Marker323689	nnxnp	nn	nn	nn	nn	np	np	nn	np	nn	nn	np	nn	np	np	nn	np	nn	np	np	np	nn	np	np	nn	np	nn	np	np	np	np	np	nn	nn	np	nn	np	nn	np	nn	np	np	nn	np	np	nn	nn	nn	nn
Marker243173	lmxll	lm	lm	lm	ll	ll	ll	lm	ll	lm	lm	ll	ll	lm	ll	ll	ll	lm	lm	ll	lm	lm	ll	ll	ll	ll	lm	lm	ll	ll	ll	lm	ll	ll	lm	ll	lm	lm	ll	lm	ll	lm	ll	lm	ll	lm	lm	ll	lm
Marker233805	lmxll	ll	ll	ll	lm	lm	lm	ll	lm	ll	ll	lm	lm	ll	lm	lm	lm	ll	ll	lm	ll	ll	lm	lm	lm	lm	ll	ll	lm	lm	lm	ll	lm	lm	ll	lm	ll	ll	lm	ll	lm	ll	lm	ll	lm	ll	ll	lm	ll
Marker149096	lmxll	ll	ll	ll	lm	lm	lm	ll	lm	ll	ll	lm	lm	ll	lm	lm	lm	ll	ll	lm	ll	ll	lm	lm	lm	lm	ll	ll	lm	lm	lm	ll	lm	lm	ll	lm	ll	ll	lm	ll	lm	ll	lm	ll	lm	ll	ll	lm	ll
Marker213373	lmxll	ll	ll	ll	lm	lm	lm	ll	lm	ll	ll	lm	lm	ll	lm	lm	lm	ll	ll	lm	ll	ll	lm	lm	lm	lm	ll	ll	lm	lm	lm	ll	lm	lm	ll	lm	ll	ll	lm	ll	lm	ll	lm	ll	lm	ll	ll	lm	ll
Marker226798	nnxnp	nn	nn	nn	nn	np	np	nn	np	nn	nn	np	nn	np	np	nn	np	nn	nn	np	np	nn	np	np	nn	np	nn	np	np	np	np	np	nn	nn	np	nn	np	nn	np	nn	np	np	nn	np	np	nn	nn	nn	nn
Marker171233	nnxnp	np	np	np	np	nn	nn	np	nn	np	np	nn	np	nn	nn	np	nn	np	np	nn	nn	np	nn	nn	np	nn	np	nn	nn	nn	nn	nn	np	np	nn	np	nn	np	nn	np	nn	nn	np	nn	nn	np	np	np	np
Marker449445	nnxnp	np	np	np	np	nn	nn	np	nn	np	np	nn	np	nn	nn	np	nn	np	np	nn	nn	np	nn	nn	np	nn	np	nn	nn	nn	nn	nn	np	np	nn	np	nn	np	nn	np	nn	nn	np	nn	nn	np	np	np	np
Marker243035	nnxnp	nn	nn	nn	nn	np	np	nn	np	nn	nn	np	nn	np	np	nn	np	nn	nn	np	np	nn	np	np	nn	np	nn	np	np	np	np	np	nn	nn	np	nn	np	nn	np	nn	np	np	nn	np	np	nn	nn	nn	nn
Marker431723	lmxll	lm	lm	lm	ll	ll	ll	lm	ll	lm	lm	ll	ll	lm	ll	ll	ll	lm	lm	ll	lm	lm	ll	ll	ll	ll	lm	lm	ll	ll	ll	lm	lm	lm	lm	ll	lm	lm	ll	ll	ll	lm	ll	lm	ll	lm	lm	ll	lm
Marker251284	lmxll	lm	lm	lm	ll	ll	ll	lm	ll	lm	lm	ll	ll	lm	ll	ll	ll	lm	lm	ll	lm	lm	ll	ll	ll	ll	lm	lm	ll	ll	ll	lm	lm	lm	lm	ll	lm	lm	ll	ll	ll	lm	ll	lm	ll	lm	lm	ll	lm
Marker141742	lmxll	lm	lm	lm	ll	ll	ll	lm	ll	lm	lm	ll	ll	lm	ll	ll	ll	lm	lm	ll	lm	lm	ll	ll	ll	ll	lm	lm	ll	ll	ll	lm	lm	lm	lm	ll	lm	lm	ll	ll	ll	lm	ll	lm	ll	lm	lm	ll	lm
Marker413391	nnxnp	nn	nn	nn	nn	np	np	nn	np	nn	nn	np	nn	np	np	nn	np	nn	nn	np	np	nn	np	np	nn	np	nn	np	np	np	np	np	nn	nn	np	nn	np	nn	np	nn	np	np	nn	np	np	nn	nn	nn	nn
Marker227142	efxeg	fg	fg	fg	eg	ee	ee	fg	ee	fg	fg	ee	eg	ef	ee	eg	ee	fg	fg	ee	ef	fg	ee	ee	eg	ee	fg	ef	ee	ee	ee	ef	fg	fg	ef	eg	ef	fg	ee	eg	ee	ef	eg	ef	ee	fg	fg	eg	fg
Marker471421	lmxll	ll	ll	ll	lm	lm	lm	ll	lm	ll	ll	lm	lm	ll	lm	lm	lm	ll	ll	lm	ll	ll	lm	lm	lm	lm	ll	ll	lm	lm	lm	ll	ll	ll	ll	lm	ll	ll	lm	lm	lm	ll	lm	ll	lm	ll	ll	lm	ll
Marker282732	nnxnp	np	np	np	np	nn	nn	np	nn	np	np	nn	np	nn	nn	np	nn	np	np	nn	nn	np	nn	nn	np	nn	np	nn	nn	nn	nn	nn	np	np	nn	np	nn	np	nn	np	nn	nn	np	nn	nn	np	np	np	np
Marker361262	nnxnp	nn	nn	nn	nn	np	np	nn	np	nn	nn	np	nn	np	np	nn	np	nn	nn	np	np	nn	np	np	nn	np	nn	np	np	np	np	np	nn	nn	np	nn	np	nn	np	nn	np	np	nn	np	np	nn	nn	nn	nn
Marker164259	nnxnp	np	np	np	np	nn	nn	np	nn	np	np	nn	np	nn	nn	np	nn	np	np	nn	nn	np	nn	nn	np	nn	np	nn	nn	nn	nn	nn	np	np	nn	np	nn	np	nn	np	nn	nn	np	nn	nn	np	np	np	np
Marker194364	lmxll	lm	lm	lm	ll	ll	ll	lm	ll	lm	lm	ll	ll	lm	ll	ll	ll	lm	lm	ll	lm	lm	ll	ll	ll	ll	lm	lm	ll	ll	ll	lm	lm	lm	lm	ll	lm	lm	ll	ll	ll	lm	ll	lm	ll	lm	lm	ll	lm
Marker368921	nnxnp	nn	nn	nn	nn	np	nn	nn	np	nn	nn	np	nn	np	np	nn	np	nn	nn	np	np	nn	np	np	nn	np	nn	np	np	np	np	np	nn	nn	np	nn	np	nn	np	nn	np	np	nn	np	np	nn	nn	nn	nn
Marker143755	nnxnp	nn	nn	nn	nn	np	nn	nn	np	nn	nn	np	nn	np	np	nn	np	nn	nn	np	np	nn	np	np	nn	np	nn	np	np	np	np	np	np	nn	np	nn	np	nn	np	nn	np	np	nn	np	np	nn	nn	nn	nn
Marker318695	nnxnp	nn	nn	nn	nn	np	nn	nn	np	nn	nn	np	nn	np	np	nn	np	nn	nn	np	np	nn	np	np	nn	np	nn	np	np	np	np	np	np	nn	np	nn	np	nn	np	nn	np	np	nn	np	np	nn	nn	nn	nn
Marker153106	nnxnp	nn	nn	nn	nn	np	nn	nn	np	nn	nn	np	nn	np	np	nn	np	nn	nn	np	np	nn	np	np	nn	np	nn	np	np	np	np	np	np	nn	np	nn	np	nn	np	nn	np	np	nn	np	np	nn	nn	nn	nn
Marker382511	nnxnp	nn	nn	nn	nn	np	nn	nn	np	nn	nn	np	nn	np	np	nn	np	nn	nn	np	np	nn	np	np	nn	np	nn	np	np	np	np	np	np	nn	np	nn	np	nn	np	nn	np	np	nn	np	np	nn	nn	nn	nn
Marker204975	nnxnp	nn	nn	nn	nn	np	nn	nn	np	nn	nn	np	nn	np	np	nn	np	nn	nn	np	np	nn	np	np	nn	np	nn	np	np	np	np	np	np	nn	np	nn	np	nn	np	nn	np	np	nn	np	np	nn	nn	nn	nn
Marker309593	nnxnp	np	np	np	np	nn	np	np	nn	np	np	nn	np	nn	nn	np	nn	np	np	nn	nn	np	nn	nn	np	nn	np	nn	nn	nn	nn	nn	nn	np	nn	np	nn	np	nn	np	nn	nn	np	nn	nn	np	np	np	np
Marker545040	nnxnp	nn	nn	nn	nn	np	nn	nn	np	nn	nn	np	nn	np	np	nn	np	nn	nn	np	np	nn	np	np	nn	np	nn	np	np	np	np	np	np	nn	np	nn	np	nn	np	nn	np	np	nn	np	np	nn	nn	nn	nn
Marker413841	nnxnp	np	np	np	np	nn	np	np	nn	np	np	nn	np	nn	nn	np	nn	np	np	nn	nn	np	nn	nn	np	nn	np	nn	nn	nn	nn	nn	nn	np	nn	np	nn	np	nn	np	nn	nn	np	nn	nn	np	np	np	np
Marker199296	lmxll	ll	ll	ll	lm	ll	lm	ll	lm	ll	ll	lm	lm	ll	lm	lm	lm	ll	ll	lm	ll	ll	lm	lm	lm	lm	ll	ll	lm	lm	ll	ll	ll	lm	ll	ll	ll	ll	lm	lm	lm	ll	lm	ll	lm	ll	ll	lm	ll
Marker333206	lmxll	ll	ll	ll	lm	ll	lm	ll	lm	ll	ll	lm	lm	ll	lm	lm	lm	ll	ll	lm	ll	ll	lm	lm	lm	lm	ll	ll	lm	lm	ll	ll	ll	lm	ll	ll	ll	ll	lm	lm	lm	ll	lm	ll	lm	ll	ll	lm	ll
Marker149502	lmxll	lm	lm	lm	ll	lm	ll	lm	ll	lm	lm	ll	ll	lm	ll	ll	ll	lm	lm	ll	lm	lm	ll	ll	ll	ll	lm	lm	ll	ll	lm	lm	lm	ll	lm	lm	lm	lm	ll	ll	ll	lm	ll	lm	ll	lm	lm	ll	lm
Marker151944	lmxll	ll	ll	ll	lm	ll	lm	ll	lm	ll	ll	lm	lm	ll	lm	lm	lm	ll	ll	lm	ll	ll	lm	lm	lm	lm	ll	ll	lm	lm	ll	ll	ll	lm	ll	ll	ll	ll	lm	lm	lm	ll	lm	ll	lm	ll	ll	lm	ll
Marker471112	lmxll	lm	lm	lm	ll	lm	ll	lm	ll	lm	lm	ll	ll	lm	ll	ll	ll	lm	lm	ll	lm	lm	ll	ll	ll	ll	lm	lm	ll	ll	lm	lm	lm	ll	lm	lm	lm	lm	ll	ll	ll	lm	ll	lm	ll	lm	lm	ll	lm
Marker297756	lmxll	ll	ll	ll	lm	ll	lm	ll	lm	ll	ll	lm	lm	ll	lm	lm	lm	ll	ll	lm	ll	ll	lm	lm	lm	lm	ll	ll	lm	lm	ll	ll	ll	lm	ll	ll	ll	ll	lm	lm	lm	ll	lm	ll	lm	ll	ll	lm	ll
Marker164272	nnxnp	nn	nn	nn	nn	np	nn	nn	np	nn	nn	np	nn	np	np	nn	np	nn	nn	np	np	nn	np	np	nn	np	nn	np	np	np	np	np	np	nn	np	nn	np	nn	np	nn	np	np	nn	np	np	nn	nn	nn	nn
Marker297001	nnxnp	nn	nn	nn	nn	np	nn	nn	np	nn	nn	np	nn	np	np	nn	np	nn	nn	np	np	nn	np	np	nn	np	nn	np	np	np	np	np	np	nn	np	nn	np	nn	np	nn	np	np	nn	np	np	nn	nn	nn	nn
Marker269272	nnxnp	nn	nn	nn	nn	np	nn	nn	np	nn	nn	np	nn	np	np	nn	np	nn	nn	np	np	nn	np	np	nn	np	nn	np	np	np	np	np	nn	nn	np	nn	np	nn	np	nn	np	np	nn	np	np	nn	nn	nn	nn
Marker66868	nnxnp	nn	nn	nn	nn	np	nn	nn	np	nn	nn	np	nn	np	np	nn	np	nn	nn	np	np	nn	np	np	nn	np	nn	np	np	np	np	np	nn	nn	np	nn	np	nn	np	nn	np	np	nn	np	np	nn	nn	nn	nn
Marker537281	nnxnp	np	np	np	np	nn	np	np	nn	np	np	nn	np	nn	nn	np	nn	np	np	nn	nn	np	nn	nn	np	nn	np	nn	nn	nn	nn	nn	np	np	nn	np	nn	np	nn	np	nn	nn	np	nn	nn	np	np	np	np
Marker168576	nnxnp	nn	nn	nn	nn	np	nn	nn	np	nn	nn	np	nn	np	np	nn	np	nn	nn	np	np	nn	np	np	nn	np	nn	np	np	np	np	np	nn	nn	np	nn	np	nn	np	nn	np	np	nn	np	np	nn	nn	nn	nn
Marker330639	nnxnp	np	nn	np	np	nn	np	np	nn	np	np	nn	np	nn	nn	np	nn	np	np	nn	nn	np	nn	nn	np	nn	np	nn	nn	np	nn	nn	np	np	nn	np	nn	np	nn	np	nn	nn	np	nn	nn	np	np	np	np
Marker301127	nnxnp	nn	np	nn	nn	np	nn	nn	np	nn	nn	np	nn	np	np	nn	np	nn	nn	np	np	nn	np	np	nn	np	nn	np	np	nn	np	np	nn	nn	np	nn	np	nn	np	nn	np	np	nn	np	np	nn	nn	nn	nn
Marker304593	nnxnp	nn	np	nn	nn	np	nn	nn	np	nn	nn	np	nn	np	np	nn	np	nn	nn	np	np	nn	np	np	nn	np	nn	np	np	nn	np	np	nn	nn	np	nn	np	nn	np	nn	np	np	nn	np	np	nn	nn	nn	nn
Marker249625	nnxnp	nn	np	nn	nn	np	nn	nn	np	nn	nn	np	nn	np	np	nn	np	nn	nn	np	np	nn	np	np	nn	np	nn	np	np	nn	np	np	nn	nn	np	nn	np	nn	np	nn	np	np	nn	np	np	nn	nn	nn	nn
Marker94524	nnxnp	nn	np	nn	nn	np	nn	nn	np	nn	nn	np	nn	np	np	nn	np	nn	nn	np	np	nn	np	np	nn	np	nn	np	np	nn	np	np	nn	nn	np	nn	np	nn	np	nn	np	np	nn	np	np	nn	nn	nn	nn
Marker507648	nnxnp	nn	np	nn	nn	np	nn	nn	np	nn	nn	np	nn	np	np	nn	np	nn	nn	np	np	nn	np	np	nn	np	nn	np	np	nn	np	np	nn	nn	np	nn	np	nn	np	nn	np	np	nn	np	np	nn	nn	nn	nn
Marker358820	nnxnp	nn	np	nn	nn	np	nn	nn	np	nn	nn	np	nn	np	np	nn	np	nn	nn	np	np	nn	np	np	nn	np	nn	np	np	nn	np	np	nn	nn	np	nn	np	nn	np	nn	np	np	nn	np	np	nn	nn	nn	nn
Marker490158	nnxnp	nn	np	nn	nn	np	nn	nn	np	nn	nn	np	nn	np	np	nn	np	nn	nn	np	np	nn	np	np	nn	np	nn	np	np	nn	np	np	nn	nn	np	nn	np	nn	np	nn	np	np	nn	np	np	nn	nn	nn	nn
Marker296427	nnxnp	np	nn	np	np	nn	np	np	nn	np	np	nn	np	nn	nn	np	nn	np	np	nn	nn	np	nn	nn	np	nn	np	nn	nn	np	nn	nn	np	np	nn	np	nn	np	nn	np	nn	nn	np	nn	nn	np	np	np	np
Marker621241	nnxnp	np	nn	np	np	nn	np	np	nn	np	np	nn	np	nn	nn	np	nn	np	np	nn	nn	np	nn	nn	np	nn	np	nn	nn	np	nn	nn	np	np	nn	np	nn	np	nn	np	nn	nn	np	nn	nn	np	np	np	np
Marker206730	nnxnp	np	nn	np	np	nn	np	np	nn	np	np	nn	np	nn	nn	np	nn	np	np	nn	nn	np	nn	nn	np	nn	np	nn	nn	np	nn	nn	np	np	nn	np	nn	np	nn	np	nn	nn	np	nn	nn	np	np	np	np
Marker323168	nnxnp	np	nn	np	np	nn	np	np	nn	np	np	nn	np	nn	nn	np	nn	np	np	nn	nn	np	nn	nn	np	nn	np	nn	nn	np	nn	nn	np	np	nn	np	nn	np	nn	np	nn	nn	np	nn	nn	np	np	np	np
Marker131882	nnxnp	nn	np	nn	nn	np	nn	nn	np	nn	nn	np	nn	np	np	nn	np	nn	nn	np	np	nn	np	np	nn	np	nn	np	np	nn	np	np	nn	nn	np	nn	np	nn	np	nn	np	np	nn	np	np	nn	nn	nn	nn
Marker289004	nnxnp	np	nn	np	np	nn	np	np	nn	np	np	nn	np	nn	nn	np	nn	np	np	nn	nn	np	nn	nn	np	nn	np	nn	nn	np	nn	nn	np	np	nn	np	nn	np	nn	np	nn	nn	np	nn	nn	np	np	np	np
Marker541291	nnxnp	np	nn	np	np	nn	np	np	nn	np	np	nn	np	nn	nn	np	nn	np	np	nn	nn	np	nn	nn	np	nn	np	nn	nn	np	nn	nn	np	np	nn	np	nn	np	nn	np	nn	nn	np	nn	nn	np	np	np	np
Marker318319	nnxnp	nn	np	nn	nn	np	nn	nn	np	nn	nn	np	nn	np	np	nn	np	nn	nn	np	np	nn	np	np	nn	np	nn	np	np	nn	np	np	nn	nn	np	nn	np	nn	np	nn	np	np	nn	np	np	nn	nn	nn	nn
Marker30287	nnxnp	nn	np	nn	nn	np	nn	nn	np	nn	nn	np	nn	np	np	nn	np	nn	nn	np	np	nn	np	np	nn	np	nn	np	np	nn	np	np	nn	nn	np	nn	np	nn	np	nn	np	np	nn	np	np	nn	nn	nn	nn
Marker353993	nnxnp	np	nn	np	np	nn	np	np	nn	np	np	nn	np	nn	nn	np	nn	np	np	nn	nn	np	nn	nn	np	nn	np	nn	nn	np	nn	nn	np	np	nn	np	nn	np	nn	np	nn	nn	np	nn	nn	np	np	np	np
Marker344878	nnxnp	np	nn	np	np	nn	np	np	nn	np	np	nn	np	nn	nn	np	nn	np	np	nn	nn	np	nn	nn	np	nn	np	nn	nn	np	nn	nn	np	np	nn	np	nn	np	nn	np	nn	nn	np	nn	nn	np	np	np	np
Marker382722	nnxnp	np	nn	np	np	nn	np	np	nn	np	np	nn	np	nn	nn	np	nn	np	np	nn	nn	np	nn	nn	np	nn	np	nn	nn	np	nn	nn	np	np	nn	np	nn	np	nn	np	nn	nn	np	nn	nn	np	np	np	np
Marker270564	nnxnp	nn	np	nn	nn	np	nn	nn	np	nn	nn	np	nn	np	np	nn	np	nn	nn	np	np	nn	np	np	nn	np	nn	np	np	nn	np	np	nn	nn	np	nn	np	nn	np	nn	np	np	nn	np	np	nn	nn	nn	nn
Marker550546	nnxnp	np	nn	np	np	nn	np	np	nn	np	np	nn	np	nn	nn	np	nn	np	np	nn	nn	np	nn	nn	np	nn	np	nn	nn	np	nn	nn	np	np	nn	np	nn	np	nn	np	nn	nn	np	nn	nn	np	np	np	np
Marker384840	nnxnp	np	nn	np	np	nn	np	np	nn	np	np	nn	np	nn	nn	np	nn	np	np	nn	nn	np	nn	nn	np	nn	np	nn	nn	np	nn	nn	np	np	nn	np	nn	np	nn	np	nn	nn	np	nn	nn	np	np	np	np
Marker364017	lmxll	ll	ll	ll	lm	ll	lm	ll	lm	ll	ll	lm	lm	ll	lm	ll	lm	ll	ll	ll	ll	ll	lm	ll	lm	lm	ll	ll	lm	ll	ll	ll	ll	lm	ll	ll	ll	ll	lm	lm	lm	ll	lm	ll	ll	ll	ll	ll	lm
Marker14888	lmxll	ll	ll	ll	lm	ll	lm	ll	lm	ll	ll	lm	lm	ll	lm	ll	lm	ll	ll	ll	ll	ll	lm	ll	lm	lm	ll	ll	lm	ll	ll	ll	ll	lm	ll	ll	ll	ll	lm	lm	lm	ll	lm	ll	ll	ll	ll	ll	lm
Marker102748	lmxll	lm	lm	lm	ll	lm	ll	lm	ll	lm	lm	ll	ll	lm	ll	lm	ll	lm	lm	lm	lm	lm	ll	lm	ll	ll	lm	lm	ll	lm	lm	lm	lm	ll	lm	lm	lm	lm	ll	ll	ll	lm	ll	lm	lm	lm	lm	lm	ll
Marker516971	lmxll	ll	ll	ll	lm	ll	lm	ll	lm	ll	ll	lm	lm	ll	lm	ll	lm	ll	ll	ll	ll	ll	lm	ll	lm	lm	ll	ll	lm	ll	ll	ll	ll	lm	ll	ll	ll	ll	lm	lm	lm	ll	lm	ll	ll	ll	ll	ll	lm
Marker195862	lmxll	lm	lm	lm	ll	lm	ll	lm	ll	lm	lm	ll	ll	lm	ll	lm	ll	lm	lm	lm	lm	lm	ll	lm	ll	ll	lm	lm	ll	lm	lm	lm	lm	ll	lm	lm	lm	lm	ll	ll	ll	lm	ll	lm	lm	lm	lm	lm	ll
Marker237593	nnxnp	nn	np	nn	nn	np	nn	nn	np	nn	nn	np	nn	np	np	nn	np	nn	nn	np	np	nn	np	np	nn	np	nn	np	np	nn	np	np	np	nn	np	nn	np	nn	np	nn	np	np	nn	np	np	nn	nn	nn	nn
Marker338315	nnxnp	np	nn	np	np	nn	np	np	nn	np	np	nn	np	nn	nn	np	nn	np	np	nn	nn	np	nn	nn	np	nn	np	nn	nn	np	nn	nn	nn	np	nn	np	nn	np	nn	np	nn	nn	np	nn	nn	np	np	np	np
Marker205676	lmxll	ll	ll	ll	lm	ll	lm	ll	lm	ll	ll	lm	lm	ll	lm	ll	lm	ll	ll	ll	ll	ll	lm	ll	lm	lm	ll	ll	lm	ll	ll	ll	ll	lm	ll	ll	ll	ll	lm	lm	lm	ll	lm	ll	ll	ll	ll	ll	lm
Marker41374	hkxhk	hk	kk	hk	hh	kk	hh	hk	hk	hk	hk	hk	hh	kk	hk	hk	hk	hk	hk	kk	kk	hk	hk	kk	hh	hk	hk	kk	hk	hk	kk	kk	kk	hh	kk	hk	kk	hk	hk	hh	hk	kk	hh	kk	kk	hk	hk	hk	hh
Marker398793	hkxhk	hk	hh	hk	kk	hh	kk	hk	hk	hk	hk	hk	kk	hh	hk	hk	hk	hk	hk	hh	hh	hk	hk	hh	kk	hk	hk	hh	hk	hk	hh	hh	hh	kk	hh	hk	hh	hk	hk	kk	hk	hh	kk	hh	hh	hk	hk	hk	kk
Marker418689	nnxnp	nn	np	nn	nn	np	nn	nn	np	nn	nn	np	nn	np	np	nn	np	nn	nn	np	np	nn	np	np	nn	np	nn	np	np	nn	np	np	np	nn	np	nn	np	nn	np	nn	np	np	nn	np	np	nn	nn	nn	nn
Marker370007	nnxnp	np	nn	np	np	nn	np	np	nn	np	np	nn	np	nn	nn	np	nn	np	np	nn	nn	np	nn	nn	np	nn	np	nn	nn	np	nn	nn	nn	np	nn	np	nn	np	nn	np	nn	nn	np	nn	nn	np	np	np	np
Marker49365	nnxnp	nn	np	nn	nn	np	nn	nn	np	nn	nn	np	nn	np	np	nn	np	nn	nn	np	np	nn	np	np	nn	np	nn	np	np	nn	np	np	np	nn	np	nn	np	nn	np	nn	np	np	nn	np	np	nn	nn	nn	nn
Marker316565	nnxnp	np	nn	np	np	nn	np	np	nn	np	np	nn	np	nn	nn	np	nn	np	np	nn	nn	np	nn	nn	np	nn	np	nn	nn	np	nn	nn	nn	np	nn	np	nn	np	nn	np	nn	nn	np	nn	nn	np	np	np	np
Marker185285	nnxnp	np	nn	np	np	nn	np	np	nn	np	np	nn	np	nn	nn	np	nn	np	np	nn	nn	np	nn	nn	np	nn	np	nn	nn	np	nn	nn	nn	np	nn	np	nn	np	nn	np	nn	nn	np	nn	nn	np	np	np	np
Marker458327	nnxnp	nn	np	nn	nn	np	nn	nn	np	nn	nn	np	nn	np	np	nn	np	nn	nn	np	np	nn	np	np	nn	np	nn	np	np	nn	np	np	np	nn	np	nn	np	nn	np	nn	np	np	nn	np	np	nn	nn	nn	nn
Marker183955	lmxll	ll	ll	ll	lm	ll	lm	ll	lm	ll	ll	lm	lm	ll	lm	ll	lm	ll	ll	ll	ll	ll	lm	ll	lm	lm	ll	ll	lm	ll	ll	ll	ll	lm	ll	ll	ll	ll	lm	lm	lm	ll	lm	ll	ll	ll	ll	ll	lm
Marker235173	nnxnp	np	nn	np	np	nn	np	np	nn	np	np	nn	np	nn	nn	np	nn	np	np	nn	nn	np	nn	nn	np	nn	np	nn	nn	np	nn	nn	nn	np	nn	np	nn	nn	np	np	nn	nn	np	nn	nn	np	np	np	np
Marker203607	nnxnp	nn	np	nn	nn	np	np	nn	np	nn	nn	np	nn	np	np	nn	np	nn	nn	np	np	nn	np	np	nn	np	nn	np	np	nn	np	np	np	nn	np	nn	np	np	nn	nn	np	np	nn	np	np	nn	nn	nn	nn
Marker204539	hkxhk	hk	hh	hk	kk	hh	hk	hk	hk	hk	hk	hk	kk	hh	hk	hk	hk	hk	hk	hh	hh	hk	hk	hh	kk	hk	hk	hh	hk	hk	hh	hh	hh	kk	hh	hk	hh	hh	kk	kk	hk	hh	kk	hh	hh	hk	hk	hk	kk
Marker39760	nnxnp	np	nn	np	np	nn	nn	np	nn	np	np	nn	np	nn	nn	np	nn	np	np	nn	nn	np	nn	nn	np	nn	np	nn	nn	np	nn	nn	nn	np	nn	np	nn	nn	np	np	nn	nn	np	nn	nn	np	np	np	np
Marker199308	nnxnp	nn	np	nn	nn	np	np	nn	np	nn	nn	np	nn	np	np	nn	np	nn	nn	np	np	nn	np	np	nn	np	nn	np	np	nn	np	np	np	nn	np	nn	np	np	nn	nn	np	np	nn	np	np	nn	nn	nn	nn
Marker291305	nnxnp	np	nn	np	np	nn	nn	np	nn	np	np	nn	np	nn	nn	np	nn	np	np	nn	nn	np	nn	nn	np	nn	np	nn	nn	np	nn	nn	nn	np	nn	np	nn	nn	np	np	nn	nn	np	nn	nn	np	np	np	np
Marker262455	lmxll	ll	ll	ll	lm	ll	lm	ll	lm	ll	ll	lm	lm	ll	lm	ll	lm	ll	ll	ll	ll	ll	lm	ll	lm	lm	ll	ll	lm	ll	ll	ll	ll	lm	ll	ll	ll	ll	lm	lm	lm	ll	lm	ll	ll	ll	ll	ll	lm
Marker355488	hkxhk	hh	hk	hh	hk	hk	kk	hh	kk	hh	hh	kk	hk	hk	kk	hh	kk	hh	hh	hk	hk	hh	kk	hk	hk	kk	hh	hk	kk	hh	hk	hk	hk	hk	hk	hh	hk	hk	hk	hk	kk	hk	hk	hk	hk	hh	hh	hh	hk
Marker333674	nnxnp	nn	np	nn	nn	np	np	nn	np	nn	nn	np	nn	np	np	nn	np	nn	nn	np	np	nn	np	np	nn	np	nn	np	np	nn	np	np	np	nn	np	nn	np	np	nn	nn	np	np	nn	np	np	nn	nn	nn	nn
Marker616235	nnxnp	np	nn	np	np	nn	nn	np	nn	np	np	nn	np	nn	nn	np	nn	np	np	nn	nn	np	nn	nn	np	nn	np	nn	nn	np	nn	nn	nn	np	nn	np	nn	nn	np	np	nn	nn	np	nn	nn	np	np	np	np
Marker249296	nnxnp	np	nn	np	np	nn	nn	np	nn	np	np	nn	np	nn	nn	np	nn	np	np	nn	nn	np	nn	nn	np	nn	np	nn	nn	np	nn	nn	nn	np	nn	np	nn	nn	np	np	nn	nn	np	nn	nn	np	np	np	np
Marker286215	nnxnp	np	nn	np	np	nn	nn	np	nn	np	np	nn	np	nn	nn	np	nn	np	np	nn	nn	np	nn	nn	np	nn	np	nn	nn	np	nn	nn	nn	np	nn	np	nn	nn	np	np	nn	nn	np	nn	nn	np	np	np	np
Marker300115	nnxnp	nn	np	nn	nn	np	nn	nn	np	nn	nn	np	nn	np	np	nn	np	nn	nn	np	np	nn	np	np	nn	np	nn	np	np	nn	np	np	np	nn	np	nn	np	np	nn	nn	np	np	np	np	np	nn	nn	nn	nn
Marker254173	nnxnp	np	nn	np	np	nn	np	np	nn	np	np	nn	np	nn	nn	np	nn	np	np	nn	nn	np	nn	nn	np	nn	np	nn	nn	np	nn	nn	nn	np	nn	np	nn	nn	np	np	nn	nn	nn	nn	nn	np	np	np	np
Marker470731	nnxnp	nn	np	nn	nn	np	nn	nn	np	nn	nn	np	nn	np	np	nn	np	nn	nn	np	np	nn	np	np	nn	np	nn	np	np	nn	np	np	np	nn	np	nn	np	np	nn	nn	np	np	np	np	np	nn	nn	nn	nn
Marker472262	nnxnp	nn	np	nn	nn	np	nn	nn	np	nn	nn	np	nn	np	np	nn	np	nn	nn	np	np	nn	np	np	nn	np	nn	np	np	nn	np	np	np	nn	np	nn	np	np	nn	nn	np	np	np	np	np	nn	nn	nn	nn
Marker315101	nnxnp	nn	np	nn	nn	np	nn	nn	np	nn	nn	np	nn	np	np	nn	np	nn	nn	np	np	nn	np	np	nn	np	nn	np	np	nn	np	np	np	nn	np	nn	np	np	nn	nn	np	np	np	np	np	nn	nn	nn	nn
Marker549846	nnxnp	nn	np	nn	nn	np	nn	nn	np	nn	nn	np	nn	np	np	nn	np	nn	nn	np	np	nn	np	np	nn	np	nn	np	np	nn	np	np	np	nn	np	nn	np	np	nn	nn	np	np	np	np	np	nn	nn	nn	nn
Marker301742	nnxnp	np	nn	np	np	nn	np	np	nn	np	np	nn	np	nn	nn	np	nn	np	np	nn	nn	np	nn	nn	np	nn	np	nn	nn	np	nn	nn	nn	np	nn	np	nn	nn	np	np	nn	nn	nn	nn	nn	np	np	np	np
Marker119716	lmxll	ll	ll	ll	lm	ll	lm	ll	lm	ll	ll	lm	lm	ll	lm	ll	lm	ll	ll	ll	lm	ll	lm	ll	lm	lm	ll	ll	lm	ll	lm	ll	ll	lm	ll	ll	ll	ll	lm	lm	ll	ll	lm	ll	lm	ll	ll	ll	lm
Marker96837	lmxll	lm	lm	lm	ll	lm	ll	lm	ll	lm	lm	ll	ll	lm	ll	lm	ll	lm	lm	lm	ll	lm	ll	lm	ll	ll	lm	lm	ll	lm	ll	lm	lm	ll	lm	lm	lm	lm	ll	ll	lm	lm	ll	lm	ll	lm	lm	lm	ll
Marker458525	lmxll	lm	lm	lm	ll	lm	ll	lm	ll	lm	lm	ll	ll	lm	ll	lm	ll	lm	lm	lm	ll	lm	ll	lm	ll	ll	lm	lm	ll	lm	ll	lm	lm	ll	lm	lm	lm	lm	ll	ll	lm	lm	ll	lm	ll	lm	lm	lm	ll
Marker268144	lmxll	lm	lm	lm	ll	lm	ll	lm	ll	lm	lm	ll	ll	lm	ll	lm	ll	lm	lm	lm	ll	lm	ll	lm	ll	ll	lm	lm	ll	lm	ll	lm	lm	ll	lm	lm	lm	lm	ll	ll	lm	lm	ll	lm	ll	lm	lm	lm	ll
Marker218111	lmxll	lm	lm	lm	ll	lm	ll	lm	ll	lm	lm	ll	lm	lm	ll	lm	lm	lm	lm	lm	ll	lm	ll	lm	ll	ll	lm	lm	ll	lm	ll	lm	lm	ll	lm	lm	lm	lm	ll	ll	lm	lm	ll	lm	ll	lm	lm	lm	ll
Marker245399	lmxll	lm	lm	lm	ll	lm	ll	lm	ll	lm	lm	ll	lm	lm	ll	lm	lm	lm	lm	lm	ll	lm	ll	lm	ll	ll	lm	lm	ll	lm	ll	lm	lm	ll	lm	lm	lm	lm	ll	ll	lm	lm	ll	lm	ll	lm	lm	lm	ll
Marker182318	lmxll	lm	lm	lm	ll	lm	ll	lm	ll	lm	lm	ll	lm	lm	ll	lm	lm	lm	lm	lm	ll	lm	ll	lm	ll	ll	lm	lm	ll	lm	ll	lm	lm	ll	lm	lm	lm	lm	ll	ll	lm	lm	ll	lm	ll	lm	lm	lm	ll
Marker118780	lmxll	ll	ll	ll	lm	ll	lm	ll	lm	ll	ll	lm	ll	ll	lm	ll	ll	ll	ll	ll	lm	ll	lm	ll	lm	lm	ll	ll	lm	ll	lm	ll	ll	lm	ll	ll	ll	ll	lm	lm	ll	ll	lm	ll	lm	ll	ll	ll	lm
Marker448720	lmxll	lm	lm	lm	ll	lm	ll	lm	ll	lm	lm	ll	lm	lm	ll	lm	lm	lm	lm	lm	ll	lm	ll	lm	ll	ll	lm	lm	ll	lm	ll	lm	lm	ll	lm	lm	lm	lm	ll	ll	lm	lm	ll	lm	ll	lm	lm	lm	ll
Marker290446	lmxll	lm	lm	lm	ll	lm	ll	lm	ll	lm	lm	ll	lm	lm	ll	lm	lm	lm	lm	lm	ll	lm	ll	lm	ll	ll	lm	lm	ll	lm	ll	lm	lm	ll	lm	lm	lm	lm	ll	ll	lm	lm	ll	lm	ll	lm	lm	lm	ll
Marker363911	lmxll	lm	lm	lm	ll	lm	ll	lm	ll	lm	lm	ll	lm	lm	ll	lm	lm	lm	lm	lm	ll	lm	ll	lm	ll	ll	lm	lm	ll	lm	ll	lm	lm	ll	lm	lm	lm	lm	ll	ll	lm	lm	ll	lm	ll	lm	lm	lm	ll
Marker189227	nnxnp	nn	np	nn	nn	np	nn	nn	nn	nn	nn	np	nn	np	np	nn	np	nn	nn	np	np	nn	np	np	nn	np	nn	np	np	np	nn	np	np	nn	np	nn	np	nn	nn	nn	nn	np	np	np	np	nn	nn	nn	nn
Marker235096	nnxnp	nn	np	nn	nn	np	nn	nn	nn	nn	nn	np	nn	np	np	nn	np	nn	nn	np	np	nn	np	np	nn	np	nn	np	np	np	nn	np	np	nn	np	nn	np	nn	nn	nn	nn	np	np	np	np	nn	nn	nn	nn
Marker202258	nnxnp	nn	np	nn	nn	np	nn	nn	nn	nn	nn	np	nn	np	np	nn	np	nn	nn	np	np	nn	np	np	nn	np	nn	np	np	np	nn	np	np	nn	np	nn	np	nn	nn	nn	nn	np	np	np	np	nn	nn	nn	nn
Marker139011	nnxnp	np	nn	np	np	nn	np	np	np	np	np	nn	np	nn	nn	np	nn	np	np	nn	nn	np	nn	nn	np	nn	np	nn	nn	nn	np	nn	nn	np	nn	np	nn	np	np	np	np	nn	nn	nn	nn	np	np	np	np
Marker347192	nnxnp	nn	np	nn	nn	np	nn	nn	nn	nn	nn	np	nn	np	np	nn	np	nn	nn	np	np	nn	np	np	nn	np	nn	np	np	np	nn	np	np	nn	np	nn	np	nn	nn	nn	nn	np	np	np	np	nn	nn	nn	nn
Marker242553	nnxnp	np	nn	np	np	nn	np	np	np	np	np	nn	np	nn	nn	np	nn	np	np	nn	nn	np	nn	nn	np	nn	np	nn	nn	nn	np	nn	nn	np	nn	np	nn	np	np	np	np	nn	nn	nn	nn	np	np	np	np
Marker550971	nnxnp	np	nn	np	np	nn	np	np	np	np	np	nn	np	nn	nn	np	nn	np	np	nn	nn	np	nn	nn	np	nn	np	nn	nn	nn	np	nn	nn	np	nn	np	nn	np	np	np	np	nn	nn	nn	nn	np	np	np	np
Marker457810	nnxnp	np	nn	np	np	nn	np	np	np	np	np	nn	np	nn	nn	np	nn	np	np	nn	nn	np	nn	nn	np	nn	np	nn	nn	nn	np	nn	nn	np	nn	np	nn	np	np	np	np	nn	nn	nn	nn	np	np	np	np
Marker137575	lmxll	lm	lm	lm	ll	lm	ll	lm	ll	lm	lm	ll	lm	lm	ll	lm	lm	ll	lm	lm	ll	lm	lm	lm	ll	ll	lm	lm	ll	ll	ll	lm	ll	ll	lm	lm	ll	ll	ll	ll	lm	lm	ll	lm	ll	lm	lm	lm	ll
Marker217865	lmxll	lm	lm	lm	ll	lm	ll	lm	ll	lm	lm	ll	lm	lm	ll	lm	lm	ll	lm	lm	ll	lm	lm	lm	ll	ll	lm	lm	ll	ll	ll	lm	ll	ll	lm	lm	ll	ll	ll	ll	lm	lm	ll	lm	ll	lm	lm	lm	ll
Marker290145	lmxll	ll	ll	ll	lm	ll	lm	ll	lm	ll	ll	lm	ll	ll	lm	ll	ll	lm	ll	ll	lm	ll	ll	ll	lm	lm	ll	ll	lm	lm	lm	ll	lm	lm	ll	ll	lm	lm	lm	lm	ll	ll	lm	ll	lm	ll	ll	ll	lm
Marker121277	lmxll	lm	lm	lm	ll	lm	ll	lm	ll	lm	lm	ll	lm	lm	ll	lm	lm	ll	lm	lm	ll	lm	lm	lm	ll	ll	lm	lm	ll	ll	ll	lm	ll	ll	lm	lm	ll	ll	ll	ll	lm	lm	ll	lm	ll	lm	lm	lm	ll
Marker530342	lmxll	lm	lm	lm	ll	lm	ll	lm	ll	lm	lm	ll	lm	lm	ll	lm	lm	ll	lm	lm	ll	lm	lm	lm	ll	ll	lm	lm	ll	ll	ll	lm	ll	ll	lm	lm	ll	ll	ll	ll	lm	lm	ll	lm	ll	lm	lm	lm	ll
Marker229085	lmxll	lm	lm	lm	ll	lm	ll	lm	ll	lm	lm	ll	lm	lm	ll	lm	lm	ll	lm	lm	ll	lm	lm	lm	ll	ll	lm	lm	ll	ll	ll	lm	ll	ll	lm	lm	ll	ll	ll	ll	lm	lm	ll	lm	ll	lm	lm	lm	ll
Marker302458	lmxll	lm	lm	lm	ll	lm	ll	lm	ll	lm	lm	ll	lm	lm	ll	lm	lm	ll	lm	lm	ll	lm	lm	lm	ll	ll	lm	lm	ll	ll	ll	lm	ll	ll	lm	lm	ll	ll	ll	ll	lm	lm	ll	lm	ll	lm	lm	lm	ll
Marker340129	lmxll	ll	ll	ll	lm	ll	lm	ll	lm	ll	ll	lm	ll	ll	lm	ll	ll	lm	ll	ll	lm	ll	ll	ll	lm	lm	ll	ll	lm	lm	lm	ll	lm	lm	ll	ll	lm	lm	lm	lm	ll	ll	lm	ll	lm	ll	ll	ll	lm
Marker390912	nnxnp	nn	np	nn	nn	np	nn	nn	nn	nn	nn	np	nn	nn	np	nn	np	nn	np	np	np	nn	np	np	nn	np	nn	np	np	np	np	np	np	np	np	nn	np	nn	nn	nn	nn	np	np	np	nn	nn	nn	nn	nn
Marker365621	nnxnp	nn	np	nn	nn	np	nn	nn	nn	nn	nn	np	nn	nn	np	nn	np	nn	np	np	np	nn	np	np	nn	np	nn	np	np	np	np	np	np	np	np	nn	np	nn	nn	nn	nn	np	np	np	nn	nn	nn	nn	nn
Marker164437	nnxnp	np	nn	np	np	nn	np	np	np	np	np	nn	np	np	nn	np	nn	np	nn	nn	nn	np	nn	nn	np	nn	np	nn	nn	nn	nn	nn	nn	nn	nn	np	nn	np	np	np	np	nn	nn	nn	np	np	np	np	np
Marker405809	nnxnp	np	nn	np	np	nn	np	np	np	np	np	nn	np	np	nn	np	nn	np	nn	nn	nn	np	np	nn	np	nn	np	nn	nn	nn	nn	nn	nn	nn	nn	np	nn	np	np	np	np	nn	nn	nn	np	np	np	np	nn
Marker546146	nnxnp	np	nn	np	np	nn	np	np	np	np	np	nn	np	np	nn	np	nn	np	nn	nn	nn	np	np	nn	np	nn	np	nn	nn	nn	nn	nn	nn	nn	nn	np	nn	np	np	np	np	nn	nn	nn	np	np	np	np	nn
Marker711541	nnxnp	np	nn	np	np	nn	np	np	np	np	np	nn	np	np	nn	np	nn	np	nn	nn	nn	np	np	nn	np	nn	np	nn	nn	nn	nn	nn	nn	nn	nn	np	nn	np	np	np	np	nn	nn	nn	np	np	np	np	nn
Marker319467	nnxnp	np	nn	np	np	nn	np	np	np	np	np	nn	np	np	nn	np	nn	np	nn	nn	nn	np	np	nn	np	nn	np	nn	nn	nn	nn	nn	nn	nn	nn	np	nn	np	np	np	np	nn	nn	nn	np	np	np	np	nn
Marker322662	nnxnp	nn	np	nn	nn	np	nn	nn	nn	nn	nn	np	nn	nn	np	nn	np	nn	np	np	np	nn	nn	np	nn	np	nn	np	np	np	np	np	np	np	np	nn	np	nn	nn	nn	nn	np	np	np	nn	nn	nn	nn	np
Marker136695	nnxnp	np	nn	np	np	nn	np	np	np	np	np	nn	np	np	nn	np	nn	np	nn	nn	nn	np	np	nn	np	nn	np	nn	nn	nn	nn	nn	nn	nn	nn	np	nn	np	np	np	np	nn	nn	nn	np	np	np	np	nn
Marker227980	lmxll	ll	lm	ll	lm	lm	lm	ll	lm	ll	lm	lm	ll	ll	lm	ll	lm	ll	ll	lm	ll	ll	ll	ll	ll	lm	ll	lm	ll	lm	lm	lm	lm	lm	lm	ll	ll	ll	ll	ll	ll	lm	ll	ll	ll	lm	lm	lm	ll
Marker483614	lmxll	ll	lm	ll	lm	lm	lm	ll	lm	ll	lm	lm	ll	ll	lm	ll	lm	ll	ll	lm	ll	ll	ll	ll	ll	lm	ll	lm	ll	lm	lm	lm	lm	lm	lm	ll	ll	ll	ll	ll	ll	lm	ll	ll	ll	lm	lm	lm	ll
Marker133669	lmxll	lm	ll	lm	lm	ll	ll	lm	ll	lm	ll	ll	lm	lm	ll	lm	ll	lm	lm	ll	lm	lm	lm	lm	lm	ll	lm	ll	lm	ll	ll	ll	ll	ll	ll	lm	lm	lm	lm	lm	lm	ll	lm	lm	lm	ll	ll	ll	lm
Marker456574	lmxll	ll	lm	ll	ll	lm	lm	ll	lm	ll	lm	lm	ll	ll	lm	ll	lm	ll	ll	lm	ll	ll	ll	ll	ll	lm	ll	lm	ll	lm	lm	lm	lm	lm	lm	ll	ll	ll	ll	ll	ll	lm	ll	ll	ll	lm	lm	lm	ll
Marker55664	hkxhk	kk	hh	kk	kk	hh	hk	kk	hk	kk	hh	hk	--	kk	hk	kk	hk	hk	--	hk	kk	kk	kk	kk	kk	hh	hk	hh	kk	hh	hk	hh	hh	hh	hh	hk	kk	kk	kk	hk	kk	hk	kk	hk	kk	hh	hk	--	kk
Marker147850	lmxll	ll	lm	ll	ll	lm	lm	ll	lm	ll	lm	lm	ll	ll	lm	ll	lm	ll	ll	lm	ll	ll	ll	ll	ll	lm	ll	lm	ll	lm	lm	lm	lm	lm	lm	ll	ll	ll	ll	ll	ll	lm	ll	ll	ll	lm	lm	lm	ll
Marker111529	lmxll	lm	ll	lm	lm	ll	ll	lm	ll	lm	ll	ll	lm	lm	ll	lm	ll	lm	lm	ll	lm	lm	lm	lm	lm	ll	lm	ll	lm	ll	ll	ll	ll	ll	ll	lm	lm	lm	lm	lm	lm	ll	lm	lm	lm	ll	ll	ll	lm
Marker217448	nnxnp	nn	np	nn	nn	np	nn	nn	nn	nn	np	nn	np	nn	nn	nn	nn	np	nn	nn	nn	nn	nn	nn	nn	np	np	np	nn	np	nn	np	np	np	np	np	nn	nn	nn	np	nn	nn	nn	np	nn	np	nn	np	nn
Marker308552	nnxnp	np	nn	np	np	nn	np	np	np	np	nn	np	nn	np	np	np	np	nn	--	np	np	np	np	np	np	nn	nn	nn	np	nn	np	nn	nn	nn	nn	nn	np	np	np	nn	np	np	np	nn	np	nn	np	--	np
Marker437986	lmxll	ll	lm	ll	ll	lm	lm	ll	lm	ll	lm	lm	lm	lm	lm	ll	lm	ll	ll	lm	ll	ll	ll	ll	ll	lm	ll	lm	ll	lm	lm	lm	lm	lm	lm	ll	ll	ll	lm	ll	ll	lm	ll	ll	ll	lm	lm	lm	ll
Marker386817	lmxll	ll	lm	ll	ll	lm	lm	ll	lm	ll	lm	lm	lm	lm	lm	ll	lm	ll	ll	lm	ll	ll	ll	ll	lm	lm	ll	lm	ll	lm	lm	lm	lm	lm	lm	ll	ll	ll	lm	ll	ll	ll	ll	ll	ll	lm	lm	lm	ll
Marker265501	lmxll	ll	lm	ll	ll	lm	lm	ll	ll	ll	lm	lm	lm	lm	lm	ll	lm	ll	ll	lm	ll	ll	ll	ll	lm	lm	ll	lm	lm	lm	lm	lm	lm	lm	lm	ll	ll	ll	lm	ll	ll	ll	ll	ll	ll	lm	lm	lm	ll
Marker207506	lmxll	ll	lm	ll	ll	lm	lm	ll	ll	ll	lm	lm	lm	lm	lm	ll	lm	ll	ll	lm	ll	ll	ll	ll	lm	lm	ll	lm	lm	lm	lm	lm	lm	lm	lm	ll	ll	ll	lm	ll	ll	ll	ll	ll	ll	lm	lm	lm	ll
Marker294974	lmxll	lm	ll	lm	lm	ll	ll	lm	lm	lm	ll	ll	ll	ll	ll	lm	ll	lm	lm	ll	lm	lm	lm	lm	ll	ll	lm	ll	ll	ll	ll	ll	ll	ll	ll	lm	lm	lm	ll	lm	lm	lm	lm	ll	lm	lm	ll	ll	lm
Marker172270	lmxll	ll	lm	ll	ll	lm	lm	ll	ll	ll	lm	lm	lm	lm	lm	ll	lm	ll	ll	lm	ll	ll	ll	ll	lm	lm	ll	lm	lm	lm	lm	lm	lm	lm	lm	ll	ll	ll	lm	ll	ll	ll	ll	ll	ll	ll	lm	lm	ll
Marker246577	lmxll	lm	ll	lm	lm	ll	ll	lm	lm	lm	ll	ll	ll	ll	ll	lm	ll	lm	lm	ll	lm	lm	lm	ll	ll	ll	lm	ll	ll	ll	ll	ll	ll	ll	ll	lm	lm	lm	ll	lm	lm	lm	lm	ll	lm	lm	ll	ll	lm
Marker209268	lmxll	ll	lm	ll	ll	lm	lm	ll	ll	ll	lm	lm	lm	lm	lm	ll	lm	ll	ll	lm	ll	ll	ll	lm	lm	lm	ll	lm	lm	lm	lm	lm	lm	lm	lm	ll	ll	ll	lm	ll	ll	ll	ll	lm	ll	ll	lm	lm	ll
Marker109982	lmxll	ll	lm	ll	ll	lm	lm	ll	ll	ll	lm	lm	lm	lm	lm	ll	lm	ll	ll	lm	ll	ll	ll	lm	lm	lm	ll	lm	lm	lm	lm	lm	lm	lm	lm	ll	ll	ll	lm	ll	ll	ll	ll	lm	ll	ll	lm	lm	ll
Marker170605	lmxll	ll	lm	ll	ll	lm	lm	ll	ll	ll	lm	lm	lm	lm	ll	ll	lm	ll	ll	lm	ll	ll	ll	lm	lm	lm	ll	lm	lm	lm	lm	lm	lm	lm	lm	ll	ll	ll	lm	ll	ll	ll	ll	lm	ll	ll	lm	lm	ll
Marker538027	lmxll	lm	ll	lm	lm	ll	ll	lm	lm	lm	ll	ll	ll	ll	lm	lm	ll	lm	lm	ll	lm	lm	lm	ll	ll	ll	lm	ll	ll	ll	ll	ll	ll	ll	ll	lm	lm	lm	ll	lm	lm	lm	lm	ll	lm	lm	ll	ll	lm
Marker225774	nnxnp	nn	np	nn	np	nn	np	nn	np	nn	nn	np	nn	np	np	nn	np	nn	np	np	np	np	np	np	np	nn	nn	nn	np	np	nn	np	np	np	np	nn	np	np	np	nn	np	np	np	nn	np	nn	np	nn	np
Marker331062	lmxll	ll	lm	ll	ll	lm	lm	ll	ll	ll	lm	lm	lm	lm	ll	ll	lm	ll	ll	lm	ll	ll	ll	lm	lm	lm	ll	lm	lm	lm	lm	lm	lm	lm	lm	ll	ll	lm	lm	ll	ll	ll	ll	lm	ll	ll	lm	lm	ll
Marker93386	lmxll	lm	ll	lm	lm	ll	ll	lm	lm	lm	ll	ll	ll	ll	lm	lm	ll	lm	lm	ll	lm	lm	lm	ll	ll	ll	lm	ll	ll	ll	ll	ll	ll	ll	ll	lm	lm	ll	ll	lm	lm	lm	lm	ll	lm	lm	ll	ll	lm
Marker447558	lmxll	ll	lm	ll	ll	lm	ll	ll	ll	ll	lm	lm	lm	lm	ll	ll	lm	ll	ll	lm	ll	ll	ll	lm	lm	lm	ll	lm	lm	lm	lm	lm	lm	lm	lm	ll	ll	lm	lm	ll	ll	ll	ll	lm	ll	ll	lm	lm	ll
Marker313170	lmxll	ll	lm	ll	ll	lm	ll	ll	ll	ll	lm	lm	lm	lm	ll	ll	lm	ll	ll	lm	ll	ll	ll	lm	lm	lm	ll	lm	lm	lm	lm	lm	lm	lm	lm	ll	ll	lm	lm	ll	ll	ll	ll	lm	ll	ll	lm	lm	ll
Marker133619	lmxll	lm	ll	lm	lm	ll	lm	lm	lm	lm	ll	ll	ll	ll	lm	lm	ll	lm	lm	ll	lm	lm	lm	ll	ll	ll	lm	ll	ll	ll	ll	ll	ll	ll	ll	lm	lm	ll	ll	lm	lm	ll	lm	ll	lm	lm	ll	ll	lm
Marker134770	lmxll	ll	lm	ll	ll	lm	ll	ll	ll	ll	lm	lm	lm	lm	ll	ll	lm	ll	ll	lm	ll	ll	ll	lm	lm	lm	ll	lm	lm	lm	lm	lm	lm	lm	lm	ll	ll	lm	lm	ll	ll	lm	ll	lm	ll	ll	lm	lm	ll
Marker228811	lmxll	lm	ll	lm	lm	ll	lm	lm	lm	lm	ll	ll	ll	ll	lm	lm	ll	lm	lm	ll	lm	lm	lm	ll	ll	ll	lm	ll	ll	ll	ll	ll	ll	ll	ll	lm	lm	ll	ll	lm	lm	ll	lm	ll	lm	lm	ll	ll	lm
Marker300468	lmxll	lm	ll	lm	lm	ll	lm	lm	lm	lm	ll	ll	ll	ll	lm	lm	ll	lm	lm	ll	lm	lm	lm	ll	ll	ll	lm	ll	ll	ll	ll	ll	ll	ll	ll	lm	lm	ll	ll	lm	lm	ll	lm	ll	lm	lm	ll	ll	lm
Marker133261	lmxll	ll	lm	ll	ll	lm	ll	ll	ll	ll	lm	lm	lm	lm	ll	ll	lm	ll	ll	lm	ll	ll	ll	lm	lm	lm	ll	lm	lm	lm	lm	lm	lm	lm	lm	ll	ll	lm	lm	ll	ll	lm	ll	lm	ll	ll	lm	lm	ll
Marker339610	lmxll	lm	ll	lm	lm	ll	lm	lm	lm	lm	ll	ll	ll	ll	lm	lm	ll	lm	ll	ll	lm	lm	lm	ll	ll	ll	lm	ll	ll	ll	ll	ll	ll	ll	ll	lm	lm	ll	ll	lm	lm	ll	lm	ll	lm	lm	ll	ll	lm
Marker198070	lmxll	ll	lm	ll	ll	lm	ll	ll	ll	ll	lm	lm	lm	lm	ll	ll	lm	ll	lm	lm	ll	ll	ll	lm	lm	lm	ll	lm	lm	lm	lm	lm	lm	lm	lm	ll	ll	lm	lm	ll	ll	lm	ll	lm	ll	ll	lm	lm	ll
Marker243976	lmxll	lm	ll	lm	lm	ll	lm	lm	lm	lm	ll	ll	ll	ll	lm	lm	ll	lm	ll	ll	lm	lm	lm	ll	ll	ll	lm	ll	ll	ll	ll	ll	ll	ll	ll	lm	lm	ll	ll	lm	lm	ll	lm	ll	lm	lm	ll	ll	lm
Marker275586	lmxll	ll	lm	ll	ll	lm	ll	ll	ll	ll	lm	lm	lm	lm	ll	ll	lm	ll	lm	lm	ll	ll	ll	lm	lm	lm	ll	lm	lm	lm	lm	lm	lm	lm	lm	ll	ll	lm	lm	ll	ll	lm	ll	lm	ll	ll	lm	lm	ll
Marker61870	lmxll	lm	ll	lm	lm	ll	lm	lm	lm	lm	ll	ll	ll	ll	lm	lm	ll	lm	ll	ll	lm	lm	lm	ll	ll	ll	lm	ll	ll	ll	ll	ll	ll	ll	ll	lm	lm	ll	ll	lm	lm	ll	lm	ll	lm	lm	ll	ll	lm
Marker603707	lmxll	ll	lm	ll	ll	lm	ll	ll	ll	ll	lm	lm	lm	lm	ll	ll	lm	ll	lm	lm	ll	ll	ll	lm	lm	lm	ll	lm	lm	lm	lm	lm	lm	lm	lm	ll	ll	lm	lm	ll	ll	lm	ll	lm	ll	ll	lm	lm	ll
Marker284645	lmxll	ll	lm	ll	ll	lm	ll	ll	ll	ll	lm	lm	lm	lm	ll	ll	lm	ll	lm	lm	ll	ll	ll	lm	lm	lm	ll	lm	lm	lm	lm	lm	lm	lm	lm	ll	ll	lm	lm	ll	ll	lm	ll	lm	ll	ll	lm	lm	ll
Marker190424	lmxll	lm	ll	lm	lm	ll	lm	lm	lm	lm	ll	ll	ll	ll	lm	lm	ll	lm	ll	ll	lm	lm	lm	ll	ll	ll	lm	ll	ll	ll	ll	ll	ll	ll	ll	lm	lm	ll	ll	lm	lm	ll	lm	ll	lm	lm	ll	ll	lm
Marker115236	lmxll	lm	ll	lm	lm	ll	lm	lm	lm	lm	ll	ll	ll	ll	lm	lm	ll	lm	ll	ll	lm	lm	lm	ll	ll	ll	lm	ll	ll	ll	ll	ll	ll	ll	ll	lm	lm	ll	ll	lm	lm	ll	lm	ll	lm	lm	ll	ll	lm
Marker499388	lmxll	ll	lm	ll	ll	lm	ll	ll	ll	ll	lm	lm	lm	lm	ll	ll	lm	ll	lm	lm	ll	ll	ll	lm	lm	lm	ll	lm	lm	lm	lm	lm	lm	lm	lm	ll	ll	lm	lm	ll	ll	lm	ll	lm	ll	ll	lm	lm	ll
Marker87790	lmxll	ll	lm	ll	ll	lm	ll	ll	ll	ll	lm	lm	ll	lm	ll	ll	lm	ll	lm	lm	ll	ll	ll	lm	lm	lm	ll	lm	lm	lm	lm	lm	lm	lm	lm	ll	ll	lm	lm	ll	ll	lm	ll	lm	ll	ll	lm	lm	ll
Marker19065	lmxll	ll	lm	ll	ll	lm	ll	ll	ll	ll	lm	lm	ll	lm	ll	ll	lm	ll	lm	lm	ll	ll	ll	lm	lm	lm	ll	lm	lm	lm	lm	lm	lm	lm	lm	ll	ll	lm	lm	ll	ll	lm	ll	lm	ll	ll	lm	lm	ll
Marker386600	lmxll	lm	ll	lm	lm	ll	lm	lm	lm	lm	ll	ll	lm	ll	lm	lm	ll	lm	ll	ll	lm	lm	lm	ll	ll	ll	lm	ll	ll	ll	ll	ll	ll	ll	ll	lm	lm	ll	ll	lm	lm	ll	lm	ll	lm	lm	ll	ll	lm
Marker427895	lmxll	lm	ll	lm	lm	ll	lm	lm	lm	lm	ll	ll	lm	ll	lm	lm	ll	lm	ll	ll	lm	lm	lm	ll	ll	ll	lm	ll	ll	ll	ll	ll	ll	ll	ll	lm	lm	ll	ll	lm	lm	ll	lm	ll	lm	lm	ll	ll	lm
Marker504072	lmxll	lm	ll	lm	lm	ll	lm	lm	lm	lm	ll	ll	lm	ll	lm	lm	ll	lm	ll	ll	lm	lm	lm	ll	ll	ll	lm	ll	ll	ll	ll	ll	ll	ll	ll	lm	lm	ll	ll	lm	lm	ll	lm	ll	lm	lm	ll	ll	lm
Marker207631	lmxll	ll	lm	ll	ll	lm	ll	ll	ll	ll	lm	lm	ll	lm	ll	ll	lm	ll	lm	lm	ll	ll	ll	lm	lm	lm	ll	lm	lm	lm	lm	lm	lm	lm	lm	ll	ll	lm	lm	ll	ll	lm	ll	lm	ll	ll	lm	lm	ll
Marker465403	lmxll	ll	lm	ll	ll	lm	ll	ll	ll	ll	lm	lm	ll	lm	ll	ll	lm	ll	lm	lm	ll	ll	ll	lm	lm	lm	ll	lm	lm	lm	lm	lm	lm	lm	lm	ll	ll	lm	lm	ll	ll	lm	ll	lm	ll	ll	lm	lm	ll
Marker213485	lmxll	lm	ll	lm	lm	ll	lm	lm	lm	lm	ll	ll	lm	ll	lm	lm	ll	lm	ll	ll	lm	lm	lm	ll	ll	ll	lm	ll	ll	ll	ll	ll	ll	ll	ll	lm	lm	ll	ll	lm	lm	ll	lm	ll	lm	lm	ll	ll	lm
Marker79265	lmxll	ll	lm	ll	ll	lm	ll	ll	ll	ll	lm	lm	ll	lm	ll	ll	lm	ll	lm	lm	ll	ll	ll	lm	lm	lm	ll	lm	lm	lm	lm	lm	lm	lm	lm	ll	ll	lm	lm	ll	ll	lm	ll	lm	ll	ll	lm	lm	ll
Marker346472	lmxll	ll	lm	ll	ll	lm	ll	ll	ll	ll	lm	lm	ll	lm	ll	ll	lm	ll	lm	lm	ll	ll	ll	lm	lm	lm	ll	lm	lm	lm	lm	lm	lm	lm	lm	ll	ll	lm	lm	ll	ll	lm	ll	lm	ll	ll	lm	lm	ll
Marker199257	lmxll	lm	ll	lm	lm	ll	lm	lm	lm	lm	ll	ll	lm	ll	lm	lm	ll	lm	ll	ll	lm	lm	lm	ll	ll	ll	lm	ll	ll	ll	ll	ll	ll	ll	ll	lm	lm	ll	ll	lm	lm	ll	lm	ll	lm	lm	ll	ll	lm
Marker191259	lmxll	lm	ll	lm	lm	ll	lm	lm	lm	lm	ll	ll	lm	ll	lm	lm	ll	lm	ll	ll	lm	lm	lm	ll	ll	ll	lm	ll	ll	ll	ll	ll	ll	ll	ll	lm	lm	ll	ll	lm	lm	ll	lm	ll	lm	lm	ll	ll	lm
Marker177555	lmxll	lm	ll	lm	lm	ll	lm	lm	lm	lm	ll	ll	lm	ll	lm	lm	ll	lm	ll	ll	lm	lm	lm	ll	ll	ll	lm	ll	ll	ll	ll	ll	ll	ll	ll	lm	lm	ll	ll	lm	lm	ll	lm	ll	lm	lm	ll	ll	lm
Marker351617	lmxll	lm	ll	lm	lm	ll	lm	lm	lm	lm	ll	ll	lm	ll	lm	lm	ll	lm	ll	ll	lm	lm	lm	ll	ll	ll	lm	ll	ll	ll	ll	ll	ll	ll	ll	lm	lm	ll	ll	lm	lm	ll	lm	ll	lm	lm	ll	ll	lm
Marker170601	lmxll	ll	lm	ll	ll	lm	ll	ll	ll	ll	lm	lm	ll	lm	ll	ll	lm	ll	lm	lm	ll	ll	ll	lm	lm	lm	ll	lm	lm	lm	lm	lm	lm	lm	lm	ll	ll	lm	lm	ll	ll	lm	ll	lm	ll	ll	lm	ll	ll
Marker154065	lmxll	ll	lm	ll	ll	lm	ll	ll	ll	ll	lm	lm	ll	lm	ll	ll	lm	ll	lm	lm	ll	ll	ll	lm	lm	lm	ll	lm	lm	lm	lm	lm	lm	lm	lm	ll	ll	lm	lm	ll	ll	lm	ll	lm	ll	ll	lm	ll	ll
Marker359969	lmxll	lm	ll	lm	lm	ll	lm	lm	lm	lm	ll	ll	lm	ll	lm	lm	ll	lm	ll	ll	lm	lm	lm	ll	ll	ll	lm	ll	ll	ll	ll	ll	ll	ll	ll	lm	lm	ll	ll	lm	lm	ll	lm	ll	lm	lm	ll	lm	lm
Marker155019	lmxll	lm	ll	lm	lm	ll	lm	lm	lm	lm	ll	ll	lm	ll	lm	lm	ll	lm	ll	ll	lm	lm	lm	ll	ll	ll	lm	ll	ll	ll	ll	ll	ll	ll	ll	lm	lm	ll	ll	lm	lm	ll	lm	ll	lm	lm	ll	lm	lm
Marker336641	lmxll	ll	lm	ll	ll	lm	ll	ll	ll	ll	lm	lm	ll	lm	ll	ll	lm	ll	lm	lm	ll	ll	ll	lm	lm	lm	ll	lm	lm	lm	lm	lm	lm	lm	lm	ll	ll	lm	lm	ll	ll	lm	ll	lm	ll	ll	lm	ll	ll
Marker215534	lmxll	ll	lm	ll	ll	lm	ll	ll	ll	ll	lm	lm	ll	lm	ll	ll	lm	ll	lm	lm	ll	ll	ll	lm	lm	lm	ll	lm	lm	lm	lm	lm	lm	lm	lm	ll	ll	lm	lm	ll	ll	lm	ll	lm	ll	ll	lm	ll	ll
Marker150700	lmxll	ll	lm	ll	ll	lm	ll	ll	ll	ll	lm	lm	ll	lm	ll	ll	lm	ll	lm	lm	ll	ll	ll	lm	lm	lm	ll	lm	lm	lm	lm	lm	lm	lm	lm	ll	ll	lm	lm	ll	ll	lm	ll	lm	ll	ll	lm	ll	ll
Marker112192	lmxll	ll	lm	ll	ll	lm	ll	ll	ll	ll	lm	lm	ll	lm	ll	ll	lm	ll	lm	lm	ll	ll	ll	lm	lm	lm	ll	lm	lm	lm	lm	lm	lm	lm	lm	ll	ll	lm	lm	ll	ll	lm	ll	lm	ll	ll	lm	ll	ll
Marker93163	lmxll	ll	lm	ll	ll	lm	ll	ll	ll	ll	lm	lm	ll	lm	ll	ll	lm	ll	lm	lm	ll	ll	ll	lm	lm	lm	ll	lm	lm	lm	lm	lm	lm	lm	lm	ll	ll	lm	lm	ll	ll	lm	ll	lm	ll	ll	lm	ll	ll
Marker38202	lmxll	ll	lm	ll	ll	lm	ll	ll	ll	ll	lm	lm	ll	lm	ll	ll	lm	ll	lm	lm	ll	ll	ll	lm	lm	lm	ll	lm	lm	lm	lm	lm	lm	lm	lm	ll	ll	lm	lm	ll	ll	lm	ll	lm	ll	ll	lm	ll	ll
Marker391901	lmxll	ll	lm	ll	ll	lm	ll	ll	ll	ll	lm	lm	ll	lm	ll	ll	lm	ll	lm	lm	ll	ll	ll	lm	lm	lm	ll	lm	lm	lm	lm	lm	lm	lm	lm	ll	ll	lm	lm	ll	ll	lm	ll	lm	ll	ll	lm	ll	ll
Marker105659	lmxll	lm	ll	lm	lm	ll	lm	lm	lm	lm	ll	ll	lm	ll	lm	lm	ll	lm	ll	ll	lm	lm	lm	ll	ll	ll	lm	ll	ll	ll	ll	ll	ll	ll	ll	lm	lm	ll	ll	lm	lm	ll	lm	ll	lm	lm	ll	lm	lm
Marker327821	lmxll	ll	lm	ll	ll	lm	ll	ll	ll	ll	lm	lm	ll	lm	ll	ll	lm	ll	lm	lm	ll	ll	ll	lm	lm	lm	ll	lm	lm	lm	lm	lm	lm	lm	lm	ll	ll	lm	lm	ll	ll	lm	ll	lm	ll	ll	lm	ll	ll
Marker283098	lmxll	lm	ll	lm	lm	ll	lm	lm	lm	lm	ll	ll	lm	ll	lm	lm	ll	lm	ll	ll	lm	lm	lm	ll	ll	ll	lm	ll	ll	ll	ll	ll	ll	ll	ll	lm	lm	ll	ll	lm	lm	ll	lm	ll	lm	lm	ll	lm	lm
Marker358814	lmxll	ll	lm	ll	ll	lm	ll	ll	ll	ll	lm	lm	ll	lm	ll	ll	lm	ll	lm	lm	ll	ll	ll	lm	lm	lm	ll	lm	lm	lm	lm	lm	lm	lm	lm	ll	ll	lm	lm	ll	ll	lm	ll	lm	ll	ll	lm	ll	ll
Marker20372	lmxll	lm	ll	lm	lm	ll	lm	lm	lm	lm	ll	ll	lm	ll	lm	lm	ll	lm	ll	ll	lm	lm	lm	ll	ll	ll	lm	ll	ll	ll	ll	ll	ll	ll	ll	lm	lm	ll	ll	lm	lm	ll	lm	ll	lm	lm	ll	lm	lm
Marker359756	lmxll	lm	ll	lm	lm	ll	lm	lm	lm	lm	ll	ll	lm	ll	lm	lm	ll	lm	ll	ll	lm	lm	lm	ll	ll	ll	lm	ll	ll	ll	ll	ll	ll	ll	ll	lm	lm	ll	ll	lm	lm	ll	lm	ll	lm	lm	ll	lm	lm
Marker369095	lmxll	ll	lm	ll	ll	lm	ll	ll	ll	ll	lm	lm	ll	lm	ll	ll	lm	ll	lm	lm	ll	ll	ll	lm	lm	lm	ll	lm	lm	lm	lm	lm	lm	lm	lm	ll	ll	lm	lm	ll	ll	lm	ll	lm	ll	ll	lm	ll	ll
Marker55543	lmxll	ll	lm	ll	ll	lm	ll	ll	ll	ll	lm	lm	ll	lm	ll	ll	lm	ll	lm	lm	ll	ll	ll	lm	lm	lm	ll	lm	lm	lm	lm	lm	lm	lm	lm	ll	ll	lm	lm	ll	ll	lm	ll	lm	ll	ll	lm	ll	ll
Marker219028	hkxhk	hh	hk	hh	hh	hk	hk	hh	hk	hh	hk	kk	hk	hk	hk	hh	kk	hh	hk	kk	hk	hh	hk	kk	kk	kk	hh	hk	kk	kk	hk	kk	hk	kk	kk	hh	hk	kk	kk	hk	hk	kk	hk	hk	hk	hh	kk	hh	hk
Marker474627	lmxll	ll	lm	ll	ll	lm	ll	ll	ll	ll	lm	lm	ll	lm	ll	ll	lm	ll	lm	lm	ll	ll	ll	lm	lm	lm	ll	lm	lm	lm	lm	lm	lm	lm	lm	ll	ll	lm	lm	ll	ll	lm	ll	lm	ll	ll	lm	ll	ll
Marker203711	lmxll	ll	lm	ll	ll	lm	ll	ll	ll	ll	lm	lm	ll	lm	ll	ll	lm	ll	lm	lm	ll	ll	ll	lm	lm	lm	ll	lm	lm	lm	lm	lm	lm	lm	lm	ll	ll	lm	lm	ll	ll	lm	ll	lm	ll	ll	lm	ll	ll
Marker404533	lmxll	lm	ll	lm	lm	ll	lm	lm	lm	lm	ll	ll	lm	ll	lm	lm	ll	lm	ll	ll	lm	lm	lm	ll	ll	ll	lm	ll	ll	ll	ll	ll	ll	ll	ll	lm	lm	ll	ll	lm	lm	ll	lm	ll	lm	lm	ll	lm	lm
Marker218040	hkxhk	hh	hk	hh	hh	hk	hk	hh	hk	hh	hk	kk	hk	hk	hk	hh	kk	hh	hk	kk	hk	hh	hk	kk	kk	kk	hh	hk	kk	kk	hk	kk	hk	kk	kk	hh	hk	kk	kk	hk	hk	kk	hk	hk	hk	hh	kk	hh	hk
Marker295056	nnxnp	nn	nn	nn	nn	nn	np	nn	np	nn	nn	np	np	nn	np	nn	np	nn	nn	np	np	nn	np	np	np	np	nn	nn	np	np	nn	np	nn	np	np	nn	np	np	np	np	np	np	np	nn	np	nn	np	nn	np
Marker313521	nnxnp	np	np	np	np	np	nn	np	nn	np	np	nn	nn	np	nn	np	nn	np	np	nn	nn	np	nn	nn	nn	nn	np	np	nn	nn	np	nn	np	nn	nn	np	nn	nn	nn	nn	nn	nn	nn	np	nn	np	nn	np	nn
Marker202500	nnxnp	np	np	np	np	np	nn	np	nn	np	np	nn	nn	np	nn	np	nn	np	np	nn	nn	np	nn	nn	nn	nn	np	np	nn	nn	np	nn	np	nn	nn	np	nn	nn	nn	nn	nn	nn	nn	np	nn	np	nn	np	nn
Marker190975	nnxnp	nn	nn	nn	nn	nn	np	nn	np	nn	nn	np	np	nn	np	nn	np	nn	nn	np	np	nn	np	np	np	np	nn	nn	np	np	nn	np	nn	np	np	nn	np	np	np	np	np	np	np	nn	np	nn	np	nn	np
Marker202978	lmxll	ll	lm	ll	ll	lm	ll	ll	ll	ll	lm	lm	ll	lm	ll	ll	lm	ll	lm	lm	ll	ll	ll	lm	lm	lm	ll	lm	lm	lm	lm	lm	lm	lm	lm	ll	ll	lm	lm	ll	ll	lm	ll	lm	ll	ll	lm	ll	ll
Marker597018	lmxll	lm	ll	lm	lm	ll	lm	lm	lm	lm	ll	ll	lm	ll	lm	lm	ll	lm	ll	ll	lm	lm	lm	ll	ll	ll	lm	ll	ll	ll	ll	ll	ll	ll	ll	lm	lm	ll	ll	lm	lm	ll	lm	ll	lm	lm	ll	lm	lm
Marker120001	lmxll	lm	ll	lm	lm	ll	lm	lm	lm	lm	ll	ll	lm	ll	lm	lm	ll	lm	ll	ll	lm	lm	ll	ll	ll	ll	lm	ll	ll	ll	ll	ll	ll	ll	ll	lm	lm	ll	ll	lm	lm	ll	lm	ll	lm	lm	ll	lm	lm
Marker121180	lmxll	lm	ll	lm	lm	ll	lm	lm	lm	lm	ll	ll	lm	ll	lm	lm	ll	lm	ll	ll	lm	lm	ll	ll	ll	ll	lm	ll	ll	ll	ll	ll	ll	ll	ll	lm	lm	ll	ll	lm	lm	ll	lm	ll	lm	lm	ll	lm	lm
Marker358163	lmxll	lm	ll	lm	lm	ll	lm	lm	lm	lm	ll	ll	lm	ll	lm	lm	ll	lm	ll	ll	lm	lm	ll	ll	ll	ll	lm	ll	ll	ll	ll	ll	ll	ll	ll	lm	lm	ll	ll	lm	lm	ll	lm	ll	lm	lm	ll	lm	lm
Marker125554	lmxll	ll	lm	ll	ll	lm	ll	ll	ll	ll	lm	lm	ll	lm	ll	ll	lm	ll	lm	lm	ll	ll	lm	lm	lm	lm	ll	lm	lm	lm	lm	lm	lm	lm	lm	ll	ll	lm	lm	ll	ll	lm	ll	lm	ll	ll	lm	ll	ll
Marker150817	lmxll	ll	lm	ll	ll	lm	ll	ll	ll	ll	lm	lm	ll	lm	ll	ll	lm	ll	lm	lm	ll	ll	lm	lm	lm	lm	ll	lm	lm	lm	lm	lm	lm	lm	lm	ll	ll	lm	lm	ll	ll	ll	ll	lm	ll	ll	lm	ll	ll
Marker35736	lmxll	ll	lm	ll	ll	lm	ll	ll	ll	ll	lm	lm	ll	lm	ll	ll	lm	ll	lm	lm	ll	ll	lm	lm	lm	lm	ll	lm	lm	lm	lm	lm	lm	lm	lm	ll	ll	lm	lm	ll	ll	ll	ll	lm	ll	ll	lm	ll	ll
Marker100815	lmxll	lm	ll	lm	lm	ll	lm	lm	lm	lm	ll	ll	lm	ll	lm	lm	ll	lm	ll	ll	lm	lm	ll	ll	ll	ll	lm	ll	ll	ll	ll	ll	ll	ll	ll	lm	lm	ll	ll	lm	lm	lm	lm	ll	lm	lm	ll	lm	lm
Marker345837	lmxll	ll	lm	ll	ll	lm	ll	ll	ll	ll	lm	lm	ll	lm	ll	ll	lm	ll	lm	lm	ll	ll	lm	lm	lm	lm	ll	lm	lm	lm	lm	lm	lm	lm	lm	ll	ll	lm	lm	ll	ll	ll	ll	lm	ll	ll	lm	ll	ll
Marker107198	lmxll	lm	ll	lm	lm	ll	lm	lm	lm	lm	ll	ll	lm	ll	lm	lm	ll	lm	ll	ll	lm	lm	ll	ll	ll	ll	lm	ll	ll	ll	ll	ll	ll	ll	ll	lm	lm	ll	ll	lm	lm	lm	lm	ll	lm	lm	ll	lm	lm
Marker730000	lmxll	lm	ll	lm	lm	ll	lm	lm	lm	lm	ll	ll	lm	ll	lm	lm	ll	lm	ll	ll	lm	lm	ll	ll	ll	ll	lm	ll	ll	ll	ll	ll	ll	ll	ll	lm	lm	ll	ll	lm	lm	lm	lm	ll	lm	lm	ll	lm	lm
Marker152820	lmxll	ll	lm	ll	ll	lm	ll	ll	ll	ll	lm	lm	ll	lm	ll	ll	lm	ll	lm	lm	ll	ll	lm	lm	lm	lm	ll	lm	lm	lm	lm	lm	lm	lm	lm	ll	ll	lm	lm	ll	ll	ll	ll	lm	ll	ll	lm	ll	ll
Marker358907	lmxll	ll	lm	ll	ll	lm	ll	ll	ll	ll	lm	lm	ll	lm	ll	ll	lm	ll	lm	lm	ll	ll	lm	lm	lm	lm	ll	lm	lm	lm	lm	lm	lm	lm	lm	ll	ll	lm	lm	ll	ll	ll	ll	lm	ll	ll	lm	ll	ll
Marker617367	lmxll	lm	ll	lm	lm	ll	lm	lm	lm	lm	ll	ll	lm	ll	lm	lm	ll	lm	ll	ll	lm	lm	ll	ll	ll	ll	lm	ll	ll	ll	ll	ll	ll	ll	ll	lm	lm	ll	ll	lm	lm	lm	lm	ll	lm	lm	ll	lm	lm
Marker359617	lmxll	lm	ll	lm	lm	ll	lm	lm	lm	lm	ll	ll	lm	ll	lm	lm	ll	lm	ll	ll	lm	lm	ll	ll	ll	ll	lm	ll	ll	ll	ll	ll	ll	ll	ll	lm	lm	ll	ll	lm	lm	lm	lm	ll	lm	lm	ll	lm	lm
Marker214038	lmxll	ll	lm	ll	ll	lm	ll	ll	ll	ll	lm	ll	ll	lm	ll	ll	lm	ll	lm	lm	ll	ll	lm	lm	lm	lm	ll	lm	lm	lm	lm	lm	lm	lm	lm	ll	ll	lm	lm	ll	ll	ll	ll	lm	ll	ll	lm	ll	ll
Marker245676	lmxll	ll	lm	ll	ll	lm	ll	ll	ll	ll	lm	ll	ll	lm	ll	ll	lm	ll	lm	lm	ll	ll	lm	lm	lm	lm	ll	lm	lm	lm	lm	lm	lm	lm	lm	ll	ll	lm	lm	ll	ll	ll	ll	lm	ll	ll	lm	ll	ll
Marker369255	lmxll	lm	ll	lm	lm	ll	lm	lm	lm	lm	ll	lm	lm	ll	lm	lm	ll	lm	ll	ll	lm	lm	ll	ll	ll	ll	lm	ll	ll	ll	ll	ll	ll	ll	ll	lm	lm	ll	ll	lm	lm	lm	lm	ll	lm	lm	ll	lm	lm
Marker177870	lmxll	lm	ll	lm	lm	ll	lm	lm	lm	lm	ll	lm	lm	ll	lm	lm	ll	lm	ll	ll	lm	lm	ll	ll	ll	ll	lm	ll	ll	ll	ll	ll	ll	ll	ll	lm	lm	ll	ll	lm	lm	lm	lm	ll	lm	lm	ll	lm	lm
Marker167596	lmxll	ll	lm	ll	ll	lm	ll	ll	ll	ll	lm	ll	ll	lm	ll	ll	lm	ll	lm	lm	ll	ll	lm	lm	lm	lm	ll	lm	lm	lm	lm	lm	lm	lm	lm	ll	ll	lm	lm	ll	ll	ll	ll	lm	ll	ll	lm	ll	ll
Marker549807	nnxnp	nn	nn	nn	nn	nn	np	nn	np	nn	nn	np	np	nn	np	nn	np	nn	nn	np	np	nn	np	np	np	np	nn	nn	np	nn	nn	np	nn	np	np	nn	np	np	np	np	np	nn	np	nn	np	nn	np	nn	np
Marker168788	nnxnp	nn	nn	nn	nn	nn	np	nn	np	nn	nn	np	np	nn	np	nn	np	nn	nn	np	np	nn	np	np	np	np	nn	nn	np	nn	nn	np	nn	np	np	nn	np	np	np	np	np	nn	np	nn	np	nn	np	nn	np
Marker230230	nnxnp	nn	nn	nn	nn	nn	np	nn	np	nn	nn	np	np	nn	np	nn	np	nn	nn	np	np	nn	np	np	np	np	nn	nn	np	nn	nn	np	nn	np	np	nn	np	np	np	np	np	nn	np	nn	np	nn	np	nn	np
Marker465923	nnxnp	nn	nn	nn	nn	nn	np	nn	np	nn	nn	np	np	nn	np	nn	np	nn	nn	np	np	nn	np	np	np	np	nn	nn	np	nn	nn	np	nn	np	np	nn	np	np	np	np	np	nn	np	nn	np	nn	np	nn	np
Marker552077	nnxnp	np	np	np	np	np	nn	np	nn	np	np	nn	nn	np	nn	np	nn	np	np	nn	nn	np	nn	nn	nn	nn	np	np	nn	np	np	nn	np	nn	nn	np	nn	nn	nn	nn	nn	np	nn	np	nn	np	nn	np	nn
Marker275715	nnxnp	np	np	np	np	np	nn	np	nn	np	np	nn	nn	np	nn	np	nn	np	np	nn	nn	np	nn	nn	nn	nn	np	np	nn	np	np	nn	np	nn	nn	np	nn	nn	nn	nn	nn	np	nn	np	nn	np	nn	np	nn
Marker656242	lmxll	lm	ll	lm	lm	ll	lm	lm	lm	lm	ll	lm	lm	ll	lm	lm	ll	lm	ll	ll	lm	lm	ll	lm	ll	ll	lm	ll	ll	ll	ll	ll	ll	ll	ll	lm	lm	ll	ll	lm	lm	lm	ll	lm	lm	lm	ll	lm	ll
Marker210950	lmxll	ll	lm	ll	ll	lm	ll	ll	ll	ll	lm	ll	ll	lm	ll	ll	lm	ll	lm	lm	ll	ll	lm	ll	lm	lm	ll	lm	lm	lm	lm	lm	lm	lm	lm	ll	ll	lm	lm	ll	ll	ll	lm	ll	ll	ll	lm	ll	lm
Marker170165	lmxll	lm	ll	lm	lm	ll	lm	lm	lm	lm	ll	lm	lm	ll	lm	lm	ll	lm	ll	ll	lm	lm	ll	lm	ll	ll	lm	ll	ll	ll	ll	ll	ll	ll	ll	lm	lm	ll	ll	lm	lm	lm	ll	lm	lm	lm	ll	lm	ll
Marker181132	lmxll	ll	lm	ll	ll	lm	ll	ll	ll	ll	lm	ll	ll	lm	ll	ll	lm	ll	lm	lm	ll	ll	lm	ll	lm	lm	ll	lm	lm	lm	lm	lm	lm	lm	lm	ll	ll	lm	lm	ll	ll	ll	lm	ll	ll	ll	lm	ll	lm
Marker390945	lmxll	ll	lm	ll	ll	lm	ll	ll	ll	ll	lm	ll	ll	lm	ll	ll	lm	ll	lm	lm	ll	ll	lm	ll	lm	lm	ll	lm	lm	lm	lm	lm	lm	lm	lm	ll	ll	lm	lm	ll	ll	ll	lm	ll	ll	ll	lm	ll	lm
Marker193623	lmxll	ll	lm	ll	ll	lm	ll	ll	ll	ll	lm	ll	ll	lm	ll	ll	lm	ll	lm	lm	ll	ll	lm	ll	lm	lm	ll	lm	lm	lm	lm	lm	lm	lm	lm	ll	ll	lm	lm	ll	ll	ll	lm	ll	ll	ll	lm	ll	lm
Marker380671	lmxll	lm	ll	lm	lm	ll	lm	lm	lm	lm	ll	lm	lm	ll	lm	lm	ll	lm	ll	ll	lm	lm	ll	ll	ll	ll	lm	ll	ll	ll	ll	ll	ll	ll	ll	lm	lm	ll	ll	lm	lm	lm	lm	lm	lm	lm	ll	lm	ll
Marker199251	lmxll	lm	ll	lm	lm	ll	lm	lm	lm	lm	ll	lm	lm	ll	lm	lm	ll	lm	ll	ll	lm	lm	ll	ll	ll	ll	lm	ll	ll	ll	ll	ll	ll	ll	ll	lm	lm	ll	ll	lm	lm	lm	lm	lm	lm	lm	ll	lm	ll
Marker434698	lmxll	ll	lm	ll	ll	lm	ll	ll	ll	ll	lm	ll	ll	lm	ll	ll	lm	ll	lm	lm	ll	ll	lm	lm	lm	lm	ll	lm	lm	lm	lm	lm	lm	lm	lm	ll	ll	lm	lm	ll	ll	ll	ll	ll	ll	ll	lm	ll	lm
Marker233101	lmxll	ll	lm	ll	ll	lm	ll	ll	ll	ll	lm	ll	ll	lm	ll	ll	lm	ll	lm	lm	ll	ll	lm	lm	lm	lm	ll	lm	lm	lm	lm	lm	lm	lm	lm	ll	ll	lm	lm	ll	ll	ll	ll	ll	ll	ll	lm	ll	lm
Marker173248	lmxll	ll	lm	ll	ll	lm	ll	ll	ll	ll	lm	ll	ll	lm	ll	ll	lm	ll	lm	lm	ll	ll	lm	lm	lm	lm	ll	lm	lm	lm	lm	lm	lm	lm	lm	ll	ll	lm	lm	ll	ll	ll	ll	ll	ll	ll	lm	ll	lm
Marker324794	lmxll	lm	ll	lm	lm	ll	lm	lm	lm	lm	ll	lm	lm	ll	lm	lm	ll	lm	ll	ll	lm	lm	ll	ll	ll	ll	lm	ll	ll	ll	ll	ll	ll	ll	ll	lm	lm	ll	ll	lm	lm	lm	lm	lm	lm	lm	ll	lm	ll
Marker114024	lmxll	ll	lm	ll	ll	lm	ll	ll	ll	ll	lm	ll	ll	lm	ll	ll	lm	ll	lm	lm	ll	ll	lm	ll	lm	lm	ll	lm	lm	lm	lm	lm	lm	lm	lm	ll	ll	lm	lm	ll	ll	ll	ll	ll	ll	ll	lm	ll	lm
Marker683508	lmxll	lm	ll	lm	lm	ll	lm	lm	lm	lm	ll	lm	lm	ll	lm	lm	ll	lm	ll	ll	lm	lm	ll	lm	ll	ll	lm	ll	ll	ll	ll	ll	ll	ll	ll	lm	lm	ll	ll	lm	lm	lm	lm	lm	lm	lm	ll	lm	ll
Marker397352	lmxll	lm	ll	lm	lm	ll	lm	lm	lm	lm	ll	lm	lm	ll	lm	lm	ll	lm	ll	ll	lm	lm	ll	lm	ll	ll	lm	ll	ll	ll	ll	ll	ll	ll	ll	lm	lm	ll	ll	lm	lm	lm	lm	lm	lm	lm	ll	lm	ll
Marker224273	lmxll	ll	lm	ll	ll	lm	ll	ll	ll	ll	lm	ll	ll	lm	ll	ll	lm	ll	lm	lm	ll	ll	lm	ll	lm	lm	ll	lm	lm	lm	lm	lm	lm	lm	lm	ll	ll	lm	lm	ll	ll	ll	ll	ll	ll	ll	lm	ll	lm
Marker60944	lmxll	lm	ll	lm	lm	ll	lm	lm	lm	lm	ll	lm	lm	ll	lm	lm	ll	lm	ll	ll	lm	lm	ll	lm	ll	ll	lm	ll	ll	ll	ll	ll	ll	ll	ll	lm	lm	ll	ll	lm	lm	lm	ll	lm	lm	lm	ll	lm	ll
Marker478717	lmxll	ll	lm	ll	ll	lm	ll	ll	ll	ll	lm	ll	ll	lm	ll	ll	lm	ll	lm	lm	ll	ll	lm	ll	lm	lm	ll	lm	lm	lm	lm	lm	lm	lm	lm	ll	ll	lm	lm	ll	ll	ll	lm	ll	ll	ll	lm	ll	lm
Marker169536	lmxll	ll	lm	ll	ll	lm	ll	ll	ll	ll	lm	ll	ll	lm	ll	ll	lm	ll	lm	lm	ll	ll	lm	ll	lm	lm	ll	lm	lm	lm	lm	lm	lm	lm	lm	ll	ll	lm	lm	ll	ll	ll	lm	ll	ll	ll	lm	ll	lm
Marker233096	lmxll	lm	ll	lm	lm	ll	lm	lm	lm	lm	ll	lm	lm	ll	lm	lm	ll	lm	ll	ll	lm	lm	ll	lm	ll	ll	lm	ll	ll	ll	ll	ll	ll	ll	ll	lm	lm	ll	ll	lm	lm	lm	ll	lm	lm	lm	ll	lm	ll
Marker347680	lmxll	lm	ll	lm	lm	ll	lm	lm	lm	lm	ll	lm	lm	ll	lm	lm	ll	lm	ll	ll	lm	lm	ll	lm	ll	ll	lm	ll	ll	ll	ll	ll	ll	ll	ll	lm	lm	ll	ll	lm	lm	lm	ll	lm	lm	lm	ll	lm	ll
Marker474818	lmxll	ll	lm	ll	ll	lm	ll	ll	ll	ll	lm	ll	ll	lm	ll	ll	lm	ll	lm	lm	ll	ll	lm	ll	lm	lm	ll	lm	lm	lm	lm	lm	lm	lm	lm	ll	ll	lm	lm	ll	ll	ll	lm	ll	ll	ll	lm	ll	lm
Marker753660	lmxll	ll	lm	ll	ll	lm	ll	ll	ll	ll	lm	ll	ll	lm	ll	ll	lm	ll	lm	lm	ll	ll	lm	ll	lm	lm	ll	lm	lm	lm	lm	lm	lm	lm	lm	ll	ll	lm	lm	ll	ll	ll	lm	ll	ll	ll	lm	ll	lm
Marker58354	lmxll	ll	lm	ll	ll	lm	ll	ll	ll	ll	lm	ll	ll	lm	ll	ll	lm	ll	lm	lm	ll	ll	lm	ll	lm	lm	ll	lm	lm	lm	lm	lm	lm	lm	lm	ll	ll	lm	lm	ll	ll	ll	lm	ll	ll	ll	lm	ll	lm
Marker151533	lmxll	lm	ll	lm	lm	ll	lm	lm	lm	lm	ll	lm	lm	ll	lm	lm	ll	lm	ll	ll	lm	lm	ll	lm	ll	ll	lm	ll	ll	ll	ll	ll	ll	ll	ll	lm	lm	ll	ll	lm	lm	lm	ll	lm	lm	lm	ll	lm	ll
Marker29365	lmxll	lm	ll	lm	lm	ll	lm	lm	lm	lm	ll	lm	lm	ll	lm	lm	ll	lm	ll	ll	lm	lm	ll	lm	ll	ll	lm	ll	ll	ll	ll	ll	ll	ll	ll	lm	ll	ll	ll	lm	lm	lm	ll	lm	lm	lm	ll	lm	ll
Marker167205	lmxll	lm	ll	lm	lm	ll	lm	lm	lm	lm	ll	lm	lm	ll	lm	lm	ll	lm	ll	ll	lm	lm	ll	lm	ll	ll	lm	ll	ll	ll	ll	ll	ll	ll	ll	lm	ll	ll	ll	lm	lm	lm	ll	lm	lm	lm	ll	lm	ll
Marker672558	lmxll	ll	lm	ll	ll	lm	ll	ll	ll	ll	lm	ll	ll	lm	ll	ll	lm	ll	lm	lm	ll	ll	lm	ll	lm	lm	ll	lm	lm	lm	lm	lm	lm	lm	lm	ll	lm	lm	lm	ll	ll	ll	lm	ll	ll	ll	lm	ll	lm
Marker655553	lmxll	ll	lm	ll	ll	lm	ll	ll	ll	ll	lm	ll	ll	lm	ll	ll	lm	ll	lm	lm	ll	ll	lm	ll	lm	lm	ll	lm	lm	lm	lm	lm	lm	lm	lm	ll	lm	lm	lm	ll	ll	ll	lm	ll	ll	ll	lm	ll	lm
Marker65943	lmxll	ll	lm	ll	ll	lm	ll	ll	ll	ll	lm	ll	ll	lm	ll	ll	lm	ll	lm	lm	ll	ll	lm	ll	lm	lm	ll	lm	lm	lm	lm	lm	lm	lm	lm	ll	lm	lm	lm	ll	ll	ll	lm	ll	ll	ll	lm	ll	lm
Marker359019	lmxll	lm	ll	lm	lm	ll	lm	lm	lm	lm	ll	lm	lm	ll	lm	lm	ll	lm	ll	ll	lm	lm	ll	lm	ll	ll	lm	ll	ll	ll	ll	ll	ll	ll	ll	lm	ll	ll	ll	lm	lm	lm	ll	lm	lm	lm	ll	lm	ll
Marker146284	lmxll	lm	ll	lm	lm	ll	lm	lm	lm	lm	ll	lm	lm	ll	lm	lm	ll	lm	ll	ll	lm	lm	ll	lm	ll	ll	lm	ll	ll	ll	ll	ll	ll	ll	ll	lm	ll	ll	ll	lm	lm	lm	ll	lm	lm	lm	ll	lm	ll
Marker234989	lmxll	lm	ll	lm	lm	ll	lm	lm	lm	lm	ll	lm	lm	ll	lm	lm	ll	lm	ll	ll	lm	lm	ll	lm	ll	ll	lm	ll	ll	ll	ll	ll	ll	ll	ll	lm	ll	ll	ll	lm	lm	lm	ll	lm	lm	lm	ll	lm	ll
Marker400058	lmxll	lm	ll	lm	lm	ll	lm	lm	lm	lm	ll	lm	lm	ll	lm	lm	ll	lm	ll	ll	lm	lm	ll	lm	ll	ll	lm	ll	ll	ll	ll	ll	ll	ll	ll	lm	ll	ll	ll	lm	lm	lm	ll	lm	lm	lm	ll	lm	ll
Marker223897	lmxll	lm	ll	lm	lm	ll	lm	lm	lm	lm	ll	lm	lm	ll	lm	lm	ll	lm	ll	ll	lm	lm	ll	lm	ll	ll	lm	ll	ll	ll	ll	ll	ll	ll	ll	lm	ll	ll	ll	lm	lm	lm	ll	lm	lm	lm	ll	lm	ll
Marker77128	lmxll	ll	lm	ll	ll	lm	ll	ll	ll	ll	lm	ll	ll	lm	ll	ll	lm	ll	lm	lm	ll	ll	lm	ll	lm	lm	ll	lm	lm	lm	lm	lm	lm	lm	lm	ll	lm	lm	lm	ll	ll	ll	lm	ll	ll	ll	lm	ll	lm
Marker437575	lmxll	ll	lm	ll	ll	lm	ll	ll	ll	ll	lm	ll	ll	lm	ll	ll	lm	ll	lm	lm	ll	ll	lm	ll	lm	lm	ll	lm	lm	lm	lm	lm	lm	lm	lm	ll	lm	lm	lm	ll	ll	ll	lm	ll	ll	ll	lm	ll	lm
Marker244749	lmxll	ll	lm	ll	ll	lm	ll	ll	ll	ll	lm	ll	ll	lm	ll	ll	lm	ll	lm	lm	ll	ll	lm	ll	lm	lm	ll	lm	lm	lm	lm	lm	lm	lm	lm	ll	lm	lm	lm	ll	ll	ll	lm	ll	ll	ll	lm	ll	lm
Marker319212	lmxll	ll	lm	ll	ll	lm	ll	ll	ll	ll	lm	ll	ll	lm	ll	ll	lm	ll	lm	lm	ll	ll	lm	ll	lm	lm	ll	lm	lm	lm	lm	lm	lm	lm	lm	ll	lm	lm	lm	ll	ll	ll	lm	ll	ll	ll	lm	ll	lm
Marker269025	lmxll	ll	lm	ll	ll	lm	ll	ll	ll	ll	lm	ll	ll	lm	ll	ll	lm	ll	lm	lm	ll	ll	lm	ll	lm	lm	ll	lm	lm	lm	lm	lm	lm	lm	lm	ll	lm	lm	lm	ll	ll	ll	lm	ll	ll	ll	lm	ll	lm
Marker406956	lmxll	lm	ll	lm	lm	ll	lm	lm	lm	lm	ll	lm	lm	ll	lm	lm	ll	lm	ll	ll	lm	lm	ll	lm	ll	ll	lm	ll	ll	ll	ll	ll	ll	ll	ll	lm	ll	ll	ll	lm	lm	lm	ll	lm	lm	lm	ll	lm	ll
Marker248801	lmxll	ll	lm	ll	ll	lm	ll	ll	ll	ll	lm	ll	ll	lm	ll	ll	lm	ll	lm	lm	ll	ll	lm	ll	lm	lm	ll	lm	lm	lm	lm	lm	lm	lm	lm	ll	lm	lm	lm	ll	ll	ll	lm	ll	ll	ll	lm	ll	lm
Marker209776	lmxll	lm	ll	lm	lm	ll	lm	lm	lm	lm	ll	lm	lm	ll	lm	lm	lm	lm	ll	ll	lm	lm	ll	lm	ll	ll	lm	ll	ll	ll	ll	ll	ll	ll	ll	lm	ll	ll	ll	lm	lm	lm	ll	lm	lm	lm	ll	lm	ll
Marker389513	lmxll	lm	ll	lm	lm	ll	lm	lm	lm	lm	ll	lm	lm	ll	lm	lm	lm	lm	ll	ll	lm	lm	ll	lm	ll	ll	lm	ll	ll	ll	ll	ll	ll	ll	ll	lm	ll	ll	ll	lm	lm	lm	ll	lm	lm	lm	ll	lm	ll
Marker636415	lmxll	ll	lm	ll	ll	lm	ll	ll	ll	ll	lm	ll	ll	lm	ll	ll	ll	ll	lm	lm	ll	ll	lm	ll	lm	lm	ll	lm	lm	lm	lm	lm	lm	lm	lm	ll	lm	lm	lm	ll	ll	ll	lm	ll	ll	ll	lm	ll	lm
Marker392994	lmxll	lm	ll	lm	lm	ll	lm	lm	lm	lm	ll	lm	lm	ll	lm	lm	lm	lm	ll	ll	lm	lm	ll	lm	ll	ll	lm	ll	ll	ll	ll	ll	ll	ll	ll	lm	ll	ll	ll	lm	lm	lm	ll	lm	lm	lm	ll	lm	ll
Marker86014	lmxll	ll	lm	ll	ll	lm	ll	ll	ll	ll	lm	ll	ll	lm	ll	ll	ll	ll	lm	lm	ll	ll	lm	ll	lm	lm	ll	lm	lm	lm	lm	lm	lm	lm	lm	ll	lm	lm	lm	ll	ll	ll	lm	ll	ll	ll	lm	ll	lm
Marker333099	lmxll	lm	ll	lm	lm	ll	lm	lm	lm	lm	ll	lm	lm	ll	lm	lm	lm	lm	ll	ll	lm	lm	ll	lm	ll	ll	lm	ll	ll	ll	ll	ll	ll	ll	ll	lm	ll	ll	ll	lm	lm	lm	ll	lm	lm	lm	ll	lm	ll
Marker277972	lmxll	ll	lm	ll	ll	lm	ll	ll	ll	ll	lm	ll	ll	lm	ll	ll	ll	ll	lm	lm	ll	ll	lm	ll	lm	lm	ll	lm	lm	lm	lm	lm	lm	lm	lm	ll	lm	lm	lm	ll	ll	ll	lm	ll	ll	ll	lm	ll	lm
Marker428825	lmxll	lm	ll	lm	lm	ll	lm	lm	lm	lm	ll	lm	lm	ll	lm	lm	lm	lm	ll	ll	lm	lm	ll	lm	ll	ll	lm	ll	ll	ll	ll	ll	ll	ll	ll	lm	ll	ll	lm	lm	lm	lm	ll	lm	lm	lm	ll	lm	ll
Marker476394	lmxll	lm	ll	lm	lm	ll	lm	lm	lm	lm	ll	lm	lm	ll	lm	lm	lm	lm	ll	ll	lm	lm	ll	lm	ll	ll	lm	ll	ll	ll	ll	ll	ll	ll	ll	lm	ll	ll	lm	lm	lm	lm	ll	lm	lm	lm	ll	lm	ll
Marker269819	lmxll	ll	lm	ll	ll	lm	ll	ll	ll	ll	lm	ll	ll	lm	ll	ll	ll	ll	lm	lm	ll	ll	lm	ll	lm	lm	ll	lm	lm	lm	lm	lm	lm	lm	lm	ll	lm	lm	ll	ll	ll	ll	lm	ll	ll	ll	lm	ll	lm
Marker110909	lmxll	ll	lm	ll	ll	lm	ll	ll	ll	ll	lm	ll	ll	lm	ll	ll	ll	ll	lm	lm	ll	ll	lm	ll	lm	lm	ll	lm	lm	lm	lm	lm	lm	lm	lm	ll	lm	lm	ll	ll	ll	ll	lm	ll	ll	ll	lm	ll	lm
Marker297060	lmxll	ll	lm	ll	ll	lm	ll	ll	ll	ll	lm	ll	ll	lm	ll	ll	ll	ll	lm	lm	ll	ll	lm	ll	lm	lm	ll	lm	lm	lm	lm	lm	lm	lm	lm	ll	lm	lm	ll	ll	ll	ll	lm	ll	ll	ll	lm	ll	lm
Marker203606	lmxll	ll	lm	ll	ll	lm	ll	ll	ll	ll	lm	ll	ll	lm	ll	ll	ll	ll	lm	lm	ll	ll	lm	ll	lm	lm	ll	lm	lm	lm	lm	lm	lm	lm	lm	ll	lm	lm	ll	ll	ll	ll	lm	ll	ll	ll	lm	ll	lm
Marker170970	lmxll	ll	lm	ll	ll	lm	ll	ll	ll	ll	lm	ll	ll	lm	ll	ll	ll	ll	lm	lm	ll	ll	lm	ll	lm	lm	ll	lm	lm	lm	lm	lm	lm	lm	lm	ll	lm	lm	ll	ll	ll	ll	lm	ll	ll	ll	lm	ll	lm
Marker237187	lmxll	ll	lm	ll	ll	lm	ll	ll	ll	ll	lm	ll	ll	lm	ll	ll	ll	ll	lm	lm	ll	ll	lm	ll	lm	lm	ll	lm	lm	lm	lm	lm	lm	lm	lm	ll	lm	lm	ll	ll	ll	ll	lm	ll	ll	ll	lm	ll	lm
Marker333347	lmxll	lm	ll	lm	lm	ll	lm	lm	lm	lm	ll	lm	lm	ll	lm	lm	lm	lm	ll	ll	lm	lm	ll	lm	ll	ll	lm	ll	ll	ll	ll	ll	ll	ll	ll	lm	ll	ll	lm	lm	lm	lm	ll	lm	lm	lm	ll	lm	ll
Marker159590	lmxll	ll	lm	ll	ll	lm	ll	ll	ll	ll	lm	ll	ll	lm	ll	ll	ll	ll	lm	lm	ll	ll	lm	ll	lm	lm	ll	lm	lm	lm	lm	lm	lm	lm	lm	ll	lm	lm	ll	ll	ll	ll	lm	ll	ll	ll	lm	ll	lm
Marker205786	lmxll	ll	lm	ll	ll	lm	ll	ll	ll	ll	lm	ll	ll	lm	ll	ll	ll	ll	lm	lm	ll	ll	lm	ll	lm	lm	ll	lm	lm	lm	lm	lm	lm	lm	lm	ll	lm	lm	ll	ll	ll	ll	lm	ll	ll	ll	lm	ll	lm
Marker356600	lmxll	lm	ll	lm	lm	ll	lm	lm	lm	lm	ll	lm	lm	ll	lm	lm	lm	lm	ll	ll	lm	lm	ll	lm	ll	ll	lm	ll	ll	ll	ll	ll	ll	ll	ll	lm	ll	ll	lm	lm	lm	lm	ll	lm	lm	lm	ll	lm	ll
Marker151321	lmxll	ll	lm	ll	ll	lm	ll	ll	ll	ll	lm	ll	ll	lm	ll	ll	ll	ll	lm	lm	ll	ll	lm	ll	lm	lm	ll	lm	lm	lm	lm	lm	lm	lm	lm	ll	lm	lm	ll	ll	ll	ll	lm	ll	ll	ll	lm	ll	lm
Marker318164	lmxll	ll	lm	ll	ll	lm	ll	ll	ll	ll	lm	ll	ll	lm	ll	ll	ll	ll	lm	lm	ll	ll	lm	ll	lm	lm	ll	lm	lm	lm	lm	lm	lm	lm	lm	ll	lm	lm	ll	ll	ll	ll	lm	ll	ll	ll	lm	ll	lm
Marker79196	lmxll	lm	ll	lm	lm	ll	lm	lm	lm	lm	ll	lm	lm	ll	lm	lm	lm	lm	ll	ll	lm	lm	ll	lm	ll	ll	lm	ll	ll	ll	ll	ll	ll	ll	ll	lm	ll	ll	lm	lm	lm	lm	ll	lm	lm	lm	ll	lm	ll
Marker110800	lmxll	lm	ll	lm	lm	ll	lm	lm	lm	lm	ll	lm	lm	ll	lm	lm	lm	lm	ll	ll	lm	lm	ll	lm	ll	ll	lm	ll	ll	ll	ll	ll	ll	ll	ll	lm	ll	ll	lm	lm	lm	lm	ll	lm	lm	lm	ll	lm	ll
Marker43331	lmxll	lm	ll	lm	lm	ll	lm	lm	lm	lm	ll	lm	lm	lm	lm	lm	lm	lm	ll	ll	lm	lm	ll	lm	ll	ll	lm	ll	ll	ll	ll	ll	ll	ll	ll	lm	ll	ll	lm	lm	lm	lm	ll	lm	lm	lm	ll	lm	ll
Marker419998	lmxll	lm	ll	lm	lm	ll	lm	lm	lm	lm	ll	lm	lm	lm	lm	lm	lm	lm	ll	ll	lm	lm	ll	lm	ll	ll	lm	ll	ll	ll	ll	ll	ll	ll	ll	lm	ll	ll	lm	lm	lm	lm	ll	lm	lm	lm	ll	lm	ll
Marker122273	lmxll	ll	lm	ll	ll	lm	ll	ll	ll	ll	lm	ll	ll	ll	ll	ll	ll	ll	lm	lm	ll	ll	lm	ll	lm	lm	ll	lm	lm	lm	lm	lm	lm	lm	lm	ll	lm	lm	ll	ll	ll	ll	lm	ll	ll	ll	lm	ll	lm
Marker250348	lmxll	lm	ll	lm	lm	ll	lm	lm	lm	lm	ll	lm	lm	lm	lm	lm	lm	lm	ll	ll	lm	lm	ll	lm	ll	ll	lm	ll	ll	ll	ll	ll	ll	ll	ll	lm	ll	ll	lm	lm	lm	lm	ll	lm	lm	lm	ll	lm	ll
[truncated: 575 more rows]
[truncated: 33 more columns]
