# Supplementary material
Source: MDPI journal article supplement (https://www.mdpi.com/1999-4907/14/8/1591)
Supplement: s1 [file s1 › File S3 The SLAF markers as well as their locations on the 11 linkage groups (LGs) for the integrated map.xlsx]

## Sheet: Sheet1
Marker309219	1	0
Marker238503	1	0
Marker259018	1	1.25
Marker414446	1	3.124
Marker423500	1	3.124
Marker553080	1	4.86
Marker135520	1	7.174
Marker149295	1	7.373
Marker28115	1	7.373
Marker329826	1	13.195
Marker546396	1	15.509
Marker29038	1	17.848
Marker293412	1	19.229
Marker257832	1	22.024
Marker320470	1	22.836
Marker236941	1	23.405
Marker228021	1	23.405
Marker68954	1	23.978
Marker421208	1	27.494
Marker209244	1	27.494
Marker137213	1	28.637
Marker576388	1	30.951
Marker204198	1	32.093
Marker333111	1	33.235
Marker95600	1	33.235
Marker408941	1	33.235
Marker112171	1	33.88
Marker434841	1	33.88
Marker119180	1	34.378
Marker773855	1	34.378
Marker506766	1	37.894
Marker301557	1	37.894
Marker67682	1	41.155
Marker186193	1	41.155
Marker333899	1	42.535
Marker83845	1	43.915
Marker583927	1	43.915
Marker190667	1	43.915
Marker50043	1	43.915
Marker212485	1	43.915
Marker348741	1	43.915
Marker112450	1	43.915
Marker379726	1	44.54
Marker402464	1	45.165
Marker235776	1	45.165
Marker309145	1	45.79
Marker110655	1	45.79
Marker441591	1	45.79
Marker260815	1	45.79
Marker281708	1	45.79
Marker190373	1	45.79
Marker162097	1	45.79
Marker245861	1	58.271
Marker540915	1	58.271
Marker406786	1	58.271
Marker316997	1	58.271
Marker95513	1	58.661
Marker254339	1	58.661
Marker353198	1	58.661
Marker578772	1	58.661
Marker345429	1	58.661
Marker398682	1	62.328
Marker355112	1	62.328
Marker86390	1	62.328
Marker154801	1	63.023
Marker515912	1	63.023
Marker445655	1	64.432
Marker38722	1	64.432
Marker119176	1	64.432
Marker183219	1	64.432
Marker357691	1	65.057
Marker252068	1	65.057
Marker155311	1	65.682
Marker149753	1	65.682
Marker354318	1	65.682
Marker137945	1	65.682
Marker372786	1	65.682
Marker92881	1	67.606
Marker365463	1	67.606
Marker193378	1	67.606
Marker369455	1	70.013
Marker266274	1	70.013
Marker425000	1	70.795
Marker126954	1	70.795
Marker262670	1	70.795
Marker412848	1	70.795
Marker219682	1	71.576
Marker283785	1	71.576
Marker619670	1	71.576
Marker269384	1	71.576
Marker291985	1	71.576
Marker769957	1	72.358
Marker41682	1	72.358
Marker107937	1	72.358
Marker303692	1	72.358
Marker383097	1	73.14
Marker233375	1	73.922
Marker301358	1	73.922
Marker490811	1	73.922
Marker532507	1	73.922
Marker231827	1	76.454
Marker236234	1	76.454
Marker377242	1	76.454
Marker319558	1	76.454
Marker581567	1	76.454
Marker334444	1	76.454
Marker311721	1	76.454
Marker172320	1	76.454
Marker253496	1	76.454
Marker308194	1	76.454
Marker237364	1	81.149
Marker334053	1	81.149
Marker17195	1	82.278
Marker213960	1	82.278
Marker458855	1	82.278
Marker33787	1	82.278
Marker41249	1	82.278
Marker315176	1	82.278
Marker89580	1	82.278
Marker126270	1	82.278
Marker214270	1	82.278
Marker92169	1	82.278
Marker486652	1	82.278
Marker279655	1	82.278
Marker262890	1	82.278
Marker292546	1	82.903
Marker111823	1	82.903
Marker563820	1	84.511
Marker390030	1	87.767
Marker150860	1	87.767
Marker242231	1	87.767
Marker552180	1	87.767
Marker441624	1	87.767
Marker168276	1	87.767
Marker92036	1	87.767
Marker253418	1	88.293
Marker150382	1	88.293
Marker520548	1	93.683
Marker587210	1	93.683
Marker203505	1	93.683
Marker186935	1	94.706
Marker90084	1	94.706
Marker322699	1	94.706
Marker196979	1	95.728
Marker48346	1	95.728
Marker452545	1	96.751
Marker421149	1	96.751
Marker466118	1	98.823
Marker51924	1	100.894
Marker269337	1	101.917
Marker204730	1	101.917
Marker243833	1	101.917
Marker492686	1	101.917
Marker140144	1	101.917
Marker487506	1	102.784
Marker377750	1	104.154
Marker681966	1	106.392
Marker131667	1	106.392
Marker142669	1	106.392
Marker111484	1	106.392
Marker436555	1	106.392
Marker632365	1	107.62
Marker191462	1	107.664
Marker118011	1	110.242
Marker142880	1	111.515
Marker295172	1	114.093
Marker64943	1	114.093
Marker236364	1	115.299
Marker119569	1	120.313
Marker206274	1	121.519
Marker252722	1	122.725
Marker135866	1	123.93
Marker302168	1	126.372
Marker205249	1	128.815
Marker510222	1	128.815
Marker76041	1	128.815
Marker399657	1	130.065
Marker196690	2	0
Marker420786	2	0
Marker215820	2	5.199
Marker97061	2	11.788
Marker137170	2	11.788
Marker15357	2	13.038
Marker56671	2	16.886
Marker483906	2	18.136
Marker586664	2	23.336
Marker576298	2	24.586
Marker427369	2	25.836
Marker588277	2	27.086
Marker471209	2	27.086
Marker515604	2	28.336
Marker339072	2	28.336
Marker464235	2	29.586
Marker455027	2	29.586
Marker83255	2	30.163
Marker396685	2	30.836
Marker198745	2	32.086
Marker85678	2	33.336
Marker251518	2	35.868
Marker64268	2	38.401
Marker335401	2	39.651
Marker358390	2	39.651
Marker324154	2	40.62
Marker298909	2	41.59
Marker176305	2	42.56
Marker336026	2	45.545
Marker68909	2	45.545
Marker34195	2	45.545
Marker669060	2	51.765
Marker277262	2	51.765
Marker119683	2	51.765
Marker279115	2	53.73
Marker180744	2	54.7
Marker347460	2	54.7
Marker515710	2	58.733
Marker233583	2	59.703
Marker176495	2	59.703
Marker166905	2	60.673
Marker446253	2	63.658
Marker332355	2	64.628
Marker224205	2	65.598
Marker522681	2	66.568
Marker155500	2	67.538
Marker345828	2	67.538
Marker160860	2	67.538
Marker41653	2	67.538
Marker268378	2	67.538
Marker410891	2	67.538
Marker440640	2	67.538
Marker278303	2	67.538
Marker144815	2	68.508
Marker259074	2	68.508
Marker211639	2	68.508
Marker123879	2	68.508
Marker291517	2	68.508
Marker396204	2	68.508
Marker219980	2	68.508
Marker175002	2	68.508
Marker274928	2	68.508
Marker178589	2	68.508
Marker369123	2	68.508
Marker58757	2	68.508
Marker182831	2	69.477
Marker87276	2	69.477
Marker60212	2	69.477
Marker396484	2	70.727
Marker404061	2	70.727
Marker496779	2	73.26
Marker36496	2	73.26
Marker88291	2	74.51
Marker64233	2	74.51
Marker245679	2	74.51
Marker159127	2	74.51
Marker445965	2	74.51
Marker457865	2	75.76
Marker256938	2	75.76
Marker250999	2	75.76
Marker114868	2	75.76
Marker299483	2	75.76
Marker553257	2	75.76
Marker157270	2	75.76
Marker442036	2	75.76
Marker471333	2	75.76
Marker355571	2	75.76
Marker224675	2	77.01
Marker540764	2	77.01
Marker382383	2	77.01
Marker383150	2	77.01
Marker456843	2	78.26
Marker228835	2	78.26
Marker468224	2	79.51
Marker284681	2	82.042
Marker369971	2	83.292
Marker448774	2	83.292
Marker417516	2	84.542
Marker265766	2	89.742
Marker589240	2	92.274
Marker112751	2	92.274
Marker321327	2	93.524
Marker25321	2	98.723
Marker67292	2	98.723
Marker149969	2	101.256
Marker192440	2	105.104
Marker401060	2	105.104
Marker210848	2	105.104
Marker90960	3	0
Marker45593	3	0
Marker360129	3	11.003
Marker222217	3	11.003
Marker139662	3	13.535
Marker130678	3	13.535
Marker205520	3	17.383
Marker144860	3	19.916
Marker248128	3	19.916
Marker332636	3	19.916
Marker245348	3	21.166
Marker249666	3	21.166
Marker146785	3	23.698
Marker441375	3	26.23
Marker184788	3	30.078
Marker175886	3	30.078
Marker783418	3	31.328
Marker345247	3	32.578
Marker419750	3	35.11
Marker111543	3	38.958
Marker389120	3	40.208
Marker410663	3	42.741
Marker136145	3	43.991
Marker282756	3	43.991
Marker233349	3	45.241
Marker393934	3	49.089
Marker61593	3	51.621
Marker484859	3	54.153
Marker661051	3	55.403
Marker88027	3	56.653
Marker280272	3	56.653
Marker437486	3	61.403
Marker130881	3	61.403
Marker433063	3	61.403
Marker520906	3	62.884
Marker328996	3	62.884
Marker241868	3	62.884
Marker266728	3	68.18
Marker477771	3	68.18
Marker154722	3	68.18
Marker293791	3	68.878
Marker352442	3	68.878
Marker240729	3	69.759
Marker58349	3	69.759
Marker275998	3	69.759
Marker133075	3	69.759
Marker484951	3	71.028
Marker117336	3	71.028
Marker363225	3	71.028
Marker142522	3	71.028
Marker385865	3	71.028
Marker323686	3	73.178
Marker148495	3	73.178
Marker47136	3	73.178
Marker462832	3	75.329
Marker218601	3	77.479
Marker348802	3	77.479
Marker318135	3	77.479
Marker582017	3	81.834
Marker377575	3	83.984
Marker41937	3	83.984
Marker545300	3	83.984
Marker162318	3	83.984
Marker360166	3	83.984
Marker228639	3	83.984
Marker492733	3	83.984
Marker425652	3	83.984
Marker184590	3	83.984
Marker388816	3	88.34
Marker440311	3	88.34
Marker435722	3	88.34
Marker102186	3	88.34
Marker420572	3	88.34
Marker361588	3	88.34
Marker138966	3	88.34
Marker260521	3	88.34
Marker534026	3	90.49
Marker265068	3	94.846
Marker235698	3	94.846
Marker326597	3	94.846
Marker221091	3	94.846
Marker382659	3	94.846
Marker284033	3	94.846
Marker242301	3	96.996
Marker27428	3	96.996
Marker260979	3	96.996
Marker163671	3	96.996
Marker306327	3	96.996
Marker243574	3	96.996
Marker151547	3	96.996
Marker344397	3	96.996
Marker337887	3	99.146
Marker47337	3	99.146
Marker122080	3	99.146
Marker224010	3	99.146
Marker274838	3	99.146
Marker73209	3	101.296
Marker670165	3	101.296
Marker265678	3	101.296
Marker447788	3	101.296
Marker368521	3	101.296
Marker237852	3	101.296
Marker117216	3	101.296
Marker303775	3	103.446
Marker195889	3	103.446
Marker124719	3	103.446
Marker278973	3	103.446
Marker153705	3	105.597
Marker486247	3	105.597
Marker161253	3	105.597
Marker291565	3	105.597
Marker232932	3	105.597
Marker61740	3	105.597
Marker271338	3	105.597
Marker321807	3	105.597
Marker175937	3	105.597
Marker186955	3	105.597
Marker432693	3	105.597
Marker484877	3	105.597
Marker128890	3	105.597
Marker143841	3	105.597
Marker127239	3	105.597
Marker182179	3	105.597
Marker752066	3	105.962
Marker141256	3	107.747
Marker50902	3	107.747
Marker314117	3	107.747
Marker348148	3	107.747
Marker416660	3	107.747
Marker166697	3	107.747
Marker378767	3	107.747
Marker64736	3	107.747
Marker771998	3	107.747
Marker217432	3	107.747
Marker47952	3	107.747
Marker536096	3	107.747
Marker351776	3	109.266
Marker409450	3	109.266
Marker267086	3	109.266
Marker360076	3	109.266
Marker162622	3	111.016
Marker388480	3	112.343
Marker225204	3	112.343
Marker296718	3	113.862
Marker213458	3	113.862
Marker80597	3	113.862
Marker201029	3	113.862
Marker247460	3	113.862
Marker295982	3	113.862
Marker149472	3	113.862
Marker255931	3	113.862
Marker166568	3	113.862
Marker277072	3	113.862
Marker214922	3	113.862
Marker49481	3	113.862
Marker375717	3	113.862
Marker149067	3	113.862
Marker468581	3	113.862
Marker268066	3	113.862
Marker46344	3	113.862
Marker259685	3	113.862
Marker17853	3	115.381
Marker197482	3	115.381
Marker369136	3	117.827
Marker111535	3	117.827
Marker204328	3	118.459
Marker343983	3	118.459
Marker119016	3	118.459
Marker370321	3	118.459
Marker121843	3	118.459
Marker216795	3	118.459
Marker92047	3	118.459
Marker634474	3	118.459
Marker509428	3	118.459
Marker79487	3	119.978
Marker187075	3	119.978
Marker256712	3	119.978
Marker234746	3	119.978
Marker125332	3	119.978
Marker52474	3	119.978
Marker424285	3	119.978
Marker194444	3	119.978
Marker280716	3	119.978
Marker99611	3	119.978
Marker342820	3	119.978
Marker287105	3	119.978
Marker239737	3	120.603
Marker125307	3	121.228
Marker263601	3	121.228
Marker39955	3	121.228
Marker594309	3	121.228
Marker761884	3	121.228
Marker130947	3	121.228
Marker98288	3	122.494
Marker118998	3	122.494
Marker190482	3	122.494
Marker475200	3	123.119
Marker386149	3	123.119
Marker203871	3	123.119
Marker206122	3	123.119
Marker93932	3	123.119
Marker272460	3	123.119
Marker67045	3	123.119
Marker356428	3	123.119
Marker270107	3	123.119
Marker413118	3	123.119
Marker336034	3	123.119
Marker355928	3	123.119
Marker93237	3	123.119
Marker162183	3	123.119
Marker130193	3	123.119
Marker448676	3	123.119
Marker52301	3	123.119
Marker266681	3	123.119
Marker303795	3	123.119
Marker296008	3	123.119
Marker143654	3	123.119
Marker372300	3	124.669
Marker469738	3	124.669
Marker484234	3	124.669
Marker291301	3	126.22
Marker525305	3	126.22
Marker232518	3	127.771
Marker297981	3	127.771
Marker356559	3	127.771
Marker430283	3	127.771
Marker337894	3	127.771
Marker354402	3	127.771
Marker149004	3	128.638
Marker360054	3	129.321
Marker230391	3	129.321
Marker211052	3	129.321
Marker321676	3	129.321
Marker387806	3	130.872
Marker394614	3	130.872
Marker339294	3	132.422
Marker380981	3	132.422
Marker112189	3	132.422
Marker499809	3	132.422
Marker130609	3	132.422
Marker646123	3	132.422
Marker91115	3	132.422
Marker428347	3	132.422
Marker476107	3	133.973
Marker495591	3	135.523
Marker87014	3	135.523
Marker208290	3	135.523
Marker480707	3	138.664
Marker427451	3	138.664
Marker537211	3	138.664
Marker41505	3	141.805
Marker125890	3	141.805
Marker74491	3	141.805
Marker255646	3	143.356
Marker248307	3	143.356
Marker435926	3	143.356
Marker94355	3	143.356
Marker758751	3	143.356
Marker147653	3	143.356
Marker228528	3	143.356
Marker207098	3	143.356
Marker428338	3	143.356
Marker476471	3	143.356
Marker414148	3	143.356
Marker74935	3	143.356
Marker133571	3	143.356
Marker245069	3	143.356
Marker436001	3	143.356
Marker311336	3	143.356
Marker386133	3	143.356
Marker160301	3	143.981
Marker171723	3	145.231
Marker563460	3	145.231
Marker189110	3	145.231
Marker233876	3	145.231
Marker313984	3	147.763
Marker297341	3	147.763
Marker120320	3	147.763
Marker229421	3	147.763
Marker308160	3	149.013
Marker202855	3	149.013
Marker201807	3	149.013
Marker116827	3	149.013
Marker52898	3	149.013
Marker368659	3	150.263
Marker195940	3	150.263
Marker152608	3	150.263
Marker288296	3	150.263
Marker217593	3	151.513
Marker732598	3	151.513
Marker164507	3	151.513
Marker255565	3	151.513
Marker302314	3	151.513
Marker389150	3	152.763
Marker171782	3	152.763
Marker382939	3	152.763
Marker157109	3	152.763
Marker357921	3	152.763
Marker224052	3	152.763
Marker106625	3	154.013
Marker121313	3	154.013
Marker191876	3	154.013
Marker433661	3	154.013
Marker720826	3	154.013
Marker153318	3	154.013
Marker110632	3	154.013
Marker311699	3	155.263
Marker154411	3	155.263
Marker280926	3	155.263
Marker389464	3	155.263
Marker297384	3	155.263
Marker395901	3	155.263
Marker506546	3	155.263
Marker600616	3	155.263
Marker399872	3	156.513
Marker517429	3	156.513
Marker440710	3	156.513
Marker328830	3	156.513
Marker259317	3	156.513
Marker404489	3	156.513
Marker605020	3	156.513
Marker208550	3	156.513
Marker468896	3	156.513
Marker223478	3	157.763
Marker162317	3	157.763
Marker176951	3	157.763
Marker378243	3	159.013
Marker356193	3	159.013
Marker82928	3	159.013
Marker253011	3	159.013
Marker256059	3	159.013
Marker202191	3	164.213
Marker401232	3	164.213
Marker301278	3	164.213
Marker407723	3	164.213
Marker170063	3	165.463
Marker395668	3	165.463
Marker100399	3	167.995
Marker646600	3	167.995
Marker100248	3	167.995
Marker397308	3	168.362
Marker421201	3	168.362
Marker98428	3	168.362
Marker234185	3	168.362
Marker235825	3	168.362
Marker330951	3	168.362
Marker149701	3	169.245
Marker304560	3	169.245
Marker639344	3	169.245
Marker680921	3	169.245
Marker596110	3	169.245
Marker409476	3	169.245
Marker78769	3	169.245
Marker319440	3	169.245
Marker363077	3	169.245
Marker232690	3	169.245
Marker329210	3	169.245
Marker208422	3	173.093
Marker149777	3	173.093
Marker114792	3	173.093
Marker172999	3	173.561
Marker234687	3	175.625
Marker500811	3	175.625
Marker288895	3	178.158
Marker222650	3	180.69
Marker269785	3	181.94
Marker269047	3	184.472
Marker179456	3	184.472
Marker189023	3	184.472
Marker769810	3	184.472
Marker239559	3	184.472
Marker159939	3	184.472
Marker212360	3	184.472
Marker514723	3	187.004
Marker160215	3	187.004
Marker511469	3	188.254
Marker301583	3	189.504
Marker396563	3	192.037
Marker115306	3	192.037
Marker63779	3	192.917
Marker130980	3	193.287
Marker177917	3	193.287
Marker117653	3	193.287
Marker153744	3	193.287
Marker253291	3	195.819
Marker125306	3	195.819
Marker380528	3	195.819
Marker272411	4	0
Marker536378	4	0
Marker210840	4	0
Marker263541	4	0
Marker454167	4	7.729
Marker457187	4	7.729
Marker137991	4	12.929
Marker522481	4	14.179
Marker403324	4	14.179
Marker392230	4	14.179
Marker252248	4	14.179
Marker590137	4	14.179
Marker183732	4	14.179
Marker169873	4	14.179
Marker342462	4	14.179
Marker508056	4	14.179
Marker276828	4	14.179
Marker157951	4	16.687
Marker414582	4	17.502
Marker230074	4	18.317
Marker351239	4	19.968
Marker129061	4	19.968
Marker250962	4	19.968
Marker313714	4	20.783
Marker534919	4	20.783
Marker147693	4	20.783
Marker351511	4	20.783
Marker233467	4	20.783
Marker157398	4	22.434
Marker129828	4	22.434
Marker93677	4	22.434
Marker246194	4	22.434
Marker379953	4	22.434
Marker209377	4	22.434
Marker367726	4	24.369
Marker343197	4	28.29
Marker399205	4	28.29
Marker137313	4	28.29
Marker362353	4	28.29
Marker305707	4	28.29
Marker54579	4	28.29
Marker340041	4	28.29
Marker378406	4	29.441
Marker417226	4	30.364
Marker541059	4	31.287
Marker593693	4	31.287
Marker205299	4	32.21
Marker156623	4	34.145
Marker328349	4	36.081
Marker428691	4	36.081
Marker108258	4	36.081
Marker349198	4	36.081
Marker302215	4	37.208
Marker648750	4	37.208
Marker208819	4	38.131
Marker556787	4	40.001
Marker156217	4	40.001
Marker266294	4	40.001
Marker116991	4	40.001
Marker465970	4	40.001
Marker459383	4	40.001
Marker165007	4	40.925
Marker355918	4	40.925
Marker510948	4	40.925
Marker127911	4	43.913
Marker369634	4	43.913
Marker144665	4	43.913
Marker78548	4	45.845
Marker643529	4	45.845
Marker431201	4	46.852
Marker623555	4	46.852
Marker244728	4	46.852
Marker359762	4	47.776
Marker100411	4	47.776
Marker218508	4	47.776
Marker362139	4	48.55
Marker93096	4	49.323
Marker175192	4	49.323
Marker347966	4	49.323
Marker296826	4	49.323
Marker411385	4	51.03
Marker222299	4	51.03
Marker142864	4	51.03
Marker87651	4	51.03
Marker173070	4	51.03
Marker456855	4	54.285
Marker230890	4	54.285
Marker364280	4	54.285
Marker156340	4	55.109
Marker402615	4	55.109
Marker413334	4	55.109
Marker122261	4	55.109
Marker651569	4	55.109
Marker297787	4	56.869
Marker347270	4	56.869
Marker209180	4	56.869
Marker533368	4	56.869
Marker33892	4	56.869
Marker383093	4	59.454
Marker511189	4	59.454
Marker186590	4	59.454
Marker250581	4	59.454
Marker389046	4	59.454
Marker296228	4	62.054
Marker160242	4	62.054
Marker285936	4	62.679
Marker108865	4	62.679
Marker341308	4	62.679
Marker486361	4	62.679
Marker446927	4	62.679
Marker278215	4	62.679
Marker95400	4	62.679
Marker224411	4	62.679
Marker239618	4	62.679
Marker258700	4	63.772
Marker106449	4	63.772
Marker429965	4	63.772
Marker160016	4	63.772
Marker223491	4	64.866
Marker365960	4	64.866
Marker18697	4	69.415
Marker631689	4	69.415
Marker344012	4	69.415
Marker12465	4	69.415
Marker187112	4	69.415
Marker146408	4	69.415
Marker472334	4	69.415
Marker105091	4	70.508
Marker275522	4	70.508
Marker336250	4	71.602
Marker228047	4	71.602
Marker325195	4	71.602
Marker397684	4	73.75
Marker303954	4	73.75
Marker462506	4	74.968
Marker271149	4	74.968
Marker394876	4	76.705
Marker315388	4	76.705
Marker354631	4	79.517
Marker334284	4	79.517
Marker275075	4	79.517
Marker99781	4	79.517
Marker176115	4	79.517
Marker194120	4	79.517
Marker137684	4	79.66
Marker110459	4	79.66
Marker598746	4	79.66
Marker271745	4	79.66
Marker146960	4	79.66
Marker386448	4	79.66
Marker201919	4	79.66
Marker81278	4	79.66
Marker468835	4	82.615
Marker363438	4	82.615
Marker214951	4	82.615
Marker302301	4	82.615
Marker39706	4	82.615
Marker91468	4	82.884
Marker601835	4	82.884
Marker198808	4	83.977
Marker143629	4	84.074
Marker274646	4	84.074
Marker195881	4	86.193
Marker119562	4	86.193
Marker227139	4	86.193
Marker182728	4	86.193
Marker342111	4	86.193
Marker591050	4	86.193
Marker112605	4	87.029
Marker136043	4	87.029
Marker310225	4	87.029
Marker353514	4	87.029
Marker23115	4	87.029
Marker436653	4	87.029
Marker365262	4	87.029
Marker109907	4	88.408
Marker568658	4	88.408
Marker110816	4	88.408
Marker162094	4	88.408
Marker107096	4	89.984
Marker258825	4	89.984
Marker261257	4	89.984
Marker428849	4	91.442
Marker189133	4	91.442
Marker192574	4	91.442
Marker353647	4	91.442
Marker553147	4	91.442
Marker337349	4	91.442
Marker326090	4	91.442
Marker29985	4	95.422
Marker387924	4	95.422
Marker248084	4	95.422
Marker225070	4	96.515
Marker172192	4	96.515
Marker784185	4	96.515
Marker428139	4	97.51
Marker318980	4	97.51
Marker318393	4	97.51
Marker395412	4	97.51
Marker370312	4	97.51
Marker155713	4	97.51
Marker361983	4	97.51
Marker406572	4	97.51
Marker405432	4	97.51
Marker207318	4	97.51
Marker113484	4	97.51
Marker138887	4	97.51
Marker307379	4	97.51
Marker384983	4	97.51
Marker321087	4	97.51
Marker197897	4	97.51
Marker400838	4	97.609
Marker92487	4	97.609
Marker324572	4	97.609
Marker57178	4	97.609
Marker454582	4	98.703
Marker265880	4	98.703
Marker136713	4	98.703
Marker74423	4	100.465
Marker548538	4	100.465
Marker410329	4	100.465
Marker185851	4	100.465
Marker191868	4	100.465
Marker285464	4	100.465
Marker615261	4	102.069
Marker309594	4	102.069
Marker355769	4	102.069
Marker355286	4	102.069
Marker69547	4	102.069
Marker356023	4	103.419
Marker560977	4	103.419
Marker137536	4	103.419
Marker233035	4	103.419
Marker113962	4	106.374
Marker625333	4	106.374
Marker215243	4	106.374
Marker261603	4	106.374
Marker176053	4	107.833
Marker374924	4	107.833
Marker361999	4	107.833
Marker276255	4	107.833
Marker247790	4	107.833
Marker381769	4	107.833
Marker453419	4	107.833
Marker439389	4	107.833
Marker275830	4	112.439
Marker339931	4	113.313
Marker412555	4	113.313
Marker474346	4	113.313
Marker364618	4	113.313
Marker150492	4	114.187
Marker432238	4	114.187
Marker94463	4	114.187
Marker436876	4	114.187
Marker60812	4	121.906
Marker116045	4	121.906
Marker117701	4	121.906
Marker464293	4	121.906
Marker409906	4	121.906
Marker460673	4	121.906
Marker279399	4	121.906
Marker173852	4	121.906
Marker192606	4	124.1
Marker200046	4	124.1
Marker204976	4	124.1
Marker240786	4	124.1
Marker138563	4	124.1
Marker67698	4	125.176
Marker236330	4	125.176
Marker312829	4	125.176
Marker203873	4	125.176
Marker682277	4	126.252
Marker254862	4	126.252
Marker354528	4	126.252
Marker408076	4	127.122
Marker351614	4	127.122
Marker306698	4	127.122
Marker432838	4	127.122
Marker229843	4	127.122
Marker271013	4	127.122
Marker292806	4	127.122
Marker432360	4	127.327
Marker354322	4	127.327
Marker227346	4	127.327
Marker509207	4	128.403
Marker101195	4	128.403
Marker316926	4	128.403
Marker22891	4	128.403
Marker341471	4	128.403
Marker139125	4	128.403
Marker438735	4	131.715
Marker312680	4	131.715
Marker456126	4	131.715
Marker268716	4	131.715
Marker465391	4	131.715
Marker23976	4	132.516
Marker206099	4	132.516
Marker392216	4	132.516
Marker535975	4	133.318
Marker134961	4	133.318
Marker544129	4	136.654
Marker115845	4	136.654
Marker588887	4	136.654
Marker298132	4	137.456
Marker417267	4	137.456
Marker302131	4	137.456
Marker293303	4	137.456
Marker92564	4	137.456
Marker294705	4	137.456
Marker145664	4	137.456
Marker493510	4	137.456
Marker597910	4	139.569
Marker319477	4	139.569
Marker232651	4	139.569
Marker247902	4	139.569
Marker194828	4	139.569
Marker57697	4	140.613
Marker490122	4	140.613
Marker288288	4	140.613
Marker225986	4	140.613
Marker220795	4	141.799
Marker444002	4	141.934
Marker554984	4	141.934
Marker197773	4	141.934
Marker208179	4	141.934
Marker269446	4	141.934
Marker521553	4	141.934
Marker201389	4	141.934
Marker125636	4	141.934
Marker771409	4	141.934
Marker390816	4	141.934
Marker117661	4	144.203
Marker85129	4	144.203
Marker187140	4	144.203
Marker267024	4	144.203
Marker83180	4	144.203
Marker351737	4	144.203
Marker449781	4	144.203
Marker225453	4	147.427
Marker321692	4	147.427
Marker355369	4	147.427
Marker696965	4	147.427
Marker81013	4	147.427
Marker323426	4	148.748
Marker355117	4	150.069
Marker324419	4	150.069
Marker416129	4	150.069
Marker426081	4	153.208
Marker115045	4	153.208
Marker214747	4	153.208
Marker361701	4	153.208
Marker451077	4	154.395
Marker630508	4	154.395
Marker697895	4	154.395
Marker143471	4	154.395
Marker267918	4	154.395
Marker448390	4	154.395
Marker104361	4	155.582
Marker652908	4	155.582
Marker480705	4	156.768
Marker142792	4	156.768
Marker336617	4	157.955
Marker366435	4	159.141
Marker207427	4	159.141
Marker122452	4	159.141
Marker388828	4	159.141
Marker273591	4	159.141
Marker232191	4	159.141
Marker35109	4	160.093
Marker275347	4	160.093
Marker438722	4	160.093
Marker207401	4	160.093
Marker277216	4	160.093
Marker386271	4	160.328
Marker500376	4	160.328
Marker604878	4	160.328
Marker336711	4	160.328
Marker532623	4	160.328
Marker151124	4	160.328
Marker239238	4	161.414
Marker176793	4	161.414
Marker42176	4	162.731
Marker197415	4	162.731
Marker114949	4	162.735
Marker400821	4	167.667
Marker460923	4	167.667
Marker180835	4	167.667
Marker163608	4	167.667
Marker731946	4	167.667
Marker165420	4	167.667
Marker198765	4	167.667
Marker366251	4	167.667
Marker234847	4	167.667
Marker346344	4	167.667
Marker321897	4	169.696
Marker202475	4	169.696
Marker146428	4	169.696
Marker66305	4	169.696
Marker248463	4	169.696
Marker32443	4	169.696
Marker321012	4	169.696
Marker97761	4	171.017
Marker194060	4	171.319
Marker96048	4	171.319
Marker62752	4	171.319
Marker461511	4	172.506
Marker54210	4	172.506
Marker741212	4	173.692
Marker299164	4	173.692
Marker626929	4	173.692
Marker706412	4	173.692
Marker245894	4	173.692
Marker365453	4	173.692
Marker325629	4	174.693
Marker333647	4	176.722
Marker196729	4	177.061
Marker571989	4	177.061
Marker193061	4	177.723
Marker189576	4	177.723
Marker63936	4	177.723
Marker67548	4	178.724
Marker259617	4	178.724
Marker139097	4	178.724
Marker177358	4	178.724
Marker193210	4	181.257
Marker261181	4	181.257
Marker197168	4	181.257
Marker211391	4	181.257
Marker360041	4	181.257
Marker703216	4	182.507
Marker351864	4	185.039
Marker125564	4	185.039
Marker417591	4	186.289
Marker138315	4	188.821
Marker136738	4	190.071
Marker357225	4	191.321
Marker311954	4	191.321
Marker502235	4	192.571
Marker622304	4	192.571
Marker680769	4	192.571
Marker585206	4	192.571
Marker183830	4	193.821
Marker727714	4	193.821
Marker8575	4	193.821
Marker452097	5	0
Marker520143	5	0
Marker390190	5	8.017
Marker230754	5	8.017
Marker106011	5	8.017
Marker98685	5	8.017
Marker202873	5	8.083
Marker338678	5	8.083
Marker236774	5	8.083
Marker526817	5	10.615
Marker191354	5	11.865
Marker307870	5	11.865
Marker114211	5	13.744
Marker335689	5	15.623
Marker160167	5	17.502
Marker196259	5	17.502
Marker353138	5	19.381
Marker259557	5	19.381
Marker137551	5	33.884
Marker175947	5	33.884
Marker207857	5	34.821
Marker361128	5	34.821
Marker146179	5	34.821
Marker70740	5	34.821
Marker349252	5	34.821
Marker273732	5	34.821
Marker430465	5	34.821
Marker579651	5	34.821
Marker395031	5	34.821
Marker242971	5	34.821
Marker265934	5	34.821
Marker170424	5	34.821
Marker44852	5	35.757
Marker120090	5	40.694
Marker469042	5	40.694
Marker244529	5	42.318
Marker743514	5	43.119
Marker146479	5	43.119
Marker271246	5	43.53
Marker496102	5	43.53
Marker181901	5	43.53
Marker148885	5	43.53
Marker689671	5	43.53
Marker246039	5	44.743
Marker147587	5	44.743
Marker94367	5	44.743
Marker165417	5	46.367
Marker163766	5	46.367
Marker357435	5	46.367
Marker478056	5	46.367
Marker191139	5	46.367
Marker68305	5	46.367
Marker268186	5	46.367
Marker421103	5	50.221
Marker343478	5	50.239
Marker447719	5	52.124
Marker415758	5	52.124
Marker271291	5	52.124
Marker409040	5	52.124
Marker194776	5	52.124
Marker261167	5	52.124
Marker369711	5	52.124
Marker51470	5	52.124
Marker77366	5	54.425
Marker406345	5	55.939
Marker66271	5	55.939
Marker271477	5	55.939
Marker196110	5	55.939
Marker324526	5	55.939
Marker324784	5	55.939
Marker124019	5	55.939
Marker481323	5	55.939
Marker431502	5	55.939
Marker78199	5	55.939
Marker190361	5	55.939
Marker455660	5	55.939
Marker68115	5	55.939
Marker46643	5	55.939
Marker351903	5	55.939
Marker348974	5	55.939
Marker105656	5	55.939
Marker328461	5	55.939
Marker158714	5	55.939
Marker317464	5	55.939
Marker223686	5	55.939
Marker383035	5	55.939
Marker292395	5	55.939
Marker180725	5	57.624
Marker375366	5	58.455
Marker307446	5	58.455
Marker285083	5	58.455
Marker271413	5	59.705
Marker178881	5	59.705
Marker441049	5	59.705
Marker507756	5	59.705
Marker414492	5	59.705
Marker672828	5	59.705
Marker271245	5	59.705
Marker353213	5	59.705
Marker218582	5	60.33
Marker74426	5	60.33
Marker507432	5	60.33
Marker458481	5	60.33
Marker326061	5	60.33
Marker407492	5	60.33
Marker329141	5	60.33
Marker183651	5	60.33
Marker286320	5	60.33
Marker142448	5	60.33
Marker211903	5	60.33
Marker299387	5	61.597
Marker235348	5	63.279
Marker470078	5	64.961
Marker318337	5	64.961
Marker85839	5	66.644
Marker324614	5	68.326
Marker703870	5	68.326
Marker85856	5	68.326
Marker78524	5	72.103
Marker180177	5	72.103
Marker130891	5	72.103
Marker377143	5	74.63
Marker163481	5	74.63
Marker508121	5	74.63
Marker105325	5	74.63
Marker127065	5	74.63
Marker367633	5	74.63
Marker395316	5	74.63
Marker46574	5	74.63
Marker186367	5	74.63
Marker71824	5	74.63
Marker266066	5	74.63
Marker247262	5	75.688
Marker300719	5	75.688
Marker124143	5	75.688
Marker409418	5	76.156
Marker635766	5	76.156
Marker16875	5	76.156
Marker174898	5	76.156
Marker216155	5	76.746
Marker341953	5	78.89
Marker194824	5	78.89
Marker158902	5	78.89
Marker558736	5	80.856
Marker343079	5	80.856
Marker232607	5	81.034
Marker331435	5	82.382
Marker314167	5	83.909
Marker540221	5	85.436
Marker258215	5	85.436
Marker330259	5	86.267
Marker280510	5	87.099
Marker260542	5	87.952
Marker548373	5	88.783
Marker97655	5	90.468
Marker109764	5	90.468
Marker532299	5	90.468
Marker49913	5	90.468
Marker203730	5	90.468
Marker94464	5	90.468
Marker448873	5	91.718
Marker175113	5	91.718
Marker344895	5	91.718
Marker500616	5	91.718
Marker268289	5	91.718
Marker191066	5	91.718
Marker59477	5	91.718
Marker119317	5	91.718
Marker333580	5	91.718
Marker101421	5	91.718
Marker252958	5	91.718
Marker137934	5	99.956
Marker507585	5	99.956
Marker395646	5	101.206
Marker311853	5	102.456
Marker29217	5	104.988
Marker41513	5	113.005
Marker219168	5	115.537
Marker144600	5	115.537
Marker549392	5	125.025
Marker558982	5	125.025
Marker209961	5	127.558
Marker264100	5	128.808
Marker27058	5	128.808
Marker335307	5	128.808
Marker93864	5	130.058
Marker218837	5	131.308
Marker276053	5	132.558
Marker215313	5	133.808
Marker97110	5	135.058
Marker404035	5	136.308
Marker85366	5	136.308
Marker463779	5	136.308
Marker205666	6	0
Marker771630	6	0
Marker576939	6	0
Marker399684	6	0
Marker313204	6	0
Marker327707	6	5.074
Marker581032	6	5.074
Marker336653	6	9.392
Marker149559	6	11.174
Marker260428	6	14.784
Marker218197	6	16.566
Marker213294	6	16.566
Marker291356	6	20.176
Marker196144	6	21.406
Marker624499	6	21.958
Marker295314	6	21.958
Marker75827	6	21.958
Marker195962	6	21.958
Marker158392	6	27.444
Marker252455	6	29.226
Marker375023	6	29.226
Marker445249	6	29.226
Marker113695	6	31.008
Marker361049	6	32.79
Marker218013	6	33.609
Marker283446	6	34.572
Marker320714	6	34.572
Marker53760	6	34.572
Marker418230	6	34.572
Marker164510	6	37.108
Marker156050	6	38.36
Marker283403	6	38.36
Marker581640	6	38.36
Marker560747	6	39.612
Marker775980	6	39.763
Marker56194	6	40.864
Marker575915	6	40.864
Marker380836	6	40.864
Marker126088	6	40.864
Marker218599	6	43.4
Marker433736	6	43.4
Marker140966	6	43.4
Marker337267	6	44.652
Marker534903	6	44.652
Marker225349	6	45.904
Marker213281	6	45.904
Marker62010	6	47.768
Marker112551	6	48.44
Marker56966	6	48.44
Marker325616	6	50.976
Marker163425	6	50.976
Marker166986	6	50.976
Marker155846	6	50.976
Marker632750	6	52.229
Marker215493	6	52.229
Marker343758	6	52.229
Marker151420	6	53.481
Marker450836	6	54.733
Marker246954	6	55.985
Marker371717	6	55.985
Marker77749	6	57.237
Marker400178	6	57.237
Marker176375	6	57.237
Marker234128	6	57.241
Marker348495	6	57.241
Marker280859	6	57.241
Marker446060	6	57.241
Marker176499	6	57.241
Marker288214	6	57.241
Marker79004	6	58.489
Marker551723	6	58.489
Marker73774	6	58.489
Marker403560	6	58.489
Marker148075	6	58.489
Marker388529	6	58.489
Marker269450	6	58.489
Marker257982	6	58.489
Marker312180	6	58.489
Marker395212	6	58.489
Marker366479	6	58.489
Marker314283	6	58.489
Marker183425	6	58.489
Marker147306	6	58.489
Marker113439	6	58.489
Marker222563	6	58.489
Marker212820	6	58.489
Marker364485	6	58.489
Marker195256	6	58.489
Marker87591	6	58.489
Marker574822	6	58.489
Marker459403	6	58.489
Marker388241	6	58.489
Marker163551	6	58.489
Marker211226	6	58.489
Marker672191	6	58.489
Marker131979	6	58.489
Marker287329	6	58.489
Marker80304	6	58.489
Marker117565	6	58.489
Marker159592	6	58.489
Marker104866	6	61.596
Marker143014	6	61.596
Marker148219	6	61.596
Marker221967	6	61.596
Marker275450	6	61.596
Marker458236	6	63.131
Marker460288	6	64.665
Marker165908	6	64.665
Marker81641	6	67.772
Marker133281	6	67.772
Marker130791	6	67.772
Marker166947	6	67.772
Marker344505	6	67.772
Marker305977	6	69.177
Marker174069	6	69.177
Marker236919	6	69.177
Marker296627	6	69.177
Marker181325	6	69.177
Marker182136	6	69.177
Marker155313	6	69.177
Marker245655	6	69.177
Marker180634	6	69.177
Marker629315	6	70.582
Marker100994	6	70.582
Marker433250	6	70.582
Marker292712	6	70.582
Marker309671	6	70.582
Marker153649	6	71.987
Marker304214	6	71.987
Marker212868	6	71.987
Marker89416	6	71.987
Marker303460	6	71.987
Marker232712	6	71.987
Marker401132	6	71.987
Marker160188	6	71.987
Marker30780	6	71.987
Marker297011	6	71.987
Marker307547	6	71.987
Marker311709	6	71.987
Marker191345	6	71.987
Marker216324	6	71.987
Marker88680	6	71.987
Marker216840	6	71.987
Marker323671	6	71.987
Marker201936	6	71.987
Marker63832	6	73.392
Marker261131	6	73.392
Marker109215	6	73.392
Marker340799	6	73.392
Marker401151	6	74.797
Marker343066	6	74.797
Marker49920	6	74.797
Marker512997	6	74.797
Marker149504	6	74.797
Marker59000	6	74.797
Marker271015	6	74.797
Marker510416	6	74.797
Marker389978	6	76.202
Marker232955	6	76.202
Marker482235	6	76.202
Marker307836	6	76.202
Marker116146	6	76.202
Marker469167	6	76.202
Marker189966	6	76.202
Marker463065	6	76.202
Marker514830	6	76.202
Marker423990	6	76.202
Marker467688	6	76.202
Marker151614	6	76.202
Marker361931	6	76.202
Marker293162	6	76.202
Marker161508	6	82.045
Marker228668	6	82.045
Marker192531	6	82.045
Marker154220	6	82.045
Marker428305	6	82.045
Marker263581	6	82.045
Marker92379	6	82.045
Marker398402	6	82.045
Marker339151	6	82.045
Marker114559	6	82.045
Marker355482	6	82.045
Marker119772	6	82.67
Marker132654	6	82.67
Marker162391	6	82.67
Marker703294	6	82.67
Marker299592	6	82.67
Marker214089	6	82.67
Marker336071	6	82.67
Marker219810	6	83.295
Marker417987	6	83.295
Marker57371	6	83.295
Marker136697	6	83.295
Marker473161	6	83.295
Marker157921	6	83.92
Marker298029	6	83.92
Marker306823	6	83.92
Marker176347	6	83.92
Marker305614	6	83.92
Marker402565	6	83.92
Marker413207	6	83.92
Marker460951	6	83.92
Marker88742	6	83.92
Marker638102	6	85.453
Marker239825	6	88.559
Marker329347	6	88.559
Marker210994	6	88.559
Marker164264	6	90.092
Marker110937	6	90.092
Marker430312	6	94.811
Marker402369	6	94.811
Marker1022909	6	94.811
Marker425835	6	94.811
Marker300697	6	94.811
Marker641058	6	94.811
Marker438443	6	94.811
Marker572478	6	94.811
Marker520630	6	94.811
Marker50081	6	94.811
Marker79723	6	94.811
Marker271806	6	94.811
Marker547875	6	96.344
Marker108245	6	97.878
Marker271458	6	97.878
Marker339149	6	99.411
Marker404571	6	99.411
Marker38269	6	100.944
Marker143799	6	102.477
Marker91272	6	102.477
Marker178911	6	102.477
Marker441797	6	102.477
Marker58201	6	102.477
Marker192838	6	102.477
Marker179416	6	102.477
Marker121974	6	102.477
Marker210535	6	102.477
Marker334015	6	102.477
Marker262032	6	102.477
Marker27478	6	107.196
Marker60945	6	108.729
Marker404329	6	108.729
Marker341041	6	109.354
Marker149477	6	109.979
Marker37794	6	109.979
Marker276906	6	109.979
Marker124949	6	109.979
Marker438289	6	109.979
Marker494061	6	111.229
Marker454069	6	112.48
Marker315252	6	112.512
Marker99719	6	113.762
Marker251803	6	113.762
Marker299064	6	115.012
Marker385970	6	116.262
Marker464385	6	116.262
Marker407577	6	117.512
Marker131635	6	118.762
Marker124950	6	124.765
Marker763820	6	124.765
Marker422236	6	124.765
Marker564732	6	125.35
Marker266642	6	126.6
Marker429315	6	130.449
Marker357200	6	135.648
Marker258407	6	138.18
Marker126122	6	155.75
Marker10725	6	155.75
Marker294640	6	159.598
Marker319913	6	164.798
Marker415922	7	0
Marker238674	7	0
Marker394414	7	3.848
Marker534767	7	6.38
Marker362007	7	7.63
Marker67729	7	7.63
Marker550340	7	8.88
Marker232688	7	8.88
Marker708476	7	8.88
Marker208473	7	11.77
Marker132652	7	11.77
Marker42916	7	12.709
Marker535429	7	12.709
Marker506904	7	12.709
Marker500194	7	12.709
Marker55545	7	12.709
Marker322521	7	12.709
Marker190622	7	12.709
Marker216134	7	12.709
Marker294404	7	12.709
Marker198482	7	12.709
Marker259959	7	12.709
Marker217202	7	12.709
Marker227089	7	12.709
Marker300863	7	12.709
Marker198023	7	17.019
Marker224690	7	17.019
Marker204590	7	17.019
Marker276022	7	19.856
Marker253082	7	19.856
Marker77739	7	19.856
Marker335966	7	19.856
Marker67737	7	19.856
Marker388037	7	19.949
Marker311195	7	19.949
Marker467682	7	22.692
Marker351142	7	28.517
Marker199054	7	28.517
Marker169185	7	28.517
Marker263019	7	28.517
Marker255792	7	28.517
Marker160268	7	28.517
Marker81892	7	28.517
Marker305063	7	28.517
Marker200072	7	28.517
Marker282537	7	28.517
Marker662543	7	28.517
Marker85387	7	31.331
Marker261975	7	31.331
Marker510600	7	31.331
Marker25012	7	43.512
Marker484413	7	45.488
Marker351408	7	45.488
Marker64250	7	45.488
Marker193620	7	45.488
Marker218626	7	45.488
Marker287530	7	45.488
Marker149894	7	45.488
Marker211543	7	45.488
Marker169585	7	45.488
Marker436962	7	45.488
Marker311822	7	45.488
Marker186020	7	45.488
Marker238490	7	46.754
Marker221724	7	46.754
Marker56861	7	46.754
Marker325420	7	46.754
Marker408212	7	46.754
Marker190799	7	46.754
Marker710604	7	49.563
Marker473741	7	50.098
Marker154261	7	50.098
Marker406115	7	55.253
Marker163849	7	55.253
Marker84218	7	55.253
Marker115340	7	55.253
Marker331215	7	55.253
Marker143080	7	56.163
Marker235217	7	56.163
Marker398311	7	56.163
Marker338002	7	57.253
Marker268767	7	59.253
Marker307551	7	61.252
Marker255674	7	61.252
Marker238069	7	63.064
Marker203378	7	63.064
Marker178885	7	63.064
Marker235412	7	63.252
Marker104702	7	63.252
Marker368789	7	63.252
Marker126872	7	63.252
Marker301548	7	63.252
Marker214837	7	65.252
Marker396513	7	65.252
Marker312753	7	65.252
Marker371394	7	65.252
Marker454584	7	69.302
Marker185937	7	69.302
Marker335078	7	69.302
Marker472165	7	69.302
Marker156080	7	69.302
Marker552244	7	69.302
Marker673176	7	73.353
Marker344572	7	73.353
Marker223860	7	73.353
Marker210545	7	73.353
Marker429484	7	73.353
Marker460511	7	73.353
Marker323689	7	73.353
Marker243173	7	79.888
Marker233805	7	79.888
Marker149096	7	79.888
Marker213373	7	79.888
Marker226798	7	81.67
Marker171233	7	81.67
Marker449445	7	81.67
Marker243035	7	81.67
Marker431723	7	83.67
Marker251284	7	83.67
Marker141742	7	83.67
Marker413391	7	83.67
Marker227142	7	83.67
Marker471421	7	83.67
Marker282732	7	83.67
Marker361262	7	83.67
Marker164259	7	83.67
Marker194364	7	83.67
Marker368921	7	85.313
Marker143755	7	86.956
Marker318695	7	86.956
Marker153106	7	86.956
Marker382511	7	86.956
Marker204975	7	86.956
Marker309593	7	88.599
Marker545040	7	88.599
Marker413841	7	88.599
Marker199296	7	90.139
Marker333206	7	90.139
Marker149502	7	90.139
Marker151944	7	90.139
Marker471112	7	90.139
Marker297756	7	90.139
Marker164272	7	90.243
Marker297001	7	90.243
Marker269272	7	93.571
Marker66868	7	93.571
Marker537281	7	93.571
Marker168576	7	93.571
Marker330639	7	102.232
Marker301127	7	102.232
Marker304593	7	102.232
Marker249625	7	102.232
Marker94524	7	102.232
Marker507648	7	102.232
Marker358820	7	102.232
Marker490158	7	102.232
Marker296427	7	103.875
Marker621241	7	103.875
Marker206730	7	103.875
Marker323168	7	103.875
Marker131882	7	105.518
Marker289004	7	105.518
Marker541291	7	105.518
Marker318319	7	105.518
Marker30287	7	105.518
Marker353993	7	105.518
Marker344878	7	105.518
Marker382722	7	107.161
Marker270564	7	107.161
Marker550546	7	107.161
Marker384840	7	107.161
Marker364017	7	108.804
Marker14888	7	108.804
Marker102748	7	108.804
Marker516971	7	108.804
Marker195862	7	108.804
Marker237593	7	108.804
Marker338315	7	108.804
Marker205676	7	108.804
Marker41374	7	108.804
Marker398793	7	108.804
Marker418689	7	108.804
Marker370007	7	108.804
Marker49365	7	108.804
Marker316565	7	108.804
Marker185285	7	108.804
Marker458327	7	108.804
Marker183955	7	108.804
Marker235173	7	110.729
Marker203607	7	111.354
Marker204539	7	111.354
Marker39760	7	111.354
Marker199308	7	111.354
Marker291305	7	111.354
Marker262455	7	111.354
Marker355488	7	111.354
Marker333674	7	111.354
Marker616235	7	111.354
Marker249296	7	111.354
Marker286215	7	111.354
Marker300115	7	117.942
Marker254173	7	117.942
Marker470731	7	117.942
Marker472262	7	117.942
Marker315101	7	117.942
Marker549846	7	117.942
Marker301742	7	117.942
Marker119716	7	123.919
Marker96837	7	123.919
Marker458525	7	123.919
Marker268144	7	123.919
Marker218111	7	126.451
Marker245399	7	126.451
Marker182318	7	126.451
Marker118780	7	126.451
Marker448720	7	126.451
Marker290446	7	126.451
Marker363911	7	126.451
Marker189227	7	132.121
Marker235096	7	132.121
Marker202258	7	132.121
Marker139011	7	132.121
Marker347192	7	133.371
Marker242553	7	133.371
Marker550971	7	133.371
Marker457810	7	133.371
Marker137575	7	142.297
Marker217865	7	142.297
Marker290145	7	142.297
Marker121277	7	142.297
Marker530342	7	142.297
Marker229085	7	142.297
Marker302458	7	142.297
Marker340129	7	142.297
Marker390912	7	152.727
Marker365621	7	152.727
Marker164437	7	152.727
Marker405809	7	155.259
Marker546146	7	155.259
Marker711541	7	155.259
Marker319467	7	156.509
Marker322662	7	156.509
Marker136695	7	156.509
Marker227980	8	0
Marker483614	8	0
Marker133669	8	1.25
Marker456574	8	3.782
Marker55664	8	3.782
Marker147850	8	3.782
Marker111529	8	3.782
Marker217448	8	3.782
Marker308552	8	3.782
Marker437986	8	7.649
Marker386817	8	12.874
Marker265501	8	15.419
Marker207506	8	15.419
Marker294974	8	19.286
Marker172270	8	21.831
Marker246577	8	25.698
Marker209268	8	26.954
Marker109982	8	26.954
Marker170605	8	28.21
Marker538027	8	28.21
Marker225774	8	28.791
Marker331062	8	29.466
Marker93386	8	29.466
Marker447558	8	32.011
Marker313170	8	32.011
Marker133619	8	33.267
Marker134770	8	33.267
Marker228811	8	33.267
Marker300468	8	35.812
Marker133261	8	35.812
Marker339610	8	41.037
Marker198070	8	41.037
Marker243976	8	41.037
Marker275586	8	41.037
Marker61870	8	41.037
Marker603707	8	41.037
Marker284645	8	42.293
Marker190424	8	47.519
Marker115236	8	47.519
Marker499388	8	47.519
Marker87790	8	48.775
Marker19065	8	48.775
Marker386600	8	48.775
Marker427895	8	48.775
Marker504072	8	48.775
Marker207631	8	48.775
Marker465403	8	48.775
Marker213485	8	48.775
Marker79265	8	48.775
Marker346472	8	48.775
Marker199257	8	48.775
Marker191259	8	48.775
Marker177555	8	50.031
Marker351617	8	50.031
Marker170601	8	51.287
Marker154065	8	52.543
Marker359969	8	52.543
Marker155019	8	52.543
Marker336641	8	52.543
Marker215534	8	52.543
Marker150700	8	52.543
Marker112192	8	52.543
Marker93163	8	52.543
Marker38202	8	52.543
Marker391901	8	52.543
Marker105659	8	52.543
Marker327821	8	52.543
Marker283098	8	53.8
Marker358814	8	53.8
Marker20372	8	53.8
Marker359756	8	53.8
Marker369095	8	53.8
Marker55543	8	53.8
Marker219028	8	53.8
Marker474627	8	53.8
Marker203711	8	53.8
Marker404533	8	53.8
Marker218040	8	53.8
Marker295056	8	53.8
Marker313521	8	53.8
Marker202500	8	53.8
Marker190975	8	53.8
Marker202978	8	55.122
Marker597018	8	55.122
Marker120001	8	56.445
Marker121180	8	56.445
Marker358163	8	56.445
Marker125554	8	56.445
Marker150817	8	57.768
Marker35736	8	57.768
Marker100815	8	57.768
Marker345837	8	59.091
Marker107198	8	59.091
Marker730000	8	59.091
Marker152820	8	59.091
Marker358907	8	59.091
Marker617367	8	59.091
Marker359617	8	59.091
Marker214038	8	61.77
Marker245676	8	61.77
Marker369255	8	61.77
Marker177870	8	61.77
Marker167596	8	61.77
Marker549807	8	64.23
Marker168788	8	64.23
Marker230230	8	64.23
Marker465923	8	64.23
Marker552077	8	64.23
Marker275715	8	64.23
Marker656242	8	76.773
Marker210950	8	76.773
Marker170165	8	76.773
Marker181132	8	76.773
Marker390945	8	76.773
Marker193623	8	76.773
Marker380671	8	85.256
Marker199251	8	85.256
Marker434698	8	85.256
Marker233101	8	85.256
Marker173248	8	86.579
Marker324794	8	86.579
Marker114024	8	90.651
Marker683508	8	90.651
Marker397352	8	90.651
Marker224273	8	91.973
Marker60944	8	93.296
Marker478717	8	93.296
Marker169536	8	93.296
Marker233096	8	93.296
Marker347680	8	93.296
Marker474818	8	93.296
Marker753660	8	93.296
Marker58354	8	93.296
Marker151533	8	93.296
Marker29365	8	94.619
Marker167205	8	94.619
Marker672558	8	94.619
Marker655553	8	94.619
Marker65943	8	94.619
Marker359019	8	94.619
Marker146284	8	94.619
Marker234989	8	94.619
Marker400058	8	94.619
Marker223897	8	94.619
Marker77128	8	94.619
Marker437575	8	94.619
Marker244749	8	94.619
Marker319212	8	94.619
Marker269025	8	94.619
Marker406956	8	94.619
Marker248801	8	94.619
Marker209776	8	95.942
Marker389513	8	95.942
Marker636415	8	95.942
Marker392994	8	97.264
Marker86014	8	97.264
Marker333099	8	97.264
Marker277972	8	97.264
Marker428825	8	98.587
Marker476394	8	98.587
Marker269819	8	99.91
Marker110909	8	99.91
Marker297060	8	99.91
Marker203606	8	99.91
Marker170970	8	99.91
Marker237187	8	99.91
Marker333347	8	99.91
Marker159590	8	99.91
Marker205786	8	99.91
Marker356600	8	99.91
Marker151321	8	99.91
Marker318164	8	99.91
Marker79196	8	99.91
Marker110800	8	99.91
Marker43331	8	102.589
Marker419998	8	102.589
Marker122273	8	102.589
Marker250348	8	102.589
Marker297048	8	102.589
[truncated: 574 more rows]
