# Supplementary material
Source: MDPI journal article supplement (https://www.mdpi.com/1999-4907/14/8/1591)
Supplement: s1 [file s1 › File S4 Sequences containing SNPs. SNP loci are all in lowercase.xlsx]

## Sheet: LG1
>Marker33787
GGACTTGCTGTCATTGTATTCCATTGAAATGATGGCTCACGGCTAGCATAATTGTAACTAGAACATCTAACAAGAATCTCATTTCTTTATGTTTTGTTGGXXXXXXXXXXAATTCAAACTATAATATATGACAAAAAATCTCTATTTCATTATGACTTGATGGATGATCATATCTTGCTGCAAATCCCCCATTTTGGCATACATTGTGAG
GGACTTGCCGTCATTGTATTCCATTGAAATGATGGCTCACAGCTAGCATAATTGTAACTAGAACATCTAACAAGAATCTCATTTCTTTATGTTTTGTTGGXXXXXXXXXXAATTCAAACTATAATATATGACAAAAAATCTCTATTTCATTATGACTTGATGGATGATCATATCTTGCTGCAAATCCCCCATTTTGGCATACATTGTGAG
* *
>Marker51924
CTTTGCCAAGAGGAAGGGTCAGTATGGAGCATGCGAAAAGATATTTTGGCCCTTACAAAAGAAATCCAAACCATCTATGATCAAAAGGAAGATATGGCAAXXXXXXXXXXGGGAAAGAATGTGCCAACTTCTTGCAATGATAGGCAACGAAAGTGTATACTTCTTTATTTGATAAGCCTAATTCTTGCATAAATGAACATAAAACACAAT
CTTTGCCAAGAGGAAGGGTTAGTATGGAGCATGCGAAAAGATATTTTGGCCCTTACAAAAGAAATCCAAACCATCTATGATCAAAAGGAAGATATGGCAAXXXXXXXXXXGGGAAAGAATGTGCCAACTTCTTGCAATGATAGGCAACGAAAGTGTATACTTCTTTATTTGATAAGCCTAATTCTTGCATAAATGAACATAAAACACAAT
*
>Marker38722
CCTTTATTCTTTTAACAGAGAATACAATCTTGGGTTAGTCACCCCGTGGTTTTTCCCTTAATAGGGTTTCCACGTAAAAAGCCTTGTGTTATGTGTATTGXXXXXXXXXXGTGACTGATTAGCTTTTCCCACTGAGGCTATACATCCAGTCCTCAAAATAACCTGCATTTGGTCTTCCCCTCATCTGACTAAGCATAACCATCATGTATT
CCTTTATTCTTTTAACAGAGAATACAATCTTGGGTTAGTCACCCCGTGGTTTTTCCCTTAATAGGGTTTCCACGTAAAAAGCCTTGTGTTATGTGTATTGXXXXXXXXXXATGACTGATTAGCTTTTCCCACTGAGGCTATACATCCAGTCCTCAAAATAACCTGCATTTGGTCTTCCCCTCATCTGACTAAGCATAACCATCATGTATT
*
>Marker92036
TTCATTGTGTATTGTTCCTTTATTTACATTCCATATTTCTGCATCTACAGTTACAATGAATGTAATGTTGCAAAATACTTCATATACATTTAGTGTAAGGXXXXXXXXXXTCTATAATAACCTATCTCAATTTTTGTCAGCTCCAAATTATTTGACTATGGTGGAAACGAATGTAACATTGCAAAATGCTTCATTTGTGTTTATTATAAG
TTCATTGTGTATTGTTCCTTTATTTACATTCCATATTTCTGCATCTACAGTTACAATGAATGTAATGTTGCAAAATACTTCATATACATTTAGTGTAAGGXXXXXXXXXXTCTATAATAACCTATCTCAATTTTGGTCAGCTCCAAATTATTTGACTATGGTGGAAACGAATGTAACATTGCAAAATACTTCATTTGTGTTTATTATAAG
* *
>Marker110655
CCTAATGATGCAAGATCAAACCTGTGAAGTATAAAACCATTCTCTGCATCTGCAAGACACATATGATGTGATCATCACAAGACATTAAGGATTTCAAACAXXXXXXXXXXATAGGATACATTTGACACCAATGAAAACAATGATATGTTGACATCAATGACAACATCGATTAGGCACATACTTGTAACACTTTTATAAACACAAGAACAT
CCTAATGATGCAAGATCAAACCTGTGAAGTATAAAACCATTCTCTGCATCTGCAAGACACATATGATGTGATCATCACAAGACATTAAGGATTTCAAACAXXXXXXXXXXATAGGATACATTTGACACCAATGAAAACAATGATATGTTGACATCAATGACAACATCAATTAGGCACATACTTGTAACACTTTTATAAACACAAGAACAT
*
>Marker90084
ACAATTGCAACAAGTTTGGACATGTTGCAAGATTTTACAGAAGCAAGAATGTGAAAAGAAATTACTATGCTAAAGAAAGGAAAACAGAGAAGAGGAATGAXXXXXXXXXXGTCAGGACTAAGACTGTATTTGAGAAGGATAAAAGAAGAATTGTGGAAAAAGGTTCAGGTTCATTGTT-CCTGCACAGAGCAAGTCTTCATGATGATTGAT
ACAATTGCAACAAGTTTGGACATGTTGCAAGATTTTGCAGAAGCAAGAATGTGAAAAGAAATTACTATGCTAAAGAAAGGAAAACAGAGAAGAGGAATGAXXXXXXXXXX-TCAGGACTAAGACTGTATTTGAGAAGGATAAAAGAAGAATTGCGGAAAAAGGTTCAGGTTCATTGTTCCCTACACAGAGCAAGTCTTCATGATGATTGAT
* * *
>Marker67682
TTGTGTAACCTAATGATAACCTATCATGGATTGATACTCTTTCTCTTTTGTCACCTTACTAGCTAAGGTCTTATCTAGTATCCTATCCATAGTGTTAGCCXXXXXXXXXXTAGGGTCCATGTTTACCAGGCATGCAAGCACAAAGTAAGGCCCAATTCCAAAGATAAAATCTTGATGCACGACATCAACCTATCCAAAGAAAAGAAAACA
TTGTGTAACCTAATGATAACCTATCATGGATTGATACTCTTTCTCTTTTGTCACCTTACTAGCTAAGGTCTTATCTAGTATCCTATCCATAGTGTTAGCCXXXXXXXXXXTAGGGTCCATGTTTGCCAGGCATGCAAGCACAAAGTAAGGCCCAATTCCAAAGATAAAATCTTGATGCACGACATCAACCTATCCAAAGAAAAGAAAACA
*
>Marker281708
GAATGTATATAAGGGTAATTATAAATGTAGTAATGGAAAAGTGGAACATGAAGGGGCATGCAAATCCAACAATAATACTATTAGGTTAATGAATTATCATXXXXXXXXXXCATGTAACTTTGGCAAATTACATATCTAAGCAATATTGTGATCAATGGGGTTGCCTCTTAGTGCTTGTGTTGCATTTGTATAGGAAACAAGGTATAATAG
GAATGTATATAAGGGTAATTATAAATGTAGTAATGGAAAAGTGGAACATGAAGGGGCATGCAGATCCAACAATAATACTATTAGGTCAATGAATTATCATXXXXXXXXXXCATGTAACTTTGGCAAATTACATATCTAAGCAATATTGTGATCAATGGGGTTGCCTCTTAGTGCTTGTGTTGCATTTGTATAGGAAACAAGGTATAATAG
* *
>Marker17195
AATGCACTAAGACAGAGGTCAAAAGTGCAGGAATACAGAGTATATGCATAAAACTAGCAGATGCATTGTATCAGAGGTTATATGTGGCGAAGTAGAGCCTXXXXXXXXXXCAAACAAAAGATGAAAACTTTGTAAACCTCAATATTTCATAGCTTCCATTGGTTGCCTATCCCAATCAATCTTGCATGTATGAATAAGGCCCTCAGAGAG
AATGCACTAAGACAGAGGTCAAAAGTGCAGGAATACAGAGTATATGCATAAAACTAGCAGATGCATCGTATCAGAGGTTATATGTGGCGAAGTAGAGCCTXXXXXXXXXXCAAACAAAAGATGAAAACTTTGTAAACCTCAATATTTCATAGCTTCCATTGGTTGCCTATCCCAATCAATCTTGCATGTATGAATAAGGCCCTCAGAGAG
*
>Marker236364
GTATTTTACAACAGATAAAGATATGGCCTCATGGCTTGGAGGATAGCTAGAGACATCTATGAGGTATGCATGATCCAAGTTTCAGAGCATAAAAGTTACCXXXXXXXXXXTTTCTCTATTGGCTGACATTAAAAAAACCATATTTTGGTAACCAACATAAGGCTTGATAAAAGTGGCTAAGCGTTAGGGTTTTCGTTGATATTGTATTGT
GTATTTTACAACAGATAAAGATATGGCCTCATGGCTTGGAGGATAGCTAGAGACATCTATGAGGTATGCATGATCCAAGTTTCAGAGCATAAAAGTTACCXXXXXXXXXXTTTCTCTATTGGCTGACATTAAAAAAACCCTATTTTGGTAACCAACATAAGGCTTGATAAAAGTGGCTAAGCATTAGGGTTTTCGTTGATATTGTATTGT
* *
>Marker83845
AATGTTCTCTTTTACTAAGTTGAAATTGTGCAAGATAAGGAAAAATTTCAGCTTACTAGAAGGGGACATTACATTTTCATCATTGATTTATTTAGTTTTTXXXXXXXXXXTTGGGTGCTCGCTCTAGTGTCCTCTGCATCTGAATTTCAGGAAACAGAAGTTACAGGGCTGATCAGTGTCAGAAGGATGTCCAGATTCTGCGACGAAACT
AATGTTCTCTTTTACTAAGTTGAAATTGTGCAAGGTAAGGAAAAATTTCAGCTTACTAGAAGGGGACATTACATTTTCATCATTGATTTATTTAGTTTTTXXXXXXXXXXTTGGGTGCTCGCTCTAGTGTCCTCTGCATCTGAATTTCAGGAAACAGAAGTTACAGGGCTGATCAGTGTCAGAAGGATGTCCAGATTCTGCGACGAAACT
*
>Marker28115
GATAATAAAGTTTTGCTTGTTCTTACACTTGCTTGAACTTAGGATCTTCAAAACATCAATATCGATAATGAAGTTTTGCTTGTTTCAACACTTGCAAAGAXXXXXXXXXXATTTTGCAAATTCTAGAACTGTGCATGAACTTGGATCAATCTTGCATCTATGATTGCGACCCAAATGGTGTGGCCTTGAACTTAGGATCTTCAAAACATC
GATAATAAAGTTTTGCTTGTTCTTACACTTGCTTGAACTTAGGATCTTCAAAACATCAATATCAATAATGAAGTTTTGCTTGTTTCAACACTTGCAAAGAXXXXXXXXXXATTTTGCAAATTCTAGAACTGTGCATGAACTTGGATCAATCTTTCATCTATGATTGTGACCCAAATGGTGTGGCCTTGAACTTAGGATCTTCAAAACATC
* * *
>Marker235776
GAGCATGTGACAAGAGCAGAAGAAGAGAGACCTTGCTTAATGTAAAAGCAGAGCAGTGAAACATAGTAGTTAAGATGAAGAATTTTGAGATAGTATTTTGXXXXXXXXXXTCATGTGTGATAGATTGTGATTGTTTCTTCTAAGCTTATTTTGCTTTGTTTTTGCATGTGGTAAATGGATTACTAGTTTAATAAGGAAAAATTTTATTAG
GAGCATGTGACAAGAGCAGAAGAAGAGAGACCTTGCTTAATGTAAAAGCAGAGCAGTGAAACATAGTAGTTAAGATGAAGAATTTTGAGATAGTATTTTGXXXXXXXXXXTCATGTGTGATAGATTGTGATTGTTTCTTCTAAGCTTATTTTGCTTTGTTTTTGCATGTGGTAAATGGATTACTAGTTTAATAAGGAAAAAGTTTATTAG
*
>Marker68954
ACAATCTCATAGCATGCCCTAATAGTCCTTGTGGGTGAGCAGGAGCCAAATGAGTCAATTGTTCATTTACCAATTTCCCGCAATAGTTTCAAGGCAGTCTXXXXXXXXXXCTGTGGCCCCACAGTGGTCTCAAAATTGATTGTCAAGCTTGCAGTATGAAGTTTGATGTAACACATAATGGACACCGTGGTCCCATGGTGGCTTCAAAGT
ACAATCTCGTAGCATGCCCTAATAGTCCTTGTGGGTGAGCAGGAGCCAAATGAGTCAATTGTTCATTTACCAATTTCCCGCAGTAGTTTCAAGGCAGTCTXXXXXXXXXXCTGTGGCCCCATAGTGGTCTCAAAATTGATTGTCAAGCTTGCAGTATGAAGTTTGATGTAACACATAATGGACACTGTGGTCCCATGGTGGCTTCAAAGT
* * * *
>Marker126954
ATTGCTTCATCCTCTTCTGTATATGGTCTTCTATCACCACATTGATATCTTCCTCTTGGGAATATTCCTCCTCTTCCTCTTTGTTGATTTTGTCTAATCTXXXXXXXXXXTTGCAATTCTACACCGAACATATTCAGCCGATCATTCATCACAGATGGGAGAAGCTCAACACTCCCTTGCACATGGTTGCCTATGCATTGAACCCAAAGT
ATTGCTTCATCCTCTTCTATATATGGTCTTCTATCACCACATTGATATCTTCCTCTTGGGAATATTCCTCCTCTTCCTCTTTGTTGATTTTGTCTAATCTXXXXXXXXXXTTGCAATTCTACACCGAACATATTCAGCCGATCATTCATCACAGATGGGAGAAGCTCAACACTCCCTTGCACATGGTTGCCTATGCATTGAACCCAAAGT
*
>Marker333111
ATCTTTATCATGAACGGACACCAGATGCTGACAACTACTCATAAGTCACCACATTTTGATTTAACACAATGATGGATTGAACCACAAGAGCCTGTGACTCXXXXXXXXXXACAACCAATCCAAAACCAAAACCAACAGTTATCAGCAGTCCAGAGCCAAATTCACATTTACTTATGCATCTCAGAAGACCTTGCACCTACAGGAAACCCT
ATCTTTATCATGAACGGACACCAGATGCTGACAACTACTCATAAGTCACAACATTTTGATTTAACACAATGATGGATTGAACCACAAGAGCCTGTGACTCXXXXXXXXXXACAACCAATCAAAAACCAAAACCAACAGTTATCAGCAGTCCAGAGCCAAATTCACATTTACTTATGCATCTCAGAAGACCTTGCACCTACAGGAAACCCT
* *
>Marker76041
AAAAGATATATATTGCCACTCATTTTAGAAAACCACATATATGATACTAAATGTTAACCAAATAGATGTTAACAAAAATAAAGTTATCATTTGGTGGCATXXXXXXXXXXCATGATAAATTTAATTAATAATAATTAAAATCAGCAAACCATTATAACACAAAGTTAAATATTCAGACACCATTATAACATAAATTGACCAGAAAAAGAG
AAAAGATATATATTGCCACTCATTTTAGAAAACCACATATATGATACTAAATGTTAACCAAATAGATGTTAACAAAAATAAAGTTATCATTTGGTGGCATXXXXXXXXXXCATGATAAATTTAATTAGTAATAATTAAAATCAGCAAACCATTATAACACAAAGTTAAATATTCAGACACCATTATAACATAAATTGACCAGAAAAAGAG
AAAAGATATATATTGCAACTCATTTTAGAAAACCACATATATGATACTAAATGTTAACCAAATAGATGTTATCAAAAATAAAGTTATCATTTGGTGGCATXXXXXXXXXXCATGATAAATTTAATTAATAATAATTAAAATCAGCAAACCATTATAACACAAAATTAAATATTCAGACACCATTATAACATAAATTGACCAGAAAAAGAG
* * * *
>Marker137945
TTGTTCTTGGAAAATTGAAACTTAATATATCAGTTGGCTCTAAGTTCCTTAATTTTTTGAACCCTTACAAACTATATTTCTTTTTCAAGCATATATTGTGXXXXXXXXXXACCTTTGTTGATTTGTTTTCTTCTTGTAACTTAACAACCGGTGTTTTGTCCTTTCCAACAAATGGAACCGACGCTAACTCCAAACACAATACAAATGATG
TTGTTCTTGGAAAATTGAAACTTAATATATCAGTTGGCTCTAAGTTCCTTAATTTTTTGAACCCTTACAAACTATATTTCTTTTTCAAGCATATATTGTGXXXXXXXXXXACCTTTGTTGATTTGTTTTCTTCTTGTAACTTAACAACCGGTGTTTTGTCCTTTCCAACAAATGGAACCGATGCTAACTCCAAACACAATACAAATGATG
*
>Marker111484
TTTCTAGAGAAGCCAATGCTTCATGGCTTCTAAAGCTTTCCAAATTCTTTTAATAACAAATTTGAACCCTTGGATCTAAATGATGTCTTTCATAATGAGAXXXXXXXXXXTGTGAGTCTCAAAAGAGGCCCAAAGAAAGTCCCTAGAAAGCTTTTCAAGCTTTTGATAGGAGGATTTAGAAGGGACCCAACAAGAGGAATAATAAACATG
TTTCTAGAGAAGCCAATGCTTCATGGCTTCTAAAGCTTTCCAAATTCTTTTAATAACAAATTTGAACCCTTGGATCTAAATGATGTCTTTCATAATGAGAXXXXXXXXXXTGTGAGTCTCAAAAGAGGCCCAAAGAAAGTCCCTAGAAAGCTTTTCAAGCTTCTGATAGGAGGATTTAGAAGGGACCCAACAAGAGGAATAATAAACATG
TTTCTAGAGAAGCCAATGCTTCATGGCTTCTGAAGCTTTCCAAATTCTTTTAATAACAAATTTGAACCCTTGGATCTAAATGATGTCTTTCATAATGAGAXXXXXXXXXXTGTGAGTCTCAAAAGAGGCCCAAAGAAAGTCCCTAGAAAGCTTTTCAAGCTTCTGATAGGAGGATTTAGAAGGGACCCAACAAGAGGAATAATAAACATG
* *
>Marker233375
GTCTTTTAGATGATTTCGCTGCAACAAGCTTGGGTATAAGATTGCAAAGTGCTCATCTCAAAATTCTTTGCGATCGTATTGAGTTAAAGGTTCCAAAAATXXXXXXXXXXATAGTAGTTGATCAATTGATGGAGGACGATGCATTGGAGTCACAGCTTTTTAAAGGATTTAGTTTCTCAAGATTTTAAAGAGGGCAAGGACAAATTATTG
GTCTTTTAGATGATTTCGCTGCAACAAGCTTGGGTATAAGATTGCAAAGTGCTCATCTCAAAATTCTTTGCGATCATATTGAGTTAAAGGTTCCAAAAATXXXXXXXXXXATAGTAGTTGATCAATTGATGGAGGACGATGCATTGGAGTCACAGCTTTTTAAAGGATTTAGTTTCTCAAGATTTTAAAGAGGGCAAGGACAAATTATTG
*
>Marker309219
AACAACCTTAGTCTTCTTCTTAGAGATCACCTCCTGAAACCTGTCCGTATGACCTGCACACACAAAAAGAGGGAAAAGGTTGGGTGCTATTTAGGAGCTTXXXXXXXXXXAGTTCTCTAAATATTTGTTGCATTTAAGTGGATACATTATTTAGGCACTTCTTTTGCACATACTACACATCCTACATTTGCAAGACTTTTAGTTGTCGGG
AACAACCTTAGTCTTCTTCTCAGAGATCACCTCCTGAAACCTGTCCGTATGACCTGCACACACAAAAAGAGGGAAAAGGTTGGGTGCTATTTAGGAGCTTXXXXXXXXXXAGTTCTCTAAATATTTGTTGCATTTAAGTGGATACATTATTTAGGCACTTCTTTTGCACATACTACACATCCTACATTTGCAAGACTTTTAGTTGTCGGG
*
>Marker150860
CATTGTAAACTTCTTACCTACCTATATTTCCTATAACTCCATAGTTGTCTCATTTACGAGACTATGAAATTCATTTACATCTCCACACATTTCATGTAAAXXXXXXXXXXCCACTGTTTGCATGCATTTCAAACTACATCCATGCTTCCAAATCATACAACCCCATGCTATTCCATATCTCATGGACTTGTTTCATCTCTTTAAAACATG
CATTGTAAACTTCATACCTACCTATATTTCCTATAACTCCATAGTTGTCTCATTTACGAGACTATGAAATTCATTTACATCTCCACACATTTCATGTAAAXXXXXXXXXXCCACTATTTGCATGCATTTCAAACTACATCCATGCTTCCAAATCATACAACCCCATGCTATTCCATATCTCATGGACTTGTTTCATCTCTTTAAAACATG
* *
>Marker214270
TCTCTGACTTACCATCTACTCCAATTTTTTTATTGAATACCTACTTGCAACCAATGTGTTTCCTTTTCTTGGGAAAACTCACAAGATCCTAGGTGTCACAXXXXXXXXXXGGAGAGGATAGGGAGATTCCTCCTAAGGAGGAGGCTGCCATACCTCCTGTTTGTGACCATGCACTAGATGACCCCTCTTGGGAAGAGGGTGACCATTGTA
TCTCTAACTTACCATCTACTCCAATTTTTTTATTGAATACCTACTTGCAACCAATGTGTTTCCTTTTCTTGGGAAAACTCACAAGATCCTAGGTGTCACAXXXXXXXXXXGGAGAGGATAGGGAGATTCCTCCTAAGGAGGAGGCTACCATACCTCCTGTTTGTGACCATGCACTAGATGACCCCTCTTGGGAAGAGGGTGACCATCGTA
* * *
>Marker48346
AAAACTTTGATACTTATGTGTTGTCTTTGGGATTTGTGAGATCAAAGTCTGATCATTGTGTTTACTTTAAAACTGAGAATGGCAATCTTCTTATTATTGAXXXXXXXXXXATGTTGCAGGGAATGAAACTTTCTATTGAAGATTGTCCAAAATCTCTTGCTAAGATGGAGGACATGAACAGGGTGCCTTATGCAAGTGCCAAGCAGTGGG
AAAACTTTGATACTTATGTGTTGTCTTTGGGGTTTGTGAGATCAAAGGCTGATCATTGTGTTTACTTTAAAACTGAGAATGGCAATCTTCTTATTATTGAXXXXXXXXXXATGTTGCAGAGAATGAAACTTTCTATTGAAGATTGTCCAAAATCTCTTGCTAAGATGGAGGACATGAACAGGGTGCCTTATGCAAGTGCCAAGCAGTGGG
* * *
>Marker154801
ATAATTTATTACAAGGTTATATATTTATGCAATTTCTTAGTCTTTTCCTACCCAACTCACATGTCAAACTCACAACTCATGCAAGTGGAATTTGAACAATXXXXXXXXXXACTGAAACATATAATAATTGAGTAGATTAAATGCATGTTTAGTAAACATATAATAAGTTTTTATGTCATGTTATTTGAAGACATTCATTGTGCACATAAA
ATAATTTATTACAAGGTTATATATTTATGCAATTTCTTAGTCTTTTCCTACCCAACTCACATGTCAAACTCACAACTCATGCAAGTGGAATTTGAACAATXXXXXXXXXXACTGAAACATATAATAATTGAGTAGATTAAATGCATGTTTAGTAAGCATATAATAAGTTTTTATGTCATGTTATTTGAAGACATTCATTGTGCACATAAA
*
>Marker238503
CACTTTAACAATCAAGACATTCCTTTTTTCTTCATTTTGTCCTATGTTGACTGATGAATATTCTCCTCCATTTGCTTTAGGGAGATCCTTCTATTGTAGCXXXXXXXXXXTAAGTTCCAAGGACACTTGGCAAATCTATAATCACAAAGGTTGTTAGATAGTTAGAGGTTGTTAGGTGATTGTGATCTCCCAGCCACTTGGAGTCAATTC
CACTTTAACAATCAAGACATTCCTTTTTTCTTCATTTTGTCCTATGTTGACTGATGAATATTCTCCTCCATTTGCTTTAGGGAGATCCTTCTATTGTAGCXXXXXXXXXXTAAGTTCCAAGGACACTTGGCAAATCTATAATCACAAAGGTTGTTAGATAGTTAGAGGTTGTTAGGCGATTGTGATCTCCCAGCCACTTGGAGTCAATTC
*
>Marker64943
TGCGACTATACATGAGGCTATATATGTCCCTACACTACTAACTGTGCCTGCTGGGCGAGAGCTCTATCAACCCATTGTCTCACCCTCCTACCATCCCCATXXXXXXXXXXCTACAAAAACTCTGCTCATAAGATGCACCAAGACCCCATCAAGGATGCTCCTTGTATATCCTAGAAAAGATGGCATTCCCCTGGATCATGCCAAGCTGTC
TGCGACTATACATGAGGCTATATATGTCCCTACACTACTAACTGTGCCTGCTAGGCGAGAGCTCTATCAACCCATTGTCTCACCCTCCTACCATCCCCATXXXXXXXXXXCTACAAAAACTCTGCTCATAAGATGCACCAAGACCCCATCAAGGATGCTCCTTGTATATCCTAGAAAAGATGGCATTCCCCTGGATCATGCCAAGCTGTC
*
>Marker204198
CATTACTAGACATTATTCCTTTGCTCTCCTTCCTCATTTATATTTCTCTCTTCTCGTTTTCTTGTCATCCATAGTCAGCCACAACTTTTCCTCATGTTCAXXXXXXXXXXTCATCTTCTTGAGCTGATGCCTTGCTGCCTCTGCACTTGGCCTATCTCCTTGTCTCCTCATATCTTCCATCCTTGATGCTATTTTGTTGTCATATAGTTT
CATTACTAGACATTATTCCTTTGCTCTCCTTCCTCATTTATATTTCTCTCTTCTCGTTTTCTTGTCATCCATAGTCAGCCACAACTTTTCCTCATGTTCAXXXXXXXXXXTCATCTTCTTGAGTTGATGCCTTGCTGCCTCTGCACTTGGCCTATCTCCTTGTCTCCTCATATCTTCCATCCTTGATGCTATTTTGTTGTCATACAGTTT
* *
>Marker86390
ACTCTATCAGAGTTATTTCCATTCCAGTGGACCCAACATCAAGTGTTCCCTGATGTCTTACATCCTGCCACCATTGACATTTACATTCCATGCCCACTACXXXXXXXXXXCTCTATCCTTGATCTTCACAAGATCGATGGACCTTGCCTTTGGTGAGTTGCGCTAGGATCCTCCCTTAGTTGCTGATCCTTCGCATGGCGAACTAGGTGT
ACTCTATCAGAGTTATTTCCATTCCAGCGGACCCAACATCAAGTGTTCCCTGATGTCTTACATCCTGCCACCATTGACATTTACATTCCATGCCCACTACXXXXXXXXXXCTCTATCCTTGATCTTCACAAGATCGATGGACCTTGCCTTTGGTGAGTTGTGCTAGGATCCTCCCTTAGTTGCAAATTCTTCGCATGGCGAACTAGGTGT
* * ** *
>Marker41249
ATCCTCATCTTTGCCTTGAAAATGTAGCCTCTCTATCTAATGAAAGTCTTGATTTTTTACACTACTCCTTTGAACTCTCAAGGGTCAAGTCTAACCGCCTXXXXXXXXXXACCACAAATCAAGTATGGCACATACAACAAAATTGCAGTATGTGTAAAGAGGTATACTGGTGGAAAGAGACATGCCCCTATACTTAGTTGGAGACATATA
ATCCTCATCTTTGCCTTGAAAATGTAGCCTCTCTATCTAATGAAAGTCCTGATTTTTTACACTACTCCTTTGAATTCTCAAGGGTCAAGTCTAACCGCCTXXXXXXXXXXACCATAAATCAAGTATGGCACATACAACTAAATTGCAGTATGTGTAAAGAGGTATACGGGTGGAAAGAGACATGCCCCTATACTTAGTTGGAGACATATA
* * * * *
>Marker236941
ATTCATTAGAATTTGCGTTACAACATAAATCAGTATTTGAGGGGGTGGCCTCAGCTACATATGATGATTTGAGATTATGAATGATGAAATGATATTCTTCXXXXXXXXXXAGCGACACTAAGTCCTGCAATAAGAGCTTCATACTCAATAATGTTGTTTTTGCATGAGAAGTTTAGATGATAAGAAAGAGGAATCAACTTATTTGAAGGA
ATTCATTAGAATTTGTGTTACAACATAAATCAGTATTTGAGGGGGTGGCCTCAGCTACATATGATGATTTGAGATTATGAATGATGAAATGATATTCTTCXXXXXXXXXXAGCGACACTAAGTCCTGCAATAAGAGCTTCATACTCAATAATGTTGTTTTTGCATGAGAAGTTTAGATGATAAGAAAGAGGAATCAACTTATTTGAAGGA
*
>Marker206274
ATAAAACATTTCCTTTCCATGCAAATGTGTTTTACACACTTGAATCCTATTGGAGTTTCTTAATGAGTTTGAGTATCTATGTCCTCCTACTCTTCTCTTAXXXXXXXXXXATTAGATAAGGTCTCCATTATTTGACTCCATGCAAGATAGCCAACATTTCCTTGTCATAAATTAGATTCAACAAATTCTATGGTTCTTCATTCTTGCATG
ATAAAACATTTCCTTTCCATGCAAATTTGTTTTACAAACTTGAATCCTATTGGAGTTTCTTAATGAGTTTGAGTATCTATGTCCTCCTACTCTTCTCTTAXXXXXXXXXXATTAGATAAGGTCTCCATTATTTGACTCCATGCAAGATAGCCAACATTTCCTTCTCATAAATTAGCTTCAACAAATTCTATGGTTCTTCATTCTTGCATG
* * * *
>Marker119176
TTTCTTAATTTTTAGACCCTTGTCTATCTGATCCTTTGCTTTCTCCAGTTCTTTCCTCAAAGCAATAATTTCTTCTTCAAGTTTGGAGCATTCAACTAATXXXXXXXXXXACTAGAACTTCTTTTCCCATGTGTTCCAATCCAAGATCTACCTCATCTATTAGATTGTATCAAGGAACCCTACTCTGATACCAATTGTTGAACATACAGA
TTTCTTAATTTTTAGACCCTTGTCTATCTGATCCTTTGCTTTCTCCAGTTCTTTCCTCAAAGCAATAATTTCTTCTTCAAGTTTGGAGCATTCAACTAATXXXXXXXXXXACTAGAACTTCTTTTCCCATGTGTTCCAATCCAAGATCTACCTCATCTATTAGATTGTATCAAGGAACCCTACACTGATACCAATTGTTGAACATACAGA
TTTCTTAATTTTTAGACCCTTGTCTATCTGATCCTTTACTTTCTCCAGTTCTTTCCTCAAAGCAATAATTTCTTCTTCAAGTTTGGAGCATTCAACTAATXXXXXXXXXXACTAGAACTTCTTTTCCCATGTGTTCCAATCCAAGATCTACCTCATCTATTAGATTGTATCAAGGAACCCTACTCTGATACCAATTATTGAACATACAGA
* * *
>Marker140144
TAAAGGTAGACTGCTTGGGTTTCCCACCAAATTTTGGGCCCATCCAGAGCCTCTAAGTGCCTCAAATTTGACTTTGAATATTTCAATAGGATTTGTGGAAXXXXXXXXXXTAACAGTAGGTCGCTCTTATTTTTCCTCAAAAAGCTCCTTCTCTTGCTCATCAAACCAACTGACTTGCCAAACCACCAGTCCACCCTTGAAAAGAGAAAT
TAAAGGTAGACTGCTTGGGTTTCCCACCAAATTTTGGGCCCATCCAGAGCCTCTAAGTGCCTCAAATTTGACTTTGAATATTTCAATAGGATTTTTGGAAXXXXXXXXXXTAACAGTAGGTTGCTCTTATTTTTCCTCAAAAAGCTCCTTCTCTTGCTCATCAAACCAACTGACTTGCCAAACCACCAGTCCACCCTTGAAAAGAGAAAT
TAAAGGTAGACTGCTTGGGTTTCCCACCAAATTTTGGGCCCATCCAGAGCCTCTAAGTGCCTCAAATTTGACTTTGAATATTTCAATAGGATTTGTGGAAXXXXXXXXXXTAACAGTAGGTTGCTCTTATTTTTCCTCAAAAAGCTCCTTCTCTTGCTCATCAAACCAACTGACTTGCCAAACCACCAGTCCACCCTTGAAAAGAGAAAT
* *
>Marker137213
TGTCAGCTAGTTGAGCTATTAAGCATCTTATTGATTGGAGCTTCCCTTGAAGGCAACATAACTATTTGAGATTCTTTGGTGGAGGCATTTCGACTATTACXXXXXXXXXXGCATTCTTGAGGCCAAATGGCATAACAACCTAGTAGTAGGCTCCCCATGGACAAATGAGTGTCATCGTATGTTGGTCTTCTTTAGCTATTCTAATTTGAT
TGTCAGCTAGTTGAGCTATTAAGCATCTTATTGATTAGAGCTTCCCTTGAAGGCAACATAACTATTTGAGATTCTTTGGTGGAGGCATTTCGACTATTACXXXXXXXXXXGCATTCTTGAGGCCAAATGGCATAACAACCTAGTAGTAGGCTCCCCATGGACAAATGAGTGTCATCGTATGTTGGTCTTCTTTAGCTATTCTAATTTGAT
*
>Marker150382
CTTGTTGACTAAATTATTGTATGCAAACTTTCCTTGTGATAGAACTAGATCCCAATTTCCTTCCTTCTCTCCTACCTAGTATCTCAATAAGTTTCCCAAAXXXXXXXXXXTGCAAATCTATCCACCACTACGAATATAGGATCATTCCTTCTCCGTGTCTTTGGCAATCCTAATATAAAATCCATGCTTATGTCTTCCCAAGGCTTTTCC
CTTGTTGACTAAATTATTGTATGCAAACTTTCCTTGTGATAGAACTAGATCCCAATTTCCTTCCTTCTCTCCTACCTAGTATCTCAATAAGTTTCCCAAAXXXXXXXXXXTGCAAATCTATCCACCACTATGAATATAGGATCATTCCTTCTCCGTGTCTTTGGCAATCCTAATATAAAATCCATGCTTATGTCTTCCCAAGGCTTTTCC
*
>Marker135866
GATCCTATCTTTGTTTATCCTCTACAACATGTTTGCATGTTAGGGTTTGTCTATATATGGAAACCTAGTCTTTAAGGTCTTATGATCCTAATATTTTCTAXXXXXXXXXXAAGGAGTCACTTAAGTGACATCTTAAGGGTATCGATGTCATAAATTGACTACCCCCTAACCTAGGGCAACCGGTTCCATCTGGTAAGTGTTGTTTGATTG
GATCCTATCTTTGTTTATCCTCTACAACATGTTTGCATGTTAGGGTTTGTCTATATATGGAAACCTAGTCTTTAAGGTCTTATGATCCTAATATTTTCTAXXXXXXXXXXAAGGAGTCACTTAAGTGACATCTTAAGGGTATCGATGTCATAAATTGACTACCCCCTAACCTAGGGCAATCGGTTCCATCTGGTAAGTGTTGTTTGATTG
*
>Marker92169
AATAATTAAATATGGGGATCAATGGTTTTAGTATGCTCATGGTTTTGGGGAAGATCTAGTTTTACCATAATAAATCGAGTATTTGTCTAATCTTATCTTTXXXXXXXXXXGAATTTTTCCCATCGATGAGGAGTTTCCAACAATATATCTTATGTCACCATTGATGCTATGTTATATATTCTTTTGCATATAGATTTTGATCACTATGTT
AATAATTAAATATGGGGATCAATGGTTTTAGTATGCTCGTGGTTTTGGGGAAGATCTAGTTTTACCATAATAAATCGAGTATTTGTCTAATCTTATCTTTXXXXXXXXXXGAATTTTTCCCATCGATGAGGAGTTTCCAACAATATATCTTATGTCACCATTGATGCTATGTTATATATTCTTTTGCATATAGATTTTGATCACTATGTT
*
>Marker119180
AAAGAGAGAGGCAATGAAGGCACATTTTCCAATGTGATAAGGTAAGGCGAAAGCATTTAAAACATCTTTCACATAGGTGTCCCTTTGGCTTCTTTTATTAXXXXXXXXXXTTTCTTCTTGTAGGATACTTGCTGATCTTCTTTGATGTATCTTGATATAGAGTAGTAGGAGATGATGATGTTGCTTTCTTCATGAAGAGTAGGAGATGAT
AAAGAGAGAGGCAATGAAGGCACATTTTCCAATGTGATAAGGTAAGGCGAAAGCATTTAAAACATCTTTCACATAGGTGTCCCTTTGGCTTCTTTTATTAXXXXXXXXXXCTTCTTCTTGTAGGATACTTGCTGATCTTCTTTGATGTATCTTGATATAGAGTAGTAGGAGATGATGATGTTGCTTTCTTCATGAAGAGTAGGAGATGAT
*
>Marker149295
TCTTCTAATAATTCTTAGGTGATTCATTAGTTTTGCTTAATTTGCAACCAGTCACCATGGGAGTGCATACTAGTTTAGAGTCCTCCATCCCAAACTTCTTXXXXXXXXXXCAGTGCCTTTACTGAACCCATGATTACCATAAATGTTTGTCTAACCTTGCATACCAGACTCTGGGGACTTGCTTCAATCCATACAATGCCTTCTTCAATC
TCTTCTAATCATTCTTAGGTGATTCATTAGTTTTGCTTAATTTGCAACCAGTCACCATGGGAGTGCATACTAGTTTAGAGTCCTCCATCCCAAACTTCTTXXXXXXXXXXCAGTGCCTTTACTGAACCCATGATTACCATAAATGTTTGTCTAACCTTGCATACCAGACTCTGGAGACTTGCTTCAATCCATACAATGCCTTCTTCAATC
* *
>Marker563820
CTCTAAATCAATATCACATACATAAGTTGATTTTTTATTCTTATATGCTTCAAATTGTTTCCCATAAATGGATGGATCCATGTAAAGAGAGGCTATAAGCXXXXXXXXXXAAACATGAATGCCTAATAAAATGCTATAACACAATCAACCTAGAATCACATGGAACAAAGTATCTAAAGTAAGTGAGTGAACTATGATAGGACAAATAAT
CTCTAAATCAATATCACATACATAAGTTGATTTTTTATTCTTATATGCTTCAAATTGTTTCCCATAAATGGATGGATCCATGTAAAGAGAGGCTATAAGCXXXXXXXXXXAAACATGAATGCCTAATAAAATGCTATAACACAATCAACCTAGAATCACATGGAACAAAGTATCTAAAGTAAGTGAGCGAACTATGATAGGACAAATAAT
*
>Marker204730
TGCATAAGGCCTTTCATGGTCTCCAATGATCAAGACAAACTTGCAATGGCGCCCTCCATCCTTTGGAATCTTGCTTCAGCATCCAGATAATTCCCTTCTCXXXXXXXXXXCAAAAGAGAGAGTAAAGACACCATAAACACTAGAGATACCTTGGAGAAACCCTTGTGGGGTGCAAACTCTAGTTAAAATGTGGCTAACAATCCACATAGA
TGCATAAGGCCTTTCATGGTCTCCAATGATTGAGACAAACTTGCAATGGCACTCTCCATCCTTTGGAATCTTGCTTCAGCATCCAGATAATTCCCTCCTCXXXXXXXXXXCAAAAGAGAGAGTAAAGACACCATAAACACTAGAGATACCTTGGAGAAACCCTTGTGGGGTGCAAACTCTAGTTAAAATGTGGCTAACAATCCACATAGA
** * * *
>Marker131667
TTGTTCAAGAGGGCCTAAGCCCTTAACTTGATAGTTCATGTTTTGGAGGATGCGATCAACAATGGGACTAGGTGTAGGTGGAACATTAGACATGAGTCCTXXXXXXXXXXTGAGAAGTGGAAGTTGTCTCATTAGGGTTAGATGGAGGATGGATAGGAGCAATTTGGATACCTTGCTCATGGATGGGTATGGGATTATGGATAAGATCAA
TTGTTCAAGAGGGCCTAAGCCCTTAACTTGATAGTTCATGTTTTGGAGGATGCGATCAACAATGGGACTAGGTGTAGGTGGAACATTAGACACGAGTCCTXXXXXXXXXXTGAGAAGTGGAAGTTGTCTCATTAGGGTTAGATGGAGGATGGATAGGAGCAATTTGGATATCTTGCTCATGGATGGGTATGGGATTATGGATAAGATCAA
* *
>Marker41682
TCTCACACTATTTTATTGGCCTTTCCCATATTAACAAATCAGTTAAATATCTGTTCAATTTTATATTTTTTATTTACATTTGTCTTACCTTTGGAAAAAAXXXXXXXXXX--ATATTTTTATGCATTTATAAAAGAGATGTGTCAGCATTGGTAACAATGAAAGGGAAGTTTTTAATGATATATACAAGACTAGGGACGGCTGGGCTTAAAG
TCTCACACTATTTTATTGGCCTTTCCCATATTAACAAATCAGTTAAATATCTGTTCAATTTTATATTTTTTATTTACATTTGTCTTACCTTTGGAAAAAAXXXXXXXXXXTTATATTTTTATGCATTTATAAAAGAG--GTGTCAGCATTGGTAACAATGAAAGGGAAGTTTTTAATGATGTATACAAGACTAGGGACGGCTGGGCTTAAAG
*
>Marker112171
AGTAATCTTAGAAATTGCTAACTTAAAATAAAAATTGATGTGTTGGATAAACAAGATGAATGAATCCTGTATTTTTTAAGCTATGTTTAAGAGTAAGAACXXXXXXXXXXACTGGAAGCTCAGGCATGCCCTTCAGAGCAAGAAAACACCCCTATGTTGAAGCTAGTATATTAAGATGGGGCATATTATCATTTTCAAATTCATTGTTTG
AGTAATCTTAGAAATTGCTAACTTAAAATAAAAATTGATGTGTTGGATAAACAAGATGAATGAAACCTGTATTTTTTAAGCTATGTTTAAGAGTAAGAACXXXXXXXXXXACTGGAAGCTCAGGCATGCCCTTCAGAGCAAGAAAACACCCCTATGTTGAAGCTAGTATATTAAGATGGGGCATATTATCATTTTCAAATTCATTGTTTG
*
>Marker681966
TTACCTATCTTGGTGAGTGTGTTAAACCACCCATCATGTTCACCACTCTTCCATATAATGGCTTCCTTTGAAGCACTATACATCATAAAATACATAACATXXXXXXXXXXTTTAAAATTTTGGAAGAAAATAGTTCAATTGCCTATAGGTTGCCCCTCTGTCTTTCGTTATCCAAAATAAATAATGTCTTTTGCATTACATTATTAAGGA
TTACCTATCTTGGTGAGTGTGTTAAACCACCCATCATGTTCACCACTCTTCCATATAATGGCTTCCTTTGAAGCACTATACATCATAAAATACATAACATXXXXXXXXXXTTTAAAATTTTGGAAGAAAATAGTTCAATTGCCTATAGGTTGCCCCTCTGTCTTTCCTTATCCAAAATAAATAATGTCTTTTGCATTACATTATTAAGGA
*
>Marker348741
CTCTGTGCTTCATTGCATACTAAAGATAACTTTTTAATG-AAAAAAAACCCTTTATTGGTCAGGATGCAAGATTATTGTCAACAGTTTTGGGTGCAATTGGXXXXXXXXXXTTATCCACTGCAAAGTATTTAACCGGAACCTTAAGCCTGCATTTCCGAAAGATATTGACAGATCGTATTCATGCAGACTATTTTCAGGTATGTGGATATC
CTCTGTGCTTCATTGCATACTAAAGATAACTTTTTAATGAAAAAAAAACCCTTTATTGGTCAGGATGCAAGATTATTGTCAACAGTTTTAGGTGCAATT-GXXXXXXXXXXTTATCCACTGCAAAGTATTTAACCGGAACCTTAAGCCTGCATTTCCGAAAAATATTGACAGATCGTATTCATGCAGACTATTTTCAGGTATGTGGATATC
* *
>Marker29038
AAGGCTACCCAAATTGTATATCCATTGACATTCAAAAATATTTCAAAAACCCAAAAAAAATCAAATATTTCCAAAAAGACAAAAAAATCAAAATATGTCAXXXXXXXXXXCCCATTAATAAAACACAAATTAGAACTACATCTCATCTTTATCATTAAGTGCCTTGATCCCGTGGATATAGGGTATGCAGGCAATCTAGGATACAAAGGA
AAGGCTACCCAAATTGTATATCCATTGACATTCAAAAACATTTCAAAAACCCAAAAAAAATCAAATATTCCCAAAAAGACAAAAAAATCAAAATATGTCAXXXXXXXXXXCCCATTAATAAAACACAAATTAGAACTACATCTCATCTTTATCATTAAGTGCCTTGATCCCGTGGATATAGGGTATGTAGGCAATCTAGGATACAAAGGA
* * *
>Marker262890
TTAAAATGTAAAAGCATGGTTGAAGAGTTGGTTGGTTGTTCCTTGGATTTTGATTTCTGTGAACATTGTCTATATGGAAAGAAAAATCATGTTTAGTTTTXXXXXXXXXXTAGTGGAGAATTCTATTTAGTAGAGTTTGATAAGTTATGTAAGGAAAATAACATTTTGCAACTTAAGATAACTCTATACACCCTTGGTGGATTCAAAATT
TTAAAATGTAAAAGCATGGTTGAAGAGTTGGTTGGTTGTTCCTTGGATTTTGATTTTTGTGAACATTGTCTATATGGAAAGAAAATTCATGTTTAGTTTTXXXXXXXXXXTAGTGGAGAATTCTATTTAGTAGAGTTTGATAAGTTATGTAAGGAAAATAACATTTTGCAACTTAAGATAACTCTATACACCCTTGGTGGATTCAAAATT
* *
>Marker191462
TAATATGACTCAATGGTCATAATCGAGGGGAGTATATCCCTCTGACTCACTATCAGATACTTATTTAAGATGAGTATATCCTTCTGATTCACTATCAAATXXXXXXXXXXTAACTATGGCATCTCATTCTTTCTTGAATTTCAGGTAGCACTCATTTTTTATAACTGACTTCTGGGCAGTCATCTTGAGTCGCACCATCCTGGCACAAGA
TAATATGACTCAATGGTCATAATCGAGGGGAGTATATCCCTCTGACTCACTATCAGATACTTATTTAAGATGAGTATATCCTTCTGATTCATTATCAAATXXXXXXXXXXTAACTATGGCATCTCATTCTTTCTTGAATTTCAGGTAGCACTCATTTTTTATAACTGACTTCTGGGCAGTCATCTTGAGTCGCACCATCCTGGCACAAGA
*
>Marker441591
TCTGAATTTGATTTCATTCACCTCCCTGGAGTTGAAAATATTTTTGCAAATTTCATGTCTAGAGAAGGGCACACTTTAAACAAAATTTAGATTTACAAACXXXXXXXXXXCTCTATCCTAAAATTCTTTATTTGTTTGTTGTGATTAATTAATTTTTTGTAAGATATTTATATGAAGTATATTATTTTTCCTTAGAGGTATATTGGGGAG
TATGAATTTGATTTCATTCACCTCCCTGGAGTTGAAAATATTTTTGCAAATTTCATGTCTAGAGAAGGGCACACTTTAAACAAAATTTAGATTTACAAACXXXXXXXXXXCTCTATCCTAAAATTCTTTATTTGTTTGTTGTGATTAATTAATTTTTTGTAAGATATTTATATGAAGTATATTATTTTTCCTTAGAGGTATATTGGGGAG
*
>Marker510222
TCTAAGATAAGTTTGATACAAACATTTCAATACAATTCATACATTGTTATGATAGGACCAAACCTATTTTGTGTGTATGCTACAAACATTCAATCTTATTXXXXXXXXXXTCTACCACACAATGATACTGATCTCTTCTCCAAACATCACTATATTCATTCAACCAGAGGTTTTCTATTGACTAATCCAAACAAAAAAATCCAAGACTTA
TCTAAGATAAGTTTGATACAAACATTTCAATACAATTCATACATTGTTATGATAGGACCAAACCTATTTTGTGTGTATGCTATAAACATTCAATCTTATTXXXXXXXXXXTCTACCACACAATGATACTGATCTCTTCTCCAAACATCACTATATTCATTCAACCAGAGGTTTTCTATTGACTAATCCAAACAAAAAAATCCAAGACTTA
*
>Marker301557
AAACTACCAAGATTCACTTTCTTGCAGAGATTCTTCAACTGCTTTAAATAGAAGGATGAGGAGGAGACCCCTTATGAAACCGATGAATCAGAACAGCAGCXXXXXXXXXXAGATAAAAGCAGCAGTTGTCCGAAGTTAGAGCTTGAAATGGAGGATATTTGTAATAAGGAGCCATGAGACCCAACACACAGGAACTTGGGAAAGGGGTTA
AAACTACCAAGATTCACTTTCTTGCAGAGATTCTTCAACTGCTTTAAATAGAAGGATGAGGAGGAGACCCCTTATGAAACCGATGAATCAGAACAGCAGCXXXXXXXXXXAGATAAAAGCAGCAGTTGTCCGAAGTTAGAGCTTGAAATGGGGGATATTTGTAATAAGGAGCCATGAGACCCAACACACAGGAACTTGGGAAAGGGGTTA
*
>Marker213960
TATCCCTGCTAAAAGCTTCTTGTTATCGCTGCTAAAAGCTCCTTGGTGGAAGCAGAACAAGATAATAAGAAGCATTTCACAAAACTCTATTTTAGGCAGAXXXXXXXXXXATTTTTAAATCTGTTACATTCAATAGTTTACAGAACCATTAAGCAAATGGAACAAGATATGCAAACTGCGTATGAGGTTACACACCACAAAAAAATTGCA
TATCCCTGCTAAAAGCTTCTTGTTATCGCTGCTAAAAGCTCCTTGGTGGAAGCAGAACAAGATAATAAGAAGCATTTCACAAAACTCTATTTTAGGCAGAXXXXXXXXXXATTTTTAAATCTGTTACATTCAATAGTTTATAGAACCATTAAGCAAATGGAACAAGATATGCAAACTGCGTATGAGGTTACACACCACAAAAAAATTGCA
*
>Marker520548
AGACTCCCCTTAACTATTCTATTGTCTTTTGTCTTCACCAAATAATCCTCTTCCTCTAGAGTTGTTCTATTGCTTCCTAGCCAATTTCTCTTCAACTCTCXXXXXXXXXXTTGCTACCATCCAATCCCATGTCCGAATCTTCTCTTTTCCTTTCCTTTGCTAATCCATTTGCACATGATCCCACCACAAGGATGGATGACCCTTCAGCTT
AGACTCCCCTTAACTATTCTATTGTCTTTTGTCTTCACCAAATAATCCTCTTCCTCTAGAGTTGTTCTATTGCTTCCTAGCCAATTTCTCTTCAACTCTCXXXXXXXXXXTTGCTACCATCCAATCCCATGTCCGAATCTTCTCTTTTCCTTTCCTTTGTTAATCCATTTGCACATGATCCCACCACAAGGATGGATGACCCTTCAGCTT
*
>Marker112450
AGCATGGAATCCTATCTAACCTCATTAGGGTTTGATGTATGGAAATCTATTGTGGATGGTTATACTACTCATACAACTCCTCCAATAGACCAGACTAGTAXXXXXXXXXXAGTGGATGATATTGTCAATGTTATCAAAGGACTTGCTGAAGAAATGAAAGAATCGGTAATTGTGAAGAAGGTTTTAAGATCCCTTTGTTGAACACACAGA
AGCATGGAATCCTATCTAACCTCATTAGGGTTTGATGTATGGAAATCTATTGTGGATGGTTATACTACTCATACAACTCCTCCAATAGACTAGACTAGTAXXXXXXXXXXAGTGGATGATATTGTCAATGTTATCAAAGGACTTGCTGAAGAAATGAAAGAATCGGTAATTGTGAAGAAGGTTTTAAGATCCCTTTGTTGAACACACAGA
*
>Marker311721
TCCATTTGACATC-AAGCATAGGGGAGGTCTTGTTTTGTGATGGCAAATATGTCATTGTAGATTCCAATAGTGAAGGCTCGATCTGTCATAGGTTGTGGAGXXXXXXXXXXAATCTACTAAGTGACCAATAACAATAAGATATGTCGATTCCATCAACCTATGTTGTCTTCTCGGATTCTGCCCTATCTTCAAAGATTCTTCCTTCATCAC
TCCATTTGACATCAAAGCATAGGGGAGGTCTTGTTTTGTGATGGCAAATATGTCATTGTAGATTCCAATAGTGAAGGCTCGATCTGTCATAGGTTGTGGA-XXXXXXXXXXAATCTACTAAGTGACCAATAACAATAAGATATGTCGATTCCATCAACCTATGTTGTCTTCTCGGATTCTGCCCTGTCTTCAAAGATTCTTCCTTCATCAC
*
>Marker293412
ACGAGTTTATCTCATTACGTTCATAACAACCTTTTCATCTTGGTGTTGAACAGATTCCTTTGATTTCATTGGGAGTAGTGTTGAAATCCCCATCCAATGGXXXXXXXXXXAAATTGACAACATGGGATTTATAAGTATTTGCAAGAACAAAATACGTGTAGATAATGTTCGCCTACTTGAGAATGTGACTGCTGCAGCCTATTCAAAGAC
ACGAGTTTATCTCATTACGTTCATAACAACCTTTTCATCTTGGTGTTGAACAGATTCCTTTGATTTCATTGGGAGTAGTGTTGAAATCCCCATCCAATGGXXXXXXXXXXAAATTGACAACATGGGATTCATAAGTATTTGCAAGAACAAAATACGTGTAGATAATGTTCGCCTACTTGAGAATGTGACTGCTGCAGCCTATTCAAAGAC
*
>Marker92881
TTGTGCCTAGTCAACGATGCATTTATTGCTAGGTAGTTGACCTTAGAGCTATGTGGGACACATGTCAAACCCTCAGTCAACACACCTCGTAGACACTATAXXXXXXXXXXCCTCCTTTTCTACATTTAATGCCCCTATTTTCTTGATATTGACAGTTTTCAAACATTTTGTTGTCCAATCCTCATTTTGAGAATTTGAGAGCCCATATCT
TTGTGCCTAGTCAACGATGCATTTATTGCTAGGTAGTTGACCTTAGAGCTATGTGGGACACATGTCAAACCCTTAGTCAACACACCTCGTAGACACTATAXXXXXXXXXXCCTCCTTTTCTACATTTAATGCCCCTATTTTCTTGATATTGACAGTTTTCAAACATTTTGTTGTCCAATCCTCATTTTGAGAATTTGAGAGCCCATATCT
*
>Marker183219
TCATTTGCATTTGCTTTTTTTTATTCTGTTGTATTGCCTGTTTTTCTCATTTCATTTAATTCCATTAGTTGTTCTCACCTTTTTTCCATCAGTTATGGGAXXXXXXXXXXTGAGATTAGCACTATGAGATCATAATGCCATAAGACTTACAAAATCTTTTAAACTCATCTGATCTAAAACACATTTCATTGTCAGTTATAAGCCTCAAAA
TCATTTGAATTTGCTTTTTTTTATTCTGTTGTATTGCCTGTTTTTCTCATTTCATTTAATTCCATTAGTTGTTCTCACCTTTTTTCCATCAGTTATGGGAXXXXXXXXXXTGAGATTAGCACTATGAGATCATAATGCCATAAGACTTACAAAATCTTTTAAACTCATCTGATCTAAAACACATTTCATTGTCAGTTATAAGCCTCAAAA
*
>Marker353198
AAGACTTAGTTTATTACATGTTGAATAATGAGTGTCCTAGACATCTAAATTCAACTCAAGGAAGAGCCTTGTGGGCCTTAAAAGTGTAAATTTTATGATAXXXXXXXXXXTGATTTAAGCTCACCCTTTTCATAATGGGATTGGAATTTTGGTGCCATTAAATTGAATGCTTCAATTGGCCACAAGTTTATTTTGATAGCAACATACTAT
AAGACTTAGTTTATTACATGCTGAATAATGAGTGTCCTAGACATCTAAATTCAACTCAAGGAAGAGCCTTGTGGGCCTTAAAAGTGTAAATTTTATGATAXXXXXXXXXXTGATTTAAGCTCACCCTTTTCATAATGGGATTGGAATTTTGGTGCCATTAAATTGAATGCTTCAATTGGCCACAAGTTTATTTTGATAGCAACATACTAT
*
>Marker243833
CATAAGGTGGCTGATTGTATCTATTATCATTCTAGTTTCAATTCCACATATGTTGATTGTCTCTTTGATAGTAACTATTATTTTAGGGATGATCCATAATXXXXXXXXXXCTTCCTTATAGGACCTATACGATAATTTTTGTATTTCTCTTATATCCCTATTGACGGTGTGCAAGAAAAGGTCACATTGTTCTTTGTGGTCCATATTAGG
CATAAGGTGGCTGATTGTATCTATTATCATTCTAGTTTCAATTCCACATATGTTGATTGTCTCTTTGATAGTAACTATTATTTTAGGGATGATCCATAATXXXXXXXXXXCTTCCTTATAGGACCTATACAATAATTTTTGTATTTCTCTTATATCCCTATTGACGGTGTGCAAGAAAAGGTCACATAGTTCTTTGTGGTCCATATTAGG
* *
>Marker50043
CTGCTCTCAATATCTTATGCATTGTAGCTAAATGGGAACCATGAGCCATTCCATACTTATCATGTAATTCTGACAATACCTTATCTACTTCAACTCTGTTXXXXXXXXXXTGGGATAATTTCTATATCAAACTCTTGTAATGTTGTAAGACATTTAGCTCTTTTCTCTCCAGGTTCATTCTGCATCAGCAGCATCTTCACGGCTGCATTT
CTGCTCTCAATATCTTATGCATTGTAGCTAAATGGGAACCATGAGCCATTCCATACTTATCATGTAATTCTGACAATACCTTATCTACTTCAACTCTGTTXXXXXXXXXXTGGGATAATTTCCATATCAAACTCTTGTAATGTTGTAAGGCATTTAGCTCTTTTCTCTCCAGGTTCATTCTGCATCAGTAGCATCTTCACGGCTGCATTT
* * *
>Marker552180
TGAATCTCTTTGCTGCTCTATGCTTAGCCTGTGTAAACTGCCCGGGTTCAAACTGCTACTTGAATCGCTTGCACTGGGCATCACTAACCACAGTGGGTTAXXXXXXXXXXAGTCACCAAGATATGCCAGAACAGCAATGAGAACTTCATTTTCAGAATCAGGGTATGTGGGTAAAGCGTAATAAATGGCTGATATTGATATTGAGCCCCT
TGAATCTCTTTGCTGCTCTATGCTTAGCCTGTGTAAACTGCCCGGGTTCAAACTGCTACTTGAATCGCTTGCACTGGGCATCACTAACCACAATGGGTTAXXXXXXXXXXAGTCACCAAGATATGCCAGAACAGCAATGAGAACTTCATTTTCAGAATCAGGGTATGTGGGTAAAGCGTAATAAATGGCTGATATTGATATTGAGCCCCT
*
>Marker107937
ATTCTTATAAAGACTGTAGTTTTGTTTACATTCAAATGCAGTTTTTTTTTTCCGAGTTGCTAGCATAATGAAATCCGTAATTGGTGAGTTGTTTGAGAGTXXXXXXXXXXCTTTGACGACCTTTGGAAACAAAGACTCAAGTTTAACTTACAAATGAGAAATGGCTAGGTTTTGTCTTACAACTTGACATGATATGTAATATTTGGTATG
ATTCTTATAAAGACTGTAGTTTTGTTTACATTCAAATGCAGTTTTTTTTTTCCGAGTTGCTAGCATAATGAAATCCGTAATTGGTGAGTTGTTTGAGAGTXXXXXXXXXXCTTTGACGACCTTTGGAAACAAAGACTCAAGTTTAACTTAGAAATGAGAAATGGCTAGGTTTTGTCTTACAACTTGACATGATATGTAATATTTGGTATG
*
>Marker266274
CATTCTCCTGATATTGTCTTTCTTCAGGAAACTAAGTTAATTGTGGATGATTTGTTAGATAGAGCTCCTAGTATCTGAACTTGTGAACTTGTGGTTTGTGXXXXXXXXXXGGAGGAAAAAAGAGGTGGCATTGTTAGGCTTGACCCTTCTGCTTATCTCTTAAGGGATAACATAGATCTTTTGCATTTAATTGATGTGAATTTAAGTAAT
CATTCTCCTGATATTGTCTTTCTTCAGGAAACTAAGTTAACTGTGGATGATTTGTTAGATAGAGCTCCTAGTATCTGAACTTGTGAACTTGTGGTTTGTGXXXXXXXXXXGGAGGAAAAAAGAGGTGGCATTGTTAGGCTTGACCCTTCTGCTTATCTCTTAAGGGATAACATAGATCTTTTGCATTTAATTGATGTGAATTTGAGTAAT
CATTCTCCTGATATTGTCTTTCTTCAGGAAACTAAGTTAACTGTGGATGATTTGTTAGATAGAGCTCCTAGTATCTGAACTTGTGAACTTGTGGTTTGTGXXXXXXXXXXGGAGGAAAAAAGAGGTGGCATTGTTAGGCTTGACCCTTCTGCTTATCTCTTAAGGGATAACATAGATCTTTTGCATTTAATTGATGTGAATTTAAGTAAT
* *
>Marker540915
CAAGGAGGCACCCTGTGCACTGGCTGTAACCAAGGGAAACCTTGGTCCCTAACAGCATTAAAGAATAATTTTTAAGTTTAAGAGGATAAAAAACCAAAAAXXXXXXXXXXTCCTTCAAAACAGACACTTTCTGCCACTTTGGAGACATGTTATGATGCTAGAGTAGATTCTGGGATGAGAAGGTTCGGCAAATCAACGAATATAAAAACA
CAAGGAGGCACCCTGTGCACTGGCTGTAACCAAGGGAAACCTTGGTCCCTAACAGCATTAAAAAATAATTTTTAAGTTTAAGAGGTCAAAAAACCAAAAAXXXXXXXXXXCCCTTCAAAACAGACACTTTCTGCCACTTTGGAGACATGTTATGATGCTAGAGTAGATTCTGGGATGAGAAGGTTCGGCAAATCAACGAATATAAAAACA
* ** *
>Marker203505
ATGGATGCTTTTGGTAGTAAGTTTACAAAGCCTTCACTTGAGGAGTTTGTTGCACAACTCACAAGAGAACAAGCCAAGATACTACACATTGGCACATTGAXXXXXXXXXXCTTCAAAAGCATAATATTGAGTATCCTTCATCAACATTAGTTTTACCCAATTCTTCTTCTTCAACATTGTTATATCAGAAATTGTCCTCCTATATGGAAT
ATGGATGCTTTTGGTAGTAAGTTTACAAAGCCTTCACTTGAGGAGTTTGTTGCACAACTCACAAGAGAACAAGCCAAGATACTACACATTGGCACATTGAXXXXXXXXXXCTTCAAAAGCATAATATTGAGTATCCTTCATCAACATTAGTTTTACCCAATTCTTCTTCTTCAACATTGTTATATCAAAAATTGTCCTCCTGTATGGAAT
* *
>Marker186935
TCATCAGGCTTCATTTGCCAGGGCCCACTTTTCACCTACCTAACCTCTCCCCTCTTCCTAGTCTATATAAACTCACTAACTAGCTTGTATTTTGCATCTTXXXXXXXXXXCGTTTATGGATAACTGGTTGTCTTTTACAATGTTTGTGATCATGCTTAAATATCTTTCTTGTTGACCATTAAGCAATTTGCTAATACTCTATGAGAGATT
TCATCAGGCTTCATTTGCCAAGGCCCACTTTTCACCTACCTAACCTCTCCCCTCTTCCTAGTCTATATAAACTCACTAACTAGCTTGTATTTTGCATCTTXXXXXXXXXXCGTTTATGGATAACTGGTTGTCTTTTACAATGTTTGTGATCATGCTTAAATATCTTTCTTGTTGACCATTAAGCAATTTGCTAATACTCTGTGAGAGATT
* *
>Marker245861
TGTTATAATACATCAATAGCACATAATATACAAAGTGTCCTTAATCTTTTTGATTTTATAGTTCAATATCCTTCATAATAGAGTTTCAACTAGGTGTTGTXXXXXXXXXXTAGGAACTATGTATTATATTGGAATGTTGCATCCAACCCATATATTAAATGAAATGGACATTATTTTATTAGCCTTTTATATGTTGTGTGGTAGGCCCAT
TGTTATAATACATCAATAGCACATAATATACAAAGTGTCCTTAATCTTTTTGATTTTATAGTTCAATATCCTTCATAATAGAGTTTCAACTAGGTGTTGTXXXXXXXXXXTAGGACCTATGTATTATATTGGAATGTTGCATCCAACCCATATATTAAATGAAATGGACATTATTTTATTAGCCTTTTATATGTTGTGTGGTAGGCCCAT
*
>Marker329826
TAAATATATGAGAGAAATATCGATCATGATACTTAGAGCACACTTCAATTCTGAAGGGAAATAAAAGCATTGAACCTACATCATCATTTAGACCATCTCCXXXXXXXXXXCATAAGGCACAATGTTTATTTGTAGACATTTTTGTGTCAGTTTAGACTTTGAGATATTCATCAAACCAAGGTAGACAATTCACAATGGTGAATTATTCCA
TAAATATATGAGAGAAATATCGATCATGATACTTAGAGCACACTTCAATTCTGAAGGGAAATAAAAGCATTGAACCTACATCATCATTTAGACCATCTCCXXXXXXXXXXCATAAGGCACAATGTTGATTTGTAGACATTTTTGTGTCAGTTTAGACTTTGAGATATTCATCAAACCAAGGTAAACAATTCACAATGGTGAATTATTCCA
* *
>Marker95513
TTCAAGAATAACTAGCCTTTGAAAAGGCATAGGACTGAATGACAACCTCCTACTTGCCTTGGAAAGGCTTACAAATGAGAGGAAAACACAGGACTGCCCCXXXXXXXXXXATAGATCACCTAGGACTCAAGTATATTCTTACTCAACCCAATATTAATGCTTGTCAAAGGAGATGGCTTGAGTTTCTCAGTGATTATGATTTTGGGATTG
TTCAAGAATAACTAGCCTTTGAAAAGGCATAGGACTGAATGACAACCTCCTACTTGCCTTGGAAAGGCTTACAAATGAGAGGAAAACACAGGACTGCCCCXXXXXXXXXXATAGATCACCTAGGACTCAAGTATATTCTTACTCAACCCAATATTAATGCTTGTCAAAGGAGATGGCTTGAGTTTCTCGGTGATTATGATTTTGGGATTG
*
>Marker142669
CCTTAATGATTCTGATAACCTACCATATGATGATGATACAACAAAGAAGCTTGCCTATTTGGAATGTCTTGAACGTTGTGATGACATTGAGGCTTCTCCTXXXXXXXXXXCTTGCTTCTATAGAGTTCAGTGTTGCTACATCCATGGCTTCTAATGGTTTAGTGTTGTAGGACATTCATATTAGTCTTCCAGATATAGCTTCTTGGGATG
CCTTAATGATTCTGATAACCTACCATATGATGATGATACAACAAAGAAGCTTGCTTATTTGGAATGTCTTGAACGTTGTGATGACATTGAGGCTTCTCCTXXXXXXXXXXCTTGCTTCTATAGAGTTCAGTGTTGCTACATCCATGGCTTCTAATGGTTTAGTGTTGCAGGACATTCATATTAGTCTTCCAGATATAGCTTCTTGGGATG
* *
>Marker357691
AAGAGAAAACACAACTTCCCGAATCACCTCCATGCTGAAAGGCTTCGTCAGATCCTTGTTTTGCTCTTCCTTAATAATTGACAAGATGTTACAAAGCAATXXXXXXXXXXTGATTTCCTCCATCCTAAGATATGAGTTTAATTATTCCTACAATTTGCTCACCAAATTCATGTTCTCTACTAAGTCCCCACTTTTGGTGATAGCTTCTTC
AAGAGAAAACACAACTTCCCGAATCACCTCCATGCTGAAAGGCTTCGTCAAATCCTTGTTTTGCTCTTCCTTAATAATTGACAAGATGTTACAAAGCAATXXXXXXXXXXTGATTTCCTCCATCCTAAGATATGAGTTTAATTATTCCTACAATTTGCTCACCAAATTCATGTTCTCTACTAAGTCCCCACTTTTGGTGATAGCTTCTTC
*
>Marker253496
AGCCTTTGTAAAGAAGCATAGACCTTTAAAATTTAGGGCAGCATATCAAAGACACAACAAAGATATATGATAGGCAGCCACAATATTGGGGCTTAGCCAAXXXXXXXXXXCAGCCTAACTCAATCCAAAGGTGTCAACCATCACATAGAGGGCGTTGCACATCAAACACAAAGTCTGTAGTCAAAATGAAGATGGTGCGGTTAGAATGAA
AGCCTTTGTAAAGAAGCATAGACCTTTAAAATTTAGGGCAGCATATCAAAGACACAACAAAGATATATGATAGGCAGCCACAATATTGGGGCTTAGCCAAXXXXXXXXXXCAGCCTAACTCAATCCAAAGGTGTCGACCATCACATAGAGGGCGTTGCACATCAAACACAAAGTCTGTAGTCAAAATGAAGATGGTGCGGTTAGAATGAA
*
>Marker423500
TTCTTCAAGCAGCCAATCTTTTTAAAACATAAATTGCACTATAACAGCAAGAGGTGACAGTCTATATAAATTTAGAAAAATATATAGAGATATTGGCTATXXXXXXXXXXCAACTTTTGACTAAGGTTGAGCAGCAATGACTTATTATATGAGGTGATTATCCATGTGGAGAAGTCATGTTTGATATAATGTGCAGTATGCTAATGCCAT
TTCTTCAAGCAGCCAATCTTTTTAAAACATAAATTGCACTATAACAGCAAGAGGTGACAGTCTATATAAATTTAGAAAAATATATAGAGATATTGGCTATXXXXXXXXXXCAACTTTTGACTAAGGTTGAGCAGCAATGACTTATTATATGAGGTGATTATCCATGTGCAGAAGTCATGTTTGATATAATGTGCATTATGCTAATGCCAT
* *
>Marker372786
TTCATGATTATCCTTGGCCTATATTTTTTACACCTAACATTGAAGATGTCTTACTTGTTTGTCACATATTGCATTTATGTCACTTATCACAATACACAATXXXXXXXXXXATACCAAACCACTTTCTATAGATGCAAAAAGAATTCCAACCCTACTCTCTTTTCCCTTTCTCTCTCATTTTCATAGACAATTAAATATTTTCCAATTGTG
TTCATGATTATCCTTGGCCTATATTTTTTACACCTAACATTGAAGATGTCTTACTTGTTTGTCACATATTGCATTTATGTCACTTATCACAATACACAATXXXXXXXXXXATACCAAACCACTTTCTATAGATGCAAAAAGAATTCCAACCCTACTCTCTCTTCCCTTTCTCTCTCATTTTCATAGACAATTAAATATTTTCCAATTGTG
*
>Marker345429
CGACCCATATGGTCTAAGTTAGTTTCGACTCGATAGTTGTTGATTTGTCATCACAGAAATGGTCTTCAGACATTAGTCCTTGTTTGATATGAATATAGTGXXXXXXXXXXTAACATGAAGTATAAGTATAATTTATACTTAATAGACATGGGTTCTTAAGAGAACGTGGTAGTCTTGCAATTAAATGCAAAACCACTTCACTTAATTTGT
CGACCCATATGGTCTAAGTTAGTTTCGACTCGATAGTTGTTGATTTGTCATCATAGAAATGGTCTTCAGACATTAGTCCTTGTTTGATATGAATATAGTGXXXXXXXXXXTAACATGAAGTATAAGTATAATTTATACTTAATAGACATGGGTTCTTAAGAGAACGTGGTAGTCTTGCAATTAAATGCAAAACCACTTCACTTAATTTGT
*
>Marker89580
GAGTCGATTCCTAGCGGCTGGGAGACTTCCAAATGGCTGGGAGAGGATAGCTAGCATAACAAACTTCTAACTGACTTCAACATAAACCTAGACTGACTTAXXXXXXXXXXCTACCAGTCGAATACAAGGCTAATCCACCCCCGAGCTTCTTCTAAGATTCAATGACTATGTTATAAAATAATTTTTTGAGATTATCCTCACATAATCCTA
GAGTCGATTCCTAGCGGCTGGGAGACTTCCAAATGGCTGGGAGAGGATAGCTAGCATAACAAACTTCTAACTGACTTGCACATAAACCTAGACTGACTTAXXXXXXXXXXCTACCAGTCGAATACAAGGCTAATCCACCCCCGAGCTTCTTCTAAGATTCAATGACTATGTTATAAAATAATTTTTTGAGATTATCCTCACATAATCCTA
**
>Marker162097
TTGTTTTTTATGATACTATAATAATTTAGCATTAATTGCTAATGGATAATATAATTCAAAAAATAAAGTGTAACTAGTTGATGTATGGGGTCATTGTTGAXXXXXXXXXXTGCCAAGTGAGAAATTGATTTGATGTATGGGACCCTCTTGGTAGATGCCTAGTAGGAGCTTGGTTCCTTTCCCATTTATCTTATACATTGTCCTATAAGG
TTGTTTTTTATGATACTATAATAATTTAGCATTGATTGCTAATGGATAATATAATTCAAAAAATAAAGTGTAACTAGTTGATGTATGGGGTCATTGTTGAXXXXXXXXXXTGCCAAGTGAGAAATTGATTTGATGTATGGGACCCTCTTGGTAGATGCCTAGTAGGAGCTTGGTTCCTTTCCCATTTATCTTATACATTGTCCTATAAGG
*
>Marker126270
TACTCTTCACTATAGCATGCTGTGATATAGGTTATAAGGCCATGGCTTTGTAACTATAACAACAAAGCTTATAAAGGGTTTTAGAACCCTTCCTGATAATXXXXXXXXXXCCTTTTGTAGCATTATAACATGGATGTTATAACTACTCCTATAACATGTCATTATGGGCATTTACTTAGCTCTTTATGCCCTTTTATTATGGCATATGCC
TACTCTTCACTATAGCATGCTGTGATATAGGTTATAAGGGCATGGCTTTGTAACTATAACAACAAAGCTTATAAAGGGTTTTAGAACCCTTCCTGATAATXXXXXXXXXXCCTTTTGTAGCATTATAACATGGATGTTATAACTACTCCTATAACATGTCATTATGGGCATTTACTTAGCTCTTTATGCCCTTTTATTATGGCATATGCC
TACTCTTCACTATAGCATGCTGTGATATAGGTTATAAGGCCATGGCTTTGTAACTATAACAACAAAGCTTATAAAGGGTTTTAGAATCCTTCCTGATAATXXXXXXXXXXCCTTTTGTAGCATTATAACATGGATGTTATAACTACTCCTATAACATGTCATTATGGGCATTTACTTAGCTCTTTATGCCCTTTTATTATGGCATATGCC
* *
>Marker111823
TCGTTGGTTGATGGTATAAAGGTGTTTTATAGCATGATGTTTGAACCATGTGTTATGGAAGTGACCTAATTGAAATGTATGATCTCGTGCAACCTCGTGTXXXXXXXXXXATCCATGTGTCCATTTTCGTTCATGGGTTTTGGGGGCTTTTTAAATGATGATTTTTGAGCTTTTTATTGTTAATTTCATGTGTTTAAGGGTCCTAGGTCA
TCGTTGGTTGATGGTATAAAGGTGTTTTATAGCATAATGTTTGAACCATGTGTTATGGAAGTGACCTAATTGAAATGTATGATCTTGTGCAACCTCGTGTXXXXXXXXXXATCCATGTGTCCATTTTCGTTCATGGGTTTTGGGGGCTTTTTAAATGATGATTTTTGAGCTTTTTATTGTTAATTTCATGTGTTTAAGGGTCCTAGGTCA
TCGTTGGTTGATGGTATAAAGGTGTTTTATAGCATGATGTTTGAACCATGTGTTATGGAAGTGACCTAATTGAAATGTATGATCTTGTGCAACCTCGTGTXXXXXXXXXXATCCATGTGTCCATTTTCGTTCATGGGTTTTGGGGGCTTTTTAAATGATGATTTTTGAGCTTTTTATTGTTAATTTCATGTGTTTAAGGGTCCTAGGTCA
* *
>Marker377750
GTATGACTTCCTATCCTGTCAGCCCAAAACACAATCCAATATGATTTGCAGAGAGAACCAAAGCATATAGAACATTTATATAGGTTAGAACAACCTATAAXXXXXXXXXXATCATTATACTATCAGTACAGAGTCTGATCCT-TAGTCAACTCTTCCTTTGACTCTGGGGGATTTCAAGACTTGAAACTTTGGATTTGGACTCTATGAATA
GTATGACTTCCTATCCTGTCAGCCCAAAACACAATCCAATATGATTTGCAGAGAGAACCAAAGCATATAGAACATTTATATAGGTTAGAACAACCTATAAXXXXXXXXXXATCATTATACTATCAGTACAGAGTCTGATCCTCTA-ACAACTCTTCCTTTGACTCTGGGGGATTTCAGGACTTGAAACTTTGGATTTGGACTCTATGAATA
* *
>Marker259018
GTGAAATTTGTAGGTAAAGCGTTTACCTTGAAAGATAGATACATTCATTTGGAATTCAAATACATTTAGGTTAGTAATAGGAGAATCCTGTTGGCATGCAXXXXXXXXXXTTATCACTACTTTGTTTGCATTTTGATTGAAGCTATGATATGTAATTAGTGTGGATAGTCCACTACATAATTTATAAACATGTATCTTATTCAACCTTAA
GTGAAATTTGTAGGTAAAGCGTTTACCTTGAAAGATAGATACATTCATTTGGAATTCAAATACATTTAGGTTAGTAATAGGAGAATCCTGTTGGCATGCAXXXXXXXXXXTTATCACTACTTTGTTTGCATTTTGATTGAAGCTATGATATGTAATTAGTGTGGATAGTTCACTACATAATTTATAAACATGTATCTTATTCAACCTTAA
*
>Marker302168
TTTATTTGAACC--CTATTGACACATGACAAGCCATATATCTAAGAAAAACCTTCTTTCAAAGGTGTTTAATGATTTTTTCCTCCTAAGATTTTTTTGTTAGXXXXXXXXXXAGATGTAATTCATAATGCATGATTTGTTAAATAGTAAAAGGTTACATTCATTTGTTACTAGCACCCTTGAGAGTTTAACCTTCTAGAGCTTAGAGCCCAT
TTTATTTGAACCAGGTATTGACACATGACAAGCCATATATCTAAGAAAAACCTTCTTTCAAAGGTGTTTAATGATTTTTGCCTCCTAAGAATTTTTTGTT--XXXXXXXXXXAGATGTAATTCATAATGCATGATTTGTTAAATAGTAAAAGGTTACATTCATTTGTTACTAGCACCCTTGAGAGTTTAACCTTCTAGAGCTTAGAGCCCAT
* * *
>Marker308194
ATTAGTAAGTTGCAATTTAAACATGTTTATTTAGTGTGTTTCACTTTGGAATCTATTTATTGTTTGTGTGGAGCACAACTTTGGCATTCACTTTAATTTGXXXXXXXXXXTGAACTTTGACAATGACTTATATGTGTTTCACTTTGTATGTCAAGTATCATAATATTCCTTAATCATAATGCAATCTATTAACATTGCCATAATTAGTGT
ATTAGTAAGTTGCAATTTAAACATGTTTATTTAGTGTGTTTCACTTTAGAATCTATTTATTGTTTGTGTGGAGCACAACTTTGGCATTCACTTTAATTTGXXXXXXXXXXTGAACTTTGACAATGACTTATACGTGTTTCACTTTGTATGTCAAGTATCATAATATTCCTTAATCATAATGCAATCTATTAACATTGCCATAATTAGTGT
* *
>Marker309145
GTTGGCCGTCAATTCACGCCTGCTTGAAGCTACAGTGGCAGCGCTCGACCGAGATTTCTTAGGCACAGCAGCCCTAACGTCTGTAGACAGAAATCTACTCXXXXXXXXXXATATTTTCTATTTACAGCCATATACACATAAAATATACTGCATATTTTCTACTCAGAAAACCTAACATACACACAATTTAAGGTCTATTTAGTGTGTATT
TTTGGCCGTCAATTCACGCCTGCTTGAAGCTACAGTGGCAGCGCTCGACCGAGATTTCTTAGGCACAGCAGCCCTAACGTCTGTAGACAGAAATCTACTCXXXXXXXXXXATATTTTCTATTTACAGCCATATACACATAAAATATACTGCATATTTTCTACTCAGAAAACCTAACATACACACAATTTAAGGTCTATTTAGTGTGTATT
*
>Marker236234
TATAATGCATTGGTGGAGAATATACCTTGCTTGAATGTTCCTCTGAAAAAGATGACTATTGAACAATGCATGACTAGAAAAAAATAGGCGGAGAAATCACXXXXXXXXXXCTTCACCAAGGGCTGTTTTTCTTAAAACAAAGGTAACTCTCTAAATAATTGTTGCTGGGTTGGTGTAGTTCACTTGCTTCAGTAAAAGATAAGTGTTTTG
TATAATGCTTTGGTGGAGAATATACCTTGCTTGAATGTTCCTCTGAAAAAGATGACTATTGAACAATGCATGACTAGAAAAAAATAGGCGGAGAAATCACXXXXXXXXXXCTTCACCAAGGGCTGTTTTTCTTAAAACAAAGGTAACTCTCTAAATATTTGTTGCTGGGTTGGTGTAGTTCACTTGCTTCAGTAAAAGATAAGTGTTTTG
* *
>Marker193378
AGAGAATTTCAAAACTCCTAGGTATGTAAGACTGAATAACTCTGAAGACCAGATCATAGGAGATAAAAGCAAAGGTGTTCAAACAAGAAGAAATATTGCTXXXXXXXXXXCTCAAGTAAAAAGAATTGCCTTTGAAGAAACGTTTGCTCTGGTAGCAAGGATTGAAGCAATCAGATCATTTCTTGCCTTTGCTGCCTTTAAAGATTTCAA
AGAGAATTTCAAAACTCCTAGGTATGTAAGACTGAATAACTCTGAAGACCAGATCATAGGAGATAAAAGCAAAGGTGTTCAAACAAGAAGAAATATTGCTXXXXXXXXXXCTCAAGTAAAAAGAATTGCCTTTGAAGAAATGTTTGCTCTGGTAGCAAGGATTGAAGCAATCAGATCATTTCTTGCCTTTGCTGCCTTTAAAGATTTCAA
*
>Marker379726
TGAATTGTAAACTTGCTTTCGAATATGACTGCATTAATTTTCCAAACAGCTTTGAATGCTGTTGGAAAACATCCTTCATCACACCGAATTTCAATTCCAAXXXXXXXXXXGAAATGCTAGATTGGATCCACTAGATGCTCAAATTGTCAAACATCTTCTAAAAACATTTTCCATTTGTTCATCCATCATAATATGCCAAGATTATATGGG
TGAATTGTAAACTTGCTTTCGAATATGACTGCATTAATTTTCCAAACAGCTTTGAATGCTGTTGGAAAACATCCTTCATCACACCGAATTTCAATTCCAAXXXXXXXXXXGAAATGCTAGATTGGATCCACTAGATGCTCAAATTGTCAAACATTGTCCAAAAACATTTTCCATTTGTTCATCCATCATAATATGCCAAGATTATATGGG
** *
>Marker231827
GTGTGTATTATCTCTGGCTTTCTCTCCAGGAGATAAATAATTGCATGGAAAATACTCTGTTAATTTCATTCTACACTGTGGTTTAAAGGATAGTCATGTAXXXXXXXXXXATCTTATAGGAATCGGTCATTTCCTTGGTATATTTTCATTGAGAACCTTATGTTTTATAACATCCTAAACAAGTTCAAAATATATTTAGATGTTGTAAAG
GTGTGTATTATCTCTGGCTTTCTCTCAAGGAGATAAATAATTGCATGGAAAATACTCTGTTAATTTCATTCTGCACTGTGGTTTAAAGGATAGTCATGTAXXXXXXXXXXATCTTATAGGAATCGGTCATTTCCTTGGTATATTTTCATTGAGAATCTTATGTTTTATAACATCCTAAACAAGTTCAGAATATATTTAGATGTTGTAAAG
* * * *
>Marker168276
AGAACCATGTCTTGACTAATTATGTTGCTTAAA-TTTTTTTTTACAACATTCATGCTATATTATGAACTTAGTGTCAAGCTATGTAGACCAACCCTTAATTXXXXXXXXXXATATTTCCTTTGGTCTTAATCCCTATTTAAAATATTCCTAGAAAAGATTTATTGTGTCTTATTAGTGTTAAGGCTCTTGTAAGTAGAGTTCTCTTTATTT
AGAACCATGTCTTGACTAATTATGTTGCTTAAATTTTTTTTTTACAACATTCATGCTATATTATGAACTTAGTGTCAAGCTATGTAGACCAACCCTTAA-TXXXXXXXXXXATATTTCCTTTGGTCTTAATCCCTATTTAAAATATTCCTAGAAAAGATTTATTGTGTCTTATTAGTGTTAAGGCTCTTGTAAGTAGAGTTCTCTTTATTT
>Marker292546
CTTGATTTTATATGTATGCATGGTTATCTTTTGTTTATCACCTGATGCATGTATTATTTTCTCCTCACATGATGATATCCTTGATAGTTACTGCATGCTT--XXXXXXXXXXCTTGGTTGAAGTCCTTTCACACTTTTTTCTTGGTCAAAACCCTTCTACATTTTCCCACTTAGTCGAAGTGATACTACTTTCCACTCATTCAGAATCTTAC
CTTGATTTTATATGTATGCATGGTTATCTTTTGTTTATCACCTGATGCA--TATTATTTTCTCCTCACATGATGATATCCTTGATAGTTACTGCATGCTTATXXXXXXXXXXCTTGGTTGAAGTCCTTTCACACTTTTTTCTTGGTCAAAGCCCTTCTACATTTTCCCACTTAGTCGAAGAGATACTACTTTCCACTCATTCAGAATCTTAC
* *
>Marker412848
AAGCATCCGAAAAACAACACTGATGAATACTAGGCAATGTCCAATAATGGAAAAGGGCAATCAAGCTTCATACTAAATTTAACCCAGCAAAGAGTTGTATXXXXXXXXXX-TATACCCTTGAAGCAATTTATGTTTTATATTAGAATTATTGTAGATAAATTGATTGCATTTTAAGTAGAAAGGGGTGAAATGGACTAATGAGCTGAATTT
AAGCATCCGAAAAACAACACTGATGAATACTAGGCAATGTCCAATAATGGAAAAGGGCAATCAAGCTTCATACTAAATTTAACCCAGCAAAGAGTTGTATXXXXXXXXXXATATATCCTTGAAGCAATTTATG-TTTATATTAGAATTATTGTAGATAAATTGATTGCATTTTAAGTAGAAAGGGGTGAAATAGACTAATGAGCTGAATTT
* *
>Marker434841
AATCCCTCCACGCATAACCCATTTTTAGGGACATAGCTTGAGTATCTTAAAGAGCCTCTAGATCTCAACCTTTGTAATGTCACATTGCCACATTCTCTCCXXXXXXXXXXTAAAAATAGGAATTCAAGAATTCCTAGTCAAACAAGAATTTAATGAATCAATTGCACACTTCATCACATGTTGGAGACAAGTCATCTACTCTTCGACTAG
AATCCCTCCACGCATAACCCATTTTTAGGGACATAGCTTGAGTATCTTAAAGAGCCTCTAGATCTCAACCTTTGTAATGTCACATTGCCACATCCTCTCCXXXXXXXXXXTAAAAATAGGAATTCAAGAATTCTTAGTGAAACAAGAATTTAATGAATCAATTGCACACTTCATCACATGTTGGAGACAAGTCATCTACTCTTCGACTAG
* * *
>Marker257832
AAGAGACCTTATATATAAAGGCAAGGTAGAGGAGGTGAGATGGTAGGACTGAAAGACTGATTGCCCCTCCAAAGATGTGACACATGTGGACTCACATGAGXXXXXXXXXXTAGTTGTTGGAGTCTTAAACCCCTTATTGGCAATTGTCAATATATTAACCAACCCTTCCCAATATGGGTTGTTTTGCCACATTGAAGGGTAAATTATTGT
AAGAGACCTTATATATAAAGGCAAGGTAGAGGAGGTGAGATGGTAGGACTGAAAGACTGACTGCCCCTCCAAAGATGTGACACATGTGGACTCACATGAGXXXXXXXXXXTAGTTGTTGGAGTCTTAAACCCCTTATTGGCAATTGTCAATATATTAACCAACCCTTCCCAATATGGGTTGTTTTGCCACATTGAAGGGTAAATTATTGT
*
>Marker319558
TTTGTCTACGAGATACATATTATCTTTATGCAAGGATTGTGTTGCAAACTCTGGGTAGCACATTAACTCAATAGTATTAGTTCTTGTTGGTGATTGGAAAXXXXXXXXXXTCTTGGAAATTCACTAGAGAGACAAGATGAGTGTCAAATATGAAACAATCAAAGAATAGTAAGTTAATTAACTAGCATACAACATAATATGTCAGTATAT
TTTGTCTACGAGATACATATTATCTTTATGCAAGGATTGTGTTGCAAACTTTGGGTAGCACATTAACTCAATAGTATTAGTTCTTGTTGGTGATTGGAAAXXXXXXXXXXTCTTGGAAATTCACTAGAGAGACAAGATGAGTGTCAAATATGAAACAATCAAAGAATAGTAAGTTAATTAACTAGCATACAACATAATATGTCAGTATAT
*
>Marker553080
AAAGAACATACATAATGATCTACAAACCTATAAACTAAACTGCTACATACTCTCTCTCCACTAATCTCCATAGCTCTCCCAAGTTCTCCACTTCATAAAAXXXXXXXXXXCATATCAATACACAAGCTAGGATGTAAGCCCCTCTAACTGAAGGAAGATCAAACAAAACATTTATTCCCAAAACTAGGGAATATCCCCAAAACCATCCCT
AAAGAACATACATAATGATCTACAAACCTATAAACTAAACTACTACATACTCTCTCTCCACTGATCTCCATAGCTCTCCCAAGTTCTCCACTTCATAAAAXXXXXXXXXXCATATCAATACACAAGCTAGGATGTAAGCCCCTCTAACTGAAGGAAGATCAAACAAAACATCTATTCCCAAAACTAGGGAATATCCCCAAAACCATCCCT
* * *
>Marker320470
TTCAAGTGCACACCTTGCATGTTACTGTAATGTCCCCATTTTGAGCCAAGTTATATTTTCTAGTTTGAGTTTATTTCTATACATGGAGAACCGGAAAGTTXXXXXXXXXXTGCCTATTTCAAATGGATCGACTATCATGTGGAGTGCAAAATCATTGAATATTGGTCCCTTGAATTCCAACGCCCATTAGGAGTTCGCTCAAAATAAAAG
TTCAAGTGCATACCTTGCATGTTACTGTAATGTCCCCATTTTGAGCCAAGTTATATTTTCTAGTTTGAGTTTATTTCTATACATGGAGAACCGGAAAGTTXXXXXXXXXXTGCCTATTTCAAATGGATCGACTATCATGTGGAGTGCAAAATCATTGAATATTGGTCCCTTGAATTCCAACGCCCATTAGGAGTTCGCTCAAAATAAAAG
*
>Marker196979
CCTCACTGAGACCTACAACATGTGAACAGATTTCACATAAATAAGCTAGGCAAGGTAAGGCAATTGTCTCAGGCATAGATAAGGCATAGATATCACAATGXXXXXXXXXXTGACAGGCCCAGATCCAGAATAACTGAAAGATTCAGTAGAAATGGTCAGGACTTGATTTGGGCAGACTATGGCGCCCATTATGTCAAGGTCCGGAAGGTA
CCTCACTGAGACCTACAACATGTGAACAGATTTCACATAAATAGGCTAGGCATGGTAAGGCAATTGTCTCAGGCATAGATAAGGCATAGATATCACAATGXXXXXXXXXXTGACAGGCCCAGATCCAGAATAACTGAAAGATTCAGTAGAAATGGTCAGGACTTGATTTGGGCAGACTATGGCGCCCATTATGTCAAGGTCCGGAAGGTA
* *
>Marker581567
AAGTTACTAACCTTTGTAAGGTTAGGGTTGCTATCAAGAACTAATTTCAACCCATCATCAGTAACCCTCAAACATTCCACTAAACTCAGACACTGCAAATXXXXXXXXXXTATGCCTCTTTCTACTTGGTCACTATTGTTGCCATCAGTAAAGGCCATACCTGGACCGCATAGTGTATGTTCTGCAATGTCTACTTTCTCACACCTTTGA
AAGTTACTAACCTTTGTAAGGTTAGGGTTGCTATCAAGAACTAATTTCAACCCATCATCAGTAACCCTCAAACATTCCACTAAACTCAGACACTGCAAATXXXXXXXXXXTATGCCTTTTTCTACTTGGTCACTATTGTTGGCATCAGTAAAGGCCATACCTGGACCGCATAGTGTATGTTCTGCAATGTCTACTTTCTCACACCTTTGA
* *
>Marker155311
AAATGGAATTTCTAATAGAAAAAGTAGAAATACTAGCTGGAAAGGTTGATTTTAGTATGAGTTCATTCAAATGCCTCTCAGAGTAGGCTGCAAACAATCCXXXXXXXXXXCTTTTACCATAAAGAAATAAGTCAAGATTTCTAGAGAATATCAGATAAAGATATATGTTCATGTGCCAACCAAGTTCCATGTGTAGAAACAATAAAGAGG
AAATGGACTTTCTAATAGAAAAAGTAGAAATACTAGCTGGAAAGGTTGATTTTAGTATGAGTTCATTCAAATGCCTCTCAGAGTAGGCTGCAAACAATCCXXXXXXXXXXCTTTTACCATAAAGAAATAAGTCAAGATTTCTAGAGAATATCAGATAAAGATATATGTTCATGTGCCAACCAAGGTCCATGTGTAGAAACAATAAAGAGG
AAATGGACTTTCTAATAGAAAAAGTAGAAATACTAGCTGGAAAGGTTGATTTTAGTATGAGTTCATTCAAATGCCTCTCAGAGTAGGCTGCAAACAATCCXXXXXXXXXXCTTTTACCATAAAGAAATAAGTCAAGATTTCTAGAGAATATCAGATAAAGATATATGTTCATGTGCCAACCAAGTTCCATGTGTAGAAACAATAAAGAGG
* *
>Marker390030
AGTCATTTTATCATGGGTGCATCACCTGCTAGGTTCTTTTCATCTTAGTTTCAATTATTCTATCCTTTTTCCTACAAAAGCAGCAATCTTTTAGGATGTCXXXXXXXXXXGGTGGTAAATAGGTAGTAGATATAGTAGGGCCTATGAAGGGTAATTAGGGTAATGACTATGAGGTTATAGGTTATAAAAGAAGGGGTTGTGAAGTGCCAA
AGTCATTTTATCATGGGTGCATCACCTGCTAGGTTCTTTTCATCTTAGTTTCAATTATTCTATCCTTTTTCCTACAAAAGCAGCAATCTTTTAGGATGTCXXXXXXXXXXGGTGGTAAATAGGTAGTAGATATAGTAGGGCCTATGAAGGGTAATTAGGGTAATGACTATGAGGTTATAGGTTATAAAAGTAGGGGTTGTGAAGTGCCAA
*
>Marker242231
TTTGAAAAAATGTCAAAATCTAATATTACATTCATTTGGAGACATATATCATGTCTACTTCTTTGGAAAAATTGTTTGCATACATCATAGACATGGATCAXXXXXXXXXXTGAAGCCTTGGATGATTTTATGGGAAATTCTACTATGGCACCTATTGATAAAACATGTGATGATAACTTTGGTTTACCTTATGATCCCTCTCCAAAGGTT
TTTGGAAAAATGTCAAAATCTAATTTTACATTCATTTGGAGACATATATCATGTCTACTTCTTTGGAAAAATTGTTTGCATACATCATAGACATGGATCAXXXXXXXXXXTGAAGCCTTGGATGATTTTATGGGAAATTCTACTATGGCACCTATTGATAAAACATGTGATGATAACTTTGGTTTACCTTATGATCCCTCTCCAAAGGTT
* *
>Marker186193
AAGATAGGAGGTGTAGCTAGATATTCTTTGAGCTGATCAAATGCTACTTGACACTTATTGTCCCATCAAAATGAGACATCCTTTCAGAGCAAGTGTTGAGXXXXXXXXXXTATTTTGCTAGTATGTCATCCACATAGTCCTCTATGTCATTGCTCTTTGATAAGTTGCCCCTACATTCTTTAGACCAAACGGCATGATGCACCAACAATA
AAGATAGGAGGTGTAGCTAGATATTCTTTGAGCTGATCAAATGCTGCTTGACACTTATTGTCCCATCAAAATGAGACATCCTTTCAGAGCAAGTGTTGAGXXXXXXXXXXTATTTTGCTTGTATGTCATCCACATAGTCCTCTATGTCATTGCTCTTTGATAAGTTGCCCCTACATTCTTTAGACCAAACGGCATGATGCACCAACAATA
* *
>Marker279655
ATATACCTTTACTATCTTGTTTGTATCTCAATATGGGATCAATTAGATTTATTTTTCTTCTAAACTTGATCAAAAAGAACTTTTCATTACCTTTCCAATCXXXXXXXXXXACATATGATGCAAGAAGAGATTTCAAGAGGATATAAACTCACCATTTCTCACACATGCTTTGAAGAAAAAAATTATTGATTTAGGCCATATGACTCTACA
ATATACATTTACTATCTTGTTTGTATCTCAATATGGGATCAATTAGATTTATTTTTCTCCTAAACTTGATCAAAAATAACTTTTCATTACCTTTCCAATCXXXXXXXXXXACATATGATGCAAGAAGAGATTTCAAGAGGATATAAACCCACCATTTCTCACACATGCTTTGAAGAAAAAAATTATTGATTTAGGCCAGATGACTCTACA
* * * * *
>Marker219682
ATGTATCTATAGGGTGCATAATTGATTGACATTACATCACAACAATACATCCTTGGGCTATGCAATAATTTTACAATAAATAACAATAAAATATACAATTXXXXXXXXXXCTATTATAAATAAAGCAACTAAACTAGATGCTTACACAAAAGAAACAAATTGATTTAATGCTAGAAAATAAGTAACTGTATATGGGATTTAGAAAAATGA
ATGTATCCATAGGGTGCATAATTGATTGACATTACATCACAACAATACATACTTGGGCTATGCCATAATTTTGCAATAAATAATAATAAAATATACAATTXXXXXXXXXXCTATTATAAATAAAGCAACTAAACTAGATGCTTACACAAAAGAAACAAATTGATTTAATGCTAGAAAATAAGTAACTGTATATGGGATTTAGAAAAATGA
* * * * *
>Marker135520
TAAGAAAACAATATCATCATTTTCCAACAAAAAATTCCCTAAAGTATTTATTAACTATACAAACCAAGAACCTCATTCCACATAAAAGCATGGGTCTACAXXXXXXXXXXATGTGGGTAGATTACAATATAATAAATAAATTTCTGTGATCATAATTATAAATTTACATACATGGACTCAAACGTTTTGAATTATACATTTTCATTAAAG
TAAGAAAACAATATCATCATTTTCCAACAAAAAATTCCCTAAAGTATTTATTAACTATACAAACCAAGAACCTCATTCCACATAAAAGCATGGGTCTACAXXXXXXXXXXATGTGGGTAGATTACAATATAATAAATAAATTTCTGTGATCATAATTATAAATTTACATACATGGACTCAAACATTTTGAATTATACATTTTCATTAAAG
*
>Marker369455
ACTATGAACACAATGACATGTTTAAAACTGAACATGTTTATGCCCAAGTAGATCAATTCCTATTCCAAAACATAGATGATATCCTTATGCACCTCGTAGAXXXXXXXXXXCTTAGCCTCTCATATAGGCCCTTCATCACCCAAACATTCATAGCTCCATCAATAATCCAATCAACAACCCAACTTTATCCTACCATCATCGCCACTTCAA
ACTATGAACACAATGACATGTTTAAAACTGAACATGTTTATGCCCAAGTAGATCAATTCCTATTCCAAAACATACATGATATCCTTATGCACCTCGTAGAXXXXXXXXXXCTTAGCCTCTCATATAGGCCCTTCATCACCCAAACATTCATAGCTCCATCAATAATCCAATCAACAACCCAACTTTATCCTACCATCATCGCCACTTCAA
*
>Marker209244
TTATAAGTTGAGTGCAATATTATGCCCAATGGATTCATTCTCTAAAAAACACATACATGGAAAAGCAACCTCAGGGATATGAAGGGAACAATGTTTTACAXXXXXXXXXXAAGGTATCAATAGGAAGAAGCTAAAGCTTTGCAATCTTCAAACAGGTTATTCTGCCTCTCCTATGCAGGGGTTACATGGACAAGGGTAGCCATGAAAGCT
TTATAAGTTGAGTGCAATATTATGCCCAACGGATTCATTCTCTAAAAAACACATACATGGAAAAGCAACCTCAGGGATATGAAGGGAACAATGTTTTACAXXXXXXXXXXAAGGTATCAATAGGAAGAAGCTAAAGCTTTGCAATCTTCAAACAGGTTATTCTGCCTCTCCTATGCAGGGGTTACATGGACAAGGGCAGCCATGAAAGCT
* *
>Marker334444
ACTGTAATATGCTATTTGAGCCTTCCATAAACCCCAATCACACCACAAAAAAGTTTCACTTTGATTTAACATTTCTCCAGAAACTTAAACGTAGATGCATXXXXXXXXXXGTTGCCAAGGTCAATAACAACTTGCTATGCTCTGCCATTGATTAATTACAGCTTAGAAGAAAATTGTGCACCTACTTTGGTGTCTCCATTTACTCATGCT
ACTGTAATATGCTATTTGAGCCTTCCATAAACCCCAATCACACCACAAAAAAGTTTCACTTTGATTTAACATTTCTCCAGAAACTTAAAAGTAGATGCATXXXXXXXXXXGTTGCCAAGGTCAATAACAACTTGCTATGCTCTGCCATTGATTAATTACAGCTTAGAAGAAAATTGTGCACCTACTTTGGTGTCTCCATTTACTCATGCT
*
>Marker587210
ACCACCTTCATTTGTCCAAGCATGTTGTCAATGCACTCATACACTTTTCTAAGGTTTGAAGCATTAAAGTCCCCAAATCTGATGAGGAACTTGTGGCTATXXXXXXXXXXTTTTTATCTTATTCTGAGAAGGGTCTGCATTACAACAAGGTTGAATGCACCATTGATTACATCATCTAATCTCTAAAGTATGCTTGCCCAACAAAGCAGT
ACCACCTTCATTTGTCCAAGCATGTTGTCAATGCACTCATACACTTTTTTAAGGTTTGAAGCATTGAAGTCCCCAAATCTGATGAGGAACTTGTGGCTATXXXXXXXXXXTTTTTATCTTATTCTGAGAAGGGTCTGCATTACAACAAGGTTGAATGCACCATTGATTACATCATCTAATCTCTAAAGTATGCTTGCCCAACAAAGCAGT
* *
>Marker190373
TGGATGCCCATGAGAGAGATGAGAGATAATTATTTAATTATTATTAGTCTTCAAGACTTTAAATATTATTATAATGGCATTAACAAGGAAGGTTACAGTTXXXXXXXXXXGGCAGCCACTTGTTTTAGGAAACCATTTGTGATTTATTATTTCTTATTCCTCTATAAATTAGATGTATTGGATATAGGTTTCATAGTGTGTCATAGGTTA
TGGATGCCCATGAGAGAGATGAGAGATAATTATTTAATTATTATTAGTCTTCAAGACTTTAAATATTATTATAATGGCATTAACAAGGGAGGTTACAGTTXXXXXXXXXXGGCGGCCACTTGTTTTAGGAAACCATTTGTGATTTATTATTTCTTATTCCTCTATAAATTAGATGTATTGGATATAGGTTTCATAGTGTGTCATAGGTTA
* *
>Marker301358
TTTAAGTGAATGTTAGTCTTATGTCTCCAAGATCGAAGTAAAATTGAAGATATAGAAAGAATTCACTTCTTTTTTTATCTATATTATCTGGGAGTTTCATXXXXXXXXXXATCAAGAGGATAAGTGGTGCAATAACACTACACAAGAATTCACAATAATTCCAAATGTTTTTCACAACAAATATATGATTATGTAGTCTATATCAAGTTG
TTTAAGTGAATGTTAGTGTTATGTCTCCAAGATCGAAGTAAAATTGAAGATATAGAAAGAATTCACTTTTTTTTTTATCTATATTATCTGGAAGTTTCATXXXXXXXXXXATCAAGAGGATAAGTGGTGCAATAACACTACACAAGAATCCACAATAATTCCAAATGTTATTCACAACAAATATATGATTATGTAGTCTATATCAAGTTG
* * * * *
>Marker532507
CTCGCTCTTGTGGGTAATATTGAGCATGCTAGCATCATTCATCACTTCCTTAAAGTCACATTAGTTGAACTTCCTCCTTCGGTAAATATTGGTCATCCTTXXXXXXXXXXATATAATGTCCATGGTGATGCATTGCACCATGTGAGATCATTCTCTACCATATTCTTGGCTCATACCTATGAGGACTATGTATTGGCCAAATTCTTTCCT
CTCGCTCTTGTGGGTAATATTGAGCATGCTAGCATCATTCATCACTTCCTTAAAGTCACATTAGTTGAACTTCCTCCTTTGGTAGATATTGGTCATCCTTXXXXXXXXXXATATAATGTCCATGGTGATGCATTGCACCATGTGAGATAATTCTCCACCATATTCTTGGCTCATACCTATGAGGACTATGTATTGGCCAAATTCTTTCCT
* * * *
>Marker414446
TAAGATGATTACACATGGATGATAATGATGATGCAGTTTGTTTTTGTTAGATATTTTTTATTTTATATTGTATGCAATGTGTATGGATGCATTTGATTCAXXXXXXXXXXACAATTCCCAAACTTAGCTTTGTAAAAGGCTAAATATTGATCCTTATCTAGACAAAAACAAATTGACAAGATTTCATCTTAGACAAGCAACAAATTTATT
TAAGATGATTACACATGGATGATAATGATGATGCAGTTTGTTTTTGTTAGATATTTTTTATTTTATATTGTATGCAATGTGTATGGATGCATTTGATTCAXXXXXXXXXXACAATTCCCAAACTTAGCTTTGTAAAAGGCTAAATATTGATCCTTATCTAGACAAAAACAAATTAACAAGATTTCATCTTAGACAAGCAACAAATTTATT
*
>Marker398682
AGATTTGGGGCCCTATGGCTAGCAAAGTTTTGTATAGAAGAAGTGTGACTTTCAAAGAAATTAAACCTTCACCCATTATATTGTAGTCAAAAGAGAATGTXXXXXXXXXXGAACTATGAAGGAAGTGATGGATATGAGTGATTCTAAGTCCTTGAGAGTGGCTATGGATGAGAAGATGGATGTATTAAGGAATAATGACACATAAGACTT
AGATTTGGGGCCCTATGGCTAGCAAAGTTTTGTATAGAAGAAGTGTGACTTTCAAAGAAATTAAACCTTCACCCATTATATTGTAGTCAAAAGAGAATGTXXXXXXXXXXGAACTATGAAGGAAGTGATGGATATGAGTGATTCTAAGTCCTTGAGAGTGGCTATGGATGAGAAGATGGATGTATTAAGGAATAATGACACATGAGACTT
*
>Marker576388
TCTGTCTGTATTTTTTGTTCTTAAAGATGTATCATTTGCATATACATATGAACATATGGAAAAGTAACAAACATGTTCCCTTTTGGTGCACCTTTTTACCXXXXXXXXXXACACATATTTTCATAGATTAGATATTGGATCACCCAATTATTCCACTTTAGTAATACTTTTTATAGATTCAAAGGACATTGCTTTTGGTCATTGCTCCAA
TCTGTTTGTATTTTTTGTTCTTAAAGATATATCATTTGCATATACATATGAACATATGGAAAAGTAACAAACATGTTCCCTTTTGGTGCACCTTTTTACCXXXXXXXXXXACACATATTTTCATAGATTAGATATTGGATCACCCAATTATTCCACTTTAGTAATACTTTTTATAGATTCAAAGGACATTGCTTTTGGTCATTGCTCCAA
* *
>Marker583927
TCTGCCCTTTCAATTTATAAACTTGGGAAGGGGCATACAGAGGAGTTATCTGAAGATATGCATGATCTGCAAGATCTGCACGAAGGGAAGGTTTGCACCCXXXXXXXXXXTGTTAACTGATGCTACACCTTAACTAAAATTGAAACTCAGTCTTTGTTAACTGATGTTGCATGCTAACTGGAAGTGTTATTACTGAAAAAAACTATCCGA
TCTGCCCTTTCAATTTATAAACTTGGGAAGGGGCATACAGAGGAGTTATCTGAAGATATGCATGATCTGCAAGATCTGCACGAAGGGAAGGTTTGCACCCXXXXXXXXXXTGTCAACTGATACTACACCTTAACTAGAATTGAAACTCAGTCTTTGTTAACTGATGTTGCATGCTAACTGGAAGTGTTATTACTGAAGAAGACTATCCGA
* * * * *
>Marker149753
TTGCGACTATGCATAGATTATCGTATGCTAAATAACACAATGCTAAAGAACAAGTATCCATTTCCCCACATTGACAATCTCTTTGATCAAATGTGAGGGGXXXXXXXXXXACACAATGATTTTGACATAGAAAACCCTGTTAAGGGAAAAACCATGGGGTGACTAACCCAAGATTGTATTCTCTGTTAAAAGAATAAGATAGTGTAGAAT
TTGCGACTATGCATAGATTATCATATGCTAAATAACACAATGCTAAAGAACAAGTATCCATTTCCCCACATTGACAATCTCTTTGATCAAATGTGAGGGGXXXXXXXXXXACACAATGATTTTGACATAGAAAACCCTGTTAAGGGAAAAACCATGGGGTGACTAACCCAAGATTGTATTCTCTGTTAAAAGAATAAGATAGTGTAGAAT
*
>Marker490811
TTGATTCTATGAATAGAGATTATTGTATAATACCAGGGCCGCGTCACTATGCTTGCATGGTTGATCTTCTTGGTCGTTCTGGGCTTTTGAACGAGGCAGAXXXXXXXXXXAGATGCATACATTTGTAACTGGAGATAGAACACATCCTCAAGCAAGAAAGATATATGCAACTCTAGAATGGTTGGGCTGGCAAATGAAAGACTTAGGGTA
TTGATTCTATGAGTAGAGATTATTGTATAATACCAGGGCCGCGTCACTATGCTTGCATGGTTGATCTTCTTGGTCGTTCTGGGCTTTTGAACGAGGCAGAXXXXXXXXXXAGATGCATACATTTGTAACTGGAGATAGAACACATCCTCAAGCAAGAAAGATATATGCAACTCTAGAATGGTTGGGCTGGCAAATGAAAGACTTAGGGTA
*
>Marker441624
CATACTTTTAGCATCAGCAACATTACCACACCTACAAGGTCCTATTTGTATAGAAAAATCAACTCCCAACTTATGCCTTTTCCTGCAATAACTATGAGCAXXXXXXXXXXTTTGTAATGTTTCATATTTTCCTTGAATTCTAATTGTGGATATTTTCTGAAGAAGCAACCATTTACTTGAACTTTATCCAATCCATTGAATGATTGAGCT
CATACTTTTAGCATCAGCAACATTACCACACCTACAAGGTCCTATTTGTATAGAAAAATCAACTTCCAACTTATGCCTTTTCCTGCAATAACTATGAGCAXXXXXXXXXXTTTGTAATGTTTCATATTTTCCTTGAATTCTAATTGTGGATATTTTCTGAAGAAGCAACCATTTACTTGAACTTTATCCAATCCATTGAATGATTGAGCT
*
>Marker172320
TTGGAGGCCATGTCGAATGACATCAAGCAGTCTATTTACTTACAATCCTTAAATAGAATAATAGAAAAGTTAACAATACATTTATAGCATTGGTCCCCAAXXXXXXXXXXTATGATAGGGTTTCTTGGGAATTTTTGTTCAAATTCCTCGAGAAGATTGGCTTCCATGACAAATCTCTACATCTTATCAAAGCATGTATCACCACTGTGA
TTGGAGGCCATGTCGAATGACATCAAGCAGTCTATTTACTTACAATCCTTAAATAGAATAATAGAAAAGTTAACAATACATTTATAGCATTGGTCCCCAAXXXXXXXXXXTATGATAGGGTTTCTTGGGAATTTTTGTTCGAATTCCTCGAGAAGATTGGCTTCCATGACAAATCTCTACATCTTATCAAAGCATGTATCACCACTGTGA
*
>Marker303692
TACTGTTATTGTTATATTATTATTATACAATTTTTTATACAATATATTTAAACAACATAACCTATATAGATAATTATATGTTTTCTCAAAACTTGTTAAAXXXXXXXXXXAAAGGGATCAAAGTGCACATGTCCCCAAAAATCCAAAAGATCAAACACAGCTGCACCAAGCAAGCTTGTGCACGGTAACCCCATATCCACTCACATCCCT
TACTGTTATTGTTATATTATTATTATACAATTTTTTATACAATATATTTAAACAACATAACCTATATAGATAATTATATATTTTCTCAAAACTTGTTAAAXXXXXXXXXXAAAGGGATCAAAGTGCACATGTCCCCAAAAATCCAAAAGATCAAACACAGCTGCACCAAGCAAGCTTGTGCACGGTAACCCCATATCCACTCACATCCCT
*
>Marker118011
CACACATATGACTATGCATGTAGTGATGCCTAAGAATTAGTTTATAGGATTTAATTAGCACTACATCACAAACTATTTCTTCTTGGAAGTGATAAATAGAXXXXXXXXXXTGTGAGGTTTTGACTTAGATATTGGGATATGCATCAATTATCCCATTTGAGGGTTTGACATTAGCATCTCCAAATTCTACTTGTTGTGAGCATGTTCTTA
CACACATATGACTATGCATGTAGCGATGCCTAAGAATTAGTTTATAGGATTTAATTAGCACTACATCACAAACTATTTCTTCTTGGAAGTGATAAATAGAXXXXXXXXXXTGTGAGGTTTTGACTTAGATATTGGGATTTGCATCAATTATCCCATTTGAGGGTTTGACATTAGCATCTCCAAATTCTACTTGTTGTGAGCATGTTCTTA
* *
>Marker253418
TGGATTGATTATTAGCCCAATTGTGTATCTAGTGAACTAATTGAAATTTGGGTAATGCAACCCCCACCCAATCTCGTCTAACGGGCACGAATTGAGGTTCXXXXXXXXXXCCCATGCACCCAACCTCAATTAAAAGGCATTAACTGAGGTTCTATAACTCCAAATTTCTACCTAGTTTAGTGCTAATTCTTTATCTACATGTCATATTTG
TGGATTGATTATTAGCCCAATTGTGTATCTAGTGAACTAATTGAAATTTGGGGTATGCAACCCCCACCCAATCTCATCTAACGGGCATGAATTGAGGTTCXXXXXXXXXXCCCATGCACCCAACCTCAATTAAAAGGCATTAACTGAGGTTCTATAACTCCAAATTTCTACCTAGTTTAGTGCTAATTCTTTATCTACATGTCATATTTG
** * *
>Marker333899
TTCAATATGAAATATTTAGGAGTTGCAAAATATATTTTTGGGTATGGAAATTAGCAAGGATTGGGTTAACAAAAAATTATGTTTAAATCAAAATAAGTATXXXXXXXXXXAAATCCTAGTAAAGAACATTGGACTTATGTAAAAAAGGTTTTCAGGTATATACATGGAACTTCTAACCATTATGTTTGTTATCATGGATCTAATGATGTG
TTCAATATGAAATATTTAGGAGTTGCAAAATATATTTTTGGGTATGGAAATTAGCAAGGATTGGGTTAACAAAAAATTATGTTTAAATCAAAATAAGTATXXXXXXXXXXAAATCCTAGTAAAGAACATTGGACTTATGTAAAAAAGGTTTTCAGGTATATACATGGAACTTCTAACCATTATGTTTGTTATCATGAATCTAATGATGTG
*
>Marker316997
ATACATCTTTTCAAAGTCCAACTTGATGATCAAGGCATCCTAAGAAAATTTTTGGGCCCATTCAATAGTCTTCCAAGCAAGGACTAGGTTGTGAAGAATTXXXXXXXXXXTCAATAGGTAAGCCATCCATACTAGGCCTTGTCTTAGCAACCATGCAATTAAGAGCTTCATCTAGTTCCTTAATATTTAAGAGTTTGTCAAGCTATTTCT
ATACATCTTTTCAAAGTCCAACTTGATGATCAAGGCATCCTAAGAAAATTTTTGGACCCATTCAATAGTCTTCCAAGCAAGGACCAGGTTGTGAAGAATTXXXXXXXXXXTCAATAGGTAAGCCATCCATACTAGGCCTTGTCTTAGCAACCATGCAATTAAGAGCTTCATCTAGTTCCTTAATATTTAAGAGTTTGTCAAGCTATTTCT
* *
>Marker515912
ATAGGGTAAAACAACTAGAATATCTTGAAGAATCTAATGCATTTATGAATTGACAGTTTGAAATTAAGTAACATACAGGAAATGAAGTGAGGGACAATTAXXXXXXXXXXTCAATACACTTGTTTTCTCCATTGGCTGATTGCCTGCATTGTAGATCCACCATTCCACCTTGCAGATGTCTGTAATTGTTCTGTGCATTTGAGTAGTTGT
ATAGGGTAAAACAACTAGAATATCTTGAAGAATCTAATGCATTTATGAATTGACAGTTTGAAATTAAGTAACATACAGGAAATGAAGTGAGGGACAATTAXXXXXXXXXXTCAATACACTTGTTTTCTCCATTGGCTGATTGCCTGCATTGTAGATCCACCATTCCACCTTGCAGATGTCTGTAATAGTTCTGTGCATTTGAGTAGTTGT
*
>Marker283785
TTTATGAATTTTTCGCATTTATTTCTTACTCCATAGGTTGATTGTAATGTTTTAATCTCGCACCAATGACATACCCTGATATTGCATTTTTGTTAATTTGXXXXXXXXXXTTCAACCACAAAGTGAGTGCGGTGTGTAGATTTGGGATTATAAAGTTAATTGGTAGTGTTGCATCTGTTCCATACACTCTAGTTCAAATGGAGTGAACTT
TTTATGAATTTTTCGCATTTATTTCTTACTCCATAGGTTGATTGTAATGTTTTAATCTCGCACCAATGACATACCCTGATATTGCATTTTTGTTAATTTGXXXXXXXXXXTTCAACCACAAAGTGAGTGCGGTGTGTAGATTTGGGATTATAAAGTTAATTGGTAGTGTTGCATCTGTTCCATACACTCTAGTTCAAATGGTGTGAACTT
*
>Marker399657
TCATCTATTTTGCATCGGCTAGGGTTTTGAGGCATTCCATGAACATAATTGAAGGTCTGATGTAAAATCAGTCATACCTGATTTGTAACCAGCTCTTGATXXXXXXXXXXAGCTAGTTCTAGTTCCATAGCCAATCTAAATTCAAAACCGATCCAAATTCACCTCTTTGGAAGTATGTTGAAATGATACAACCGGTTCCAGGTAGTGGGG
TCATCTATTTTGCATCGGCTAGGGTTTTGAGGCATTTCATGAACATAATTGAAGGTCTGATGTAAAATCAGTCATACCTGATTTGTAACCAGCTCTTGATXXXXXXXXXXAGCTAGTTCTAGTTCCATAGCCAATCTAAATTCAAAACCGATCCAAATTCACCTCTTTGGAAGTATGTTGAAATGATACAACCGGTTCCAGGTAGTGGGG
*
>Marker295172
ACAATTTTATCTGTCAGGGGCATGCCCCTTCATCTCTTTGTTGACTGGGCAATATTCCTCATTGTTGGTAGCTATATTAGCTTACTGATTATCTTTATTGXXXXXXXXXXTACTGGTTAGGGCCCTCATGCTTAGTGAATTTGGCATTACATACCTACATACCATTCGATGCAATCTTCTCTTCATTCAGAACAAGCATCTTTTGTTGCA
ACAATTTTATCTGTCAGGGGCATGCCCCTTCATCTCTTTGTTGACTGGGCAATATTCCTCATTGTTGGTAGCTATATTAGCTTATTGATTATCTTTATTGXXXXXXXXXXTACTGGTTAGGGCCCTCATGCTTAGTGAATTTGGCATTACATACCTACATACCATTCGATGCAATCTTCTCTTCATTTAGAACAAGCATCTTTTGTTGCA
* *
>Marker95600
TCCTTTGTATCCTAGATTGCCTACATACCCTGTATCCATGGGATCAAGGCATTTAACGATAAAGATGAGATGTAGTTCTGATTTGTGTTTTATTGATGCGXXXXXXXXXXGTTGGATTTTTTATTTTTTTGGAGATTTTGAAATGTTTTTACCTGTTTGGGTTTTTTAAAATGTTGGCAATAGATGATCATTTTGATAGCCTTTATGCTA
TCCTTTGTATCCTAGATTGCCTACATACCCTGTATCCACGGGATCAAGGCATTTAATGATAAAGATGAGATGTAGTTCTGATTTGTGTTTTATTGATGGGXXXXXXXXXXGTTGGATTTTTTATTTTTTTGGAGTTTTTGAAATGTTTTTACCTGTTTGGGTTTTTTAAAATGTTGGCAATAGATGATCATTTTGATAGCCTTTATGCTA
* * * *
>Marker142880
GCTGTCAGTATACTCACTAAAACGATTTGCAACAATATAGATTCCTCTATTACTAAAGACTTAGCACCATTCTCCTTAACATGCAATACCCACTATCTCTXXXXXXXXXXATTGTTTCAAGACAAAAAATAACCATGAGAGATGTAGAGATGTCAACCGTTTCCAACAGAAGAATAACTAGCATATTTATATTAAATATATTATATCTAA
GCTGTCAGTATACTCACTAAAACGATTTGCAACAATATAGATTCCTCTATTACTAAAGACTTAGCACCATTCTCCTTAACATGCAATACCCACTATCTCTXXXXXXXXXXATTGTTTCAAGACAAAAAATAACCATGAGAGATGTAGAGATGTCAACTGTTTCCAACAGAAGAATAACTAGCATATTTATATTAAATATATTATATCTAA
*
>Marker421208
TGGGAGCTTCCTGATAGTGCGGTGTTTCATTTGAAGTTTAGAATGGATTGATCATGGAGGTGCTCATGGATACTTGGAGACTTAGGTGAAGATAGAGTTCXXXXXXXXXXGGCAGGTTGTTGCAAGAAGGTGAGGTGACACAAGTAAACACCAAGCATCTATGGTCCATATGTAGGACAACAACAAAGGTAAGAGCCATGCTTTAGGAAT
TGGGAGCTTCCTGATAGTGCGGTGTTTCATTTGAAGTTTAGAATGGATTGATCATGGAGGTGCTCATGGATACTTGGAGACTTAGGTGAAGATAGAGTTCXXXXXXXXXXGGCAGGTTGTTGCAAGAAGGTGAGGTGACACAAGTAAACACCAAACATCTATGGTCCATATGTAGGACAACAACAAAGGTAAGAGCCATGCTTTAGGAAT
*
>Marker377242
TACCATGGCATAATTAGACTTCCAAGAACACTTGCATAAGGAACATGACATGTCTTTACTATCTTCTTGTGTCTTGGGACATTATTCTATAAATAGTTCTXXXXXXXXXXACTATGATAAGAAAATGTCCACCAACATGTTTAAAATATATGCAATGATGAGCTCAACATTATACAAATCCAAGTCCCAACACATAAACATCAAACTTTT
TACCATGGCATAATTAGACTTCCAAGAACACTTGCATAAGGAACATGACATGTCTTTACTATCTTCTTGTGTCTTGGGACATTGTTCTATAAATAGTTCTXXXXXXXXXXACTATGATAAGAAAATGTCCACCAACATGTTTAAAATATATGCAATGATGAGCTCAACATTATACAAATCCAAGTCCCAACACATAAACATCAAACTTTT
*
>Marker254339
GGCTGCGGGATTTTCTTTTGGATATATAGAGTATTATGCTCTATCCTATTTATTAATACAAGGGAAAGGTTGATATTGGGTCAATTATCTCTATGTGTTGXXXXXXXXXXTATAAGTTATATTTGGTCTTACTTATAGTGCATTAGGCATTGAGGGATTAATTTATTTTAATATTTTTAGAAAACACCTTTACTACTTTCAATTTAAAAG
AGCTGCGGGATTTTCTTTTGGATATATAGAGTATTATGCTCTATCCTATTTATTAATACAAGGGAAAGGTTGATATTGGGTCAATTATCTCTATGTGTTGXXXXXXXXXXTATAAGTTGTATTTGGTCTTACTTATAGTGCATTAGGCATTGAGGGATTAATTTATTTTAATATTTTTAGAAAACACCTTTACTACTTTCAATTTAAAAG
* *
>Marker252068
GAGCTTAAATGGAACTAACTCAAGCATGGTGAAGATGCTAATCTCTAGTTCAAGTATGTAATATTTATTATTTTGTAGATAGTGTGTTTCCTGTAGGCAGXXXXXXXXXXTGAAATATAAGAAGGATTTAAGTGTTTAAAGAAAAGAAAGTTTTGAGACAACTGATTCACCCCCCCTCTTAGTTGTCTATCCTAAATCTAACAAATCCTA
GAGCTTAAATGGAACTAACTCAAGCATGGTGAAGATGCTAATCTCTAGTTCAAGTATGTAATATTTATTATTTTGTAGACAGTGTGTTTCTTGTAGGCAGXXXXXXXXXXTGAAATATAAGAAGGATTTAAGTGTTTAAAGAAAAGAAAGTTTTGAGACAACTGATTCACCCCCCCTCTTAGTTGTCTATCCTAAATCTAACAAATCCTA
* *
>Marker466118
AACACTACCAATACCATACATAGACTGAAAATCTCCATTATCAATCCATTTTGTAGCAACTTTGGCACTTGGCAATTCATCTCTTCATTCTCCTTTAGGCXXXXXXXXXXTGAACTCCACTGTATATTCTTCCTTTGGATTCTTCAAAGGATTGAACGCATATCTCTTGTCATCCAAGTGACAAAGTTCTATGTGTTTGCTTGCCCATCA
AACACTACCAATACCATACATAGACTAAAAATCTCCATTATCAATCCATTTTGTAGCAACTTTGGCACTTGGCAATTCATCTCTTCATTCTCCTTTAGGCXXXXXXXXXXTGAACTCCACTGTATATTCTTCCTTTGGATTCTTCAAAGGATTGAACGCATATCTCTTGTCATCCAAGTGACAAAGTTCTATGTGTTTGCTTGCCCATCA
*
>Marker190667
TATTAGTGCAATTACTCCTTATTTAGGAAAGTAGGATGACTCCTAGGAAAACATTTTTGAACTACCATATTGTAGATAGCCTTTAGACACCACCTGAGTTXXXXXXXXXXTACACTTGATTGATCATGACAATGATAATGAGGCACCATGGAAAGTAAATGCTCAAGCATGTTAAATATTGCATGTCCTCATATAATCCTTAGTCCTTAA
TATTAGTGCAATTACTCCTTATTTAGGAAAGTAGGATGACTCCTAGGAAAACATTTTTGAACTACCATATCGTAGATAGCCTTCAGACACCACCTGAGTTXXXXXXXXXXTACACTTGATTGATCATGACAATGATAATGAGGCACCATGGAAAGTAAATGCTCAAGCATGTTAAATATTGCATGTCCTCATATAATCCTTAGTCCTTAA
* *
>Marker205249
ACAAAATCTGTCAACACTACATACAAGAATGAGATCCTCAGCAGGGGCCTTTTGCATCCATTTCAGCATCAAGCAAAGCACACAAACAAATATGCTGAAAXXXXXXXXXXATTTTTTATTACTCTAAGGATGGCGATAACAACAAAAAAAATCGAAGGTGTGAATGAAGTGGAGACCCAACTGTGAAGGCATAAACAAGGAAAAATTTGC
ACAAAATCTGTCAACACTACATACAAGAATGAGATCCTCAGCAGGGGCCTTTTGCATCCATTTCAGCATCAAGCAAAGCACACAAACAAATATGCTGAAAXXXXXXXXXXATTTTTTATTACTCTAAGGATGGCGATAACGACAAAAAAAATCGAAGGTGTGAATGAAGTGGAGACCCAACTGTGAAGGCATAAACAAGGAAAAATTTGC
*
>Marker452545
ACTGTGATCCTCAGAAAGTAACTTGGATGGCGTCTCAATTGTGGCAAATTTGCCATTTCTACAACTTACAATTTGCATTCATTCAATGATTGACATAAACXXXXXXXXXXTTAGTATCTTCAATAATGTCAATCTCTGGCCCCATTAGTCACCAATATCAAATCATTGTATTGCTCACGAGGATCATGAATATCTCCTTTAATGTTGAAT
ACTGTGATCCTCAGAAAGTAACTTGGATGGCGTCTCAATTGTGGCAAATTTGCCATTTCTACAACTTACAATTTGCATTCATTCAATGATTGACATAAACXXXXXXXXXXTTAGTATCTTCAATAATGTCAATCTCTGGCCCCATTAGTCACCAATATCAAATTATTGTATTGCTCACGAGGATCATGAATATCTCCTTTAATGTTGAAT
*
>Marker322699
ATGAGAACATGAGGGATGAGAACATGACATATAGGCGCCCTTCATGGCGCCCTAGTATAAAAGGAAATGCTTAAACACTCCAAAGTGCGCCTCAAGGTTTXXXXXXXXXXCACAGAACATTTAAATAGCGCCTTGATGCAAGACACTCCCTTTGGCGCCTAAGACAAAAGATCTTTGATTTCATAAGTTTGAGTGTATCTTTGAAGTCCA
ATGAGAACATGAGGGATGACAACATGACATATAGGCGCCCTTCATGGCGCCCTAGTATAAAAGGAAATGCTTAAACACTCCAAAGTGCGCCTCAAGGTTTXXXXXXXXXXCACAGAACATTTAAATAGCGCCTTGATGCAAGACACTCCCTTTGGTGCCTAAGACAAAAGATCTTTGATTTCATAAGTTTGAGTGTATCTTTGAAGTCCA
* *
>Marker619670
AGGTTTTTTCACAGTGGTGTTTGCTTCAAAGAACAACAGAGATATGGTTTTGGCAAAGGGCCCTTGCGTCTGGAGAAATGCCTTGCTTTTTCTAAAACCCXXXXXXXXXXAAAGTGGACAGAAATATATGGAAGCAGCATCTTAACTATGAAAATCTAGCATTTCGATGTAGAAACTGTTTCAGTATGACATATGTCTGCTTCTTGTCCA
AGGTTTTTTCACAGTGGTGTTTGCTTCAAAGAACAACAGAGATATGGTTTTGGCAAAGGGCCCTTGCGTCTGGAGAAATGCCTTGCTTTTTTTAAAACCCXXXXXXXXXXAAAGTGGACAGAAATATATGGAAGCAGCATCTTAACTATGAAAATCTAGCATTTCGATGTAGAAACTGTTTCAGTATGACATATGTCTGCTTCTTGTCCA
*
>Marker458855
TTGAAATATCTAAGGCAATGATTGAGATAATTGTAAATTATTCTTTGGATTTTAATTTTTGTTAACATTGTATCTATAGGAAACTAGATCTTATGGCATTXXXXXXXXXXGATGGTGGAGAATTATGTTTAGTAGAGTGATTTTTTTGTAAGGACAATGGCATAGAAAGATAGAAGACAAATCCATATTTTTAGGAAAATGCCTACATTA
TTGAAATATCTAAGGCAATGATTGAGATAATTGTAAATTATTGTTTGGATTTTAATTTTTGTTAACATTGTATCTATAGGAAACTAGATCTTATGGGATTXXXXXXXXXXGATGGTGGAGAATTATGTTTAGTAGAGTGATTTTTTTGTAAGGACAATGGCATAGAAAGATAGAAGACAAATCCATATTTTTAGGAAAATGCCTACATTA
* *
>Marker421149
AATGGAGGAATTTAAGGCCACATGGGTCTCGCATGGGTGCAACATTATCAGGGTGGACAGACATTAGAAATATCCATGACAATGTTAATACAATCATGGAXXXXXXXXXXCTCCTACAACTAGATGCCGACCAACCTTGTATGTGCAACCTTGTCCCAATTTGCATTAGCTCCTTTGGCTCTACATCCCACCTTGCTGCTAGACTCTCCT
AATGGAGGAATTTAAGGCCACACGGGTCTCGCATGGGTGCAACATTATCAGGGTGGACAGACATTAGAAATATCCATGACAATGTTAATACAATCATGGAXXXXXXXXXXCTCCTACAACTAGATGCCGACCAACCTTGTATGTGCAACCTTGTCCCAATTTGCATTAGCTCCTTTGGCTCTACATCCCACCTTGCTGCTAGACTCTCCT
*
>Marker262670
TTCAATACCACTTCTTTTTCTTCCATTTCTCCACCAAGACCTTTGATGCTATTGACAACTTTATCCACTTTCTGCAAGTAACTTGTGATGTTTTCATCTTXXXXXXXXXXTTTAAGGCTGGTAAATTAGAGAAGAATGTGGAATCAAATCAAGAGGATTTTGATGATATGGAAGCTAACTTTGTGAGAAGAGTGAAAAAGGGTGCTGGTA
TTCAATACCACTTCTTTTTCTTCCATTTCTCCACCAAGACCTTTGATGCTATTGACAACTTTATCCACTTTCTGCAAGTAACTTGTGATGTTTTCATCTTXXXXXXXXXXTTTAAGGCTGGTAAATTAGAGAAGAATGTGGAATCAAATCAAGAGGATTTTGATGATATGGAAACTAACTTTGTGAGAAGAGTGAAAAAGGGTGCTGGTA
*
>Marker334053
AATCGATTGCTACACCTCTGAGTGTGGTTGGAAATGACCATAGCCAATAATTTTTATCATTCTATCCATTTGCATCCCAAATGATTTCACACATTTTGCAXXXXXXXXXXTATCAACCTCAAGTTCTCTTTACTCCAATCCTTTACCCTAGTATTCTTGGCTCAATTTCTTCTTCGATCAACAACTCTTCAATACCACAAAGATTGCTTC
AATCAATTGCTACACCTCTGAGTGTGGTTGGAAATGACCATAGCCAATAATTTTTATCATTCTATCCATTTGCATCCCAAATGATTTCACACATTTTGCAXXXXXXXXXXTATCAACCTCAAGTTCTCTTTACTCCAATCCTTTACCCTGGTATTCTTGGCTCAATTTCTTCTTCGATCAACAACTCTTCAATACCACAAAGATTGCTTC
* *
>Marker632365
TTTCAAGTCAATCTCATTGACCCCTATTTCGTAAGTAGTGATTCACTTGAACTCAGCTCTCATGAGCATGAATGGTCCACTTAGCACTCAATGCTCAGATXXXXXXXXXXTGTCATCATCTTCATTAATCACCACCAAGGGAATAAAACACCCTAATGATGTCCTCAAGGACAATGTTCTGGGCTAAGAGGTCCCAACAATTCTACTAAA
TTTCAAGTCAATCTCATTGACCCCTATTTCGTAAGTAGTGATTCACTTGAACTCAGCTCTCATGAGCATGAATGGTCCACTTAGCACTCAATGCTCAGATXXXXXXXXXXTGTCATCATCTTCATTAATCACCACCAAGGGAATAAAACACCCTAATGATGTCCTCAAGGACAATGTTCTGGGCTAAGAGGTCCCAGCAATTCTACTAAA
*
>Marker252722
AGATCCCATGTATTATTTTTCTTTAACACAAACATCTCTTTTTCCATAGCCACTTTCTAGAAATTTGCATCATTCATACACATAGCCTCCTTTATATTCCXXXXXXXXXXCCAGCCTTCTCTATCTACAATATTATGGAAGAGGACTTAACTTCTCTAAAGATAACACTTCTGCTATGCAAAACTCTCTCAGCCATAAGATCCCAAAGCT
AGATCCCATGTATTATTTTTCTTTAACACAAACATCTCTTTTTCCATAGCCACTTTCTAGAAATTTGCATCATTCATACACATAGCCTCCTTTATATTCCXXXXXXXXXXCCAGCCTTCTCTATCTACAATATTATGGAAGAAGACTTAACTTCTCTAAAGATAACACTTCTGCTATGCAAAACTCTCTCAGCCATAAGATCCCAAAGCT
*
>Marker402464
TTGATATCTCTAAACATGTCATCCACATACAAGGCAACAATTAGTATATGATTATCAATACATCTAGAATCAGTATATGATTATCAATACATCTAGAATCXXXXXXXXXXAAAAGAAATCTAATAGAAGATAATTTAGCAACAAGAGAGAATATTTCATCGAAATCAACTCCTTCTCTCTAGGAGTAGCCCTTGGCTACTAGTCTCGCCT
TTGATATCTCTAAACATGTCATCCACATACAAGGCAACAATTAGTATATGATTATCAATACATCTAGAATCAGTATATGATTATCAATACATCTAGAATCXXXXXXXXXXAAAAGAAATCTAATAGAAGATAATTTAGCAACAAGAGAGAATATTTCATCAAAATCAACTCCTTCTCTCTAGGAGTAGCCCTTGGCTACTAGTCTCGCCT
*
>Marker269337
CTTCGTTTGTGTATTGATTATAGGGAGCTTAACAAGAGGACCATAAAGAATAGATATCCAATACCAAGAATTGATGAATTATTGGATGAGCTTCATGGAGXXXXXXXXXXTTGGAGGCTAATTCCTTATTTGCCAAAGAAGCCAAGTGTGAGTTTGGCCTAACAGAGATTGTATATTTAGGCCATGTTATCAGTGCCAAGGGAGTTAGCA
CTTCGTTTGTGTATTGATTATAGGGAGCTTAACAAGAGGACCATAAAGAATAGATATCCAATACCAAGAATTGATGAATTATTGGATGAGCTTCATGGAGXXXXXXXXXXTTGGAGGCTAATTCTTTATTTGCCAAAGAAGCCAAGTGTGAGTTTGGCCTAACAGAGATTGTATATTTAGGCCATGTTATCAGTGCCAAGGGAGTTAGCA
*
>Marker506766
ACATTGCTTAACAAAGTTTTTTGAAGATTTGGAAAGAAGGGGTGTCAAAATTGAAAAATGTTTTGTATGGTTAGATGGGTTTGTGTCATAATTCAAATCAXXXXXXXXXXAACTAATCATACCAATCAAACCAACTTAGCTATGAATGATGTTATCCAAGGATAATTAGCAAAGGAAGAATATCAAACTAGAAATCCCCAAGACAATGAG
GCATTGCTTAACAAAGTTTTTTGAAGATTTGGAAAGAAGGGGTGTCAAAATTTAAAAATGTTTTGTATGGTTAGATGGGTTTGTGTCATAATTCAAATCAXXXXXXXXXXAACTAATCATACCAATCAAACCAACTTAGCTATGAATGATGTTATCCAAGGATAATTAGCAAAGGAAGAATATCAAACTAGAAATCCCCAAGACAATGAG
* *
>Marker260815
ACATTCAAGGACAAAACTAAGCCAAGTCACTTCAAGATGCAAGAGAAATCAACTACTAATTTTGTGCTCTTGTTTGTAGAGGAAATATGTGATTCAACCAXXXXXXXXXXTTTGCCTACTGGACACTGGGGCTAGCGCCCAAGTTTGCTACAGGTGAATTTCCAAACTTTGTTTTCAGAACTTGAATCTTGATCCCTTAAATAGCCTCCC
ACATTCAAGGACAAAACTAAGCCAAGTCACTTCAAGATGCAAGAGAAATCAACTACTAATTTTGTGCTCTTGTTTGTAGAGGAAATATGTGATTCAACCAXXXXXXXXXXTTTGCCTACTGGACACTGGGGCTAGCGCCCAAGTTTGCTACAGGTGAATTTCCAAACTTTGTTTTCAGAACTTGAATCTTGATCCCTTAAATAGCCTCCT
*
>Marker578772
TAGTTTGTAGAATAATAATGAAGATAGAACCTGATGTGGTGTAGATTTTTGCTCTCATATGTATAGAAAATAGAAAATCTAGTAATCCTCATTATCTAGAXXXXXXXXXXGATGAAGATCAATAGACAAGAAGCAATCATGCAAGTGAAGTAGAATTGATTTTGATGCAAAATATCATTCCTTTTAAAGCTTTAAATTAAAATGTTCCTA
TAGTTTGTAGAATAATAATGAAGATAGAACCTGATGTGGTGTAGATTTTTGCTCTCATAGGTATAGAAAATAGAAAATCTAGTAATCCTCATTATCTAGAXXXXXXXXXXGATGAAGATCAATAGACAAGAAGCAATCATGCAAGTGAAGTAGAATTGATTTTGATGCAAAATATCATTCCTTTTAAAGCTTTAAATTAAAATGTTCCTA
*
>Marker354318
TGATGTTTGAAGGATCTTTGATAGGCTCTTGGATAGATGTTTGATGACATGGAGATGGATGATTCCTTGCTAATAGCCATTGGATCACATCCTTCACAAGXXXXXXXXXXGGATCACCTATGACAATCTTCCCACACTTTTCAAGATTTTGGATCACTCGAGCATAAGTGTATAACAATTGAATGTCATATGGCCCATAACCCTATGATA
TGATGTTTGAAGGATCTTTGATAGGCTCTTGGATATATGTTTGATGACATGGAGATGGCTGATTCCTTGCTAATAGCCATTGGATCACATCCTTCACAAGXXXXXXXXXXGGGTCACCTATGACAATCTTCCCACACTTTTCAAGATTTTGGATCACTCAAGCATAAGTGTATAACAATTGAATGTCATATGGCCCATAACCCTATGGTA
* * * * *
>Marker212485
TATGTCATGTTTCACCAATTAAATCGGTGGGACCTCAAAACCCCGCAAGCCTTGAAACTACTTTTTTCTAAAAATCTCTTGCGCCCACCTTGCACTAACTXXXXXXXXXXAGACCCCAATTTTAGAGCTTTTTGGCCTACAAGTCGGATGACCCTAAAAATAGTGCAAACCATGCAAAATGACTATGTTTTGAAGGATTTTCAAAAGGAA
TATGTCATGTTTCACCAATTAAATCAGTGGGACCTCAAAACCCCGCAAGCCTTGAAACTACTTTTTTCTAAAAATCTCTTGCGCCCACCTTGCACTAACTXXXXXXXXXXAGACCCCAATTTTAGAGCTTTTTGGCCTACAAGTCGGATGACCCTAAAAATAGTGCAAACCATGCAAAATGACTATGTTTTGAAGGATTTTCAAAAGGAA
*
>Marker773855
ATTTCACTGTGCAAATCAAAGTTCCTCCAAGCCCACTTTAGAAATCCAAAAGTTAAATTGTGAATATTAGGCAGGATCTGAGGGTTTAGGCAAAAGGTGAXXXXXXXXXXAAGAATGGATTAGTTTTGTAAGTTAGGGTGTTGGTAGATGCAAGAAGTTAGTTTATAAAGTGGTTGAAAGAGGTGGTTAATGGTTAGAGGTAGTCATGGA
ATTTCACTGTGCAAATCAAAGTTCCTCCAAGCCCACTTTATAAATCCAAAAGTTAAATTGTGAATATTAGGCAGGATCTGAGGGTTTAGGCAAAAGGTGAXXXXXXXXXXAAGAATTGATTAGTTTTGTAAGTTAGGGTGTTGGTAGATGCAAGAAGTTAGTTTATAAAGTGGTTGAAAGAGGTGGTTAATGGTTAGAGGTAGTCATGGA
* *
>Marker119569
GTGATATTCCTTGCATCTTCAACTACGTTTTCACACAGCTTAGTTTCCCTATGTCCTCAAGGAGTTGGTCAAGGTAGTGGACAGCACAAGGACTTCAAAAXXXXXXXXXXATGATCACCTGCAAAACCAAAGATTAGCCTTTCACAAGAGAGTAGCAAGAGGATAAATTGCTTGATTGTGGTGCAAAATGGAATTATGATATTATGATAT
GTGATATTCCTTGCATCTTCAACTACGTTTTCACACAGCTTAGTTTCCCTATGTCCTCAAGGAGTTGGTCAAGGTAGTGAACGGCACAAGGACTTCAAAAXXXXXXXXXXATGATCACCTGCAAAACCAAAGATTAGCCTTTCACAAGAGAGTAGCAAGAGGATAAATTGCTTGATTGTGGTGCAAAATGGAATTATGATATTATGATAT
* *
>Marker355112
CATGACACCTGTTTGCTAGCTTTTCATCATTATACCTATCCAAGGCACCTATTTTCCAGGTTTTCACCAAAGGACATTTTTTTTGTATTTTTCTAGTTTTXXXXXXXXXXTTGTAGCTTCATGACATCATTTGTTGATATGATTTGAGATGATCAAAGGCTTTCTATCTCCTTTCCTCTAGCAACTCTAGTTCTTGCAATTTAGAAAATC
CATGACACCTGTTTGCTAGCTTTTCATCATTATACCTATCCAAGGCACCTATTTTCCAGGTTTTCACCAAAGGACATTTTTTTCGTATTTTTCTAGTTTTXXXXXXXXXXTTGTAGCTTCATGACATCATTTGTTGATATGATTTGAGATGATCAAAGGCTTTCTATCTCCTTTCCTCTAGCAACTCTAGTTCTTGCAATTTAGAAAATC
*
>Marker269384
TAGTTTCCCACAGCTTAAAAGATTGGGTTTTAACCCCCATGTTGGCGAGGACGTCAGCAACTCCGTTTCCCTTACGGAAGATATGGGAAATAAGCATGTCXXXXXXXXXXACTCCCCCACTTCCTGTCGGCCCAGGATTACCCTTGGCTGCCCCACATGCAAGGCTCTTGTTGCATGTGTTTGTTTATTTTATTTATTTGTTGTGTTATG
TAGTTTCCCACAGCGTAAAAGATTGGGTTTTAACCCCCATGTTGGTGAGGACGTCAGCAACTCCGTTTCCCTTACGGAAGATATGGGAAATAAGCATGTCXXXXXXXXXXACTCCCCCACTTCCTGTCGGCCCAGGATTACCCTTGGCTGCCCCACATGCAAGGCTCTTGTTGCATGTGTTTGTTTATTTTATTTATTTGTTGTGTTATG
* *
>Marker486652
AGTCCCAAATGACTCCCAGCTCCTCTTGCAGTAGTAGAGAATGAAGGATGAAACATCCATGCACAAGTTAAGCTACCCACTTGCAGCAGTCCAGAAATATXXXXXXXXXXCACACCACCAGGATGCTCACCAACTCTGCTAAGCAATGGCTCCATCAAATACAACCAGCTCCGCATGACTCCAGCACTCTGCCAATCACGCAGCAAGCTC
AGTCCCAAATGACTCCCAGCTCCTCTTGCAGTAGTAGAGAATGAAGGATGAAACATCCATGCACAAGTTAAGCTGCCCACTTGCAGCAGTCCAGAAATATXXXXXXXXXXCACACCACCAGGATGCTCACCAACTCTGCTAAGCAATGGCTCCATCAAATACAACCAGCTCCGCATGACTCCAGCACTCTGCCAATCACGCAGCAAGCTC
*
>Marker492686
TCAACATGCTCAAGCCAAATATTAACCTGCTAGAGGCCACTGAGTGCAAGATCCAATTAAAATTCAAGTTCATCAGGAAATATTTAAACCACAGATTATGXXXXXXXXXXGAACAGGGGGATGGGGGAATGCAGGGATGGGTTTAGGGGACTGGGGGACCATGGGCCCAAATTTGGGGACAGTGGGCGGATGGCACTGCAAATATAATAT
TCAACATGCTCAAGCCAAATATTAACCTGCTAGAGGCCACTGAGTGCAAGATCCAATTAAAATTCAAGTTCATCAGGAAATATTTAAACCACAGATTATGXXXXXXXXXXGAACAGGGGGATGGGGGAATGCAGAGATGGGTTTAGGGGACTGGGGGACCATGGGCCCAAATTTGGGGACAGTGGGCGGATGGCACTGCAAATATAATAT
*
>Marker425000
ATCTATGAAAAATCTCTGCATGCAACCCAAAATAATAAAACCTTGTAGATGTAATACAATTGTCAAATAGATCTATGGAAGATTTCTTTTACCTTGCAAGXXXXXXXXXXAAGTTTTTAATATAATAGAAATTACATAATTAGCTCATAAAATGTAGTTTACTTTTTTTTGAGAAAAATGAGTAAAAATTTATTAATAAAATAAATCAAC
ATCTATGAAAAATCTCTGCATGCAACCCAAAATAATAAAACCTTGTAGATGTAATACAATTGTCAAATAGATCTATGGAAGATTTCTTTTACCTTGCAAGXXXXXXXXXXAAGTTTTTAATATAATAGAAATTACATAATTAGCTCATAAAATGTAGTTTACTTTTTTTTGAGAAAAAGGAGTAAAAATTTATTAATAAAATAAATCAAC
*
>Marker291985
TAATAATATCATATATATCATAAATCATACCAACAACACTATCTTTTCCATGATCATCAACCTTTATCAGGTTCATCTTATTATACACCCACTAATTGGTXXXXXXXXXXTATGGCTAGTAGATTA---TTTTAAATTCCTACATGATGCCACTCATTGTTTTCATTTCTATTTTGTAGGTTTACAAGATGGACCACTCATTTCAAGAGAATA
TAATAATATCATATATATCATAAATCATACCAACAACACTATCTTTTCCATGATCATCAACCTTTATCAGGTTCATCTTATTATACACCCACTAATTGGTXXXXXXXXXX---GGCTAGTAGATTATTGTTTTAAATTCCTACATGATGCCACTCATTGTTTTCATTTCTATTTTGTAGGTTTACAAGATGGACCACTCATTTCAAGAGAATA
>Marker228021
TAGCTTAGTAGATGAAACATTCTTCTCTTTCCCAGCACCCAAATCCACAATGGGTTTACTCTTAGCCTCCCCAGTTGATTTAATCTTCACTTTCTTCACAXXXXXXXXXXCAAATAGTCCTTATTAAAGATTTAGAATTTACAAGACCTTTTAAAACATTAAATATTTCTTTTTTAAATCATCACCTTAATAATGTTATGTCA----------TCCTAAT
TAGCTTAGTAGATGAAACATTCTTCTCTTTCCTAGCACCCAACTCCACAATGGGTTTACTCTTAGCCTCCCCAGTTGATTTACTCTTCACTTTCTTCACAXXXXXXXXXX----------TTATTAAAGATTTAGAATTTACAAGACCTTTTAAAACATTAAATATTTCTTTTTTAAATCATCACCTTAATAATGTTATGTCATCCTAATTGTTCCTAAT
* * *
>Marker487506
AAATGAATATTTGCCTCATGAATGACTTCTACATTTTGGGCTGCAATTTATGTTGTTGAAGATGCAAGAGAATTCTGAAAATGTTGGATGTGGTTCTCCCXXXXXXXXXXTGAAATAATCAATCTTGGGAAATGGTTTACTGATTTTTCATACATATTGTGTTCAGTGCACTATATGTTATGCACAATCTCCATTTGTTATGTTCGCTTG
GAATGAATATTTGCCTCATGAATGACTTCTACATTTTGGGCTGTAATTTATGTTGTTGAAGATGCAAGAGAATTCTGAAAATGTTGGATGTGGTTCTCCCXXXXXXXXXXTGAAATAATCAATCTTGGGAAATGGTTTACTGATTTTTCATACATATTGTGTTCAGTGCACTATATGTTATGCACAATCTCCATTTGTTATGTTCGCTTG
* *
>Marker237364
AATAGTGGCAAATATTAAGATGGACTTACAACCTTTAAAGGGAGGCGCTCACATTCAAGGGAAGTGATTACTTATTTCCAAGGCTTAAAGAGCCTTCCTAXXXXXXXXXXCAGCTTCATATGCAGAGTAATGGGTTCTTCTTGAGGTCAGAAAGTTGGTTTTATTATCATTTGTAATTTCTGATTTTAATATAGTATTTCTGGTTTTATC
AATAGTGGCAAATATTAAGATGGACTTACAACCTTTAAAGGGAGGCACTCACATTCAAGGGAAGTGATTACTTATTTCCAAGGCTTAAAGAGCCTTCCTAXXXXXXXXXXCAGCTTCATATGCAGAGTAATGGGTTCTTCTTGAGGTCAGAAAGTTGGTTTTATTATCATTTGTATTTTCTGATTTTAATATAGTATTTCTGGTTTTATC
* *
>Marker445655
GGGCACCCCTGGAAGTGGTGTTAGAAAACCTAGAATAGTTATTTTGGTGAAAAATCAAATCTATAGCTCAAAAATTGAGTTTATTCATTTTTATAACAAAXXXXXXXXXXCATGCTATTCTATTATTTTGGATCATAAGAACTATATGTCCTAGAAAGAAGAGATCGTGGATCACTTAATAAACTAATGACATAACATGTGCATCTATAG
GGGCACCCCTGGAAGTGGTGTTAGAAAACCTAGAATAGTTATTTTGGTGAAAAATCAACTCTATAGCTCAAAAATTGAGTTTATTCATTTTTATAACAAAXXXXXXXXXXCATGCTATTCTATTATTTTGGATCATAAGAACTATATGTCCTAGAAAGAAGAGATCGTGGATCACTTAATAAACTAATGACATAACATGTGCATCTATAG
*
>Marker365463
TATGGAATCTATTAAATGGTAAGTCATTTATAAATCTCCCCAATCTAAGCTTGTATAAATTATTTCCTCAAGGTGATTGTAATCAATTTTCCATGGTATGXXXXXXXXXXTGGCAACAATTGCATAAAATCTTAGTGTTGACTCTAGTAAATTTAACACATTTCTAAAAGCAACCCCACTTACAACTATGAGTGGCTATTTTTTGATATT
TATGGAATCTATTAAATGGTAAGTCATTTATAAATCTCCCCAATCTAAGCTTGTATAAATTATTTCCTCAAGGTGATTGTAATCAATTTTTCATGGTATGXXXXXXXXXXTGGCCACAATTGCATAAAATCTTAGTGTTGACTCTAGTAAATTTAACACATTTCTAAAAGCAACCCCACTTACAACTATGAGTGGCTATTTGTTGATATT
* * *
>Marker406786
TTTTTCTCATTGTATTTGGGGGTTCAAGCTATTTTGTAATCAGATTTTCTTTTGAGTTTGGTTTTCAGATATTGTTGTGTAGTTGCAGCTCTACTTTCATXXXXXXXXXXTACTGACTTGGACAGGGTATGCGCTTCTTTCTTCACCATGCTATTTAGAAAAGACCCACTTTTTGTAGGATATTGATGCGGCTAAGCAAATGTTATTACT
TTTTTCTCATTGTATTTGGGGGTTCAAGCTATTTTGTAATCAGATTTTCTTTTGAGTTTGGTTTTCAGATATTGTTGTGTAGTTGCAGCTCTACTTTCATXXXXXXXXXXTACTGACTTGGACAGGGTATGCGCTTCTTTCTTCACCATGCTATTTAGAAAAGACCCACTTTTTGTAGGATATTGATGCGGCTAAGCAAATATTATTACT
*
>Marker546396
ATAGTTCTTGCATCCCAAATTCACGTTTTGATTCTTCTGCATATAAACCTTTTGATTCCAAAATACCAAGCACCTCATCTAAATGCTTAAGATGCTCTTCXXXXXXXXXXGTTGCAAACAGTCGATAGACTGAAATAGAAAGTTTCAAATTAAAGATTTGAAAGAAGATTCACATCAAATTACATACCGATAGCTTCTCAGTCTTCTTAC
ATAGTTCCTGCATCCCAAATTCACGTTTTGATTCTTCTGCATATAAACCTTTTGATTCCAAAATACCAAGCACCTCATCTAAATGCTTAAGATGCTCTTCXXXXXXXXXXGTTGCAAACAGTCGATAGACTGAAATAGAAAGTTTCAAATTAAAGATTTGAAAGAAGATTCACATCAAATTACATACCGATAGCTTCTCAGTCTTCTTAC
*
>Marker769957
CTTGTTTGATCAACTTCCTTAATTTGTTGACAAAGATAAGGAGAGTAGACCAATGCCCACATCAGCAAAAGATTTCAAGCAGTGTGAGGATGTTGGAGACXXXXXXXXXXAAGAGCATATGCTTCAAGGGAGAGATATTGATGTTCCTTCAAAACTTCAAGAGAGCTTCCATGGAGCTAACACGAGTCCTCTTATGTGGAAGAATGAGGA
CTTGTTTGATCAACTTCCTTAATTTGTTGACAAAGATAAGGAGAGTAGACCAATGCCCACATCAGCAAAAGATTTCAAGCAGTGTGAGGATGTTGGAGACXXXXXXXXXXAAGAGCATATGCTTCAAGGGAGAGATATTGATGTTCCTTCAAAACTTCAAGAGAGCTTCCATGGAGCTAACATGAGTCCTCTTATGTGGAAGAATGAGGA
*
>Marker408941
ATGGTGAGATGGTTCGGCCACCATAGGACACTTGGTGATTTTGTTATCTCTTTTTGAACCCCTTATTCTACTCAAGTTCACATTATCGATGTAATGACTAXXXXXXXXXXCTTATATTGTAATATCCACAGCTTGTTCAATAAGGCTTTTAAAAGTAATTATAACATAGGCATTTAGGACAGTCATGATGGTTTTTGGAAGCATTTTTTG
ATGGTGAGATGGTTCGGCCACCATAGGACACTTGGTGATTTTGTTATCTCTTTTTGAACCCCTTATTCTACTCAAGTTCACATTATCGATGTAATGACTAXXXXXXXXXXTTTATATTGTAATATCCACAGCTTGTTCAATAAGGCTTTTAAAAGTAATTATAACATAGGCATTTAGGACAGTCATGATGGTTTTTGGAAGCATTTTTTG
*
>Marker383097
ATTATTTCTACATTCCATTGATAAATTTGATCTATTTAAAATACAATAGAAAGTGAATTAATTTATTTATTAAGTAAAACACTTCCACGAGATTAAATTTXXXXXXXXXX-TCATTAATTTGACCATGGATGTATGATTAAAAAGATGTGATGGAATTGCTCAAGGAATATTGTTGCTACAAGTAGAGCCATGTCATGCAAGACTTAGTCT
ATTATTTCTACATTCCATTGATAAATTTGATCTATTTAAAATACAATAGAAAGTGAATTAATTTATTTATTAAGTAAAACACTTCCACGAGATTAAATTTXXXXXXXXXXATCATTAATTTGACCATGGATGTATGATTAAAAAGATGTGATGGAATTGCTCAAGGAATATTGTTGCTACAAGTAGAGCCATGTC-TGCAAGACTTAGTCT
>Marker436555
CCATTTGAGACCTCAGGGTCTTCTTAGATGATGCAATGACATAGGTGTAAGTTCTTCAAATCTATTTTTTTATTTTGGTGCTCGGTATCAATCACCTTCTXXXXXXXXXXGGGATCTTTTAATGCAGCTCATTAGCATAAGCTTCTAAAGAAAAAGATAACTCTTGGTAGTTCATTGGCAAGGCACCCCCTTGCTCCATCAAGTCCCATA
CCATTTGAGACCTCAGGGTCTTCTTAGATGATGCAATGACATAGGTGTAAGTTCTTCAAATCTATTTTTGTATTTTGGTGCTCGGTATCAATCACCTTCTXXXXXXXXXXGGGATCTTTTAATGTAGCTCATTAGCATAAGCTTCTAAAGAAAAAGATAACTCTTGGTAGGTCATTAGCAAGGCACCCCCTTGCTCCATCAAGTCCCATA
* * * *
>Marker315176
TTATTCGCATCTCTCATGTCTCAATTCATTTTATCAGTATTCAAGTGAAATAGCCTTGTCCCGTATTGTGAAGGTGGTTATTTGTAGCTTGTGCTCCTGGXXXXXXXXXXTCATATTCTAGGTATCAATCATCTAGGTCACACTGTTTTGTCTGCAACTTTGAGGTATGCATTTATTGTCATTATTTGATTTTATTCTCAAATCCAATCA
TTATTCGCATCTCTCATGTCTCAATTTATTTTATCAGTATTCAAGTGAAATAGCCTTGTCCCGTATTGTGAAGGTGGTTATTTGCAGCTTGTGCTCCTGGXXXXXXXXXXTCATATTCTAGGTATCAATCATCTAGGTCACACTGTTTTGTCTCCAACTTTGAGGTATGCATTTATTGTCAGTATTTGATTTTATTCTCAAATCCAATCA
* * * *

## Sheet: LG2
>Marker180744
ATATTCAAGTCATCCAGATGTAACTAAGCTCCTAGTGGACATGAAACCTCTTTATTTCTAGAAAGAAATGAAGAATGACATTGTAAGATTTGTAGCAAGTXXXXXXXXXXTGGTAAGCAAGAATAGAGCATGTAGCAAGGTCTGACAGTCAGGTCTGGATCTCTCAGAGGAAGTATGTCAGTAAAGTGCAAACTTGGGGAAGTCAAGAGG
ATATTCAAGTCATCCAGATGTAACTAAGCTCCTAGTGGACATGAAACCTCTTTATTTCTAGAAAGAAATGAAGAATGACATTGTAAGATTTGTAGCAAGTXXXXXXXXXXTGGTAAGCAAGAATAGAGCATGTAGCAAGGTCTGACAGTCAGGTCTGGATCTCTCAGATGAAGTATGTTAGTAAAGTGCAAACTTGGGGAAGTCAAGAGG
* *
>Marker224205
ATTGTAGCATTCCTAATCGCTTTCTTGAGACAAGACACATGAAAAACTAGGTGAATTTTAGAAGAGGGTGGTGACAGGCTAGTATTCTCACCTGTCACATXXXXXXXXXXCTAAGAAAAAGCATGTAAACTATCTAAGAATCAACACTTGCAGTTTAACTATGAAATTTAAACAAAGATCACTAACTACTAATGACTAACTATTACTGAA
ATTGTAGCATTCCTAATCGCTTTCTTGAGACAAGACACATGAAAAACTAGGTGAATTTTAGAAGAGGGTGGTGACAGGGTAGTATTCTCACCTGTCACATXXXXXXXXXXCTAAGAAAAAGCATGTAAACTATCTAAGAATCAACACTTGCAGTTTAACTATGAAATTTAAACAAAGATCACTAACTACTAATGACTAACTATTACTGAA
*
>Marker155500
TTCAATTTATTATATTCATTTAGCACTTCCAAATGCTCTTGCAATAGTTTGTTATACTTTCTCTGCAGTGCCTCCATTGTTGCCCTACTAAACTTGACAAXXXXXXXXXXGGAAATATCTCACTTAGGGAGCAACATAATTCCACTCTGTCTAATCATGTGCCTACCCTCCTCAGGAGTGATGTCTTTAGCCTCAGCTTTCATCTGTGAT
TTCAATTTATTATATTCATTTAGCACTTCCAAATGCTCTTGCAGTAGTTTGTTATACTTTCTCTGCAGTGCCTCCATTGTTGCCCTACTAAACTTGACAAXXXXXXXXXXGGAAATATCTCACTTAGGGAGCAACATAATTCCACTCTCTATAATCATGTGCCTACCCTCCTCAGGAGTGATGTCTTTAGCCTCATCTTTCATCTGTGAT
* * * *
>Marker60212
TCTAGCAGTATGATTATCAACAATTTACTTCTATTGTCAAAGCTGCACACATCTACAAAGATAGAGTGAAGGGATTAGCTTCCAGTGTGGAGGTGTCTTGXXXXXXXXXXACAATGTATTAACAAAACTTAATGTTGTTTACAATACACTTGCAATGCAAGATTCAATGGTCTTCGACACTCGTGTCTGGAGTCAAACTGGCAGCATAAC
TCTAGCAGTATGATTATCAACAATTTACTTCTATTGTCAAAGCTGCACACATCTACAAAGATAGAGTGAAGGGATTAGCTTCCAGTGTGGAGGTGTCTTGXXXXXXXXXXACAATGTATTAACAAATCTTAATGTTGTTTACAATACACTTGCAATGCAAGATTCAATGGTCTTCGACACTCGTGTCTGGAGTCAAACTGGCAGCATAAC
*
>Marker427369
CTATTTATCAAAGAATTCATAGGATAGAATCTAGAAGTCATTACAGATTGAGTTTGTGGCTATTTATCAAATGACACTCATACTATCACATGTGAATCACXXXXXXXXXXCATAAAGAAAAAAGGAATATTTTGACTGCAATCCACATATAGGATTCTACAATGCATCCATAGATTTTGATGCACACAAGTCCTATTTTAGTCAGCAAAT
CTATTTATCAAAGAATTCATAGGATAGAATCTAGAAGTCATTACAGATTGAGTTTGTGGCTATTTATCAAATGACACTCATACTATCACATGTGAATCACXXXXXXXXXXCATAAAGAAAAAAGGAATATTTTGATTGCAATCCACATATAGGATTCTACAATGCACCCATAGATTTTGATGCACACAAGTCCTATTTTAGTCAGCAAAT
* *
>Marker15357
AAATTAAATGCTTTAGAAAATAATAAATAAAACCATGATATTTTAGTTGGAAATGATCTAACAAATGACAAAAAAATAACAATTTGCTAATAGCGTGG-AA-XXXXXXXXXXTAAACGTAATGCTGTGATCGCAAAATTTATATAATTGTATTTAAGCTAGTTAGAGATTTTAATAATCTAACGAGGCGTTAATAACTTTGAACTAGGACGC
AAATTAAATGCTTTAGAAAATAATAAATAAAATCATGATATTTTAGTTGGAAATGATCTAACAAATGAC--AAAAATAACAATTTGCTAATAGCGTGGAAATXXXXXXXXXXTAAACGTAATGCTGTGATCGCAAAATTTATATAATTGTATTTAAGCCAGTTAGAGATTTTAATAATCTAACGAGGCGTTAATAACTTTGAACTAGGACGC
* *
>Marker85678
TTTCTTTCTTTTGAGGTTGGATTTGAGCAGTAAACTCAAGCAACTCTCAGTGGTTTTTTCCCTCATAGGGTTTCCACGTAAATCTGGTGTCATGTGTGTAXXXXXXXXXXACCAAGAAGCACGAGCACACCAACATGGGCATCTTCATCTAATATGAGAAAGAACAACAAGTGTAACAAGTGCCCTAGCAACAAACACAATATGCAACAA
TTTCTTTCTTTTGAGGTTGGATTTGAGCAGTAAACTCAAGCAACTCTCAGTGGTTTTTTCCCTCATAGGGTTTCCACGTAAATTTGGTGTCATGTGTGTAXXXXXXXXXXACCAAGAAGCACAAGCACACCAACATGGGCATCTTCATCTAATATGAGAAAGAACAACAAGTGCAACAAGTGCCCTAGCAACAAACACAATATGCAACAA
* * *
>Marker56671
AGGTTTTAACATTCCTCCTAACCCTTGACATGCCTTTATAGGCTTACAAACATGAAAACTTGAATGACTGTCCTATATGCCTCAACAAAGGCTTACATAAXXXXXXXXXXTCTTAAATCTTGTTGGGATGTTCGTCTAACTAGGAAACATGAACTCTCCAAGTGTGATCCTTCTCCTTCTCCAACCTGCATGGCTTCTGTAAACAATGTT
AGGTTTTAACATTCCTCCTAACCCTTGACATGCCTTTATAGGCTTACAAACATGAAAACTTTAATGACTGTCCTATATGCCTCAACAAAGGCTTACATAAXXXXXXXXXXTCTTAAATCTTGTTGGGATGTTCTTCTAACTAGGAAACATGAACTCTCCAAGTGTGATCCTTCTCCTTCTCCAACCTGCATGGCTTCTGTAAACAATGTT
* *
>Marker67292
ATAATTCTATCATCTTGTGTAAAAATATATGTTGTAATTTAGTTGTTCACAGTTTATGCAGCTTGTCCTGGATTATTGCTTCTATTTCCATTATTCAGGGXXXXXXXXXXCAATCACAGCTGAACTTTTATTTGTGGAATTACCTGTCTTTAGTATGCATGGTAGCTTTGAGTCTTCATACTCCACTTGTGCACAACAACCATGCAATTA
ATAATTCTATCATCTTGTGTAAAAATATATGTTGTAATTTAGTTGTTCACAGTTTATGCAGCTTGTCCTGGATTATTGCTTCTATTTCCATTATTCAGGGXXXXXXXXXXCAATCACAGCTGAACTTTTATTTGTGGAATTACCTGTCTTTAGTATGCATGGTATCTTTGAGTCTTCATACTCCACTTGTGCACAACAACCATGCAATTA
*
>Marker160860
TTCGGGTGTGAGGTGAAGCCTTGGGCCTACGGCCGTGGGTCTTGGAATCCTTAATCCACCCTCTCGTATTAGGTGAGTGGTCTGATTAATGGGTAGGATTXXXXXXXXXXTCCTATTGAACCTTGTTGTTTCTGCAGATGCAAAACGGCCCAGGAAGAGGGAAGGAAAATAGGCCAGCACCTCACACGAACTCCCAACAACCTACAGATT
TTCGGGTGTGAGGTGAAGCCTTGGGCCTACGGCCGTGGGTCTTGGAATCCTTAATCCACCCTCTCGTATTAGGTGAGTGGTCTGATTAATGGGTAGGATTXXXXXXXXXXTCCTATTGAACCTTGTTGTTTCTGCAGATTCAAAACGGCCCAAGAAGAGGGAAGGAAAATAGGCCAGCACCTAACACGAACTCCCAACAACCTACAGATT
* * *
>Marker137170
GTTTTCACACACTATCAGTGTAACTTGGAATGATCAAATTGCATTCCTATCTACATTAGGAAATGAGTTTTATTTTATGGGTATTTGTCCATGTTTGAAGXXXXXXXXXXTTTTGCTGAGGTAAGCCTAAGGGCTGTGGTCTGGTGGCAAATTCTAGGGAGTTATATACCATCGTTGGCACAGACACATGTTAGCACATCTCTTCAAGAT
GTTTTCACACACTATCAGTGTAACTTGGAATGATCAAATTGCATTCCTATCTACATTGGGAAATGAGTTTTATTTTATGGGTATTTGTCCATGTTTGAAGXXXXXXXXXXTTTTGCTGAGGTAAGCCTAAGGGCTGTGGTCTGGTGGCAAATTCTAGGGAGTTATATACCATCGTTGGCACAGACACATGTTAGCACATCTCTTCAAGAT
*
>Marker58757
AATGTTTATATGCGCAGGAATGTTATATGTGCAACAGGACTGTTTAAATGCACAGCAATATGTTTCAAATGCGTTGAAATGGTATATGCACAGCAAGATGXXXXXXXXXXGTATGTTCAAGACTTGTAAAAAAGCCCAAGTTTTCATGGGTCTAACACAATTTGCAAACAAAACAAACACTTTTTATCCCTAAAGACAGGGCTTCATTAC
AATGTTTATATGCGCAGGAATGTTATATGTGCAACAGGACTGTTTAAATGCACAGCAATATGTTTCAAATGCGTTGAAATGGTATATACACAGCAAGATGXXXXXXXXXXGTATGTTCAAGACTTGTAAAAAAGCCCAAGTTTTCATGGGTCTAACACAATTTGCAAACAAAACAAACACTTTTTATCCCTAAAGACAGGGCTTCATTAC
*
>Marker144815
CCCACCTAGGCATATTAAAGCCTAAAGAGCAAGGAATTCTAACCATCTTGGTTGATTCCTTTCATTGGCCATATCACTTGTTGAACCTGATCATATGGCTXXXXXXXXXX-TGATATCTAAGATCTCCTAAAACATGTCACCATCAATAGTAGAACCAATCAATCCTAGGACATGATCATTCTTGTAATCCTATGCTTGTTTCTGATATGG
CCCACCTAGGCATATTAAAGCCTAAAGAGCAAGGAATTCTAACCATCTTGGTTGATTCCTTTCATTGGCCATATCACTTGTTGAACCTGATCATAAGGCTXXXXXXXXXXATGATATCTAAGATCTCCTAAAACATGTCACCATCAATAGTAGAACCAATCAATCCTAGTA-ATGATCATTCTTGTAATCCTATGCTTGTTTCTGATATGG
* *
>Marker41653
GTTCACACTAGATTTGCTTCAAAAATTAGAGAACGAAGTCGCTAGGTATATGTTATAACCTCAAAAGGTCAAAAACATTATTGTCTATACCAAAACAACAXXXXXXXXXXTACTGTATAAACTGAAACTAAATTGAAAATTTATCCTAAAAGGGGTGATGAACCAATATTTTAACTTAAATCTGCAATATATGACGCATAAACACTTTCT
GTTCACACTAGATTTGCTTAAAAAATTAGAGAATGGAGTCGCTAGGTATATGTTATAACCTCAAAAGGTCAAAAACATTATTGTCTATACCAAAACAACAXXXXXXXXXXTACTGTATAAACTGAAACTAAATTGAAAATTTATCCTAAAGGGGGTGATGAACCAATATTTTAACTTAAATCTGCAATATATGACGCATAAACACTTTCT
* * * *
>Marker251518
ATTCTTCCACTATTCATCTGATTTTAAATTCCACTTGTCCTCTCCTCCCAATCTTAAATTCTTCACAAAATCCAAACCATACCTTTTCATAAATAAAGCCXXXXXXXXXXTAGATTGCAATGAAATTCTGCCACATTGAGCACTCACATATAACTAAATTAGCATATGATTATATCATTAGGGTAAATCAATAGAATTGCATATAGATAG
ATTCTTCCACTATTCATCTAATTTTAAATTCCACTTGTCCTCTCCTCCCAATCTTAAATTCTTCACAAAACCCAAACCATACCTTTTCATAAATAAAGCCXXXXXXXXXXTAGATTGCAATGAAATTCTGCCACATTGAGCACTCACATATAACTAAATTAGCATATGATTATATCATTAGGGTAAATCAATAGAATTGCATATAGATAG
* *
>Marker278303
TTCGTGTAGGCTTCTATCTTTAAAAGATGGGTATACTAGTGGCGGGGAACTATTCTAAAGATACAAAATTCAAAATAAATGAAATAATTTAATGTGATCGXXXXXXXXXXAGCCAATGATTACAGAGCATATATAACTAAAATGCTCAAAAAACATACAAAGATCTTCATAATCATATATAATAGTATAATTACTAACTATTTTTATAAT
TTCGTGTAGGCTTCTATCTTTAAAAGATGGGTATACTAGTGGCAGGGAACTATTCTAAAGATACAAAATTCAAAATAAATGAAATAATTTAATGTGATCGXXXXXXXXXXAGCCAATGATTACAGAGCATATATAACTAAAATGCTCAAAAAACATACAAAGATCTTCATAATCATATATAATAGTATAATTACTAACTATTTTTATAAT
*
>Marker196690
GATATTTATGGATCTGATGTTGTGTCATTAGATGGTGCCAACATTAAGGAAAATAAATGTCAAATGCAATTTAATTTTTTCTGCTTCCCAGATCAGATAGXXXXXXXXXX-TGAAACACG-AAAATATGGGCTTTACTTTTTCTGTTGGCCTTGTGCCATCATCCATGGTGTGGTTCTTCAAACCATACCAATTTAGGGCAAAAAGGAAGGT
GATATTTATGGATCTGATGTTGTGTCATTAGATGGTGCCAACATTAAGGAAAATAAATGTCAAATGCAGTTTAATTTTTTCTGCTTCCCAGATCAGATAGXXXXXXXXXXATG--ACACGAAAAATATGGGCTTTACTTTTTCTGGTGGCCTTGTGCCATCATCCATGGTGTGGTTCTTCAAACCATACTAGTCTAGGGCAAAAAGGAAGGT
* * * * *
>Marker233583
GGTTTAGAATCATATAGTTGCACTTGTTAACTCACACTTCAATTTCTAACGGGAAAGTAAATGGATGCTCATGCAAATCTCACATAATTTTAACTAGGAAXXXXXXXXXXTATCTGGGCTAAAATTGAACACATCATTGCTATCTTGGTAAAACTGGACCATTGCTATCTGTAGACACCGAAAATTGGATTGCTCTGCAAACCAATTTCC
GGTTTAGAATCATATAGTTGCACTTGTTAACTCACACTTCAATTTCTAACAGGAAAGTAAATGGATGCTCATGCAAATCTCACATAATTTTAACTAGGAAXXXXXXXXXXTATCTGGGCTAAAATTGAACACATCATTGCTATCTTGGTAAAACTGGACCATTGCTATCTGTAGACACCGAAAATTGGATTGCTCTGCAAACCAATTTCC
*
>Marker339072
ATAGAGTCAAATAATGAAGGGTTTCTAGAGATACAAACTCGCTTCAAGGATGAAACCAACTCTCTCAAAGGTCTCTTCCATTGGCAAATGGAAGATTATGXXXXXXXXXXGGTTGTAAATGACTGGGATCTAGTATTGAAGGCAGCTGCATTTGGAATCAATATAAGATTATAAGGATGTATTTGCCTAGATATATAAAGACCTAATAGA
ATAGAGTCAAATAATGAAGGGTTTCTAGAGATACAAACTCGCTTCAAGGATGAAACCAACTCTCTCAAAGGTCTCTTCCATTGGCAAATGGAAGATTATGXXXXXXXXXXGGTTGTAAATGACCGGGATCTAGTATTGAAGGCAGCTGCATTTGGAATCAATATAAGATTATAAGGATGTATTTGCCTAGATATATAAAGACCTAATAGA
*
>Marker64233
TCCACTAAACACTTTTGTTTTGGGGGCTCTAATACTAATTTAGCAGGCTATGTGGACTCAGATTTGGTAGGGGATATTAATACTAGGTGGAGCACTATAGXXXXXXXXXXTACAGTTGAGATATCACTTCATTAGATCATTGTTGGATGATGGACAGTTAAGGCTAGAAAAGATACATACAAATGAAAATCCAACCAATATGTTTACAAA
TCCACTAAACACTTTTGTTTTGGGGGCTCTAATACTAATTTAGCAGGCTATGTGGACTCAGATTTGGTAGGGGATATTGATACCAGGTGGAGCACTATAGXXXXXXXXXXTACAGTTGAGATATCACTTCATTAGATCGTTGTTGGATGATGGACAGTTAAGGCTAGAAAAGATACATACAAATGAAAATCCAACCAATATGTTTACAAA
TCCACTAAACACTTTTGTTTTGGGGGCTCTAATACTAATTTAGCAGGCTATGTGGACTCAGATTTGGTAGGGGATATTGATACCAGGTGGAGCACTATAGXXXXXXXXXXTACAGTTGAGGTATCACTTCATTAGATCGTTGTTGGATGATGGACAGTTAAGGCTAGAAAAGATACATACAAATGAAAATCCAACCAATATGTTTACAAA
* * * *
>Marker420786
TGTTCCTCTAATTCTGGTTGAGGGAAAGCATAAAAGAATGCATCTTTTCCCACCAAAATATGTGAAGAATTCAAGCTTTCTTACACTGCCTAATAATAATXXXXXXXXXXGAATTTTGCAAATGAGCTAGACAGAAGGCATTGTGAATATTCCATTCAAGGCCATACAAGTTTGGTTAACAAGGTTGAACTTGATCGGGCCAATTTTTCT
TGTTCCTCTAATTCTGGTTGAGGGAAAGCATAAAAGAATGCATCTTTTCCCACCAAAATATGTGAAGAATTCAAGCTTTCTTACACTGCCTAATAATAATXXXXXXXXXXGAATTTTGCAAATGAGCTAGACAGAAGGCATTGTGAATATTCCATTCAAGGCCATACAAGTTTGGTTAACAAGGTTGAACTTGATCAGGCCAATTTTTCT
*
>Marker88291
GGTCTTATTTCAATTCATCATTTAAAACCCCTTTATTAGTTAAGCACAGTAATAAAATTTACCTTGATATTGCTTATACAATTTATACCAACCATCCATCXXXXXXXXXXTAACATTACGTATTTGAGGTAGTGTAGAGGAATGTTAGGACAATCTAAATCTAAGATGTCAGCCTCCGGTGACGAGGGGATTAAAAGTTATGAGCATCTG
GGTCTTATTTCAATTCATCATTTAAAACCCCTTTATTAGTTAAGCACAGTAATAAAATTTACCTTGATATTGCTTATACAATTTATACCAACCATCCATCXXXXXXXXXXTAACATTACATATTTGAGGTAGTGTAGAGGAATGTTAGGACAATCTAAATCTAAGATGTCAGCCTCCGGTGACGAGGGGATTAAAAGTTATGAGCATCTG
*
>Marker87276
ATCCTCACTGTGGAATCACTCCACCACTGCAGTCAACAACCCGTGGTTCATGTGAACCTCAAGCATGAAACAAACGTAATGAAGACCCATAGCACCAAGAXXXXXXXXXXTAGTGCAAATGGGCTGATCTAGGTGGCAAATGTGCCGATCCATATCATATGCACCGCTTCACCATGAATGCACTAATCCTTGATGTGTATGCACTGTTCT
ATCCTCACTGTGGAATCACTCCACCACTGCAGTCAACAACCCGCGGTTCATGTGAACCTCAAGCATGAAACAAACGTAATGAAGACCCATAGCACCAAGAXXXXXXXXXXTAGTGCAAATGGGCTGATCTAGGTGGCAAATGTGCCGATCCATATCATATGCACCGCTTCACCATGAATGCACTAATCCTTGATGTGTATGCACTGTTCT
*
>Marker25321
CATTGAGGACATTAGTGTTCTCTTCGATGATAGTTTGAATGAAATTGCATCTCCATTATCCTCTTCAGATATTCATGCTCTACATCATCCTACACATGGTXXXXXXXXXXTGTTGGATCTACATCTGCATCCTTTGTCAACTATCCAACCTCACTGCAGCAGGACATGTATTATGGGGGGTTTCATATACCTTCTCGAGGAATCCTCTAT
CATTGAGGACATTAGTGTTCTCTTCGATGATAGTTTGAATGAAATTGCATCTCCATTATCCTCTTCGGATATTCATGCTCTACATCATCCTACACATGGTXXXXXXXXXXTGTTGGATCTACATCTGCATCCTTTGTCAACTATCCAACCTCACTGCAACAGGACATGTATTATGGGGGGTTTCATAGACCTTCTCAAGGAATCCTCTAT
* * * *
>Marker553257
AGTCTTGACTAGGTCTGCAACAGCATGAAGGGATGTTAACAGTCCATTATCTAGACTTGGGAGGCCATATAGCAGTAGTAGATGACTGAATTTCATCAAAXXXXXXXXXXTGGTTTTTTGTTCAAAATAATTTTACTAGTGTTGTAGCTAACTAGTTTGTCAATATTCCCTTTGTAGTGAAATTTGCATTTTAATTGTAATTTGGATGGT
AGTCTTGACTAGGTCTGCAACAACATGAAGGGACATTAACAGTCCATTATCTAGTCTTGGGAGGCCATATAGCAGTAGTAGATGACTGAATTTCATCAAAXXXXXXXXXXTGGTTTTTTGTTCAGAATAATTTTACTAGTGTTGTAGCTAACTAGTTTGTCAATATTCCCTTTGTAGTGAAATTTGCATTTTAATTGTAATTTGGATGGT
* ** * *
>Marker445965
AGAAATTATAACCACATCACCCTTATTATGGTATGGTTTTCTATCTTCTTAACTCACTCACTTTGCTAAGATGGTATCTATCTCTATGGCAGGTTGTGAAXXXXXXXXXXAGAGAATATTCTTTTGCATGACTAGTGGCTAAATGCTACTGGAAACATGTATAGTGATAAAGCAACTTAGCCGATCTGATTTTTACTACTTACGATTATG
AGAAATTATAACCACATCACCCTTATTATGGTATGGTTTTCTATCTTCTTAACTCACTCACTTTGCTAAGATGGTATCTATCTCTATGGCAGGTTGTGAAXXXXXXXXXXAGAGAATATTCTTTTGCATGACTAGTGGCTAAATGCTACTGGAAACATGTATAGTGATAAAGCAACTTAGCCGGTCTGATTTTTACTACTTACGATTATG
*
>Marker274928
TCATTCTTGACAAATTCCACTGATCAAACACCTCCACACACTTCACTTTGACTCAAATCATCACTTCCTCTACACAACAAACATTGTTGCCTTGAACATAXXXXXXXXXXATGCTAGATCACACTTTCAAACATTAGGTGTAATTATCAAAATATTTCAAGTCGACCTAGCAACACTTATTCTTCCACAAATTAGCTCCAAACCAAAAAA
TCATTCTTGACAAATTCCACTGATCAAACACCTCCACACACTTCACTTTGACTCAAATCATCACTTCCTTTACACAACAAACATTGTTACCTTGAACATAXXXXXXXXXXATGCTAGATCACACTTTCAAACATTAGGTGTAATTATCAAAATATTTCAAGTCAACCTAGTAACACTTATTCTTCCACAAATTAGCTCCAAACCAAAAAA
* * * *
>Marker268378
TTATCCTAGGCAACTAAAGGATTCTTTTTGTGATCCTCAATGCCTTGCTAAACAAAATTTATCATTATCTTCTCTAGATTTTTGATTATTCCAGCTAGGGXXXXXXXXXXTTTAGATTTGTTATCATTTATTAATCACTTAGAAGCCTTGGAATAAGACTCCAAAATGTCCTTCAAAGCATAATCTTCATAGAGGGAAGCATCTCCAAAG
TTATCCTAGGCAACTAAAGGATTCTTTTTGTGATCCTCAATGCCTTGCCAAACAAAATTTATCATTATCTTCTCTAGATTTTTGATTATTCCAGCTAGGGXXXXXXXXXXTTTAGATTTGTTATCATTTATTAATCACTTAGAAGCCTTGGAATAAGACTCCAAAATGTCCTTCAAAGCATAATTTTCACAGAGGGAAGCATCTCCAAAG
* * *
>Marker34195
AGTGGCAGTGCTTTCTATTTAGGAAGTAAATTGGTTTCATGGTAGAGCAAGAAACAAGATTTAGTATCATTATCAACTGTAGAGGTAGAGTATATTGAAGXXXXXXXXXXGCAAACATTTTCACAAAGGCTCTTGCAAAGGACACTTCTGAGTATCTGTAGCAAAAGTTAGGGGTAATTACCCCTCCCTCTTCTTGCTAGATGCATAGTT
AGTGGCAGTGCTTTCTATTTAGGAAGTAAATTGGTTTCATGGTAGAGCAAGAAACAAGATTTAGTATCATTATCAACTGCAGAGGTAGAGTATATTGAAGXXXXXXXXXXGCAAACATTTTCACAAAGGCTCTTGCAAAGGACACTTCTGAGTATCTCTAGCAAAAGTTAGGGGTAATTACCCCTCCCTCTTCTTGCTAGATGCATAGTT
* *
>Marker298909
AAACTTCAAAAAATATTGGGCTCAAATGCACATATACTATCTCAACCATTGGAACTATCTCACCTATTGGGTCTTTTCCCCTATAACTTCGCTGTTTTTGXXXXXXXXXXCATTTCCATTTCCATTGAAGAAAATGACTATTTTTGTCCTCTTATTGTAAATTAAGTAAGATTAATGCTCTTAACGAAGTCCAACTGAATTACAGTAGAG
AAACTTCAAAAAATATTGGGCTCAAATGCACATATACTATCTCAACCATTGGAACTATCTCACCTATTGGGTCTTTTCCCCTATAACTTCGCTGTTTTTGXXXXXXXXXXCATTTTCATTTCCATTGAAGAAAATGACTATTTCTGTCCTCTTATTGTAAATTAAGTAAGGTTAATGCTCTTAACGAAGTCCAACTGAATTACAGTAGAG
* * *
>Marker83255
ACCCTAACAATCCTAGTTAGATCTCTACAACCTTTAAGGACACACACCTTCTTATTGATGTCTCTACCTTCCTTAATAAATTCTAAATATTATTAAAGGAXXXXXXXXXXTAGATGCCAGATATGCCACAAACATCAATTACAATTATTTTGAAAGTAGGGTGGCTGTCTGATGAGGAATTCGATGAGTGGACAAAAATATTTGCAAAAG
ACCCTAACAATCCTAGTTAGATCTCTACAACCTTTAAGGACACACACCTTCTTATTGATGTCTCTACCTTCCTTAATAAATTCTAAATATTATTAAAGGAXXXXXXXXXXTAGATGCCAAATATGCCACAAACATCAATTACAATTATTTTGAATGTAGGGTGGCTGTCTGATGAGGAATTCGATGAGTGGACAAAAATATTTGCAAAAG
* *
>Marker36496
CTTATGGTAACCGGATGCAAGTTGAGTAAAGATGATGATTGTTGGAGTCTGAGATAGGGGGGGTAATCAGTATTGTGTAAAAACACAATTTTTACAACTTXXXXXXXXXXTTGTGATTGCCTCACTGACTTACAGAAAGTCTCACTGACTTCTCACAAACACTTTGGTTGCACATACAAATCTTTTCAGGGGATTACCTTGTTTCAATCA
CTTATGGTAACCAGATGCAAGTTGAGTAAAGATGATGATTGTTGGAGTCTGAGATAGGGGGGGTAATCAGTATTGTGTAAAAACACAATTTTTACAACTTXXXXXXXXXXTTGTGATTGCCTCACTGACTTACAGAAAGTCTCACTGACTTCTCACAAACACTTTGGTTGCACATACAAATCTTTTCAGGGGATTACCTTGTTTCAATCA
*
>Marker410891
CTTGTTTATCAAGGAAAAATGAGACTCAACTAAGCCTTTTATCAAACCCTAGGTTAAGTATGAGTAAAACCCTAGTTATGAGACAATCAACTTGAAACAAXXXXXXXXXXACCATGCAAGTCTCTCTAGAGAGATAATCCAAAACTATTCCTAGATCCTGAAACTGTAGTTCCTACACTACCTTCCTATAGCTCCACTTTTCCTGAAACC
CTTGTTTATCAAGGAAAAATGAGACTCAACTAAGCCTTTTATCAAACCCTAGGTTAAGTATGAGTAAAACCCTAGTTATGAGACAATCAACTTGAAACAAXXXXXXXXXXACCATGCAAGTCTCTCTAGAGAGATAATCCAAAACTATTCCCAGATCTTGAAACTGTAGTTCCTACACTACCTTCCTATAGCTCCACTTTTCCTGAAACC
* *
>Marker159127
ACAATTACACAGAACCATACACTGTTACTAGAAACTTTTAACCATCTTGAACTTCAATTTGAAAAATAGCATATTCAAAGAATTATCCAACTGCTTAAAAXXXXXXXXXXAGCAAGTTGAAACATCCATTTATAAGGTCTAAAATTCATAAAGAAAAAAAGAATAGATATTCAGAACCAAGTAAGCATCCCTAACAGCACCAAAAGAATA
ACAATTACACAGAACCATACACTGTTACTAGAAACTTTTGACCATCTTGAACTTCAATTTGAAAAATAGCATATTCAAAGAATTATCCAACTGCTTAAAAXXXXXXXXXXAGCAAGTTGAAACATCCATTTATAAGGTCTAAAATTCATAAAGAAAAAAAGAATAGATATTCAGAACCAAGTAAGCATCCCTAACAGCACCAAAAGAATA
*
>Marker277262
TTGAACTCACAAATTTTAGTTCAACATCATACATAAATAAGGATATGTTTTGTCCATACACCCTTTGGCACATACCATACACATATTAAAAGTAAAAGTAXXXXXXXXXXAATGTCCATAATTCTCAATACTTATTTTTGGTTTCTTCTTCAATTTGGGGGAACATGAGTATGAAAAACAATAAATTACTAATCTATTTAAGTGAAAACA
TTGAACTCACAAATTTTAGTTCAACATCATACATAAATAAGGATATGTTTTGTCCATACACCCTTTGGCACATACCATACACATATTAAAAGTAAAAGTAXXXXXXXXXXAATGTCCATAATTCTCAATACTTATTTTTGGTTTCCTCTTCAATTTGGGGGAACATGAGTATGAAAAACAATAAATTACTAATCTATTTAAGTGAAAACA
*
>Marker123879
GTTGTTAAGACAGTAGGTGTCTTTAAAGGTTTGGAACTCACTTTACATGCATGCCCTGGCTGATCTGTTTCACAAGATATCTCAATCATAGACCTCCCAAXXXXXXXXXXGGCTGCAACAACAGTAGAGGAGATCCCTAATATACTACTGGATGAGTGGGCTAATTGCTTTCAGTTTGACACTCCTAATCACATAGAGAATACAGGGTTG
GTTGTTAAGACAGTAGGTGTCTTTAAAGGTTTGGAACTCACTTTACATGCATGCCCTGGCTGATCTGTTTCACAAGATATCTCAATCATAGACCTCCCAAXXXXXXXXXXGGCTGCAACAACAGTAGAGGAGATCCCTAATATACTAATGGATGAGTGGGCTAATTGCTTTCAGTTTGACACTCCTAATCACATAGAGAATACAGGGTTG
*
>Marker210848
CTACTATCACAAAAAACAAGATCAAGGAAACTTGGAGCCTCAAAACAATACAAATCCATAAATGGTGACATTCCAATAAACATGTGACACATAGTATTATXXXXXXXXXXTGGCATTTAGTTTGAGGTGGCATTGTCACATGTCATCCTACTTGTAATATGCTTTGGATAGTCAAGTCAAACATGTGGATTTGGGCGTCCCATTTGAGGT
CTACTATCACAAAAAACAAGATCAATGAAACTTGGAGCCTCAAAACAATACAAATCCATAAATGGTGACATTCCAATAAACATGTGACACATAGTATTATXXXXXXXXXXTGGCATTTAGTTTGAGGTGGCATTGTCACATGTCATCCTACTTGTAATATGCTTTGGATAGTCAAGTCAAACACGTGGATTTGGGTGTCCCATTTGAGGT
* * *
>Marker279115
TGTGGTGAGTTGTCATTCCATTTTGGCAAACGAGTGGGTGATTTCTTGCCAGAGATTTTGGGTCATGAGTATTCTGTGGTTTTTTAATCTATGGGAGAAAXXXXXXXXXXGAGACACCAAATTGACATTTCTGCATGCTATAAATGTGTAGGAAGAAGGCTTCCTCAAGAAACTGGAGCTACAACATTTTGGCATCTTGTTATTCTGAAG
TGTGGTGAGTTGTCATTCCATTTTGGCAAACGAGTGGGTGATTTCTTGCCAGAGATTTTGGGTCATGAGTATTCTGTGGTTTTTTAATCTATGGGAGAAAXXXXXXXXXXGAGACACCAAATTGACATTTCTGCATGCCATAAATGTGTAGGAAGAAGGCTTCCTCAAGAAACTGGAGCTACAACATTTTGGCATCTTGTTATTCTGAAG
*
>Marker114868
ACTACCTATACTAGTGGAGCTTGTTGTCACCTCCTCCTCACCAGCCTCTCCATCCCAATCTCCCCTATTTCCCCAGGCCTTGTCAACCAAGTCAGCCTA-----------G-XXXXXXXXXXTGCCTAGCATAGACAAGCTCCGCATCCTCTTCCTCCCATCTCTCACAACCTAGCCATGGCCTCCATATAAACATATCGGCCTCATCTAGAGCCTGCCTCC
#NAME?
*
>Marker245679
AAAGATCTCTCACAAATGGAGAAAAGGAGAAAACCTCATGGGAAAAAACTCCTCCCCAAAAGATAGAAAAAACCTCCCTACAATATAGAGGGAGAGAGAGXXXXXXXXXXATATGGCACATCAAAAGGTAATAATAGTCTGAAAAACTCTGATCAATTTGAAGAAGAGAGAAGGTCACCTCCAAAGTGAAACCAAGGAAGCATTAGCACA
AAAGATCTCTCACAAATGGAGAAAAGGAGAAAACCTCATGGGAAAAAACTCCTCCCCAAAAGAGAGAAAAAACCTCCCTACAATATAGAGGGAGAGAGAGXXXXXXXXXXATATGGCACATCAAAAGGTAATAATAGTCTGAAAAACTCTGATCAATTTGAAGAAGAGAGAAGGTCACCTCCAAAGTGAAACCAAGGAAGCATTAGCACA
*
>Marker64268
TCT---CTCCAAAGCATCTGTTTATATAATAAATACAAGGCAAAAATGGCTCCTCATTGGGATGGGCGTCCAACATGGCCTCATGGCCCAAAACCCACGCCTAXXXXXXXXXXTTCGACACATGTCTTCACCTGTCATAGAATCTCCTATTTATGACTCTTACATGTCATAACTTTGTCATAGGAATCTGTCATGACCGTTGACAAGGGTCAT
TCTCCTCTCCAAAGCACCTGTTTATATAATAAATACAAGGCACAAATGGCTCCTCATTGGGATGGGCGTCCAACATGGCCTCATGGCCCAAAACCCATG-C--XXXXXXXXXXTTCGACACATGTCTTCACCTGTCATAGAATCTCCTATTTATGACTCTTACATGTCATAACTTTGTCATAGGAATCTATCATGACCGTTGACAAGGGTCAT
* * * *
>Marker176305
AAAATGTCCTCACAAGTGGGAACAACTTTAGGGGAGGGATCCAAATCATAGGGTGGAATAGACAAAGCTAGGTCACCATCACATGTATTAGAGTCTAGATXXXXXXXXXXTCAAGATCTTTGATATAAGCATGCAAAGAAACCAAAGAGAAATGACATGGAGATGCCATAATGAAATGTCTTGTAACAACAATATACAATTGATTTATCA
AAAATGTCCTCACAAGTGGGAACAAATTTAGGGGAGGGATCCAAATCATAGGGTGGAATAGACAAAGCTAGGTCACCATCACATGTATTAGAGTCTAGATXXXXXXXXXXTCAAGATCTTTGATATAAGCATGCAAAGAAACCAAAGAGAAATGACATGGAGATGCCATAATGAAATGTCTTGTAACAACAATATACAATTGATTTATCA
*
>Marker112751
GTTCCATTAATAGCTCAGTATACAGACTCAAATGTCTTCATAATGTTTGTTCTGCTTTTCTGCTCTATTTTACATATGCTCTGCCCTTCTACTTTTACTAXXXXXXXXXXCATATAGGTTAAGATCAATCATGCAACCACTTAGATTGATTATTCAAACAATATATCTTTTCCGCATATAGATCTAACATGCATGTCGACTTGTCCCTTA
GTTCCATTAATAGCTCAGTATACAGACTCAAATGTCTTCATAATGTTTGTTCTGCTTTTCTGCTCTATTTTACATATGCTCTACCCTTCTACTTTTACTAXXXXXXXXXXTATATAGGTCAAGATCAATCATGCAACCACTTAGATTGATTATTCAAACAATATATCTTTTCCGCATATAGATCTAACATGCATGTCGACTTGTCCCTTA
* * *
>Marker211639
AGCATTTTAGAGTTATGATTGGATGTTTAGTATATGTTTATAGATGTTAATTTTGTGGAAAATAAATGCTTCCTATAAGAAATAACCTAAGGTAAATATAXXXXXXXXXXTTTCTCTACTTTGGGTCATTTACTTGCTACAAAAATGACCTTGACACTTACAAATTTGAACCTAATATGTAGACTCACCCCTTAACTACAAAAAAACTTA
AGCATTTTAGAGTTATGATTGGATGTTTAGTATATGTTTATAGATGTTAATTTTGTGGAAAATAAATGTTTCCTATAAGAAATAACCTAAGGTAAATATAXXXXXXXXXXTTTCTCTACTTTGGGTCATTTACTTGCTACAAAAATGACCTTGACACTTACAAATTTGAACCTAATATGTAGACTCACCCCTTAACTACAAAAAAACTTA
*
>Marker119683
TCATCTATGGCATACACTTCTTTCCTTAAAGGATCAAGAGTGTGCCTAGGCCCACCTCCTCTATCATTAGGGGGAACTAGTTTCCCATCTTGCCAATTTGXXXXXXXXXXCTATTATTCTTAATATGTAAAGATGCTCTAAAAGCATCCTTGAGAGTTTGTGGTTCTCTATTTCTCAAGTCATACCCCATCTTGGGATCATAAGCATTTT
TCATCTATGGCATACACTTCTTTCCTTAAAGGATCAAGAGTATGCCTAGGCCCACCTCCTCTATCATTAGGGGGAACTAGTTTGCCATCTTGCCAATTTGXXXXXXXXXXCTATTATTCTCAATATGTAAAGATGCTCTAAAAGCATCCTTGAGAGTTTGTGGTTCTCTATTTCTCAAGTCATACCCCGTCTTGGGATCATAAGCATTTT
* * * *
>Marker215820
GAATTCTTGGATCAAATTTTTACATGCCTATGCATTTTCATGGCTCCAGGAGATGATTTGATCAGTTTTAAAAAGTGATTCTGGATGCTACTTGACCTATXXXXXXXXXXGTTTGTTCCAACGAACTGGACACTTGATACAAGTGTGACAAGACCACCTCCTCTATTGAGTGAAGCTGACTTGTTAGGTTGTATTTATAAGGTAGGCATT
GAATTCTTGGATCAAATTTTTACATGCCTATGCATTTTCATGGCTCCAGGAGATGATTTGATCAGTTTTAAAAAGTGATTCTGGATGCTACTTGACCTATXXXXXXXXXXGTTTGTTCCAACGAACTGGACACTTGATACAAGTGTGACAAGACCACCTCCTCTATTGAGCGAAGCTGACTTGTTAGGTTGTATTTATAAGGTAGGCATT
*
>Marker68909
AATCCTGATCAACATTGAAAACTTGCCAGTGACAAATATTGTTAGGGATAGAAGGTCTAGTCAATACCTCCACCTGTGAGATTCCTACTATTGTCGAGTCXXXXXXXXXXTTTCAATACTAAGAGAAGTGTCTCATATTCAGAAACATTATTGATGCATTCAAAGCTAAGTTTGAATAATGATCTATATGTTTTATCAGAAGGAGAAATG
AATCCTGATCAACATTGAAAACTTGCCAGTGACAAATATTTATAGGGATAGAAGGTCTAGTCAATACCTCCACCTGTGAGATTCCTACTATTGTCGAGTCXXXXXXXXXXTTTCAATACTAAGAGAAGTGTCTCATATTCAGAAACATTATTGATGCATTCAAAGCTAAGTTTGAATAATGATCTATATGTTTTATCAGAAGGAGAAATG
**
>Marker265766
ACTACTTTGTATTCATGCTTCATTCTTCATGGTGAAGACATTCACGATTAAAGTTGCTATCACAACTAGACATGCATCTTAGTATCAAAATAAATCATTAXXXXXXXXXXGTGCCCAGAGAAAAATAATCATGTGACACATAAGACAAATGGATAAAATTAAGCATGGAAGATGATTAAATATCACAAGAAAACTATGATAAATAGAGTT
ACTACTTTGTATTCATGCTTCATTCTTCATGGTGAAGACATTCACGATTAAAGTTGCTATCACAACTAGACATGCATCTTAGTATCAAAATAAATCATTAXXXXXXXXXXGTGCCCAGAGAAAAATAATCATGTGACACATAAGACAAAGGGATAAAATTAAGCATGGAAGATGATTAAATATCACAAGAAAACTATGATAAATAGAGTT
*
>Marker522681
TGATTTATTGTTCATTAGAATCTATAGCAGTAAGTTATGGTGCATGAGAATCTCTGTTAACTTTCAGTGGAGTTTTGGTAATGATATTGGTCATTATACCXXXXXXXXXXGATCTTCATGTTAATTGAAGAGGTGTTAAAATCTTGTTTTAGTGAGGACTCTTAGAGTTTTTGGTAAAGGTGTTATTGTTCTTCCTTTTGGAGAGGATGA
TGATTTATTGTTCATTAGAATCTATAGCAGTAAGTTATGGTGCATGAGAATCTCTGTTAACTTTCAGTGGAGTTTTGGTAATGATATTGGTCATTATACCXXXXXXXXXXGATCTTCATGTTAATTGAAGAGGTGTTAAAATCTTGTTTCAGTGAGGACTCTTAGAGTTTTTGGTAAAGGTGTTATTGTTCTTCCTTTTGGAGAGGATGA
*
>Marker166905
TTTGCTTTTGTAATAGCATACTCTTGCGCCTTTAGTTGTTCTTGCAGAGATACCTACTTAATTGTCTGGCTATCCAACTCTTCATTATATGCTTCAATTTXXXXXXXXXXCATTACATCTCTTCAATATATCTACTTCAAACCTTATGTCTTTGAACCAATTATCTAGTTGTGGTAACATTTGAGGTGTCAGGATATTCTTTGTCATAAG
TTTGCTTTCGTAATAGCATACTCTTGCGCCTTTAGTTGTTCTTGCAGAGATACCTACTTAATTGTCTGGCTATCCAACTCTTCATTATATGCTTCAATTTXXXXXXXXXXCATTACATCTCTTCAATATATCTACCTCAAACCTTATGTCTTTGAACCAATTATCTAGTTGTGGTAACATTTGAGGTGTCAGGATATTCTTTGTCATAAG
* *
>Marker157270
TTGGTATTGTATCCGGAGATCATTGAAGACTATCTCCGGAGATGCACAAAATTGCTGTTCCTAGCATCTACACCTGTTGATTCAAAAAGAGAGAAGTTTCXXXXXXXXXXCGAAATGGGCATGTGAAGAACTTCCATTCCATGGCATTTTGTAATGTGGGTATTGCATATTTGAGATTATTGATGCCTTATAAATGAAATAGTCTTTGTG
TTGGTATTGTCTCCAGAGATCATTGAAGACTATCTCCGGAGATGCACAAAATTGCTGTTCCTAGCATCTACACCTGTTGATTCAAAAAGAGAGAAGTTTCXXXXXXXXXXCGAAATGGGCATGTGAAGAACTTCCATTCCATGGAATTTTGTAATGTGGGTATTGCATATTTGAGATTATTGATGCCTTATAAATGAAATAGTCTTTGTG
* * *
>Marker440640
AGTCGACAGGACTTTTGGCACTTGAGTAATTTGGACATGCTTAACATCGGTGACTCCATCATTAACCACATGTTTGTTCTTGGCCCAAGGTTTGAATTTAXXXXXXXXXXATTGCTTAGCATTACAAAGGTGTAGCATTGTGAGTTCATGTTCAACATTGTAGGAGAAATGAGAGACAAATTTTTAGGAAAAGTCAGCGAAAGTTGTGAC
AGTCGACAGGGCTTTTGGCACTTGAGTAATTTGGACATGCTTAACATCGGTGACTCCATCATTAACCACATGTTTGTTCTTGGCCCAAGGTTTGAATTTAXXXXXXXXXXATTGCTTAGCATTACAAAGGTGTAGCATTGTGAGTTCATGTTCAACATTGTAGGAGAAATGAGAGACAAATTTTTAGGAAAAGTCAGCGAAAGTTGTGAC
*
>Marker259074
TTGATTATCAAAGATAAATGTGTGATTTTATTATCCATGCTACATCATTCACATACATACATAGAGAACATACAATTCTATAGAAGTAAAATTGAAAATAXXXXXXXXXXTCTCTCCTAGAGCATCATAATGATCCCCCTAAGACATCTAATCTACTCAAATGTAAGGTTTTCTACCTTTGTCTAACTTGCTTGCATAACCACTTGTGAT
TTGATTATCAAAGATAAATGTGTGATTTTATTATCCATGCTACATCATTCACATACATACATAGAGAACATACAATTCTATAGAAGTAAAATTGAAAAAAXXXXXXXXXXTCTCTCCTAGAGCATCATAATGATCCCCCTAAGACATCTAATCTACTCAAATGTAAGGTTTTCTACCTTTGTCTAACTTGCTTGCATAACCACTTATGAT
* *
>Marker457865
GATCATATTATTTTAAGATGGAAACATCATATAAATCTGGAAATGTAACCTAACACATGAATAGAAAATAATTGTGTGAATGATATAATTATATACCAATXXXXXXXXXXGTGTTAGTGTGCATGAGTTAAGTTATAGAAACAAATAAAATTAGCATTACTCTTTATTTTAACAAAATCACACAAAATATATTTGCAAGAAAATTGTTCT
GATCATATTATTTTAAGATGGAAACATCATATATATCTGGAAATGTAACCTAACACATGAATAGAAAATAATTGTGTGAATGATATAATTATATACCAATXXXXXXXXXXGTGTTAGTGTGCATGAGTTAAGTTATAGAAACAAATAAAATTAGCATTACTCTTTATTTTAACAAAATCACACAAAATATATTTGCAAGAAAATTGTTCT
*
>Marker324154
TCTTAATAAAGCTCCATTTTCTCCTAAGATTACACATTCACTACCATTGCTTTGGGAAAGCTATCAAGGGATGAAGGGAAATAACTCACTAGATCTTCAGXXXXXXXXXXACATAAGAGCAGAAACATAATCAACACACTTGACATCAAGATTTTGACAAGGAAACCCGGTTAAGGGAAAAACCACAGTGGGGGTTAACCCACAAATATT
TCTTAATAAAGCTCCATTTTCTCCTAAGATTACACATTCACTACCATTGCTTTGGGAAAGCTATCAAGGGATGAAGGGAAATAACTCACTAGATCTTCAGXXXXXXXXXXACATAAGAGCAAAAACATAATCAACACACTTGACATCAAGATTTTGACAAGGAAACCCAGTTAAGGGAAAAACCACAGTGGGGGTTAACCCACAAATATT
* *
>Marker576298
TTTATGTAGAATACATCTTAAATTTAATGTTTTAATGCACAATTAAAAAAACTAATCTTTTATTAGAAATAGCTCTAGAATTATTATTAATAATAAAAACXXXXXXXXXXTATAGGAGTTAGAGGTTAGTTTATTATCATCATATTATGAATTGTGTTCTTATTGGAGACTTTTGGAGGTTTGTCCCCTCAAAGTGGCTTATTAATCTCA
TTTATGTAGAATACATCTTAAATTTAATGTTTTAATGCACAATTAAAAAAACTAATCTTTTATTAGAAATAGCTCTAGAATTACTATTAATAATAAAAACXXXXXXXXXXTATAGGAGTTAGAGGTTAGTTTATTATCATCATATTATGAATTGTGTTCTTATTGGAGACTTTTGGAGGTTTGTCCCCTCAAAGTGGCTTATTAATCTCA
*
>Marker219980
TTATCCTGTTTATTCTTTAGAGCAAACTTCATGTTTTCTTATTTTTGAGGTCTCTCACAAGGAATAAAGGACCTTTTCTTGCATCAGGTATTTAGAAATCXXXXXXXXXXATTATGTGTTTATGCATTCTTCGATTATTCTTATGAGCAAGGCCCATGGTTAGTGTCCTTTGCTTTAGTGTAATTTTAAGGATGTGTTGATGTGGAAACA
TTATCCTGTTTATTCTTTAGAGTAAACTTCATGTTTTCTTATTTTTGAGGTCTCTCACAAGGAATAAAGGACCTTTTCTTGCATCAGGTATTTAGAAATCXXXXXXXXXXATTATGTGTTTATGCATTCTTCGATTATTCTTATGAGCAAGGCCCATGGTTAGTGTCCTTTGCTTTAGTGTAATTTTAAGGATGTGTTGATGTGGAAACA
*
>Marker515710
GTTCCTCTATATCCTATCTATTTCATTATATTGTATCCAATACCATATATTTGTTTGAATGATTTCTTAGGAGGAGGTGATGATGATTTGTGAGATGTCTXXXXXXXXXXGTATCAATTTGATTATAATGGTAAAGTAGTCTTCAATCTATGTTAGCACAAAAAAATTTCCCCTTATACCAAATTTAACACATTGATACAATGTCTAGAG
GTTCCTCTATATCCTATCTATTTCATTATATTGTATCCAATACCATATATTTGTTTGAATGATTTCTTAGGAGGAGGTGATGATGATTTGTGAGATGTCTXXXXXXXXXXGTATCAATTTGATTATAATGGTAAAGTAGCTTTCAATCTATGTTAGCACAAAAAAATTTCCCCTTATACCAAATTTAACACATTGATACAATGTCTAGAG
**
>Marker369123
TTTCTAAGGAAGGACCATTTGACCTTATCATATAAGCCTTGGACATGCCAAGGTTGATAAACATAGCTTTATTTTTAGAGAAACCCATAGAATGAATGGCXXXXXXXXXXCTTTCTTCTATTTTGGTGGATTGACCATGTTGTTCCTTGGAGTAGGTTGATATTCTTACTTAGGGCTATGATCCTAAAGCAGTTTATTCAGTTTCTCTTT
TTTCTAAGGAAGGACCATTTGACCTTATCATATAAGCCTTGGACATGCCAAGGTTGATAAACATAGCTTTATTTTTAGAGAAACCCATAGAATGAATGGCXXXXXXXXXXCTTTATTCTATTTTGGTGGATTGACCATGTTGTTCCTTGGAGTAGGTTGATATTCTTACTTAGGGCTATGATCCTAAAGCAGTTTATTCAGTTTCTCTTT
*
>Marker182831
AGTTCTATAGTTAAGTCCTCCTCCATTTGGCAATGATTTGGCTTGGTCTTGTCCTTGAATGTTATTGTGGAAGAGGGTTTGATCTAGAGTGCACACTATTXXXXXXXXXXTTAGTGTATTTAGTGTTATAGGACTTTGTATGAGTTGTATAACCCACTGCCTTAATAAAAACACATCTTTCTACGAAGAAGTCATAGATTAATGGGTTCT
AGTTCTATAGTTAAGTCCTCCTCCATTTGGCAATGATTTGGCTTGGTCTTGTCCTTGAATGTTATTGTGGAAGAGGGTTTGATCTAGAGTGCACACTATTXXXXXXXXXXTTAGTGTATTTAGTGTTATAGGACTTTGTATGAGTTGTATAAACCACTGCCTTAATAAAAACACATCTTTCTACGAAGAAGTCATAGATTAATGGGTTCT
*
>Marker347460
AATGATACTGATCCAATTAGTATAACTAGTAAATGACATTCATCACCTTACCCTTCTCATCATAACTTCTCTAATCCATCTTCTTTGTCTTCTTCTCTGAXXXXXXXXXXTTGTAGTTTGTGATTAAACCTTGACATGGCCTCTTCTTCTAGCAATTGTTCTTTATTGACCTATCTTTATAGTCTCCTTACTGTTCTGCCCCCTCTGTTA
AATGATACTGATCCAATTAGTATAACTAGTAAATGACATTCATCACCTTACCCTTCTCATCATAACTTCTCTAATCCATCTTCTTTGTCTTCTTCTCTGAXXXXXXXXXXTTGTAGTTTGTGATTAAACCTTGACATGGCCTCTTCTTCTAGCAATTGTTCTTTATTGACCTATCTTTATAGTCTCCTTACTGTTCTACCCCCTTTGTTA
* *
>Marker224675
TGGACTACAAGGCCCATAGCTGACTAATTCTGGCTCATACGCTCCTGTTGTTGGCTGAGTTGTTCTATCTGTTGCTCAGTCCAATTCTGCTTCTTCGTGAXXXXXXXXXXGAAACACTCAGATTGTATCCTTGAAATCCTCTATCAATGGAGGTAAAATCAGTTGGTAGTGGCAACTGCAGTGCTGGCAAATATTATTAAGAATTGGACA
TGGACTACAAGGCCCATAGCTGACTAATTCTGGCTCATACGCTCCTGTTGTTGGCTGAGTTGTTCTATCTGTTGCTCAGTCCAATTCTGCTTCTTCGTGAXXXXXXXXXXGAAACACTCAGATTGTATCCTTGAAATCCTCTATCAATGGAGGTAAAATCAGTTGGTAGTGGCAACTGCAGTGCTGGCAAATATTATTAAGAATCGGACA
*
>Marker464235
TAGAATGAATAAAGGATGGAACCTTAGATTCATCTCACTAGATGTGTTAGAAAACTATTGATGCTTAGATATTGTAACTACATGATGCATTAGCCAAGTGXXXXXXXXXXTTGGATGATGAAAGGATGGAATTGATATTTTCATGGTTATCAATATGCGCAAGGTGATCTGCTCATAAGAGATCAATAGATCCCAAACACAGAGATCAAG
TAGAATGAATAAAGGATGGAACCTTAGATTCATCTCACTAGATGTGTTAGAAAACTATTGATGCTTAGATATTGTAACTACATGATGCATTGGCCAAGTGXXXXXXXXXXTTGGATGATGAAAGGATGGAATTGATATTTTCATGGTTATCAATATGCGCAAGGTGATCTGCTCATAAGAGATCAATAGATCCCAAACACAGAGATCAAG
*
>Marker382383
ACCACTCATGAGCAATTCCTTCCAAGTGAAGTGTTGTAAACTTAATGGCTTCATCTTCCGCCATTGGTGTAAGTGACAAATAGGTATCCAATTTTTGAATXXXXXXXXXXCTCTACGGATGAAAGTAGGCTGAAATGGCCTAGCAACAGACCCAATAGCCGTTCTGGTGGTCTGATTTATGTTTTATGTGTGTTGATTTATAGCCCTTTA
ACCACTCATGAGCAATTCCTTCCAAGTGAAGTGTTGTAAACTTAATGGCTTCATCTTCCGCCATTGGTCTAAGTGACAAATAGGTATCCAATTTTTGAATXXXXXXXXXXCTCTACGGATGAAAGTAGGCTGAAATGGCCTAGCAACAGACCCAATAGCCGTTCTGGTGGTCTGATTTATGTTTTATGTGTGTTGATTTATAGCCCTTAA
* *
>Marker192440
TACCTTTCACATGTAGACTACCATCCCCGAGGGGGCAAATATGTAAGCACTAAAAATGTGCATGGGCTTGCACGAGGACCCTACGATGAGTTGTAATCCTXXXXXXXXXXTAAATGACCTCCCAAATCAAACCTATCTTTCATAATTGACTTAACTATTATCATTTCCAGATCCACCTAATATTTATGGATCCCCTGTGGGTCCCCCTTG
TACCTTTCACATGTAGACTACCATCCCCGAGGGGGCAAATATGTAAGCACTAAAAATGTGCATGGGCTTGCACGAGGACCCTACGATGAGTTGTAATCCTXXXXXXXXXXTAAATGACCTCCCAAATCAAACCTATCTTTCATAATTGACTTAACTTTTATCATTTCCAGATCCACCTAATATTTATGGATCCCCTGTGGGTCCCCCTTG
*
>Marker471209
TGTTTATTCTTTTGCATGGTTGATTCTAAATACTTGTTTGCATATTTTTCTCTCTTTGGGTTATGTGAAAATGTTTTATATTGCTACAAATTTTTCCTTTXXXXXXXXXXCCTATAATTTGTTTCCCTTTCACAAATCGTCCTTGCTCCCCCAAATTGAGGATAGGCAATAGAATTTTTAGTTTGTTGGAAATCACTTTTGATATGAGTT
TGTTTATTCTTTTGCATGGTCGATTCTAAATACTTGTTTGCATATTTTTCTCTCTTTGGGTTATGTGAAAATGTTTTATATTGCTACAAATTTTTCCTTTXXXXXXXXXXCCTATAATTTGTTTCCCTTTCACAAATTGTCCTTGCTCCCCCAAATTGAGGATAGGCAATAGAATTTTTAGTTTGTTGGAAATCACTTTTGATATGAGTT
* *
>Marker369971
TATCTATACATATATGTGACCTAGAGATCTTTCACCTCTTTCCCTTTTCTACCTTAAAATCAATTGCATACTCTTGGTTTATACAATTATTTTAAGGGAGXXXXXXXXXXCAACGTTTGCTAGTGTTTATGATTCATGAAGGTATTGTATGGCTCCTAGCAATAATGCATGCTAGACCTTGAACCATACCCCACATTCTCCTAACAAAAA
TATCTATACATATATGTGACCTAGAGATCTTTCACCTCTTCCCCTTTTCTACCTTAAAATCAATTGCATACTCTTGGTTTATACAATTATTTTAAGGGAGXXXXXXXXXXCAACGTTTGCTAGTGTTTATGATTCATGAAGGTATTGTATGGCTCCTAGCAATAATGCATGCTAGACCTTGAACCATACCCCACATTCTCCTAACAAAAA
*
>Marker332355
AAAGGATCTTAAGCCTAGAAGAAAGGGTCAACTTTTCTTTGATGCACACAAAACCACAACAAGAATCATTCATTACAAAGGCTTCAAAATAACACACATGXXXXXXXXXXTCTCTCAGTCCCTAGCTTGTAACCTAGGAGGTTATATTCAATAAATTCTGAATATATAGTAATCTGACAAGTTGTTGAAAGCTTCAGTGTTGTATCTCTT
AAAGGATCTTAAGCCTAGAAGAAAGGGTCAACTTTTCTTTGATGCACACAAAACCACAACAAGAATCATTCATTACAAAGGCTTCAAAATAACACACATGXXXXXXXXXXTCTCTCAGTCCCTAGCTTGTAACCTAGGAGGTTATATTCCATAAATTCTGAATATATAGTAATCTGACAAGTTGTTGAAAGCTTCAGTGTTGTATCTCTT
*
>Marker178589
CCACCTATGACAAGGATTTCTATGCTATTGTGCAAGCCTGCAAACAATCAAAACACTACATTTTGGGGAAGAAGACTATCATTGGAAAGCTACAAAATGAXXXXXXXXXXTGGGACACATATGTGTTCCAACCAAGAAGCAGAAAAAGATGATATGGGAGGCACACTACAACCATGTTGTAGGACACTTTGGGGTGGAGAAGACTGTTGT
CCAGCTATGACAAGGATTTGTATGCTATTGTGCAAGCCTGCAAACAATCGAAACACTACATTTTGGGGAAGAAGACTATCATTGGAAAGCTACAAAATGAXXXXXXXXXXTGGGACACATATGTGTTCCAACCAAGAAGCGGAAAAAGATGATATGGGAGGCACACTACAACCATGTTGTAGGACACTTTGGGGTGGAGAAGACTGTTGT
* * * *
>Marker401060
CTTGACTTAAATTTTAAGTTATAGTATTATAACCATGTTCAACATCATATAAATTACAACCAGCTTTTTTTCGAGGGTTTTTATATCAAACCCACATAATXXXXXXXXXXCATTGTAATAATTTATATCTATCTAGTGCTAGTATATATGAATGCAACTATTAAATGTGAATTTAACACTAAAAATGTAAAGAGTCAGAGACTAGAGAGA
CTTGACTTAAATTTTAAGTTATAGTATTATAACCATGTTCAACATCATATAAATTACAACCAACTTTTTTTCGAGGGTTTTTATATCAAACCCACATAATXXXXXXXXXXCATTGTAATAATTTATATCTATCTAGTGCTAGTATATATGAATGCAACTATTAAATGTGAATTTAACACTAAAAATGTAAAGAGTCAGAGACTAGAGAGA
*
>Marker396484
TTATTTTCAGCAGTTGAAATAAAATTTCAGAATTTATTTGTAGTCTCCAATCTGCTGTTTCGCCATTCATATGTTCAGATTTGAATCTGTTTTGATCATGXXXXXXXXXXGTTGGAAACTACTTTTAGGTTAAGTGGCAGTGCAACCACTACTCTTCTCCTCCCGTTCAAAGTTTCTTGAATCCATTCTTCATTGCTTGCACTTGGCCTC
TTATTTTCAGCAGTTGAAATAAAATTTCAGAATTTATTTGTAGTCTCCAATCTGCTATTTCGCCATTCATATGTTCAGATTTGAATGTGTTTTGATCATGXXXXXXXXXXGTTGGAAACTACTTTTAGGTTAAGTGGCAGTGCAACCACTACTCTTCTCCTCCCGTTCAAAGTTTCTTGAATCCATTCTTCATTGCTTGCACTTGGCCTC
* *
>Marker176495
TATAGAGGATGAGAAACATATTGTTCTTGCTCTCCTTGTGATGGATGACAAGAATTTTAACTTTCTTTCTTCTTTTGAGATACATTGGGAGGCAATGAAGXXXXXXXXXXCTCTTAGATGCTAAAGTGCCTTCCAAGTAGCATAGAAAATCTATC--AAAATATGGAATAATATGAAACAAGAATTCAATTTCCTTGAGCCCCACGTGAAGA
TATAGAGGATGAGAAACATATTGTTCTTGCTCTCCTTGTGATGGATGACAAGAATTTTAACTTTCTTTCTTCTTTTGAGATACATTGGGAGGCAATGAAGXXXXXXXXXX--CTTAGATGCTAAAGTGCCTTCCAAGTAGCATAGAAAATCTATCTTGAAATATGGAATAATATGAAACAAGAATTCAATTTCCTTGAGCCCCACGTGAAGA
*
>Marker417516
TTACTTGAGTTCATGAATGTGTCAAATTTCCCTTCAATGGGGTTCTTTGAAGTAACTTAGATAATACCTTACATTCATAGGGTATATCCATGGAAATGGGXXXXXXXXXXTATCACTTAAATATAACATAGTGTTAGGTGTGTTCTACCCCATTTGTTTTTTGCACTATGTATTTTTCAAAACTAGTTGGTGGAAGGATGCATAAGCACT
TTACTTGAGTTCATGAATGTGTCAAATTTCCCTTCAATGGGGTTCTTTGAAGTAACTTAGATAATACCTTACATTCATAGGGTATATCCATGGAAATGGGXXXXXXXXXXTATCACTTAAATATAACATAGTGTTAGGTGTGTTCTACCCCATTTATTTTTTGCACTATGTATTTTTCAAAACTAGTTGGTGGAAGGATGCATAAGCACT
*
>Marker540764
ACTTGCCATACCCAAAGCCTAAGGCAACAACTCCGTCTTGTTTCATGTTTGAAACAATGCATTTCTTCTCATTGAAATTCACTTGTATGTTAGGATTGTCXXXXXXXXXXCGATGGATTATGCACATGTTTAGTATTCATTTCCTTTTGATGCAATCTCTTAACTTATTTACTTGAATTACATTTTCAAAGTGCATATCTCATGAATTGT
ACTTGCCATACCCAAAGCCTAAGGCAACAACTCCGTCTTGTTTCATGTTTGAAACAATGCATTTCTTCTCATTGAAATTCACTTGTATGTTAGGATTGTCXXXXXXXXXXGGATGGATTATGCACATGTTTAGTATTCATTTCCTTTTGATGCAATCTCTTAACTTATTTACTTGAATTACATTTTCAAAGTGCATATCTCATGAATTGT
*
>Marker404061
TCCTCTACCCTCTATAGTTACAGGCCTCTTCTCACCTGCAACAAATTTCTCAGAGCATCTACCTCTCTGCAGTTACAGAATCTCCTCTTTTGCAACAAATXXXXXXXXXXCTTGATGCAGTCGTGACCAGGGGACATTATCAGGCAACCCAATCACACAGCCAAATAACACAACAGGAACAGAGATTCATAAATCATCACACAAGTTGAA
TCCTCTACCCTCTATAGTTACAGGCCTCTTCTCACCTGCAACAAATTGCTCAGAGCATCTACCTCTCTGCAGTTACAGAATCTCCTCTTTTGCAACAAATXXXXXXXXXXCTTGATGCAGTCGTGACCAGGGGACATTATCAGGCAACCCAATCACACAGCCAAATAACACAACAGGAACAAAGATTCATAAATCATCACACAAGTTGAA
* *
>Marker299483
TCCTCTGCTTCATTCTCCCCATCGTTGTCCTTCCTATCACTCTGTTGCTCTAAATGCTCTGAAGCTATCTCCTTAGCAGAATAATACTCCAACTATTTCAXXXXXXXXXXCATCCCCTTAGTGGTTCCATTAGTCCTTAAGTAAATAGGACTATGAGTCTCCTCTCAGATATGTTGGGAACCATCACACTGATCCTCTGGAACTCTGAAA
TCCTCTGCTTCATTCTCCCCATCGTTGTCCTTCCTATCACTCTGTTGCTCTGAATGCTCTGAAGCTATCTCCTTAGCAGAATAATACTCCAACTATTTCAXXXXXXXXXXCATCCCCTTAGTGGTTCCATTAGTCCTTAAGTAAATAGGACTATGAGTCTCCTCTCAGATATGTTGGGAACCATCACACTGATCCTCTGGAACTCTGAAA
*
>Marker396685
ACCTTTTATTACCACTTTGATTATTGCACCAAGTATATCAAATATCCTTATTGTATTTCCTTTCCTTTCCACAAGAGATCAAAGATACTTAACATTCTTTXXXXXXXXXXCAAGCCAATCTATTACAAGGGGAAAAACCCTAGCAAACAACTTTTTCAGACCATTCCTTACTAGAAAGCACAACAAATCTCCCTCTTTCCTTTGGATGGA
ACCTTTTATTACCACTTTGATTATTGCACCAAGTATATCAAATATCCTTATTGTATTTCCTTTCCTTTCCACAAGAGATCAAAGATACTTAACATTCTTTXXXXXXXXXXCAGGCCAATCTATTACAAGGGGAAAAACCCTAGCAAACAACTTTTTCAGACCATTCCTTACTAGAAAGCACAACAAATCTCCCTCTTTCCTTTGGATGGA
*
>Marker336026
ATGGTGTGAATGATCATGATTTTGTAATGTTTTTTGTCATTTATTTCAAGGATCTTTTCTTCCTTTATACTACTCCATTTTCTATGGGATATACAAAATAXXXXXXXXXXTAGGAAAGGGATCTAAAATATCACTATTAATCAACTTTAGGGGTTTTGTTTCTCTCCTAGCCTCTCCTTTATCATATTTCTCTTTAGGATACTTTCCTAA
ATGGTGTGAATGATCATGATTTTGTAATGTTTTTTGTCATTTATTTCAAGGATCTTTTCTTCCTTTATACTACTCCATTTTGTATGGGATATACAAAATAXXXXXXXXXXTAGGAAAGGGATCTAAAATATCACTATTAATCAACTTTAGGGGTTTTGTTTCTCTCCTAGCCTCTCCTTTATCATATTTCTCTTTAGGATACTTTCCTAA
*
>Marker291517
CACAAGCTTAGTTAATGCATCTACAACATTCATCAAAGTCTCTTCATTTTTCAACTTCACCCTATCATCATCGACCATATCTCTCACAAAATGATACCGAXXXXXXXXXXAAAGAGTAAAAACATAAGCACTGGTGGATCTTCTACTATCAACATCCCCTACCTAGTTTGAATCCATATAACCACAAATATTTAGGGAATGCATGTCTCT
CACAAGCTTAGTTAATGCATCTACAACATTCATCAAAGTCTCTTCATTTTTCATCTTCACCCTATCATCATCGACCATATCTCTCACAAAGTGATACCGAXXXXXXXXXXAAAGAGTAAAAACATAAGCACTGGTGGATCTTCTACTATCAACATCCCCTACCTAGTTTGAATCCATATAACCACAAATATTTAGGGAATGCATGTCTCT
* *
>Marker97061
CCCACCCCCTGGGCCCCCCAAACCCTAGGGTTCTTACTACCAAGACCTCGACCCCCTAGTCTCATAAAAAGAAAACTGGTAAAGCCTCCACTGGCGCTAAXXXXXXXXXXTCTCTCCCTTGAGGAAAGTCACAAGGGTGACAATTGGGAGAAGGGTGAAAAGGATGTTATGAAGGGGAAGGATATATCCATTAAAGAGAAGGACAGTGGT
CCCACCCCCTGGGCCCCCCAAACCCTAGGGTTCTTACTACCAAGACCTCGACCCCCTAGTCTCATAAAAAGAAAACTGGTAAAGCCTCCACTGGCACTAAXXXXXXXXXXTCTCTCCCTTGAGGAAAGTCACAAGGGTGACAATTGGGAGAAGGGTGAAAAGGATGTTATGAAGGGGAAGGATATATCCATTAAAGAGAAGGACAGTGGT
*
>Marker284681
ATCATCATCTTGTATACAACATGCAATAACTCTAATAAACCACTGTCATCATCCTGATGAGTAACAAACTCCTTCAAAGAACTGAGATCTCTTAAGACCAXXXXXXXXXXCCTAGAAAATGCATTCTACCAGAGTGAATGAATTGTTGCTAAGAGGGGACAATACACATGATTTAATTTTACGTCCATGAAGCCTTTTCATGCACTTAAT
ATCATCATCTTGTATACAATATGCAATAACTCTAATAAACCACTGTCATCATCCTGATGAGTAACAAACTCCTTCAAAGAACTGAGATCTCTTAAGACCAXXXXXXXXXXCCTAGAAAATGCATTCTACCAGAGTGAATGAATTGTTGCTAAGAGGGGACAATACACATGATTTAATTTTACGTCCATGAAGCCTTTTCATGCACTTAAT
*
>Marker448774
CTTTCCGCTTTTACATTTCAGCAGTGCATTCATACAACTGGATAGTTGTTCAAAACACTGTATGCTCTCACCTTACCCACATTGGGTTCTGGGTGATCGGXXXXXXXXXXAGAGATTCAATTCACAATGAAGGGAAAAAGGAGATAATACAGAAAAAAAGTGAGTATATTAATGTCCATAAATGACTAAATAATTGAATGAGATGCTAAA
CTTTCCGCTTTTACATTTCAGCAGTGCATTCATACAACTGGATAGTTGTTCAAAACACTGTATGCTCTCACCTTACCCACACTGGGTTCTGGGTGATCGGXXXXXXXXXXAGAGATTCAATTCACAATGAAGGGAAAAAGGAGATAATACAGAAAAAAAGTGAGTATATTAATGTCCATAAATGACTAAATAATTGAATGAGATGCTAAA
*
>Marker250999
AGGATGATGGAAATCAAGGCAGAGATAATGATCCACCTCTGGAGCCAGAAAAGGTAGAAATCAATGTGCATGAGGAGACTAATAAGGAGATTTCTGATAAXXXXXXXXXXGAATAGATCAAAATGCATGATCTTCACATGAAGATCAGGTGCCACAAAAAAAACAAGATCAAGAAGTGCAGAATCCTCATGAGGATAAATTGCAAGAGGA
AAGATGATGGAAATCAAGGCAGAGATAATGATCCACATCTGGAGCCAGAAAAGGTAGAAATCAATGTGCATGAGGAGACTAATAAGGAGATTTCTGATAAXXXXXXXXXXGAATAGATCAAAATGCATGATATTCACATGAAGATCAGGTGCCACAAAAAAAACAAGATCAAGAAGTGTAGAATCCTCATGAGGATAAATTGCAAGAGGA
* * * *
>Marker589240
TACCTGGTGACTGGCCTCGTTGTCAGCAGGTTTCACATAAATAAGTCTAAGTATAGGAATGACCAATATCATCATAAACCCTACAATCCATGAAATGAGAXXXXXXXXXXAGTTTGACAGTAGTTTGTTCAACTAACATCATAGACATGCTTATGCATATTAAGTTCACTGCAGTTCTGTAATCTGAATTGAAAGTTATTAGTGGTATTT
TACCTGGTGACTGGCCTCGTTGTCAGCAGGTTTCACATAAATAAGTCTAAGTATAGGAATGACCAATATCATCATAAACCCTACAATCCATGAAACGAGAXXXXXXXXXXAGTTTGACAGTAGTTTGTTCAACTAACATCATAGACATGCTTATGCTTATTAAGTTCACTGCAGTTCTGTAATCTGAATTGAAAGTTATTAGTGGTATTT
* *
>Marker256938
ATAAAAGACATGATCAACACCACACCAAGCATAAGATTAAAGTGGCCGGCAAGGTTTGGTTGTATATGAGAAATTATAGAAGTTCTAAGAAGTATCACAAXXXXXXXXXXAGATGATGCAGTTCTCCAAAAGATGGAGAGGCAAACACATAGGGAGTTGCAAGAAACAT-ATTGGTTGGTTTGAAAGGGCAACTTCCAACAAAGGAAAAAT
ATAAAAGACATGATCAACACCACACCAAGCATAAGATTAAAGTGGTTGGCAAGGTTTGGTTGTATATGAGAAATTATAGAAGTTCTAAGAAGTATCACAAXXXXXXXXXX-GATGATGCAGTTCTCCAAAAGATGGAGAGGCAAACACATAGGGAGTTGCAAGAAACGTGATTGGTTGGTTTGAAAGGGCAACTTCCAACAAAGGAAAAAT
** *
>Marker358390
AACATATATGATATGTAAGGGGGACATCACTATAATTGTATATAGGATTCCCATTTGAAACTCCAAGACTTGTGTTAGCACTACTACTGGGATGTGCAGTXXXXXXXXXXAAATTGTTGAAAACGAGCCAACTCAATGTCTAGTTTCCAAATTTGTGTTTCAAGGATATGAGCCATGAGGCTATATATGTCTATAGAGCCATGAGAATTT
AACATATATGATATGTAAGGGGGACATCACTATAATTGTATATAGGATTCCCATTTGAAACTCCAAGACTTGTGTTAGCACTACTACTGGGATGTGCAGTXXXXXXXXXXAAATTGTTGAAAATGAGCCAACTCAGTGTCTAGTTTCCAAATTTGTGTTTCAAGGATATGAGCCATGAGGCTATATATGTCTATAGAGCCATGAGAATTT
* *
>Marker355571
CCCAGAAGTATGATACACTAGATGAACAACTAAAAACTAGTGGCTAAACCCAACCTATTGACTTGGTTCCAAACATTGTCACTAAACCAAGAACAACTAGXXXXXXXXXXAGACACTATGTGGCTTCATGAGTGTTGTCATTGATGGCAATAAAGTTCATCCCACCCATCCACAGGACATGGTATGTCTTTACTGGAAGTCAGATTGAAG
CCCAGAAGTATGATACACTAGATGAACAACTAAAAACTAGTGGCTAAACCCAACCTATTGACTTGGTTCCAAACATTGTCACTAAACCAAGAACAACTAGXXXXXXXXXXAGACACTATGTGGCTTCATGAGTGTTGTCATTGATGGCAACAAAGTTCATCCCACCCATCCACAGGACATGGTATGTCTTTACTGGAAGTCAGATTGAAG
*
>Marker198745
TCTTTGAAGATGAGATAGAAGTTTTCTCTAGCAAGGTGTCAAAGCCTCCAAGGAAAGGGGTATTGGGTGCAACACCTTTATCCCTAGCTATCTACTCAGGXXXXXXXXXX--------CCTTCCAAAATAGCAAAAACACCACAAAATCCAAAAATCCAAAAATCCAAAAATATTACTCTTAAAATTTTCCATTTGATGGCATTTTCCTTTTCCAAAA
TCTTTGAAGACGAGATAGAAGTTTTCTCTAGCAAGGTGTCAAAGCCTCCAAGGAAAGGGGTATTGGGTGCAACGCCCTTATCCCTAGCTATCTACTCAGGXXXXXXXXXXAACTACTACCTTCCAAAATAGCAAAAACACCAC--------AAAATCCAAAAATCCAAAAATATTACTCTTAAAATTTTCCATTTGATGGCATTTTCCTTTTCCAAAA
* * *
>Marker496779
ACATTGGTGCAGGTCGTGGGCTTTCATGATCAGCAAATACTCTTCCATTGTCTCGTTTATTCAGCAGTTGGGGACGCCTAGGGTTTGTTATTGAGCTGCCXXXXXXXXXXCATTATCAAAACAAAGGCAAAAAATTTGTGTTTGGCTATATTCCACCTAGGTGGACCGTGGGATATTACACCTTTGTAGAATTACTATGATAGTAAATAG
ACATTGGTGCAGGTCGTGGGCTTTCATGATCAGCAAATACTCTTCCATTGTCTCGTTTATTCAGCAGTTGGGGACGCCTAGGGTTTGTTATTGAGCTGCCXXXXXXXXXXTATTATCAAAACAAAGGCAAAAAATTTGTGTTTGGCTATATTCCACCTAGGTGGACCGTGGGATATTACACCTTTGTAGAATTACTATGATAGTAAATAG
*
>Marker515604
ATAGAAAGGTAATACATGATGGGAGAAAGAAAAACTATACTATAACATCAAATGGGAAGAAACATATTTTGATACCTTTGGAAAAAGAGCCTAAAAGTGAXXXXXXXXXXGGCAATGTCACCTAGATTGTATTGATTCCTTGGTTGGAATGTGGATTGCTTCTCAATAGTGAACAACCATAGTTGCCAAAGCTGCCATGATGATAGATGA
ATAGAAAGGTAATACATGATGGGAGAAAGAAAAACTATACTATAACATCAAATGGGAAGAAACATATTTTGATACCTTTGGAAAAAGAGCCTAAAAGTGAXXXXXXXXXXGGCAATGTCACCTAGATTGTATTGATTCCTTGGTTGGAATGTGGATTGCTTCTCAATAGTGAACAACCATAGTTGCCAAAGTTGCCATGATGATAGATGA
*
>Marker345828
TGATAATTACTATAATCACTTCCATTAACACTCCTTTCCTTAGTAGTATTCTTTACTACAAACTTCTCTCCTTATTTCTATAG-TTTTTTTCCTTATGAACXXXXXXXXXXATACATTTGTATTGCAAGTATAAATATAAATATCACATATGCTTGGGTAGAACTTCTTCTTATATTGTATTCATTACATGCATTTCTCCAGTTCGTCAAG
TGATAATTACTATAATCACTTCCATTAACACTCCTTTCCTTAGTAGTATTCTTTACTACAAACTTCTCTCCTTATTTCTATAGTTTTTTTTCCTTATGAA-XXXXXXXXXXATACATTTGTATTGCAAGTATAAATATAAATATCACATATGCTTGGGTAGAACTTCTTCTTATATTGTATTCATTACATGCATTTCTCCAGTTCGTCAAG
>Marker175002
AAGACTGCTATCATATTTCATGATGAAGTGCCCTTGCTTTTAGTCATCCTTCACTTATCATGACCTAGATTCTTGAGCACATTATTCTATTTCAGAGAGGXXXXXXXXXXCATGTCGCCTGAGTTCTTTAGTAGTTTAGAGAGGACTTTCTAGGGGATTTGCCCCCGATACCCACTTGCTATAGGTTTGTGTGGGAGATGGTTAAATCTT
AAGACTGCTATCGTATTTCATGATGAAGTGCCCTTGCTTTTAGTCATCCTTCACTTATCATGACCTAGATTCTTGAGCACATTATTCTATTTCAGAGAGGXXXXXXXXXXCATGTCGCCTGAGTTCTTTAGTAGTTTAGAGAGGACTTTCTAGGGGATTTGCCCCCGATACCCACTTGCTATAGGTTTGTGTGGGAGATGGTTAAATCTT
*
>Marker321327
TAAAATTTAGCAAAGGAAAGACATGGAACACAAAAAAAGGAGCAATAGAGGATACACTGAAAACAAGAAAAAAAATGATAAAGAGATTGAAAGGAAAAAGXXXXXXXXXXGCAATGAATTAGCAAGCATGCATGCCATTTTGTTTAGTTAGTCAACATAATTAGTTGCAAGCATTTTTTGCCATCTTCTCCACTCAATCAACATACAAGT
TAAAATTTAGCAAAGGAAAGACATGGAACACAAAAAAAGGAGCAATAGAGGATACACTGAAAACAAGAAAAAAAATGATAAAGAGATTGAAAGGAAAAAGXXXXXXXXXXGCAATGAATTAGCAAGCATGCATGCCATTTTGTTTAGTTAGTCAACATAATTAGTTGCAAGCATTTTTTCCCATCTTCTCCACTCAATCAACATACAAGT
*
>Marker471333
CCCACCATTAATGGAAACTTTGCAACACTTACCCCTACTTTGCATCTAGTTCTAAACAAGTTATTTCTTTGTATTCATCCTTCTTCTTCATGATGCTTTAXXXXXXXXXXCCCTGCAATGTGTATCACTTTCTCCCTTGTCCTTGCAATAGATGTTACCCTCTTCTCAGTCTTTGTGGTAGGTATCATGACTCCTCCTTTCATTGTGGTA
CCCACCATTAATGGAAACTTTGCAACACTTACCCCTACTTTGCATCTAGTTCTAAACAAGTTATTTCTTTGTATTCATCCTTCTTCTTCATGATGCTTTAXXXXXXXXXXCCTTGCAATGTGTATCACTTTCTCCCTTGTCCTTGCAATAGATGTTACCCTCTTCTCAGTCTTTGTGGCAGGTATCATGACTCCTCCTTTCATTGTGGTA
* *
>Marker446253
AGATTTGGGATACTATGGCTAAGATATTTTTGTATAGAAAAGTGTTATTTTCAGATATTAAGCTTTATTCAACAATATTGTAGGCAAAAGAAGATGGAAAXXXXXXXXXXAAACTATGAAGGAGGCTATGTGTATGAGTGATTTTGAGCCCTAGAGAGAAACTATGGATGAGGAGATGGTTGCATTGAGGAAAAATGCCACATGGGACTT
AGATTTGGGATACTATGGCTAAGATATTTTTGTATAGAAAAGTGTTATTTTTAGATATTAAGCTTTATTCAACAATATTGTAGGCAAAAGAAGATGGAAAXXXXXXXXXXAAACTATGAAGGAGGCTATGTGTATGAGTGATTTTGAGCCCTAGAGAGAAACTATGGATGAGGAGATGGTTGCATTGAGGAAAAATGCCACATGGGACTT
AGATTTGGGATACTATGGCTAAGATATTTTTGTATAGAAAAGTGTTATTTTCAGATATTAATCTTTATTCAACAATATTGTAGGCAAAAGAAGATGGAAAXXXXXXXXXXAAACTATGAAGGAGGCTATGTGTATGAGTGATTTTGAGCCCTAGAGAGAAACTATGGATGAGGAGATGGTTGCATTGAGGAAAAATGCCACATGGGACTT
* *
>Marker149969
TGAGTATTTTGGTCTGCATTCCTCCATTGTTGCATATTTTGTCCTGCAGTTCTGAGGCAATAAAGATACCTATTATGACTACCTAAATCCAGAGTTATAGXXXXXXXXXXGTTAGATCGATATGAGGTGAAGGTATATGATTGAAATCATCAATCTAAGTGGTTGTTTAATAGGTCTCGACCTATATGAAGTCTCTTGTATGTTTTCTTG
TGAGTATTTTGGTCTGCATTCCTCCATTGTTGCATATTTTGTCCTGCAGTTCTGAGGCAATAAAGATACCTATTATGACTACCTAAATCTAGAGTTATAGXXXXXXXXXXGTTAGATCGATATGAGGTGAAGGTATATGATTGAAATCATCAATCTAAGTGGTTGTTTAATAGGTCTCGACCTATATGAAGTCTCTTGTATGTTTTCTTG
*
>Marker396204
AAATAATATTTATGTTGCATAATTCCAAGCCATGATAGGGTATATCACTTCACCATACCACATGGTTTCACTAAAAGAGACCTTCCATCACAAAACCTTGXXXXXXXXXXGCTATAGTAGAGACTCACTATCAAGTATTGAACCTTGATCTTCCTTATAACATCATCATAGGTTGCCCATGGATCCATACCATGCAGGTCATGCCTTCCA
AAATAATATTTATGTTGCATAATTCCAAGCCATGATAGGGTATATCACTTCACCACACCACATGGTTTCACTAAAAGAGACCTTCCATCACAAAACCTTGXXXXXXXXXXGCTATAGTAGAGACGCACTATCAAGTATTGAACCTTGATCTTCCTTATAACATCATCATAGGTTTCCCATGGATCCATACCATGCAGGTCATGCCTTCTA
* * * *
>Marker228835
TAAATACTTACATCGACCATCCACTAAGAAAACATCACCATTGCTTCCTACACCCCCTCCACATCAAAAGCTTCAATGTTTATCATGGTGTGTGCAACTGXXXXXXXXXXACACTTGAGTCCCTCATTTCTATTGGGATAAGGTGCCATTAACCTTGTAAATCCCATTATTGTATTATTCCATTTATTATTTGTAATTACCCATAAGGGA
TAAATACTTACATCGACCATCCACTAAGAAAACATCACCATTGCTTCCTACACCCCCTCCACATCAAAAGCTTCAATGTTTATCATGGTGTGTGCAACTGXXXXXXXXXXACACTTGAGTCCCTCATTTCTGTTGGGATAAGGTGCCATTAACCTTGTAAATCCCATTATTGTATTATTCCATTTATTATTTGTAATTACCCATAAGGGA
*
>Marker455027
ATTCCTTGATAAAGAACCACACTTGGGATTAAGTCCCCCTTCTGAAGGGGAGAAAACTTATTTGATGTAAGTGGACGTATCAAACTAAATTTGTAGTAGAXXXXXXXXXXTCTCTCCATTGGATTTAATCAAGTGGGAGAATGCTAGGATAGTGTGATATTTAATTGCAATCTTAATGTATAATGTTGTATCTCTAACATCCTAGCAATG
ATTCCTTGATAAAGAACCACACTTGGGATTAAGTCCCCCTTCTGAAGGGGAGAAAACTTATTTGATGTAAGTGGACGTATCAAACTAAATTTGTAGTAGAXXXXXXXXXXTCTCTCCATTGGATTTAATCAAGTGGGAGAATGCTAGGATAGTGTGATATTTAATTGCAATCTTAATGTATAATGTTGTATCTCTAACTTCCTAGCAATG
*
>Marker483906
TAAGGGACTATGGCCCAATTTGAAACTTCATCTTTTAATTCTTCATCCTTTAGCTCTTCTTTGACATTTTAGAAGAGGAAGCTGGCACAAAGTTGATCTTXXXXXXXXXXGAATTGATCTTCTTGTGGTTGATTTAGTTCAATATGTTGTGGCCAAAAGTAATCCAAGTTGAAGTTTCCTCAATTAGCTAAAGGAGTCCATCTACTATGA
TAAGGGACTATGGCCCAATTTGAAACTTCATCTTTTAATTCTTCATCCTTTAGCTCTTCTTTGACATTTTAGAAGAGGAAGCTGGCACAAAGTTGATCTTXXXXXXXXXXGAATTGATCTTCTCGTGGTTGATTTAGTTCAATATGTTGTGGCCAAAAGTAATCCAAGTTGAAGTTTCCTCAATTAGCTAAAGGAGTCCATCTACTATGA
*
>Marker669060
ATTCCATTATTTCCTAAGCAACATCTCTTTTATTTTCATATTTTTTGGGGCAATATATCATTGATGTTGGGGATATATAACTTGCTATGTGTGTTTTTTGXXXXXXXXXXAATCTAGTTAAGAATCACATTGTTGTTACTCTATAGTTTATTGGTTGTTTTCTATACTTTGTAATGTGTATTTTCATTTTCTTTGTGTGCAAGTGCTACA
ATACCATTATTTCCTAAGCAACATCTCTTTTATTTTCATATTTTTTGGGGCAATATATCATTGATGTTGGGGATATATAACTTGCTATGTGTGTTTTTTGXXXXXXXXXXAATCTAGTTAAGAATCACATTGTTGTTACTCTATAGTTTATTGGTTGTTTTCTATACTTTGTAATGTGTATTTTCATTTTCTTTGTGTGCAAGTGCTACA
*
>Marker335401
ATGTATCATTTATAGATGATTATTCTAGGAGGACATGGATGTATTTCCTTAGAACTAAATTTGAAGTATTCAATTGTTTAAAGGAGTTTAAATCCCTTGTXXXXXXXXXXGTCTCCTACATCAACTCTTGTTGAAAATACATTTATGGAGGTGTGGTTAGGAAAAAAAGCCCCCATTACAACATCTTCAAGTTTTCAGTTGTGAGGCATA
ATGTATCATTTATAGATGATTATTCTAGGAGGACATGGATGTATTTCCTTAGAACTAAATTTGAAGTATTCAATTGTTTAAAGGAGTTTAAATCCCTTGTXXXXXXXXXXGTCTCCTACATCAACTGTTGTTGAAAATACATTTATGGAGGTGTGGTTAGGAAAAAAAGCCCCCATTACAACATCTTCAAGTTTTCAGTTGTGAGGCATA
*
>Marker383150
TGGAAGCCCATGTAGTTAAGGGGTTATTATTTTTTTATTATTATTCTGGTTGACTTGGAATATTGGTTGTAATGGAATTCAAGGAGAAAGGTGGAGTATTXXXXXXXXXXGTTTTTGGTGGTCTTAGTTTTAGGAATCCACTTGTAATTGCCTCTCAACTCTTCTTTATAAATTGTATATATTGGATAGAGATTTCATGGTTATTTTACA
TGGAAGCCCATGTAGTTAAGGGGTTATTATTTTTTTATTATTATTCTGGTTGACTTGGAATATTGGTTGTAATGGAATTCAAGGAGAAAGGTGGAGTATTXXXXXXXXXXGTTTTTGGTGGTCTTAGTTTTAGGAATCCACTTGTAATTTCCTCTCAACTCTTCTTTATAAATTGTATATATTGGATAGAGATTTCATGGTTATTTTACA
*
>Marker586664
TGAAGCTCAAATCAAGAAAATGGACAAAGAACTAGCTGATTTTCAAGAATTTGTGGGAAATGAATATCTAGCTCAAGAAATGACACCTCTTGTTGAAGGTXXXXXXXXXXTGATTACATATGAGGATGTTCAAAAGTATTCATTATGAATCTACAACCAAATATATGTGATAAGATATTGTTGATGAAGTATAGTTCTTTTCAACATCTA
TGAAGCTCAAATCAAGAAAATGGACAAAGAACTAGCTAATTTTCAAGAATTTGTGGGAAATGAATATCTAGCTCAAGAAATGATACCTCTTGTTGAAGGTXXXXXXXXXXTGATTACATATGAGGATGTTCAAAAGTATTCATTATGAATCTACGACCAAATATATGTGATAAGATATTGTTGATGAAGTATAGTTCTTTTCAACATCTA
* * *
>Marker456843
ATTGAAATGACAAACAATAATGCCTCATCCTTCTCATCCTTCCTAGATAGGATATCGTCCACTATATTCGCCTTTCCTTTCCTATAGATGATCTCAAAGTXXXXXXXXXXGCCATCCTTCTTGCATGAGAACTACTCCTATACCATTTCCTGAAGCATCACACTCCACAATAAAATCCTTGGTGAAGTTTGGACTAGCAAGAATTGGAGT
ATTGAAATGACAAACAATAATGCCTCATCCTTCTCATCCTTCCTAGATAGGATATCATCCACTATATTCGCCTTTCCTTTCCTATAGATGATCTCAAAGTXXXXXXXXXXGCCATCCTTCTTGCATGAGAACTACTCCTATACCATTTCTTGAAGCATCACACTCCACAATAAAATCCTTGGTGAAGTTTGGACTAGCAAGAATTGGAGT
* *
>Marker468224
TGTCTCCCATATCAAAAAAATATCCCCATCTCTAAGATCCATATGGGGACATCTCCAAACATTATGATACTTTAGATGAAGGTTCTTTGCATCTCTATATXXXXXXXXXXATCCCATACAGATAATAGTAAGAAAAAAAACAATAATAAAACTTAAGATACATGCATGCACTAAAGTTTAATCAATTGATTAAAAATATAGTCATCTTTG
TGTCTCCCATATCAAAAAAATATCCCCATCTCTAAGATCCATATGGGGACATTTCCAAACATTATGATACTTTAGATGAAGGTTCTTTGCATCTCTATATXXXXXXXXXXATCCCATACAGATAATAGTAAGAAAAAAAACAATAATAAAACTTAAGATACATGCATGCACTAAAGTTTAATCAATTGATTAAAAATATAGTCATCTTTG
*
>Marker588277
ACTTGTGTGCTTGCCTCACTTCTATTGATATCATTTTGAGATTAAGGGCACTCAAAGACCATATGACTTGCTAGTCCACATTAGAAACAAGTTCAACTAAXXXXXXXXXXCCTTGGATTTGAAATCTTAGTCCATTTAGGTATCTAGTAGTTGATTTCTCCTCTTCTCCCTACACATTTGTTCTAATTTGTAAGCATACAAATATTTAAG
ACTTGTGTGCTTGCCTCACTTCTATTGATATCATTTTGAGATTAAGGGCACTCAAAGACCATATGACTTGCTAGTCCACATTAGAAACAAGTTCAACTAAXXXXXXXXXXCCTTGGAGTTGAAATCTTAGTCCATTTAGGTATCTAGTAGTTGATTTCTCCTCTTCTCCCTACACATTTGTTCTAATTTGTAAGCATACAAATATTTAAG
*
>Marker442036
TCTTTCTTTCTTATCCAATTATCCTATTCTTTATAAGACATGCTTATGGGTTTAGTCAAAGAAGATACCTTAGCCCAGTGATCTCTTTCTACTAGAAGATXXXXXXXXXXACGACCCACACAACAAACTATTCTTTAATTCCAATCAATAGTAGTTGTAAAATTATGTAGCGTCATAAATTGTGCATGCTCACAATTTCACACTATGTTT
TCTTTCTTTCTTATCCAATTATCCTATTCTTTATAAGACATGCTTATGGGTTTAGTCAAAGAAGATACCTTAGCCCAGTGATCTCTTTCTACTAGAAGATXXXXXXXXXXACGACCCACACAACAAACTATTCTTTAATTCCAATCAATAGTAGTTGTAAAATCATGTAGCGTCATAAATTGTGCATGCTCACAATTTCACACTATGTTT
*

## Sheet: LG3
>Marker41937
TTCTTCAGCATAATTATTACTTTGACAGCATAACCTGCCAGCATAGACAGCAACCATCCACCCTTTGTCATCCCTTATAATCCCTCCACCACTAGCTTTGXXXXXXXXXXGTCTAGCAGTATCCCTAAAATTTTTAGGGGAAAACCCTGTTAGGGGAAAAACCATGGGGTGATTAACCCAAGATTGTATTCTCTATTAGAAGAATAAGAT
TTCTTCAGCATAATTATTACTTTGACAGCATAACCTACCAGCATAGACAGCAACCATCCACCCTTTGTCATCCCTTATAATCCCTCCACCACTAGCTTTGXXXXXXXXXXGTCTAGCAGTATCCCTAAAATTTTTAGGGGAAAACCCTGTTAGGGGAAAAACCATGGGGTGATTAACCCAAGATTGTATTCTCTATTAGAAGAATAAGAT
*
>Marker47136
AATAATTGAATGAAATGTGCCCTTTAGATTTAAAAAGCAACCAATCATGTGATGCCACATCAGCGCACCAACAAAGGAGGTCTTAATGCACACCTATTGGXXXXXXXXXXACTGGTTTGGCAGAGGCATTTGGCAGGTGTCTCGAGGTGAGCAACACACAGGGCCCAGGCCCCACATATATACAAGTTACAACAATCACGGGCCAGAACA
AATAATTGAAAGAAATGTGCCCTTTAGATTTAAAAAGCAACCAATCATGTGATGCCACATCAGCGCACCAACAAAGGAGGTCTTAATGCACACCTATTGGXXXXXXXXXXACTGGTTTGGCAGAGGCATTTGGCAGGTGTCTCGAGGTGAGCAACACACAGGGCCCAGGCCCCACATATATACAAGTTACAACAATCACGGGCCAGAACA
*
>Marker154411
AGTAACTTGTATAACTTTATAAAATGTTGCTTCCACTCATTATAAAGCAAGCCTTATTGCAAATTTCTCTCATCTCTCTTCTTTGCCAGCTTTACTAACAXXXXXXXXXXAAAATGGATAAGATGTGTTGGTGCCAAGATAAGCTCAAAGGCTACTTTTCCCTAATGAAGGCCTTCAAAGAGTGTGTGCATGTTGATGCCCGTCAACATC
AGTAACTTGTATAACTTTATAAAATGTTGCTTCCACTCATTATAAAGCAAGCCTTATTACAAATTTCTCTCATCTCTCTTCTTTGCCAGCTTTACTAACAXXXXXXXXXXAAAATGGATAAGATGTGTTGGTGCCAAGATAAGCTCAAAGGCTACTTTTCCCTAATGAAGGCCTTCAAAGAGTGTGTGCATGTTGATGCCCGTCAACATC
*
>Marker217593
TTCATCATTAACATATTTATCATCAAGCGGCTAAGTATCATTTTTGGTAGGAGAAACAACCAGAGTAAGATGATGAAACTTGCCATTGTTTGACCAACCAXXXXXXXXXXAAGTGGTCAAGAAGCACCTATAGGTGAGCTACTTCAAGTGCAACTTTATTTGCTTGCACTTGTATTTGCACGAGAACATTGGAGCAAATCACAAATTTAC
TTCATCACTAACATATTTATCATCAAGCGGCTAAGTATCATTTTTGGTAGGAGAAACAACCAGAGTAAGATGATGAAACTTGCCATTGTTTGACCAACCAXXXXXXXXXXAAGTGGTCAAGAAGCACCTATAGGTGAGCTACTTCAAGTGCAACTTTATTTGCTTGCACTTGTATTTGCACGAGAACATTGGAGCAAATCACAAATTTAT
* *
>Marker222217
CTCTTATCACTCACAACTGCCCGTAAAATAGGATATCCCAGCTTCCTCCTCCCAAATTGCTCCCCC---TGCTGCTGCTGCTGGGAGACAAACAAAACACTCTXXXXXXXXXXGGCCTCTGTGCATTTATCCTAATCTGCCTAAGCCTGTTGTCCAAGTTGGTAGCTATATAGTGCGGATATGCAGGGGTAGAAGCAGGAACTGAAAATGAAA
CTCTTATCACTCACAACTGCCCGTAAAATAGGATATCCCAGCTTCCTCCTCCCAAATTGCTCCCCCTGCTGCTGCTGCTGCTGGGAGACAAACAAAACA--C-XXXXXXXXXXGGCCTCTGTGCATTTATCCTAATCTGCCTAAGCCTGTTGTCCAAGTTGGTAGCTATATAGTGCGGATATGCAGGGGTAGAAGCAGGAACTGAAAATGAAA
>Marker291301
ATAAATTTATCTAAATAATATGCTTATAGGTAGATATTTGCATAATGGTTATCATTATTTGTATGCATTTGCATGATCTTTTCAATTATGCATGCTATTTXXXXXXXXXX-TGTTCCACATCTAGGTATGGTTGATTCTAACTTTGATGGAAAAAGGAATGAAAGCAACATGCACAACATGAATTGCAGTCCAAGGGATACAGTAAATTAA
ATAAATTTATCTAAATAATATGCTTATAGGCAGATATTTGCATAATGGTTATCATTATTTGTATACATTTGCATGATCTTTTCAATTATGCATGCTATTTXXXXXXXXXXATGTTCCACATCTAGGTATGGTTGATTCTAACTTTGAT-GTAAAAGGAATGAAAGCAACATGCACAACATGAATTGCAGTCCAAGGGATACAGTAAATCAA
* * * *
>Marker221091
ATGATTGATGGTGGATCTTGTTGATGTGTGTTTTAGCACGCAGCAACGCAGGTGTGATTGTTGGTTTCACACCTCTCTTGAAAAGTATCTTACCCTAGGTXXXXXXXXXXATCCTAAGTGACTTTCACAATGCATAGATTTTACTTTCAGTAGACAAATGCTTTGAAACTGAACCAGTTTTTTGAGTTACCAAACTAAGATGGGTGTTAC
ATGATTGATGGTGGATCTTGTTGATGTGTGTTTTAGCACGCAGCAACGCAGGTGTGATTGTTGGTTTCACACCTCTCTTGAAAAGTATCTTACCCTAGGTXXXXXXXXXXATCCTAAGTGACTTTCACAATGCATAGATTTTACTTTCAGTAGACAAATGCTTTGAAACTTAACCAGTTTTTTGAGTTACCAAACTAAGATGGGTGTTAC
*
>Marker148495
AGCTTTGAAAGTAGTCTATGTTTTAGGCATGGTATCACCAAACTCTCTCATCTCAAATGTTGTAAGTTTTCCAAGAAAATGATCTTTTGAAACATCTTTCXXXXXXXXXXCTTCATATGAATCCTTCAACTTTTCCTAGATTTCATGAGTTGTTTCTAGATCCATGACTTTTACTAACTCAGTGTTAGACAATGCACTTAACAGAGCATC
AGCTTTGAAAGTAGTCTATGTTTTAGGCATGGTATCACCAAACTCTCTCATCTCAAATGTTGTAAGTTTTCCAAGAAAATGATCTTTTGAAACATCTTTCXXXXXXXXXXCTTCATATGAATCCTTCAACTTTTCCTAAATTTCATGAGTTGTTTCTAGATCCATGACTTTTACTAACTCAGTGTTAGACAATGCACTTAACAGAGCATC
*
>Marker133571
ATTAATAATGGTAGTTGTAATAGTAACTTTAATTACTTTATAAAATGTTGCTTTCACTCATTCCTAATTACTCTCTTCTCTCTTCTTTGTCAATTTTACTXXXXXXXXXXGGTGTCTATAGAGGTTGCAGATGGCTCTGAGGTGTTCCCAACACCTTAAGAGTCAAACACAGATGAAGTATAGATTCTTGAGAAACAAAGTAAAAAACAA
ATTAATAATGGTAGTTGTAATAGTAACTTTAATTACTTTATAAAATGTTGCTTTCACTCATTCCTAATTACTCTCTTCTCTCTTCTTTGTCAATTTTACTXXXXXXXXXXGGTGTCTATAGAGGTTGCAGATGGCTCTGAGGTGTTCCCAACACCGTAAGAGTCAAACACAGATGAAGTATAGATTCTTGAGAAACAAAGTAAAAAACAA
*
>Marker205520
TTAATATCGTTTGTTAGTATTGAATATTTAACAAAGTCAAGTGAATATGTTATAAACTCTAAAAAGAAATACAATTATTAAGTAGTATGTAATATATTTGXXXXXXXXXXAAGCAAGATCAAGAAACTATAGGACCAGATCGCACTATAAATGTCATTGCTTATGTCAAACATATCATCTGCAAGCTTGAAATAAAATATATTAATTATG
TTAATATCGTTTGCTAGTATTGAATATTTAACAAAGTCAAGTGAATATGTTATAAACTCTAAAAAGAAATGCAATTATTAAGTAGTATGTAATATATTTGXXXXXXXXXXAAGCAAGATCAAGAAACTATAGGACCAGATCGCACTATAAATGTCATTGCTTATGTCAAACATATCATCTGCAAGCTTGAAATAAAATATATTAATTATG
* *
>Marker17853
ACCAGTTTATCTTTTATTTGATTTCATCAATATTATAATTGTTCTCATTAACATTTTCACATGATGCCTTATAATAA-----GACATCTTGGCCTTAAATCAGAAXXXXXXXXXXCAGCCATAACATATTTATGTGTTTCCTTATTAGTATGTGTCCTTAGCATTATTATTTACAAAACACACCATTTATCAGATTGATCATTAAGAAGAGAATG
ACCAGTTTATCTTTTATTTGATTTCATCAATATTATAATTGTTCTCATTAACATTTTCACATGATGCCTTATAATAATATAAGACATCTTGGCCTTAAAT-----XXXXXXXXXXCAGCCATAACATATTTATGTGTTTCCTTATTAGTATGTGTCCTTAGCATTATTATTTACAAAACACACCATTTATCAGATTGATCATTAAGAAGAGAATG
>Marker149067
ACTTTTTCTAAGGGCTCTGGGATGAAATCTTCTACAGGATGCAACCTACTCCAATATTTTTGGCACAACAAACCTAGAGGTAAAAAGAGTGGCCATCCTTXXXXXXXXXXTGGAAGTGTTTTCCCTAATTTTTAGAATTTGTCACATTTTACATAAAAATTTGAAGCACTTAAAGATTTTATCTTAGAAGAAGTTTGTAATATGAAATGT
ACTTTTTCTAAGGGCTCTAGGATGAAATCTTCTACAGGATGCAACCTACTCCAATATTTTTGGCACAACAAACCTAGAGGTAAAAAGAGTGGCCATCCTTXXXXXXXXXXTGGAAGTGTTTTCCCTAATTTTTAGAATTTGTCACATTTTACATAAAAATTTGAAGCACTTAAAGATTTTATCTTAGAAGAAGTTTGTAATATGAAATGT
*
>Marker130881
ATTTTTTTGTCTTCTTGTTGTGGAAAGAATTCCTCCTATGATAGTAGATGCCAGAATAATTGCTTTTCTTTGGTCATCCTTCAGGTAACATAATTGGCCTXXXXXXXXXXATTGGTTATTCACCTGCATTGTGTTTGCTTGAAAAATTCCAAGAAATCCATTTTGTGTTTTCTCTGCAATCTTGCATTTTATGAGATGATCTAACTTGAG
ATTTTTTTGTCTTCTTGTTGTTTAAAGAATACCTCCTATGATAGTAGATGCCAGAATAATTGCTTTTCTTTGGTCATCCTTCAGGTAACATAATTGGCCTXXXXXXXXXXATTGGTTATTCACCTGCATTGTGTTTGCTTGAAAAATTCCAAGAAATCCATTTTGTGTTTTCTCTGCAATCTTGCATTTTATGAGATGATCTAACTTGAG
** *
>Marker201029
TTAATTCAGAGGGGAACTATTTTTGATAGTTCACCCATTTGTTTCTTAACTCATTTGTTCTTGAAAGAAAAATGGAATAGAGTCAGAATAAAACATTTTTXXXXXXXXXXCAGCAACACTAAGGCAGAGGAAGAATGAAGTGCAATAGATCAGTATATTGAGCTTATCCGGAACTGAACCTAAGCATAT-TGGATGCTTCTCATCAATTCA
TTAATTCAGAGGGGAACTATTTTTGATAGTTCACCCATTTGTTTCTTAACTCATTTGTTCTTGAAAGAAAAATGGAATAGAGTCAGAATAAAACATTTTTXXXXXXXXXX-AGCAGCACTAAGGCAGAGGAAGAATGAAGTGCAGTAGATCAGTATATTGAGCTTATCCAGAACTGAACCTAAGCATATGTGGATGCTTCTCATCAATTCA
* * *
>Marker122080
TTGATCTTCATTCCTCTATAAATGTGGAGCAATCTACTTCAACGATTTGCACTATTTCTCATGTTTTTGACAAAGAGATATGTTGACATCAATGACAACAXXXXXXXXXXCAACATCCCCCATCCAAATCCAAAATCATGCCTCATCCAAAACCCTAACTCCCAAATTTGCCACATTGTGGTAGCAACACTTTATCATAAGGGCTATGAT
TTGATCTTCATTCCTCTATAAATGTGGAGCAATCTACTTCAATGATTTGCACTATTTCTCATGTTTTTGACAAAGAGATATGTTGACATCAATGACAACAXXXXXXXXXXCAACATCCCCCATCCAAATCTAAAATCATGCCTCATCCAAAACCCTAACTCCCAAATTTGCCACATTGTGGTAGCAACACTTTATCATAAGGGCTATGAT
* *
>Marker164507
TCTTGTTTGCTGC----GTGTGGTCTGGAAACTCATTTTGCCATTTCTCTTGGCTTTGTAGCACTTGCGTGAGCGCCTGGACCAAGATGGGTTTTTCATGAAATXXXXXXXXXXAATATAGAATAATCCGTTATATATTTCTCATAGATGACTAAAATGATCCACCTTGAGTTAAATAAAATGATCCATAGAAAAGTCTAAATAATAAAAACAA
TCTTGTTTGCTGCATGTGTGTGGTCTGGAAACTCATTTTGCCATTTCTCTTGGCTTTGTAGCACTTGCGTGAGCGCCTGGACCAAGATGGGTTTTTCATG----XXXXXXXXXXAATATAGAATAATCCGTTATATATTTCTCATAGATGACTAAAATGATCCACCTTGAGTTAAATAAAATGATCCATAGAAAAGTCTAAATAATAAAAACAA
>Marker41505
ATGTTAGACCTGCACTAATAATGAAGGAACAAGGTTATATTTCTAGTTACTAGAAAAAATGGTTTTTCTTTTGTTTTGAGTATTTAGCAATCTAGATATGXXXXXXXXXXAAATGGGAGAGGAAGGCTCACAATTACCATTGCCATTTTCTATAGTTCTTTTGTTTAGATTAATTGTATTATCTTTTGTCTATGTTAGGTTAAGCATTTA
ATGTCAGACCTGCACTAATAATGAAGGAACAAGGTTATATTTCTAGTTACTAGAAAAAATGGTTTTTCTTTTGTTTTGAGTATTTGGCAATCTAGATATGXXXXXXXXXXAAATGGGAGAGGAAGGCTCACAATTACCATTACCATTTTCTATAGTTCTTTTGTTTCGATTAATTGTATTATCTTTTGTCTATGTTAGGTTAAGCATTTA
* * * *
>Marker303795
AGAAATCTCATAACCAATTCAATATTATGCACGTTGAATTAAGATTGCACGTCTAATACCACGAATGTAAACAACCGAAATGAAAATGGTTTACTATCTCXXXXXXXXXXCTAATTATTTATCATAGTTCAAATTCACTGAAATTAGAAGTAGTCACTGCTGTAAGAACAACCTATAGAAATACCTCCTGCAGTAGCAACACGAAATCAT
AGAAATCTCATAACCAATTCAATATTATGCACGTTCAATTAAGATTGCACGTCTAATACCACGAATGTAAACAACCGAAATGAAAATGGTTTACTATCTCXXXXXXXXXXCTAATTATTTATCATAGTTCAAATTCACTGAAATTAGAAGTAGTCACTGCTGTAAGAACAACCTATAGAAATACCTCCTGCAGTAGCAACACGAAATCAT
*
>Marker112189
GTCCTTTGAGAACACTTTAGGCATCCAGAACTAACTGTATTACTTCTATCATTTGACAACTGACCTTGTGGACCATTAGAACACATGATATTACAAGATAXXXXXXXXXXCTTTATCTACGGAGGAATGCAGATCAACACATTGTGACTCTGCCTTAGACTATACATTGTAAATACCTTAATCAAATTTCTGTAACTTCTCTCTAAGTGT
GTCCTTTGAGAACACTTTAGGCATCCAGAACTAACTGTATTACTTCTATTATTTGACAACTGACCTTGTGGACCATTAGAACACATGATATTACAAGATAXXXXXXXXXXCTTTATCTACGGAGGAATGCAGATCAACACATTGTGACTCTGCCTTAGACTATACATTGTAAATACCTTAATCAAATTTCTGTAACTTCTCTCTAAGTGT
*
>Marker396563
TCACTAAGTGGGTCAAAGCCATTCCACTCACTTTTACCACAGGAATCCAAATTGCTAAATTTTCTTTCCATTACATAATATGCCATTATGGCATTCCCCAXXXXXXXXXXACACCATACTCATTAGTATTCAGTTCCAAAGCCATTTTGCCTATTGAGGTTGAGCTCCCATCACTTAGGATTTCATTGTAGAATATAATCATTGAAGAAG
TCACTAAGTGGGTCAAAGCCATTCCACTCACTTTTACCACAGGAATCCAAATTGCTAAATTTTCTTTCCATTACATAATATGCCATTATGGCATTCCCCAXXXXXXXXXXACACCATACTCATTAGTATTCAGTTCCAAAGCCATTTTGCCTATTGAGGTTGAGCTCCCAGCACTTAGGATTTCATTGTAGAATATAATCATTGAAGAAG
*
>Marker416660
AATACTTTCCAAGAGCCATGGTTTCATGTTTTCCATCTAATTCAGGGGCAATAGAGCCTAAGGAGAAACGTAAGGTGACTAGTGATGCTCCAAACTTAGTXXXXXXXXXXTTTGGTCACTACTAGATGTAGGTTACGTAGGTCTCTATCATTGCTCAAGTTTTCACAATCATCAAATATGTGGATGCTAATGCACCTAGCCTTGGAGAGG
AATACTTTCCAAGAGCCATGGTTTCATGTTTTCCATCTAATTCAGGGGCAATAGAGCCTAAGGAGAAACGTAAGGTGACTAGTGATGCTCCAAACTTAGTXXXXXXXXXXTTTGGTCACTACTAGATGTAGGTTACGTAGGTCTCTATCATTGCTCAAGTTTTCACAATCATCAAATATGTGGATGCTAATGCACCTTGCCTTGGAGAGG
*
>Marker201807
AAGATGGGTGATCTCCTGGGAAGTCCCAATGCTTCACCCCTGTATGCATCACCTAGATGCAATGAGTGCTAAGTGGACCATTCATTAACATGAGAGATGGXXXXXXXXXXATACATGAAGCATAAGTGATACACAAAGTATACACGTAAGACACAAAGCATGAAGCATACGAAGTATACACATAAATACGTGTGAGGCATGAAGCATATA
AAGATGGGTGACCTCCTGGGAAGTCCCAATGCTTCACCCCTGTGTGCATCACCTAGATGCAATGAGTGCTAAGTGGACCATTCATTAACATGAGAGATGGXXXXXXXXXXATACATGAAGCATAAGTGATACACAAAGTATACATGTAAGACACAAAGCATGAAACATACGAAGTATACACATAAATACGTGTGAGGCATGAAGCATATA
* * * *
>Marker318135
CCTTCCAACAATAGTTGTGCCAACTTTACAAGCCATCTTTGGGCCCACCATATCCTATAGTCATAGGTCACACTTGTATCCTACACATCTACCCCAGTATXXXXXXXXXXACTAGCCTCAGCATTGTAATATGCTCCCATGTCCACACCTATAGATGTGTCACATGTGCCAAGATCCATCCATCTCTATACACAATCAAATATAGATCCC
CCTTCCAACAATAGTTGTGCCAACTTTACAAGCCATCTTTGGGCCCACCATATCCTATAGTCATAGGTCACACTTGTATCCTACACATCTACCCCAGTATXXXXXXXXXXACTAGCCTCAGCATTGTAATATGCTCCCATGTCCACACCTATAGATGTGTCACATGTGCCAAGATCCATCCATCTCTATACACAATCAAATACAGATCCC
*
>Marker130609
ATCAACATACCATCAATGTATCAAGTTCCCTCACAATGACCAAGAAATTACTATTCAAGGCCATCCTAATCCATTCCAATATTCCAATTCCATCCAATCCXXXXXXXXXXCATATCATTGTCTCCATCCCTCATCTTAGTTATTGCATTGTAGTTGCATTACACAATCCTCCTCATAGCCATTATAGCTTTGTCATCTCAAAAGCAAGGA
ATCAACATACCATCAATGTATCAAGTTCCCTCACAATGACCAAGAAATTACTATTCAAGGCCATCCTAATCCATTCCAATATTCCAATTCCATCCAATCCXXXXXXXXXXCATATCATTGTCTCCATCCCTCATCTTAGTTATTGCATTGTAGTTGCATTACACAATCCTCCTCATAGCCATTCTAGCTTTGTCATCTCAAAAGCAAGGA
*
>Marker118998
CATTCTAACCAAAAACTGAAGGACACGCTATCAACAAAATTGGGTCTGAAGAGGCACCCACAGGAAATCAGCTATAGACAAAAAAAACAGGACTAGATATXXXXXXXXXXCATTCTCAGGAGGATCTGTGCTAGAAGAGCCAACGCCAGGCATAACAGGAAGATTCCTCAGCTGACCCTTTTACTCAAGCACATCTTTATATAGAAGCAT
CATTCTAACCAAAAACTGAAAGACACGCTATCAACAAAATTGGGTCTGAAGAGGCACCCACAGGAAATCAGCTATAGACAAAAAAAACAGGACTAGATATXXXXXXXXXXCATTCTCAGGAGGATCTGTGCTAGAAGAGCCAACGCCAGGCATAACAGGAAGATTCCTCAGCTGACCCTTTTACTCAAGCACATCTTTATATAGAAGCAT
*
>Marker106625
TTCATATAGTTTGTATTAGCTATATAGGGGTTTTGTGACAGGTAGTTGTTCTTGATTCAGTGATAGTTTTAGGATCAAGATAACAAGTTGGGTTTGGTTTXXXXXXXXXXGGTGGGGACTATGCTATCAAAGAACATGAATAAATTTGCTACTTTCTATTATTGGTGAATCAAAGACCACATTTCAAGGTGCAACAACTAGTGAAATAAA
TTCATATAGTTTGTATTAGCTATATAGGGGTTTTGTGACAGGTAGTTGTTCTTGATTCAGTGATAGTTTTAGGATCAAGATAACAAGTTGGGTTTGGTTTXXXXXXXXXXGGTGGGGACTATGCTATCAAAGAACATGAATAAATTTGCTACTTTCTATTATTGGTGAATCAAAGACTGCATTTCAAGGTGCAACAACTAGTGAAATAAA
**
>Marker177917
ATGACAATAATTTAATGTTTCTAGTGTTGCTTTTAAACCTCCTATGGTTGTTACCTATGCCTCATGGTATAACAACCTCTACAATGTTAATTATGATATTXXXXXXXXXXTCACATGCTTGTTACATCAATGTCAAGGGCTCAGAATTTCATCACCTAGGAAAGCATGTTACCAAGATTTGATGGATTGCCCATTAGGCAATCAAATCTT
ATGACAATAATTCAATGTTTCTAGTGTTGCTTTTAAACCTCCTATGGTTGTTACCTATGCCTCATGGTATAACAACCTCTACAATGTTAATTATGATATTXXXXXXXXXXTCACATGCTTGTTACATCAATGTCAAGGGCTCAGAATTTCATCACCTAGGAAAGCATGTTACCAAGATTTGATGGATTGCCCATTAGGCAATCAAATCTT
*
>Marker142522
CATCTCATCTTTTTTTATTTCTTTCCCCTTAGGCATAGGGATCTCCTCTTCTTGATATTCTTCCTTAACAAATATTTCCACAACCTCTTTATTCTTCTTCXXXXXXXXXXTATGTTGAACAATTCAATGTAGAATGCTGACAGTCTATAGTATCTTCTTCTCCTTACCTCATTCTCATTAGGACAATTGGCTCAAAAGACTTCCAAATGT
CATCTCATCTTTTTCTATTTCTTTCCCCTTAGGCATAGGGATCTCCTCTTCTTGATATTCTTCCTTAACAAATATTTCCACAACCTCTTTATTCTTCTTCXXXXXXXXXXTATGTTGAACAATTCAATGTAGAATGCTGACAGTCTATAGTATCTTCTTCTCCTTACCTCATTCTCATTAGGACAATTGGCTCAAAAGACTTCCAAATGT
*
>Marker377575
TTTCTTTTTTATTTTCTCTGATAGATGTCACCCTTGTAGCTTTAAGTTTAGATTTATCTCTACCCAAAAGTGTGGACATCAACAATCTTCTCTTTTTCACXXXXXXXXXXAAAGACAAGGGACTAAGCACCACTAAAAGTTTCCACTATCCCGTTGGAATTCCTTTCTACTGAGGAGGAATGGGGAAGGTCTCCTTGCAAGGTTTAATTA
TTTCTTTTTTAGTTTCTCTGATAGATGTCACCCTTGTAGCTTTAAGTTTAGATTTATCTCTACCCAAAAGTGTGGACATCAACAATCTTCTCTTTTTCACXXXXXXXXXXAAAGATAAGGGACTAAGCACCACCAAAAGTTTCCACTATCCCGTTGGAATTGCTTTCTACTGAGGAGGAATGGGGAAGGTCTCCTTGCAAGGTTTTATTA
* * * * *
>Marker47337
AATAGTAAGGATTGATTCATCACCACTTATGTGGGTGGAATACAATCCAACACTAAGCATCCATAAACATAGATACAACTATACATATTTTGAACAAAACXXXXXXXXXXAGAATACTTCAAATCAGTCTAGCCCCAATGGTGGTATAGCACCACCCAACCATATGGAACCCTCAAGCCCACCCCACTATCTTAGGAGTTAGTCAAATTG
AATAGTAAGGATTGATTCATCACCACTTATGTGGGTGGAATACAATCCAACACTAAGCATCCATAAACATAGATACAACTATACATATTTTGAACAAAACXXXXXXXXXXAGAATACTTCAAATCAGTCTAGCCCCAATGGTGGTATAGCACCACCCAACCATATGGAACCCTCAAGCCCACCCCACTGTCTTAGGAGTTAGTCAAATTG
*
>Marker143841
ATCTTTATCATATGCCATCTCTACTAGATTAAAGTCTCCGCACAAAACCCAAGTGGTAGTAGGCATTAAATCAACATCTAGTTCTATCTCCGGGAAGATCXXXXXXXXXXATTAAACAATATTTTAACTCTCTTACAGTGCACGCTCTACTTCTGCATGTGTTTCTAGGGTTTTGTTTAGATTTGGTTGTTTTGACACATGGGGATGGAG
ATCTTTATCATATGCCATCTCTACTAGATTAAAGTCTCCGCACAAAACCCAAGTGGTAGTAGGCATTAAATCAACATCTAGTTCTATCTCCGGGAAGATCXXXXXXXXXXATTAAACAATATTTTAACTCTCTTACAGTGCACACTCTACTTCTGCATGTGTTTCTAGGGTTTTGTTTAGATTTGGTTGTTTTGACACATGGGGATGGAG
*
>Marker311336
TCTATGTGGATCTCCATGTTTGCACCTGTATCATCATCACCAATGTGCACATCCTCCATGGTCTTGTCCTTTTCTTATTCTTCTTCATCATATGACAAATXXXXXXXXXXTCTTGCTTCCTGAGCTTTCTTAGTCTTGAAATTTACAATTGTGGGGATGGGGACATTATGTTGGCACTATGTTTGTATTGTCTTCACATTCTTCCTCTTT
TCTATGTGGATCTCCATGTTTGCACCTGTATCATCATCACCAATGTGCACATCCTCCATGGCCTTGTCCTTTTCTTATTCTTCTTCATCATATGACAAATXXXXXXXXXXTCTTACTTCCTGAGCTTTCTTAGTCTTGAAATTTACAATTGTGGGGATGGGGACATTATGTTGGCACTATGTTTGTATTGTCTTCACATTCTTCCTCTTT
* *
>Marker61740
CAATAATTTGGTATTTTACTCTTGTCTGCAAGAGATTTTTCTGTTATTTGTTAATTTATTGTCGTATTTGCATAATCAGGGTTTTGATGGTCAATTGGGCXXXXXXXXXXAGATGGAAAATGATAGGTTGGATGAGACAATGTGCCCCCAAGTTTAAGTGACATAGAAGATAAACCTACACATGACCCCTGTTTGCCAGGTTTTCATCAT
CAATAATTTGGTATTTTACTCTTGTCTGCAAGAGATTTTTCTGTTATTTGTCAATTTATTGTCGTATTTGCATAATCAGGGTCTTGATGGTCAATTGGGCXXXXXXXXXXCGATGGAAAATGATAGGTTGGATGAGACAATGTGCCCCCAAGTTTAAGTGACATAGAAGATCAACCTACACATGACCCCTGTTTGCTAGGTTTTCATCAT
* * * * *
>Marker130193
AAATTTTGGTCAGATTCAAGCAGATATTGTTGCAGGATGAAAAGCTCCATGTTTTTAGCTTTGGAGTAGATTTCTAAGGTTGTATATGTGCTGCAAATGAXXXXXXXXXXTGAGGGTTGAGCGCACCAACACATAGTCCACCTCACTCTCCTTCATCAGATGTGCGGTGGTGCACTAAGGCCTTTTAGTGGCCAATCTTGGCAAAATAAA
AAATTTTGGTCAGATTCAAGCAGATATTGTTGCAGGATGAAAAGCTCCATGTTTTTAGCTTTGGAGTAGATTTCTAAGGTTGTATATGTGCTGCAAATGAXXXXXXXXXXTGAGGGTTGAGCGCACCAACACATAGTCCAACTCACTCTCCTTCATCAGATGTGCGGTGGTGCACTAAGGCCTTTTAGTGGCCAATCTTGGCAAAATAAA
*
>Marker213458
GATTATAAACAACCCACACTGTTGCTCTACCCTCTTCACTACCCAACCACCTCATCCTGTCTTCATTCCTAGAAATAGGTTCCCTGATCAACTTAACTAAXXXXXXXXXXTTTCTTAGAAGATTGTTGCATATTTTAAGGAAATTTTAAATGCTGGAACCCTCAAGAAGAATGACATTTTTGTTGAAGAGATAATCCACATCATTCTATA
GATTATAAACAACCCACACTGTTGCTCTACCCTCTTCACTACCCAACCACCTCATCCTGTCTTCATTCCTAGAAATAGGTTCCCTGATCAACTTAACTAAXXXXXXXXXXTTTCTTAGAAGATTGTTGCATATTTTAAGGAAATTCTAAATGCTGGAACCCTCAAGAAGAATGACATTTTTGTTGAAGAGATAATCCACATCATTCTATA
*
>Marker102186
AACACATTTGATGGAGGGATTCAATTTCTTTCATATGCATATGTGTTGGTTATCATAGGCACATTTGGTTTCGGTGCACTAAAATGAACATAACTTGCTGXXXXXXXXXXGGGGATCAAAAACATGTTAACTTGTCTTTCTTTTGTCAGCCTTAGAGTGGGCCTGCTCTTGAGCCAAATCCACAAGGAGAACTCATTTGCGACCCCAAGT
AACACATTTGATGGAGGGATTCAATTTCTTTCATATGCATGTGTGTTGGTTATCATAGGCACATTTGGTTTCGGTGCACTAAAATGAACATAACTTGCTGXXXXXXXXXXGGGGATCAAAAACATGTTAACTTGTCTTTCTTTTGTCAGCCTTAGAGTGGGCCTGCTCTTGAGCCAAATCCACAAGGAGAACTCATTTGCGACCCCAAGC
* *
>Marker46344
CTTAAAATGGGTGCCTCCCTTATTAAGCATGGTTTGTTTTGGAGTTGTAATAGTGGCTTAGATGCCCTATTCTGGATTGATTCTTGGGATGGTTGTCCACXXXXXXXXXXTATTATGTTGCTTCAGGATATCAGGAGTTGGATGGTTAGCAATTTGGGGAGTCATACTTTCCTTGGTGGAAATTTGTGTGGAATAAGTTTGCCTGGCCTA
CTTAAAATGGGTGCCTCCCTTATTAAGCATGGTTTGTTTTGGAGTTGTAATAGTGGCTCAGATGCCCTATTCTGGATTGATTCTTGGGATGGTTGTCCACXXXXXXXXXXTATTATGTTGCTTCAGGATATCAGGAGTTGGATGGTTAGCAATTTGGGGAGTCATACTTTCCTTGGTGGAAATTTGTGTGGAATAAGTTTGCCTGGCCTA
*
>Marker117336
TAGAGATCTGATTAAGATTTCAAACTTGCATATTGCTAAATTCTAAGGTTTATATTTCATGTTTTCAAGTTGTATTATTATTGGTTATGATTTGAAATTTXXXXXXXXXXAGGTGGCATTCATGCCTTAGATTTCACCTAAGTTGAGAAGTGTATCAAAACACCTATCATCATATTGGTTGTAGAGGGAGGGCCTTTAAGGAGAATTCTT
TAGAGATCTGATTAAGATTTCAAACTTGCATATTGCTAAATTCTAAGGTTTATATTTCATGTTTTCAAGTTGTATTATTATTGGTTATGATTTGAAATTTXXXXXXXXXXAGGTGGCATTCATGCCTTAGATTTCACCTAAGTTGAGAAGTGTATCAAAACACCTATCGTCATATTGGTTGTAGAGGGAGGGCCTTTAAGGAGAATTCTT
*
>Marker146785
ATATTGTTGGCTGAAAGTGTGACACAGGTTTGTGCTTTTACCCTACCGCATTTAGAGAAAAGTTGCAGAAGTTTGATTAAGGCCTTCACAGTGTATATCCXXXXXXXXXXAGATGTGTAATGCATGCTTTCTCATAGTATTAGGTGTTCTTATGGTCCGCAAGGTTAGATTTCAAGTAACAGAAGTAACACAGACAGTTCCAGATGCAGA
ATATTGTTGGCTGAAAGTGTGACACGGGTTTGTGCTTTTACCCTACCGCATTTAGAGAAAAGTTGCAGAAGTTTGATTAAGGCCTTCACAGTGTATATCCXXXXXXXXXXAGATGTGTAATGCATGCTTTCTCATAGTATTAGGTGTTCTTATGGTCCGCAAGGTTAGATTTCAAGTAACAGAAGTAACACAGACAGTTCCAGATGCAGA
*
>Marker409450
CTTCTTGTTGTTATCCTTCTTAGTTGTGTTTGAGCTAACTAAACAGGAACTTTAAAGATTTGATGTTACACAGACAAACTAAGATGACAGAAACTGGTATXXXXXXXXXXACAAGGAAGTGACGACATGGACACAATCCGTGTTTGTCATTTCCTTAATTTAACCAACCAGAGCAACAAATAGAGGAGGATGAGATAAGAAAACTGAAGC
CTTCTTGTTGTTATCCTTCTTAGTTGTGTTTGAGCTAACTAAACAGGAACTTTAAAGATTTGATGTTATACAGACAAACTAAGATGACAGAAACTGGTATXXXXXXXXXXACAAGGAAGTGACGACATGGACACAATCCGTGTTTGTCATTTCCTTAATTTAACCAACCAGAGCAACAAATAGAGGAGGATGAGATAAGAAAACTGAAGC
*
>Marker288895
TGGTTTTCCTGTTATAAACTATTGTAGGCAGTGAGCCTCTTGTGAGTAGTGTGCTCAGGTAATGAGCCCTAATTGGCATGTGCCATTTTGTTCCTTCTATXXXXXXXXXXCTCTATCAAAGACCAATTTGAAAAAGGAGCTCAACATCCTCAGCTTATGTGTGTTAGAGTTAGTTAATGTGTTTTCTGTGTATGAGTGTTTTAGTATTTA
TGGTTTTCCTGTTATAAACTATTGTAGGCAGTGAGCCTCTTGTGAGCAGTGTGCTCAGGCAATGAGCCCTAATTGGCATGTGCCATTTTGTTCCTTCTATXXXXXXXXXXCTCTATCAAAGACCAATTTGAAAAAGGAGCTCAACATCCTCAGCTTATGTGTGTTAGAGTTAGTTAATGTGTTTTCTGTGTATGAGTGTTTTAGTATTTA
* *
>Marker184590
TAAATAGCCAAAAGCTTTGTCATGTTCATTAAGCCATACCCTCTTTTACCTAGCATATCCTAGTTTAGGATCAGTTTCTACTATATGCTTAGTATGACCTXXXXXXXXXXAATTGGTTGTGACCTTAGTGTATTACATAAGTTAAATTAGGCCTAGTGTTGAAAGTATAATTTTGTGACAAAATAAGATAATCAAACTACACCAATTAAA
TAAATAGCCAAAAGCTTTGTCACGTTCATTAAGCCATACCCTCTTTTACCTAGCATATCCTAGTTTAGGATCAGTTTCTACTATATGCTTAGTATGACCTXXXXXXXXXXAATTGGTTGTGACCTTAGTGTATTACATAAGTTAAATTAGGCCTAGTGTTGAAAGTATAATTTTGTGACAAAATAAGATAATCAAACTACACCAATTAAA
*
>Marker115306
TTTGAGCCTCTTGTGCCCATACAAAACAATTTGGCTCAGGATAACGATTGGTGTAATCTATGTAATCAGCCACACGATCAGAATTTGTGCCAAAGTGGACXXXXXXXXXXCATCATCTTCTCATATGTCCCAAACGGCTGCAAGTGGAGAATGAGTGGCAGCGAGTATTCCATCAAAATAGGTAGACTGTCCTATTGGATAGATAAATTT
TTTGAGCCTCTTGTGCCCATACAAAACAATTTGGCTCAGGATAACGATTGGTGTAATCTATGTAATCAGCCACACGATCAGAATTTGTGCCAAAGTGGACXXXXXXXXXXCATCATCTTCTCATATGTCCCAAATGGCTACAAGTGGAGAATGAGTGGCAGCCAGTATTCCATCAAATCAGGTAGACTGTCCTATTGGATAGATAAATTT
* * * **
>Marker39955
AGACTATGACAAGGCATTAGGCCTTGATCACCATCACCTTAAATGTTTGTTTGGAAAAGACCATGCTTTCCATTTTCTTGGAGAATATAAATTAACTTGCXXXXXXXXXXATGATAGAAGTGAAGGCAAAACTTGGTTATCTTAGATAGGATTTAGAGGCTAAAATCATTTCTTCTGCATCATCATCTCTAAAGATATTGCAACAGTTAC
AGACTATGACAAGGCATTAGGCCTTGATCACCATCACCTTAAATGTTTGTTTGGAAAAGACCATGCTTTCCATTTTCTTGGAGAATATAAATTAACTTGCXXXXXXXXXXATGATAGAAGTGAAGGCAAAACTTGGTTATCTTAGATAGGATTTAGAGGCTAAAATCATTTCTTCTGCATCATCATCTCTGAAGATATTGCAACAGTTAC
*
>Marker130947
ATACCTAGGGACAAGTTGCAGAAGCTTGGCTAAGGCTTTCACATTGTATATCCTAAGTCAAAATTACAATATTTTGTTCTACATTCCTCCACAGTGTGATXXXXXXXXXXCTATATTAGGTGTTCTTATGGTCCACAAGGTCAACTTTCAAATGACAGAAGTAATACAGATAGTTCTAGATGTAGAAGTGTTCTATAGAACACATGTTTG
ATACCTAGGGACAAGTTGCAGAAGCTTGGCTAAGGCTTTCACATTGTATATCCTAAGTCAAAATTACAATATTTTGTTCTACATTCCTCCACAGTGCGATXXXXXXXXXXCTATATTAGGTGTTCTTATGGTCCACAAGGTCAACTTTCAAATGACAGAAGTAATACAGATAGTTCTAGATGCAGAAGTGTTCTATAGAACACATGTTTG
ATACCTAGGGACAAGTTGCAGAAGCTTGGCTAAGGCTTTCACATTGTATATCCTAAGTCAAAATTACAATATTTTGTTCTACATTCCTCCACAGTGCGATXXXXXXXXXXCTATATTAGGTGTTCTTATGGTCCACAAGGTCAACTTTCAAATGACAGAAGTAATACAGATAGTTCTAGATGTAGAAGTGTTCTATAGAACACATGTTTG
* *
>Marker509428
CTCCTCATCTTGCCTCTCAAAATCAACAATCTCATCTTCTGTAAACATGAGGTCCTCATCTTGGGTAGTCCAATTGCTATATGGATCAATGTCATCCAAGXXXXXXXXXXAGTTGCAAAGAAGACATTCACAAGTTTGTAAGTAAGCAATAAATGCACACATCAAAGATTTGAAGTGAAATGAAGTGAAGACTAAGATTTTGTGTTACTT
CTCCTCATCTTGCCTCTCAAAATCAACAATCTCATCTTCTGTAAACATGAGGTCCTCATCTTGGGTAGTCCAATTGCTATATGGATCAATGTCATCCAAGXXXXXXXXXXAGTTGCAAAGAAGACATTCACAAGTTTGTAAGTAAGCAATAATTGCACACATCAAAGATTTGAAGTGAAATGAAGTGAAGACTAAGATTTTGTGTTACTT
*
>Marker203871
ACTTTTGGGTGGCTTTTTGGCTCATGTTTTTGTAATTACCATTGACGATTTTGTTGAACACACAGAATACTGAGAGGGGAGGTGAATCAATATTCTCTTAXXXXXXXXXXAACTTGTTTCCCAATGACTCATTGTCCTGAAAGAAAGAGATAGAAGAGGTGGCTCACTACTAGAGTTGAACTGTTATAATTGTATCTAATATATGCAAGG
ACTTTTGGGTGGCTTTTTGGCTCATGTTTTTGTAATTACCATTGACGATTTTGTTGAACACACAGAATACTGAGAGGGGAGGTGAATCAATATTCTCTTAXXXXXXXXXXAACTTGTTTCCCAATGACTCATTGTCCTGAAAGAAAGAGATAGAAGAGGTGGCTCACTACTAGAGTTGAACTGTTATAATTGCATCTAATATATGCAAGG
*
>Marker121843
CATTTGTGAAATCACTACCAATTGTCCTAACATAGCAATAGGTAATCTTTGACTGACAAGATGAACATTGAAAACAATCTAAGATTTAAGAGCCTCCTGAXXXXXXXXXXTTTTGCTTAATCAGGTCAACTATTTCCTTATTGTTACTAGATGATTTCTTCAACTTACTTCTACAATACTGTGCCTTATGTCCTAACTTATGACATCTAT
CATTTGTGAAATCACTACCAATTGTCCTAACATAGCAATAGGTAATCTTTGACTGACAAGATGAACATTGAAAACAATCTGAGATTCAAGAGCCTCCTGAXXXXXXXXXXTTTTGCTTAATCAAGTCAACTATTTCCTTATTGTTACTAGATGATTTCTTCAACTTACTTCTACAATACTGTGCCTTATGTCCTAACTTATGACATCTAT
* * *
>Marker345247
TCCATTGTCAATAATAACTTTACAACACTTATCTCTAGCTTTGCATCTAGTTCTAAACAAGTTCTTTCTTTGCACTGGTCCTTTTTCCTCAAGGCACTTCXXXXXXXXXXCTTTGTGGTATACATCACCTTCTCCTTTGTCTTTGTAGTGGTAGCTGCTATTTTCTTGGCTTTTGCGGTAAGTGTCATGGCTTCTCTCTCCATTATTGTA
TCCATTGTCAATAATAACTTTACAACACTTATCTCTAGCTTTGCATCTAGTTCTAAACAAGTTCTTTCTTTGCACTGGTCCTTTTTCCTCAAGGCACTTCXXXXXXXXXXCTTTGTGGTATACATCACCTTCTCCTTTGTCTTTGTAGTGGTAGCTGCTATTTTCTTGGCTTTTGCGGTAAGTGTCGTGGCTTCTCTCTCCATTATTGTA
*
>Marker110632
GCAGATTCAAGTATATCATGTTTTGATCATTCTAATATTGCTCACTCTTCTCATTATGAGGATTCTCACTTGGTTAATTCTAGTATGTAGGTTAAGAATGXXXXXXXXXXGCTTTCTTGGGAGGTTGCTTTGGAAGGTAAGGCTAATCATAAGTATGTTTCTCTTGCATTTGAGCATGAAAGTGTGTCAAATGATGATGCTATTGATTCA
GCAGATTCAAGTATATCATGTTTTGATCATTCTAATATTGCTCACTCTTCTCATTATGAGGATTCTCACTTGGTTAATTCTAGTATGTAGGTTAAGAATGXXXXXXXXXXGCTTTCTTGGGAGGTTGCTTTGGAAGGTAAGGCTAATCATAAGTATGTTTCTCTTGCATTTGAGCATGAAAGTGTGTCAAATGATGATGTTATTGATTCA
*
>Marker94355
ACTGATGTGGGTAAAGTTTTGAGCATACATGGATTTGTAGATTTAGATTGGGTTGGAGATCTAGAAAACTAGAGGTCAACAAATAGTTATGCTTTTATTCXXXXXXXXXXTTAGTATCATTTTGTGAGGGAGATGGTTGAGAACAAAAAATTCCAAATGGAGTAGATTGGCTCTCGGGTAAATACTACTAACTCTTTGACAAAACTTGTA
AATGATGTGGGTAAAGTTTTGAGCATACATGGATTTGTAGATTTAGATTGGGTTGGAGATCTAGAAAACTAGAGGTCAACAAATAGTTATGCTTTTATTCXXXXXXXXXXTTAGTATCATTTTGTGAGGGAGATGGTTGAGAACAAAAAATTCCAAATGGAGTAGATTGGCTCTCGGGTAAATACTACTAACTCTTTGACAAAACTTGTA
*
>Marker354402
CATATTTCTGATTTCTTCTATCTAATTTACCAATTCTATCACCAGAATCATCTAAAGAAGATGGATATTGCTCTACATATGCATCATTCCCAATTGAAGGXXXXXXXXXXGACAACAACCAATAATATAATCAATTCCCTAGTAGCGGTGCCAGTTTTGTTGGTGCACAAAGTAGATGTTCCCCAAATCCCTAAAGCTGACCAATTCTTG
CATATTTCTGATTTCTTCTATCTAATTTACCAATTCTATCACCAGAATCATCTAAAGAAGATGGACATTGCTCTACATATGCATCATTCCCAATTGAAGGXXXXXXXXXXGACAACAACCAATAATATAATCAATTCCCTAGTAGCAGTGCCAGTTTTGTTGGTGCACAAAGTAGATGTTCCCCAAATCCCTAAAGCTAACCAATTCTTG
* * *
>Marker73209
TCATTTTTGGAGGAATCTTTAATCATAGCACAACAAGACTTAGGCCCTTGACAATAGAGGGTCTCCTCTTCTACACTTTTAGCTTTGTTAAGCCTAATCCXXXXXXXXXXATAAGTTTGATTAGCTAGATGCTTGGTCATAGATTATCCAAACAAATAACAAATCTTCCATCCTAACATAATAGGCATATATCCAAACAGGATAGGCAAA
TCATTTTTGGAGGAATCTTTAATCATAGCACAACAAGACTTAGGCCCTTGACAATAGAGGGTCTCCTCTCTTACACTTTTAGCTTTGTTAAGCCTAATCCXXXXXXXXXXATAAGTTTGATTAGCTAGATGCTTGGTCATAGATTATCCAAACAAATAACAAATCTTCCATCCTAACATAATAGGCATATATCCAAACAGGATAGGCAAA
**
>Marker232690
ATGTTTTCCTTAGTTTTAGAGGACCGGATGTCCGAAAGTCTCTTGTAGATCATCTCTTCCAAGCTCTCACTGCAGCTGGAATTCATGTTTTTCTAGACACXXXXXXXXXXTACAGTAAAGGTAGATTTGAGACACGCATAATTGACGAATGGAAGGATGCTCTTCATTACATCTCCTCCTTATCTGGATGGTCTCTTCACATGACCGCAG
ATGTTTTCCTTAGTTTTAGAGGACCGGATGTCCGAAAGTCTCTTGTAGATCATCTCTTCCAAGCTCTCACTGCAGCTGGAATTCATGTTTTTCTAGACACXXXXXXXXXXTACAGTAAAGGTAGATTTGAGCCACACATAATTGACGAATGGAAGGATGCTCTTTATTACATCTCCTCCTTATCTGGATGGTCTCTTCACATGACCGAAG
* * * *
>Marker202855
AAGGAATTGATCTCTCAAGTCTTGATCCCCATCATGCGGTGGGTTTGCAAATTTTTCTTAACCATCATACTTAAAAGGTAATGAGTATTTGGCAATCCCCXXXXXXXXXXCTGATCCTCATGGTATCAAGTATTCTTGAGGTATTCTTGAGTCCCAATCTTCGTTATATTACAAGCTCCTAGACTTTTCCCTACCATTACACCCAAAAAG
AAGGAATTGATCTCTCAAGTCTTGATCCCCATCATGCGGTGGGTTTGCAAATTTTTCTTAACCATCATACTTAAAAGGTAATGAGTATTTGGCAATCCCCXXXXXXXXXXCTGATCCTCATGGTATCAAGTATTCTTGAGGTATTCTTGAGTCCCAATCTTCGTTATATTACAAGCTCCTCGACTTTTCCCTACCATTATACCCAAAAAG
* *
>Marker280926
AATTGCCAACGCTAGGATATTCCCAGATCGGGTCTGAATAGAGCATGTTTAGAACCCGTGACCACCATTTGTAGCGCTAGAAGATATAAACTGAAATCGTXXXXXXXXXXTATCATCCAAAGGTCAAAGGCCACTATATCGTGACTTTGTCCGGATAATCTTGTGAGCTATGTAACTCGGCAAGAAATTTGGCAAATCATATCTAAATTT
AATTGCCAACGCTAGGATATTCCCAGATCGGGTCTGAATAGAGCATGTTTAGAACCCGTGACCACCATTTGTAGCGCTAGAAGATATAAACTGAAATCGTXXXXXXXXXXTATCATCCAAAGGTCAAAGGCCACTATATCGTGACTTTGTCCGGATAATCTTGTGAGCTATGCAACTCGGCAAGAAATTTGGCAAATCATATCTAAATTT
*
>Marker125306
CTTTATTCTTTTAACATAGAATACAATCTTGGGTTAGTCACGCTGTGGTTTTTTCCCTTAATAGGGTTTCCACGTAAAAATCCTTGTGTCATGTGTTAATXXXXXXXXXXTCACTTTCTGCTTTAACAATTCAAAAATCTTATTTTCTCCTAATGTCCACTTGAAATCCTTTCTATCACCTCTCATTATCTCTGTCATAGGTGTGCATAC
CTTTATTCTTTTAACATAGAATACAATCTTGGGTTAGTCACCCTGTGGTTTTTTCCCTTAATAGGGTTTCCACGTAAAAATCCTTGTGTCATGTGTTAATXXXXXXXXXXTCACTTTCTGCTTCAACAATTCAAAAATCTTATTTTCTCCTAATGTCCACTTGAAATCCTTTCTATCATCTCTCATTATCTCTGTCATAGGTGTGCATAC
* * *
>Marker433063
GCACTTCTGGGCTAAAATCATATTTATATAGATGTTTTGGTGTCTTAGCCACTACTTTGGATTCACTAGCCGGATCTCTCTATCCTTGAAAAATCACCTTXXXXXXXXXXCATCACTATGTTCCTCAATATGGGATGGTCTTCTCTGCTATTGATTCTAGCTCTAAATGCCTCAATGTCTGTGTTACCAGAATGGGTGTCTTTGCAAAGC
ACACTTCTGGGATAAAATCATATTTATATAGATGTTTTGGTGTCTTAGCCACTACTTTGGATTCGCTAGCCGAATCTCTCTATCCTTGAAAAATCACCTTXXXXXXXXXXCATCACTATGTTCCTCAATATGGGATGGTCTTCTCTGCTATTGATTCTAGCTCTAAATGCCTCAATGTCTGTGTTACCAGAATGGGTGTCTTTGCAAAGC
* * * *
>Marker175937
ATTATCCTGAGGGATGGGAAGAGGGATAAATAAGGCCTCTCTTCCCCCAAGCCCAATCTGGAGACTCACAATAAAATAGAGTTATTGGAATTGCCAGACAXXXXXXXXXXGGGGGCTAGGGGTTCCTACTTATAGCAAGATAACAGATGCTCCACCCTTCAACGGTCCTAACAGCCAGCACCCTGATCAACCCAGCCTCGCCATCAATGT
ATTATCTTGAGGGATGGGAAGAGGGATAAATAAGGCCTCTCTTCCCCCAAGCCCAATCTAGAGACTCACAATAAAATAGAGTTATTGGAATTGCCAGACAXXXXXXXXXXGGGGGCTAGGGGTTCCTACTTATAGCAAGATAACAGATGCTCCACCCTTCAACGGTCCTAACAGCCAGCACCCTGATCAACCCAACCTCGCCATCAATGT
* * *
>Marker222650
TCAAATTGCTCCTATTTGGAAAAATTGTTCTTCTTGACAAATGGGACAAAATACAATTGATATGGATTATATTGTTATAGAATAGCACCATAGAAAATGTXXXXXXXXXXAATTACACTGAAATGAAAAGGAGATTATTGATCAATTTTAATTTGATAAGGGTGTTGTAGTGGATGGTTTCTTACATGAATCACTGAAAACTCTATAAAG
TCAAATTGCTTCTATTTGGAAAAATTGTTCTTCTTGACAAATGGGACAAAATACAATTGATATGGATTATATTGTTATAGAATAGCACCATAGAAAATGTXXXXXXXXXXAATTAGACTAAAATGAAAAGGAGATTATTGATCAATTTTAATTTGATAAGGGTGTTGTAGTGGATGGTTTCTTATATGAATCACTGAAAACTCTATAAAG
* * * *
>Marker79487
GGGATCCTGTGGTGGTCTCTCTCCCATTATGTTTTCTTCTGATTCTGAATGAAATTGAATCCTTCTCCTTCTGCATGTGATGAACTCAGTGTCTTCTAGAXXXXXXXXXXGCATTAGAAACTAATACATTCATCCGCTAAGAGCAGGCATCTTCTTATCAGTAGGCATCCACTTATGTAGTGGGGGTTCTCCACTTATTTAGTGGGTGAA
GGGATCCTGTGGTGGTCTCTCTCCCATTATGTTTTCTTCTGATTCCGAATGAAATTGAATCCTTCTCCTTCTGCATGTGATGAACTCAGTGTCTTCTAGAXXXXXXXXXXGCATTAGAAACTAATACATTCATCCGCTAAGAGCAGGCATCTTCTTATCAGTAGGCATCCACTTATGTAGTGGGGGTTCTCCACTTATTTAGTGGGTGAA
*
>Marker130980
TTGTTGGCAAATCTCATAGGACATCTTAGGTCTATACTCTTCGTGAAGGGTAGGGCCATTTCCAGGAAGGAAGGTGTGCGGGAGACCGTCGGTCTGTGGTXXXXXXXXXXGAAAAATTTTATCACCTTTTACCTCTTCGAATTTACTTCATGTAATTACTTGAATTTAGAGTTATTGAAAACTATGGATATTACAGTTTGGTTGACGAAA
TTGTTGGCAAATATCATAGGACATCTTAGGTCTATACTCTTCGTGAAGGGTAGGGCCACTTCCAGGAAGGAAGGTGTGCGGGAGACCGTAGGTCTGTGGTXXXXXXXXXXGAAAAATTTTATCACCTTTTACCTCTTCGAATTTACTTCATGTAATTACTTGAATTTAGAGTTATTGAAAACTATGGATATTACAGTTTGGTTGACGAAA
* * *
>Marker175886
TATAAAGTGAACATCAAAGAACATGTTAAACTATGCTAACCTATCCCATTCAAAATTAAATGCAACTGCCAATTAGAACAAATAGGAATGCATATACAAAXXXXXXXXXXAGTGGCATGATTTGATTGGTGCACAAGGAGGGGTTCAAGATTCAAGGGAGATAAATGGTGGAGGATCTCCTTGGAAGAAGTGGATGGTGAGGATCAAAAG
TATAAAGTGAACATCAAAGAACATGTTAAACTATGCTACCCTATCCCATTCAAAATTAAATGCAACTGCCAATTAGAACAAATAGGAATGCATATACAAAXXXXXXXXXXAGTGGCATGATATGATTGGTGCACAAGGAGGGGTTCAAGATTCAAGGGAGATAAATGGTGGAGGATCTCCTTGGAAGAAGTGGATGGTGAGGATCAAAAG
* *
>Marker74935
GAGACTTCAGCAGTAGCTCTTCTCCTACTAGGAGGTGTATGAGTAGTTCTAAGGGATTTGGAAGAAGCAGTAGTAGGTGTAGACCTACTTGTCCTTCTAGXXXXXXXXXXACACTCTATAAGCAAAATATTCATCCCGATGAGAAATACCCCGAAACCCATATCAAATGGGAACTATGGGCCCATTTAATGCTTAAGTCTAGACTAAAAA
GAGACTTCAGCAGTAGCTCTTCTCCTACTAGGAGGTGTATGAGCAGTTCTAAGGGATTTGGAAGAAGCAATAGTAGGTGTAGACCTACTTGTCCTTCTAGXXXXXXXXXXACACTCTATAAGCAAAATATTCATCCCAATGAGAAATACCCTGAAACCCATATCAAATGGGAACTATGGGCCCATTTAATGCTTAAGTCTAGACTAAAAA
* * * *
>Marker435722
TTAGTGTTACAGATATGTGAATTGATTGGACAGACAATTTCTTGATACTGCAATCACCATATGCCTGTTGAATTGAACATCAATGTAGGATATGCCGTTAXXXXXXXXXXTGCCATTGTATCAATTGAACAAGAGGAGGTTATTGCTACACAGATATTGGATTTGAAGAGTAATATTGTAGGAGCAAAGAGTGTTAGAATGATAAATCCT
TTAGTGTTACAGATATGTGAATTGATTGGACAGACAATTTCTTGATACTGCAATCACCATATGCCGGTTGAATTGAACATCAATATAGGATATGCCGTTAXXXXXXXXXXTGCCATTGTATCAATTGAACAAGAGGAGGTCATTGCTACACAGATATTGGATTTGAAGAGTAATATTGTAGGAGCAAAGAGTGTTAGAATGATAAATCCT
* * *
>Marker182179
CAGCTTTCAATGGTTATTGTTATTCATGTAATAAATTCGGTCATAAGGCTACTCAATGTAGGAGTAGAATGGATCAAAATGTCCCATCCTTCTCCGGTCAXXXXXXXXXXGATAAGATAGTTAGATCTTTCAGTGACTACTGTTATACAATATACATGCAAGAAACTTGGACATAAAGCTAACCAATGCAGATCCAAAATGAATGAAAGA
CAGCTTTCAATGGTTATTGTTATTCATGTAATAAATTCGGTCATAAGGCTACTCAATGTAGGAGTAGAATGGATCAAAATGTCCCATCCTTCTCCGGTCAXXXXXXXXXXGATAAGATAGTTAGATCTTTTAGTGACTACTGTTATACAATATACATGCAAGAAACTTGGACATAAAGCTAACCAATGCAGATCCAAAATGAATGAAAGA
*
>Marker111535
AATGCTATATAAAATTGTTATCAATTTGTATCAATTTTATATATCAAGTTTATGTCAATTTTGTATAAAATTTATATCAATTGTGGAAAGGTAAAAGATAXXXXXXXXXXAATAACTGAATTTGACTGCAATGCACAATTAAATAACATATTCTTATTCATTACATGACATCAAATAATCTACATGATCAAATACATATTCTTACATATA
AATGCTATATAAAACTGTTATCAATTTGTATCAATTTTATATATCAAGTTTATGTCAATTTTGTATAAAATTTATATCAATTGTGGAAAGGTAAAAGATAXXXXXXXXXXAATAACTGAATTTGACTGCAATGCACAATTAAATAACATATTCTTATTCATTACATGACATCAAATAATCTACATGATCAAATACATATTCTTACATATA
*
>Marker52898
GAAATAATTTTTGGAAAGTTTTGTTATTGTTTAATTGGATGATATTTTGATTTTCAGTAAGACTTGGGATGAGCATCTGATGCATATTAGAAGAGTTCTAXXXXXXXXXXCCCAATTATCTACAAGCCTAATCAAGGGCTCCCATGGAATATGTCACAAGATACCTTATCTCCTCAAGACAGATAATGAGAGAGTCCTTTGACATCTTGT
GAAATAATTTTTGGAAAGTTTTGTTATTGTTTAATTGGATGATATTTTGATTTTCAGTAAGACTTGGGATGAGCATCTGATGCATATTAGAAGAGTTCTAXXXXXXXXXXCCCAATTATCTACAAGCCTAATCAAGGGCTCCCATGGCATATGTCACAAGATACCTTATCTCCTCAAGACAAACAATGAGAGAGTCCTTTGACATCTTGT
GAAATAATTTTTGGAAAGTTTTGTTATTGTTTAATTGGATGATATTTTGATTTTCAGTAAGACTTGGGATGAGCATCTGATGCATATTAGAAGAGTTCTAXXXXXXXXXXCCCAATTATCTACAAGCCTAATCAAGGGCTCCCATGGCATATGTCACAAGATACCTTATCTCCTCAAGACAGACAATGAGAGAGTCCTTTGACATCTTGT
* * *
>Marker100399
CTCTTGAGAGAGATGATGTAAATTCTGTATATAAAAAAATTTGGATTTGCAAATGGAAATGATTAAACAATGAAATACATAACCTAAACCCAAATCATTCXXXXXXXXXXCAAATGGATGGTTAAGATCAAAAGGCTAAATACTTGATGTGGATGGCTAGGATTGATTAGTTATTCCCACTCTTCAAGGGAGTTGTAGTCATGTAACAAG
CTCTTGAGAGAGATGATGTAAATTCTGTATATAAAAAAATTTGGATTTGCAAATGGAAATGATTAAACAATGAAATACATAACCTAAACCCAAATCATTCXXXXXXXXXXCAAATGGATGGTTAAGATCAAAAGGCTAAATACTTGATGTGGATAGCTAGGATTGATTAGTTATTCCCACTCTTCAAGGGAGTTGTAGTCATGTAACAAG
CTCTTGAGAGAGATGATGTAAATTCTGTATATAAAAAAATTTGGATTTGCAAATGGAAATGATTAAACAATGAAATACATAACCTAAACCCAAATCATTCXXXXXXXXXXCAAATGGATGGTTAAGATCAAAAGGCTAAATACTTGATGTGGATGGCTAGGATTGATTAGTTATTCCCACTCTACAAGGGAGTTGTAGTCATGTAACAAG
* *
>Marker147653
CAATTTTATAGAGGATCATTGTGAAGAACTTCCCTCTTCCCCTCCTAAGTATCCTCCTCTTAATTCTACTCCAACACCTTCTCGTCCAATAGATTTTCAAXXXXXXXXXXAGTAACTTCTCAGGAGTAGATACCTACTAATAATACACGTCAATAGTTCAGTAAAATCATTTAGCATAAAAAGAGGGTTATCCAATCACCAATAAATTAT
CAATTTTATAGAGGATCATTGTGAAGAACTTCCCTCTTCCCCTCCTAAGTATCCTCCTCTTAATTCTACTCCAACACCTTCTCATCCAATAAATTTTCAAXXXXXXXXXXAGTAACTTCTCAGGAGCAGATACCTACTAATAATACACGTCAATAGTTCAGTAAAATCATTTAGCATAAAAAGAGGGTTATCCAATCACCAATAAATTAT
* * *
>Marker149004
TAAAAGGTTGAAAAAGGCAAGGAAAAGAAAGTTCAAACTAAAAAATAAGTTGCTCCAGAAGAAGAA--A-CTCAAACTGAGGCTCCGATAAGAATTCCTAAAAXXXXXXXXXXCCTGCAAACAAGAATGTGATTGGAACAAAGTGGGTTTTCTAGAACAAACTGAATGAACTTGGAGAAGTTGTGAGAAACAAGGAAAGACTTGTATGTAAAG
TAAAAGGTTGAAAAAGGCAAGGAAAAGAAAGTTCAAACTGAAAAACAAGTTGCTCCAGAAGAAGAAGAATTTCAAACTGAGGCTCCGATAAGAATTCCT---AXXXXXXXXXXCCTGCAAACAAGAATGTGATTGGAACAAAGTGGGTTTTTTGGAACAAACTGAATGAACTTGGAGAAGTTGTGAGAAACAAGGAAAGACTTGTATGTAAAG
* * * * *
>Marker90960
CACTTTTCTTGCATATTGGGGCCAAATTAGTGACCCAAGTGGAATGCCTAACTGAAAAAATGATCCTTGTAGAAAACAACTTCTTAACCTCTTCAAATATXXXXXXXXXXGCTCATATTCACCTCCATCTATTTTAGGCAGGTCTTTTTGTTTGATCATACTATTCAAATCAAATGCTCTCTCTAACTCAATCATTCCTTTCAGAATTTT
CACTTTTCTTGCATATTGGGGCCAAATTAGTGACCCAAGTGGAATGCCTAACTGAAAAAATGATCCTTGTAGAAAACAACTTCTTAACCTCTTCAAATATXXXXXXXXXXGCTCATATTCACCTCCATCTATTTTAGGCAGGTCTTTTTGTTTGATCATACTATTCAGATCAAATGCTCTCTCTAACTCAATCATTCCTTTCAGAATTTT
*
>Marker499809
TAAATGTAATACTAAAAGTAAATAAGTAGGAAAAGATATCCAAAATGATACTATAAAGGATGCAGTATGTCACTAAGTGATGGAATGGATCACCCATCTT-------------XXXXXXXXXXGGTGAAAAAGGCTTTAGTAGGGTCATTTTTGTAAAATAACACCCAAGAAAAAGGCATATGATAGAATAGAGGGTAAAACTAGGATTCCAATGCAATGAAG
#NAME?
*
>Marker74491
TATGGATACTACACATGTCTCTAAGGAGGCATTTTGGTTATGGAGATTGTGTGTAGGTATTGGTTTTAATTGTAAGATCATTTAGATTAGCTATGATAGCXXXXXXXXXXTATGGGTGTATTTACAATGTATGATGTCAAGTGGGAGAATGTCGGAATTAAGGTGTCATCAACCTTGTAAATTTCATGTTTATTTATTCCTATTATTGTT
TATGGATACTACACATGTCTCTAAGGAGGCAGTTTGGTTATGGAGATTGTGTGTAGGTATTGGTTTTAATTGTAAGATCATTTAGATTAGCTATGATAGCXXXXXXXXXXTATGGGTGTATTTACAATGTATGATGTCAAGTGGGAGAATGTTGGAATTAAGGTGCCATCAACCTTGTAAATTTCATGTTTATTTATTCCTATTATTGTT
* * *
>Marker224010
CCT--ATTAGTAAAGTATATAACTATAACACATGGTGAATACTGCATACCCTACACTTTTCTCATTTATTGGGTTTAGATTTCCCTTTGAACAATAACTAGCXXXXXXXXXXTTGCAACTTGACTATGAAATACATTATATTCTAAAGTGTTGTATACAAGGACAAACCTTAAAATTCATTATGATAATATAGAAAACATTGGGAGACTTCT
CCTAAATTAGTAAAGTATATAACTATAACACATGGTGAATACTGCATACCCTACACTTTTCTCATTTATTGGGTTTAGATTTCCCTTTGAACAATAACTA--XXXXXXXXXXTTGCAACTTGACTATGAAATACATTATATTCTAAAGTGTTGTATACAAGGACAAACCTTAAAATTCATTATGATAATATAGAAAACATTGGGAGACTTCT
>Marker270107
AAGAACTAATGGAACAGCTTAAGGAAATGGAAATGAGACCTATTGCATCTGATCATAGGCTCTAGAAACACGTAGCAAAGGTTGAAGATATAGTAAAGAG-XXXXXXXXXXCTTTGATCAAACTGTATAATCCATCTACCATATTTTGGTTGAACTTTCTAGATATAAACTTGTTTGAAAACCAATTTACTCAAATATGGCAATTTACAAG
AAGAACT-ATGGAACAGCTTAAGGAAATGGAAATAAGACCTATTGCATCTGGTCATAGGCTCTAGAAACATGTAGCAAAGGTTGAAGATATAGTAAAGAGAXXXXXXXXXXCTTTGATCAAACTGTATAATCCATCTACCATATTTTGGTTGAACTTTCTAGATATAAACTTGTTTGAAAACCAATTTACTCAATTATGGCAATTTACAAG
* * * *
>Marker255646
GCACATCCTTGCACTTGTTCTTATCTGCCTTGAATGCTTCCTTCAGTCTGCAACATTTTTCAGTATCACCACCTACTCCCCCTAAGAGGTAGACTCCATCXXXXXXXXXXTGGGTTCTTTGAAATGTTGATGGCACTAGTATTATCACATAAGATAGGAATTGGATCCTCATACTCAACATGGATGTCCTTCAAAGTTTGTCTCATCCAT
GCACATCCTTGCACTTGTTCTTATCTACCTTGAATGCTTCCTTCAGTCTGCAACATTTTTCAGTATCACCACCTACTCCCCCTAAGAGGTAGACTCCATCXXXXXXXXXXTGGGTTCTTTGAAATGTTGATGGCACTAGTATTATCACATAAGATAGGAATTGGATCCTCATACTCAACATGGATGTCCTTCAAAGTTTGTCTCATCCAT
*
>Marker306327
ACCATCTGGGGTTATACAAATAAGCATGAATGCATCACAAAGATTGATTTACAATGTAAATAGTTGCAAAAATATGATTTTATAATCTGATGCAGAACTGXXXXXXXXXXAAGAAGCTGAAACCAACCAATTATTCACTGTAACCGTTGGAAAATCACTGAATTCTCAGAGCTGAAAGATACTAACATTTGGAACCCTAGACTCCAAAAT
ACCATCTGGGGTTATACAAATAAGCATGAATGCATCGCAAAGATTGATTTACAATGTAAATAGTTGCAAAAATATGATTTTATAATCTGATCCAGAACTGXXXXXXXXXXAAGAAGCTGAAACCAACCAATTATTCACTGTAACCGTTGGAAAATCACTGAATTCTCAGAGCTGAAAGATACTAACATTTGGAACCCTAGACTCCAAAAT
* *
>Marker170063
AGAGTTTACTCTTATATAGAGTCCAAGCTTGGCTTTAACTCCTTTAATTGGGCTTGATACAAGGCTACCTTCTCCAATACTATTTCATGGCCACTATGTTXXXXXXXXXXATGGCTTGTTTGAGTAAGATTAGTTGTGGTCGTCGACAAGACTAGGGGTCATCTATGTTTGAATTCAAATATTTTTTTTGAAGTTGGAAGCCAGCAACAT
AGAGTTTACTCTTGTATAGAGTCCAAGCTTGGCTTTAACTCCTTTAATTGGGCTTGATACAAGGCTACCTTCTCCAATACTATTTCATGGCCACTATGTTXXXXXXXXXXATGGCTTGTTTGAGTAAGATTAGTTGTGGTCGTCGACAAGACTAGGGGTCATCTATGTTTGAATTCAAATATTTTTTTTGAAGTTGGAAGCCAGCAACAT
*
>Marker436001
ACTATTACAAGACTTACAGTATTCAACCAAGACAAAATAAGGCTTATAGCATACATCTAGGTCAATATAAAGAGGGTGCAACAAGTAAAAACACCAGAATXXXXXXXXXXATCACACCCTTGACACAATTTTCAAAACTTTATGAATTGGTTATCATAGTTACCAAGAGGATAATAGGTTTCTAAGGCGTTAACAAAACTAGAGCAAGCT
ACTATTACAAGACTTACAGTATTCAACCAAGACAAAACAAGGCTTATAGCATACATCTAGGTCAATATAAAGAGGGTGCAACAAGTAAAAACACCAGAATXXXXXXXXXXATCACACCCTTGACACAATTTTCAAAACTTTATGAATTGGTTATCATAGTTACCAAGAGGATAATAGGTTTCTAAGGCGTTAACAAAACTAGAGCAAGCT
*
>Marker404489
GTGATACCATTGAAAGATATACCTTCCAATTCATAGGGCATTCTAGTGAATCAGCCTTTGGGTGGTTCTTCTCCACCTATGTATCACCAACATAGAACT--A----XXXXXXXXXX--TTCTCCCCATTTCTACACACATCTCAAGAGCCATATTCTAATTTAATTACTAAACCTCCAAATCCTTCTAGTTTAGTCATTAAAGGGGTATTAGAATATT
GTGATACCATTGAAAGATATACCTTCCAATTCATAGGGCATTCTAGTGAATCAGCCTTTGGGTGGTTCTTCTCCACC------TCACCAACATAGAACTAAAGGTGXXXXXXXXXXATTTCTCCCCATTTCT--ACACATCTCAAGAGCCATATTCTAATTTAATTACTAAACCTCCAAATCCTTCTAGTTTAGTCATTAAAGGGGTATTAGAATATT
>Marker242301
AAAGACTACTAACCAACTATTAATACAATTGGTAGATAGTGTGACACCTAACTAATATGGAGTGGGCGTAGCTTGCAATCAACCATGTCAAATCCCCTTAXXXXXXXXXXTACCAAGTTGATGATGAAGCCTACAAACAATTGAAGAAACCTACACAAAACTCAGAGGCTACTCCATATAGATCTCCTCATGAAGATCACCATGAAAAAA
AAAGACTACTAACCAACTATTAATACAATTGGTAGATAGTGTGACACCTAACTGATATGGAGTGGGCGTAGCTTGCAATCAACCATGTCAAATCCCCTTAXXXXXXXXXXTACCAAGTTGATGATGAAGCCTACAAACAATTGAAGAAACCTACACAAAACTCAGAGGCTACTCCATATAGATCTCCTCATGAAGATCACCATGAAAAAA
*
>Marker88027
AAGGTAGAGGTAGTTGTCTTTTCTTATGGTTGAGACACCATGAACATCCTAGGTAACATTCCTATTGCATTAGTTGATTCGTTGTCAATGGAATGCATATXXXXXXXXXXCATGAGAACTTCTAGAGGGAATTGGAGAGGTTTGTCTTGCTCTATCCATTCCATGATCTTAATTGTTTTCTCCTTGGGAACAATTTCCTTTAGTTTTGAT
AAGGTAGAGGTAGTTGTCTTTTCTTGTGGTTGAGACACCATGAACATCCTAGGTAACATTCCTATTGCATTAGTTGATTCGTTGTCAATGGAATGCATATXXXXXXXXXXCATGAGAACTTCTAGAGGGAATTGGAGAGGTTTGTCTTGCTCTATCCATTCCATGATCTTAATTGTTTTCTCCTTGGGAACAATTTCCTTTAGTTTTGAT
*
>Marker27428
GCTGGGTCATAATGTCATTTGGCCTGAAGAATGCAGGAGCTACATATTAAACAGCTATGACTATCATCTTCCATGACCTCTTCCACCACATAATGGAAGAXXXXXXXXXXCAGCTAGCTGATAAATGCCAACCATTCCAGCACCTACTCAGAAAAGTTATAGCTTTTGTCTGGAACACTCAGTGTCAGGATGCCTTTGATCAACTAAAAG
GCTGGGTCATAATGTCATTTGGCCTGAAGAATGCAGGAGCTACATATTAAACAGCTATGACTATCATCTTCCATGACCTCTTCCGCCACATAATGGAAGAXXXXXXXXXXCAGCTAGCTGATAAATGCCAACCATTCCAGCACCTACTCAGAAAAGTTATAGCTTTTGTCTGGAACACTCAGTGTCAGGATGCCTTTGATCAACTAAAAG
*
>Marker302314
TGACTTATATGCAAAGAGTTGATAAAATTTTGAAATACAATTGGCTGGAAAGGGAAGAATATAATGTATGGGTGCAGAAGTATATGATGGAATTACCACCXXXXXXXXXXTTATGAGCAGACTGTCTATGTTCTCTTGGATCCAAATATGTGATTTCAAAGGCAAGAGAATAGAGGAACTTTTCCTAGGCTTGGGTGGCTCCAAAAATTA
TGACTTATATGCAAAGAGTTGATAAAATTTTGAAATACAATTGGCTGGAAAGGGAAGAATATAATGTATGGGTGCAGAAGTATGTGATGTAATTACCACCXXXXXXXXXXTTATGAGCAGACTGTCTATGTTCTCTTGGATCCAAATATGTGATTTCAAAGGCAAGAGAATAGAGGAACTTTTCCTAGGCTTGGGTGGCTCCAAAAATTA
* *
>Marker255565
TGATTTGGGGTTATCGTTTTAGGTTTACTCCCACTTGTCAATTTCTTTGTTTTCTTTCTTTTAATTGCTTTATTTATGTTTCATTCAATCAAGGGCCCTTXXXXXXXXXXTACGTGCAAGAACACCTTGACTAAGAAGAAATAAAAGAAAGTGTAATACCATATAAGTAGTTGATTACATTAGTGCGTAAAAAGTATAGATCATAACATT
TGATTTGGGGTTATCGTTTTAGGTTTACTCCCACTTGTCAATTTCTTTGTTTTCTTTCTTTTAATTGCTTTATTTATGTTTCATTCAATCAAGGGCCCTTXXXXXXXXXXTACGTGCAAGAACACCTCGACTAAGAAGAAATAAAAGAAAGTGTAATACCATATAAGTAGTTGATTACATTAGTGCGTAAAAAGTATAGATCATAACATT
*
>Marker157109
TATGTTTCAGGTTTTTCTAAGGTGATAACAATTGATAACACTTTGGCCAAGATTCAAGACATCTCTTGACTAATGAAGGACAATCTAAAACTGGAGCAAAXXXXXXXXXXATAGAGCTACCTGCATTGGATGAGGAGGGATCCATATTTTTAGAACTTGAGTTTATTTTGGACAAACACATCAAGCACCTTCATAATCATTCTATTGAGG
TATGTTTCAGGTTTTTCTAAGGTGATAACAATTGATAACACTTTGGCCAAGATTCAAGACATCTCTTGACTAATGAAGGACAATCTAAAAATGGAGCAAAXXXXXXXXXXATAGAGCTACCTGCATTGGATGAGGAGGGATCCATATTTTTAGAACTTGAGTTTATTTTGGACAAACACATCAAGCACCTTCATAATCATTCTATTGAGG
*
>Marker160301
AGCGCCTTAACGCACCCTCTCATATTGGGTGAGTGGCGTAGAATAGATTAACGTTCAAGCTCATGGAGGACTCTCCCGAGGTAAACCATGGAACCTCTATXXXXXXXXXXTTCCTAGAAGGGGGCATTACAAATGGTATCAGAGCTCTCGTCCTGCCATCTTGTGAAGCAATTTTATGCAAGCGTATACGAGGACTCACAACAACTTAGA
AGCGCCTTAACGCACCCTCTCATATTGGGTGAGTGGCGTAGAATAGATTAACGTTCAAGCTCATGGAGGACTCTCCCGAGGTAAACCATGGAACCTCTATXXXXXXXXXXTTACTAGAAGGGGGCATTACAAATGGTATCAGAGCTCTCGTCCTGCCATCTTGTGAAGCAATTTTATGCAAGCGTATACGAGGACTCACAACAACTTAGA
*
>Marker47952
TGAATACCAATCATTAATGACATAGATTGAAGTTATCATAACAGTCATGAAAGGATGAGCCATGATGGATAGTCAAATCTCAAGTGCATGGAGTAGTCAAXXXXXXXXXXTAGCCTATCACAAGATAATAGGTGTGAGGTCTCATAACAGGAATGACAAGAAACAGTCAATGGTTTCCAAAGGGTGATTAAATCTCAAGCAAGGGCAGCG
TGAATACCAATCATTAATGACATAGATTGAAGTTATCATAACAGTCATGAAAGGATGAGCCATGATGGATAGTCAAATCTCAAGTGCATGGAGTAGTCAAXXXXXXXXXXTAGCCTATCACAAGATAATAGGTGTGAGGTCTCATAACAGGAATGACAAGAAACAGTCAATGGTTTCCAAAGGGTGATTAAATCTCAAGCAAGGGTAGCG
*
>Marker389150
GGACAAGACACATAGGCTATTTGGTCTTAGGTAAGGGGGTATTCTATCCATAACCCTTACAAATCTTGTATTGAAATCAAATACAAATTCATTTGAGCCTXXXXXXXXXXCTTCTGATATAGCATATTGTTTGGAACTTCATTAGTTTTGATCTTACTTCAGCAAGCATTGGGTTAGGGTATCCAAGTATTCTGGTGAAATCCAATTATC
GGACAAGACACATAGGCTATTTGGTCTTAGGTAAGGGGGTATTCTATCCATAACCCATACAAATCTTGTATTGAAATCAAATACAAATTCATTTGAGCCTXXXXXXXXXXCTTCTGATATAGCATATTGTTTGGAACTTCATTAGTTTTGATCTTACTTCAGCAAGCATTGGGTTAGGGTATCCAAGTATTCTGGTGAAATCCAATTATC
*
>Marker92047
CCTTGGAGTATTGCTTTATGATCCACATTGCCTGCCCTCAGACTGGAAGTTGTAGGATGCGATACACATCCTCATGTGTAATCATCATCTCTCCTGTAGGXXXXXXXXXXCTATTCAATCCTAGCAATAAAATTATGCCTTGTCCCTTGGGCCCATGTCCTCTCTGGACTTGGACGCCCTAGGAGGACCTGGGTGCCCTAGCTAGACTTG
CCTTGGAGTATTTCTTTATGATCCACATTGCCTGCCCTCAGACTGGAAGTTGTAGGATGCGATACACATCCTCATGTGTAATCATCATCTCTCCTGTAGGXXXXXXXXXXCTATTCAATCCTAGCAATAAAATTATGCCTTGTCCCTTGGGCCCATGTCCTCTCTGGACTTGGACGCCCTAGGAAGACCTGGGTGCCCTAGCTAGACTTG
* *
>Marker314117
TAAGAGCAACTTATGATTAATGTATTTAAATTTTTATCATGGGACTAATGATGTTGGCAAGTTGTTGAATATATAGGGCTTTGTGTATTCAAATTGGGCTXXXXXXXXXXGAAAAGAACCTAATGTAGCATACTTTTACTAAGTGTTTTGATGTCCAATATCATCTTTTTCAATAGAGTAAAGTTTAAGAAGATTCATATGGAGAAATTT
TAAGAGCAACTTATGATTAATGTATTTAAATTTTTATCATGGGACTAATGATGTTGGCAAGTTGTTGAATATATAGGGCTTTGTGTATTCAAATTGGGCTXXXXXXXXXXGAAAAGAACCTAATGTAGCATACTTTTACTAAGTGTTTTGATGTCCAATATCATCTTTTTCAAGAGAGTAAAGTTTAAGAAGATTCATATGGAGAAATTT
*
>Marker269047
ATTGCATTTATTTTTAATTGTATGCACCTTCATGGGAGCCTTGTTTGAGTTACTCTCACTCTCGCTTGTCACCTTTAGCAATTGTTTGTAAGAATTACAAXXXXXXXXXXCACTTATTCATGTTCCATTTGCAACTAGGTAACTTTATAAGGATGTTTTCTTATTTTTCCAACCTAGCTTTTCTACCATTTTCTCTAAGACCAAGTTATC
ATTGCATTTATTTTTAATTGTATGCACCTTCATGGGAGCCTTGTTTGAGTTACTCTCACTCTCGCTTGTCACCTTTAGCAATTGTTTGTAAGAATTACAAXXXXXXXXXXCACTAATTCATGTTCCATTTGCAACTAGGTAACTTTATAAGGATGTTTTCTTATTTTTCCAACCTAGCTTTTCTACCATTTTCTCTAAGACCAAGTTATC
*
>Marker190482
TTGCTATGTGAGTGACTAAGGCTAACATGCAAGCTTGTGCAATACCATGTAGATCATGATGTGAACAAAAAAAACTTGCTTTCCATTTATCCATTTAACC-XXXXXXXXXXTCATGAAGGTGACCCTGCATAAGGGAGCTAGGTAAGTCATCATGACAAGGTTAGTTTGTCAAAGTTAATATTTCATATTAATAACCTCATGGTTGGAAAG
TTGCTATGTGAGTGACTAAGGCTAACATGCAAGCTTGTGCAATAGCATGTAGATCATGATGTGAAC-AAAAAAACTTGCTTTCCATTTATCCATTTAACCAXXXXXXXXXXTCATGAAGGTGACCCTGCATAAGGGAGCTAGGTAAGTCATCATGACGAGGTTAGTTTGTCAAAGTTAATATTTCATATTAATAACCTCATGGTTGGAAAG
* *
>Marker207098
TAAGGTAAATCTTCTCAAGATTTTTAGGCATTTCATGATAAGAAGTAAATGATATGGGAGAATTGACATTGAAATATGCCATGATTGGACCTTAGGATGGXXXXXXXXXXAAAAATATCACCTGAATTGGACCTAGACCTGGTCACTCAACCACTATTATGAGCCATATTTACACAAATCTTACCTTAATTCCAATCAGGCCCTCCTTCT
TAAGGTAAATCTTCTCAAGATTTTTAGGCATTTCATGATAAGAAGTAAATGATATGGGAGAATTGACATTGAAATATGCCATGATTGGACCTTAGGATGGXXXXXXXXXXAAAAATATCACCTGAATTCGACCTAGACCTGGTCACTCAACCACTATTATGAGCCATATTTACACAAATCTTACCTTAATTCCAATCAGGCCCTCCTTCT
TAAGGTAAATCTTCTCAAGATTTTTAGGCATTTCATGATAAGAAGTAAATGATATGGGAGAATTGACATTGAAATATGCCATGATTGGACCTTAGGATGGXXXXXXXXXXAAAAATATCACCTGAATTGGACCTAGACCTGGTCACTCAACCACTATTATGAGCCATATTTACACAAATCTTACCTTAATTCCAATCAAGCCCTCCTTCT
* *
>Marker428338
CTTTGACAAGCTTAGTTTAATTATTCAACTTATTTTCCCTTTACCAACACCCAATAGCCTACGGAAAAACTTAGGAAAGTAGGCTAAGGGTCACCAACAAXXXXXXXXXXCATATGGACATCTGCCAAAGCATAAAGGATAGAGGAATTTCATTATTTTATTTTGTAGTTGTGACTGCCCTGGTAGACATGTGTGCAAAATGTAGAAGCA
CTTTGACAAGCTTAATTTAATTATTCAACTTATTTTCCCTTTACCAACACCCAATAGCCTACGGAAAAACTTAGGAAAGTAGGCTAAGGGTCACCAACAAXXXXXXXXXXCATATGGACATCTGCCAAAGCATAAAGGATAGAGGAATTTCATTATTTTATTTTGTAGTTGTGACTGCCCTGGTAGACATGTGTGCAAAATGTAGAAGCA
*
>Marker230391
AGAAATCAATGAAAACTACTCAAGATTTACAATATAACAATAGTTTGCAACTTCATTTTCATTATATATGTAGAGGATATACAAATATACATTGATATGAXXXXXXXXXXGTATTCTCCAGCATCTTTACCTTTGCATCTTCATAAATATTCTATTCCTCGGCATCCAATGAGTCTTCACCTACCATCATTCCTCCAAAGTCTAAATTCT
AGAAATCAATGAAAACTACTCAAGATTTACAATATAATAATAGTTTGCAACTTCATTTTCATTATATATGTAGAGGATATACAAATATACATTGATATGAXXXXXXXXXXGTATTCTCTAGCATCTTTACCTTTGCATCTTCATAAATATTCTATTCCTCGGCATCCAATGAGTCTTCACCTACCATCATTCCTCCAAAGTCTAAATTCT
* *
>Marker128890
TGGTTTTCTGGTGTTTATGTGAAAGACCTAACAAAACCATGTGTTAGGTGATGTCTAGAAGCATAGGAAAAGAGTAAAAGAGGACCAATCAGTTGCAGTCXXXXXXXXXXCCTGATTGTCCAAGATCTATATTTGAAGGTCTGTAACAAAAGTTATTGATGATTGTTCTCTTTTATAGGGCTATAAGCAATATCTTGGGTTTTTTAAGGA
TGATTTTCTGGTGTTTATGTGAAAGACCTAACAAAACCATGTGTTAGGTGATGTCTAGAAGCATAGGAAAAGAGCAAAAGAGGACCAATCAGTTGCAGTCXXXXXXXXXXCCTGATTGTCCAAGATCTATATTTGAAGGTCTGTAACAAAAGTTATTGATGATTGTTCTCTTTTATAGGGCTATAAGCAATATCTTGGGTTTTTTAAGGA
* *
>Marker160215
TACTATTTGATGAAGTGTATTTCATGCTCCTGTAGAAAGAAACCTCTATAATTTCATTGTTTGAAAACCCTCTTTCATATCTACCTTCTATGGCTGCCATXXXXXXXXXXTTTTCAATGGCTTAGACTGCTCCATTCATTATGCTGGTAGACTATTCTTTCTACCTTATAATAGTCTAATCACTGTTCTCTTCAAGTGATTCAAAATGAT
TACTATTTGATGAAGTGTATTTCATGCTCCTATAGAAAGAAACCTCTATAATTTCATTGTTTGAAAACCCTCTTTCATATCTACCTTCTATGGCTGCCATXXXXXXXXXXTTTTCAATGGCTTAGACTGCTCCATTCATTATGCTGGTAGACTATTCTTTCTGCCTTATAATAGTCTAATCACTGTTCTCTTCAAGTGATTCAAAATGAT
* *
>Marker634474
AACCATAACATACTTCAAACTTTCAACTGCACTCTAGTAAGGCACTCTACTCATATATTCTATCTTTGATGGGAATGTTGGACATTGTGAAGCAAATAACXXXXXXXXXXTGCAATAAACAAGAACAATCACCATCAATTTTATAATAAACATAGTGATCTGATTTAGAGCGTTCAAATCCCAAACTAAACACATATGTATCAAATTTAT
AACCATAACATACTTCAAACTTTCAACTGCACTCTAGTAAGGCACTCTACTCATATATTCTATCTTTGATGGGAATGTTGGACATTGTGAAGCAAATAACXXXXXXXXXXTGCAATAAACAAGAACAATCACCATCAATTTTATAATAAACATAGTGATCTAATTTAGAGCGTTCAAATCCCAAACTAAACACATATGTATCAAATTTAT
*
>Marker161253
ATCACTGAAAGCTTCTGAAAATCAAACACATAAGCATCAATTGTATGCTTTTGTTTCAGTTGGGCCAACTCTCTGAAGTGAAATTCAGGGTCTTTCTTATXXXXXXXXXXCAACAACAACATTAGAATAAAACACCAAGTGCTCTATCCTCTCTTGAACAAAGCGTCTCGAATGCTAAACGTGATCAAACAAGAACACTCCAAGCTTCCT
ATCACTGAAAGCTTCTGAAAATCAAACACATAAGCATCAATTGTATGATTTTGTTTCAGTTGGGCCAACTCTCTGAAGTGAAATTCAGGATCTTTCTTATXXXXXXXXXXCAACAACAACATTAGAATAAAACACCAAGTGCTCTATCCTCTCTTGAACAAAGCGTCTCGAATGCTAAACGTGATCAAACAAGAACACTCCAAGCTTCCT
* *
>Marker394614
TTAGAGATGACTCTCACCTAAACATTGTTGGCCATGGATGAGTCTAGATTCAATTCCCTAATGGATGTGTGAAGGGGATCAATGGTGTATTGCATATCCTXXXXXXXXXXTTGATGGTCATTCTTTCTAGGTATCTGTTGGTAAATAAATTTGTCACTGCAGTTATTGCCTTAAAAAATAGCCCCGACTCACATAATGGGCAGCAAGAAA
TTAGAGATGACTCTCACCTAAACATTGTTGGCCATGGATGAGTCTAGATTCAATTCCCTAATGGATGTGTGAAGGGGATCAATGGTGTATTGCATATCCTXXXXXXXXXXTTGATGGTCATTCTTTCTAGGTATCTGTTGGTAAATAAATTTGTCACTGCAGTTATTGCCTTAAAAAATAGCCTCGACTCACATAATGGGCAGCAAGAAA
*
>Marker208422
ATTCTTTTTAAGAAGATGGGAGAATGACTAACACTTGTCAGCAAGCTATGCAACAAACCTTCTAATAGTAAGAAGTTTCCCCTGGAGGCTACAAAGTTACXXXXXXXXXXTAATCTTCCATAATTCCATGGAGCATGATAGGAAAGATAACTATCATAGCTCTCTAATATGTATCCCCTACGTTCTTCAACCCAAAAGGCATTACCTAAT
ATTCTTTTTAAGAAGATGGGAGAATGACTAACACTTATTAGCAAGCTATGCAAAAAACCTTCTAATAGTAAGAAGTTTCCCCTGGAGGCTACAAAGTTACXXXXXXXXXXTAATCTTCCATAATTCCATGGAGCATGATAGGAAAGATAACTATCATAGCTCTCTAATATGTATCCCCTACGTTCTTCAACCCAAAAGGCATTACCTAAT
* * *
>Marker323686
TTAAAGCATGATGCATAATTTTTTATGCTTATGAAGCTTATTAGAGCCTAAATGTTACCTTAAACTAACACATTTTGATCTTGACATACCATGTCAACCAXXXXXXXXXXAGCCTAATCAAGAAGAGTTGTTAAGATAATCAAATGCAAGAAATTAATTATAAAATGAGCTTGCACGCAAGTGAACCAAGTTAATCCACCCAAGTTTGAT
TTAAAGCATGATGCATAATTTTTTATGCTTATGAAGCTTATTAGAGCCTAAATGTTACCTTAAACTAACACATTTTGATCTTGACATACCATGTCAACCAXXXXXXXXXXAGCCTAATCAAGAAGAGTTGTTAAGATAATCAAATGCAAGAAATCAATTATAAAATGAGCTTGCACGCAAGTGAACCAAGTTAATCCACCCAAGTTTGAT
*
>Marker149701
TTGATGAATGAAATTTATTATCATTTAAAGTGTGAACATTTGTATGTTACACGATTGAGTGTTTGATTTCAATTTAAGTTGCTTCAACTATATATATGTTXXXXXXXXXXTCCTTGTTGTCCAATTTAGGATTTGTGAATTAGGGGATTTTTAAAAGGTGTTAAATGGTCTATTTCTTGGTTATTTTATTGCTTTTAAGGCCTTAGACTA
TTGATGAATGAAATTTATTATCATTTAAAGTGTGAACATTTGTATGTTACACGATTGAGTGTTTGATTTCAATTTAAGTTGTTTCAACTATATATATGTTXXXXXXXXXXTCCTTGTTGTCCAATTTAGGATTTGTGAATTAGGGGATTTTTAAAAGGTGTTAAATGGTCTATTTCTTGGTTATTTTATTGCTTTTAAGGCCTTAGACTA
*
>Marker172999
AGTTCTTTATCTTCTCATGATGAGGTTGATGACTCTTTAATTCATTATGATTTGGTTTACGTTACACATCTTTCCAGAGCACAAATGTTGGAGTCATTTAXXXXXXXXXXATTTTATTCATCATGACGATATGCCCATTGTGAATTTCCACGGAGATCCTCTTTTGGATCCTTTCATGTTTTCATATGATGTATCTTTGAGAAATTTTTG
AGTTCTTTATCTTCTCATGATGAGGTTGATGACTCTTTAATTCATTATGATTTGGTTTATGTTACACATCTTTCTAGAGCACAAATGTTGGAGTCATTTAXXXXXXXXXXTTTTTATTCATCATGACGATATGCCCATTGTGAATTTCCACGGAGATCCTCTTTTGGATCCTTTCATGTTTTCATATGATGTATCTTTGAGAAATTTTTG
* * *
>Marker127239
CCACCAAGAAATCCCACATCCCAACATCCCCATCCTCAACATCCCAGGTTCAATTGGGTCCCTAAATCCCAAAATTAGCAATTCCAAAATCCCCCATCCTXXXXXXXXXXCCTTTAATCCACACTTTTGCTTAATCCCATCCATCCTCCATCCACCCTTCCTTCCATCCCATTAGCCTTGGCAGTATCCTCTACACATCAAAGCTATGAT
CCACCAAGAAATCCCACATCCCAACATCCCCATCCTCAACATCCCAAGTTCAATTGGGTCCCTAAATCCCAAAATTAGCAATTCCAAAATCCCCCATCCTXXXXXXXXXXCCTTTAATCCACACTTTTGCTTAATCCCATCCATCCTCCATCCACCCTTCCTTCCATCCCATTAGCCTTGGCAGTATCCTCTACACATCAAAGCTATGAT
*
>Marker288296
GTCGGGGGCTTGATTATCTTGCACTGCATATTGTAAAACTGGACGGTTTACTGCCAATTCATATAGCATTTCATATCTCAACCCGTTTTGACATGAACAAXXXXXXXXXXTATAAATTTCAGAATTGAATATATAGTTGTTACTTGCCATTTACTTATAATTCATGATCAAATATGTTTGGCAAATCATATTGTTGCAACCCCGGATGGT
GTCGGGGGCTTGATTATCTTGCACTGCATATTGTAAAACTGGACGGTTTACTGCCAATTCATATAGCATTTCATATCTCAACCCATTTTGACATGAACAAXXXXXXXXXXTATAAATTTCAGAATTGAATATATAGTTGTTACTTGCCATTTACTTATAATTCATGATCAAATATGTTTGGCAAATCATATTGTTGCAACCCCGGATGGT
*
>Marker303775
ATTCAAAGGCAAAAAAAACCATTCTATGTTCCCAGTTCAAGTTGCTTAAAACTTGATTTATTTAAATTGTGATACATCCATAAGCATTGAGTCTATCTGAXXXXXXXXXXAAACGATGAAAGCTTGTCACTCTGAGAAGAGTATATGAGCACACTCCATGGCTGAAAATTGAAATCACTCGAGTCTGAAGATTTTCTGCACATTTGTTTT
ATTCAAAGGCAAAAAAAACCATTCTATGTTCCCAGTTCAAGTTGCTTAAAACTTGATTTATTTAAATTGTGATACATCCACAAGCATTGAGTCTATCTGAXXXXXXXXXXAAACGACGAAAGCTTGTCACTCTGAGAAGAGTATATGAGCACACTCCCTGGCTGAAAATTGAAATCACTCGAGTCTGAAGATTTTCTGCACATTTGTTTT
* * *
>Marker61593
GTTATTGGCATGTTTAAGGCTTGTTGCCCTGGGGGCTATTTTGTATAGGGTTCTAGACCCTCTTTTCCAGTTGAACTAATAAAAAACTATTCAAAGTTGTXXXXXXXXXXCTCTACATAAATTTTCCATGTAAGAACCCCCCAATTTGGGAGTAAAAACCTATCTTGTAGGCGCCAATATCTTTCTATAATATTATATTATTAATTGCAT
GTTATTGGCATGTTTAAGGCCTGTTGCCCTGGGGGCTATTTTGTATAGGGTTCTAGACCCTCTTTTCCAGTTGAACTAATAAAAAACTATTCAAAGTTGTXXXXXXXXXXCTCTACATAAATTTTCCATGTAAGAACCCCCCAATTTGGGAGTAAAAACCTATCTTGTAGGCGCCAATATCTTTCTATAATATTATATTATTAATTGCAT
*
>Marker50902
AAGAAAAGAGAGAATCTCCCCCCTTCCTGCTGACCCTTAGGATATTTGGCAAGAACCTTCACAACTGCTTGGTTGACTCAGGGGTTTCCACTAATGTCATXXXXXXXXXXTACATGGCTACTGACTTCTCTCATATGTGATTACCATAGAAAGGACTTTTTAATCAAATTTGCATTGAGAGGGAGCCCAAGATCAAGCACATGATAACAG
AAGAAAAGAGAGAATCTCCCCCCTTCCTGCTGACCCTTAGGATATTTGGCAAGAACCTTCACAACTGCTTGGTTGACTCAGGGGTTTCCACTATTGTCATXXXXXXXXXXTACATGGCTACTGACTTCTCTCATATGTGGTTACCATAGAAAGGACTTTTTAATCAAATTTGCATTGAGAGGGAGCCCAAGATCAAGCACATGATAACAG
* *
>Marker382939
GCAAGCCATGAATAGTGAATCTGAGTGTAAGACTATCAAGCTTGGTAAGGTTCAAAAACTAAGTTATTCATTTGCTATGAACACAAACGTATGAAAAATGXXXXXXXXXXTATAGGACAATTATAATCTTCGATCTAGATGTTACCTATACATACCATCAAATAATTGGTCATCCTTGATTCTTGTTTAAAGAATAAGAACAATAGATCA
GCAAGCCATGAATAGTAAATCTGAGTGTAAGACTATCAAGCTTGGTAAGGTTCAAAAACTAAGTTATTCATTTGCTATGAACACAAACGTATGAAAAATGXXXXXXXXXXTATAGGACAATTATAATCTTCGATCTAGATGTTACCTATACATACCATCAAATAATTGGTCATCCTTGATTCTTGTTTAAAGAATAAGAACAATAGATCA
*
>Marker430283
AAGCTCTAAAACAATGATTTAACATTCAGAAATGTAGAAACAAGGGTATCTTTTATTGATATCACATCAAAATGTAACAACCCACATTTTCCAACCTTCTXXXXXXXXXXCCTTATTACAACATCAAGACACCCAACCAAAGAAAATTTTACAAAAATGGCCTCATGGAGGCATGTAGTCAAACAGATGCTCCTGCACCAACACGTGATT
AAGCTCTAAAACAATGATTTAACATTCAGAAATGTAGAAACAAGGGTATCTTTTATTGATATCACATCAAAATGTAACAACCCACATTTTCCAACCTTCTXXXXXXXXXXCCTTATTACAACATCAAGACACCCAACCAAAGAAAATTTTACAAAAATGGCCTCATGGAGGCATGTAGTCAAACATATGCTCCTGCACCAACACGTGATT
*
>Marker248307
AATTTAGTTATTCCATCAATCTATGGGTAATATGCTAAGATAAAATTTAAACCTATATTCATCTTCAAGAGGTTCTCCAAAAATATCCCACAAACTTAGTXXXXXXXXXXGGAAGTATTGTCCATCAAGGTTGATAAAGTTTGTGTTGGTATCACATTGGTTGGTGTCACGTTCATCATTGATATCAGTGTGGAGTTCGTAGGTTGGGTT
AATTTAGTTATTCCATCAATCTATGGGTAATATGCTAAGATAAAATTTAAACCTATATTCATCTTCAAGAGGTTCTCCAAAAATATCCCACAAACTTAGTXXXXXXXXXXGGAAGTATTGTCCATCAAGGTTGATAAATTTTGTGTTGGTATCACATTGGTTGGTGTCACGTTCATCATTGATATCAGTGTGGAGTTCTTAGGTTGGGTT
* *
>Marker344397
ACCTTTACACCTCATAAGTCATCTCCTTCCACTTCCAAGCTAGTTGTTGTTGGAAATATGTGTTGTCATTGATGTCAAATCTATATGTGTCAACTTGAGGXXXXXXXXXXGGAAAGTAGACCTATTCTAATATGTCTTCTATATGTCTACATTGATATCCTATTAGTTTAAGGTATCGCACTTAAAGACAAGTTGCAGAAGTTTGGCTAA
ACCTTTACACCTCATAAGTCATCTCCTTCCACTTCCAAGCTAGTTGTTGTTGGAAATATGTGTTGTCATTGATGTCAAATCTATATGTGTCAACTTGAGGXXXXXXXXXXGGAAAGTAGACCTATTCTAATATGTCTTCTATATGTCTACATTGATATCCTATTAGTTTAAGGTATCGCACTTAAAGATAAGTTGCAGAAGTTTGGCTAA
*
>Marker179456
TGAATTATCAGCTATACACACTAAATCATCTTTCATGTTACATTTGAAAATCTTCCTACTCGAACGAATGTCTTTTAGGATTCTCTTCTCCCTTATTGAAXXXXXXXXXXTCTGTTATTTGTGATAAAATTCCACATACTAAAGCCTTTGTGTGGGTCTTTCATTGTATAGATTCTTTCCTTGTCTCTAGAGTCTAGATATTCAGTTTTG
TGAATTATCAGCTATACACACTAAATCATCTTTCATGTTACATTTGAAAATCTTCCTACTCGAACGAATGTCTTTTAGGATTCTCTTCTCCCTTATTGAAXXXXXXXXXXTCTGTTATTTGTGATAAAATTCCACATACTAAAGCCTTTGTGTGGGTCTTTCATTGTATAGATTCTTTCCTTGTCTCTAGAGTCTAGATATTCGGTTTTG
*
>Marker171782
AAAGGAAAGACATTATGAATATTACCTCAAAAAAGGATACTATAGAGGCTGCAGAGAGTTTTTTAAGTGAAGGGATCAAGCCCCTAGATTGAGAACCTACXXXXXXXXXXGTATGGTTGTAGGGCTAGCACACTACGAGAGCTAGGAACCATACCAAACTCTTATGGGTCACAAGGACTAAAAAACTGCGTTGTGAGGTGACTCACAAAG
AAAGGAAAGACGTTATGAATATTACCTCAAAAAAGGATACTATAGAGGCTGCAGAGAGTTTTTTAAGTGAAGGGATCAAGCCCCTAGATTGAGAACCTACXXXXXXXXXXGTATGGTTGTAGGGCTAGCACACTACGAGAGCTAGGAACCATACCAAACTCTTATGGGTCACAAGGACTAAAAAACTGCGTTGTGAGGTGACTCACAAAG
*
>Marker233349
ATGCGGACCTAAAAAAGTTAATGGATGGAAAATTAGAACTATTGCAAGTATGTGCCTAACTAGTGTTATCATTGATGTCAACATATCTGTGTTGTCATTGXXXXXXXXXXGTATAATTGGTGATGACAGGGAGAATGTATTATGCTCTGCATTCCTCTGCATTTAAGTATTTTAGTCTGTGGTTCTAGAATCAAGTTTGTAATGATGATA
ATGCGGACCTAAAAAAGTTAATGGATGGAAAATTAGAACTATTGCAAGTATGTGCCTAACTAGTGTTATCATTGATGTCAACATATCTGTGTTGTCATTGXXXXXXXXXXGTATAATTGGTGATGACAGGGAGAATGTATTATGCTCTGCATTCCTCTACATTTAAGTATTTCAGTCTGCGGTTCTAGAATCAAGTTTGTAATGATGATA
* * *
>Marker195940
GTGAGCTTCAGAGTATATGATCGAGAATTATACCCTTTCGCAGTCACTAGACAATGATAGGTAGATTTTCAATGGAGTGTGGAAAGCTAATCTAATCCTAXXXXXXXXXXCACATAATCCAAAACCCTCATTCGCTTACCACACTTAAGATTTATCAAATTAAGCACAACATCCACTAATTCAAAATCATATGTAAGGAAAAGAAACACA
GTGAGCTTCAGAGTATATGATCGAGAATTATACCCTTTCGCAGTCACTAGACAATGATAGGTAGATTTTCAACGAAGTGTGGAAAGCTAATCTAATCCTAXXXXXXXXXXCACATAATCCAAAACCCTCATTCGCTTACCACACTTAAGATTTATCAAATTAAGCACAACATCCACTAATTCAAAATCATATGTAAGGAAAAGAAACACA
* *
>Marker52474
CCATCATCAAGTGCATCGCTTTCTGTATCCTCATCATCCTGATGACCTCGACCCTATATATGAGCTTGCATGACTACCTTGACATTCTCATACAACTGCAXXXXXXXXXXTTCCACCTTTCCTTCCAACGTTTCCAGAATTTCTGCCTCAAAAGACATCATATCATGTAACTTCATACTGATTTCTCTCAACTTATTGTTGCATCTTTTA
CCATCATCAAGTGCATCGCTTTCTGTATCCTCATCATCCTGATGACCTCGACCCTATATATGAGCTTGCATGACTACCTTGACATTCTCATACAACTACAXXXXXXXXXXTTCCACCTTTCCTTCCAACGTTTCCAGAATTTCTGCCTCAAAAGACATCATATCATGTAACTTCATACTGATTTCTCTCAACTTATTGTTGCATCTTTTA
*
>Marker278973
TTTTTCGTGGAGGATAACTCCCTTAAGAAAACAAGAGGAAGGTGCTAGTAAATATATGGAGGGGTCTTTGGGGAGGGCACTGAATCCATATTTCCTATTGXXXXXXXXXXTGTTTGTGAACTAAGTGCTAGAAAAATAATAAAAATTGCAAAGAAATTAAATCCATGCAATGGCTATGTTTGGTTATGATGTCTTGATGACATGATGAGT
TTTTTCGTGGAGGATAACTCCCTTAAGAAAACAAGAGGAAGGTGCTAGTAAATGTATGGAGGGGTCTTTGGGGAGGGCACTGAATCCATATTTCCTATTGXXXXXXXXXXTGTTTGTGAACTAAGTGCTAGAAAAATAATAAAAATTTCAAAGAAATTAAATCCATGCAATGGCTATGTTTGGTTATGATGTCTTGATGACGTGATGACT
* * * *
>Marker58349
ACGTAACTCACAACCCCTAGTTAACTTTGAAGCATCATCTTGTATCTTAGGCCATAGGCCAACAGACATAACTTTGCAAATTTGATCATTTATTGGCAACXXXXXXXXXXAACATATCAGCCAACTTATTAATAACACCTTTCTAGCATTTAAAGACCAGATAAAATTAAGGAAACCCATCCATTTATGATGTTGTTCTTGTAATTTAAT
ACGTAACTCACAACCCCCAGTTAACTTTGAAGCATCATCTTGTATCTTAGGCCATAGGCCAACAGACATAACTTTGCAAATTTGATCATTTATTGGCAACXXXXXXXXXXAACATATCAGCCAACTTATTAATAACACCTTTCTAGCATTTAAAGACCAGATAAAATTAAGGAAACCCATCCATTTATGATGTTGTTCTTGTAATTTAAT
*
>Marker52301
CTTAGTGCATTTTGTGAGTTTTGTGAGCTTGGGACAGTCAAACGTAGTTAGTCTAGGGTCCCTAGAAGGTTTGGGAAGGTCCCCATATGTTTGAACCTATXXXXXXXXXXATTGCATGATTAAGAGGATTTGGATAGTGACAAAGAAGTCCAACATATAATAGGAACTCAAGAGCTAAAATTTTGAAGCTGAGATTCCAAAGTTGGATGT
CTCAGTGCATTTTGTGAGTTTTGTGAGCTTGGGATAGTCAAACCTAGTTAGTCTAGGGTCCCTAGAAGGTTTGGGAATGTCCCCATATGTTTGAACCTATXXXXXXXXXXATTGCATGATTAAGAGGATTTGGATAGTGACAAAGAAGTCCAACATATAATAGGAACTCAAGAGCTAAAATTTTGAAGTTGAGATTCCAAAGTTGGATGT
* * * * *
>Marker154722
TTTATTCTATGTTTGTTTGTGACTAACATCATGACCAACAGAACTCCTGACTCAATTATTTCAGATAATGCTTTAGCATTTATTAGATTAAGAATATCTAXXXXXXXXXXTAAAAGAGCTAGAGTTACTTGAAGAACAACTAATGGAAGTCAAGCTTGCACAGCTGATTAAACTTGAAGAAATCAACAAAGAGACCTTGAAAACATTAGA
TTTATTCTATGTTTGTTTGTGACTAACATCATGACCAACAGAACTCCTGACTCAATTATTTCAGATAATGCTTTAGCATTTATTAGATTAAGAATATCTAXXXXXXXXXXTAAAAGAGCTAGAGTTACTTGAAGAACAACTAATGGAAGTCAGGCTTGCACAACTGATTAAACTTGAAGAAATCAACAAAGAGACCTTGAAAACATTAGA
* *
>Marker195889
CTGCCCATGTCCTCCACCTCACTAGGAGATTTTGGACAATCACTAATAGACAACTTTGTCCCCAATCAACAACATATCATCAACATACAATGCAATAAT--G-XXXXXXXXXXTCTAAGTCATAAGTAGCTGCAAGATATAACAAGAACCGAATGGATGTCAGCTTTGCAATGGGAGAGAAAATTTCACCATAATCAATTCCCTCCACTTGTG
CTGCCCATG---TCCACCTCACTAGGAGATTTTGGACAATCACTAATAGACAACTTTGTCCCCAATCAACAACATATCGTCAACATACAATGCAATAATGAGAXXXXXXXXXXTCTAAGTCATAAGCAGCTGCAAGATATAACAAGAACTGAATGGATGTCAGCTTTGCAATGGGAGAGAAAATTTCACCATAATCAATTCCCTCCACTTGTG
* * *
>Marker357921
ATTTCTGCACTTTTCAGATTGTTGGTTGAACCTCCATCTATGATTACCTTGCATACTTTGCCCTTCCACTAGCATTTTGTTCAAAACACTCTTCCTTCTTXXXXXXXXXXCTACCTTTGAAGCCTCTCTTCCTTTAGAGTCTGGCTTCACTTCCCAGTTCTCATATTCTTCATTCTTGGCAGTTTTTC---AAGTTCCTTTTCCTCTAAAGGA
ATTTCTGCACTTTTCAGATTGTTGGTTGAACCTCCATCTATGATTACCTTGCATACTTTGCCCTTCCACTAGCATTTTGTTCAAAACACTCTTCCTTCTTXXXXXXXXXX---CCTTTGAAGCCTCTCTTCCTTTAGAGTCTGGCTTCACTTCCCAGTTCTCATATTCTTCATTCTTGGCAGTTTTTCAAGAAGTTCCTTTTCCTCTAAAGGA
>Marker202191
CAATTTATCATAGAAAAATGGAAGAAATTGGATCTTTACAATGAGAATATTGTGAATTTTTATGACATGCAAGAACATAGTCAAAGATAAAATGCAAACAXXXXXXXXXXGTGGCTATGAATAGCATAGGAGGGTTCTAACAAGAAATTTAGACTAAGTGGAGGTGGTTCATGGAAAAATGCGAATAAAATTTTATTGCTTGAAAAAGTT
CAATTTATCATAGAAAAATGGAAGAAATTGGATCTTTACAATGAGAATATTGTGAATTTTTATGACATGCAAGAACATAGTCAAAGATAAAATGCAAACAXXXXXXXXXXGTGGCTATGAATAGCATAGGAGGGTTCTAACAAGAAATTTAGACTAAGTGGAGGTAGTTCATGGAAACATGCGAATAAAATTTTATTGCTTGAAAAAGTT
* *
>Marker297981
CAAGTCGGCTCACCACAATCCCAAATATGAGAGGTTAATGCATCAACAAGTCTCAACAAGGTAAGATTCTAATAAAGCCATTTTAAAGTGTATATAAATCXXXXXXXXXXTATTTTAAAAAGGTTCCAAAGGGTTTAACATCCAAAGGGATAGGAATTATGGAAAATCTTGCTTTTTAATTTTTGATCTGGTAAGACTAAAGCCCTAGAT
CAAGTCGGCTCACCACAATCCCAAATATGAGAGGTTAATGCATCAACAAGTCTCAACAAGATAAGATTCTAATAAAGCCATTTTAAAGTGTATATAAATCXXXXXXXXXXTATTTGCAAAAGGTTCCAAAGGGTTTAACATCCAAAGGGATAGGAATTATAGAAAATCTTGCTTTTTAATTTTTGATCTGGTAAGACTAAAGCCCTAGAT
* ** *
>Marker260521
ATAGTGAAAACTTGGCAAACAGGTGCTATGTGTAGGAGTCAGCACTACCATCTATTCATTCTCTTCCTATCCATCCATATCATTACATAATAAAACCCATXXXXXXXXXXTTTTTCAACATCATACATCCTCACTTTCATCACACATCATCAATCGACACATTCATCACACCACCTAGAACTACATATCATCATCTCATCTCAATCTTAA
ATAGTGAAAACTTGGCAAACAGGTGCTATGTGTAGGAGTCAGCACTACCATCTATTCATTCTCTTCCTATCCATCCATATCATTACATAATAAAACCCATXXXXXXXXXXTTTTTCAACATCATACATCCTCACTTTCATCACACATCATCAATTGACACATTCATCACACCACCTAGAACTACATATCATCATCTCATCTCAATCTTAA
*
>Marker153744
TTCAAAGGTCTAATAAGACCCTAGAAGAGATAATGGGAATATTTTTGGAAGATCTTGCAGATGCTATAAGGAAGAAAAGAGAAAGAGCAATAGAGCTAGAXXXXXXXXXXCCAAGTCCACATACTGAAGAAGGAGAAGAATTAGAGAAATAACAACAATCATCTCCAACAAGGGAACCATCCTCTACTACATCCCCAATACAGTCAATTA
TTCAAAGGTCTAACAAGACCCTAGAAGAGATAATGGGAATATTTTTGGAAGATCTTGCAGATGCTATAAGGAAGAAAAGAGAAAGAGCAATAGAGCTAGAXXXXXXXXXXCCAAGTCCACATACTGAAGAAGGAGAAGAATTAGAGAAATAACAACAATCATCTCCAACAAGGGAACCATCCTCTACTACATCCCCAATATAGTCAATTA
* *
>Marker241868
TTCAGCTTCTTCTATGCAATGCAGAATAGGTAAAGTATGACCAAGATGGTCACTTATTATCCAATGGCTAGCTATTGTGCAGAAATGCATTCCATTATTTXXXXXXXXXXTGAGGTTAATCTCAGCTTTTGTCATCTTGAGCACACTAAGAGAATATTAAGTTATTAACTAAAAGCATGCAAAGTATAAACCACACTGATTTGCAATAGA
TTCAGCTTCTTCTATGCAACGCAGAATAGGTAAAGTATGACCAAGATGGTCACTTATTATCCAATGGCTAGCTATTGTGCAGAAATGCATTCCATTATTTXXXXXXXXXXTGAGGTTAATCTCAGCTTTTGTCATCTTGAGCACACTAAGAGAATATTAAGTTATTAACTAAAAGCATGCAAAGTATAAACCACACTGATTTGCAATAGA
*
>Marker368521
TCCTTGTTGGTTTTTCTAGTTGGGCTGTTGGGCATGTGCTATCGTTCTATTTTGTGTTGTTAATATAATGTTTTTGGCACGTTTGAGGCCTTTTTGCCATXXXXXXXXXXATTTGCAGATTCAACAGATTATGTCCCTCTTCCCGATCTTCACAAAAGGGTCATGGAATCTTGGAAGTCATTGGTTGATGGAAAGATTGAGCTCTTTCCC
TCCTTGTTGGTTTTTCTAGTTGGGCTGTTGGGCATGTGCTATCGTTCTATTTTGTGTTGTTAATATAATGTTTTTGGCACGTTTGAGTCCTTTTTGCCATXXXXXXXXXXATTTGCAGATTCAACAGATTATGTCCCTCTTCCCGATCTTCACAAAAGGGTCATGGAATCTTGGAAGTCATTGGTTGATGGAAAGATTGAGCTCTTTCCC
*
>Marker321807
AGTGTTTGCATTTACAATCAGTGTCCTTATGTAACTATAAGTTCTTATAAGTTTCAATAAAATGGCTTAGATTTTTGATGCTGAGCTATTAGGAGGAATCXXXXXXXXXXTAGGTAAGATTCAGTGAATTTGTATGGCCGTTCTAATGGATAAGAAAGATACATCAACAAAAGACATGAAGAAACTTCTGGCTTGTCCTTCTTGAAAGAA
AGTGTTTGCATTTACAATCAGTGTCTTTATGTAACTATAAGTTCTTATAAGTTTCAATAAAATGGCTTAGATTTTTGATGCTGAGCTATTAGGAGGAATCXXXXXXXXXXTAGGTAAGATTCAGTGAATTTGTATGGCCGTTCTAATGGATAAGAAAGATACATCAACAAAAGACATGAAGAAACTTCTGGCTTGTCCTTCTTGAAAGAA
*
>Marker224052
CTAGTTGATGATACATATTTTCCATCCTCCTTCACTATTACATGTGATATGCATATGCATATGTATATGAAACATATTGAGAATGATCTTTCACATTATAXXXXXXXXXXTAAGTTGTTTGTTAGATTGTTTCCAACAAGCTTGAGTGGTCATGCATTTAGCTCAAAAGATTCACTTAATAAACCAATAGCATAGCACATGCATTCATAG
CTAGTTGATGATACATATTTTCCATCCTCCTTCACTATTACATGTGATATGCATATGCATATGGATATGAAACATATTGAGAATGATCTTTCACATTATAXXXXXXXXXXTAAGTTGTTTGTTAGATTGTTTCCAACAAGCTTGAGTGGTCATGCATTTAGCTCAAAAGATTCACTTAATAAACCAATAGCATAGCACATGCATTCATAG
*
>Marker235698
TTTATTTTCTTGAGCAGAGCAAGGGTATGAGGTTCAAATTTTCACTGTTCTTTTTCATGAATTGCATCTAGTGTCTTCAAAATAGTGTTATGGAGCTTCTXXXXXXXXXXTTTGTGTTAGGAAGGTGCTTGTCCGCATTCACAAGAGGAAAACCCCTTGGCAAATTTATATGGGTATCCATCATTGCTGTTAAACTACGTTGCCAGTTCA
TTTATTTTCTTGAGCAGAGCAAGGGTATGAGGTTCAAATTTTCACTGTTCTTTTTCATGAATTGCATCTAGTGTCTTCAAAATAGTGTTATGGAGCTTCTXXXXXXXXXXTTTGTGTTAGGAAGGTGCTTGTCCGCATTCACAAGAGGAAAACCCCTTGGCAAATTTATATGGGTATCCATCATTGCTGTTAAACTAAGTTGCCAGTTCA
*
>Marker91115
ATAGTGAAAACCTGACAAATAGGTGCTATGAGTAGTGTCAACACCTACCATCTATTAAGTTGTGCATCCATCTCATTTCATATCAATTCATAATAAAACAXXXXXXXXXXTCCTTGTTTGAGGTATGATCATGTCACCAGTCTCACTTCATCTTATCCTACATCATCAAATCTCCTAGAACTACATATCATCATCTCATCTCCATCTTAA
ATAGTGAAAACTTGACAAATAGGTGCTATGAGTAGTGTCAACACCTACCATCTATTAAGTCGTGCATCCATCTCATTTAATATCAATTCATAATAAAACAXXXXXXXXXXTCCTTGTTTGAGGTATGATCATGTCACCATTCTCACTTCATCTTATCCTACATCATCAAATCTCCTAGAACTACATATCATCATCTCATCTCCATCTTAA
* * * *
>Marker125307
CATTTTATATATATTTATTTTCCTTAGATGCAAATGAAGGACCACATCGCTTTACAAACCTTCTTCCCGAAGAACAGAAAGTTCAGGTGATAAGTGAAAAXXXXXXXXXXGGCCAAATCTCCCATTATATTTGGAGGTGACTTAAGGCATATTGATAATGCAACCATGGCCCTCATTACAAATCCTACCATACTTGATATAAATGCTAAC
CATTTTATATATATTTATTTTCCTTAGATGCAAATGAAGGACCACATCGCTTTACAAACCTTCTTCCCGAAGAACAAAAAGTTCAGGTGATAAGTGAAAAXXXXXXXXXXGGCCAAATCTCCCATTATATTTGGAGGTGACTTAAGGCATATTGATAATGCAACCATGGCCCTCATTACAAATCCTACCATACTTGATATAAATGCTAAC
*
>Marker563460
CTTGTAGTTTCACCTTGATCATTGTGTATGATTGTCATTCCTTGATCATTTGAATGCTCAATGGTATCCATTATGACTTGCTTTTCTACATGCTTGATGTXXXXXXXXXXCTAAAACATTTTACAGTCACCTAGGCCAGGTGTGTTATCATGGTGATTGAAAGAGGTTTGTCAACAAGTTTAGGACGATTTTGACCAACTTACAGGAGTG
CTTGTAGTTTCACCTTGATCATTGTGTATGATTGTCATTCCTTGATCATTTGAATGCTCAATGGTATCCATTATGACTTGCTTTTCTACATGCTTGATGTXXXXXXXXXXCTCAAACATTTTACAGTCACCTAGGCCAGGTGTGTTATCATGGTGATTGAAAGAGGTTTGTCAACAAGTTTAGGACGATTTTGACCAACTTACAGGAGTG
*
>Marker368659
CAAATTCTTTGACACCAAAGATACACTTGGAAGGCTTAGCATACAACTGATGCTGCTCCAAAATGTCCAATACTTGATTTACATGTTGCAAGTGTTCCTCXXXXXXXXXXATAGGAAACTTATCTTTTATGGTGAACTTTTTTAGTTCCCTATAATATGGACACATCCTCCAAGTTTCATCTTTCTTGTGCATCATTAGCATTGAAGATG
CAAATTCTTTGACACCAAAGATACACTTGGAAGGCTTAGCATACAACTGATGCTGCTCCAAAATGTCCAATACTTGATTTACATGTTGCAAGTGTTCCTCXXXXXXXXXXATAGGAAACTTATCTTTTATGGTGAACTTTTTTAGCTCCCTATAATATGGACACATCCTCCAAGTTTCATCTTTCTTGTGCATCATTAGCATAGAAGATG
* *
>Marker125332
TCAATCAGAGACTATCAAACATATTTTTTTCATGATGATATCCCTTATTCAAGTGGACTTGAATTTTGTTTTCTCTGAGAGTATGGTGCAGGAACACCTTXXXXXXXXXXTGGAGGAGTTTTATTTCATTATTGTTGTAATAAAGGTCTAAGACCACTCTTATGTATTTAGAGGTCATTTGATAGTGGAGCTTTAAGTTTGCTCAAGTTT
TCAGTCAGAGACTATCAAACATATTTTTTTCATGATGATATCCCTTATTCAAGTGGACTTGAATTTTGTTTTCTCTGAGAGTATGGTGCAGGAGCACCTTXXXXXXXXXXTGGAGGAGTTTTATTTCATTATTGTTGTAATAAAGGTCTAAGACCACTCTTATGTATTTAGAGGTCATTTGATAGTGGAGCTTTAAGTTTGCTCAAGTTT
* *
>Marker45593
TCTCAAAATGGTGGGCAGAAATTTTGGACCAATGGCATGCTGAATTGATTTTCCTTTGGGGTGCAATGGTCGTTAGATGAAGACTCTTTGTAAAAGATGAXXXXXXXXXXGTGAGACTAGCACTACCTTTAGGATGTGAGGGTCTACCATGTGTCTAATTATTGTATCGACTCTTCATATGTATTAGACAAGTGGTAGGGGCCACAAAAA
TCTCAAAATGGTGGGCAGAAATTTTGGACCAATGGCATGCTGAATTGATTTTCCTTTGGGGTGCAATGGTCGTTAAATGAAGACTCTTTGTAAAAGATCAXXXXXXXXXXGTGAGACTAGCACTACCTTTAGGATGTGAGGGTCTACCATGTGTCTAATTATTGTATCGACTCTTCATATGTATTAGACAAGTGGTAGGGGCCACAAAAA
* *
>Marker139662
TGTTCTACCCCTTGACCTTGTTCTTAACCATTAGAAGCTTCTAAGCTAGCTTGAACGTGGGTGTGCCTTGGACAACAACATTCCACCAACTGGCTAACCTXXXXXXXXXXCAGCTAGGTCCATCATGCTGTCAGTGTAGTCTAGGATCCCACCACTTTTTTCGGAGGGGAAGAGGAGGGTGTTAAAGTCCCCAGCCAACATCCAACATCT
TGTTCTACCCTTTGACCTTGTTCTTAACCATTAGAAGCTTCTAAGCTAGCTTGAACGTGGGTGTGCCTTGGACAACAACATTCCACCAACTGGCTAACCTXXXXXXXXXXCAGCTAGGTCCATCATGCTGTCAGTGTAGTCTAGGATCCCACCACTTTTTTCGAAGGGGAAGAGGAGGGTGTTAAAGTCCCCAGCCAACATCCAACATCT
* *
>Marker260979
GGATAATGGAATTTGTTGCATAGCTCATGGACTTCTTGGTTCTTAAAAGGATGTCCATTATTAGTGATAATGGCTTGTGGAACTCCATATCAGCAAATGAXXXXXXXXXXTTTTTTTGCATCTTTCTCCATGGTTGGCCAATAATATCAAGCTCTTAATAGTTTCTTAGAAAGGTTAGGGCCAACAGAATGTGAACCACAGACACCTTCA
GGATAATGGAATTTGTTGCATAGCTCATGGACTTCTTGGTTCTTAAAAGGATGTCCATTATTAGTGATAATGGCTTGTGGAACTCCATATCGGCAAATGAXXXXXXXXXXTTTTTTTGCATCTTTCTCCATGGTTGGCCAATAATATCAAGCTCTTAATAGTTTCTTAGAAAGGTTAGGGCCAACAGAATGTGAACCACAGACACCTTCA
*
>Marker117216
AGGCTTTCAAGTTGTTGTGGCCGTGATGCTCCAAGTCTCATATGTCTTTGCTTAAGGCTGTCCTAGTTTTAAATGAGCGGAGTGTGTGGATGTAATTAGTXXXXXXXXXXAAGTGAGTTAGGTGAAGAGTGATTGCAAGTGATTGATAAGGTTCGCAAGCAAGAAAAAGAGCAGAATGATTGCATTATGATGTGCGATTGAAGGAGAAAG
AGGCTTTCAAGTTGTTGTGGCCGTGATGCTCCAAGTCTCATATGTCTTTGCTTAAGGCTGTCCTAGTTTTAAATGAGCGGAGTGTGTGGATGTAATTAGTXXXXXXXXXXAAGTGAGTTAGGCGAAGAGTTATTGCAAGTGATTGATAAGGTTCGCAAGCAAGAAAAAGAGCAGAATGATTGCATTATGATGTGCGATTGAAGGAGAAAG
* *
>Marker218601
GGTGCGCAAGTCTTGAGGCACCTTTTTGTTCTGGGGTGAGGCAAAAAATGGGCCCCTAGTTCCCAATTGTCATGGGTTTTAGGGATTTTGTATCGGGATGXXXXXXXXXXGTCAAAAAATAAATCAGGGTGTTTAAGGTCCAAGTTCAATAGGTTTAATCTAAATCCTTGTGGTTGATTTTAGCTTTGGGAGGAGGGGTTATATGGTTTA
GGTGCGCAAGTCTTGAGGCACCTTTTTGTTCTGGGGTGAGGCAAAAAATGGGCCCCTAGTTCCCAATTGTCATGGGTTTTAGGGATTTTGTATCGGGATGXXXXXXXXXXGTCAAAAAATAAATCAGGGTGTTGAAGGTCCAAGTTCAATAGGTTTAATCTAAATCCTTGTGGTTGATTTTAGCTTTGGGAGGAGGGGTTATATGGTTTA
*
>Marker271338
TTCTCTAGGGACTAGATGAGAGTTCTTTTTGATACATACCTAAGAGGACTTACAATAAAAAGACTTGGCAGATGAATAATAAGAGGTGAATTATGAGGAGXXXXXXXXXXCAATACCATCTGCTTCTTGGGTAACCAACTTATGAGGAATGAGTTGCATACTCCAACTTTCCAAATCATCTCACTCTAGTGTAAAATCTCTCCTCAATAT
TTCTCTAGGGACTAGATGAGAGTTCTTTTTGATACATACCTAAGAGGACTTACAATAAAAAGACTTGGCGGATGAATAATAAGAGGTAAATTATGAGGAGXXXXXXXXXXCAATACCATCTGCTTCTTGGGTAACCAACTTATGAGGAATGAGTTGCATACTCCAACTTTCCAAACCATCTCACTCTAGTGTAAAATCTCTCCTCTATAT
* * * *
>Marker360129
TAAATTTTTATAGAGATCAATCTATGTGAAGGTTCAAACCCGGGCTCATTTATGTAGTTGCATAGATCACTTCTATGATCATGGAAGTGACCTACTATG--AXXXXXXXXXXATTAAATAAACAGTCAACCTGGATATATGAGTTGGGACTAATATGAGATAATGAACTTAATGCTACAAGTAATGCAAAAATAAAATAAATTAAACTTGAA
TAAATTTTTATAGAGATCAATCTATGTGAAGGTTCAAACCCGGGCTCATTTATGTAGTTGCATAGATCAC--CTATGATCATGGAAGTGACCTACTGTGACAXXXXXXXXXXATTAAATAAACAATCAACCTAGATATATGAGTTGGGACTAATATGAGATAATGAACTTAATGCTACAAGTAATGCAAAAATAAAATAAATTAAACTTGAA
* * *
>Marker380528
ATAATTAGTTACAATCAACATAAACTTATGTTTGGCTAAATAATTATGATTGATAATTCTAATAAAATCAAAACCCTTTTGTGTAAAAGGATGGATCTCAXXXXXXXXXXTTTAATCAATAAGTTTCTTCTCTTTAGTGCAGTTCTCTCCTCTAGGTGGAATTCAAGTGACTTGGACATTTGTTGTAGCACATGTAGTAAAGTAAATCTT
ATAATTAGTTACAATCAACATAAACTTATGTTTGGCTAAATAATTATGATTGATAATTCTAATAAAATCAAAACCCTTTTGTGTAAAAGGATGGATCTCAXXXXXXXXXXTTTAATCAATAAGTTTCTTCTCTTTAGTGCAGTTCTCTCCTCTAGGTGGAATTCAAGTGACTTGGACATTTGTTGTAGAACATGTAGTAAAGTAAATCTT
*
>Marker212360
CCTGCAATCAGAAGGTTCATTGATCTCAAAACTAGTTGAATGAAAGCAAGAATTTAACTAGAATATAATGCCAATTTTATTTTGTTTGAATCAAAGTAACXXXXXXXXXXCAATTTGATTAAAACAAAAAAAAGATGCCATTTTTTTTCTGATATTATGTAAGAAGGGAAATAATATAGGTTAAGATTACTGTTGAGAGTCTAAATAAAC
CCTGCAATCAGAAGGTTCATTGATCTCAAAACTAGTTGAATGAAAGCAAGAATTTAACTAGAATATAATGCCAATTTTATTTTGTTTGAATCAAAGTAACXXXXXXXXXXCAATTTGATTAAAAAAAATAAAAGATGCCATTTTTTTTCTGATATTATGTAAGAAGGGAAATAATATAGGTTAAGATTACTGTTGAGAGTCTAAATAAAC
* *
>Marker388816
ATCTCAAAGTTGATGATTAATGAGGTGGTGGGTTCATTACTTTTTGAGGATAAAAGGTAAAAAACTTCATATTTTGTCAAAGATGCCTTAATAGTGAGAGXXXXXXXXXXATGCATGTGCACTTGAGGGTGCATGGATTATTGAATCTAGAACCTCTTTTCATATGACTCCTAATGAGGCTAATTCTAGCCTCATCAATTCACTAGATGA
ATCTCAAAGTTGATGATTAATGAGGTGGTGGGTTCATTACTTTTTGAGGATAAAAGGTAAAAAACTTCATATTTTGTCAAAGATGCCTTAATAGTGAGAGXXXXXXXXXXATGCATGTGCACTTGAGGGTGCATCGATTATTGAATCTAGAACCTCTTTTCATATGACTCCTAATGAGGCTAATTCTAGCCTCATCAATTCACTAGATGA
*
>Marker67045
CTTTGAGAATTTGAATTCGTTCCTAGCCAATAGGCCAACTCATTGATAATGAATGAAGAGAAAGAAAAAGTGCAAGAGAGTTATTTTTTCGGCAAGTTA-GXXXXXXXXXXCATAAAATTCAACACTATTATTACAAAAGAATTCCCACAAAACTCAGAACTATTTTCAAATTTCTTCTCATTCCATTCCATCCTGCCACAACTGAAAAAA
CTTTGAGAATTTGAATTCGTTCCTAGCCAATAGGCCAACTCATTGATAATGAATGAAGAGAAAGAAAAAATGCAAGAGAGTTA-TTTTTCGGCAAGTTAGGXXXXXXXXXXCATAAAATTCAACACTATTATTACAAAAGAATTCCCACAAAACTCAGAACTATTTTCAAATTTCTTCTCATTCCATTCCATCCTGCCACAACTGAAAAAA
*
>Marker291565
CAAAATATATGGTTCAACATTTTGAGTCTAAATATCCTCAAAATCATAAATGGTAGAAATAGGAACAACAAGCTTAGATCTCTAACAAAAATAGCATATGXXXXXXXXXXTGTCAAACCCGATAGGTTCTTTCAAGCTCGCCCTCAAAAATGAGTCTGTGTCGAAGTGGACCTTTCACGGGATTTGAAAGAGTCCATTGATATTCAAACT
CAAAATATATGGTTCAACATTTTGAGTCTAAATATCCTCAAAATCATAAATGGTAGAAATAGGAACAACAAGCTTAGATCTCTAACAAAAATAGCATATGXXXXXXXXXXTGTCAAACCTGATAGGTTCTTTCAAGCTCGCCCTCAAAAATGAGTCTATGTCGAAGTGGACCTTTCACGGGATTTGAAAGAGTCCATTGATATTCAAACT
* *
>Marker301583
TATTATAAGTTGCATCATCCAATATGTAGGGAGATAATAGGCAAGCCACACCTTCATATTG-AGTATGTGTTTTGATTATTGCATCTTTAAAAGATTGAATXXXXXXXXXXCCTTGATTTCCCTTTGTTAATTTGTGTCTTCCCATGTTGAGTGAGGTATAACAACTCAAAATTTTCCTAAATAATGTATTCTAAATTTTGAACAATTGGG
TATTATAAGTTGCATCATCCAATATGTAGGGAAATAATAGGCAAGCCACACCTTCATATTGAAATATGTGTTTTGATTATTGCATCTTTAAAAGATT-AAAXXXXXXXXXXCCTTGATTTCCCTTTGTTAATTTGTGTCTTCCCATGTTGAGTGAGGTATAACAACTCAAAATTTTCCTAAATAATGTATTCTAAATTTTGAACACTTGGG
* * * *
>Marker149777
AGGTTTTGAAGAACTTAAGCACATGTATGAGGATGATCTTGATTTTGCATAAGGATGGAAAGCATGTAAGAAAATTGTTGGGATAGATAGAAGCAAGTGTXXXXXXXXXXACAAACCTTTGACAATAATAAAGTGGCCTTGGGAAGATATAAGAATGGGTTTCATATTGGGACTACCAAGAACATAGAGGGGACATGATTCCATATTTGT
AGGTTTTGAAGAACTTAAGCACATGTATGAGGATGATCTTGATTTTGCATAAGGATGGAAAGCATGTAAGAAACTTGTTGGGATAGATAGAAGCAAGTGTXXXXXXXXXXACAAACCTTTGACAATAATAAAGTGGCCTTGGGAAGATATAAGAATGGGTTTCATATTGGGACTACCAAGAACATAGAGGGGACATGATTCCATATTTGT
*
>Marker520906
CCTGAACAACTTGTTTGTAGTTTGACATCAAGTAAGAACCACATCACAAAACCCACTATTGTGACATCCATTTTGACATCGATGGCAAGACAACCAATATXXXXXXXXXXTAGGATATGATAGGAAATGGTAGGATGAAAATGATAGTGTGGAAAATGGTAAGTTGGATGAGACAATGTGCCCCCAAGTGTAAGTGACATAGAAGGTCAA
CCTGAACACCTTGTTTATAGTTTGACATCAAGTAAGAACCACATCACAAAACCCACTATTGTGACATCCATTTTGACATCGATGGCAAGACAACGAATATXXXXXXXXXXTAGGATATGATAGGAAATGGTAGGATGAAAATGATAGTGTGGAAAATGGTAAGTTGGATGAGACAATGTGCCCCCAAGTGTAAGTGACATAGAAGGTCAA
* * *
>Marker152608
CACCCTAT-TTACATGGGTTCACGAAAGTTTAACCTCGATACT-------CATTCTGATCTTTTCCCAACATCTATTTCCTTCTCCCCTGGTGATACTCTCCTTCCATXXXXXXXXXXCTTAAGTAGATTGTCATGCATGATTTCCACTCAAAATAGTTGTGAGGAGTTAAGATGGGAGTTGTTGGTTGATCCATGATGCAGAGAATACAGAAAATGA
CACCCTATCCTACATGGGTTCATGAAAGTTTAACCTCAATACTCAGATGGCATTCTGATCTTTTCCCAACATCTATTTCCTTCTCCCCTGGTGATACTCT--------XXXXXXXXXXCTTAAGTAGATTGTCATGCATGATTTCCACTCAAAATAGTTGTGAGGAGTTAAGATGGGAGTTGTTGGTTGATCCATGATGCAGAGAATATAGAAAATGA
* * * *
>Marker163671
CTCCTGTAACTCCACTTTTCATGTATCTTCAACCTATAACCTACAATCATAGAAACTTTGGGAGGGGGTTGTGGTGTTTAGAGGCTTGCCTCAGTCAAGCXXXXXXXXXXTCACGTAAGCAGAAACATAATCAACACATTTGGCACCAAGATTTTTGAGGTGGAAACCCGGTTAAAGGAAAAACCATTGTGGGTGTTAGCCCACAAGATT
CTCCTGCAACTCCACTTTTCATGTATCTTCAACCTATAACCTACAATCATAGAAACTTTGGGAGGGGGTTGTGGTGTTTAGAGGCTTGCCTCAGTCAAGCXXXXXXXXXXTCACGTAAGCAGAAACATAATCAACACATTTGGCACCAAGATTTTTGAGGTGGAAACCCGGTTAAGGGAAAAACCATTGTGGGTGTTAGCCCACAAGATT
* *
>Marker337894
TGTTGTGCTCTTATGGTAAAACCAAGGATTGTCACCTTAAGGAATGATATGGACTCACCATGATGTCATCATGCCCATGTGACCCACTCACAAGCATTTCXXXXXXXXXXGCCACTATCTTCATGTTGGCACAACTTCCATTGTAGATCAAAGTAATTTAATGGTTTGCACTATAGTATATACTAGAAATTTCATATAAAACTTTCAAAT
TGTTGTGCTCTTATGGTAAAACCAAGGATTGTCACCTTAAGGAATGATATGGACTCACCATGATATCATCATGCCCATGTGATCCACTCACAAGCATTTAXXXXXXXXXXGCCACTATCTTCATGTTGGCACAACTTCCATTGTAGATCAAAGTAATTTAATGGTTTGCACTATAGTATATACTAGAAATTTCATATAAAACTTTCAAAT
* * *
>Marker308160
AAAAAAGGAAAACAGCTAACAAGATTTGTCACTTTGTTAGTGACACCCTTTTGATACTTGATTACCAGATGAAATTGCTGAATGTCAAATGGCCTCTTCAXXXXXXXXXXTACTTCAATACCCTCCCTTAATGGTCAATCTACTAACTACACAAAGCTTATCCCGAAATTTTAGAAATTTGTCAAGATTCAAAGACTTGGTAAGAATGTC
AAAAAAGGAAAACAGCTAACAAGATTTGTCACTTTGTTAGTGACACCCTTTTGATACTTGATTACCAAATGAAATTGCTGAATGTCAAATGGCCTCTTCAXXXXXXXXXXTACTTCAATACCCTCCCTTAATGGTCAATCTACTAACTACACAAAGCTTATCCCGAAATTTTAGAAATTTGTCAAGATTCAAAGACTTGGTAAGAATGTC
*
>Marker143654
CCTGGGTATTATGCTCTTCCATTATAATAGATCCTATATCCACTGCAAGTCCCTCCTCTACACTAACTCCTTATTGCATATCTTCTTCATCACTGCTACCXXXXXXXXXX-CTCTTCTTACACTAACTCACTAAACACCACTGGTGTTTGTGTTTCTTCAATATGAACTTCTTTAATAGATACTCCTTCTATAAATGCACCTAAAGGGATG
CCTGGGTATTATGCTCTTCCATTATAATAGATCCTATATCCACTGCAAGTCCCTCCTCTACACTAACTCCTTATTGCATATCTTCTTCATCACTGCTACCXXXXXXXXXXCCTCTTCTTACACTAACTCACTAAACACCACTGGTGTTTGTGTTTCTTCAATATGAACTTCTTTAATAGATACTCCTTCTATAAATGCACCTAAAGGGAT-
>Marker268066
ACCATTAGGTAATTGCTCACAAGCACAAATGACTATGCTACAAGAACTATAGGTGCATTGGTTGTTGGCACTAAATAAATAGCTTTCCAATACCTTGTTGXXXXXXXXXXAAGGATGGCATGCTTCACACACGCCAGTCAACATACATTGAGAAATTAAATAATAACAAAACCCTTGACCAACTAAACAACTTGTTGTAGTCAACATTGA
ACCATTAGGTAATTGCTCACAAGCACAAATGACTATGCTACAAGAACTATAGGTGCATTGGTTGTTGGCACTAAATAAATAGCTTTCCAATACCTTGTTGXXXXXXXXXXAAGGATGGCATGCTTCACACATGCCAGTCAACATACATTGAGAAATTAAATAATAACAAAACCCTTGACCAACTAAACAACTTGTTGTAGTCAACATTGA
ACCATTAGGTAATTGCTCACAAGCACAAATGACTATGCTACAAGAACTATAGGTGCATTGGTTGTTGGCACTAAATAAATAGCTTTCCAATACCTTGTTGXXXXXXXXXXAAGGATGGCATGCTTCACACACGCCAGTCAACATACATTGAGAAATTAAATAATAAAAAAACCCTTGACCAACTAAACAACTTGTTGTAGTCAACATTGA
* *
>Marker166568
ATTATTAGCATATAGCATTTTTCATTGCTTCTCTCTTGTGTGGAAGGTTTTTTGGTGTTGCAAAGTGTTCCTACTCCTATGAGTCATTTGGGCGACTTCAXXXXXXXXXXGAATCTAAGGTTTGGGGCAATTTTGCATGTCCTCAATTTTCTTGGGATCATCATTAACACTTTCAACAAAGACAATATTGCCAAGATGTTCCTCCTCTAT
ATTATTAGCATATAGCATTTTTCATTGCTTCTCTCTTGTGTGGAAGGTTTTTTGGTGTTGCAAAGTGTTCCTACTCCTATGAGTCATTTGGGTGACTTCAXXXXXXXXXXGAATCTAAGGTTTGGGGAAATTTTGCATGTCCTCAATTTTCTTGGGATCATCATTAACACTTTCAACAAAGACAATATTGCCAAGATGTTCCTCCTCTAT
* *
>Marker311699
GACATCCCCAAACTCAACAGTAGAACCACCAAGCCAATAATGGCTATAGACCTTTTCAAAACGACCAAGATTTCCAACAAAGGCTAGCTTTTCAACCAAAXXXXXXXXXXGATCAACAAATGCTAGAGCAAACTTTGGTAACATACAAAGATTGTGTATCCAATACAATAATTGAGCCTTTTGCAAACATGGAAAAACATGTTTGTTTCG
GACATCCCCAAACTCAACAGTAGAACCACCAAGCCAATAATGGCTATAGACCTTTTCAAAACGACCAAGATTTCCAACAAAGGCTAGCTTTTCAACCAAAXXXXXXXXXXGATCAACAAATGCTAGAGCAAACTTTGGTAACATACAAAGATTGTGTATCCAATACAATAATTGAGCCTTTTGCAAACATGGAAAAACATGTTTGTTCCG
*
>Marker280716
AAGATCTTTACTAGTTCCTGACCGAATATTGGGAGCAGTTGTTCAATCAGCCTTAGGGGCTTTTTCTATGCTTTCTGTTGTTTGTCTGTTGTTCATCTGCXXXXXXXXXXGGGAGAGTTGATTTGCAGGATTCTTTGAGGTGAGTTTTTCAAGTATTGTGGTATAGAAAACATAGTGGTTTACATATGATAATGATGTTGTAAGTCTTGT
AAGATCTTTACTAGTTCCTGACCGAATATTGGGAGCAGTTGTTCAATCAGCCTTAGGGGCTTTTTCTATGCTTTCTGTTGTTTGTCTGTTGTTCGTCTGCXXXXXXXXXXGGGAGAGTTGATTTGCAGGATTCTTTGAGGTGAGTTTTTCAAGTATTGTGGTATAGAAAACATAGTGGTTTACATATGATAATGATGTTGTAAGTCTTGT
AAGATCTTTACCAGTTCCTGACCGAATATTGGGAGCAGTTGTTCAATCAGCCTTAGGGGCTTTTTCTATGCTTTCTATTGTTTGTCTGTTGTTCGTCTGCXXXXXXXXXXGGGAGAGTTGATTTGCAGGATTCTTTGAGGTGAGTTTTTCAAGTATTGTGGTATAGAAAACATAGTGGTTTACATATGATAATGATGTTGTAAGTCTTGT
* * *
>Marker352442
TGCAAATTTTGCAGCTATATCTTCATCATACCCATTAAGTCTTTGGAAATAAGTGAACCACCTAGCCTATTGAAAGATGGCCAATGCTCTAGCATCATTCXXXXXXXXXXAAATGATGCTGCATGCTTGAACATCACGTTACATGATGTTGTATGCATACGATCATCGACAACTTACAAGGTGACTATGTCGGCAAGTAAAGGGTCGTAT
TGCAAATTTTGCAGCTGTATCTTCATCATACCCATTAAGTCTTTGGAAATAAGTGAACCACCTAGCCTATTGAAAGATGGCCAATGCTTTAGCATCATTCXXXXXXXXXXAAATGATGCTGCATGCTTGAACATCACGTTACATGATGTTGTATGCATACGATCATCGACAACTTACAAGGTGACTATGTCGGCAAGTAAAGGGTCGTAT
* *
>Marker332636
CCGTCGCCATTGTGGACAACAAGGAGAAAAATTACCGCTATTAATTACTTGACATGTAAATGGTTGTCAAATTTAAGGGGTTTTTATTTACATGGTCACCXXXXXXXXXXCTATAATTATGGCCAAAATATCTTAATTACATAAAATGCAAGGAGTATACTCAGCTTGGCAAACATTCTATATCGTTTGTATACATTTATAGCCAAGGAG
CCGTCGCCATTGTGGACAACAGGGAGAAAAATTACCGCTATTAATTACTTGACATGTAAATGGTTGTCAAATTTAAGGGGTTTTTATTTACATGGTCACCXXXXXXXXXXCTATAATTATGGCCAAAATATCTTAATTACATAAAATGCAAGGAGTATACTCAGCTTGGCAAACATTCTATATCGTTTGTATACATTTATAGCCAAGGAG
*
>Marker360054
ATTTACCCAAAAATCATATCTGAAATCATCTAGAATGATATGAATTTGCTTATTGGAATTTTGAACTGCTCCATTAAAGATCGTCATCTTAGGAAAGTCCXXXXXXXXXXTTGCTTGCTCCACTTTGGATTTCAGTATCAGGTGTCTCGAACAATCACTTGGATCCCATATTCTTATAAGTTGTGTTCTTCACCTTTTCTCCATTCTTAT
ATTTACCCAAAAATCATATCTGAAATCATCTAGAATGATATGAATTTGCTTATTGGAATTTTGAACTGCTCCATTAAAGATCGTCATCTTAGGAAAGTCCXXXXXXXXXXTTGCTTGCTCCACTTTGGATTTCAGTATCAGGTGTCTCGAACAACCACTTGGATCCCATATTCTTATAAGTTGTGTTCTTCACCTTTTCTCCATTCTTAT
ATTTACCCAAAAATCATATCTGAAATCATCTAGAATGATATGAATTTGCTTATTGGAATTTTGAACTGCTCCATTAAAGATCGTCATCTTAGGAAAGTCCXXXXXXXXXXTTGCTTGCTCCACTTTGGATTTCAGTATCAGGTGTCTTGAACAACCACTTGGATCCCATATTCTTATAAGTTGTGTTCTTCACCTTTTCTCCATTCTTAT
* *
>Marker93932
TTTGAATGTTTTCTTATCAGATCCTTTCCCTTCTCTCCTATATCCCTCATTCCGGTATGCACTAGGGTTTCCTCTCTGGTAAAAGTTTTTGTCATCTCTTXXXXXXXXXX-GTATCTAGCCACTTTATCCTTGCTTTCTTCACTATGTCCTATCCTTATGATCATCTTGTTAGATTTAGAGTAGACAACTGAGAGGGGGGGGTGAATCAGT
TTTGAATGTTTTCTTATCAGATCCTTTCCCTTCTCTCCTATATCCCTCATTCCGGTATGCACTAGGGTTTCCTCTCTGGTAAAAGTTTTTGTCATCTCTTXXXXXXXXXXTGTATCTAGCCACTTTATCCTTGCTTTCTTCACTATGTCCTATCCTTATGATCATCTTGTTAGATTTAGAGTAGACAACTGAGA-GGGGGGGTGAATCAGT
>Marker87014
CCACCTGTATTGAGACTCAGACACATGGCGAGACCTGCGCGCTTAAAACTGAAAAGAAATATGATAGATGGCTATGTCCGCATCTACTTAGAAACTCCTTXXXXXXXXXXGATGGCGGCCCCCGTGCTCATGCTAGCTAACACATGGCAACTTCTGCAGCACTGCTGAAACAAATAAAACTATTGAAAGGTATTGCAAAAGTCGACACTT
CCACCTGTATTGAGACTCAGACACATGGCGAGACCTGCGCGCTTAAAACTGAAAAGAAATATGATAGATGGCTATGTCCGCATCTACTTAGAAACTCCTTXXXXXXXXXXGATGGCGGCCCCCGTGCTCATGCTAGCTAACACATGGCAACTTCTGCAGCACTGCTGAAACAAATAAAACTGTTGAAAGGTATTGCAAAAGTCGACACTT
*
>Marker274838
AAACTTGAATGTTGCAATGGATAAGATAATAGTCATATGTCCTTCCCTAGTAGAGTAAACCAAAAACTAGTTACTATTGAGTGGTTTTGTCATACATGTTXXXXXXXXXXCAACCTTCTACACTAGGCAAACCCAAAATGATACACAATTAAAATTAATTCAATCTGAATGTGAACCACCCCAAAATTATTGTAAAGATTATAAATTGCA
AAACTTGAATGTTGCAATGGATAAGATAATAGTCATATGTCCTTCCCTAGTAGAGTAAACCAAAAACTAGTTACTATTGAGTGGTTTTGTCATACATGTTXXXXXXXXXXCAACCTTTTACACTAGGCAAACCCAAAATGATACACAATTAAAATTAATTCAATCTGAATGTGAACCACCCCAAAATTATTGTAAAGATTATAAATTGCA
*
>Marker194444
TACAATACTTAAATTAGTTATTTGTGGGTCATTTACATCAATCAATCATCAAGAAACATATGTTATCCATCAATTGCCAAGAAGAAGCATCTAAGACCTAXXXXXXXXXXGATGATGATTCAATTCCTTTAAAGCTCTTGAATTCTAAAGTAGATAGTCTAGTTCTTTTCCAATCTCATTATGATGTGTTTAAATGCTAAAATGAGAATT
TACAATACTTAAATTAGTTATTTGTGGGTCATTTACATCAATCAATCATCAAGAAACATATGTTATCCATCAATTGCCAAGAAGAAGCATCTAAGACCTAXXXXXXXXXXAATGAGGATTCAATTCCTTTAAAGCTCTTGAATTCTAAAGTAGATAGTCTAGTTCTTTTCCAATTTCATTATGATGTGTTTAAATGCTAAAATGAGAATT
* * *
>Marker153705
CCAAATCACGTTTGCAAGAAAATGCAC--AGACACAACAGATTAAAATTTGGAAGCATCAAACTTTTACTTTACTTGAGAATGGGAAATGTCGAAGACTTCAXXXXXXXXXXATTATCTGCTGCAGGCCGTAGATGACTAACTTTGAACACAGTTTAAAAGGTAAGTAGGTTATTTTAAATTAATTTCATTATCTGCTGCAGGCAGTGTATG
CCAAATCACGTTTGCAAGAAAATGCACAAAGACACAACAGATTAAAATTTGGAAGCATCAAACTTTTACTTTACTTGAGAATGGGAAATGTCAGAGACTT--XXXXXXXXXXATTATCTGCTGCAGGCCGTAGATGACTAACTTTGAACACAGTTTAAAAGGTAAGTAGGTTATTTTAAATTAATTTCATTATCTGCTGCAGGCCGTGTATG
** *
>Marker372300
ACTTTTGTTCTCCCCCCTTTGCTATACCCCACTAGAAGGTGTGGTTGAGGTCATCCCCTAGGGTGATGAAATCCATAGGCAACCCCATAAAGGGAAAGGAXXXXXXXXXXAATGCAAGGAAAGAGCATACACACACCTTAGAACACACCATATTCACCAAAAAAAGAAAACACAAGTGGGTTTGAATGATAAATTTTGGACAATCGAACC
ACTTTTGTTCTCCCCCCTTTGCTATACCCCACTAGAAGGTGTGGTTGAGGTCATCCCCTAGGGTGATTAAATCCATAGGCAACCCCATAAAGGGAAAGGAXXXXXXXXXXAATGCAAGGAAAGAGCATATACACACCTTAGAACACACCATATTCACCAAAAAAAGAAAACACAAGTGGGTTTGAATGATACATTTTGGACAATCGAACC
* * *
>Marker355928
ATAGTTAATCACTATTAGGACATACCTATGGCCAGCTTAGGATGGTGGATTTATTGCTCCTATGAAGTCCATTCCATTGTGCAAGGGACGTGTCTCCATCXXXXXXXXXXTTCATCATGTATTTCTGGGATTTTACTTTCAATGCTCTTCTCTGTGAAGACTTCATGTTTCTTGGATACTTCCCTGAGATTAGGATATGTTTGATACTAG
ATAGTTAATCACTATTAGGACATACCTATGGCCAGCTTAGGATGGTGGATTTATTGCTCCTATGAAGTCCATTCCATTGTGCAAGGGACGTGTCTCCATCXXXXXXXXXXTTCATCATGTATTTCTGGGATTTTACTTTCAATGCTCTTCTCTATGAAGACTTCATGTTTCTTGGATACTTCCCTGAGATTAGGATATGTTTGATACTAG
*
>Marker117653
ATGCCTATTGGTTACAACATAGGCCAGTCAGGTTCATAGGTCTTGGAGCACTTGGTGCAACAAGAGAGATGGAAGGCCCCAAACAGGAGGCCAGAGCATGXXXXXXXXXXCAACAACACCACCACCACCACTAGTAGATGATGGGGTTGTGGCAAGATTGACAGCATAGCGAGATGCCTTCATTTAGGCGAGATTAGCAGCTGAGGCTAC
ATGCCTATTGGTTACAACATAGGCCAGTTAGGTTCATAGGTCTTGGAGCACTTGGTGCAACAGGAGAGATGGAAGGCCCCAGATAGGAGGCCAGAGCATGXXXXXXXXXXCAACAACACCACCACCACCACTAGTAGATGATGGGGTTGTGGCAAGATTGACAGCATAGCGAGATGCCTTCATTTAGGCGAGATTAGCAGCTGAGGCTAC
* * * *
>Marker484877
ATGTTGTAAATACTTGATAATAATATGCCACTTCGAGGGGGCAACTTTCAAAAGTCTCTAATGAAGAACATAATTCACAATATAATAATGACTAACCTCTXXXXXXXXXXCAACTAGATGTTTCTACACAAAATTTTCATCTTTCCATGTGGCCTCTTCAACTAGTAAATTCTTCCACTATATGAGATACTTGGTGATTGTCCTAGT-CT------C--
ATGTTGTAAATACTTGATAATAATATGCCACTTCGAGGGGGCAACTTTCAAAAGTCTCTAATGAAGAACATAATTCACAATATAATAATGACTAACCTCTXXXXXXXXXX---------GTTTCTACACAAAATTTTCATCTTTCCATGTGGCCTCTTCAACTAGTAAATTCTTCCACTATATGAGATACTTGGTGATTGTCCTAGTCCTCAACATCTT
>Marker162183
TAATTTAAGAAGAAATACATTCATCCTTGAGTGAATCAATATCTAATATTCCCAAGGTATGATCTCAATGATTATTATAGATGACATTTGCAGAATGATGXXXXXXXXXXTAGATTAAATTTTTACACTCCTCCACAATAGGGAAAAAACCCTTGAAAAACTATCCCAAGACATGGCATCTTTGAGAGATGAAAAGTTGCAACCAGAGAA
TAATTTAAGAAGAAATACATTCATCCTTGAGTGAATCAATATCTAATATTCCCAAGGTATGATATCAATGATTATTATAGATGACATTTGCAGAATGATGXXXXXXXXXXTAGATTAAATTTTTACACTCCTCCACAATAGGGAAAAAACCCTTGAAAAACTATCCCAAGACATGGCATCTTTGAGAGATGAAAAGTTGCAACCAGAGAA
*
>Marker176951
ATGGTGGCTGCAATGATGAAACGTTTCAGCTGAAATCTTTCAACTTCTTCTAGCAAAGGATATTCTCTTAAATTATGCCAACTTGCAGTTGTTCATGATTXXXXXXXXXXAATTCAGTTCCGACCTCTCGGGTGCTCTCTAACTTTCTTGGAGAAACATGCTATTTTTAGATGGTCACCCAACGACCTCCGATTTTCATTCCAAGTCTTC
ATGGCGGCTGCAATGATGAAACCTTTCAGCTGAAATCTTTCAACTTCTTCTAGCAAAGGATATTCTCTTAAATTATGCCAACTTGCAGTTGTTCATGATTXXXXXXXXXXAATTCAGTTCCGACCTCTCGGGTGCTCTCCAACTTTCTTGGAGAAACATGCTATTTTTAGATAGTCACCCAACGACCTCCGATTTTCATTCCAAGTCTTC
* * * *
>Marker232932
TAGATTTCACCAACATAGTTAGGTGACTGAGTTTTTGTGTTAGAAACCAAATCTCTTGTTGCAATGTAAAGTTATTGCAAGTAATACCATCTGAACAAAAXXXXXXXXXXAGCCTATTTGAAATTGCATAGCACAAAGAAAAAATGATAAATATGAGATGTAACTACTTCCCAAATTAAAAAGGAAATGCAATCATTGTTAATTATATTA
TAGATTTCACCAACATAGTTAGGTGACTGAGTTTTTGTGTTAGAAACCAAATCTCTTGCTGCAATGTAAAGTTATTGCAAGTAATACCATCTGAACAAAAXXXXXXXXXXAGCCTATTTGAAATTGCATAGCACAAAGAAAAAATGATAAATATGAGATGTAACTACTTCCCAAATTAAAAAGGAAATGCAATCATTGTTAATTATATTA
*
>Marker189110
AGTCCTCTATGCAAACTACCTCTAGTTCTTCTCACTTCTAATGATCTAATTTTAGTGTTCTTGCAATCCTTGCACTACCTCAATGGTTGGCAGTCTGAGAXXXXXXXXXXTTGCAAATCCTTCCGCACACATCAAAATCTTCTAGTTTCTTCTTCGCATACACTTCTCCTATACTTCTCTCTATTTCTTTATCCATATTTACTTCACTTT
AGTCCTCTATGCAAACTACCTCTAGTTCTTCTCACTTCTAACGATCTAATTTTAGTGTTCTTGCAATCCTTGCACTACCTCAATGGTTGGCAGTCTAAGAXXXXXXXXXXTTGCAAATCCTTCCGCACACATCAAAATCTTCTAGTTTCTTCTTTGCATACACTTCTCCTATACTTCTCTCTATTTCTTTATCCATATTTACTTCACTTT
* * *
>Marker419750
AAGGACCTATGAATGCTACTACAGAGGCCATTTGGCTTCAAGATATCTTGATTGAGTTTGACATCTCCTATTGATGACCATCGATCATCTATTGTGATAAXXXXXXXXXXCACAAGTCTACATTTGGCTACAAGTTTCACCTTGGATTTAATCCAATTTTTTGGTCAAACAAAAAGCAACATGCTATTGCTCTTTCATTTATAGAGGCAA
AAGGACCTATGAATGCTACTACAGAGGCCATTTGGCTTCAAGATATCTTGATTGAGTTTGAAATCTCCTATTGATGACCATCGATCATCTATTGTGATAAXXXXXXXXXXCACAAGTCTACATTTGGCTACAAGTTTCACCTTGGATTTAATCCAATTTTTTGGTCAAACAAAAAGCAACATGCTATTGCTCTTTCATTTATAGAGGCAA
*
>Marker125890
TCGGAGAGGCATTACTAAGAAGTCTCATGATCACTAGAGGCATGCGGTAACACTCAGGAATGGTCACCTAGTGGTAAACAAACGTAGGACGCTAGCGTATXXXXXXXXXXCACTACGTGCATATGCAAGCTAAAGTAGAACTAAAATAACATAATATATTTTACCTCCAAAAAGGATTATTGTAAGGATGTAGATGGTTCTTTGAACAAA
TTGGAGAGGCATTACTAAGAAGTCTCATGATCACTAGAGGCATGCGGTAACACTCAGGAATGGTCACCTAGTGGTAAACAAACGTAGGACGCTAGCATATXXXXXXXXXXCACTACGTGCATATGCAAGCTAAAGTAGAACTGAAATAACATAATATATTTTACCTCCAAAAAGGATTATTGTAAGGATGTAGATGGTTCTTTGAACAGA
* * * *
>Marker234687
CTCCATAATCATCCACTCATATACAAATACAAGAGCCTACTAGTCCTATCCACAAAATGATTCTTGGGAGGTAACCCTACAACAATTGGTCCAAGCACAAXXXXXXXXXXCTTCAAACATCATTTCCATTCCTTCAACCCCATCATGTAATCCACAAACCCATCAAGCCTATTGAAGAGTCTCCTACCATGAGTCCAAGTCAAGATTCGT
CTCCATAATCATCTACTCATATACCAATACAAGAGCCTACTAGTCCTATCCACAAAATTATTCTTGGGAGGTAACCCTACAACAATTGGTCCAAGCACAAXXXXXXXXXXCTTCAAATATCATTTCCATTCCTTCAACCCCATCATGTAATCCACAAACCCATCAAGCCTATTGAAGAGTCTCCTACCATGAGTCCAAGTCAAGATTCGT
* * * *
>Marker228639
TCAAACCTAGGGGGGTTATGATTTATGTATTTAGGATGTTTATCTAGTAGTGAAATGGATCCTTAAAGCACTTGATGGTTGTAAGCCCTGGAAAGTTCTTXXXXXXXXXXAGGGGCTTTGACAAGCCATTAACCCAGGTAGCAAAATGAACAACACAACAATGAAACAAAAACCTCTTTATTCATATGCAATAGAAAACATTACATCATG
TCAAACCTAGGGGGGTTATGATTTATGTATTTAGGATGTTTATCTAGTAGTGAAATGGATCCTTAAAGCACTTGATGGTTGTAAGCCCTGGAAAGTTCTTXXXXXXXXXXAGGGGCTTTGACAAGCTATTGACCCAGGTAGCAAAATGAACAACACAACAATGAAACAAAAACCTCTTTATTCATATGCAATAGAAAACATTACATCATG
* *
>Marker272460
TTTACATCTATTGTGACTACTTGGATGGTGTATTCATTGCTATAGTAGGCCAAAGGATTTGAATTTGGGTTATTACTTGCATGAGTAGTGATCTTACATGXXXXXXXXXXATAGTCTTAGGCAACAATTCATGTATTTTTTAATCTTGTCTCTCATATCTCCATTGGCTATAATCTCTTAGAGAAGGAATACAATGTAGGGCTCTCTTTA
TTTACATCTGTTGTGACTACTTGGATGGTGTATTCATTACTATAGTAGGCCAAAGGATTTGAATTTGGGTTATTACTTGCATGAGTAGTGATCTTACATGXXXXXXXXXXATGGTCTTAGGCAACAATTCATGTATTTTTTAATCTTGTCTCTCATATCTCCATTGGCTATAATCTCTTAGAGAAGGAATACAATGTAGGGCTCTCTTTA
* * *
>Marker389464
ATATCCCAATTCATGTCTTTATCTTTAAGTTGTTCATATTTAGGATCATCTTTGTTTGGTTCAATGTTTGCTTGTTGAGTTATATGCATTATGCTCTTGAXXXXXXXXXXAGGAGGGAGACTAAATATCTTCTCTTCCTTAATAATATCCAAGGTGTGTGAACAAACAACTAAAGGGACAAGGCTGGTAGGATGTTCCATAGAGGTTTCA
ATATCCCAATTCATGTCTTTGTCTTTAAGTTGTTCATATTTAGGATCATCTTTGTTTGGTTCAATGTTTGCTTGTTGAGTTATATGCATTATGCTCTTGAXXXXXXXXXXAGGAGGGAGACTAAAGATCTTCTCTTCCTTAATAATATCCAAGGTGTGTGAACAATCAACTAAAGGGACAAGGCTGGTAGGATGTTCCATAGAGGTTTCA
* * *
>Marker492733
AAGCACATGCACACACACTAGCTAAGAAAAAAAAGAGTCTAGTTGTCTTTAGGGCCATCTTCTTCTCTAGAGACTTTCCTCTACCCCAGGTCTATCTTGTXXXXXXXXXXAAGAGCATTCACATTGTTTGTTCCACATGCATACATCTCAAACATTCAAAAGCAATAATTTCATGTAATAACATAGTGACATTCATAACACTTAGAACAT
AAGCACACGCACACACACTAGCTGAGAAAAAAAAGAGTCTAGTTGTCTTTAGGGCCATCTTCTTCTCTAGAGACTTTCCTCTACCCCAGGTCTATCTTGTXXXXXXXXXXAAGAGCATTCACATTGTTTGTTCCACATGCATACATCTCAAACATTGAAAAGCAATAATTTCATGTAATAACATAGTGACATTCATAACACTTAGAACAT
* * *
>Marker186955
TGATAGTTGACTTTGATGTATATGTAAACTGATGATAATTATATATATGATGCTTTTCTATTATTGCTTCTAATGTTGTCTAATCTATCACATGTGATTTXXXXXXXXXXGATGTGTTTTGAGTAAAATAAGGTCATGTGAGACCATTTGGGGTCAGTCAAGACCAATTTTGATGTTTAGGGGCAAAATATTGTAAAAAAGTGTTATTTT
GGATAGTCAACTTTGATGTATATGTAAACTGATGATAATTATATATATGATGCTTTTCTATTATTGCTTCTAATGTTGTCTAATCTATCACATGTGATTTXXXXXXXXXXGATGTGTTTTGAGTAAAATAAGGTCATGTGAGACCATTTGGGGTCAGTCAAGACCAATTTTGATGTCTAGGGGCAAAATATTGTAAAAAAGTGTTATTTT
* ** *
>Marker375717
TGTTATATTTTGATCTTGCACAATTGGATAATGATGCAAATCCTACATGATTGGTTGATGTTCTTTATAATATTTAATTAACAAGCCCTATGATTTAGAGXXXXXXXXXXTAGTATGTTGCCTTCATCACATCCTACTAGTGTTGTTTCCTTCATCCCACCCACTAGTGTCATGCATACTTCTATTACTTTTAGTGTGGTCACCACTCAT
TGTTATATTTTGATCTTGCACAATTGGATAATGATGCAAATCCTACACGATTGGTTGATGTTCTTTATAATATTTAATTAACAAGCCCTATGATTTAGAGXXXXXXXXXXTAGTATGTTGCCTTCATCACATCCTACTAGTGTTGTTTCCTTCATCCCACCCACTAGTGTCATGCATACTTCTATTACTTTTAGTGTGGTCACCACTCAT
*
>Marker120320
ACCTTCCGAGGTTACAAACACTACTAAATGACTCTATGCAACTCAAATTGTTCCCAAACTGTTATGGTATTATTCCGATGTAAATTTCAGACTGCTGCAGXXXXXXXXXXTGCAAACCCCCTCCAAACCCCTTGGCGCCAACATTCATCACAAAAGAAAACTGAAAAGGTAGACGCTTTGCATACTAGGCCCTCATGTCCAGCTACAGGA
ACCTTCCGAGGTTACAAACACTACTAAATGACTCTATGCAACTCAAATTGTTCCCAAACTGTTATGGTATTATTCCGATGTAAATTTCAGACTGCTGCAGXXXXXXXXXXTGCAAACCCCCTCCAAACCCCTTGGCGCCAACATTCATCACAGAAGAAAACTGAAAAGGTAGACGCTTTGCATACTAGGCCCTCATGTCCAGCTACAGGA
*
>Marker234185
TTATGATATATTTTAAGTTATAAAGTCACATGACTATGGGCGCCCAAGTATAAGGAGAAATAAAGTAATTAAAACTCACAATTCCCAAAAAGAGGGCGTTXXXXXXXXXXAAGGAAATATCTAAAGTTTTGTCACCATAATTATCAGAAGATATTGAGGAATGTATTGCAGGTTATGGCATTGTTTTTGATGGCATTTTGATGTGTATTT
TTATGATATATTTTAAGTTATAAAGTCACATGACTATGGGCGCCCAAGTATAAGGAGAAATAAAGTAATTAAAACTCACAATTCCCAAAAAGAGGGCGTTXXXXXXXXXXAAGGAAATATCTAAAGTTTTGTCACCATAACTATCAGAAGATATTGAGGAATGTATTGCAGGTTATGGCATTGTTTTTGATGGCATTTTGATGTGTATTT
*
>Marker98288
AAGGGCCACTTGGAGTTAAATGTGCATCTTGTTGCAAAGGTAGATTTGGGCTCATTTGAGCTTGTTGGGGAGGCCATTGATAGTCTTGACAGCTAGGTGTXXXXXXXXXXGGCATTCACTTGGTGGATAGGTGGATTAGGTTGATAGGAAGTGGATGGATATGATATGTGGCAAGATGGAGTAGGTTGGGAGTGAATGGATAAATATTGT
AAGGGCCACTTGGAGTTAAATGTGCATCTTGTTGCAAAGGTAGATTTGGGCTCATTTGAGCTTGTTGGGGAGGCCATTGATAGTCTTGACAGCTAGGTGTXXXXXXXXXXGGCATTCACTTGGTGGATAGGTGGATTAGGTTGATAAGAAGTGGATGGATATGATATGTGGCAAGATGGAGTAGGTTGGGAGTGAATGGATAAATATTGT
*
>Marker114792
TCTCTCACTAAAATTCTCCCATAGAACCTTCACTTGTGTGATTTTCCTATTTCAAAATTTGACTTGCCTATGATCCACAATCCTAATGGGATCCATATAGXXXXXXXXXXCTCCAAGGGGGAGGTTGTTATATGGAGCCTAATCAAACTCGGAGGTTAAATTTACCCCACTTTTATCAGTGCGATTTCCCCCCAAATTATTTAATGGGGG
TCTCTCACTAAAATTCTCCCATAGAACCTTCACTTGTGTGATTTTCCTATTTCAAAATTTGACTTGCCTATGATCCACAATCCTAATGGGATCCATATAGXXXXXXXXXXCTCCAATGGGGAGGTTGTTATATGGAGCCTAATCAAACTCAGAGGTTAAATTTACCCCACTTTTATCAGTGCGGTTTCCCCCCAAATTATTTAACGGGGG
* * * *
>Marker116827
CATGATCAAGCCGACAACGTAGAATACATTACATACAAGCTTCATTCCTACCTTGCTGACCTGATTATGAAATGAATCTTGTTGCGGATATAAATACTTGXXXXXXXXXXTCTTCTCTCTTGGAAGTAATCCTTTGTGTAGTGAGCACTTCTTCATAGGGCAATGAGTCATGGGCAGTCAGCCCTAAGACAGTGAGCCTTCTTGTAATTT
CATGATCAAGTCGACAACGTAGAATACATTACATACAAGCTTCATTCCTACCTTGCTGACCTGATTATGAAATGAATCTTGTTGCGGATATAAATACTTGXXXXXXXXXXTCTTCTCTCTTGGAAGTAATCCTTTGTGTAGTGAGCACTTCTTCATAGGGCAATGAGTCATGGGCAGTCAGCCCTAAGACAGTGAGCCTTCTTGTAATTT
*
>Marker214922
ACCCCATCCCTTTGAGAACTCCCTAAGTCTCCAACATGTGACATCCCAACCAAGACCACCCACTTATCTTTGTCGACTCACCTCATGTGTCTGATGACTCXXXXXXXXXXACTACAATCATTACCTAGCTAGTCACACCTTCCGGTTTTTGTTTGCTCCTCAGATCAATGACCCAGTCATT-TCCTAACCTCTCAACATGTAGCCCATTGA
ACCCCATCCCTTTCAGAACTCCCTAAGTCTCCAACATGTGACATCCCAACCAAGACCACCCACTTATCTTTGTCGACTCACCTCATGTGTCTGATGACTCXXXXXXXXXX-CTACAATCATTGCCTAGCTAGTCACACCTTCCAGTTTTTGTTTGCTCCTCAGATCAATGACCCAGTCATTGTCCTAACCTCTCAACTTGTAGCCCACTGA
* * * * *
>Marker269785
TCTCCAACTTTAGCCACTGTTGCATCCATTTCCTCTTCTTCATTCTTTTCTTCTTTGTTGCTCATGTCTTCATTTTTACCCTTTTTCTCCATGCCTTCCTXXXXXXXXXXTGGTAAGGTGATCAATTTTGTGTTTGAGCATGATGCAGAGGTAAATACTCATGTCCTTGCATGTTTTCTATATCCACACATATATATCTCATCAGTTGGG
TCTCCAACTTCAGCCACTGTTGCATCCATTTCCTCTTCTTCATTCTTTTCTTCTTTGTTGCTCATGTCTTCATTTTTACCCTTTTTCTCCATGCCTTCCTXXXXXXXXXXTGGTAAGGTGATCAATTTTGTGTTTGAGCATGATGTAGAGGTAAATACTCATGTCCTTGCATGTTTTCTATATCCACACATATATATCTCATCAGTTGGG
* *
>Marker440311
AAGTAGCAACAACGGTATAAAATCCCCAAGTAATAGAGTCCCAAGTGCGAAGGACTTCTGAATAGGATTATGTTTGCTCAGAGGTCTGGGTGGATTGAAAXXXXXXXXXXAAAGGATTTGAACTCGGGTCATTTCTGAGAGAATGCATTAATCTTACCAGCAGACTACATTAACTCTAATTTGTCGATTTGGTTATGAATTTGAGGTTTG
AAGTAGCAACAACGGTATAAAATCCCCAAGTAATAGAGTCCCAAGTGCGAAGGACTTCTGAATAGGATTATGTTTGCTCAGAGGTCTGGGTGGATTGAAAXXXXXXXXXXAAAGGATTTGAACTCGGGTCATTTCTGAGAGAATGCATTAATCTTACCAGCAGACTACATTAACTCTAATTTGTCGATTTGGTTATGGATTTGAGGTTTA
* *
>Marker511469
AAGTTTTGAGACTTAAAATGTAATCCTCCCAAAACCATAACCCAACACTAAGAATGGTCTTTATGTCATTTGAATACAAAAACTCCACAATAAAAAACCTXXXXXXXXXXAGATCATTGAAGATAATATAAATATTTCATTCTTGACAAAGGATTATTCATTTCCTTCTTGTCATTCACTATTGATGATTATTCTATAATATATTCCCTA
AAGTTTTGAGACTTAAAATGTAATCCTCCCAAAACCATAACCCAACACTAAGAATGGTCTTTATGTCATTTGAATACAAAAACTCCACAATAAAAAACCTXXXXXXXXXXAGATCATTGAAGATAATATAAATATTTCATTCTTGACAAAGGATTATTCATTTCCTTCTTGTCATTCACTATTGATGATTATTCTATAATATATTCCCTC
*
>Marker448676
CCCATGTTGGGGTAGTGGATTTTGGTGAGATATTTTCTCCTATGGCTAAGTGAACATCTATTACATTCATTTTATCTACTATTGCTACTTTTGATTTAGAXXXXXXXXXXAATTGATGATTAGATGCTAATCATTGTTCTATATGTTTATTATATTTTATTTATTGGTAATGATAAGGGAATGATTAGGGAACTTAAGAGTTAGTTATTT
CCCATGTTGGGGTAGTGGATTTTGGTGAGATATTTTCTCCTATGGCTAAGTGAACAACTATTACATTCATTTTATCTATTATTGCTACTTTTGATTTAGAXXXXXXXXXXAATTGATGATTAGATGCTAATCATTGTTCTATATGTTTATGATATTTTATTTATTGGTAATGATAAGGGAATGATTAGGGAACTTAAGAGTTAGTTATTT
* * *
>Marker130678
TGAATGCCATGAATATCATTTACTCTTAGAT-AAAAAGAGTATGAGATAATGAATTAAAATCTATAATAGAAAAATGATCACAAGAAGGGTATATAGGCATXXXXXXXXXXCTTTTTCACAATTAAATTATAGGTAATAGTGCACCTTATTCTATGTGGATAGATGAAAAATATTTTAGAATTGAGAAAATTAAAAGAAAAATAAAATTTT
TGAATGCCATGAATATCATTTACTCTTAGATAAAAAAGAGTATGAGATAATGAATTAGAATCTATAATAGAAAAATGATCACAAGAAGGGTATTTAGGCA-XXXXXXXXXXCTTTTTCACAATTAAATTATAGGTAATAGTGCACATAATTCTATGTGGATAGATGAAAAATATTTTAGAATTGAGAAAATTAAAAGAAAAATGAAATTTT
* * * * *
>Marker232518
TGATTGCTGCAAACCTTAAGTTCTCTGGCACCAATAATAAAGTTGTGATTATGCTAGTTTGCCACTCTAGTGTAAGCCTTTGAACTAAGTTAGGTTGTTAXXXXXXXXXXGGAAACCAAGATGATCAACCTTAGCCTTGGAAATCCAGCTCGAGCCTTCTTTCGACCTTCCTCTCCATTTCACCAAATATTCTTCATATTGCTTATTCCT
CGATTGCTGCAAACCTTAAGTTCTCTGGCACCAATAATAAAGTTGTGATTATGCTAGTTTGCCACTCTAGTGTAAGCCTTTGAACTAAGTTAGGTTGTTAXXXXXXXXXXGGAAACCAAGATGATCAACCTTAGCCTTGGAAATCCAGCTCGAGCCTTCTTTCGACCTTCCTCTCCATTTCACCAAATATTCTTCATATTGCTTATTCCT
*
>Marker162622
AATGACTCTTGCAAAGCTTTATCAAGAATGGCTTTATGAGTAGGTGATATATGAAATAACTCTAGAATAGAAATATGGGCAAGTGTTTTTCCAATATGCTXXXXXXXXXXGTCATAATTAGATGTTGGTTGTGGTGATGTGACATTAACAAGTCCTTGATCAATGAGATTTTGAATCATGTGTTTCAGTTTCATGTAGCTAGTAGTGTTA
AATGACTCTTGCAAAGCTTTATCAAGAATGGCTTTATGAGTAGGTGATATATGAAATAACTCTAGAATAGAAATATGGGCAAGTGTTTTTCCAATATGCTXXXXXXXXXXGTCATAATTAGATGTTGGTTGTGGTGATGTGACATTAACAAGTCCTTGATCAATGATATTTTGAATCATGTGTTTTAGTTTCATGTAGCTAGTAGTGTTA
* *
>Marker235825
ACCAGTAAGTAATGCTAAAAATAACCAATGCTCATTTGGTTGGTTTTAAATCAAAGCAATCTATGTAAATCAAAATAGAGGAACAATTAATAACTAAGTCXXXXXXXXXXACACAATCTCAGTCTAACCTCCTCAGTCGTATACAAAATCTAACATATATAGACAAGATCTGAGTTTCCTAATGGAATAGAACTTCTAAGCAACTAATTC
ACCAGTAAGTAATGCTAAAAATAACCAATGCTCATTTGGTTGGTTTTAAATCAAAGCAATCTATGTAAATCAAAATAGAGGAACAATTAATAACTAAGTCXXXXXXXXXXACACAATCTCAGTCTAACCTCCTATGTCGTATACAAAATCTAACATATATAGACAAGATCTGAGTTTCCTAATGGAATAGAACTTCTAAGCAACTAATTC
**
>Marker263601
TGCTTTCTAGTATAGAGTTTGAATTCTTTATAGTGTAGAATTTACATGCTTTCAAGTATAGAGTTCGAATGCTTTCTA-GATAGGATATCACTACTTTTTAXXXXXXXXXXGTTAGTTCACATTGACTTGTTTGGTCCATTTCCACATATTTTCTTTAGTAGGGCCAAATATGTTTTGACCTTTGTCAATGAATTTTCTAGTATACTTGGG
TGCTTTCTAGTATAGAGTTTGAATTCTTTATAGTGTAGAATTTGCATGCTTTCAAGTATAGAGTTCGAATGCTTTCTAGGATAGGATATCACTACTTTTT-XXXXXXXXXXGTTAGTTCACATTGACTTGTTTGGTCCATTTCCACATATTTTCTTTAGTAGGGCCAAATATGTTTTGACCTTTGTCAATGAATTTTCTAGTATACTTGGG
*
>Marker287105
GACTGCCAAACAATTATTTTCTACTGCAAAAAAAATCCCAAGACCGATAAGTGGTATTGTGTGATACAAAAGGTAGATTCATCAATCAACCAAGGAATTTXXXXXXXXXXTTGGGGTAAAATTTAATAGGATTCATAGTGGTGTAATTGTGTTTTGATTTTGGTGCCTATTTTTTCTAGAAATTATAAATTTATGCACCTGTTCCTAAGT
GACCGCCAAACAATTATTTTCTACTGCAAAAAAAATCCCAAGACCGATAAGTGGTATTGTGTGATACAAAAGGTAGATTCATCAATCAACCAGGGAATTTXXXXXXXXXXTTGGGGTAAAATTTAATAGGATTCATAGTGGTGTAATTGTGTTTTGATTTTGGTGCCTATTTTTTCTAGAAATTATAAATTTATGCACCTGTTCCTAAGC
* * *
>Marker348802
ATAGTCAATACTAGAAGAAAAAAGAAATAGATAGATGGAGAGATAAATAGATAGAGAGATAGACAAGGGGAGAGGGACAAGGAAAGATAGAGATAGAGAGXXXXXXXXXXCCTTGTTGCTTTAGGTGATGCACTTTGTCGACTTTGCTCGAAAAGTTTTCCCAAAAACAAATTGGAATGCATATATAAACAAGTCTACCTCTCAGGCATG
ATAGTCAATACTAGAAGAAAAAAGAAATAAATAGATGGAGAGATAAATAGATAGAGAGATAGACAAGGGGAGAGGGACAAGGAAAGATGGAGATAGAGAGXXXXXXXXXXCCTTGTTGCTTTAGGTGATGCACTTTGTCGACTTTGCTCAAAAGGTTTTCCCAAAAACAAATTGGAATACATATATAAACAAGTCTACCTCTCAGGCATG
* * * * *
>Marker225204
TATACAAGGTGCTTGTTTGCTAGGGTCTCACTGTTGGATGATTTTATTGTTGTTTTACCAATTTTTTTGATTTTTTTGCTATTTTTGACTCCCTTGCATTXXXXXXXXXXTTATAACTTTAGGACATCCTTTTTTGATAAGCTTTGAGATGGTTAAAGGCATGTTGCCTTCTCTCTTCTAGTAGCTCTAGGTCTTGTAGTATGGATACTC
TATACAAGGTGCTTGTTTGCTAGGGTCTCACTGTTGGATGATTTTATTGTTGTTTTACCAATTTTTTTTATTTTTTTGCTATTTTTGACTCCCTTGCATTXXXXXXXXXXTTATAACTTTAGGACATCCTTTTTTGATAAGCTTTGAGATGGTTAAAGGCATGTTGCCTTCTCTCTTCTAGTAGCTCTAGGTCTTGTAGTATGGATACTC
*
>Marker399872
AACACTATAAACATTTCAAGTCATCATGCTATATGCCATTTGAATCTAATCAAATCTCAATAAATTACAATAACAATTAATTTCCAATTAAGTGTTGATAXXXXXXXXXXTAGAAGATTCCTCTAGTCACAATCCTACTCATGGACAATTCTATTGTTAGGTATTGTAACCATATTGATATTGTTTTGATAATGGGTAGAAAACCATATT
AACACTATAAACATTTCAAGTCATCATGCTATATGCCATTTGAATCTAATCAAATCTCAATAAATTACAATAACAATTAATTTCCAATTAAGTGTTGATAXXXXXXXXXXTAGAAGATTCCTCTAGTCATAATCCTACTCATGGACAATTCTATTGTTAGGTATTGTAACCATATTGATATTGTTTTAATAATGGGTAGAAAACCATATT
* *
>Marker360076
AACCAAATGAAGGTCTGGGCAACAACCTCTGAACAACAATAAGAAGGAAAAGCTTTTAAGAAATAGGCTATCACCCAGCCATCACCATCCAGGAATAGGCXXXXXXXXXXAGGACAGTAAGAAATAAGGAAACTCTCCACAATTTCTTTTATAAAGAACAATCTATACCTTAATAATTTTGATCCTCTTCTCTTTACGGAAAGGCTTGTT
AACCAAATGAAGGTCTGGGCAACAACCTCTGAACAACAATAAGAAGGAAAAGCTTTTAAGAAATAGGCTATCACCCAGCCATCACCATCCAGGAATAGGCXXXXXXXXXXAGGACAGTAAGAAATAAGGAAACTCTCCACCATTTCTTTTATAAAGAACAATCTATACCTTAATAATTTTGATCCTCTTCTCTTTACGGAAAGGCTTGTT
*
>Marker360166
ACAAGGAATCCCAGTGCTGTTTTGAGAGTTCTGATTGGGGATTGATCTGAAGTTACTTAGCACATTGATAGCTTCAGAATTAGACCTTCAAGGACAGCAGXXXXXXXXXXCTTTACTGAGTAGTGTTGCATTCGTTCTATCATTTGTAATTATTCTTATTTATGCAAACATTTTATAACCCCTGGATGGTTTACCGCCAGTGTGGAGAAA
ACAAGGAATCCCAGTGCTGTTTTGAGAGTTCTGATTGGGGATTGATCTGAAGTTACTTAGCACATTGATAGCTTCAGAATTAGACCTTCAAGGACAGCAGXXXXXXXXXXCTTTACTGAGTAGTGTTGCATTCGTTCTATCATTTGTAATTATTCTTATTTATGCAAACATTTTATAACCCTTGGATGGTTTACCGCCAGTGTGGAGAAA
*
>Marker243574
ATAGCTCATAAAAATAATATAAGTTAAATATTTAATTTAACTTATATTTTTGAAATATAATCTCTTGGCTATTCTTTGAAGCCCAACTGCAGGTGCTAGAXXXXXXXXXXGAGCCATTCAAAGAAGGGAGGGAACTCTATTGAAGAAAAAGGTTTAGGCAACACTTCAGATGAGGACCGATGCATTCCTATGCCAACAACCACCATAGTT
ATAGCTCATAAAAATAATATAAGTTAAATATTTAATTTAACTTATATTTTTGAAATATAATCTCCTGGCTATTCTTCGAAGCCCAACTGCAGGTGCTAGAXXXXXXXXXXGAGCCATTCAAAGAAGGGAGGGAACTCTACTGAAGAAAAAGGTTTAGGCAACACTTCAGATGAGGACCGATGCATTCCTATGCCAACAACCACCATAGTT
* * *
>Marker410663
AACTATATCACCCTTGACCTTATGAGTTTGGTAATTATGACTTCTTATGACTTAAAGATGACAAATAATAAATGATAAGATCATGACTTTTACATTGCTTXXXXXXXXXXGACTGCAAATGTGCATTAGCACTTGGAGGAAATGAAAAACTCCTAAAACCTATGTGCAACAACACTTATTGACTCAAAAACTTAGACTAATATGTATAAT
AACTATATCACCCTTGACCTTATGAGTTTGGTAATTATGACTTCTTATGACTTAAAGATGACAAATAATAAATGATAAGATCATGACCTTTACATTGCTTXXXXXXXXXXGACTGCAAATGTGCATTAGCACTTGGAGGAAATGAAAAACTCCTAAAACCTATGTGCAACAACACTTATTGACTCAAAAACTTAGACTAATATGTATAAT
*
>Marker313984
CATATACAAAAAAATCTATAAGATTTGGCTATGGAGACAACTCCACCCAAGATCTAGAGGCTTAAAGGAAAACACAAAGGAATGAGAAGATCAATACAACXXXXXXXXXXATAATGCTTCCTAAGTCAACTTAGCATGTGTGAATAAGTCTAACTAAATAAATAGTTAGATAATGTGCCTTATTTACACAAGGGG-------------------AAACTAGATAGGAAA
CATATACAAAAAAATCTATAAGATTTGGCTATGGAGACAGCTCCACCCAAGATCTAGAGGCTTAAAGGAAAACACAAAGGAATGAGAAGATCAATACAACXXXXXXXXXX-------------------CTTAGCATGTGTGAATAAGTCTAACTAAATAAATAGTTAGATAATGTGCCTTATTTACACAAGGGGAAACTAGATAGGAAATACCAAACTAGATAGGAAA
*
>Marker500811
CATTACTTGTTGAGAGCCCGATATGGGGCCAGCTAATCAGCTAATCATGTCAACTAACATATTATCATTGTTTTCCACAAATCTTCATATTTCCTCCATTXXXXXXXXXXTTTTATACTGTAACTCAAGCAATACATGCTGAAACAACTCTGTTTACAGCCATCCCTTTCATCACCACAAGGATTTTTTATATTTAGTTTATGTCAAAGT
CATTACTTGTTGAGAGCCCGATATGGGGCCAGCTAATCAGCTAATCATGTCAACTAACATATTATCATTGTTTTCCACAAATCTTCATATTTCCTCCATTXXXXXXXXXXTTTTATACTGTAACTCAAGCAATACATGCTGAAACAACTCTGTTTACAGCCATCCCTTTCATCACCACAAGGATTTTTTATATTTAGTTTATGTCGAAGT
*
>Marker582017
AAAAAAA-TCTAAGTATGAAGATCTTTGGGTCAATCTCTATATTTGGTCTAAGTTAAATCACCATTTATTTTCCAAAAATATCCTCCATTATGGTAAAATCXXXXXXXXXXACCCATAATGCGGATCAAAAGATACATTTGTAAATAATAGCTTGACCAAAGCCAAATAGTTATTTGATGACTCTACTAGGGACTCTGATCTCATCATATT
AAAAAAAGTCTAAGTATGAAGATCTTTGGGTCAATCTCTATATTTGGTCTAAGTTAAATCACCATTTATTTTCCAAAAATATCCTCCATTATGGTAAAAT-XXXXXXXXXXACCCATAATGCGGATCAAAAGATACATTTGTAAATAATAGCTTGACCAAAGCCAAATAGTTATTTGATGACTCTACTAGGGACTCTGATCTCATCATATT
>Marker480707
ATCAAAAGGGACAAATTCACATCCACATGCATCATTCATGTATTCTGAATCATCACTATGAGAATAAATTTCAAATTTGAATGGTGGAAGAACCCCAATTXXXXXXXXXX-TTGATAATAATGAACTGCAATGATTTACAATTTCACTCTCAACATGATAAACCTTCACATTTATTTTTCTACACAATGTATAAAAGGAAAATAATTCATT
ATCAAAAGGGACAAATTCACATCCACATGCATCATTCATGTATTTTGAATCATCACTATGAGAAGAAATTTCAAATTTGAATGGTGAAAGAACCCCAATTXXXXXXXXXXTTTAATAATAATGAACTGCAATGATTTACAATTTCACTCTCAACAT-ATAAACCTTCACATTTATTTTTCTACACAATGTATAAAAGGAAAATAATTCATT
* * * *
>Marker495591
TCCATGGGACCAAATTGACCCTTATTACAAAATGAAATGGCTTAAGAGCCTTATGAGAAAACAAAAGAAAAGATGACCCTGCACTACAGAGAATGTGCT-CXXXXXXXXXXCCTTAAATTTGCTTGTCCTCAAGAAATGCAAACCAAGATGCTAAAAAATCATTGTGCCAATGTGATAAGTCATGTTGTATTGCACATAAAGCCTAGATCC
TCCATGGGACCAAATTGACCCTTATTACAAAATGAAATGGCTTAAGAGCCTTATGAGAAAACAAAAGAAAAGATGA-CCTGCACTACAGAGAATGTGCTCCXXXXXXXXXXCCTTAAATTTGCTTGTCCTCAAGAAATGCAAACCAAGATGCTAAAAAATCATTGTGCCAATGTGATAAGTCATGTTGTATTGCACATAAAGCCTAGATCC
>Marker166697
TTGAAGCTGGAGAGAAGACAAAACAATAAAAGCCACATCATTTGAGGACACAAATCATGACAAATTCAAAGAAGATCCATTAAAGAATCAAACAAGTTCGXXXXXXXXXXAATGAGCCACAATATTTCACAAACAAGATTATCTAGTCAACTAGAAAATGGAAAATCA-CAAAAAATATAGTTCTTGCATATAGGAAAATTAACTCATTTA
TTGAAGCCGGAGAGAAGACAAAACAATAAAAGCCACATCATTTGAGGACACAAATCATGACAAATTCAAAGAAGATCCATTAAAGAATCAAACAAGTTCCXXXXXXXXXX-ATGAGCCACAATATTTCACAAACAAGATTATCTAGTCAACTAGAAAATGGAAAATCACCAAAAAATATAGTTCTTGCATATAGGAAAATTAACTCATTTA
* *
>Marker771998
CTATAATTATGGCACCGCAGCTTCTCCATATGACCAACTGATTTATTGTGCCATGGTTTATACCTGGATCATGTCCTTCCTAGTGTCCCAAATAACCATTXXXXXXXXXXTCCAAATCTCACACTAATCCAAGCATAATTTAACTATGACATGCATACACAAATTACCCAAATCGAAATCCATTCAAATAAATTTATAAATTTCCAAATG
CTATAATTATGGCACCGCAGCTTCTCCATATGTCCAACTGATTTATTGTGCCATGGTTTATACCTGGATCATGTCCTTCCTAGTGTCCCAAATAACCATTXXXXXXXXXXTCCAAATCTCACACTAATCCAAGCATAATTTAACTATGACATGCATACACAAATTACCCAAATCGAAATCCATTCAAATAAATTTATAAATTTCCAAATG
*
>Marker361588
TGAATCAGGAGGATAATTCATCACATCTGCAATTGCCTCAGCTGTCTTCTTCTTTTCTA-TTTTTTTCTCCTTGTAGCTATCAAAGAGGGCCTTCATCTCTXXXXXXXXXXTTGGCAATTAAATTCTGCTTATGGAGATTATTTAATCCCCGAATGCTTCACGAGACCAGCTTCATTTTTTAGATTTTGGTGAGCAGCCCACCGTTTACAA
TGAATCAGGAGGATAATTCATCACATCTGCAATTGCCTCAGCTGTCTTCTTCTTTTCTATTTTTTTTCTCCTTGTAGCTATCAAAGAGGGCCTTCATCTC-XXXXXXXXXXTTGGCAAGTAAATCCTGCTTATGGAGATTATTTAATCCCCGAATGCTTCATGAGACCAGCTTCATTTTTTAGATTTTGGTGAGCAGCCCACCGTTTACAA
* * *
>Marker255931
TGGTTTTTGTTGTAGAATGTCTCCAGGTCTTTAGGTATGTATCCAGGAGGATTTCTTAGTCACAGTTGGGTATTCTCCTTTGCCATGTTTGATTGCACG-AXXXXXXXXXXGGAGCCATTCCTTTCAGCTTCACATAATTTAAACAAATAAACATTTACCAGTGGTTTAGGGGAAGGACCATTGTTTCTGTGTATGTATACTTGCACATTT
TGGTTTTTGTTGTAGAATGTCTCCAGGTCTTTAGGTAT-TATCCAGGAGGATTTCTTAGTCACAGTTGGGTATTCTCCTTTGCCATGTTTGATTGCATGAAXXXXXXXXXXGGAGCCATTCCTTTTAGCTTCACATAATTTAAACAAATAAACATTTACCAGTGGTTTAGGGGAAGGACCATTGTTTCTGTGTATGTATACTTGCACATTT
* *
>Marker761884
CTTTGGCTACTGATCTCTTTGGCATCTTGCTTAGCCCATTTGGGTTAATGCGCTAGTGAGAATGTAGCTATTGTCTTTAGTTTCTATTTTAGTATTCAGTXXXXXXXXXXTGATGTGAACAAATCTTTGTTTCTATAGAATATGTGAACGGGAGTGAGAGATGAATCTGTTATAGTGTTTTTTTCTCTCTAGTGGAGTGTTTATTTTTCC
CTTTGGCTACTGATCTCTTTGGCATCTTTCTTAGCCCATTTGGGTTAATGCGCTAGTGAGAATGTAGCTATTGTCTTTAGTTTCTATTTTAGTATTCAGTXXXXXXXXXXTGATGTGAACAAATCTTTGTTTCTATAGAATATGTGAACGGGAGTGAGAGATGAATCTGTTATAGTGTTTTTTTCTCTCTAGTGGAGTGTTTATTTTTCC
*
>Marker440710
AGGAAAGAAAGGAACAGTAAAGTCAAAGACCAATGATTTACATTGTTACCATTGCAGAAAACCAGACCATATGGCATGGTTTTGCAAATTTGGGGCAGCTXXXXXXXXXXTGAAGGGTGTTTAGGTGAGTAAAATGGATGAACTTCACCTCTATAGTGTATAAGTGTGCTGACAATTTGATTGGATCCAACTTGATGAAGCTTTAGAGTT
AGGAAAGAAAGGAACAGTAAAGTCAAAGACCAATGATTTACATTGTTACCATTGCAGAAAACCAGACCATATGGCATGGTTTTGCAAATTTGGGGCAGCTXXXXXXXXXXTGAAGGGTGTTTAGGTGAGTAAAATGGATGAACTTCACCTCTATAGTGTATAAGTGTGTTGACAATTTGATTGGATCCAACTTGATGAAGCTTTAGAGTT
*
>Marker239559
TGTTAGTTTGGAGTAGAATTTCTAGGTTGCCCTCAGACCGTCAACTCTTTCTTTCTTTTAGTTAGTAATAGGAAAGTTGAACTTTGAGGGCCTCTAAAAAXXXXXXXXXXTATATTTGTCTGACCAGAAGATATTCCAAGAGGTTTCATAGGCAAACCCTATAACTTAAACATGTTATATTTGCATCTAAAGAATCTATGAAGGAACTAC
TGTTAGTTTGGAGTAGAATTTCTAGGTTGCCCTCAGACCGTCAAGTCTTTCTTTCTTTTAGTTAGTAATAGGAAAGTTGAACTTTGAGGGCCTCTAAAAAXXXXXXXXXXTATATTTGTCTGACCAGAAGATATTCCAAGAGGTTTCATAGGCAAACCCTATAACTTAAACATGTTATATTTGCATCTAAAGAATCTATGAAGGAACTAC
*
>Marker484859
AGAAGATGAATTAGGCGCTCGGGTTAGTAACATGATACATTTTATGGAGACTGGTCAACTACCTAATATGCTCTCTCCTAAAAAGAGAAGATATTATAGAXXXXXXXXXXGAAGGAATGCAACCTTACCTTTAAGTCCCATATTGATAGAAGAGCCTTTTTCTTAGTGGGGTCTAGATTTTGTAGGAATGATTAATCCAATTTCAAGTTC
AGAAAATGAATTAGGCGCTTGGGTTAGTAACATGATACATTTTATGGAGACTGGTCAACTACCTAATATGCTCTCTCCTAAAAAGAGAAGATATTATAGAXXXXXXXXXXGAAGGAATGCAACCTTACCTTTAAGTCCCATATTGATAGAAGAGCCTTTTTCTTAGTGGGGTCTAGATTTTGTAGGAATGATTAATCCAATTTCAAGTTC
* *
>Marker63779
AGTGGTCCAAACCATTAGATGAAGTTATAAATTCCCTCATGGATGCAGTTGTGGTGCAGTCACGGATAGGAAGGTCCACAAAGTGAATAGTCCAGACCGTXXXXXXXXXXCATAGGGATCTATTACATGAATTTATATCATCTCCGGGTCACAAGATTCCTCCGTGTCGACCAAGTAGATTACAAACTCCAATGAAAGAGATGTAACATG
AGTGGTCCAAACCATTAGATGAAGTTATAAATTCCCTCATGGATGCAGTTGTGGTGCAGTCACGGATAGGAAGGTCCACAAAGTGAATAGTCCAGACCGTXXXXXXXXXXCATAGGGATCTATTACATGAATTTATATCATCTCTGGGTCACAAGATTCCTCCGTGTCGACCAAGTAGATTACAAACTCCAATGAAAGAGATGTAACATG
*
>Marker476471
TCTGTAGCAGAATTACTTTGATGGTCCCTTACCTGGCCATTCTTATGGTGTGGTGCCTACTTCTACCTGTATCACAAGTAGTGCTGCAGCTATCCTAAAAXXXXXXXXXX-----------AATAGACAGTTTATATTTTGCATATTTTCCTTCCAAAAAATGAGTTTTGGTTATGTTACTGTGTATGTGTCCCATCCGGGTAAACCCTGGGTATGTGCCT
TCTGTAGCAGAATTACTTTGATGGTCCCTTACCGGGCCATTCTTAAGGTGTGGTGCCTACTTCTACCTGTATCACAAGTAGTGCTGCAGCTATCCTAAAGXXXXXXXXXXTTATCCTTACAAATAGACAGTTTATATTTTGCATATTTTCCTTTCAAAAAATGAGTTTTGGTTATGTTAC----TATGTGTCCCATCCAGGTAAACCCTGGGTA-------
* * * * *
>Marker121313
ATCTTCATATGCCGGCAACATGTAGACTATTATGGGCTTTGACATAATTACATGAAAGATATAGCTTTGAAGTGCCTTCCATAAATCCACTATTAAAACTXXXXXXXXXXAGGTGCTGCAAACTCTATAGGCTCATACTAAATGTTGAATGCTCTGCTCTGTGAGTTCTGATAGCGATAACTTTCTACAGACAATAGCAAACCTCATGAA
ATCTTCATATGCCAGCAACATGTAGACTGTTATGGGCTTTGACATAATTACATGAAAGATATAGCTTTGAAGTGCCTTCCACAAATCCACTATTAAAACTXXXXXXXXXXAGGTGCTGCAAACTCTATAGGCTCATACTAAATGTTGAATGCTCTGCTCTGTGAGTTCTGATAGCGATAACTTTCTACAGACAATAGAAAACCTCATGAA
* * * *
>Marker469738
TTTGTATGCATTCTCTTACTTCGCAACATAAATTTCCTTAGCTAGATTGAGATTAACAAAATATGTTTTAACTTGGTTTGAAATTCTCTTGTATTCTAT-G---XXXXXXXXXXTGAAGCATGTGCTCATGCTCACTATCATGAATTAGATAGTCCTCCATGCTCTTCAAGGATGAATGGAACCAAAGACAAGACAAAGAACGTAAATTCCACA
TTTGTATGCATTCTC----TTCGCAACATAAATTTCCTTAGCTAGATTGAGATTAACAAAATATGTTTTAACTTGGTTTGAAATTCTCTTGTATTCTATGGATTXXXXXXXXXXTGAAGCATGTGCTCATGCTCACTATCATGAATTAGATAGTCCTCCATGCTCTTCAAGGATGAATGGAACCAAAGACAAGACAAAGAAGGTAAATTCCACA
*
>Marker427451
ACTCAAAGCAAGGTGTCACAAAACCAATGGGTAGTGGATAGGTCACAATTTCAAATGGAAGAGCTATGTGATGTGTCAAAGAATAAGTAATGGCATCTCGXXXXXXXXXXAGGGATTAAACTAGCTGGTGAAGAGAAAGGGATGAAATTAGTTGGACGACAGATAAGTGGAACACTATTGAAAAGAGAGGTAGTGAGGACACTAGAAGAA
ACTCAAAGCAAGGTGTCACAAAACCAATGGGTAGTGGATAGGTCACAATTTCAAATGGAAGAGCTATGTGATGTGTCAAAGAATAAGTAATGGCATCTCGXXXXXXXXXXAGGGATTAAACTAGCTGGTGAAGAGAAAGGGATGAAATTAGTGGGATGACAGATAAGTGGAACACTATTGAAAAGAGAGGTAGTGAGGACACTAGAAGAA
* *
>Marker206122
TCTTTGCATTCAGTTCAAAAAG-TTAGCTTCAATCTCATCAAGGTCATCATCGTATTCCACAACATACTTCTGAGATCTTGAATTCTTTTCTGAAATGCTAXXXXXXXXXXTCTTTAGGGCTTCATACCTCACCTTTAGGTTTTGTAATTTGGCACTCTTTACATAATCATCTCCTTCATATAATTTTTTCAACTTAACCTAGATCTCATG
TCTTTGCATTCAGTTCAAAAAGTTTAGCTTCAATCTCATCAAGGTCATCATCGTATTCCACAACATACTTCTGAGATCTTGAATTCTTTTCTGAAATGCT-XXXXXXXXXXTCTTTAGGGCTTCATACCTCACCTTTAGGTTTTGTAATTTGGCACTCTTTACATAATCATCTCCTTCATATAATTTTTTCAACTTAACCTAGATCTCATG
>Marker216795
AAAACTTTCTGAAAAGGAATGATGGTGGCAACTAAGGCTCTTTTTCAAATGCCTTAGTTTATTTTGATATTGTATATGTAATTTGAATTTTGTTTTTGATXXXXXXXXXXCCATGGATTCAATAAATTCATCCAACTTTTTGAAATTCTCATCCTTGTCAACAGCAGTAGTAGCCCCCAGAACCTGCAAGATAGAAAGATTAGATAGAAT
AAAACTTTCTGAAAAGGAATGATGGTGGCAACTAAGGCTCTTTTTCAAATGCCTTAGTTTATTTTGATATTGTATATGTAATTTGAATTTTGTTTTTGATXXXXXXXXXXCCATGGATTCAATAAATTCATCCAACTTTTTGAAATTCTCATCCTTGTCAACAGCAGCAGTAGCCCCCAGAACCTGCAAGATAGAAAGATTAGATAGAAT
*
>Marker328830
ACAGAGCCCAAGATGAATACCCTTGTTGCTACTTTTTTCAACAAGAAATGAGGAGAAAATCCATGGATGAAGGTTTGAAGGATGCATTCCATGTTTGAGAXXXXXXXXXXTTATGGTTGATTGATATAGGTGTTCCCTACCATATGACTCCTCACAAGGAGTGTTTTTCTTAGTAGAGAGCATGTAAGGGTGGTGAGATGTTTGTTTCTT
ACAGAGCCCAAGATGAATACCCTTGTTGCTACTTTTTTCAACAAGAAATGAGGAGAAAATCCATGGATGAAGGTTTGAAGGATGCATTCCATGTTTGAGAXXXXXXXXXXTTATGGTTGATTGATATAGGTGTTCCCTACCATATGACTCCTCACAAGGAGTGTTTTTCTTAGTAGAGAGCATGTAATGGTGGTGAGATGTTTGTTTCTT
*
>Marker339294
TCTTATACAAAACCAACTTTTACCATTTGAGTATTAGAATAAATTACATATTTGAAAACTAGAAACAGAATCCTACATTTCATATTTTTACATCATCTTAXXXXXXXXXXAGTTGCTTGCCTAAAAATTTAATTAAGCCAAGAGCGATTAGAGGAGGAATTGTCTAGATAGTTAGAGAAGAAAGAAGCAGAGTTGCTCCAAGAGATCGTG
TCTTATACAAAACCAACTTTTACCATTTGAGTATTAGAATAAATTACATATTTGAAAACTAGAAACAGAATCCTACATTTCATATTTTTACATCATCTTAXXXXXXXXXXAGTTGCTTGCCTAAAAATTTAATTAAGCCAAGAGCGATTAGAGGAGGAATTGTCTAGATAGTTAGAGAAGAAAGAAGCAGAGTTGCTCCAAGAGATCATG
*
>Marker321676
ATGTGATGTCAAAGTGGAAATCTTAATGTGGCCCCTGAATGAAATTATTTAATCATTTTGATAAAGGCAAAGGCAAGTTAAATGTTTTTACTTTGCAAAAXXXXXXXXXXAATCATGGAAGTTGGATTGAGAATCTTCAAAAGTCATTGTATTGTTAAAGTGACAAAGCTGGAAGTGAACTTGAGAAGTGTGGTTATTGTTAGTTATGGT
ATGTGATGTCAAAGTCGAAATCTTAATGTGGCCCCTGAATGAAATTATTTAATCATTTTGATAAAGGCAAAGGCAAATTAAATGTTTTTACTTTGCAAAAXXXXXXXXXXAATCATGGAAGTTGGATTGAGAATCTTCAAAAGTCATTGTATTGTTAAAGTGACAAAGCTGGAAGTGAACTTGAGAAGTGTGGCTATTGTTAGTTATGGT
* * *
>Marker49481
GATCTTGAAGAAGGTTGGCCACAAACCAAAGATCATTGAATGATGAGTTATTAAGCTCCACAAGTCAAGGAATGCTCTGCAAGTCTTCTCCTTTAGCTAAXXXXXXXXXXAAATTGAACTGCCTGAACTGAACTAGAAAATGAAAAGAAACAAACTAAACTACAAATGAACTAAAATGCAAATATTTTTTGGTTGATGCAAGATTGTTCT
GATCTTGAAGAAGGTTGGCCACAAACCAAAGATCATTGAATGATGAGTTATTAAGCTCCACAAGTCAAGGAATGCTCTGCAAGTCTTCTCCTTTAGCTAAXXXXXXXXXXAAATTGAACTGCCTGAACTGAACTAGAAAATGAAAAGAAACAAACTAAACTACAAATGAACTGAAATGCAAATATTTTTTGGTTGATGCAAGATTGTTCT
*
>Marker433661
ACTATACTATCATAATTTTTGACAAAGAAAAAATAGTAAACTAATAATCCCTAAGAAACCCCATAGGTTATTAAGGGTCCTAGGTATTTTTCATTCTACTXXXXXXXXXXTTCTAGCTATACTCCATGATCAAGATATAATGTATATTGCTCTCACTAAGCATAAGCTAATGGAAATGGAGGGGATGAGAGGATATTTGGATAGCATAAG
ACTATACTATCATAATTTTTGACAAAGAAAAAATAGTAAACTAATAATCCCTAAGAAACCCCATAGGTTATTAAGGGTCCTAGGTATTTTTCATTCTACTXXXXXXXXXXTTCTAGCTATACTCCATGATCAAGATATAATGTAGATTGCTCTCACTAAGCATAAGCTAATGGAAATGGAGGGGATGAGAGGATATTTGGATAGCATAAG
*
>Marker111543
AGAAATACAAAATCATATACATACATAGATACATAGGCAAAATACACATAATTGAACACAAGGCTGCTTAATCAGTAGAACGCTGAAATGGGGTAATTCGXXXXXXXXXXCCCAGTGGTGGTGACGTGCCAGAGCCAGGTTAGACATGTTCATTAAGAAAGGGAATCTTTGAAATTATGTAGTAGGAACAGAAACCAATGCTAGCTCTGA
AGAAATACAAAATCATATACATACATAGATACATAGGCAAAATACACATAATTGAACACAAGGTTGCTTAATCAGTAGAACGCTGAAATGGGGTAATTCGXXXXXXXXXXCCCAGTGGTGGTGACGTGCCAGAGCCAGGTTAGACATGTTCATTAAGAAAGGGAATCTTTGAAATTATGTAGTAGGAACAGAAACCAATGCTAGCTCTGA
*
>Marker223478
TATAATGGACTGGGCATTGTAACAAGAGGCATCATGACTCCATTAGTCTGCTGCTAAGTAGGGTATGCAAGATATGTAGGGTATGCAGGATATGTAGGGTXXXXXXXXXXAGGTGATAAGTCATGGAAGGATCTATAGGCACTTTGAACCTATCTTTAACGGCTTTCTCTAAGGCATCCCATGAACTGATTGATGCTTGAGCAAGGCTAA
TATAATGGACTGGGCATTGTAACAAGAGGCATCATGACTCCATTAGTCTACTGCTAAGTAGGGTATGCAAGATATGTAGGGTATGCAGGATATGTAGGGTXXXXXXXXXXAGGTGATAAGTCATGGAAGGATCTATAGGCACTTTGAACCTATCTTTAATGGCTTTCTCTAAGGCATCCCATGAACTGATTGATGCTTGAGCAAGGCTAA
* *
>Marker189023
AAAGTAAATGGAATAGTATGCATCCACAAGATTACACAAGACTCGGATTTATGTGGGAAACCCTTTCAAGAGAAAACCCACCACCAAACAAGACGTTCATXXXXXXXXXXATGGAATACCAATAGTCATACAACTATAATCTGACCATACATGATGTCAACATACCACATAAATCACCAAGTATGACGTCTCCACATGGATAATCACCTT
AAAGTAAATGGAATAGTATGCATCCACAAGATTACACAAGACTCCGATTTATGTGGGAAACCCTTTCAAGAGAAAACCCACCACCAAACAAGACGTTCATXXXXXXXXXXGTGGAATACCAATAGTCATACAACTATAATCTGACCATACATGATGTCAACATACCACATAAATCACCAAGTATGACGTCTCCACATGGATAATCACCTT
* *
>Marker534026
TTAGCACATACAAAAATTCTTGTTAGTTCTTGGTTATGTAAGTATGACAAACTATTTTGATCTCCAATTGGACTAAGACATCAACTAGAAAATAGACCAAXXXXXXXXXXTGCAATGAACTAGAACGAAAATGAAGGCAACATTACCACAAAATAGAAGACGCAAGATTTACCCTAGAGAACGTGAGTTCCGGGAGAAAACTTTAGTAAA
TTAGCACATACAAAAATTCTTGTTAGTTCTTGGTTATGTAAGTATGACAAACTATTTTGACCTCCAATTGGACTAAGACATCAACTAGAAAATAGACCAAXXXXXXXXXXTGCAATGAATTAGAACGAAAATGAAGGCAACATTACCACAAAATAGAAGACGCAAGATTTACCCTAGAGAACGTGAGTTCCGGGAGAAAACTTTAGTAAA
* *
>Marker378243
CATCTTCTGCATTTTAACTGTGTTACCGATTTATAAGTTCCAATTTGATTGGAGATAAACACAAATAATTTAAGCTATTATGCACCAAAATGATCATATTXXXXXXXXXXATTTACAAATTCCAAGTTGATGGGACAAAACTTGAGATAAATGTAAAGTAGTAAACAAATTAATATGGAGTAAACCATGCCATTAGGCATATATGATACC
CATCTTCTGCATTTTAACTGTGTTACCGATTTATAAGTTCCAATTTGATTGGAGATAAACACAAATAATTTAAGCTATTATGCACCAAAATGATCATATTXXXXXXXXXXATTTACAAATTCCAAGTTGATGGGACAAAACTTGAGATAAATGTAAAGTTGTAAACAAATTAATATGGAGTAAACCATGCCATTAGGCATATATGATACC
*
>Marker661051
TTTGCTTCTTATCCCAAGAAAAAGGTAGGAACAAAATAACTCATGCTTATAGACAAAGCCTCTTTAGACTAATTAGGTGGTCCAAGATATTAAAGGTCATXXXXXXXXXXATTATTAATAGTTCTAGTCTTCCTTGAGTGGAAATGTTTGGTATCAAAGATCTTTGAAAATCCTTTGTAAGGGTATCTATACTATTAGAGACTTAATATT
TTTGCTTCTTATCCCAAGAAAAAGGTAGGAACAAAATAACTCATGCTTACAGACAAAGCCTCTTTAGACTAATTAGGTGGTCCAAGATATTAAAGGTCATXXXXXXXXXXATTATTAATAGTTCTAGTCTTCCTTGAGTGGAAATGTTTGGTATCAAAGATCTTTGAAAATCCTTTGTAAGGGTATCTATACTATTAGAGACTTAATATT
*
>Marker253011
TTATTCAACTCTCAAGCTTCTAGTGCCAAGATGTCAATCAAGCAAAAACTCTTTAGCTTGGAGATGAATGAACGTGAAAGTATTGTTCAACAAATTAATAXXXXXXXXXXCATTTTTGTTCTTGTGGATAGTGGAGTATGTTTAGATCCATAGGAAGTGTGTTGTATATGTGGATAGTTGAGTATGCCTCGATTCGCAGGCTTGGAGGTG
TTATTCAACTCTCAAGCTTCTAGTGCCAAGATGTCAATCAAGCAAAAACTCTTTAGCTTGAAGATGAATGAACGTGAAAGTATTGTTCAACAAATTAATAXXXXXXXXXXCATTTTTGTTCTTGTGGATAGTGGAGTATGTTTAGATCCATAGGAAGTGTGTTGTATATGTGGATAGTTGAGTATGCCTCGATTCGCAGGCTTGGAGGTG
*
>Marker462832
ATGTTCATGTTCATAGATTATAGATAAGAGGACTATCAAAAATAGATATCCAATACCCAAGATCAATGAGCTAATAGATGAGCTTCATGGAGTAGTATACXXXXXXXXXX-------------GAAGATCATTTGTAGCATTTGGATACAATTTGGGGAATTCTTGAACAAGAAGAACATTTTGCTAAGGAGTCCAAATGTGAATTTGAAGTTATTAAAGTAT
ATGTTCATGTTCATAGATTATAGATAAGAGGACTATCAAAAATAGATATCCAATACCCAAGATCAATGAGCTAATAGATGAGCTTCATGGAGTAGTATACXXXXXXXXXXTAGAAAATCTTGGGAAGATCATTTGTAGCATTTGGATACAATTTTGGGAATTCTTGAACAAGAAGAACATTTTGCTAAGGACTCCAAATGTGAATTT------------G-AT
* *
>Marker356193
ACTTGGAACTAAAATAAATGTTCACTTCATTGTGTTAAATGGATCCCCTAGGATCTCTACATGTTCAACATTGATGACAATCATACTGACTCTGTTTTCCXXXXXXXXXXCCAACTCAACCATTACATGTTGGTGGAACTGGAACAAACACCCTTTTTAAGCTCCCTCAAACATCCTTACATAAGTGATCTCTTATGTTCATTTGATGGG
ACTTGGAACTAAAATAAATGTTCACTTCATTGTGTTAAATGGATCCCCTAGGATCTCTACATGTTCAACATTGATGACAATCATACTGACTCTGTCTTCCXXXXXXXXXXCCAACTCAACCATTACATGTTGGTGGAACTGGAACAAACACCCTTTTTAAGCTCCCTCAAACATCCTTACATAAGTGATCTCTTATGTTCATTTGATGGG
*
>Marker343983
ACACAAATTCTTGCACGTGGTTGTAATAGTAGGTGACAAGAGATATTGGATTCCAAAAGTGGATTCATGCTTAACACCTACTACATCAATGTCAAAGAAGXXXXXXXXXXGGCGATTGATCTAGGAGGATTCACCAAACCAAGCACCTGTGGAAACACTTAGGCCATCCTCACGGCCTGTGGCAATTGTGGGGCTACTTCTCGGGACTAT
ACACAAACTCTTGCACGTGGTTGTAATAGTAGGCGACAAGAGATATTGGATTCCAAAAGTGGATTCATGCTTAACACCTACTACATCAATGTCAAAGAAGXXXXXXXXXXGGCGATTGATCTAGGAGGATTCACCAAACCAAGCACCTGTGGAAACACTTAGGCCATCCTCACGGCCTGTGGCAATTGTGGGGCTACTTCTTGGGACTAT
* * *
>Marker256059
ACACCCTCCAAGTCTCTGCTTATTACAGAAGAAAAGGAGGAGAGGAAATTGCATGGAGCTCACTGTTTATGTTTTACCAAGGTCATAACTATAAGAATACXXXXXXXXXXAGGGATGCATCCCCCACTAAAACATGCCAGTTTGGGGGACGGGAACATTCCCGGGGCTCGGAGACGCCACTCCATTCCCCTCCCCCCACTGGGCCACCAG
ACACCCTCCAAGTCTCTGCTTATTACAGAAGAAAAGGAGGAGAGGAAATTGCATGGAGCTCACTGTTTATGTTTTACCAAGGTCATAACTATAAGAATACXXXXXXXXXXAGGGATGCATCCCCCACTAAAACATGCCAGTTTGGGGGACGGGAACATTCCCGGGGCTCGGAGATGCCACTCCATTCCCCTCCCCCCACTGGGCCACCAG
*
>Marker296718
CTTTGAAGTTATACGCCCAGCCAAAGATAAACCCACTAACAAACTGCCACGCCATTATTTTTAAATTCGCTGAAATCATTATTCTGACTCTGAGTGCTATXXXXXXXXXXGCAAAGCTATAAGAGACGAAGAGCAGCAAAGGTGGGAAACCAAAGAAAAACTAGAATTTATAATGAATGCATCACACTCGCACGGGCATCCTATGAGGTC
CTTTGAAGTTATACGCCCAGCCAAAGATAAACCCACTAACAAACTGCCACGCCATTATTTTTAAATTCGCTGAAATCATTATTCTGACTCTGAGTGCTATXXXXXXXXXXGCAAAGCTATAAGAGACGAACAGCAGCAAAGGTGGGAAACCAAAGAAAAACTAGAATTTATAATGAATGCATCACACTCGCACGGGCATCCTATGAGGTC
*
>Marker119016
ATGGTCTTGGGACTTTCTTTTTTTTATCACATTTTTCCTGTTTAGTGTGCATGTTATAGGCTCATTTGCTTGCTAACGGTAAAATGTGAGATATAATGTT-XXXXXXXXXXCTCTATTGCATGACTCATGCAATGTGCTCATCCTCTTTTAGTGCTTGTTCAATATTTGCGTACGAAGCCCCTATGTTGTTTGAGAGCACAGAAATGATAA
ATGGTCTTGGGACTTTC-TTTTTTTATCACATTTTTCCTGTTTAGTGTGCATGTTATAGGCTCATTTGCTTGCTAATGGTAAAATGTGAGATATAATGTTCXXXXXXXXXXCTCTATTGCATGCCTCATGCAATGTGCTCATCCTCTTTTAGTGCTTGTTCAATATTTGCGTACGAAGCCCCTATGTTGTTTGAGAGCACATAAATGATAA
* * *
>Marker437486
ATGCAATCCAGTCCCACGGGATGTTTGGCAACCTCAAGTGGCACCTTCCTCATCGTCTTGAATACTATATTTGCAATATCCTTCAACACCTTCCCCTCGTXXXXXXXXXXTCTCCTCATATCCAGAAAATGCAGAAGCATAGCTTCCTTTTCTTTGAGCCACCCAGCGCAGATCACAAGGGTCAACATGATCGAAGACTGGAATGATTTT
ATGCAATCCAGTCCCACGGGATGTTTGGCAACCTCAAGTGGCACCTTCCTCATCGTCTTGAATACTATATTTGCAATATCCTTCAACACCTTCCCCTCGTXXXXXXXXXXTCTCCTCATATCCAGAAAATGCAGAAGCATAGCTTCCTTTTCTTTGAGCCACCCAGCGCAGATCACAAGGGTCAACATGATCGAAGACGGGAATGATTTT
*
>Marker536096
ATCCTTGATTTTAGTAATCCACAAGACTTAATTGCAGCCTCTGCATCGGTTAGGTTCTTGTATAATACATTGGCTAGGGGGTATCTTTGAGGCTAACAAGXXXXXXXXXXTTATTTGTGCAAAAGAGACATGCAACATAACTTGTTTGATAGTTACTGACAGTGGAAAAAAAATCCTCTGGAAGTTCTATTATGTTTATCAGAAGTATGG
ATCCTTGATTTTAGTAATCCACAAGACTTAATTGCAGCCTCTGCATTGGTTAGGTTCTTGTATAATACATTGGCTAGGGGGTATCTTTGAGGCTAACAAGXXXXXXXXXXTTATTTGTGCAAAAGAGACATGCAACATAACTTGTTTGATAGTTACTGACAGTGGAAAAAAAATCCTCTGGAAGTTCTATTATGTTTATCAGAAGTATGG
*
>Marker395668
AACCTCCTCAAAAGTTGTCCTTGAAAGATAGGAACATGAAGAACTCCTAAAGCATGTAGA---TGTAAAATCTACTGAAAAAGTATCAGTGTCTATTGGAATTXXXXXXXXXXATTGATCAATTGAATAAGGTAGAAGGTTTCCTCCAAGTGTCTATATGGTATGTGTTCTATCTTACCAAATTGCATGGGTAACCAGCTGCTCCATTTGTCT
AACCTCCTCAAAAGTTGTCCTTGAAAGATAGGAACATGAAGAACTCCTAAAGCATGTAGATGTTGTAAAATCTACTGAAAAAGTATTGGTGTCTATTGG-A--XXXXXXXXXXATTGATCAATTGAATAAGGTAGAAGGTTTCCTCCAAGTGTCTATATGGTATGTGTTCTATCTTACCAAATTGCATGGGTAATCAGCTGCTTCATTTGTCT
** * *
>Marker413118
CCAAATGTCCAAGATGTCTAAATTGGCTTATCAGGATGCCAAATTTGTGACACTGGTTCACATGGTGGGGTCTTTATTACAAACATGAAATCACAATATAXXXXXXXXXXTTTTCCTAGCATTTCCAAAAGGCAATCTGAATTGTTCCAACTTCTGATCAATCAACTAGTATCCCTTTTCAGCAAGAATTGTGAAATCTCCAAAGCATAA
CCAAATGTCCAAGATGTCCAAATTGGCTTATCAGGATGCCAAATTTGTGACACTGGTTCACATGGTGGGGTCTTTATTACAAACATGAAATCACAATATAXXXXXXXXXXTTTCCCTGGCATTTCCAAAAGGCAATCTGAATTGTTCCAACTTCTGATCAATCAACTAGTATCCCTTTTCAGCAAGAATTGTGAAATCTCCAAAGCATAA
CCAAATGTCCAAGATGTCTAAATTGGCTTATCAGGATGCCAAATTTGTGACACTGGTTCACATGGTGGGGTCTTTATTACAAACATGAAATCACAATATAXXXXXXXXXXTTTCCCTGGCATTTCCAAAAGGCAATCTGAATTGTTCCAACTTCTGATCAATCAACTAGTATCCCTTTTCAGCAAGAATTGTGAAATCTCCAAAGCATAA
* * *
>Marker100248
AGTGGAAAGGTAACTTGCTCAAGACTCACATGTAGAGGCGAGTGAACACTCATTAACTAGGACACCTAAGTAGTCTTAACTCCATGTGGAATTATCCATGXXXXXXXXXXTAGAGTTTCAAAATGTGGATCCTAGTTGCATACACCATAGATACAATGGTATTGTAAATTTGTCAAAAATTGCATACCCTTTCAATTTCATGTTATGTTT
AGTGGAAAGGTAACTTGCTCAAGACTCACATGTAGAGGTGAGTGAACACTCATTAACTAGGACACCTAAGTAGTCTTAACTCCATGTGGAATTATCCATGXXXXXXXXXXTAGAGTTTCAAAATGTGGATCCTAGTTGCATACACCATAGATACAATGGTATTGTAAATTTGTCAAAAATTGCATACCCTTTCAATTTCATGTTATGTTT
*
>Marker138966
TATCCAAGGTGCCACCAAAGTGGTTTTCACCATAGGATGGATTATTTCTCTTTACTATTTTGATGATTTTTTTAATTTATTTAATTTTTTATCATCCTTCXXXXXXXXXXCTTCAGACCTTCTCTCAGCTTCATCATAAGCCTTAATTTTGATAGAATGTTTTTTGTTAATAACCACGATAGAGTATCTCAATTGTTTAACCAATCTTAA
TATCCAAGGTGCCACCAAAGTGGTTTTCACCATAGGATGGATTATTTCTCTTTACTATTTTGATGATTTTTTTAATTTATTTAATTTTTTATCATCCTTCXXXXXXXXXXCTTCAGACCTTCTCTCAGCTTCATCATAAGCCTTAATTTTGATAGAATGTTTTTTGTCAATAACCACGATAGAGTATCTCAATTGTTTAACCAATCTTAA
*
>Marker133075
TGTTTTTTAGAAAAATGTATGGCACTAGGGTGAGTGTGAAATCAAAACCTACAGCAAAAGACCAGATAGATCCATATGTTTCAAGTGCTTTTAATGCAAAXXXXXXXXXXGTGAATAGTAGTCTAATGAGCTTTGGCAGATGTATTTTGATGGGTCAAGGAGT--AAATGGTGTTGATGGAGGGGAAATGCTTATGTCTCATAAGGGTGAGA
TGTTTTTTAGAAAAATGTATGGCACTAGGGTGACTGTGAAATCAAAACCTACAGCAAAAGACCAGATAGATCCATATGTTTCTAGTGCTTTTAATGCAAAXXXXXXXXXX--GAATAGTAGTCTAATGAGCTTTGGCAGATGTATTTTGATGGGTCAAGGAGTAAAAATGGCGTTGGTGGAGGGGAAATGCTTATGTCTCATAAGGGTGAGA
* * * *
>Marker319440
TGGAATGCAACCTCATCTTGATTCTATTTTTATTTTTCTTCTAGACACTTTCAATGAACATTAACTCAGACTTTCTGCAATATTATTTTTTCATACAGAAXXXXXXXXXXCCTTCCAAACTTTTCAACCAGGATTAAGCATCCTTAGGGCGATAAAATTTCCCATACAAATGATGATAGATCAGTGAAACTGCATCGCCCTCCACAAGAA
TGGAATGCAACCTCATCTTGATTCTATTTTTATTTTTCTTCTAGACACTTTCAATGAACATTAACTCAGACTTTCTGCAATAATATTTTTTCATACAGAAXXXXXXXXXXCCTTCCAAACTTTTCAACCACGATTAAGCATCCTTAGGGCAATAAAATTTCCCATACAAATGATGATAGATCAGTGAAACTGCATCGCCCTCCACAAGAA
* * *
>Marker82928
TGTTGAGGCCAATGAAGGCATCCATGAGTTTATTGTATTGAGCTTTCTCAAAGGAGGTTGCCCCCTTGAAGTGGCCTGCGATCAATAAATTCCTTCTATGXXXXXXXXXXAGTTTTAACGAGCTCATAGTTTAACTAAAGTTCTCAAATTAAGTGTGGGTAAAGCTGAGCTGCATTTCTATGGTGTCCTCCCACATAGCATTTTCAAGAG
TGTTGAGGCCAATGAAGGCATCCATGAGTTTATTGTATTGAGCTTTCTCAAAGGAGGTTGCCCCCTTGAAGTGGCCTGCGATCAATAAATTTCTTCTATGXXXXXXXXXXAGTTTTAACGAGCTCATAGTTTAACTAAAGTTCTCAAATTAAGTGTGGGTAAAGCTGAGCTGCATTTCTATGGTGTCCTCCCACATAGCATTTTCAAGAG
*
>Marker409476
TTTGTAGGTTGCATCCAGAGGAGGAAGATTTTTATTTTCTTTCCACAAAGATTCAAAGACCCAAATGAAGTGCTTTTTCAGCATTCTTCATAGTTTCAGGXXXXXXXXXXCTAATTTTTAGAAGAAATCAGCAAGTAATTTTTAGCCTTTTATCTAAGATTTTTCTAACATAGGCATGTTCATAGTCATTTTTCAACTCTTTCAGTATGC
TTTGTAGGTTGCATCCAGAGGAGGAAGATTTTTATTTTCTCTCCACAAAGATTCAAAGACCCAAATGAAGTGCTTTTTCAGCATTCTTCATAGTTTCAGGXXXXXXXXXXCTAATTTTTAGAAGAAATCAGCAAGTAATTTTTAGCCTTTTATCTAAGATTTTTCTAACATAGGCATGTTCATAGTCATTTTTCAACTCTTTCAGTATGC
*
>Marker64736
ATAATAATTCATTTACAAGTTTGAATACATAAACGAATAAGCATTGCATTGAAGGAAATAATTGACATATCAGATGTCCCACACAAGCTATGGGTTATAGXXXXXXXXXXAGAAACAACTATGGAACTTCATTGTTTTTATTCTAATCTGTTTGTTTCACGTGTAGGTATAGGATGAGTCTTGTAGCTAATTGAAAACATAACAGCATGT
ATAATAATTCATTTACAAGTTTGAATACATAAAGGAATAAGCATTGCATTGAAGGAAATAATTGACATATAAGATGTCCCACACAAGCTATGGGTTATAGXXXXXXXXXXAGAAACAACTATGGAACTTCATTGTTTTTATTCTAATCTGTTTGTTTCACGTGCAGGTATAGGATAAGTCTTGTAGCTAATTGAAAACATAACAGCATGT
* * * *
>Marker293791
TGTGGATGCTTTAGGAATCACAATTGGAGAAATGTTAGTGCAACCAAGAGGAAACAAGGACCATCCAATTACGTATGCTAGATGTGCAAACTATCACAAGXXXXXXXXXXCCAAAATTGATATAGGGGAAGATCCAGGGCTAGCTAAGGAAGAGTTACACAACAGGAGTTTGTTTAGAATAAATGTGATAACAAAAGAACTTATAGAAGT
TGTGGATGCTTTAGGAATCACAATTGGAGAAATGTTAGTGCAACCAAGAGGAAACAAGGACCATCCAATTACGTATGCTAGATGTGCAAACTATCACAAGXXXXXXXXXXCCAAAATTGATATAGGGGAAGATCTAGGGCTAGCTAAGGAAGAGTTACACAACAGGAGTTTGTTTAGAATAAATGTGATAACAAAAGAACTTATAGAAGA
* *
>Marker297341
TGTTTTTGTGTCAAAAAGAGTCCAAAAAATCACAAAAAAATACAAAAATCATGAAAACTTCTTTGTGTTTTTTGTGTTTTACTTGCCATAATTGAGAAAAXXXXXXXXXXCTTTTTATGCATTTATCCTCTGTTTTAACATATTTATTATTGTGCATCTGCAACAGTGAGCATTTCCACATCTTTTGGGAGAAAATTTTTAGGTTTTCTA
TGTTTTTGTGTCAAAAAGAGTCCAAAAAATCACAAAAAAATACAAAAATCATGAAAACTTCTTTGTGTTTTTTGTGTTTTACTTGCCATAATTGAGAAAAXXXXXXXXXXCTTTTTATGCATTTATCCTCTGTTTTAGCATATTTATTATTGTGCATCTGCAACAGTGAGCATTTCCACATCTTTTGGGAGACAATTTTTAGGTTTTCTA
* *
>Marker266681
GAAGCTTCTAAGTGGTGAAGACCATTGCAAGGCATGCTCGTTTAATAGAGCTATAGTTAATCTTATACCACACAAGTGTTTGACTAATATAATTTATGTCXXXXXXXXXXCCTTGAAGACTGTGTAACTATTTGAGATTTGTTGGAAGAGGCATATCCATGATAGCTTTCACTTTTGCAGGATCAACTTCAATACCTTTGTGAGACACAA
GAAGCTTCTAAGTGGTGAAGACCACTGCAAGGCATGCTCGTTTAATAGAGCTATAGTTAATCTTATACCACACAAGTGTTTGACTAATATAATTTATGTCXXXXXXXXXXCCTTGAAGACTGTGTAACTATTTGAGATTTGTTGGAAGAGGCATATCCATGATAGCTTTCACTTTTGCAGGATCAACTTCAATACCTTTGCGAGACACAA
* *
>Marker259317
ATAGAGCATTTCCTTTCCATATAATTTTTTTGACACACTTGCATCGTATTGGATTTCTTCAATGAGAGTTTGAGTATCCATTCCTTCTCACACTCTTCTTXXXXXXXXXXATGCAAGATAGTCATCATTTCTTTCTCATAAAATGGCTTCAAAAAATTCTTACCTTTGAGTTGGTGACTCCCAAATGCTAGGCTTTTTCTCTCTTGCATG
ATAGAGCATTTCCTTTCCATATAATTTTTTTGACACACTTGCATCGTATTGGATTTCTTCAATTAGAGTTTGAGTATCCATTCCTTCTCACACTCTTCTTXXXXXXXXXXATGCAAGATAGTCATCACTTCTTTCTCATAAAATGGCTTCAAAAAATTCTTACCTTTGAGTTGGTGACTCCCAAATGCTAGGCTTTTTTACTCTTGCATG
* * **
>Marker514723
ACAAGAACCAATGGGCAAGTAGAAGGAGTTAATAGAGAGGTGAGTAAAAAGTCAAATGCTAGAAGAAAAAGAAGAACTCAATAAATGATCAAATATAATCXXXXXXXXXXAAGAGAAATAAAGAAGGGAAAAAGTGAAGGAAACAAGAAATGAAGGAAGATGGGCATACCTAACCTATATCACAACTCATCAAACTCAAAGAAAATAGGG
ACAAGAACCAATGGGCAAGTAGAAGGAGTTAATAGAGAGGTGAGTAAAAAGTCAAATGCTAGAAGAAAGAGAAGAACTCAATAAATGATCAAATATAATCXXXXXXXXXXAAGAGAAATAAAGAAGGGAAAAAGTGAAGGAAACAAGAAATGAAGGAAGATGGGCATACCTAACCTATATCACAACTCATCAAACTCAAAGAAAATAGGG
*
>Marker337887
CTACCCTAGTGCTTATTTCTCATGCACATGCAAATAAAGTTATCACATAAAGGCTCATGCATGCCAAAATTGGTTATCACTTAAATTTTGAATTGCAATTXXXXXXXXXX-TATAGACTTTTTCCAATCATAAGGTTATCCTAGTTTCTCTATGTGTTCCTTGAGGATGTAAAAAAAATTATAAACCTTGGCGAGAAGTTGTTTAATTACA
CTACCCTAGTGCTTATTTCTCATGCACATGCAAATAAAGTTATCACATAAAGGCTCATGCATGCCAAAATTGGTTATCACTTAAATTTTGAATTGCAATTXXXXXXXXXXTTATAGACTTTTTCC-ATCATAAGGTTATCCTAGTTTCTCTATGTGTTCCTTGAGGATGTAAAAAAAATTATAAACCTTGGCGAGAAGTTGTTTAATTACA
>Marker284033
TAACACTCACAAACATGCATGTAAAGTAAATATTCAAACATACAAGGATATGACAAGATGTCCATGTAAAGTAATGAACCCTATTAAATGTCATAGTGTAXXXXXXXXXXTAGCATGTGAGTATGAGTGATAGAATATGCTCATACAATTGGTTGCATTAGTAGGATATGTTGGCACCCAGTTTAACAAGTGCAAAAAAATTTCAACTCT
TAACACTCACAAACATGCATGTAAAGTAAATATTCAAACATAAAAGGATATGACAAGATGTCCATGTAAAGTAATGAACCCTATTGAATGTCATAGTGTAXXXXXXXXXXTAGCATGTGAGTATGAGTGATAGAATATGCTCATACAATTGGTTGCATTAGTAGGATATGTTGGCACCCAGTTTAACAAGTGCAAAAAAATTTCAACTCT
* *
>Marker99611
AATAAATCTCTCACAAATGAAGAAAAGGAGAAAAAATTAGGAAAAAACCCCTCTCCAAAAGAGAGATAACACAAGATGCTCTCTATTGGTGTTTCCATTCXXXXXXXXXXTGAGTAAATTCAGAGCAAAGGAATTTGAAAGTGAATGAGGAATGATTGTTAACACAAAAACTTAAGCAGTTTTCCTCCAAATTTACACCACAAGACTAAG
AATAAATCTCTCACAAATGAAGAAAAGGAGAAAAACTTAGGAAAAAACCCCTCTCCAAAAGAGAGATAACACAAGATGCTCTCTATTGGCGTTTCCATTCXXXXXXXXXXTGAGTAAATTCAGAGCAAAGGAATTTGAAAGTGAATGAGGAATGATTGTTAACACAAAAACTTAAGCAGTTTTCCTCCAGATTTACACCACAAGACTAAG
* * *
>Marker388480
TGACTTTGGCACTAGCTTGCTATGTCGCTAGGGGTCATGTAAATTGAGATACCTTCATGGATTACAAGCTATGAAGCTACGTTATGATAGGTGACCATGAXXXXXXXXXXCACATCAATAGGCCAAAGCTCAAGAGACATGAATGAATGACGATGCATGTATGGATGCACATGTGAATAGGGAATATATGCCCCCATAAAATATTTTTCA
TGACTTTGGCACTAGCTTGCTATGTCGCTAGGGGTCATGTAAATCGAGATACCTTCATGGATTACAAGCTATGAAGCTACGTTATGATAGGTGACCATGAXXXXXXXXXXCACATCAATAGGCCAAAGCTCAAGAGACATGAATGAATGACGATGCATGTATGGATGCACATGTGAATAGGGAATATATGCCCCCATAAAATATTTTTCA
*
>Marker245069
TTGGGTAATTGACGAAAGTCAATACTTATTCCAATAGCATTCTTGTGCATGAGATTTGTAGTTAGATCCAATTTCATTGGTTGAGATTTGACTCGATCTTXXXXXXXXXXTGGTCCATCCACATCTACAAGTGAAGAAGTTGTGAGAAAGAAGCTTCATAGAGCAGGTAGTAGACTTGAAAATTTATCCCAGTCAAAGGCTGCACTTCTC
TTGGGTAATTGACGAAAGTCAATACTTATTCCAATAGCATTCTTGTGCATGAGATTTGTAGTTAGATCCAATTTCATTGGTTGAGATTTGACTCGATCTTXXXXXXXXXXTGGTCCATCCACATCTACAAGTGAAGAAGTTGTGAGAAAGAAGCTTCATAGAGCAGGTAGTAGACTTGAAAATTTATCCCAGTCAAAGGCTGCACTTCTT
*
>Marker253291
TAAACCAATAATGTATAAATGAAACCAAAGATTGGTTACATACCTTTTCATTCTATAGTCTAGATAAACATATTCACGCCGCACTTCTTAGAATGAAAGAXXXXXXXXXXAGTATTACAATCAACCTCTCAAACTCAGAGAAGAAAACATTGCCACAAAAGGTGACCCCAAATTGGCTAAAATAGGAGATTAATGGTAGAAAAGAGTGGT
TAAACCAATAATGTATAAATGAAACCAAAGATTGGTTACATACCTTTTCATTCTATAGTCTAGATAAACATATTCACGCCACACTTCTTAGAATGAAAGAXXXXXXXXXXAGTATTACAATCAACTTCTCAAACTCAGAGAAGAAAACATTGCCACAAAAGGTGGCCCCAAATTGGCTAAAATAGGAGATTAATGGTAGGAAAGAGTGGT
* * * *
>Marker240729
ATACCTGTAGCTCACTATCTTATCTTTGAGGTATGATGTGAGTAACTTCTCAGGGCTAACCACTTACCCGTGCATCACAAAATTCATATGGCCAAAGGTTXXXXXXXXXXCAAAACTCAGGTAAGAGATTTAATGCAACTGCATGAACTATAATGACTTTATGATCACCAAGATCCCTTGAGGGTGAGGTGAGAGCATACGATGGACAAT
ATACCTGTAGCTCACTATCTTATCTTTGAGGTATGATGTGAGTAACTTCTCAGGGCTAACCACTTACCCGTGCATCACAAAATTCATATGGCCAAAGGTTXXXXXXXXXXCAAAACTCAGGTAAGAGATTTAATGCAACTGCATGAACTATAATGACTTTATGATCACCAAGATCCCTTGAGGGTGAGGTGAGAGCATACGGTGGACAAT
*
>Marker468896
ATCCCAAAGGATTATGGTGCCCAAATCCCATGGCACAAATTTCAATGCCTCCCATGGTCTTGGTCTTCCAGGATATTTTTGGCATATTCCTTACACATTGXXXXXXXXXXCCATGATGGCTAATATGTAGCAAAGAATGCCACTTCAAGGTGGGATACTCCACTCATGTGAGGAAAAAATAATAAATCAATACAAATTGAAAGGAAGTAA
GTCCCAAAGGATTATGGTGCCCAAATCCCATGGCACAAATTTCAATGCCTCCCATGGTCTTGGTCTTCTAGGATATTTTTGGCATATTCCTTACACATTGXXXXXXXXXXCCATGATGGCTAACATGTAGCAAAGAATGCCACTTCAAGGTGGGATGCTCCACTCATGTGAGGAAAAAATAATAAATCAATACAAATTGAAAGGAAGCAA
* * * * *
>Marker211052
TATTATCAAATATGCGGATATGGGATTTTCCTTTGTTAAAACACATGCAGGGTGATATTCATGAATATCAAGGATATTAGGAAATATGACCCCGAGGACAXXXXXXXXXXCTAAGGCAAAATGGGGTGTGTTGTGTAACCACACAACACTACTCTGATCAGCCTTAGGAGTTTCATCATTCTTTCTCATCTTGCAACTAGTAGTCATAGG
TATTATCAAATATGCGGATATGGGATTTTCCTTTGTTAAAACACATGCAGGATGATATTCATGAATATCAAGGATATTAGGAAATATGACCCCGAGGACAXXXXXXXXXXCTAAGGCAAAATGGGGTGTGTTGTGTAACCACACAACACTACTCTGATCAGCCTTAGGAGTTTCATCATTCTTTCTCATCTTGCAACTAGTAGTCATAGG
*
>Marker468581
TTCAGCTTGAGAGCCAATTGCATATTATATCTTCTGCAAAGAAGAAATGGGATACAACACTTGCCCAGTTGAAGGTAATTTATAAGAATTTTCTACCTTCXXXXXXXXXXTTTAGACAAGGGGAGTCTATATGTTTTGCAGGAATAGAGGGAGACAACTAGCCCTTTTCCATTGATGTTAAAGGTGGATAAATGTGTGCATATCAGGTCA
TTCAGCTTGAGAGCCAATTGCATATTATATCTTCTGCAAAGAAGAATTGGGATACAACACTTGCCCAGTTGAAGGTAATTTATAAGAATTTTCTACCTTCXXXXXXXXXXTTTAGACAAGGGGAGTCTATATGTTTTGCAGGAATAGAGGGAGACAACTAGCCCTTTTCCATTGATGTTAAAGGTGGATAAATGTGTGCATATCAGGTCA
*
>Marker93237
TGAACTTACACCTTTTCTTGCTCTGGGGGTGGATCATTGTCTTTATCCTGATCATGGTCACCTTGGTATCCTAGATCAATTACTACAGGGTGTGTGACCTXXXXXXXXXXAGAGGTGATTCCTTCCCTTCACTCTACATTTCTTCCCTTTGTTCATCTACCTTTTCAGTTTTAAATTGCATAATCTTAGGGATAGGAACCTTGTGTCATA
TGAACTTACACCTTTTCTTGCTCTGGGGGTGGATCATTGTCTTTATCCTGATCATGGTCACCTTGGTATCCCAGATCAATTACTACAGGGTGTGTGACCTXXXXXXXXXXAGAGGTGATTCCTTCCCTTCACTCTACATTTCTTCCCTTTGTTCATCTACCTTTTCAGTTTTAAATTGCATAATCTTAGGGATAGGAACCTTGTGTCGTA
* *
>Marker208550
ATTTACAATGAAATACAACTATTTTCAACTTCCCCAACTAAAAATTAACTCCCTTTAACAAGTTATTCAAAGTTAATGCATTATTTTTGACAATAATGATXXXXXXXXXXGCATGCTTAGCTGTTCTCTGACCTCCTCTTGATCCTCCCAGCTTGGTTTGATCTACGCCATGATTCTTGGTCTTCACTCTTCTGTTTCGTGCTTGCTTTT
ATTTACAATGAAATACAACTATTTTCAACTTCCCCAACTAAAAATTAACTCCCTTTAACAAGTTATTCAAAGTTAATGCATTATTTTTGACAATAATGATXXXXXXXXXXGCATGCTTAGCTGTTCTCTAACCTCCTCTTGATCCTCCCAGCTTGGTTTGATCTACGCCATGATTCTTGGTCTTCACTCTTCTGTTTCGTGCTTGCTTTT
*
>Marker386133
CATAGGCATATGAACACTAGTTTGGTAAGCCCACAATTGATAATTGAGTGTGTCAATCCTTTTGATGTTTCTTAATAGTTTTTCAAAGAATTAGTTCAATXXXXXXXXXXTATGATGATGAAAGTATGTCCCTAGGAGGAAGGAGGAGCAATCTTTCCAATAAGATCCAAGCCCCACACAGAAAATGGCCAAGGTGAAACTTGAGCACAA
CATAGGCATATGAACACTAGTTTGGTAAGCCCACAATTGATAATTGAGTGTGTCAATCCTTTTGATGTTTCTTAATAGTTTTTCAAAGAATTAGTCCAATXXXXXXXXXXTATGATGATGAAAGTATGTCCCTAGGAGGAAGGAGGAGCAATCTTTCCAATAAGATCCAAGCCCCACACAGAAAATGGCCAAGGTGAAACTTGAGCACAA
*
>Marker267086
CATACAAATATGGAGAGAGGTAGAAGTGGAAGGTCAAGAAGGGATAACCAGCCTAATGTTAATCATTTCTTGACTACTTTTGCCCAACAACGACGACAAAXXXXXXXXXXATGTATTCAATAAGCAGTTGCGTAAGTTCTTGTTGGTTTTCTTTGATGACATCTTGATATATAGGAAGACACGAGAGGAGCATCTTCGACATCTTGATGA
CATACAAATATGGAGAGAGGTAGAAGTGGAAGGTCAAGAAGGGATAACCAGCCTAATGTTAATCATTTCTTGACTACTTTTGCCCAACAACGACGACAAAXXXXXXXXXXATGTATTCAATAAGCAGTTGCGTAAGTTCTTGTTGGTTTTCTTTGATGACATCTTGATATATAGGAAGACACGGGAGGAGCATCTTCGACATCTTGATGA
*
>Marker356428
TTCAATTTACCCTCATCCGCCATTGCTCCCACTCAACCGTGAGACTCCCACTCAATCGTGAGACCTTCCTGCAGATGATAATTGAACACAACCTGGCTCTXXXXXXXXXXGGGGGAAATCGCACCGATAAAAGTGGAGAAAATTTAACCTCTGAGTCTAATTAGGCTCCATATAACAACACTTACATAACCAAGAAGACTATGATCATGA
TTCAATTTACCCTCATCCGCCATTGCTCCCACTCAACCGTGAGACTCCCACTCAATCGTGAGACCTTCCTGCAGATGATAATTGAACACAACCTGGCTCTXXXXXXXXXXGGGGGAAATCGCACCGATAAAAGTGGAGAAAATTTAACCTCTGAGTCTGATTAGGCTCCATATAACAACACTTACATAACCAAGAAGACTATGATCATGA
*
>Marker247460
TGCTTTTTAGTCAAAAAGAGTCCAAATATTACAAAAAATAAAAAATCATGAAAAATTCTTTGTGTTTTCTATGTCTTACTTGCCATAATTGAGAAATTAGXXXXXXXXXXACTTGTTGCGCATATATCCTCTATTTTAGCACATTTGTAGTTGCACATCCAAGACAATGAGCTTTCCTGGTATTTTGAGAGAACATCTTCAACCTTTCTA
TGCTTTTTAGTCAAAAAGAGTCCAAATATTACAAAAAATAAAAAATCATGAAAAATTCTTTGTGTTTTCTGTGTCTTACTTGCCATAATTGAGAAATTAGXXXXXXXXXXACTTGTTGCGCATATATCCTCTATTTTAGCACATTTGTAGCTGCACATCCAAGACAATGAGCTTTCCTGGTATTTTGAGAGAACATCTTCAACCTTTCTA
* *
>Marker356559
TCCAACTAGACTCTTTAACCTCCTCCATTAAAATAAGACATTCATTTGATTCTTTGGAATAGACAAGGATTTTAAAACCTTATCCTAAACTAGTTTACCAXXXXXXXXXXTCTCAGCCATAACTCAACTATGCATATTTTAATATTTTCAAGTAAGGAAATTCACAAGAATTCGCATATTACTTCACATTTAACCAGATAACTCATGTTT
TCCAACTAGACTCTTTAACCTCCTCCATTAAAATAAGACATTCATTTGATTCTTTGGAATAGACAAGGATTTTAAAACCTTATCCTAAACTGGTTTACCAXXXXXXXXXXTCTCAGCCATAACTCAACTATGCATATTTTAATATTTTCAAGTAAGGAAATTCACAAGACTTCGCATATTACTTCACATTTAACCAGATAACTCATGTTT
* *
>Marker265678
AGCCTTGGAACCCTCTGCTGAGAGAGTTCTATATAGTAGAAGTTTTATTCTTAGAGAGATTAAGTCTTCTTCCATAATGTTGTAGCCAGAAGAGGATGGGXXXXXXXXXXGAATTATGAAGGAGGTGATGGATATGGGATTTTATGAGTCTGAGAGAGTAGCTATGGATGAGGAGATGTCCGCATTGAAGAAGAATGACACATGGGACTT
AGCCTTGGAACCCTCTGCTGAGAGAGTTCTATATAGTAGAAGTTTTATTCTTAGAGAGATTAAGTCTTCTTCCATAATGTTGTAGCCAGAAGAGGATGGGXXXXXXXXXXGAATTATGAAGGAGGTGATGGATATGGGATTTTATGAGTCTGAGAGAGTAGCTATGGACGAGGAGATGTCCGCATTGAAGAAGAATGACACATGGGACTT
*
>Marker237852
ATTGCAAGAACAATGTAATAAGGGGGGAATGTTAGCATTGATTACTACATTGTTCTGTCGGCGGTTGGTTCAGTTCGTTGTAAGTTAGAGTTGGTTACTAXXXXXXXXXXTTTTTAATTGAACCTCAAAAGATTCGGCATTAGCTTTCCATAACTCAAACGTTTCATCTCCCTTTCCTTTTAGACAATGATCTGGTCCCTGTTTGGGTGG
ATTGCAAGAACAATGTAATAAGGGGGGAATGTTAGCATTGATTACTACATTGTTCTGTCGGCGGTTGGTTCAGTTCGTTGTAAGTTAGAGTTGGTTACTAXXXXXXXXXXTTTTTAATTGAACCTCAAAAGATTCGGCATTAGCTTTCCATAACTCAAACGTTTCATCTCCCTTTCCTTTTAGACAATGATCTGGTCCTTGTTTGGGTGG
*
>Marker162317
AGCCACTATGTGGCACTTGTTATTATATAAAAAGTAATCAAACTAATATAAATTTAAAACAAATAAAAAATATAAGGTATGCTTTTTTTCACCATTACACXXXXXXXXXXCAAAGACATGAATCACTCTTAAAGGAAAATCCTAAAAGAGGACCACACTCTTATTAGCCCGAAAAAATTTATTATGTCAAGGGCTTGATTTGTATAAATG
AGCCACTATGTGGCACTTGTTATTATATAAAAAGTAATCAAACTAAAATAAATTTAAAACAAATAAAAAATATAAGGTATGCTTTTTTTCACCATTACACXXXXXXXXXXAAAAGACATGAATCACTCTTAAAGGAAAATCCTAAAAGAGGACCACACTCTTATTAGCCCGAAAAAATTTATTATGTCAAGGGCTTGATTTGTATAAATG
* *
>Marker639344
TTAGAATTTTATCAAACAATGAATGACTCAAGGACTTTTACATGACTTCAACATACTCAAGGGTCATCATATGACCTTATTACATAGATATTGGTCTATAXXXXXXXXXXATATTCTTGTATTGAAAATATTTACAAAATCTACACATTCACCATTAGAACTAGCAACAAAGAGGAGTGTTGTATCTACTTCTAGTGGTCATGTTTTCTA
TTAGAATTTTATCAAACAATGAATGACTCAAGGACTTTTACATGACTTCAACATACTCAAGGGTCATCATATGACCTTACTACATATATATTGGTCTATAXXXXXXXXXXATATTCTTGTATTGAAAATATTTACAAAATCTACACATTCACCATTAGAACTAGAAACAAAGAGGAGTGTTGTATCTACTTCTAGTGGTCATGTTTTCTA
* * *
>Marker395901
CATCTTTCAATGGTTATTGTAATTCATGAAATAAGTTTGGTCATAAGGCTACTCAATGTAGAAGCAGAGTGAATCAAAATATTCCATCTTTTTCTAGTTAXXXXXXXXXXTAGAATTGGACATAAGGCTAATCAATGCAGATCCAGAATGAATGGAAGGAACAATGGATAGAGGAATGTTGTATGTTTCCATTGCAATAGGCTTGGACAT
CATCTTTCAATGGTTATTATAATTCATCAAATAAGTTTGGTCATAAGGCTACTCAATGTAGAAGCAGAGTGAATCAAAATATTCCATCTTTTTCTAGTTAXXXXXXXXXXTAGAATTGGACATAAGGCTAATCAATGTAGATCCATAATGAATGGAAGGAACAATGGATAGAGGAATGTTGTATGTTTCCATTGCAATAGGCTTGGACAT
* * * *
>Marker151547
AGCTACACCTCACACCAAAATCATACCTTCTTTTCCCATCTTAATGATACTATTGACAAGGCAAGCACCACCGCAAGTCAGAAATCATATACCACCCCGTXXXXXXXXXXTCCTTGACCTTACAAAAGATGCTTCCAATAACATGTCAAATCCTACAACCCCTTGAGCTTATCGAAGAACCTCCTACCATAAACCCAAGTCAAGAGCTAT
AGCTACACCTCACACCAAAATCATACCTTATTTTCCCATCTTAATGATACTATTGACAAGGCAAGCACCACCGCAAGTCAGAAATCATATACCACCCCGTXXXXXXXXXXTCCTTGACCTTACAAAAGATGCTTCCAATAACATGTCAAATCCTACAACCCCTTGAGCTTATCAAAGAACCTCCTACCATAAACCCAAGTCAAGAGCTAT
* *
>Marker407723
CTGTGCCATGGAGAAGTTCACTCCTTTTCATGAGGGCACAAACCAGTTCCACCTAAATCGGTGTATCAAAAGACCTGTCAATAGTTACAGGCTTCATTTTXXXXXXXXXXGCACTTGTAGCGAGGGATTTTTCCTATGACCTGTTGTCATACATATCCAATTTTCTAAGTTGTGATATAAAGACGTATTCCTCCTCCAAAATCAATGTGT
CTGTGCCATGGAGAAGTTCACTCCTTTTCATGAGGGCACAAACCAGTTCCACCTAAATCGGTGTATCAAAAGACCTGTCAATAGTTACAGGCTTCATTTTXXXXXXXXXXGCACTTGTAGCGAGGGATTTTTCCTATGACCTGTTGTCATACATATCCAATTTTCTAAGTTGTGATATAAAGACGCATTCCTCCTCCAAAATCAATGTGT
*
>Marker282756
GACTATGTCAAACAGAAGCTTCGGCCTGTCTTTACACTGAACATTCACTACAGAATAACCCCTTTCGAAGCAGTTGTCCAACGTTACACAAGACTTAGGCXXXXXXXXXXGTCAGCCAGAACAGCAAATATTTCAGAGAGTAAACCAGGGCGGTCTGTTCCTGTTAATTCAATAGCTGTGTGTTCAGCTGCCGCTTCCATGCCGAAGGAA
GACTATGTCAAACAGAAGCTTCGGCCTGTCTTCACACTGAACATTCACTACAGAATAACCCCTTTCGAAGCAGTTGTCCAACGTTACACAAGACTTAGGCXXXXXXXXXXGTCAGCCAGAACAGCAAATATTTCAGAGAGTAAACCAGGGCGGTCTGTTCCTGTTAATTCAATAGCTGTGTGTTCAGCTGCCGCTTCCATGCCGAAGGAA
*
>Marker447788
TCCCTATAGTTCCATCAGCTGATTGCTTGTTCTTGTATGGCCACTTAGAATGAATCATTGGTCTCACCACAGGTCAAGTCACCTCCTCCCAAACATTGTTXXXXXXXXXXTAGAACTAGATTCTGGTCTTGATTGACGAGCACTTTTGGTTGGATAAAAAAACAGACCAGCAGGAGTATCAGTCTCTTCAATCATTGGAGAGGCCTCCGA
TCCCTATAGTTCCATCAGCTGAATGCTTGTTCTTGTATGGCCACTTAGAATGAATCATTGGTCTCACCACAGGTCAAGTCACCTCCTCCCAAACATTGTTXXXXXXXXXXTAGAACTAGATTCTGGTCTTGATTGACGAGCACTTTTGGTTGGATAAAAAAACAGACCAGCAGGAGTATCAGTCTCTTCAATCATTGGAGAGGCCTCCGA
*
>Marker387806
TCAAAACTGAGTGTAGCAACAAGGTGAGATACCAATCAAAGTGTGCAAGAGCAGATTGAGTGGATCGTAAAAATGTTAGTCACAAGAAATGCCACAATATXXXXXXXXXXCCACATAGAAGGATGTCCCTAGGTCATCAACCACAATGTTATGACCCTAAGGCATGACACACAACAATAAAATAAAGGAGAGGAACAATAGAAGAATGAT
TCAAAACTAAGTGTAGCAACAAGGTGAGATACCAATCAAAGTGTGCAAGAGCAGATTGAGTGGATCGTAAAAATGTTAGTCACAAGAAATGCCACAATATXXXXXXXXXXCCACATAGAAGGATGTCCCTAGGTCATCAACCACAATGTTATGACCCTAAGGCATGACACACAACAATAAAATAAAGGAGAGGAACAATAGAAGAATGAT
*
>Marker486247
ATATTTATCACCCACTCAAACAATTTATTATGGTTGTTTTCAAGCAGTAATGGACAATTTCAAGATTTTGCAGTTTGGCACCATTCAGGTCAGGCATTTTXXXXXXXXXXTCATGCCTTTAGAGCTTTGTAGGCTGTTATTTTCTCCCTTTTCTTTCATTCTAGTAGCCTTCATGTCTCCTAAGATGCTCTAATCTTCACGAGCAATGAT
ATATTTATCACCCACTCAGACAATTTATTATGGTTGTTTTCAAGCAGTAATGGACAATTTCAAGATTTTGCAGTTTGGCACCATTCAGGTCAGGCATTTTXXXXXXXXXXTCATGCCTTTAGAGCTTTGTAGGCTGTTATTTTCTCCCTTTTCTTTCATTCTAGTAGCCTTCATGTCTCCTAAGATGCTCTAATCTTCACGAGCAATGAT
*
>Marker208290
TCATTTAATTAGCCGATAGACTTTTTACTTTTTATAAGTGGGCTTGCCTGTAAACCTGTCTTACATTGGGAAACTGAGAAACACCACCCATAAACGGGAAXXXXXXXXXXTAAATGCAGTTTGCTCACAGCTGACAGGCCTTCTTGCCAGGTTGTGTGTATAATAAATACATTTGAATACAATGGCTATTGCACTAAAGAATATATAGCA
TCATTTAGTTAGCCGATAGACTTTTTACTTTTTATAAGTGGGCTTGCCTGTAAACCTGTCTTACATTGGGATACTGAGAAACACCACCCATAAACGGGAAXXXXXXXXXXTAAATGCAGTTTGCTCACAGCTGACAGGCCTTCTTGCCAGGTTGTGTGTATAATAAATACATTTGAATACAATGGCTATTGCACTAAAGAATATATAGCA
* *
>Marker414148
AGGGTTGAATTTGCCATCCATTCAGTTATTAGAGAGGTGTTACTTCAAGACTTCCTATGAATCCTCTTGTTTTTCAAGGTCACATTCATTTTTCTCTCTTXXXXXXXXXXTGGGAGGTGTTCAACGCATTGAGATTTCTCCACCACCACACTCTAAACCAAGCTCAAATCGACTTAACTATTTATGTGTTTTGGTAGGATATTAAAACTT
AGGGTTGAATTTGCCATCCATTCAGTTATTAGAGAGGTGTTACTTCAAGACTTCCTATGAATCCTCTTGTTTTTCAAGGTCACATTCATTTTTCTCTCTTXXXXXXXXXXTGGGAGGTGTTCAACGCATTGAGATTTCTCCACCACCACACTCTAAACCAAGCTCAAATTGACTTAACTATTTATGTGTTTTGGTAGGATATTAAAACTT
*
>Marker432693
AATCATGAAGGCTAAATAGCCATCACAAAAGAGAGATAATTTATTACAAAGAGGTAGACACAAGATAACCATCTATATTCATTGGTGAACCACTATCAGAXXXXXXXXXXCCCATGAATGCTACAATAACTTCACTTATGTGTCCTCAGAACACACCCACATGGCTCTACCCTAGAAACCTACTAAAACATATCATCTTCCCATGCCTTG
AATCATGAAGGCTAAATAGCCATCACAAAAGAGAGATAATTTATTACAAAGAGGTAGACACAAGATAACCATCTATATTCATTGGTGAACCACTATCAGAXXXXXXXXXXCCCATGGATGCTGCAATAACTTCACTTATGTGTCCTCAGAACACACCCACATGGCTCTGCCCTAGAAACCTGCTAAAACATATCATCTTCCCATGCCTTG
* * * *
>Marker280272
TGATTGAATTTCCCTTCGGCTCATAAGAAATGATATCTATGGGTAATTATTGGAAAGTTTTGATGTCAATTATTCGAGCATGATAATACTAATGTTGTTCXXXXXXXXXXTTTAGATTATGTTCTGTATTTTATTACCTGTTTCTCTCGTATCTGTTATTGTGTTAAAAGTTGTGCGGGAAGATAAATGCATTTAGAAGGGAAGTTTAGG
TGATTGAATTTCCCTTCGGCTCATAAGAAATGATATCTATGGGTAATTATTGGAAAGTTTTGATGTCAATTATTCGAGCATGATAATACTAATGTTGTTCXXXXXXXXXXTTTAGATTATGTTCTGTATTTTATTACCTGTTTCTCTCGTATCTGTTATTGTGTTAAAAGCTGTGCGGGAAGATAAATGCATTTAGAAGGGAAGTTTAGG
*
>Marker477771
CAATTTCTGCTGGAGTGAAGGTTGAAGGACAGAGGAAGTGAGTGTATTTGTAATCTCCTTTTGTGAAGATAATACAACTTGACCTCTTTTTGAAAGAAAGXXXXXXXXXXGAAGTATATCCAACCAAAGATCCAAAAGGTAATTTGACATCTATGAGATTCTTACATACAACCTCCATCTCAAGTTCCTGATATATAGGAGATACAATAC
CAATTTCTGCTGGAGTGAAGGTTGAAGGACAGAGGAAGTGAGTGTATTTGTAATCTCCTTTTGTGAAGATAATACAACTTGACCTCTTTTTGAAAGAAAGXXXXXXXXXXGGAGTATATCCAACCAAAGATCCAAAAGGTAATTTGACATCTATGAGATTCTTACATACAACCTCCATCTCAAGTTCCTGATATATAGGAGATACAATAC
*
>Marker239737
TCATATTCTCCACATCTAGTGTTGATGATCTTGACCTTGGTGGACTTGAGATTTTGAGAAGGAGACAAGGTGGAAGCAAGGGTGTTGGGATCAACATATGXXXXXXXXXXAGAACAACTCATAGCGACAAACATATAATACCCTTTGATTCTCTTGCTGCATTGTCATAAGCCTTTTTTGTAATTATGTGTGGCTCAAGGTCATTTCCAG
TCATATTCTCCACATCTAGTGTTGATGATCTTGACCTTGGTGGACTTGAGATTTTGAGAAGGAGACGAGGTGGAAGCAAGGGTGTTGGGATCAACATATGXXXXXXXXXXAGAACAACTCATAGCGACAAACATATAATACCCTTTGATTCTCTTGCTGCATTGTCATAAGCCTTTTTTGTAATTATGTGTGGCTCAAGGTCATTTCCAG
*
>Marker475200
TTGTTCAAGTAGTGTTGTTGGGGTCACTCATGTAGATTTATGTCTCTTTGATCTTGATCTTCATCCTGATTTTAGTGAAGGACTTCAATTTCATCAATATXXXXXXXXXX--------GACTTTTTCATGTTTTCTCTACACATTTTCTCTTTTGGGGAGGAGTTTTTTCCTAGGATTTTTCTCATTTTCTCCATTGATGATAGATTTTTTTTACATG
TTGTTCAAGTAGTGTTGTTGGGGTCACTCATGTAGATTTATGTCTCTTTGATCTTGATCTTCATCCTGATTTTAGTGAAGGACTTCAATTTCATCAATATXXXXXXXXXXCATTCCTTGACTTTTTCATGTTTTCTCTACACATTTTCTCTTTTGGGGAGGAGTTTTTTCCTAGGATTTTTCTCATTTTCTCCATTGATGATAGA----TTTT---T-
>Marker484234
TGGGTTTTGTTGTTTCCAAAAGTGGGCTAAAAATGGATCCAAAAAAAGTGAGGGTGATTGTGGATTGGCCTTTGCCAAAGAACGTGTTTGAACAAAGAAGXXXXXXXXXXGAGTCTTGAGTCAAGAAAGTAGACCAATAGCATATTTTAGTGAGAAGTTAAATGAGGTGAAAATAAAATGATTCATGCATGACCAAGAGTTTTATGCCAT
TGGGTTTTGTTGTTTCCAAAAGTGGGCTAAAAATGGATCCGAAAAAAGTGAGGGTGATTGTGGATTGGCCTTTGCCAAAGAACGTGTTTGAACAAAGAAGXXXXXXXXXXGAGTCTTGAGTCAAGAAAGTAGACCAATAGCATATTTTAGTGAGAAGTTAAATGAGGTGAAAATAAAATGATTCATGCATGACCAAGAGTTTTATGCCAT
*
>Marker386149
TTAGTAGGTTGAATTGTGATAGTTATGTATATGAATAAATTTCCTACGGTATATGGTTATGTTTAACTTGTGCTAAATTACTCCATCTATCTTTCAGATGXXXXXXXXXX-CTTTACCCTGCAAACTCAGATTTACACTTGAGGAATTTTTAAAAAGTGGATAAAAGGTTATTTTTATTTATTTTATAGAATAAAATACCCCCCTTGGACA
TTAGTAGGTTGAATTGTGATAGTTATGTATATGAATAAATTTCCTACGGTATATGGTTATGTTTAACTTGCGCTAAATTACTCCATCTATCTTTCAGATGXXXXXXXXXXCCTTTATCCTGCAAACTTAGATTTACACTTGAGGAATTTTTAAAAAGTGGATAAAAGGTTATTTTTATTTGTTTTATAGAATAAAAT-CCCCCCTTGGACA
* * * *
>Marker184788
AGAAAGCACCTTGTGGAGATGACATGAGGGTAGTTGGAATTCTCTCCCACGTCCTCTAGAATCTAAAGTTAAAGTTTGCCAGCATCTCACTTGGAGCCCTXXXXXXXXXXTCACAGAACCATCGCCCGTGAAGGGTGAAAGACTTTTCAGGGATGCAATAGGTATGTCATTGTATGCAACCAAATCTAATGGACTTCCTCCATTAAAGGT
AGAAAGCACCTTGTGGAGATGACATGAGGGTAGTTGGAATTCTCTCCCACGTCCTCTAGAATCTAAAGTTAAAGTTTACCAGCATCTCACTTGGAGCCCTXXXXXXXXXXTCACAGAACCATCACCCGTGAAGGGTGAAAGACTTTTCAGGGATGCAACAGGTATGTCATTGTATGCAACCAAATCTAATGGACTTCGTCCATTAAAGGT
* * * *
>Marker266728
ATTTCTACTAGTATGAAGTAGACTCTTCAAAATATCACATTTTTAATACGAAGAAAAAAATTATTACAATATGTGAGCATGGGCTTTGAATTAAAGCTCAXXXXXXXXXXGCTATAGTAAAATAGAACAAAGAATGTAATTGTTATTTCTAACTTAGTCAACGTAAGACATAAGAAGAGAATTTATTTTGGGTTATTTAGGATAAGTGAT
ATTTCTACTAGTATGAAGTAGACTCTTCGAAATATCACATTTTTAATACGAAGAAAAAAATTATTACAATATGTGAGCATGGGCTTTGAATTAAAGCTCAXXXXXXXXXXGCTATAGTAAAATAGAACAAAGAATGTAATTGTTATTTCTGACTTAGTCAACGTAAGACATAAGAAGAGAATTTCTTTTGGGTTATTTAGGATAAGTGAT
* * *
>Marker187075
TCCAAACGCATCAGCTCACGGAGAAAAGTGATGTTTACAGTTTTGGTGTAGTCCTGGTTGAGCTTTTAACAGCTCTGAAACCCATCTCTGAAGAAAGAGAXXXXXXXXXXAAAGGCAAATTTCCATGACACTGTAAAGTGTGAGCAGACAAACATTTCCAGAGAAGCATTACAAAGTTTCAGGAGTTACACTTTTCCATCTGCAGTTGTG
TCCAAACGCATCAGCTCACGGAGAAAAGTGATGTTTACAGTTTTGGTGTAGTCCTGGTTGAGCTTTTAACAGCTCTGAAACCCATCTCTGAAGAAAGAGAXXXXXXXXXXAAAGGCAAATTTCCATGACACTGTAAAGTGTGAACAGACAAACATTTCCAGAGAAGCATTACAAAGTTTCAGGAGTTACACTTTTCCATCTGCAGTTGTG
*
>Marker171723
CTCGTGTAGAGGTCATACGGCCTCTCCAAACAAAAAAAATTGTCTCTCGCTATAACTTTGTCCAAATTGAACAAATTTTATATGGATCTATAGGTTCTC-G-XXXXXXXXXXTCAAATTCTAAACTACGTTCAAACTTCCAATTGAGCAAACAAGTGGATTTGCTCATGATTATGAATATGAATGTTCAAACGATCATGCAAGATCTTTACA
CTCGTGTAGAGGTCATACAGCCTCTCCAAACAAAAAAAATT--CTCTCGCTATAACTTTGTCCAAATTGAACAAATTTTATATGGATCTATAGGTTCTCGGTXXXXXXXXXXTCAAATTCTAAACTACGTTCAAACTTCCAATTGAGCAAACAAGTGGATTTGCTCATGATTATGAATATGAATGTTCAAACGATCATGCAAGATCTTTACA
*
>Marker425652
AAGGTTATTGGTGCCAGCACTAGGAGACTGTTCAGAACAAAGCCGATGAACAGATTCATTCCAGTGAATTTGGCTCAGAGAGTGGTCTGAGGTGTGACTAXXXXXXXXXXTGTCTATCCTCCATCCAGACGACCACGACAATAAATACAAGAAAGGTGAAATGACTCTCAAGGCATTGCATGATGGGCACAGCATCTTCTTCCTACTGCA
AAGGTTATTGGTGCCAGCACTAGGAGACTGTTCAGAACAAAGCCGATGAACAGATTCATTCCAGTGAATTTGGCTCAGAGAGTGGTCTGAGGTGTGACTAXXXXXXXXXXTGTCTATCCTCCATCCAGACGACCATGACAATAAATACAAGAAAGGTGAAATGACTCTCAAGGCATTGCATGATGGGCACAGCATCTTCTTCCTACTGCA
*
>Marker506546
CCAATTTCTAACATTTAAAAAGGAGTCTCGAATCAATCCAAATCCAATTGAATGGGTATACTCCTAATCTTGGGTGAGATCAAAAATGTTAGAAATGAAAXXXXXXXXXXAGGCAACACCAAAGAATGAAAAAGGATACTAGATAAGCACATTTTGAGCCATTTAAAAATGAAACTTGATGAGTGCCTAATAAATGAACATGATGGGGAA
CCAATATCTAACATTAAAAAAGGAGTCTCAAATCAATCCAAATCCAATTGAATGGGTATACTCCTAATCTTGGGTGAGATAAAAAATGTTAGAAATGAAAXXXXXXXXXXAGGCAACACCAAAGAATGAAAAAGGATACTAGATAATCACATTTTGAGCCATTTAAAAATGAAACTTGATGAGTGCCTAATAAATGAACATGATGGGGAA
* * * * *
>Marker78769
CCACAATCACCCTAGATCATACACATCTACGACTACATCATGATTTATGTCCTCAGCCTCTGAATCACTGATGTCAACCTCTGCAATCATAGGATGAGGCXXXXXXXXXXTCTATCAAATCTCTGTCTCCAATAAAAAAGGTTCCAAAACTACCATGGCCTCACCAAACCATAGGCATGGGCTCAGGGATCCATCCAAGTAGTGGCAGTA
CCACAATCACCCTAGATCATACACATCTACGACTACATCATGATTTATGTCCTCAGCCTCTAAATCACTGATGTCAACCTCTGCAATCATAGGATGAGGCXXXXXXXXXXTCTATCAAATCTCTGTCTCCAATAAAAAAGGTTCCAAAACTACCATGGCCTCACCAAACCATAGGCATGGGCTCAGGGATCCATCCAAGTAGTGGCAGTA
*
>Marker80597
TAGTCGTGCCTTGAAATAGGAGTTGAGGACACGAGCACTCGCGCCCTTGTCCTGCCATATTTCAGGCAGGTCCCAAATTTGAATTTCAGTTATGTGACTAXXXXXXXXXXAACATATGAGCAGAAACAAAATGAACACACTTGACACCAAGATTATTAACATGGAAACCTGATTAAGGGAAAACCATGGTGGGGGTTAACCCACAAGATT
TAGTCGTGCCTTGAAATAGGAGTTGAGGACACGAGCACTCGCGCCCTTGTCCTGCCATATTTTAGGCAGGTCCCAAATTTGAATGTCAGTTATGTGACTAXXXXXXXXXXAACATATGAGCAGAAACAAAATGAACACACTTGACACCAAGATTTTTAACATGGAAACCCGATTAAGGGAAAACCATGGTGGGGGTTAACCCACAAGATT
* * * *
>Marker517429
TATTATTATTATTATTGTCTAGTTGCTCTATTGAGTTGGTTACTTGGTTGAATAAGGTAGTCATACTATGCTTGTTGTTGCAAAACCTGACACTCAAATTXXXXXXXXXXACCTCATTCCTTAAAAGTATTAGATCTAATATTTTTCTATGGAGTGCTTTGTGGGTGGTAATTGTTTTCTACTTTTCTTTTGTTTGTTCTTCTATTTTAT
TATTATTATTATTTTTGTCTAGTTGCTCTATTGAGTTGGTTACTTGGTTGAATAAGGTAGTCATACTATGCTTGTTGTTGCAAAACCTGACACTCAAATTXXXXXXXXXXACCTCATTCCCTAAAAGTATTAGATCTAATATTTTTCTATGGAGTGCTTTGTGGGTGGTAATTGTTTTCTACTTTTCTTTTGTTTGTTCTTCTATTTTAT
* *
>Marker296008
AACAAGAAGCAAAGTTGCTGAAGAACATGTAAATCTATGTTTAATTTCTAAAGTAGAACCTAAAATAGTAGTTGGGGCATGCAAGGATGAGCTTTGGAACXXXXXXXXXXGTTAGAAAATGAATCTGTCACTAGTCTGAAGGTTGAAGTTGAAGAAAAGGTAAGAACTAAGGAATGTCTGAACTCAATGATGAAAGGAAAATTTGAAGAA
AACAAGAAGCAAAGTTGCTGAAGAACATGTAAATCTATGTTTAATTTCTAAAGTAGAACCTAAAATAGTAGTTGGGGCATGCAAGGATGAGCTTTGGAACXXXXXXXXXXGTTAGAAAATGAATCTGTCACTAGTCTAAAGGTTGAAGTTGAAGAAAAGGTAAGAACTAAGGAATGTCTGAACTCAATGATGAAAGGAAAATTTGAAGAA
*
>Marker401232
TATTCTTGATGGTATTTTTGTTTAAATCTTTGTAGCCTATGCATATCCTCATAGTTCTATCCTTCTTCTTAACCAAGACTACAAATGAAGCAAAAGGGCTXXXXXXXXXXTACTAAAGATTGGGTTGCGCAAGAAACTTATCCTTAGTGAAATATTCTCTCTATTCTTTTTATAGAAACAATTATAGAATCTCCATTTTTCATTCCACAG
TATTCTTGATGGTATTTTTGTTTAAATCTTTGTAGCCTATGCATATCCTCATAGTTCTATCCTTCTTCTTAACCAAGACTACAAATGAAGCAAAAGGGCTXXXXXXXXXXTACTAAAGATTGGGTTGCGCAAGAAACTTGTCCTTAGTGAAATATTCTCTCTATTCTTTTTATAGAAACAATTATAGAATCTCCATTTTTCATTCCACAG
*
>Marker228528
TGTTCCTTTG---TCATGTCGCTTTTCAATGTCTTAAATCACCTATTGTAATATGCACACATACAAGAAGGGGGAAAAATGTTTGTGGCTATATTGGAGATTGXXXXXXXXXXGAAATAAGTTTCAAATCTTTAGCTTCACGTTAATGAAGTAGAGAGTGACCAAAGCTTGGAGGTGAGAACAAGTCAGAACCATACAAAATTGTGATGAAGA
TGTTCCTTTGTCTTCATGTCGCTTTTCAATGTCTTAAATCACCTATTGTAATATGCACACATACAAGAAGGGGGAAAAATGTTTGTGGCTATATTGGAGA---XXXXXXXXXXGAAATAAGTTTCAAATCTTTAGCTTCACGTTAATGAAGTAGAGAGTGACCAAAGCTTGGAGGTGAGAACAAGTCAGAACCATACAAAATTGTGATGAAGA
>Marker424285
AAAAAATGAACAATGAACTCCTTCACTAAATTGAAAATGTTTAGGGCAACATACCTTCCTATTCAAGCCTCTAGATTAATAACATGGCTTCTATTTAGCAXXXXXXXXXXTGTTTTACAACTGACAAGATTAC-AGAAGGGCAACACATTTTTATTTTATTACAATAAACAACAAAATTTATGTAACTTTAAGGGGTTTTAATTAATGACA
AAAAAATAAACAATGAACTCCTTCACTAAATTGAAAATGTTTAGGGCAACATACCTTCCTATTCAAGCCTCTAGATTAACAACATGGCTTCTATTTAGCAXXXXXXXXXX-GTTTTACAACTGACAAGATTACAAAAAGGGCAACAAATTTTTATTTTATTACACTAAACAACAAAATTTATGTAACTTTAAGGGGTTTTAATTAATGACA
* * * * *
>Marker297384
TCCAGGTTTGCATATAGTTTCTTCTTCATCTACAACATCAACGCTGGTTTGGACAACCTTACCTGAGTTACTTGATGCTTCATTGTTTTCTATCATCTAGXXXXXXXXXXTGCCCTAGCAATCTAGCAACCCTCTAAAGGTATTTTTAAATACCAGCAATCCAAATAGCAAAGCAAACAGCAACAAACCCAACTAATCAAGAAACACACG
TCCAGGTTTGCATATAGTTTCTTCTTCATCTACAACATCAACGCTGGTTTGGACAACCTTACCTGAGTTACTTGATGCTTCATTGTTTTCTATCATCTAGXXXXXXXXXXTGCCCTAGCAATCTAGCAACCCTCTAAAGGTATTTTTAAATACCACCAATCCAAATAGCAAAGCAAACAGCAACAAACCCAACTAATCAAGAAACACACG
*
>Marker204328
AAATCAAATGTAGACTTGTTCTTGCCATATTTAAAGAAACAAAGGTTATTAGTGTTGAAGTTGAAGAGCCTAGAAACATCAAAATAGAAGATGAAA---TTG--T-XXXXXXXXXXTAAAGGAGCCAAGGGGTTCTTATGAAGATCATCATAGGGAAAAATCTTGAAGGGGGATGATGATCTAGAAAAGGTAGATGAACATCACCACTTGGCTAGG
AAATCAAATGTAGACTTGTTCTTTCCATATTTAAAGAAACAAAGGTTATTAGTG------TTGAAGAGCCTAGAAACATCAAAATAGAAGATGAAATTGTTGACTAXXXXXXXXXXTAAAGGAGCCAAGGGGTTCTTACGAAGATCATCATAGGGAAAAATCTTGAAGGGGGATGATGATCTAGAAAAGGTAGAGGAACATCACCACTTGGCTAGG
* * *
>Marker484951
ATCTATGTATTCATCAATGTTTATATTTTTTGTTTGGAATCAAGTTTTCATAATAATCTTCATTGTCTCTTTATTTGGAAAATCTACTTGCAAGAGTCTTXXXXXXXXXXACGAATTGATAAAAGAAATGTTTGATCATGACCAAGATATGTCTCGGGAGGGTTTGGGGCTGCACATCTCTCACAAACTCGTTAAAATAATGAATGGAGA
ATCTATGTATTCATCAATGTTTATATTTTTTGTTTGGAATCAGGTTTTCATAATAATCTTCATTGTCTCTTTATTTGGAAAATCTACTTGCAAGAGTCTTXXXXXXXXXXACGAATTGATAAAAGAAATGTTTGATCATGACCAAGATATGTCTCGGGAGGGTTTGGGGCTGCACATCTCTCACAAACTCGTTAAAATAATGAATGGAGA
*
>Marker370321
CTTGAGGAACAAAGAATTGTCTTGCAATCAGATGATGAATTATTACTATTGTGAGTTTATTGTTGGTTTTTAAAGTTTCTCTTCGTTTCAAGAATATAAAXXXXXXXXXXGTCACCACTATAGGCAAACAAATTTGAGTTAACAAAAATTGAGATAGGTATTTATAGATGGACCTGACATCCACCTATAGGTGCAAATGAGACATTCCTA
CTCGAGGAACAAAGAATTGTCTTGCAATCAGATGATGAATTATTACTATTGCGAGTTTATTGTTGGTTTTTAAAGTTTCTCTTCGTTTCAAGAATATAAAXXXXXXXXXXGTCACCACTATAGGCAAACAAATTTGAGTTAACAAAAATTGAGATAGGTATTTATAGATGGACCTGACATCCACCTATAGGTGCAAATGAGACATTCCTA
* *
>Marker382659
CACAAAACTAAATAGCCTACACAAATGTGAACCCCAATCCACATAACTAAACCATGAAAATGATAGGTGGGCATGGAACTAATAGGCAAACATGATACCAXXXXXXXXXXACCTTGGTTTGTTGTTATGTCTCGTAGTATATTTGATGATTGCCACGTATTTGCATCATGGAGGTAAGTTCCTTTCTTTGATGGTGTGTGTATGCTAAGT
CACAAAACTAAACAGCCTACACAAATGTGAACCCCAATCCACATAACTAAACCATGAAAATGATAGGTGGGCATGGAACTAATAGGCAAACATGATACCAXXXXXXXXXXACCTTGGTTTGTTGTTATGTCTCGTAGTATATTTGATGATTGCCACGTATTTGCATCATGGAGGTAAGTTTCTTTCTTTGATGGTGTGTGTATGCTAAGT
* *
>Marker385865
CGAGAGCGAGTAATACAACACTGTTCCATTCACGTTTATGTATAAACAATTAACTATGTTGAACAAGGTATCTGATATTAATCAACAACATAAAACATTCXXXXXXXXXXAGAGATAAAAAGTGCCTACTTAGCACTTTTCCCTTTCATTTAGCATCTACTCATAGCCTCTTTATTTAATAAAAATGACAATGATCTTTTGATTATTTGT
CGAGAGCGAGTAATACAACACTGTTCCATTCACGTTTATGTATAAACAATTAACTATGTTGAACAAGGTATCTGATATTAATCAACAACATAAAACATTCXXXXXXXXXXAGAGATAAAAAGTGCCTACTTAGCACTTTTCCCTTTCATTTAGCATCTACTCATAGCCTCTTTATTTAATAAACATGACAATGATCTTTTGATTATTTGT
*
>Marker136145
AATAGGATTCAAAACTAGCAGGTCATATTCTAAAATATACAAAATGTAAAGGCTATTCGGCCTTATACACACACAATAATAAACAAAGCCTATCAGCCTTXXXXXXXXXXATGTCCCTCACAGAAAAGCATATTGCAATACTCATTGTGTCTGTTTTCAGGTCTTGTGAGAATCTCTCGTAAGTTAGACTTCCTTCTCACATATGCTCGA
AATAGGATTCAAAACTAGCAGGTCATATTCTAAAATATACAAAATGTAAAGGCTATTCGGCCTTATACACACACAATAATAAACAAAGCCTATCAGCCTTXXXXXXXXXXATGTCCCTCACAGAAAAGCGTATTGCAATACTCATTGTGTCTATTTTCAGGTCTTGTGAGAATTTCTCGTGAGTTAGACTTCCTTCTCACATATGCTCGA
* * * *
>Marker256712
AATCTTTGTTCTTGAATTGACTAGATTTTGTCACTAATGTTTGCATGATTTTGTGAAAAGATATGTGTGTTGATACAGGTTTTTGAGTATGGCTTAGTGGXXXXXXXXXXAGATTTTGGGAGTGATATAGATTATCTTTTTATTATTCAAATAGTCATGCTACGAATGAATAGAATTAGATTTTGCTCTGCGTAAAAATAAGTGTTATTG
AATCTTTGTTCTTGAATTGACTAGATTTTGTCACTAATGTTTGCATGATTTTGTGAAAAGATATGTGTGTTGATACAGGTTTTTGAGTATGGCTTAGTGGXXXXXXXXXXAAATTTTGGGAGTGATATAGATTATCTTTTTATTATTCAAATAGTCATGCTACGAATGAATAGAATTAGATTTTGCTCTGCGTAAAAATAAGTGTTATTG
*
>Marker141256
CCAAGAGACTGAAGAAGGAGAAGTGTCAAGAGTTGGGCTCAAAGAGCTCTCTTCAAAGTGAACTCTCCTCTTGATGAACAACTCATGAGTAACTGGATGAXXXXXXXXXXCTAGAGTAGATCATGCAATTCACTATTTCGTTCAAGGATCTATTTTTACATTTTGCTAAGGATTGTATAAAACTATATGCTACAAGTTAATCCTCTCTGA
CCAAGAGACTGAAGAAGGAGAAGTGTCAAGAGTTGGACTCAAAGAGCTCTCTTCAAAGTGAACTCTCCTCTTGATGAACAACTCATGAGTAACTGGATGAXXXXXXXXXXCTAGAGTAGATCATGCAATTCACTATTTCGTTCAAGGATCTATTTTTACATTTTGCTAAGGATTGTATAAAACTATATGCTACAAGTTAATCCTCTCTGA
*
>Marker248128
TAAATAGTAGTTCAACCCTTTTTGTTTATCGGATGACCGGACATTGTGAATAATGTTTGCTTCTGGCTATGGCCACACATATACTCTTTTACTATTACGAXXXXXXXXXXTGACCATCTCACTCTCTTTATGCTGTTGTAGATATGTTTTGTCTCGCCATTGAGGGCCTTCCAATTCTCCTTAGTGCATTTTGTATTGACAAATGCGCAT
TAAATAGTAGTTCAACCCTTTTTGTTTATCGGATGACTGGACATTGTGAATAATGTTTGCTTCTGGCTATGGCCACACATATACTCTTTTACTATTACGAXXXXXXXXXXTGACCATCTCACTCTCTTTATGCTGTTGTAGATATGTTTTGTCTCGCCATTGAGGGCCTTCCAATTCTCCTTAGTGCATTTTGTATTGACAAATGCGCAT
*
>Marker378767
AGGAAAGTAAACCAGGTGCATCCACTTATTCAGCGGGGGAACCTAACTATGCATGAAAAGTAAATCCAGGTGCATCCACTTATTTAGTGGGAACCTGGGCXXXXXXXXXXTAATACAAATCAAACAGAAGTAACATAATGCATTCAACTGTTATACCATAGAAGGTGACTGCTATTATGTTGCTGCAATCAGAAAGGCTCCATTTTCTGC
AGGAAAGTAAACCAGGTGCATCCACTTATTCAGCGGGGGAACCTAACTATGCATGAAAAGTAAATCCAGGTGCATCCACTTATTTAGTGGGAACTTAGGCXXXXXXXXXXTAATACAAATCAAACAGAAGTAACATAATGCATTCAACTGTTATACCATAGAAGGTGACTGCTATTATGTTGCTGCAATCAGAAAGGCTCCATTTTCTGC
* *
>Marker348148
CGAGCTATCAAAGAATAATGTCCAGATTCAGGGTATATCTACTGTGAATATTGATTCATCAAGGAAAATGATGACCATAGGATGGTCTGTTGGTGTAGGTXXXXXXXXXXTATCCCACTAATGTTCTACTAATATAATAGATTTCCCTTTCTTTTCCTTCCTCATCATTTTGTGCTAATAATGCCCCCAATGCTAAATTGGTTGTTGATA
TGAGCTATCAAAGAATAATGTCCAGATTCAGGGTATATCTATTGTGAATATTGATTCATCAAGGAAAATGATGACCATAGGATGGTCTGTTGGTGTAGGTXXXXXXXXXXTATCCCACTAATGTTCTACTAATATAATAGATTTCCCTTTCTTTTCCTTCCTCATCATTTTGTGCTAATAATGCCCCCAATGCTAAATTGGTTGTTGATA
* *
>Marker197482
ACAGGTTATGTCTTTACTATAGGTGGGACAACAGTGTGTTAGATCTCTAGGTTGCAAAAGGTGGTTGCTTTATCCACCACGAAGATAGAGTATGTAGCTGXXXXXXXXXXGTTATTTTTCTATTGGCCGACATAAAAAAGACCCTATTTTGTAACCAACATAAGTCTTGATAAAAATAGCTAAGGGTTAGGGTATCTGTTGATATTGTAT
ACAGGTTATGTCTTTACTATAGGTGGGACAACAGTGTGTTAGATCTCTAGGTTGCAAAAGGTGGTTGCTTTATCCACCACGAAGACAGAGTATGTAGCTGXXXXXXXXXXGTTATTTTTCTATTGGCCGACATAAAAAAGACCCTATTTTGTAACCAACATAAGTCTTGATAAAAATAGCTAAGGGTTAGGGTATCTGTTGATATTGTAT
*
>Marker336034
CCTAGGCCCCATTTGACATGGGTTTCAAGGGATTTTGGTCTAGGATTTATTTTTAACATGGGTGATCAAAATCTAAGGGACCTAGGACCTAAACTTCGGAXXXXXXXXXXCAAGGTCCTTAGACCCTTTTCTCCTATGTGGCCTAATCTCTAGTGCCATAATATAGTCTTCTCTGTAGGCAATTTTGATTTGGAAGAAAGATCCCCCTTA
CCTAGGCCCCATTTGACATGGGTTTCAAGGGATTTTGGTCTAGGATTTATTTTTAACATGGGTGATCAAAATCTAAGGGACCTAGGACCTAAACTTCAGAXXXXXXXXXXCAAGGTCCTTAGACCCTTTTCTCCTATGTGGCCTAATCTCTAGTGCCATAATATAGTCTTCTCTGTAGGCAATTTTGATTTGGAAGAAAGATCCCCCTTA
*
>Marker265068
ATCATATACTAAGGGCATGATACTGGTGCACCCTAACTTTCAAGATTGACATAGGATTTACATTATTTATTATTTGAGAAGGCATTTCTTCATTTCACTCXXXXXXXXXXGGAGGATGAGGAGAGGTGGAGGCATCTATTTTACAAGTTGTTTTGAAGGCTAACTGATGGTGGATCAGGAGGATCCCCAATAGTAGTCCAATATTTTATA
ATCATATACTAAGGGCATGATACTGGTGCAACCTAACTTTCAAGATTGACATAGGATTTACATTATTTATTATTTGAGAAGGCATTTCTTCATTTCACTCXXXXXXXXXXGGAGGATGAGGAGAGGTGGAGGCATCTATTTTACAAGTTGTTTTGAAGGCTAACTGATGGTGGATCAGGAGGATCCCCAATAGCAGTCCAATATTTTATA
* *
>Marker363077
TGTCAGGATTATTCCACATTACATCTTCTTATCCTGGAGGTTTATGATAATATTTCAGTCTAGCTCCATTTACATACCCAATTGTTAATTTTCCTTCCATXXXXXXXXXXTGGTAGTATGAAATGTATCGATATTGTGGCATCCATGCCATATATTAATTCATATGGTGTGAAGTTTGTAGTCCTTTTATATGTTGTGCGGTAGGCTTAA
TGTCAGGATTATTCCACATTACATCTTCTTATCCTGGAGGTTTATGATAATATTTCAGTCTAGCTCCATTTACATACCCAATTGTTAATTTTCCTTCCATXXXXXXXXXXTGGTAGTATGAAATGTATCGATATTGTGGCATCCATGCCATATATTAATTCATATGGTGTGAAGTTTGTAGTCCTTTTATATGTTGTGCGGTAGGCCCAA
**
>Marker301278
CTCAATTTTATTACTATGCACCTTTGCTAGCAAACAAGAATTAAATTAAAAAAATGCTTAGTGTGTTCCTTTAGGTGAAGTCCTGTGTCTTTCTAAGAAGXXXXXXXXXXCATAAATTATCACAACTATCCAATATAAGTGTGTTATTTATAAAATAAGGTGCTCATCTAAACAAGTATTGTTGTTATGTGGACAAATACTATTCTTATA
CTCAATTTTATTGCTATGCACCTTTGCTAGCAAACAAGAATTAAATTAAAAAAATGCTTAGTGTGTTCCTTTAGGTGAAGTCCTGTGTCTTTCTAAGAAGXXXXXXXXXXCATAAATTATCACAACTATCCAATATAAGTGTGTTATTTATAAAATAAGGTGCTCATCTAAACAAGTATTGTTGTTATGTGGACAAATACTATTCTTATG
* *
>Marker329210
TCCTGCATCATTCCACTCACCATATCAGTCTCTTGCACTAAAAATTGACCTATGATTGCTCCACATTACCTATCTTTACTAAAAACAACCCACTTTTCTAXXXXXXXXXXATATTACCATAAGCGACTACTTTTCCTATACATGTGACTTGAACTTCTTATCCTAAAACTACTCGCTTCTAGTGACATGTGTGCATTTAGCAAAAGTTTT
TCCTGCATCATTCCACTCACCATATCAGTCTCTTGCACTAAAAATTGACCTATGATTGCTCCACATTACCTATCTTTACTAAAAACAACCCACTTTTCTAXXXXXXXXXXATATTACCATAAGCGACTACTTTTCCTATACAAGTGACTTGAACTTCTTATCCTAAAACTACTCGCTTCTAGTGACATGTGTGCATTTAGCAAAAGTTTT
*
>Marker397308
TTCTTTCAGCTGCTCCCACTTAATGTGGACAGTAGGTGTGTTGCTTTCACTGTGGATTTTAAGGAGTCCATTTTCTTCTTTTCATTTGCACCAGCTTGCTXXXXXXXXXXCTGGATAGAAACAAGAAATGGATTGGATTGTTTTTCTCTGTTAGAATCCATTAACACACTTGTTTTATTTTTTTATTGAGACTGAAGCTTTTTTTCATTG
TTCTTTCAGCTGCTCCCACTTAATGTGGACAGTAGGTGTGTTGCTTTCACTGTGGATTTTAAGGAGTCCATTTTCTTCTTTTCATTTGCACCAGCTTGCTXXXXXXXXXXCTGGATAGAAACAAGAAATGGATTGGATTGTTTTTCTCTGTTAGAATCCATTAACACACTCGTTTTATTTTTTTATTGAGACTGAAGCTTTTTTTCATTG
*
>Marker594309
TTGTCCAACTCAATTCATGATCACATTCAAATTTCAATTCATTCACATTACCAACTACTATCACACCGACCAAACACCAAAGTCATTGTGCATTGTCGTC-XXXXXXXXXXCATTTTCTTCAACTCTGCAATGTAGAAAACAACATTCATTTGCTAAAACTGTGTTAAAAGATGTCCAACTCAAATCATAAGTCTACTTATCCAATAGTTA
TTGTCCAACTCAATTCATGATCAGATTCAAATTTCAATTCGTTCACATTACCATCTACTATCACACCGACCAAACACC-AAGTCATTGTGCATTGTCGTCAXXXXXXXXXXCATTTTCTTCAACTCTGCAATGTAGAAAACAACATTCATTTGCTAAAACTGTGTTAAAAGATGTCCAACTCAAATCATAAGTCTACTTATCCAATAGTTA
* * *
>Marker259685
CTTTCACTTTTTTATCAAGTGTAGCTAACTCAAAATTTCTATTTAGGGTTTACTTTTCTAGAATATTTTATGTGTTTTGACTACATTTTTTGTGTTGTATXXXXXXXXXXTGTGTATATTGCTTAGTTTTAGGTTAGAATTTTTTGGATTAATCTAAATACTTTAATTTGAGCTCTTTTAACAACATGCTTTAAGAAAAACTACCTATTT
CTTTCACTTTTTTATCAAGTGTAGCTAACTCAAAATTTCTATTTAGGGTTTACTTTTCTAGAATATTTTATGTGTTTTGACTACATTTTTTGTGTTGTATXXXXXXXXXXTGTGTATATTGCTTAGTTTTAGGTTAGAATTTTTTGGATTAATCTAAATGCTTTAATTTGAGCTCTTTTAACAACACACTTTAAGAAAAACTACCTATTT
* **
>Marker330951
TTTTCCTTTGATTTGAACACAAAAATCATTTCCAAACTTGACTAATCCACCTGTATAATCTTCAAAATTGATGAACATGCTCTTATCCCCAGTCATGTGGXXXXXXXXXXCTTCTTACAAAACTTGATCTCCTTCTAGATACAATCCTACATTCACTAGCCTTATGTCCATATTGGTTACAATAAAAGAAATAACCAAAGAAAAGTAGAT
TTTTCCTTTGATTTGAACACAAAAATCATTTCCAAACTTGACTAATCCACCTATATAATCTTCAACATTGATGAACATGCTCTTATCCCCAGTCATGTGGXXXXXXXXXXCTTCTTACAAAACTTGATCTCCTTCTAGATACAATCCTACATTCACTAGCCTTATGTCCATATTGGTTACAATAAAAGAAATAACCAAAGAAATGTAGAT
* * *
>Marker304560
AACTGAATTACTATCACCATCTGAATGTGTTGTCAATAGTTAATCAATTTGGCTAAGTTAATCTTACCGGACCAAACATTGTATACATCTTTATCTCAGTXXXXXXXXXXTAGTGCATATTTTAGGAAATCTACTAGCATTATAAATACTACTCTAAAGTCTGAGGAAGAATTTGAAGAACTACCACAATCACTCGATCTCCTAAACCAC
AACTGAATTACTATCACCATCTGAATGTGTTGTCAATACTTAGTCAATTTGGCTAAGTTAATCTTACTGGACCAAACATTGTATACATCTTTATCTCAGTXXXXXXXXXXTAGTGCATATTTTAGGAAATCTACTAGCATTATAAATACTACTCTAAAGTCTGAGGAAGAATTTGAAGAACTACCACAATCACTCGATCTCCTAAACCAC
* * *
>Marker720826
CCCTCCTCCTAAGTTATCCACTAAGATGCTTAAAGCATATGACTTTATTTACCAGCTTCAAAATTCTTAAAGCTAAAATATTCATATGGGACTTAATGCAXXXXXXXXXXTTTGGCATGTTTTTTGCATAAAATCAAAATTGATGCATCTAAGTTACAAAAACTTAACATTACAATCAAAGGGTTTGATAATGTAGGATGAGAATCTACA
CCCTCCTCCTAAGTTATCCACTAAGATGCTTAAAGCATATGACTTTATTTACCAGATTCAAAATACTCAAAGCTAAAATATTCATATGGGACTTAATGCAXXXXXXXXXXTTTGGTATGTTTTTTGCATAAAATCAATATTGATGCATCTAAGTTACAAAAACTTAACATTACAATCAAAGGGTTTGATAATGTAGGATGAGAATCTACA
* * * * *
>Marker605020
TTCACACAACATCGATGAATAAAGGATAATATTCTTCATGCATTTGTCATGTCTTTGCTTTGCTTCAACCATGGCATTATATAACAGCATTTCCACAACTXXXXXXXXXXCTTCAAGGCATTCAAGCTTCTTGAAAATGTATGAAAGAAGGAAAAACACCTGCTTTTGGGCTGGCATTAAAAATGATATCAAAAAACTTGTGGTGGAATG
TTCACACAACATCGATGAATAAAGGATAATATTCTTCATGCATTTGTCATGTCTTTGCTTTGCTTCAACCATGGCATTATATAACAGCATTTCCACAACTXXXXXXXXXXCTTCATGGCATTCAAGCTTCTTGAAAATGTATGAAAGAAGGAAAAACACCTGCTTTTGGGCTGGCATTAAAAATGATATCAAAAAACTTGTGGTGGAATG
*
>Marker326597
CATCTTTTGTGTCAGCCAACTAAACTGTGATATGGAATGTTCAATTCTTATTTCATATTTACATTCTATACCTTCAAAATGAAATTTGGACCTGGGGTAGXXXXXXXXXXGATGATGAATCACACATGGATACAAATCTGTGGATATTGTAAGCGAGCTTAAAGATACAATCAAGCCTGAGGGGCTGGGTAGCAAACTCTACTTGGACGA
CATCTTTTGTGTCAGCCAACTAAACTGTGATATGGAATGTTCAATTCTTATTTCATATTTACATTCTATACCTTCAAAATGAAATTTGGACCTGGGGTAGXXXXXXXXXXGATGATGAATCACACAAGGATACAAATCTGTGGATATTGTAAGCGAGCTTAAAGATACAATCAAGCCTGAGGGGCTGGGTAGCAAACTCTACTTGGACGA
*
>Marker149472
TATATGTTATTATCTATGAACAATATCCTTTCGACATATTTTAAAAAAATTACATAAATTTATATTGAATGAGTAAAACATAATACATTATTACTAATTGXXXXXXXXXXCAGTTTGGGGTATGGAGCCAATATCACCTATACACAAGCTCAAGCTTGTAAACATTACCTATGGTAGGCAAATACAAGAAGTTAATTTCTCATTCTAGAT
TATATGTTATTATCTATGAACAATATCCTTTCGACATATTTTTAAAAAATTACATAAATTTATATTGAATGAGTAAAACATAATACATTATTACTAATTGXXXXXXXXXXCAGTTTGGGGTATGGAGCCAATATCACCTATACACAAGCTCAAGCTTGTAAACATTACCTATGGTAGGCAAATACAAGAAGTTAATTTCTCATTCTAGAT
*
>Marker369136
TAAAGCCAAACCTTGGCTCATGAAAGATGGTCATGCACTTAAAATTGCCAGCAGTCGTGGTGTGGCACTGATTTATTTTTTCAGTTTGCCAATTCTCATTXXXXXXXXXXACATTTTAAATATCTAATTTGATGTGGTTGAGAATAGCTATTTTATCTTGACGGAATTTGTGTATTATCTTTAAGATATATAAATTGTAATAATTTACTA
TAAAGCCAAACCTTGGCTCATGAAAGATGGTCATGCACTTAAAATTGCCAGCAGTCGTGGTGTGGCACTGATTTATTTTTTCAGTTTGCCAATTCTCATTXXXXXXXXXXACATTGTAAATATCTAATTTGATGTGGTTGAGAATAGCTATTTTATCTTGACGGAATTTGTGTATTATCTTTAAGATATATAAATTGTAATAATTTACTA
*
>Marker234746
TATCCCTTCCCCAAGCATCTATGTCCTAGCTCCCACGGCTCTCTATAATAAAAGCACAACTTCTTCCTCTAAAGCTCATTCTTAGTTTCTTCCATCTTGCXXXXXXXXXXTCCTATCAAACCTATCTATGAGCCTCTATGTGAAATCAACATATGTCACACCATGATGATGCCCTTGTGTGATTAACCCATGATGCCACCGCTCATGTGT
TATCCCTTCCCCAAGCATCTATGTCCTAGCTCCCACAGCTCTCTATAATAAAAGCACAACTTCTTCCTCTAAAGCTCATTCTTAGTTTCTTCCATCTTGCXXXXXXXXXXTCCTATCAAACCTATCTATGAGCCTCTATGTGAAATCAACATATGTCACACCATGATGATGCCCTTGTGTGATTAACCCATGATGCCACCGCTCATGTGT
*
>Marker162318
GGAAGGGATCCTATTCCTATAACTTATCCTCTGTTTATAACAAGCGCTTCTCTATTTTTATAATAAAGTTTATAATGTGATAAAAGCTCACACTATGAGCXXXXXXXXXXGAAAGATGAGATACACCTCAATGAAAAGGGTCACTTCCAAGGATTTCTGCTAGGAAAAAATTACAAATTTTTTTACAGATGTTGTAGTTGTAAATACCCT
GGAAGGGATCCTATTCCTATAACTTATCCTCTGTTTATAACAAGCGCTTCTCTATTTTTATAATAAAGTTTATAATGTGATAAAAGCTCACACTATGAGCXXXXXXXXXXAAAAGATGAGATACACCTCAATGAAAAGGGTCACTTCCAAGGATTTCTGCTAGGAAAAAATTACAAATTTTTTTACAGATGTTGTAGTTGTAAATACCCT
*
>Marker233876
TACACCTCATAAGAAGGTATGATTTGTCGTGTGATTTCCAATAGAAATACTGTGTCTGTAGAGCATCACGGAAACATAAAAGGGTTCCCTTTAGATCCCTXXXXXXXXXXACATGCATACACCACATAGGATGTCATGTAGAACATCTGATATCTCTTCTTCCATGATATCATTCCATCATGAGGTTTTTCACTAATGAGCTTGGCCTAA
TACACCTCATAAGAAGGTATGATTTGTCGTGTGATTTCCAATAGAAATACTGTGTCTGTAGAGTATCACGGAAACATAAAAGGGTTCCCTTTAGATCCCTXXXXXXXXXXACATGCATACACCACATAGGATGTCATGTAGAACATCTGATATCTCTTCTTCCATGATATCATTCCATCATGAGGTTTTTCACTAATGAGCTTGGCCTAA
*
>Marker295982
CAACCATGTTTCCTCTATGTGATTAGGAGTGTCAAACTGAAAACAATTAGCCCACTCATCTAGCAGTATATTAGGTATTTCATCCACAGGTGTGGTGGTTXXXXXXXXXXCAGGGAGATCTATAACAAATATATCTTGTGAAACATAGTAGCCAGGGCATGCATGTAAGGTGAGCTCTAAACCTTTAATAAGACATCCTGTCTTGACAAT
CAACCATGTTTCCTCTATGTGATTAGGAGTGTCAAACTGAAAACAATTAGCCCACTCATCTAGTAGTATATTAGGTATTTCATCCACAGGTGTGGTGGTTXXXXXXXXXXCAGGGAGATCTATAACAAATATATCTTGTGAAACATAGTAGCCAGGGCATGCATGTAAGGTGAGCTCTAAACCTTTAATAAGACATCCTGTCTTGACAAT
*
>Marker752066
GAATTTAATAAGTGATTATGAATGACAGTAGCGTTCAGTTTAATGTTTCAACTTCATTTGCCGCTATTGTTTCTCCTAAAATGCTTGAGTATTGCTTTTCXXXXXXXXXXTAATGTTTCCTTCGTCTTTTTCCACTGCAAATCCAAACAAGGAAAACACCCAAATTAATCTTCTGCTGAAATGCATTGAAATCAAAAGGACATATAGCAG
GAATTTAATAAGTGATTATGAATGACAGTAGCCTTCAGTTTAATGTTTCAACTTCATTTGCCGCTATTGTTTCTCCTAAAATGCTTGAGTATTGCTTTTCXXXXXXXXXXTAATGTTTCCTTCGTCTTTTTCCACTGCAAATCCAAACAAGGAAAACACCCAAATTAATCTTCTGCTGAAATGCATTGAAATCAAAAGGATATATAGCAG
* *
>Marker153318
TAATTGTAATGGATAATAATGAAGTTATGAGAATGATATGGACCTATATATGCCTAACACACTTGTTTTGCAAGGTGAAGACAAGGGAAATGATGAAAGCXXXXXXXXXXAGCAGCTAGTGTTCTGAAATGGACTTTGACACTACAAGCAATGGTTTGAGCTTATCTCCACTACACATAATGACACCTTGCTGGTTATATGTATGGAGCT
TAATTGTAATGGATAATAATGAAGTTATGAGAATGATATGGACCTATATATGCCTAACACACTTGTTTTGCAAGGTGAAGACAAGGGAAATGATGAAAGTXXXXXXXXXXAGCAGCTAGTGTTCTGAAATGGACTTTGACACTACAAGCAATGGTTTGAGCTTATCTCCACTACACATAATGACACCTTGCTGGTTATATGTATGGAGCT
*
>Marker351776
TGTGGAAGATGGAAAGTATACGGATCAGTAATATGAGTGTATGCAAAGATTCTACATATCTCAGTGTCTCTAGGTTGAAGCACATGCAAATCTCTCTTGTXXXXXXXXXXTAGAATGCCTTGTTTTCATCATTTCAACATGTTTCGTCTTTTGCGGATGCATATAATGATCATATATTTCAAGTGAATGGTGTAAGGATAGTGATGATAA
TGTGGAAGATGGAAAGTATACGGATCAGTAATATGAGTGTATGCAAAGATTCTACATATCTCAGTGTCTCTAGGTTGAAGCACATGCAAATCTCTCTTGTXXXXXXXXXXTAGAATGCCTTGTTTTCATCATTTCAACATGTTTCTTCTTTTGCGGATGCATATAATGATCATATATTTCAAGTGAATGGTGTAAGGATAGTGATGATAA
*
>Marker275998
TCCAGAATGCACAACCACAATCTAAGAGTGACAAGTTGCATAACTTGAATACACAAAAGGGGCTAGGATCATAAGAAAGGAGCCTTCCATCTGTTGTTGCXXXXXXXXXXGGTATATTTGCATACTCAGGCATATACCTTGTATCTCCCATTAATGTGTCCCTTGGCTCCTCAAATTTCATATGGTCAATTTTGGCCAAGGTATTGTGAA
TCCAGAATGCACAACCACAATCTAAGAGTGACAAGTTGCATAACTTGAATACACAAAAGGGGCTAGGATCATAAGAAAGGAGCCTTCCATCTGTTGTTGCXXXXXXXXXXGGTATATTTGCATACTCAGGCATATACCTTGTATCTCCCATCAATGTGTCCCTTAGCTCCTCAAATTTCATATGGTCAATTTTGGCCAAGGTATTGTGAA
* *
>Marker98428
ATTGAATGAGAATTATATATAAAGGAGATATAAGGGTTATGATATAATTGTATGTGTATTATGAATGATTTACTCTACTTAGATTGTATTGTATAACAAAXXXXXXXXXXCTTTCTATACCATTTTAAAGTATCATTCTGCAATGTCCCAATAAAGTCAAATAATTTAGTATTGTCCTTGGTTATCTCATTCCAGCTCCAAATTGATTCT
ATTGAATGAGAAATATATATAAAGGAGATATAAGGGTTATGATATAATTGTATGTGTATTATGAATGATTTACTCTACTTAGATTGTATTGTATAACAAAXXXXXXXXXXCTTTCTATACCATTTTAAAGTATCATTCTGCAATGTCCCAATAAAGTCAAATAATTTAGTATTGTCCTTGGTTATCTCATTCCAGCTCCAAATTGATTCT
*
>Marker596110
CATTATTCCTTGCATTCTAATATCATTTGATCTTTACTAAATTCCTATAATGGTTTCATGACCATCCCCATTTGCCTTCTTAAAAATGAAAAAAAAATGC---XXXXXXXXXXAGTATCTGAAGGAGAACACGAAGAAGAAAATGTGAAGATTTGATTGGGCTAAAGGATTGACCAATAATCACTAGTGCAATAATGAGGTAATCCAGAGCCC
CATTATTCCTTGCATTC---TATCATTTGATCTTTACTAAATTCCTATAATGGTTTCATGACCATCCCCATTTGCCTTCTTAAAAATGAAAAAAAAATGCTTGXXXXXXXXXXAGTATCTGAAGGAGAACACGAAGAAGAAAATGTGAAGATTTGATTGGGCTAAAGGATTGACCAATAATCACTAGTGCAATAATGAGGTAATCCGGAGCCC
*
>Marker217432
ACACATATTGACAAAGTGAGATGATAGGAAGACTACGAAGAACAAGAGGAATAAATTTTATTTAGAAAGTTTCTCCAAGAATGGTCAGGAAATGATCGTTXXXXXXXXXXCTAGGTTTTTTGTCACCAAAAATTCACTTGCACAAGATGCAACAACATACTCATACTGGCATGGACACACACATGCAAGAGGAATGCCAAGTAGACTAGG
ACACATATTGACAAAGTGAGATGATAGGAAGACTACGAAGAACAAGAGGAATAAATTTTATTTAGAAAGTTTCTCCAAGAATGGTCAGGAAATGATCGTTXXXXXXXXXXCTAGGTTTTTTGTCACCAGAAATTCACTTGCACAAGATGCAACAACATACTCATACTGGCATGGACACACACATGCAAGAGGAATGCCAAGTAGACTAGG
*
>Marker159939
AGGATTGAAACTAGGTAACAAGTCTGTTCAGGAGTATATAGAAGATTTTTATAAGATTATTATCAGAATTGGCCATGGAGAGGCCAACAAGGAGAGGGTAXXXXXXXXXXTGAGAAAAGAGGAACATGATGAGGAAGACTTGGACAAGGACTGGAAGAGGAGGCTTCAACCTATTTCCAATGTGGAGAAGAAGGACTTCAAGCCTATGAG
AGGATTGAAACTAGGTAACAAGTCTATTCAGGAGTATATAGAAGATTTTTATAAGATTATTATCAGAATAGGCCATGGAGAGGCCAACAAGGAGAGGGTAXXXXXXXXXXTGAGAAAAGAGGAACAGGATGAGGAAGACCTAGACAAGGACTGGAAGAGGAGGCTTCAACCTATTTCCAATGTGGAGAAGAAGGACTTCAAGCCTATGAG
* * * * *
>Marker732598
ATGAATAGTTGAGTGAGTCTCGATTCACAGTCAAGGTTGGTGATTTGCTTGTGAATAGTTGAGTGTGTCTCAATTCGCAAGTATTTTGGAGGTTTGACAAXXXXXXXXXXAAATGTTAGTAAGTAGATAAATAAGTTAGTTCTTGAGAAGTTACATTCCCGTAAATAAGTTAAGGTTGGTTCATGGGAATATGTGGCTTTATAAAGCCAT
ATGAATAGTTGAGTGAGTCTCGATTCACAGTCAAGGTTGGTGATTTGCTTGTGAATAGTTGAGTGTGTCTCAATTCGCAAGTATTTTGGAGGTTTGACAAXXXXXXXXXXAAATGTTAGTAAGTAGATAAATAAGTTAGTTCTCGAGAAGTTACATTCCCGTAAATAAGTTAAGGTTGGTTCATGGGAATATGTGGCTTTATAAAGCCAT
*
>Marker363225
ATGCTATGACATAAGTAAGAGAATGTCTTGTCATGTAAGATGTGTAAGGGCATCTATGATGATGTAAGAGTGTGTAAGATATGTAAGAGAATCTATGACAXXXXXXXXXXATGTAGGTTCATGGTTTTGTGAAACCACTTGTGGTTTTCTCTTTTTGGCTTCTTTGTTCATTTGGTGCTTGAGATGAAGGTTTCATATAGGGTATTTGCA
ATGATATGACATAAGTAAGAGAATGTCTTGTCATGTAAGATGTGTAAGGGCATCTATGATGATGTAAGAGTGTGTAAGATATGTAAGAGAATCTATGACAXXXXXXXXXXATGTAGGTTCATGGTTTTGTGAAACCACTTGTGGTTTTCTCTTTTTGGCTTCTTTGTTCATTTGGTGCTTGAGATGAAGGTTTCATATAGGGTATTTGCA
*
>Marker393934
TCATACATTTTCTTCCACTTCCTTCAAGGGCTTCAACTTATGACGAACTCCATCCTTTGTTAGGGAATAGGTATTTGCATGGTCATCATGGACAGCACACXXXXXXXXXXCACACTTGCAAAATAAACTCTTCCTTTGATCTGGTTCTTTCTCAAGGTTCTTCTAACAACTAGGGTTTCTCCCCTTTCAGCATCTTTAGAATGCTCAGAT
TCATACATTTTCTTCCACTTCCTTCAAGGGCTTCAACTTATGACGAACTCCATCCTTTGTTAGAGAATAGGTATTTGCATGGTCATCATGGACAGCACACXXXXXXXXXXCACACTTGCGAAATAAACTCTTCCTTTGATCTGGTTCTTTCTCAAGGTTCTTCTAACAACTAGGGTTTCTCCCCTTTCAGCATCTTTAGAATGCTCAGAT
* *
>Marker680921
AAACTCATGGATTATGATATCCATGCATAAAAAACAAAAATCAAAACATGTAGTCATTAACTATGGTAGAGAGGAGCTTGTATCACTCAACCCAGCATCAXXXXXXXXXXCTAGCAGGGTTGAGGGGCGGCTCTTTGAGACTTTCATGGCACATGCCAATTTTCATTGTTTTATTGTTTTTAACCAAGCTCAAAGAATTTAGATGCCACA
AAACTCATGGATTATGATATCCATGCATAAAAAACAAAAATCAAAACATGTAGTCATTAACTATGGTAGAGAGGAGCTTGTATCACTCAACCCAGCATCAXXXXXXXXXXCTAGCGGGGTTGAGGGGCGGCTCTTTGAGACTTTCATGGCACATGCCAATTTTCATTGTTTTATTGTTTTTAACCAAGCTCAAAGAATTTAGATGCCACA
*
>Marker421201
TGGTAGCATAGGTTTTAGACCATTTGGTAGGCTATTATTAATTTGAAGTTTACTCATTTTTCCTAGTGCATTCTTTACTAGGGTATTCTATTAGCTTTAGXXXXXXXXXXGAAAGATATGAATTATTCATCTTTTTTGGATGTATTGTTAGTAGAATTTTATTTTTGATTCTAAATCTATGATATGTTATAATGTGTTGATGAACATATA
TGGTAGCATAGGTTTTAGACCATTTGGTGGGCTATTATTAATTTGAAGTTTACTCATTTTTCCTAGTGCATTCTTTACTAGGGTATTCTATTAGCTTTAGXXXXXXXXXXGAAAGATATGAATTATTCATCTTTTTTGGATGTATTGTTAGTAGAATTTTATTTTTGATTCTAAATCTATGATATGTTATAATGTGTTGATGAAAATATA
* *
>Marker758751
ATCACGGCTGCCCACTAGAAATCAGCTACATATGCATCCATTGAACCCTAGTGTTGCAGTTACTCCAATTCTCTAAAGTGCTCCTCTTGGCCTTGCCTCTXXXXXXXXXXATGAGATGATTGTGAGCTTCCCCAACCTACTTTGCAAATCTTTGCCGGGTCTGTTTAGGGTGGGTTTACTTTCATTCTTGGTCTTGGTTTTTGCCTTCAA
ATCACGGCTGCCCACTAGAAATCAGCTACATATGCATCCATTGAACCCTAGTGTTGCAGTTACTCCAATTCTCTAAAGTGCTCCTCTTGGCCTTGCCTCTXXXXXXXXXXATGAGATGATTGTGAGCTTCCCCAACCTACTTTGCAAATCTTTGCCAGGTCTGTTTAGGGTGGGTTTACTTTCATTCTTGGTCTTGGTTTTTGCCTTCAA
*
>Marker249666
TGGATTGGACTTTGACCACTTGGTCCAAGTATTAGATCATGGTTTTGAGTGCATGGTTTTGGACGTTTATAGTTTCCTCTATTTCCTTGGCTTGTATGTTXXXXXXXXXXGCTATTACTCTACTAAAATTGTTATAAATCTATTTACTTGCATTGTTCTCTCGACTAGATTAGCTAGGAAATTATTAAACTTTTCCTTTCGAACCTTCTA
TGGATTGGACTTTGACCACTTGGTCCAAGTATTAGATCATGGTTTTGAGTGCATGGTTTTGGACGTTTATAGTTTCCTCTATTTCCTTGGCTTGTATGTTXXXXXXXXXXGCTATTACTCTACTAAAATTGTTATAAATCTATTTACTTGCATTGTTCTCTCGACTAGATTAGCTAGGAAATTATTGAACTTTTCCTTTCGAACCTTCTA
*
>Marker441375
TACCCTCATTTACTCATGATTTTAGAATTGTCAACCATAAATGTCACTCCATAATTACCTCCAGTAAGTCCAGAATTACCACTACCGGTGAAACTACCTCXXXXXXXXXX-TAACACACATATCACAAGGATTTTTACATGGAAACCTTGTTAAGGGAAAAACCACGGGGTGACTAACCCAAGATTGTATTCTCTGTTAAAAGAATAAAGG
TACCCTCATTTACTCATGATTTTAGAATTGTCAACCATAAATGTCACTCCATAATTACCTCCAGTAAGTCCAGAATTACCACTACCGGTGAAACTACCTCXXXXXXXXXXTTAACACACATATCACAAGGA-TTTTACATGGAAACCTTGTTAAGGGAAAAACCACGGGGTGACTAACCCAAGATTGTATTCTCTGTTAAAAGAATAAAGG
>Marker191876
AGGGTGGCAAGGGATCTGTGTATCTCCCAAATAATTATGCCAAATTTATTTCATGGATTTCATGCCCTGCGAAGTGACATAATTGCGTGAATGGAATTATXXXXXXXXXXTTCGTGTGGGGGTATTGGATTTGAAGTCTCTGAGGAAGTCATAGGGCAAGCCATGGGTTACCCATCAAGGATAAGAAGCACAACCGTCGTAGCAAGGTGT
AGGGTGGCAAGGGATCTGTGTATCTCCCAAATAATTATGCCAAATTTATTTCATGGATTTCATGCCCTGTGAAGTGACATAATTGCGTGAATGGAATTATXXXXXXXXXXTTTGTGTGGGGGTATTGGATTTGAAGTCTCTGAGGAAGTCATAGGGCAAGCCATGGGTTACCCATCAAGGATAAGAAGCACAACCGTCGTAGCAAGGTGT
* *
>Marker545300
AGAAGGGGAAAGAAAACTAGAACTCCTTACAAAACCAAAATACTATAACCATCCCATAAAACTAAGAGAAGAAAATGTAGCAAAAGAAGGAGAACCCAAAXXXXXXXXXXATAAAGCCTATGCAGGATGTTGAATGGATAAGCCCCATGGTTGTGGAAAACAAGAAAACATGAGAGATAAGAATATGTGTAGACTATTATCAATCAGATA
AGAAGGGGAAAGAAAACTAGAACTCCTTACAAAACCAAAATACTATAACCATCCCATAAAACTAAGAGAAGAAAATGTAGCAAAAGAAGGAGAACCCAAAXXXXXXXXXXATAAAGCCTATGGAGGATGTTGAATGGATAAGCCCCATGGTTGTGGAAAACAAGAAAACATGAGAGATAAGAATATGCGTAGACTGTTATCAATCAGATA
* * *
>Marker380981
AAGTTTGACATATCTTCATACCTTAGGCTATAAACAAAATGTTTATCCTTATTTGCAAAAAGTGAATTTGTTGATATATCCTCAACATCTTCATTGTTATXXXXXXXXXXTTCCTTTTTAGGTCCCTCTTGTTTTTTTATTACTTCCACAGCCTCTCCTTGTGAATTTGATTCTTCTTCATCAATTCCTTCCTTCTTTTGTTGGGAAACT
AAGTTTGACATATCTTCATACCTTAGGCTATAAACAAAATGTTTATCCTTATTTGCAAAAAGTGAATTTGTTGATATATCCTCAACATCTTCATTGTTATXXXXXXXXXXTTCCTTTTTAGGTCCCTCTTGTTTTTTTATTACTTCCACAGCCTCTCCTTGTGAATTTGATTCTTCTTCATCATATCCTTCCTTCTTTTGTTGGGAAACT
**
>Marker600616
CATTGTTGGGGAAAAAATATTTGTCAACCTTTAAGAGAAGCCATATTCCAGATAGTTGTTGGTTGAATCGAATTATTCATTTTGTTAAAGAACAATCATTXXXXXXXXXXCTGAGCCAAGTAAGATGTTCTAAGTCATTTACTTCAAATGGAGCATTCCATTTTTATACCCACTTCATATACAATATATAGTAAGGACCTT-----ATAAGTAGT
CATTGTTGGGGAAAAAATACTTGTCAACCTTTAAGAGAAGCCATATTCCAGATAGTTGTTGGTTGAATCGAATTATTCATTTTGTTAAAGAACAATCATTXXXXXXXXXX-----CCAAGTAAGATGTTCTAAGTCATTTACTTCAAATGGAGCATTCCATTTTTATACCCACTTCATATACAATATATAGTAAGGACCTTGACACATAAGTAGT
*
>Marker277072
AAACATTTGTAAAATATGTTGTTCAATTTATTGTCATACTCCACCAAGTGCTTAAGCTGCATCAAAGCTCATTGGTGATCCAGTGGCTGGGCTTCAATTTXXXXXXXXXXTTTCTTCACATCTTCATGTGTGCTGTAATTAAATGTGATTTGACCATCTTGATCTGTTGTTGAAACAGTGAGAATGTGGGATTAATTTTCCTTTGTGGCA
AAACATTTGTAAAATATGTTGTTCAATTTATTGTCATACTCCACCAAGTGCTTAAGCTGCATCAAAGCTCATTGGTGATCCAGTGGCTGGGCTTCAATTTXXXXXXXXXXTTTCTTCACATCTTCATGTGTGCTGTAATTAAATGTGATTTGACCGTCTTGATCTGTTGTTGAAACAGTGAGAATGTGGGATTAATTTTCCTTTGTGGCA
*
>Marker342820
CTATGATGAAGCCATATGATGCAAAGCTCCAAAATCAAGGATCCATCTCCCTAACTCAGAATCTATAACTACAAGTGTTTGCCCCTTTTGTTTCTTTAAAXXXXXXXXXXGTTGTTGTTTGTTCTTCTTAGGCTTGTTCTTTTTCTTCTCTATGCCACTAGAAGCCTTCTCATCCTTTCCAATCAAGGCTTGTGATTTTGAAGACTTCAA
CTATGATGAAGCCATATGATGCAAAGCTCCAAAATCAAGGATCCATCTCCCTAACTCAGAATCAATAACTACAAGTGTTTGCCCCTTTTGTTTCTTTAAAXXXXXXXXXXGTTGTTGTTTGTTCTTCTTAGGCTTGTTCTTTTTCTTCTCTATGCCACTAGAAGCCTTCTCATCCTTTCCAATCAAGGCTTGTGATTTTGAAGACTTCAA
*
>Marker389120
AGCTAGCCCTAATCTTAAATCTAACATTAATTATGATAATCTTCCACTTTAGATCAAAATTGGCCTAGATCCCAAAATTTCTACTTTGCTGGACTAGGCCXXXXXXXXXXCCCACCACACTTGTGTGCTTTTCATTTCTAAAATCTTAGTTTTGGATTGCAATCCACCATTATCCTTGGCCTAAATTCTTGCTTACATCAAAGATCTCAA
AGCTAGCCCTAATCTTAAATCTAACATTAATTATGATAATCTTCCACTTTAGATCAAAATTGGCCTAGATCCCAAAATTTCTACTTTGCTGGACTAGGCCXXXXXXXXXXCCCACCACACTTGTGTGCTTTTCATTTCTAAAATCTTAGTCATGGATTGCAATCCACCATTATCCTTGGCCTAAATTCTTGCTTACATCAAAGATCTCAA
**
>Marker537211
CGTAAGTTGCATTAATACATGTAAGTAGACAATTGAGAAGGGGATTCGGTGTATCCCATACTACATCGTGAGTCCGTCCACCATCCCAAGGTCATCAAGTXXXXXXXXXXTGGCAGGAAAGATGTTCTGATACCACTTGTAATGTCCCTTATAGGAACAATACTAATTTTACCCTAAATTATCAATTTCCAAGTAAACAAAGATTTAGAG
CGTAAGTTGCATTAATACATGTAAGTAGACAATTGAGAAGGGGATTCGGTGTATCCCATACTACATCGCGAGTCCGTCCACCATCCCAAGGTCATCAAGTXXXXXXXXXXTGGCAGGAAAGATGTTCTGATACCACTTGTAATGTCCCTTATAGGAACAATACTAATTTTACCCTAAATTATCAATTTCCAAGTAAACAAAGATTTAGAG
*
>Marker420572
TTGCTGGGACGTATGCATTAAGCACAAATTGTGCATTTGTATTTGCTCTCCCTATGTTTGACATTTTTTTTACAAACGTATTATTCCATATTTGTGATGGXXXXXXXXXXTATTTGCAAGACTATCATTTTGATTTTCTACATTGTTTTGTGTGGTAGTGCCTATGTATAATAGCCATCTCAGGATCTAGATTCTCGTTGTCACAAGTAA
TTGCTGGGACGTATGCATTAAGCACAAATTGTGCATTTGTATTTGCTCTCCCTATGTTTGACATTTTTTTTACAAACGTATTATTCCATATTTGTGATGGXXXXXXXXXXTATTTGCAAGACTATCATTTTGATTTTCTACATTGTTTTGTGTGGTAGTGCCTATGTATACTAGCCATCTCAGGATCTAGATTCTCATTGTCACAAGTAA
* *
>Marker435926
ATATCAAAATTCTTATTCTTAGACAATGCAAACTAAAGGCCTGCTTTGCAGTCAATTGACCTAGACATGTTTGAAATCAATCACTGCATTGGACTCTTACXXXXXXXXXXCCAAAAATGTTTGTTCATCCATCTCAATGTTTGGAGATCCACTGCAAGCATATAATATTAGCTAAGATGCTATCTACTTCTAATAGGAAAATTACATAAC
ATATCAAAATTCTTATTCTTAGACAATGCAAACTAAAGGCCTGCTTTGCAGTCAATTGACCTAGACATGTTTGAAATCAATCACTGCATTGGACTCTTACXXXXXXXXXXCCAAAAATGTTTGTTCATCCATCTCAATGTTTGGAGATCCACTGCAAGCATATAATATTAGCTAAGATGCTATCTACTTCTAATAGAAAAATTACATAAC
*
>Marker245348
AGTGGGGATTATGCAGAGGTTCTTAATATTTTCCTTTGTTCCAAATTATTTGGAAAGTTTGTCCTATTTACTAGAGATGAGATGGCTTCAAAATGTGATGXXXXXXXXXXAAAATTAAGGATGGTCTTTTAATGTTTTATTAATAATTCTTATGGTGAAATTTCCATGTCCATGCCATTTCCCATTTAGATTTGTGCTTATTTTGAGGGA
AGTGGGGATTATGCAGAGGTTCTTAATATTTTCCTTTGTTCCAAATTATTTGGAAAGTTTTTCCTATTTACTAGAGATGAGATGGCTTCAAAATGTGATGXXXXXXXXXXAAAATTAAGGATGGTCTTTTAATGTTTTATTAATAATTCTTATGGTGAAATTTCCATGTCCATGCCATTTCCCATTTAGATTTGTGCTTATTTTGAGGGA
*
>Marker646600
TTTAGAGTAGGATTTTTTTGTGCCTTTGAAATATTGGGGTTTTTCTTGGGGATCCATATTCAAAGGTAATGCATTTAGAATAAGTGGAAATGGGATTTTCXXXXXXXXXXATAATTATCAAGTTTGAAATGAATTGACTTAGAAATAGGTATATATGCATCTCTATTTACTTTCACAATTCTCTCTCAATGAACATACTTGAATTATTAA
TTTAGAGTAGGATTTTTTTGTGCCTTTGAAATATTGGGGTTTTTCTTGGGGATCCATATTCAAAGGTAATGCATTTAGAATAAGTGGAAATGGGATTTTCXXXXXXXXXXATAATTATCAAGTTTGAAATGAATTGACTTAGAAATAGGTATATATGCATCTCTATTTACTTTCATAGTTCTCTCTCAATGAACATGCTTGAATTATTAA
* * *
>Marker783418
ACTCAACTAGTTGTATCCAATAAAAGTGATATTTACCAACCCAGAATATTAAATACAGAACATGGGAATATTTACTATTTGAAGGAATACAACAATAGTAXXXXXXXXXXTCCACTGCAATCATAATTTACAATAAAAGAAGATCAATGATCTACCTAGGAATGATTCATCCACACGAACATGATTTAATTGTCGATGTTGGGCCATCGC
ACTCAATTAGTTGTATCCAATAAAAGTGATATTTACCAACCAAGAATATTAAATACAGAACATGGGAATATTTACTATTTGAAGGAATACAACAATAGTAXXXXXXXXXXTCCACTGCAATCATAATTTACAATAAAAGAAGATCAATGATCTACCTAGGAATGATTCATCCACATGAACATGATTTAATTGTCGATGTTGGGCCATCGC
* * *
>Marker124719
CACAACCTGAAATTAGTCCCATGTTACACGGAATTGCAGTGCTTCACCAGCCTTGCATATGAGTGCAATTCCCAGTGATAACAATAAGTAATTAAGATGTXXXXXXXXXXGGACATCCTTTGAGAAGGTTTATTTGTCCTTCTCATTCTCTCTTTATGGAAGATTTTTTCCCATGGTGTTTTCTTTTTTTCTCCATTTATGAGAGACTAT
CACAACCTGAAATTAGTCCCATGTTACACGGAATTGCAGTGCTTCACCAGCCTTGCATATGAGTGCAATTCCCAGTGATAACAATAAGTAATTAAGATGTXXXXXXXXXXGGACATCCTTTGAGAAGGTTTATTTGTCCTTCTCATTCTCTCTTTATGGAAGATTTTTTCCCACGGTGTTTTCTTTTTTTCTCCATTTATGAGAGACTAT
*
>Marker525305
ACTTGTAATGTCAAAATTGTAGGGTATGCAATTTTTTACTTTACAATTTGAAGGCTTTATGACTAATGCAACACTAATCCATCAACTTCTAACTTATACCXXXXXXXXXXGTCTAAAATGAAGACCAAACCGTTAAAGATTTCATACTAAGGGTGCAAAAAGATTGATCAAGACTATAACCAAAAGAGTTCATCTAGACAAGAAGGGATA
ACTTGTAATGTCAAAATTGTAGGGTATGCAATTTTTTACTTTACAATTTGAAGGCTTTATGACTAATGCAACACTAATCCATCAACTTCTAACTTATACCXXXXXXXXXXGTCTAAAATGAAGACCAAACCGTTATAGATTTCATACTAAGGGTGCAAAAAGATTGATCAAGACTATAACCAAAAGAGTTCATCTAGACAAGAAGGGATA
*
>Marker428347
TGCAAAATGGAGCCAAGATGATGTCAAACAGCATGAAGACAAACCCCAAGAGCTAGAAAAACACAACAATCAGCCATATACTACTATTGTTCATGCAAAAXXXXXXXXXXTTTATGAAAAAATTGATCACCTACAACTGCACTATCATGCTTGCACTTAGAAAATGGATACCTACAACCACACATGATGGAGAAAGTAACTTTTTAAAGA
TGCAAAATGGAGCCAAGATGATGTCAAATAGCATGAAGACAAACCCCAAGAGCTAGAAAAACACAACAATCAGCCATATACTACTATTGTTCATGCAAAAXXXXXXXXXXTTTATGAAAAAATTGATCACCTACAACTGCACTATCATGCTTGCACTTAGAAAATGGATACCTACAACCACACATGATGGAGAAAGTAACTTTTTAAAGA
*
>Marker646123
AGGTGAACCTGTTTCTCTTCTTGGTGTGCCTCACACCCAAAACTGTTACACAACTGGAACAAAACACAGATAGCTAGCCTCTGAAGATTTGGTGTGCCAGXXXXXXXXXXTTGATGTCTTCGTTTGTTGCCATCCTCTCTCTATGCATGAAGGCCCACATGA---CCTCATCAACATTAAACATATCAAAGAAGTAAAATTTTGGATTCAAGT
AGGTGAACCTGTTTCTCTTCTTGGTGTGCCTCACACCCAAAACTGTTACACAACTGGAACAAAACACAGATAGCTAGCCTCTGAAGATTTGGTGTGCCAGXXXXXXXXXX---ATGTCTTCGTTTGTTGCCATCCTCTCTCTATGCATGAAGGCCCACATGACCTCCTCATCAACATTAAACATATCAAAGAAGTAAAATTTTGGATTCAAGT
>Marker328996
AGCTTTGGGATCCAGTGGTTGAGAGAGTTCTCTATAACAGAAGTGTGATCTTCAAAGAGCTCAATCCTTCTTCTATTGTTCTATAGCTAGAGAAAGAAGAXXXXXXXXXXATCGCATACAGAGATATCAAATGACAACCAAATACATAGAAGATTTCAAAGTTTGGTGTGCAGAAAAGTCAGGGACTAATGAGCGGGTGCCCTAGTCCAG
AGCTTTGGGATCCAGTGGTTGAGAGAGTTCTCTATAACAGAAGTGTGATCTTCAAAGAGCTCAATCCTTCTTCTATTGTTCTATAGCTAGAGAAAGAAGAXXXXXXXXXXATCGCATACAGAGATATCAAATGACAACCAAATACATAGAAGATTTCAAAGTTTGGTGTGCAGAAAAATCAGGGACTAATGAGCGGGTGCCCTAGTCCAG
*
>Marker229421
AACCATTGCATACATCAAACTACCAATTGCACTCACATAAGGCACTCTAGTCATGTCCTTTATCTCAGTAGGAGATTTTAGATGGTCTTCAACAAAAAGTXXXXXXXXXXCGTGACCAACCTTTCTTTATGCTTCTCAACACTACCATCTAGACCTATCTTTTTCTTAAACACTCACTTACATCAAACAAGCTTTCAACCATCAGACAAA
AACCATTGCATACATCAAACTACCAATTGCACTCACATAAGGCACTCTAGTCATGTCCTTTATCTCAGTAGGAGATTTTAGACGGTCTTCAACAAAAAGTXXXXXXXXXXCATGACCAACCTTTCTTTATGCTTCTCAACACTACCATCTAGACCTATCTTTTTCTTAAACATTCACTTACATCAAACAGGCTTTCAACCATCAGACAAA
* * * *
>Marker769810
TGGATACCCATTTAGGTGGTTGGGAGATATTAATATTTTGTTAGTCTCCTTGTAACTTACAAATATTAGTTGTAGTGGCATTAAAAAGGGGAGGTGGAGCXXXXXXXXXXTGGGTTTTTGCCATATGATGGTTTTGTAATGTTATGGTTTCCTCTCAACTATTCTCTATATATTGTATAAATTGAATGGAGATCTCACAGGTTATTTAT--------A
TGGATACCCATTTAGGTGGTTGGGAGATATTAATATTTTGTTAGTCTCCTTGTAACTTACAAATATTAGTTGTAGTGGCATTAAAAAGGGGAGGTGGAGCXXXXXXXXXX--------TGCCATATGATGGTTTTGTAATGTTATGGTTTCCTCTCAACTATTCTCTATATATTGTATAAATTGAATGGAGATCTCACAGGTTATTTATAGGTAGACA
>Marker144860
GATGAAAAGCCATCTTCTTTGTCTTAGTTATAAAGTATGGAAGGCTATAGAAACACAATATACCATGCCTCAAAATGGTTTGATGACTGAAGATGAAATCXXXXXXXXXXTTTATATAAAGAGTTGATGAACTTGTCACTAGGATAAAGGGTATGGGAGGAACTCTCACTGATAAGGATGTTGTGATGAAAATTCTTAGATCACTACCAA
GATGAAAAGCCATCTTCTTTGTCTTAGTTATAAAGTATGGAAGGCTACAGAAACACAATATACCATGCCTCAAAATGGTTTGATGACTGAAGATGAAATCXXXXXXXXXXTTTATATAAAGAGTTGATGAACTTGTCACTAGGATAAAGGGTATGGGAGGAACTCTCACTGATAAGGATGTTGTGATGAAAATTCTTAGATCACTACCAA
*
>Marker476107
TACATCATGCATTTTTTGCTAAATGGCAATAAAAATAGTTTCATTTGTTAAGAGATACTTTCCCACCTGGAATGGTTTTATCAGTATTCAACTTTGTAGAXXXXXXXXXXTGAAGATTTGGCAAGAAGGGGTGTGAAAATTGAAAAGAATTTTGCATGGTCAGATGGGTGTGTGTCACAATTCAAAACATCAAGGTCATTTTATGCACTT
TACATCATGCATTTTTTGCTAAATGGCAATAAAAATAGTTTCATTTGTTAAGAGATACTTTCCCACCTGGAATAGTTTTATCAGTATTCAACTTTGTAGAXXXXXXXXXXTGAAGATTTGGCAAGAAGGGGTGTGAAAATTGAAAAGAATTTTGCATGGTCAGATGGGTGTGTGTCACAATTCAAAACATCAAGGTCATTTTATGCACTT
*
>Marker670165
TGACCCTTGCATTTTATCCTCTTCCAATATATAATATGATTTTGAAACCTTTCCACTTCTTCCGAGACTCACTTTTAAAAATTCTCACAAAAATATTTGTXXXXXXXXXXAGATACAACATTGTTATTGTATTTATTGCATCTTCTATTGTTTCTACTTTGTCAAACTTGTGGTGTAGACCACCACCTCATTTTCCTTTACAAACACTAG
TGACCCTTGCATTTTATCCTCTTCCAATATATAATATGATTTTGAAACCTTTCCACTTCTTCCGAGACTCACTTTTAAAAATTCTCACAAAAATATTTGTXXXXXXXXXXAGATACAACATTGTTATTGTATTTATTGCATCTTCTATTATTTCTACTTTGTCAAACTTGTGGTGTAGACCACCACCTCATTTTCCTTTACAAACACTAG
*

## Sheet: LG4
>Marker8575
CATCATATCCCAGTGGTGAAATACACTCTGAGGAAAAGCCTGGCCACCTGTGGCAAGTCTAAGGGTATCTGCAAACTTAAATGATTCAATGACTGGCAAAXXXXXXXXXXCAGATTTCAAAGCAGATACCCCTCATGTTCTCCTCTGCAAGGGCCCCCTCTTTGGATGCCCATTGGAACGCAGCAACAACAGAGTCCTTGATTTCATTCA
CATCATATCCCAGTGGTGAAATACACTCTGAGGAAAAGCCTGGCCACCTGTGGCAAGTCTAAGGGTATCTGCAAACTTAAAAGATTCAATGACTGGCAAAXXXXXXXXXXCAAATTTCAAAACAGATACCCCTCATGTTCTCCTCTGCAAGGGCCCCCTCTTTGGATGCCCATTGGAACGCAGCAACAACAGAGTCCTTGATTTCATTCA
* * *
>Marker87651
GATGTTCTTGGTGATTGTAACATGCTTGTGGATGTCTCTTGATTGTGTTTCTACCTTTTGATTGGTCCATAAAGTGTAATCCAGATCATGCATGAAGCGTXXXXXXXXXXTGTAATGCTGACCTTGATGTTCATTCCAAGGTAGATGAATTGTATAAATACATAAAGTGAAGTCGTGAATGATGTAAGATGATGTGAAGATGTGAAGATA
GATGTTCTTGGTGATTGTAACATGCTTGTGGATGTCTCTTGATTGTGTTTCTACCTTTTGATTGGTCCGTAAAGTGTAATCCAGATCATGCATGAAGCGTXXXXXXXXXXTGTAATGCTGACCTTGATGTTCATTCCAAGGTAGATGAATTGTATAAATACATAAAGTGAAGTCGTGAATGATGTAAGATGATGTGAAGATGTGAAGATA
GATGTTCTTGGTGATTGTAACATGCTTGTGGATGTCTCTTGATTGTGTTTCTACCTTTTGATTGGTCCGTAAAGTGTAATCCAGATCATGCATGAAGCGTXXXXXXXXXXTGTAATGCTGACCTTGATGTTCATTCCAAGGTTGATGAATTGTATAAATACATAAAGTGAAGTTGTGAATGATGTAAGATGATGTGAAGATGTGAAGATA
* * *
>Marker12465
GATGACAAGGAACCACCATGGATATGTAGTTGTATGGGTGATAGTAGATACGGAGGTAGAAGGAACCAAGGATGTGATCTCCAAGGACTACGTCGCATAAXXXXXXXXXXTAGGAGAAGAGTGATATGCTGATGAGACAAGGTGCCCCCAAGTGTAGGTGACATAGAAGATCAACTTACACATGACGCCTGTTTGCCAGGTTTTCATCAT
GATGACAAGGAACCACCACGGATATGTAGTTGTATGGGTGATAGTAGATACGGAGGTAGAAGGAACCAAGGATGTGATCTCCAAGGACTACGTCGCATAAXXXXXXXXXXTAGGAGAAGAGTGATATGCTGATGAGACAAGGTGCCCCCAAGTGTAGGTGACATAGAAGATCAACTTACACATGACGCCTGTTTGCCAGGTTTTCATCAT
*
>Marker113962
TTTCATCTCTTGATAGGGGAGATTACAATGATGTTGGAGGATGTTTGGTAGACTCTATGATTGCCCATCAAGGGTCATATAGTGTATAACTAGAAGAGGCXXXXXXXXXXTGGTGATATTGTATACGGATATGCATTTGATCACCTACAAGGATGGGTGCAACCTTCTGCATGTGATGTTGATATAGATATGGATGTGGGAGCATATCAT
TTTCATCTCTTGATAGGGGAGATTACAATGATGTTGGAGGATGTTTGGTAGACTCTATGATTGCCCATCAAGGGTCATATAGTGTATAACTAGAAGAGGCXXXXXXXXXXTGGTGATATTGTATACGGATATGCATTTGATCACCTACAAGGATGGGTGCAACCTTGTGCATGTGATGTTGATATAGATATGGATGTGGGAGCATATCAT
*
>Marker32443
CTTTTCCTCCTACCCATTGTGTTTATTGTGAACTAGGTGTGTCCTTTTATCCCTTTCCCTCAAACAAGTGTTTAGGAGTGAAATAGTCATGCATCTAGGGXXXXXXXXXXCTAAGGAAATGGACTCTCTAGAAGGTTGTGGATTTGAGATTCTATACAAAAATTGTGACTATGCAGGTAATGGATGTGGTGTAAATCAACAAGGAATTTG
CTTTTCCTCCTACCCGTTGTGTTTATTGTGAACTAGGTGTGTCCTTTTATCCCTTTCCCTCAAACAAGTGTTTAGGAGTGAAATAGTCATGCATCTAGGGXXXXXXXXXXCTAAGGAAATGGACTCTCTAGAAGGTTGTGGATTTGAGATTCTATACAAAAATTGTGACTATGCAGGTAATGGATGTGGTGTAAATCAACAAGGAATTTG
*
>Marker200046
TTAAATTTGAATTTGTTCAATGTTTAGTAATTCAAGAATTACCAAGCCCTTAGTAAACTTGAAGTGGGTAGAATAGGGTTATTGAGTAATGAAAATAAGTXXXXXXXXXXTAACATCTCTACTTTTAGCAGGATATGAGACTACAGCTAGTTCTATGACATGGTTGCTCTATTACCTATCCAAATACCCCAAAGTCCTTGAAAAAATAAA
TTAAATTTGAATTTGTTCAATGTTCAGTAATTCAAGAATTACCAAGCCCTTAGTAAACTTGAAGTGGGTAGAATAGGGTTATTGAGTAATGAAAATAAGTXXXXXXXXXXTAACATCTCTACTTTTAGCAGGATATGAGACTACAGCTAGTTCTATGACATGGTTGCTCTATTACCTATCCAAATACCCCAAAGTCCTTGAAAAAATAAA
*
>Marker62752
CTTTAGAAGAAGTTGACTTTCCAATAGCAAACTGGTAATCAAGGTTCACTCCAAGTATGAAATGTCCCTTCATATGCGCTGGGTTTTTATGAAGATGGCCXXXXXXXXXXTTTAACAAGGTATAAAAGGAACATAAATTGAAGGAAAGAAGGGGGGCTTTTACAAGGAGTTTTTATCGGACTTACACCTGCAGATCTAAAAAGGAATCAG
CTTTAGAAGAAGTTGACTTTCCAATAGCAAACTGGTAATCAAGGTTCACTCCAAGTATGAAATGTCCCTTCATATGCGCTGGGTTTTTATGAAGATGGCCXXXXXXXXXXTTTAACAAGGTATAAAAGGAACATAAATTGGAGGAAAGAAGGGGGGCTTTTACAAGGAGTTTTTATCGGACTTACACCTGCAGATCTAAAAAGGAATCAG
*
>Marker92487
TGTTTTTGTTAAAAAAGTCAAAATCTAAAAAAACATCAAACAATCATAAAAAATTCTTTGTGTGTGATGTGTCTTTCTTGCCATAATTGAGAAACAAATCXXXXXXXXXXAATGGTTCTGCAATGCATCTGCTCCATCCTGCTATGCATCTACTCCATCTTGCTGCGCATATACACTTTGTTCCTATGCATCTGTCACAGTGAGCACTTC
TGTTTTTGTTAAAAAAGTCAAAATCTAAAAAAACATCAAACAATCATAAAAAATTCTTTGTGTGTGATGTGTCTTTCTTGCCATAATTGAGAAACAAGTCXXXXXXXXXXAATGGTTCTGCAATGCATCTGCTCCATCCTGCTATGCATCTACTCCATCTTGCTGCGCATATACACTTTGTTCCTATGCATCTGTCACAGTGAGCACTTC
*
>Marker107096
TTTTTTTTCTCAAAACATCATCCAACATGGGATTTATAACATTCTATTGCTCAAGAACCAAGATTGCTTCTAGTTTTTCTATAATTGCTACAGCCTCTGTXXXXXXXXXXACTTTCAAGACTTCTAGAAAATGTTTGACAACATTGAGAGAATTAAAACCCTTAAGTTCATATGAGGTAATGGGGATATGGTATTGTGTGTATACAGAAG
TTTGTTTTCTCAAAACATCATCCAACATGGGATTTATAACATTCTATTGCTCGAGAACCAAGATTGCTTCTAGTTTTTCTATAATTGCTACAGCCTCTGTXXXXXXXXXXACTTTCAAGACTTCTAGAAAATGTTCGACAACATTAAGAGAATTAAAACCCTTACGTTCATATGAGGTAATGGGGATATGGTATTGTGTGTATACAGAAG
* * * * *
>Marker115845
CTTTTCCATGAATTCAATACATATTTCCTTAACATACATGCATCCCTCTTATTCATCAATTTAGTCAAACCATGGTCTAAGTAATTTTTTCACCTATTGTXXXXXXXXXX-AAACCTATGTATCGTTTTCATGTTTTTCAAGTTTATTTCTATTGTCCTCAAGGTAAAAGGCACACCAATAACTATTTATACATGCACAAAACAAATAAGA
CTTTTCCATGAATTCAATACATATTTCCTTAACATACATGCATCCCTCTTATTCATCAATTTAGTCAAACCATGGTCTAAGTAATTTTTTCACCTATTGTXXXXXXXXXXGAAACCTATGTATCATTTTCATGTTTTTCAGGTTTATTTCTATTGTCCTCAAGGTAAAAGGCACACCAATAACTATTTATACATGCACAAAACAAATAAG-
* *
>Marker66305
ATTATGCGATACATGCCAAAATGTAGGCCATAGCGTGTTGATTCTTCTTATGTCAAGTTAGCAAAAGTTTATAAATAAGGTGTTGTGCTTCACATTCATAXXXXXXXXXXCTCTCAAAATTCCAAGAAAATAAAAAACCGTAGGCAAAGAATTAATTTTTGCCTTTACACCTATTCCGATGCACAACTAATACATGCAAGCGAAAACAAC
ATTATGCGATACATGCCAAAATGTAGGCCATAGTGTGTCGATTCTTCTTATATCAAGTTAGCAAAAGTTTATAAATAAGGTGTTGTGCTTCACATTCATAXXXXXXXXXXCTCTCAAAATTCCAGGAAAATAAAAAACCGTAGGCAAAGAATTAATTTTTGCCTTTACACATATTCCGATGCACAACTAATACATGCAAGCGAAAACAAC
* * * * *
>Marker110459
TTAAAACAGTATAATTCTAGGAAACAAAGTGTGGCATATCCCTTGATAGAACATAACTAAAAGGCTAGCTCGAGACTAATAGATGTTCTAAAAAATTGGA-XXXXXXXXXXGGCAATATTCAATCAGCATCAACATGAGTATGTCATAGAAAAAGGAGATGAAGAATAAGTTTTAGTTTTTTTCAAGGTTACAAGATTCCACACATGAAAG
TTAAAACAGTATAATTCTAGGAAACAAAGTGTGGCATATCCCTTGATAGAACGTAACTAAAAGGCTAGCTCGAGACTAATAGATGTTCT-AAAAATTGGACXXXXXXXXXXGGCAATATTCAATCAGCATCAACATGAGTATGTCATAGAAAAAGGAGATGAAGAATAAGTTTTAGTTTTTTTCAAGGTTACAAGATTCCACACATGAAAG
*
>Marker35109
TCTTATACAAGTTCTATCTTCTGTAAACTTCTTTCTGTAGCAAAATATCATTTAGCTATTGCTCTACTTCAAAATTTTGTCTTGACTTCAAGACCTATTCXXXXXXXXXXCGGTAAGCAAGAACAAAGCAATCAGCAAGGTCCGACAGTTAGGTCTGGATCTCTCAGAGGAAGTATCTCAGTGAAGTTTGGATTTGGGGAAGTCAAGACG
TCTTATACAAGTTCTATCTTCTGTAAACTTCTTTCTGTAGCAAAATATCATTTAGCTATTGCTCTACTTCAAAATTTTGTCTTGACTTCAAGACCTATTCXXXXXXXXXXCGGTAAGCACGAACAGAGCAGTCAGCAAGGTCCGACAGTCAGGTCCGGATCTCTCAGAGGAAGTATCTCAGTGAAGTTTGGATTTGGGGAAGTCAAGACG
* * * * *
>Marker189133
GAAAGTAAAATAACATCACAACACCAAAAAGATACTGTAGAGGATGCATAGCTCTTCAAGCAGAGGAATCAAGCCCCCAGGCTAAGAACCTACAAAAAAAXXXXXXXXXXATTCTTAATAGAATAGAAGAATATAATGAGTCAGTCAATTGCTTCAAGGAAAGAATACATACAAATAGACAAGGAAGCAATCAATATGAATGAAGAAGAG
GAAAGTAAAATAACATCACAACACCAAAAAGATACTGTAGAGGATGCATAGCTCTTCAAGCAGAGGAATCAAGCCCCCAGGCTAAGAACCTACAAAAAAAXXXXXXXXXXATTCTTAATAGAATAGAAGAATATAATGAGTCAGTCAATTGCTTCAAGGAAAGAATACATACAAATAGACAAGGAAGCAATAAATATGAACGAAGAAGAG
GAAAGTAAAATAACATCACAACACCAAAAAGATACTGTAGAGGATGCATAGCTCTTCAAGCAGAGGAATCAAGCCCCCAGGCTAAGAACCTACAAAAAAAXXXXXXXXXXATTCTTAATGGAATAGAATAATATAATGAGTCAGTCAATTGCTTCAAGGAAAGAATACATACAAATAGACAAGGAAGCAATCAATATGAATGAAGAAGAG
* * * *
>Marker211391
TTAATGTTCACCATAAGCAATGCCTATTTCATGTTGTGTGCAAGTAATGCACTACAAGTATGTGTGATATACTTTTCATGAATGATGCATGTGATGCACTXXXXXXXXXXTGAGTATGCAAATGATGCATTAGGAATAAAGAATTCTCGTGAGATAGATATACGTGGAAAATTTTCCAATTTGAACTAAAAAAATATTCTGATAAATTAT
TTAATGTTCACCATAAGCAATGCCTATTTCATGTTGTGTGCAAGTAATGCACTACAAGTATGTGTGATATACTTTTCATGAATGATGCATGTGATGCACTXXXXXXXXXXTGAGTATGCAAATGATGCATTAGGAATAAAGAATTCTCATGAGATAGATATACGTGGAAAATTTTCCAATTTGAACTAAAAAAATATTCTGATAAATTAT
*
>Marker326090
CTTGTTTTAAAGATAATACAATCTTGGCCTCTTTTCCTTGGTGATTATTTTCCTAAAATGGTTTCTCCATGTTACATACTATGTTATGTGATGTTTTCATXXXXXXXXXXTTTGAGCTACAATGGGAGTTTTATTTGATTTAATTTTACAAATTTGTGTGTAGAAGCCATGATTGCATCTACATCTCAGTTAGATATTGATAAGTTCAAT
CTCATTTTAAAGATAATACAATCTTGGCCTCTTTTCCTTGGTGATTTTTTTCCTAAAATGGTTTCTCCATGTTACATACTATGTTATGTGATGTTTTCATXXXXXXXXXXTTTGAGCTACAATGGGAGTTTTATTTGATTTAATTTTACAAATTTGTGTGTAGAAGCCATGATTGCATCTACATCTCAGTTAGATATTGATAAGTTCAAT
** *
>Marker85129
ATAAATTTTACACATGTGTTAAGTTTGGGATTTGAGCATTCTAAATCAGATTACTATGTTCATTATAAACATGATGGTGATTGTTTCTTATTTATTGTA-T-XXXXXXXXXXATTTGCATCAGTTTGTGTAGAAATTGATGAGGAGGAGAAATATCAGACCCTACTTTGTTATTTTCTTGATTCATGGGATTATCTTGTTATGGCTATTAGG
ATAAATTTT--ACATGTGTTAAGTTTGGGATTTGAGCATTCTAAATTAGATTACTATGTTCATTATAAACATGATGGTGATTGTTTCTTATTTATTGCATTAXXXXXXXXXXATTGGCATCAGTTTGTGTAGAAATTGATGAGGAGGAGAAATATCAGACCCTACTTTGTTATTTTCTTGATTCATGGGATTATCTTGTTATGGCTATTAGG
* * *
>Marker411385
TATTTTAAGGAGTTGTGTTGGGTAGTCGACATTTATTTTGACATCGTTGCAATATGGGTCATATTTGATCTTGTATTATAATGTGTCTCTAACATGAATTXXXXXXXXXXCTAGGTTCATATTGTTAGATGTGGAAAATCAATGTATGCCTTTCTCACTAATTTAACATATTCTATAAATAGGATTATTGTTTAATGAATGGACATGTAT
TATTTTAAGGAGTTGTGTTGGGTAGTCGACATTTATTTTGACATCGTTGCAATATGGGTCATATTTGATCTTGTATTATAATGTGTCTCTAACATGAATTXXXXXXXXXXCTAGGTTCATATTGTTAGATGTGGAAAATCAATGTATGCCTTTCTCGCTAATTTAACATATTCTATAAATAGGATTATTGTTTAATGAATGGACATGTAT
*
>Marker108865
AAACCTATGTTGTAGATAAAGTAACCAATACATGCCTTTTATTCATCCAAGTCACTACTCCAAAAATATTGAATACATAGGAAACAATAGATAATTCAATXXXXXXXXXXGCTTCCAACAACACTAGCATAAGGAACTTGATGCATTTCCTCAATTTCACTTCTATCTTGGGACACTATTCAACATATAGTTTTGATTAACAAGAAAAAG
AAACCTATGTTGTAGATAAAGTAACCACTACATGCCTTTTATTCATCCAAGTCACTACTCCAAAAAGATTGAATACATAGGAAACAATAGATAATTCAATXXXXXXXXXXGCTTCCAACAACACTAGCATAAGGAACTTGATGCATTTCCTTAATTTCACTTCTATCTTGGGACACTATTCAACATATAGTTTTGATTAACAAGAAAAAG
* * *
>Marker193061
TTAATTTAATGTCCAAACATTCACTAATATCCTAATGACATCACGTTATACCTATCCCAAAGTAACCTCTAGAAGGGTTACATCATCCTCACATTTAGACXXXXXXXXXXATGTCATGCCTACATATGTGCACATTCTGAAAGGTATGCACATTGTTTAAACATCCAAATATTCATTAATATACATACTTTGCAATAAATGTTGTAAAAA
TTAATTTAATGTCCAAACATTCACTAATATCCCAATGACATCACGTTATACCTATCCCAAAGTAACCTCTAGAAGGGTGACATCATCCTCACATTTAGACXXXXXXXXXXATTTCATGCCTACATATGTGCACATTTTGAAAGGTATGCACATTGTTTAAACATCCAAATATTCATTAATATACATACTTTGCAATAAATGTTGTAAAAA
* * * *
>Marker99781
TTCATTCGACATTAATGAAAGACAAATATTTCTTGGACTAGTATAAGAGTGGATGAGTTGGTCATGCTAGATAGGACTATAAGCTTTGTCTCCAAATGTGXXXXXXXXXXGTTTTTCTAAAGCACAACTATTCCATTTAATATTGGTCCTTGAATCTTTAATTGTTTTTGTTGGGAGGGAAGCTAGCAAGGTGATCCCAAGAAACTTGAT
TTCATTCGACATTAATGAAAGACAAATATTTCTTGGACTAGTATAAGAGTGGATGAGTTGGTCATGCTAGATAGGACTATAATCTTTGTCTCCAAATGTGXXXXXXXXXXGTTTTTCTAAAGCACAACTATTCCATTTAATATTGGTCCTTGAATCTTTAATTGTTTTTGTTGGGAGGGAAGCTAGCAAGGTGATCCCAAGAAACTTGAT
*
>Marker74423
TTTATATTTATAGATTTGGCATCAATCTCCTCATGGCATGAAGGGCATCTTCCTTCCATGAGATCTTCACTAAAAGGTGATATCAATTGTGTTTTAAATCXXXXXXXXXXGGGCGCCCGCTCATTAGTCCTCTAGATCCTACAATAGGAAAATCTTTAGAACAATAGGAACAGGTTGCAAACAAGATTCCTAGATCACAACAGAAACTAT
TTTATATTTATAGATTTGGCATCAATCTCCTCATGGCATGAAGGGCATCTTCCTTCCATGAGATCTTCACTAAAAGGTGATATCAATTGTGTTTTAAATCXXXXXXXXXXGGGCGCCCGCTCATTAGTCCTCTAGATCCTACAATAGGAAAATCTTTAGAACAATAGGAACAGGTTGCAAATAAGATTCCTAGATCACAACAAAAACTAT
* *
>Marker321897
CTACTTTGAGGAAAAAGTTGGGTGTCAAAAGACTAATTCGCCCCAAAACTCATAAGTTTAGAACATTTCCTATGAAACAATTTGGTGAAGGAAACAGGGAXXXXXXXXXXCAGTGGGGTAGATGATGATGTGGTTAGTTGGGTTGATAAGTATGCAGATTTTCAATTTTGATTGAATTGATGATGTGGGTAGTTGGTTTGATTAAATTAA
CTACTTTGAGGAAAAAGTTGGGTGTCAAAAGACTAATTCGCCCCAAAACTCATAAGTTTAGAACATTTCCTATGAAACAATTTGGTGAAGGAAACAGGGAXXXXXXXXXXTAGTGGGGTAGATGATGATGTGGTTAGTTGGGTTGATAAGTATGCAGATTTTCAATTTTGATTGAATTGATGATGTGGGTAGTTGGTTTGATTAAATTAA
*
>Marker18697
TCACCATAGTCTAAACTATAATGACATCGATTTCATACCTCATGCATGTGCCACAATGAGGTGTGCCAAAGCACTCGGTGAGCCCAGCAAGCCCAAAACTXXXXXXXXXXAAACAAGGTAAAATTTTAAAATTTCTATTTCATAAAATTATTCATCCATATACGTTGTCATGTCCCAAGATGGAGGATTTATTTCTACCATGCTTGCAAA
TCACCATAGTCTAAACTATAATGCCATCGATTTCATACCTCATGCATGTGCCACAATGAGGTGTGCCAAAGCACTCGGTGAGCCCAGCAAGCCTAAAACTXXXXXXXXXXAAACAAGGTAAAATTTTAAAATTTCTATTTCATAAAATTATTCATCCATATACGTTGTCATGTCCCAAGATGGAGGATTTATTTCTACCATGCTTGCAAA
* *
>Marker198765
ATGAATTACATTAGTTTAAGATTTGGAGGCTAGGCTTTTTGAAAGGTTTTTCTTAGGATAAATATCGTCATTGTGGTATTGCTTTTGTGTGTATATTTTCXXXXXXXXXXTATGGTGATGATGAATCATGCACTACTATTATAGGTAGGTGGATGGATAGGGCCCATGAAATCAATGGCTCATTTATCAAATGACTCTTGTGATAGAAAT
ATGAATTACATTAGTTTAAGATTTGGAGGCTAGGTTTTTTGAAAGGTTTTTCTTAGGATAAATATCGTCATTGTGGTATTGCTTTTGTGTGTATATTTTCXXXXXXXXXXTATGGTGATGATGAATCATGCACTACTATTATAGGTAGGTGGATGGATAGGGCCCATGAAATCAATGGCTCATTTATCAAATGACTCTTGTGATAGAAAT
*
>Marker96048
CCCTCCATGCCTCTTAAATCCCCCTTTCCATCACAAATCACATCATACTCCTGAAACATATATTACCCTTCCTCCCCCATCATCCTACAAATCCCAAAAGXXXXXXXXXXATACAAATTTGGATGCCTCTACCCATAAAGAAAAAAATTCTAAAGATACTTATGTCTTAGGGCATCAATGCAAAGAGTCTACACAAAATCTATCCAAAAG
CCCTCCATGCCTCTTAAATCCCCCTTTCCATCACAAATCACATCATACTCCTGAAACATATATTACCCTTCCTCCCCCATCATCCTACAAATCCCAAAATXXXXXXXXXXATATAGATTTGGATGCCTCTACCCATAAAGAAAAAAATCCTAAAGATACTTATGCCTTAGGGCATCAATGCAAAGAGTCTACACAAAATCTATCCAAAAG
* * * * *
>Marker22891
TATGTCTAATACTGAATTTGAATAAAATATTTTTTTTAACACAATTTTTGTAATCAAATTTCAATCACTTGAATGTTGAGATGTTCTTATCAAACTGTATXXXXXXXXXXAAGATCTAGGAGAGCCTAGAAAAAGATCTGGAAGGAGAAATAGGTTATATGATTTTGCATAAGTATGTGGGCAAAAGTTTGACAGGTTAATAAGAACTTG
CATGTCTAATACTGAATTTGAATAAAATATTTTTGTTAACACAATATTTGTAATCAAATTTCAATCACTTGAATGTTGAGATGTTCTTATCAAACTGTATXXXXXXXXXXAAGATCTAGGAGAGCCTAGAAAAAGATCTGGAAGGAGAAATAGGTTATATGATTTTGCATAAGTATGTGGGCAAAAGTTTGACAGGTTAATAAGAACTTG
CATGTCTAATACTGAATTTGAATAAAATATTTTTGTTAACACAATTTTTGTAATCAAATTTCAATCACTTGAATGTTGAGATGTTCTTATCAAACTGTATXXXXXXXXXXAAGATCTAGGAGAGCCTAGAAAAAGATCTGGAAGGAGAAATAGGTTATATGATTTTGCATAAGTATGTGGGCAAAAGTTTGACAGGTTAATAAGAACTTG
* * *
>Marker23115
CTATCTTCTAAAGTTCATGCAAAAGTGAAAGTTGTGAGAAGAACAATGTGCTAACATGAGGATTCTTGTTTTATTGGAAGGAGTTGTGTTTGATGTTTAGXXXXXXXXXXAAAAGATTCTAGAGCTATTAGAGTGAAGACAGAGGTTTAGGATGGTTGCAGTTAGGATATGTCTAAGAACTGCTCCGCATTTCTCCGCCTTTGAAGATGA
CTATCTTCTAAAGTTCATGCAGAAGTGAAAGTTGTGAGAAGAACAATGTGCTAACATGAGGATTCTTGTTTTATTGGAAGGAGTTGTGTTTGATGTTTAGXXXXXXXXXXAAAAGATTCTAGAGCTATTAGAGTGAAGACAGAGGTTTAGGATGGTTGCAGTCAGGATATGTCTAAGAACTGCTCCGCATTTCTCCGCCTTTGAAGATGA
* *
>Marker54579
GCCTCCATGATGCTTCTCATTTAGAATTTACTTGTTCACTCTATTAGAAGGCTATCAAACAAGTGTAAAGGCATTTGAAGATTTCCATAAGCCCAAAGGAXXXXXXXXXXGAAGCTTTGGTGCATGGATTGTTGGTGGCCCTCTAGAAAAAGGTTAGAGTTATTAAAGTATTTGGTGATTTAGAATTAGTCATCAAACAAGTGAGAAAGT
ACCTCCATGATGCTTCTCATTTAGAATTTACTTGTTCACTCTGTTAGAAGGCTATCAAACAAGTGCAAAGGCATTTGAAGATTTCCATAAGCCCAAAGGAXXXXXXXXXXGAAGCTTTGGTGCATGGATTGTTGGTGGCCCTCTAGAAAAAGGTTAGAGTTATTAAAGTATTTGGCGATTTAGAATTAGTCATCAAACAAGTGAGAAAGT
* * * *
>Marker210840
AAATCACAAACCCTCTTGAATGAAGATAGCTATGGGCTTTATACACTTAAATCTAGAACCACAATGGTAAATTCCATTCCGCAAAGAAGTGTGGAGCACAXXXXXXXXXXTGTTGACATCAATAACAACACTCACTGCTCATACTTGCAATAAAGTGGTGTGGGATATAATCCCAAAATTTAAACTTTGGCTATATGGAGCATGCAAAAG
AAATCACAAACCCTCTTGAATGAAGATAGCTATGGGCTTTATACACTTAAATCTAGAACCACAATGGTAAATTCCATTCTGCAAAGAAGTGTGGAGCACAXXXXXXXXXXTGTTGACATCAATAACAACACTCACTGCTCATACTTGCAATAAAGTGGTGTGGGATATAATCCCAAAATTTAAACTTTGGCTATATGGAGCATGCAAAAG
*
>Marker165420
TATTATGATCATTCATATACTCCTTATGGAAGCCTGGATCTACTTTTTGTAGTCATGGGGCCAAAATTATGTTGTCTTTATGTCTGCCTTATTAACCATTXXXXXXXXXXATCAAACAAACTACCTTTTAATATCTTAAAAAAAGACTCCAAAATTGCTTAGCAAACACACAGTCAAAGAAAATATGTTCACAATCTTTAGGCAGATTAC
TGTTATGCTCATTCATATACTCCTTATGGAAGCCTGGATCTACTTTTTGTAGTCATGGGGCCAAAATTATGTTGTCTTTATGTCTGCCTTATTAACCATTXXXXXXXXXXATCAGACAAACTACCTTTTAATATCTTAAAAAAAGACTCCAAAATTGCTTAGCAAACACACAGTCAAAGAAAATATGTTCACAATCTTTAGGCAGATTAC
* * *
>Marker57697
CAAGAACACATCGAATAGCGAATTCCACGCTATTGCACTCCACTTCAAATATCTGCCTAAGAAAGACAGTGTTTAGTGCCCCGTGGTAGATCGGTTCGTCXXXXXXXXXXAAGGGTCTAATACTCAATTAATACATATGTGCCAAAAAGCCAAAGCCAATACTCCAGATTGCTTGGCCAGAAAGGGAAGATGATGTAGTCAATACTAAAG
CAAGAACACATCGAATAGCGAATTCCACGCTATTGCACTCCACTTCAAATATCTGCCTAAGAAAGACAGTGTTTAGTGCCCCGTGGTAGATCGGTTCGTCXXXXXXXXXXAAGGGTCTAATACTCAATTAATACATATGTGCCAAAAAGCCAAAGCCAATACTCCAGATTGCTTGGTCAGAAAGGGAAGATGATGTAGTCAATACTAAAG
*
>Marker33892
CTCAGGGGTGGCAGTGTTGGATAAGATATTTGCTCCTGGTCATCTAGTGTATACCCAGGATCGATGGCAGATGAGTTACGCGCAGACTCTATTAGCTGGGXXXXXXXXXXGTGATTAGATGGCATGTGTCAACTTATCATCGGGCTTGGTTTGAGGCATACGTGTTCTTGTATAGGCCACCTATTACACATACCCACACAGGGTAGTTAC
CTCAGGGGTGGCAGTGTTGGATAAGATATTTGCTCCTGGTCATCTAGTGTATACCCAGGATCGATGGCAAATGAGTTACGCGCAGACTCTATTAGCTGGGXXXXXXXXXXGTGATTAGATGGCATGTGTCAACTTATCATCGGGCTTGGTTTGAGGCATACGTGTTCTTGTATAGGCCACCTATTACACATACCCACACAGGGTAGTTAC
*
>Marker109907
CTCAATGTCATCCCTGATAGCAAAGTATACAAAAAGCATTGTATTGTAAGCTACAGGTCTACAGATTTGAAGATTTGTTCTAAGACCATGATGATTCAATXXXXXXXXXXAAGTTAGAGAACAGTCATACAAATTGCATACACAATCATGAAGGGTAGAGTATCATGAAAAAACACAAATGATAGATCCATGAACCTTAAAAAAATTTCT
CTCAATGTCATCCCTGATAGCAAAGTATACAAAAAGCATTGTATTGTAAGCTACAGGTCTACAGATTTGAAGATTTGTTCTAAGACCATGATGATTCAATXXXXXXXXXXAAGTTAGAGAACAGTGATACAAATTGCATACACAATCATGAAGGGTAGAGTATCATGAAGAAACACAAATGATAGATCCATGAACCTTAAAAAAATTTCT
* *
>Marker119562
CTCGCCTTCTATCATCATGGCGGTGAAACTCTGTTGCAGGTCCGCACTCTCCACCACTCTCAGTGTGCAACCCTCATCCTGACCCTCAGCCAAAGTCTCCXXXXXXXXXXTGATGTCACTGATCCTGCTGCTGTGGTTGGCACCCATGTGGTGTCTGATACCGACAGAGTCGACATTTTGACTAGCACTGACTGTGATGACTAGGACCGA
CTCGCCTTCTATCATCATGGCGGTGAAACTCTGTTGCAGGTCCGCACTCTCCACCACTCTCAGTGTGCAACCCTCATCCTGACCCTCAGCCAAAGTCTCCXXXXXXXXXXTGATGTCACTGATCCTGCTGCTGTGGTTGGCACCCATGTGGTGTTTGATACCGACAGAGTCGACATTTTGACTAGCACTGACTGTGATGACTAGGACCGA
*
>Marker395412
ATGATATCAGATTATTGAGCCTGTCATTTCAAATAATTGAATGATACCAAATTCTGCAAGTCATGTATTGGACATCATGATATCAGGCATGTAAATGCTTXXXXXXXXXXGCAGAGGATCCTGGAATGCATAAAAAAATTAAAATGCAACAGATAAGGAACAAACTTCATCTACTACAAGTAGGCATAACCAGGAAGGATGGAGAGGGAA
ATGATATCAGATTATTGAGCCTGTCATTTCAAATAATTGAATGATACCAAATTCTGCAAGTCATGTATTGGACATCATGATATCAGGCATGTAAATGCTTXXXXXXXXXXGCAGAGGATCCTGGAATGCATAAAAAAATTAAAATGCAACAGATAAGGAACAAACTTTATCTACTACAAGTAGGCATAACCAGGAAGGATGGAGAGGGAA
*
>Marker288288
TAAAGTTTGTGAGCTTTCATGTTTGCCTTGTAGCCTTTATTTGCATGCATCTCCTTTCTAGATTCTTATTCATGCACTTCACCTAAGTTCACTTGCATTCXXXXXXXXXXATTTGACAGTCTTTGCCATCTATAAAAAAGTGTGGGCTTCAACTACTGAATCCTGGCATTTCATTTGATACCCTAGGCAATGAATGGTTTGGAACGTGCA
TAAAGTTTGTGAGCTTTCATGTTTGCCTTGTAGCCTTTATTTGCATGCATCTCCTTTCTAGATTCTTATTCATGCACTTCACCTAAGTTCACTTGCATTCXXXXXXXXXXATTTGACAGTCTTTGCCATCTATAAAAAAGTGTGGGCTTCAACTACTGAATCCTGGCATTTCATTTGATACCCTAGGCAATGAATGGTTTGGAACATGCA
*
>Marker191868
TTAGTCTCAATATCCCTTACTTTCTGCATGCTAGCTTTCAATACATCAAATTCAAATTGTAATTCCATGACCCATGTGTCTAACAAAGGAAGAGTCATATXXXXXXXXXXGGTATTTCTTCCTCACTAATTAATGTTAGAGTAGTGGGCTTTTCTGTAGCCTATAGGGTTGATGCTAGGCTATCTATATTCACTAATACCTATCTAAACT
TTAGTCTCAATATCCCTTACTTTCTGCATGCTAGCTTTCAATACATCAAATTCAAATTGTAATTCCATGACCCATGTGTCTAACAAAGGAAGAGTCATATXXXXXXXXXXGGTATTTCTTCCTCACTAATTAATGTTAGAGTAGTGGGCTTTTCTGTAGTCTATAGGGTTGATGCTAGGCTATCTATATTCACTAATACCTATCTAAACT
*
>Marker105091
TGGTTTGCATTCTCACACTTGGTGAAGGTGTTTAGAGTGATTTTCTGTGGCCTTTGTTGTTGGTCCAGCTACAACATCCAAACGAAGTTGTAAATCTTGAXXXXXXXXXXTTACAGTGGTATCAGAGCAGAAGATCTTGTCATCCTGTGATATAGATACAGACATGCAGTGAGATTTGAGTTATGTTACCTATGCAGCCATTGACACACC
TGGTTTGCATTCTCACACTTGGTGAAGGTGTTTAGAGTGATTTTCTGTGGCCTTTGTTGTTGGTCCAGCTACAACATCCAAACGAAGTTGTAAATCTTGAXXXXXXXXXXTTACAGTGGTATCAGAGCAGAAGATCTTGTCATCCTGTGATATAGATACAAACATGCAGTGAGATTTGAGTTATGTTACCTATGCAGCCATTGACACACC
*
>Marker261257
GTCGACCATAAAATACTAAAGACTAACACAAAGTCATAATCCGACTAGAGATTTTTAAAGTTATCTAAACCCTTATGGGTAGATGCTATGGTTTGACTTCXXXXXXXXXXATAGCAATCCAATATCTTCGATCTCTTGGTCTTCGCAAGTCTATCGACCATTTGATACTGAAAAGATTATGAACTCTTGTATTTCATCCTAGAATATAAT
GTCGACCATAAAATACTAAAGACTAACACAAAGTCATAATCCGACTAGAGATTTTTAAAGTTATCTAAACCCTTATGGGTAGATGCTATGGTTTGACTTCXXXXXXXXXXATAGCAATCCAATATCTTCGATCCCTTGGTCTTCGCAAGTCTATCGACCATTTGATACTGAAAAGATTATGAACTCTTGTATTTCATCCTAGAATATAAT
*
>Marker180835
TATTGTCTTGAGCAGCTCTCATGGGATGCATGGCTAAATGGGTAATGATTCTCAACAAATTTGACATTGAATATATAGAAAGAAAGGCCATCAAAGGACAXXXXXXXXXXTGAAGCACTTACAAGACTCTATATGGCAATCCAGTGGAAAATAGAGAACCTAATGGTTTATGGTGACTCTTGAAATTGGTCATAAAACAAGTGAACAATG
TATTGTCTTGAGCAGCTCTCATGGGATGCATGGCTAAAAGGGTAATGATTCTCAACAAATTTGACATTGAATATACAGAAAGAAAGGCCATCAAAGGACAXXXXXXXXXXTGAAGCGCTTGCATGACTCTATATGGCAATCCAGTGGAAAATAGAGAACCTAATGGTTTATGGTGACTCTTGAAATTGGTCATAAAACAAGTGAACAATG
* * * * *
>Marker369634
CATCCAAACATGTAGATGAAATCTTCTAGAATGAATGTGGTAATGATGGATTAATGAATCTCAGTGTGGTTCATACCATAAGCTCTCCTAGGTCTAATGTXXXXXXXXXXACAAAGTGAAAGAAAATATTTTTGGGTAATGTAGGATTGCTCTTACACCTTGGGATGTTCTTGCATCAGAAAGGGAGTTGAATTTAGTTATTGGGATGTT
CATCCAAACGTGTAGATGAAATCTTCTAGAATGAATGTGGTAATGATGGATTAATGAATCTCAGTGTGGTTCATACCATAAGCTCTCCTAGGTCTAATGTXXXXXXXXXXACAAAGTGAAAGAAAATATTTTTGGGTAATGTAGGATTGCTCTTACACCTTGGGATGTTCTTGCATCAGAAAGGGAGTTGAATTTAGTTATTGGGATGTT
*
>Marker347270
CTTATTTTGGTAGTCGGACAAATTTGACAGTCACTATATTTATCTTGCACTCCCTCTAAAACTGACAAACTTCTAGTTTATCTGGAGGGTTTTATATTTGXXXXXXXXXXTAGATTCTCACAGGTGACACTACATGGTTCTCATTTTGGGAACTTCAAAGTTGCATAAATTTTGCATACGACCTCGGATCAAGGTGATTCTTGTTTTGAA
CTTATTTTGGTAGTCGGACAAATTTGACAGTCACTATATTTATCTTGCACTCCCTCTAAAACTGACAAACTTCTAGTTTATCTGGAGGGTTTTATATCTGXXXXXXXXXXTAGATTCTCACAGGTGACACTACATGGTTCTCATTTTGGGAACTTCAAAGCTGCATAAATTTTGCATACGACCTCGGATCAAGGTGATTCTTGTTTTGAA
* *
>Marker81278
ATAGATAGCAATCTTTACATCAAGGAAGAAGGAGATATGATATTGATAGTTGTAGTTTATGTTGATGACATAATCTTTAGTGGAGATGATAACATGTGTAXXXXXXXXXXTTGGAGTATTGTTGTATTTGATTGCATCTAGACCTGACATCATGCATGTGGTATGTGTGGTTTCTAGATATCAAGCCAATCCTAAGCAAACACATGAGAA
ATAGATAGCAATCTTTACATCAAGGAAGAAAGAGATATGATATTGATAGTTGTAGTTTATGTTGATGACATAATCTTTAGTGGAGATGATGACATGTGTAXXXXXXXXXXTTGGAGTATTGTTGTATTTGATTGCATCTAGACCTGGCATCATGCATGTGGTATGTGTGGTTTCTAGATATCAAGCCAATCCTAAGCAAACACATGAGAA
* * *
>Marker69547
TATCCCAATTACCAAACATGAAATAAGGTGTTTATCAAACAATGTCCACATGACAAATAAGACAAAAGCATTAAGTAAGGCTATGCATGTTTGACACCAAXXXXXXXXXXCATCACCAACAACATAAAATACCTCATATCATCATTAAAATTTTATTCCAATGGTCTCAAGACCTACTTTACAAATATTTACAATGTATCAAAATGAAAT
TATCCCAATTACCAAACATGAAATAAGGTGTTTATCAAACAATGTCCACATGACAAATAAGACAAAAGCATTAAGTAAGGCTATGCATGTTTGACACCAAXXXXXXXXXXCATCACCGACAACATAAAATACCTCATATCATCATTAAAATTTTATTCCAATGGTCTCAAGACCTACTTTACAAATATTTACAATGTATCAAAATGAAAT
*
>Marker160016
CTCATTCTATAGGAGATGTGTAAATAACTTGCCCAGACATCCACATGATTCTCCAATTTGCAGAAATCCTCTGTATTATATTCAAAACACAATCGTTGTAXXXXXXXXXXATATAACTCCTTTTTCAAATTTTCGTTTCCTTTTTTCTACAAGGACATAAGATAAAATATTTAAGCTAAGAGTTAGATCCAGAGCCACTGTTTAAGAACC
CTCATTCTATAGGAGATGTGTAAATAACTTGCCCAGACATCCACATGATTCTCCAATTTGCAGAAATCCTCTGTATTATATTCAAAATACAATCGTTGTAXXXXXXXXXXATATAACTCCTTTTTCAAATTTTCGTTTCCTTTTTTCTACAAGGACATAAGATAAAATATTTAAGCTAAGAGTTAGATCCAGAGCCACTGTTTAAGAAAC
* *
>Marker397684
ATTTTGCCTGCTTTTTGGTTTTCTCCTTTTGAGGTTCTCAACTAGTTGCTTCTGATATTCTTCTTTGGCTTCTAAAGCTACATGAGTTATTTCAGTCTTTXXXXXXXXXXATAGCTTAGTTTTCAGACATTTCTTGACCTATGACTATACGAGTTTGGCAAGGAGCTCCTTTACATTGGCTGTAAGCACCTACAGTAATTGAGCTACAAA
ATTTTGTCTGCTTTTTGGTTTTCTCCTTTTGAGGTTCTCAACTAGTTGCTTCTGATATTCTTCTTTGGCTTCTAAAGCTACATGAGTTATTTCAGTCTTTXXXXXXXXXXATAGCTTAGTTTTCAGACATTTCTTGACCTATGACTATACAAGTTTGGCAAGGAGCTCCTTTACATTGGCTGTAAGCACCTACAGTAATTGAGCTACAAA
* *
>Marker246194
ACATGTTGAGGGAAAAGCATGGACAAAATATTTTGGGAACTCTCTCCCAATGGAGTTGATTCTTACAAATATGAGCTCTATTCCATTATCAAAGATCTTCXXXXXXXXXXATACCTTTGAATGAAAGTGGGGGGTTTGAATGAAGGCCTTTTTTTTCTATTTTTAGATGTTGCACATTCAAAAGCTCTATGGAAAAGACCTTTAAATGAA
ACATGTTGAGGGAAAAGCATGGACAAAATATTTTGGGAACTCTCTCCCAATGGAGTTGATTCTTACAAATATGAGCCCTATTCCATTATCAAAGATCTTCXXXXXXXXXXATACCTTTGAATGAAAGTGGGGGGTTTGAATGAAGGCCTTTTTTTTCTATTTTTAGATGTTGCACATTCAAAAGCTCTATGGAAAAGACCTTTAAATGAA
*
>Marker258825
CAAAATGTATAGCTTAAACAAACTACTAACACATAACCAACTAAACTATTTTAAAACATGGTTCAACAACAAAGATGTATGATGAATTTCTAAGGGGTATXXXXXXXXXXTCAAGAAGTGGCAATATTGGATTAAAATTCACATTTCTTGACCTTGTCCAATGCAAGCAAGGGTAGGTTGACTGGGTCAATGATTTTCTTTAACATTTTC
CAAAATGTATAGCTTAAACAAACTACTAACACATAACCAACTAAACTATTTTAAAACATGGTTCAACAACAAAGATGTATGATGAATTTCTAAGGGGTATXXXXXXXXXXTCAAGAAGTGGCAATATTGGATTAAAATTCACAGTTTTTGACCTTGTCCAATGCAAGCAAGGGTAGGTTGAGTGGGTCAATGATTTTCTTTAACATTTTC
* * *
>Marker198808
TTTAAAACTAGATTTTAAAATTTGTTAATCATGTTCTTGTCACATCTTGAAATTTTGAGCATGGAGATCTTGAA--TCTCATCCAAGATCATTTATTCTTGAXXXXXXXXXXATGTGAGAAGATATTAAGTGTGCAAATCTTGTATAGAATGAGAATGCCTAGTAAATTATAAGAAACAACTAAGCATAGAGCTCTTATTTATACAAAATAA
TTTAAAACTAGATTTTAAAATTTGTTAATCATGTTCTTGTCACATCTTGAAATTTTGAGCATGGAGATCTTGAATTTCTCATCCAAGATCATTTATTCTT--XXXXXXXXXXATGTGAGAAGATATTAAGTGTGCAAAGCTTGTATAGAATGAGAATGCCTAGTAAATTATAAGAAACAACTAAGCATAGAGCTCTTATTTATACAAAATAA
*
>Marker116991
AGAGTATTGTTGAGTGTTTCATATCGACTAAGCTATGTTTCTTCTTCTTGTTGGTTGCAGTTTGGTAGTGCACTATCTTTTATGTCAAAGTATTCCCCTAXXXXXXXXXXGCATAGGTGGCATTTCTTCTAGTGGTTTTAGTGCTATTTAGGCAAAGGTGTTGGGCCATCATTGGTCTAGGCTGATGTGGTGGGCTCACATTGTTTTGTT
AGAGTATTGTTGAGTGTTTCATATCGACTGAGCTATGTTTCTTCTTCTTGTTGGTTGCAGTTTGGTAGTGCACTATCTTTTATGTCAAAGTATTCCCCTAXXXXXXXXXXGCATAGGTGGCATTTCTTCTAGTGGTTTTAGTGCTATTTAGGCAAAGGTGTTGGGCCATCATTGGTCTAGGCTGATGTGGTGGGCTCACATTGTTTTGTT
*
>Marker139097
TGAGATTTCAAAGAGGCAGTGGTGTGCTCATGTGATAGTTTAGGGTTATGCTAGATGTCCAAGATAATTCAGTTCTTCATTAAGGGGAGTGTTAGAGTAAXXXXXXXXXXTGTTATTTTCTTAGTTTTCATCAAGGATGCCAGGTGAAGAGTTACGTAAAGAAATAATATTGATTAGATCTAGCTACATTCATAAGCTGCAAGAGAAACT
TGAGATTTCAAAGAGGCAGTGGTGTGCTCATGTGATAGTTTAGGGTTATGCTAGATGTCCAAGATAATTCAGTTCTTCATTAAGGGGAGTGTTAGAGTAAXXXXXXXXXXTGTTATTTTCTTAGTTTTCATCAAGGATGCCAGGTGAAGAGTTACGTAGAGAAATAATATTGATTAGATCTAGCTACATTCATAAGCTGCAAGAGAAACT
TGAGATTTCAAAGAGGTAGTGGTGTGCTCATGTGATAGTTTAGGGTTATGCTAGATGTCCAAGATAATTCAGTTCTTCATTAAGGGGAGTGTTAGAGTAAXXXXXXXXXXTGTTATTTTCTTAGTTTTCATCAAGGATGCCAGGTGAAGAGTTACGTAGAGAAATAATATTGATTAGATCTAGCTACATTCATAAGCTGCAAGAGAAACT
* *
>Marker156340
TAAAATTTCACAGTTCTATTTATAGTTGCTGATTTCTAGTATTCAATCAATTTTTCTTTCATTTTCCAAGAAATTAGCTTCTTTTCACATATCTTAGCAC--XXXXXXXXXXTGAGGCCAAAACTTTGTGTATGAGCTTCACAACCCAATCATCCAATTCACTATATATCATTTGTAGAAGTTTATGACATGCCACTATAATGACTCAATCT
TCAAATTTCACAGTTCTATTTATAGTTGCTGATTTCTAGTATTCAATCAATTTTTC--TCATTTTCCAAGAAATTAACTTCTTTTCACATATCTTAGCACAAXXXXXXXXXXTGAGGCCAAAACTTTGTGTATGAGCTTCACAACCCAATCATCCAATTTACTATATATCATTTGTAGAAGTTTATGACATGCCACTATAATGACTCAATCT
* * *
>Marker432238
TATGTTAAATTATGAGCATTATGGAATGTGATGTTACACTTTCTAAATCTACTCATCTATCATAACATGTTTTTGGTAGTATACTTGAGTGTCTAAGTAAXXXXXXXXXXGCCTTGTTGGGATTGTGTAACCTGTTATGTTAAATGTTGTGTGTTTCAATTGTAATTCATTATTACAAAGCATTGATGTTTTATGGAATCCCTCAACATT
TATGTTAAATTATGAGCATTATGGAATGTGATGTTACACTTTCTAAATCTACTCATCTATCATAACATGTTTTTGGTAGTATACTTGAGTGTCTAAGTAAXXXXXXXXXXGCCTTGTTGGGATTGTGTAGCCTGTTATGTTAAATGTTGTGTGTTTCAATTGTAATTCATTATTACAAAGCATTGATGTTTTATGGAATCCCTCAACATT
*
>Marker225986
GGAAGCATATCTTCAAATAGCCTAAGTCTGGTAGAGCATAACACAGTGATATTCAGAGCAGAACACTCAGTTGAATTGGCCCTCATTCCTTCGGTGTTGCXXXXXXXXXXTCTAATATGAGTTTGAGCAAGTCTTGTGGTCCACAGTAAAAGATGTGGGCTGACAGATGAAGTGAACCAATGGCTATCCGTGTTTAAGGCCAACATGATA
GGAAGCATATCTTCAAATAGCCTAAGTCTGGTAGAGCATAACACAGTGATATTCAGAGCAGAACACTCAGTTGAATTGGCCCTCATTCCTTCGGTGTTGCXXXXXXXXXXTCTAATATGAGTTTGAGCAAGTCTTGTGGTCCACAGTAAAAGATGTGGGCTGACAGATGAAGTGAACCAATGGCTATCTGTGTTTAAGGCCAACATGATA
*
>Marker364618
TTGAGTGCATGATGAAGAGGCTTAATTGTGGTAATTGTGAAATAAGTATTCAAGAGAATGTGAACACTCCACTTTGTCTTTTCTCAAAAGAAGAATATTCXXXXXXXXXXCTTCCAAAATCCAAGTTTTTCTAAAGGTAATCCTTGTGTCTTCCATTATTTTATTGCTAGCTCATGTTCCTTCATATTAATTGTTTATTTGACTGTTTAA
TTGAGTGCATGATGAAGAGGCTTAATTGTGGTAATTGTGAAATAAGTATTCAAGAGAATGTGAACACTCCACTTTGTCTTTTCTCAAAAGAAGAATATTCXXXXXXXXXXCTTCCAAAATCCAAGTTTTTCTAAAGGTAATCCTTGTGTCTTCCATTATTTTATTGCTAGCTCATGTTCCTTCATATTAATTGTTTATTTGAATGTTTAA
*
>Marker23976
AACAAGAACTTGTTGAACATCATAAAGAAATTGATAGAAAAGAACCCAAGGGAGTGGAACACCCTATTAAAATACACATTGTGGGTCGATAGAACTTGGAXXXXXXXXXXAGTCCTTATGTGGGATAAAGCACATGAAAGGAAAGGGGATCATGGTAAATTTGATAAACTTTGGACAGGTCCTTTTCAAGTTTTAGAAATCTTAGGAGAC
AACAAGAACTTGTTGAACATCATAAAGAAATTGATAGAAAAGAACCCAAGGGAGTGGAACACCCTATTAAAATACACATTGTGGGTCGATAGAACTAGGAXXXXXXXXXXAGTCCTTATGTGGGATAAAGCACATGAAAGGAAAGGGGATCATGGTAAATTTGATAAACTTTGGACAGGTCCTTTTCAAGTTTTAGAAATCTTAGGAGAC
*
>Marker532623
TCATTTTACAATTCTTCTTCAGAAAACAGCTGCATACCTATTTTTCTTTGCCAGATTTTGACTTTATCTGACATTTCTTTGAAAAGGGATCTATAAACATXXXXXXXXXXATGCAAAAGTGGTTATAAAGGATCAACATTACAAGAAATGTCCGCAAAAGCAAACTAGTTATGCAGTTGTTTCCTGGAAAAGAATTATAGAGTTTATTGA
TCATTTTACAATTCTTCTTCAGAAAACAGCTGCATACCTATTTTTCTTTGCCAGATTTTGACTTTATCTGACATTTCTTTGAAAAGGGATCTATAAACATXXXXXXXXXXATGCAAAAGTGGTTATAAAGGATCAACATTACAAGAAATGTCCGCAAAAGCAAACTAGTTATGCAGTTGTTTCCTGGAAAAGAATTATAGAATTTATTGA
*
>Marker146428
ATTGATTTCTTGAAGACACTTGCTCCACAAGATGTCCAATCTTAATCGTGTCTTGGATTCCTCTTCCAACCTCAATTGTTCCTTGACTTGACGAATAGCTXXXXXXXXXXTTAGGCAATATAGCTCCTCGTGTCCATTGGTGTTGTGGATTCTACATCCCTTCCTTGATGCAAAGTCATCCAAACTCTTAGGATGAAGTTGTGTGTTCAA
ATTGATTTCTTGAAGACACTTGCTCCACAAGATGTCCAATCTTAATCGTGTCTTGGATTCCTCTTCCAACCTCAATTGTTCCTTGCCTTGACGAATAGCTXXXXXXXXXXTTAGGCAATATAGCTCCTCGTGTCCATTGGTGTTGTGGATTCTACATCCCTTCCTTGATGCAAAGTCATCCAAACTCTTAGGATGAAGTTGTGTGTTCAA
*
>Marker156217
TGGATATTGCTATTCTTCATTGTTTTGTGGCATTTACCTTCCCTAATCTTAGCATTTGGAGGCATTATTGTTGCTTCTCCTAATTGTAATACATTATCCTXXXXXXXXXXGCAAAAACCCCCAAAAAATACATAGAGCAAACATATATAGAGGGGTGTATGTTACATCATCTGAAAGAATAGCTTCCCCGTAGGATCTAGGCTCATCATT
TGGATATTGCTATTCTTCATTGTTTTGTGGCATTTACCTTCCCTAATCTTAGCATTTGGAGGCATTATTGTTGCTTCTCCTAATTGTAATACATTATCCTXXXXXXXXXXGCAAAAACCCCCAAAAAATACATAGAGCAAACATATATAGAGGGGTGTATGTCACATCATCTGAAAGAATAGCTTCCCCATAGGATCTAGGCTCATCATT
* *
>Marker296228
GTATCCATCCTCACCCAGCACTGGCATGGTTATCAAGCTAGCCACTCTAAGCACCCCTTCTCTGTGCACCACCCTAAGGTTGCTCCCACAACCTACCAGAXXXXXXXXXXCCTTCAATTGACATGTTCTCTTAATGCCTGTGTTTGTGGTTCCACACATGCCCAAGGCATTGCGCATCATAGCCAAGGTATTACAATTATCTATGCAGAA
GTATCCATCCTCACCCAGCACTGGCATGGTTATCAAGCTAGCCACTCTAAGCACCCCTTCTCTATGCACCACCCTAAGGTCACTCCCACAACCTACCAGAXXXXXXXXXXCCTTCAATTGACATGTTCTCTTAATGCTTGTGTTTGTGGTTCCACACATGCCCAAGGCATTGTGCATCATAGCCAAGGTATTACAATTATCTATGCAGAA
* ** * *
>Marker122452
GATGATACTAATCCCTTCTCATGTTCATGTATTTCATCATCAAGTATTTCACATCACAACTCCTCTGATCACCACTCCTTTGACATCAATGACAACATATXXXXXXXXXXCCTGGTTAGATGCAACATCTGTCCATGTAATTATGAGAAGGAGAGGGAGGGAAATCCAATCCCTAACTTCTACCTGAGATATTCAAATGTGTCCTTAGAG
GATGATACTAATCCCTTCTCATGTTCATGTATTTCATCATCAAGTATTTCACATCACAACTCCTCTGATCACCACTCCTTTGACATCAATGACAACATATXXXXXXXXXXCCTGGTTAGATGCAACATCTATCCATGTAATTATGAGAAGGAGAGGGAGGGAAATCCAATCCCTAACTTCTACCTGAGATATTCAAATGTGTCCTTAGAG
*
>Marker67548
GTGATTGAGAGCGATGTAGGGAAGATTTGATTCATTACCTTGTGAAAGCATATAGATTGTTGTGTAATGGAG-TTTTTGTTTGGTGTAAAGGATAAAACTTXXXXXXXXXXTAGTAGTTGCAATCTTTGAATTGTGTATAAGTTTGTGAAATTGTGATAGCATAGAGTCTCTGTTGCATTTTGAATTTTGTGTGTTGTATTGGCAAGAGGG
GTGATTGAGAGCGATGTAGGGAAGATTTGATTCATTACCTTGTGAAAGCATATAGATTGTTGTGTAATGGAGTTTTTTGTTTGGTGTAAAGGATAAAAC-TXXXXXXXXXXTAGTAGTTGCAATCTTTGAATTGTGTATAAGTTTGTGAAATTGTGATAGCATAGAGTCTCTGTTGCATTTTGAATTTTGTGTGTTGTATTGGCAAGAGGG
>Marker414582
TTTGATATCGTTCTAAATAGATAGAATTATAAATTTCCATATTTCTTTTAAGATCTTTCTCCCCATTTGTGGGTTCCTAAAGAGTTGAGTTGTCTTTATTXXXXXXXXXXAGTAAGCTTTTGAGAAAACACATAGATATATGATGCATACACAATACGTAAGACATGAAGTATACCCCTAAATACATGTGAGGCCTAAATCATACACATA
TTTGATATCGTTCTAAATAGATAGAATTATAAATTTCCATATTTCTTTTAAGATCTTTCTCCCCATTTGTGGGTTCCTAAAGAGTTGAGTTGTCTTTATTXXXXXXXXXXAGTAAGCTTTTGAGAAAACACATAGATATATGATGCATACACAATACATAAGACATGAAGTATACCCCTAAATACATGTGAGGCCTAAATCATACACATA
*
>Marker169873
TAAATCAAGTATCCCTAAGTCTGCTTATGCTACAAGACTTAATATCTTTTGACGAGGGAGATACCAGCCTAGAGCAAGCATCTTATGAACATCCTCCATCXXXXXXXXXXTCCATCCCTTATATTGTCCATTCACGCATACCCTAATGCAGGATGTGATCCATTGGCTACTAGCTAGGAACAATTTATCCTCATGTC-AAACACCTATCTT
TAAATCAAGTATCCCTAAGTCTGCTTATGCTACAAGACTTAATATATTTTGACGAGGGAGATACCAGCCTAGAGAAAGCATCTTATGAACATCCTCCATCXXXXXXXXXX-CCATCCCTTATATTGTCCATTCACGCATACCCTAATGCAAGATGTGATCCATTGGCTACTAGCTAGGAACAATTTATCCTCATGTCAAAAAACCTATCTT
* * * *
>Marker108258
CTACTTTTTATATTATTGCTATTTATTTTGAAATGTAAATGCACCACTTACCATTTGCATTATGAAATGTTGCTTTTATTATTGTTTTTGTTGTTATCTAXXXXXXXXXXTATGAACTTTTTCCATGTCAATTAATGTGGCCATGCCAATGGAATGTTTAATTGCTAGAAACTAGAGCTCTAGAAGGTTGACCTGGTTGAAATCAACCCT
CTACTTTTTATATTATTGCTATTTATTTTGAAATGTAAATGCACCACTTACCATTTGCATTATGAAATGTTGCTTTTATTATTGTTTTTGTTGTTATCTAXXXXXXXXXXTATGAACTTTTTCCATGTCAATTAATGTGGCCATGCCAATGGAATGTTTAATTGCTAGAAACCAGAGCTCTAGAAGGTTGACCTGGTTGAAATCAACCCT
*
>Marker207427
TATTCAATCAATCAAATTGTATTTGCTTCCTCATGTTTGGGGAACTCACAAATTGGCCAAATGACTGATATAATTTGATAGAACATGTCATGCATCTACTXXXXXXXXXXCTCCTTAGCCTAAGTAATTATATATTATATTTTACACATGGCTTTAACACACCTTAGGTAGGTTATGTGACAACTTGGAGAATTGGTCAAACTCATCCAA
TATTCAATCAACCAAATTGTATTTGCTTCCTCATGTTTGGGGAACTCACAAATTGGCCAAATGACTGATATAATTTGATAGAACATGTCATGCGTCTACTXXXXXXXXXXCTCCTTAGCCTAAGTAATTATATATTATATTTTACACATGGCTTTAACACACCTTAGGTAGGTTATGTGACAACTTAGAGAATTGGTCAAACTCATCCAA
TATTCAATCAACCAAATTGTATTTGCTTCCTCATGTTTGGGGAACTCACAAATTGGCCAAATGACTGATATAATTTGATAGAACATGTCATGCATCTACTXXXXXXXXXXCTCCTTAGCCTAAGTAATTATATATTATATTTTACACATGGCTTTAACACACCTTAGGTAGGTTATGTGACAACTTGGAGAATTGGTCAAACTCATCCAA
* * *
>Marker240786
TAGGATGCTTTATGCTGCTTTTAAAGGATTTAATAATCTTCATGGATGATTAGTTTGCTTAAATTTAAATTACTTAGCTTAGTGGCTTCATAAGATACATXXXXXXXXXXAGAACCCTCAACAAAACTCCATTTGAACTGCCAATGGACACAATTAGCAGTCAAACATGTTAGTTATAGTTGCATGCATGAAAGGACATCATGAAACAAT
TAGGATGCTTTATGCTGCTTTTAAAGGATTCAATAATCTTCATGGATGATTAGTTTGCTTAAATTTAAATTACTTAGCTTAGTGGCTTCATAAGATACATXXXXXXXXXXAGAACCCTCAACAAAACTCCATTTGAACCGCCAATGGACACAATTAGCAGTCAAACATGTTAGTTATAGTTGCATGCATGAAAGGACATCATGAAACAAT
* *
>Marker275075
TAAATCTTTGTCAAATAGGGCTTCATGTCTTGATTCTAGCTTGACTGATTGGATTTGGTTAATTACTTCTCTATACAACAAAAGGGAAAAACCCTTGTAGXXXXXXXXXXAGAGGAGCTCTGGAGAGATGTTGAGACATAGACAACTGAAGGCCTGATCGCACTTGTTTAACCATTTAGCTTTAGCATCATCATCAGATGGTTCCATTTA
TAAATCTTTGTCCAATAGGGCTTCATGTCTTGATTCTAGCTTGACTGATTGGATTTGGTTAATTACTTCTCTATACAACAAAAGGGAAAAACCCTTGTAGXXXXXXXXXXAGAGGAGCTCTGGAGAGATGTTGAGACATAGACAACTGAAGGCCTGATCGCACTTGTTTAACCATTTAGCTTTAGCATCATCATCAGATGGTTCCATTTA
*
>Marker193210
AAATTATGGAAAAAATAGTCTCATTCATGGAGCTCTCTCTGGTGGGTAAGTTTGAGGCCTTAATAAACCTAACATTGACATAGTGAGGAGATGGGTTTCCXXXXXXXXXXAAATTAACACATAAGACAAGGATTTTTACGTGGAAATCCTGTTAAGGAAAAACCACAGGGTGACTAACCCAAGATTGTATTCTCTATTAAAAGAATAAGG
AAATTATGGAAAAAATAGTCTCATTCATGGAGCTCTCTCTGGTGGGTAAGTTTGAGGCCTTAATAAACCTAACATTGACATAGTGAGGAGATGGGTTTCCXXXXXXXXXXAAATTAACACATAAGACAAGGATTTTTACGTGGAAATCCTGTTAAGGAAAAACCACAGGGTGACTAACCCAAGATTGTATTCTCTGTTAAAAGAATAAGG
*
>Marker146408
TAGAATTTGAGGTTCTTGCATAGTATTATCATGCTCTTGTGTATATAGAGGATTTGATGATGGTTTGAGAATGTCTTTGTAAGTATCAGGTATGAACATGXXXXXXXXXXAAAGATGATGGGTGTAAATGGATAATCTGTTGGCAAGAGACACTGTGTGGCTTCATAAGTGTTGTCATTGATGGCAAAAAAGTCTATCCCACACATCTGC
TAGACTTTGAGGTTCTTGCATAGTATTATCATGCTCTTGTGTATGTAGAGGATTTGATGATGGTTTGAGAATGTCTTTGTAAGTATCAGGTATGAACATGXXXXXXXXXXAAAGATGATGGGTGTAAATGGATAATCTGTTGGCAAGAGACACTATGTGGCTTCATAAATGTTGTCATTGATGGCAAAAAAGTCTATCCCACACATCCGC
* * * * *
>Marker194120
TCAGAGGTATTTTTATTGGCCAGAGATGCATCATGATGTCATTTCCCATATTTGTGCTTGTTCAGATTGTGCTATTGCAAAGCCTACAAACCAAAATCAAXXXXXXXXXXGTATATTCCTCAGCAAATTTTGGTCATCACCTTGGGCCATGATGAACACCAAGTTGACAAAATCCACTGCATTCCATCCACAAATTGATGGACAAATTGA
TCAGAGGTATTTTTATTGGCCAAAGATGCATCATGATGTCATTTCCCATATTTGTGCTTGTTCAGCTTGTGCTATTGCAAAGCCTACAAACCAAAATCAAXXXXXXXXXXGTATATTCCTCAGCAAATTTTGGTCATCACCTTGGGCCATGATGAACACCAAGTTGACAAAATCCACTGCATTCCATCCACAAATTGATGGACAAATTGA
* *
>Marker275830
TTTGGGGTTTGTTATAGACAAAGGGAAGACCGTTTGACTTAATTGATAATACTCAATCCTTGTGATTGATGTGACAAGAATAAAACACACCAAAAAGAGAXXXXXXXXXXCAACACACATAACACAAGGATTTTTACGTGGAAAACCCTGTTAAGGGAAAGACCACAGGGTGACTAACCCAAGATTGTATTCTCTGTTAAAAGAATAAGA
TTTGGGGTTTGTTATAGACAAAGGGAAGACTGTTTGACTTAATTGATAATACTCAATCCTTGTGATTGATGTGACAAGAATAAAACACACCAAATAGAGAXXXXXXXXXXCAACACACATAACACAAGGATTTTTACGTGGAAAACCCTGTTAAGGGAAAAACCACAGGGTGACTAACCCAAGATTGTATTCTCTGTTAAAAGAATAAGA
* * *
>Marker431201
TTCTTCCTTTATCTCTCTATTTTTGTTATTTAGATTATCTCTTTCATGCAATAGTGGTGATATATTCTCTATTCAGTTTATTCATGTCACTTGGAAGCCAXXXXXXXXXXTCTTCATAACAAGTTAGCATAGTCTCTTTTCTTCATTCATAACACTTTAAGGATTGTTGATGTGGTTGTAATGAAAAGTTCATTCATAACAATAGGAGGC
TTCTTCCTTTATCTCTCTATTTTTGTTATTTAGATTATCTCTTTCATGCAATAGTGGTGCTATATTCTCTATTCAGTTTATTCATGTCACTTGGAAGCCAXXXXXXXXXXTCTTCATAATAAGTTAGCATAGTCTCTTTTCTTCATTCATAACACTTTAAGGATTGTTGACGTGGTTGTAATGAAAAGTTCATTCATAACAATAGGAGGC
* * *
>Marker67698
TTTCAACCACCCACCTACATATCTCCAACAAGATGATCTGGTCACCTGGATACCTGGGCAGTTTGTATGGAGCCTTGTCAAATCCCATTACCTAAATGTAXXXXXXXXXXGCTTGGTAAGCCAGGAGGTAAACTAGATAAGAAGTCATGTAAAATTATTTTGTCTCCATGACTTAGACAACAACTGATCATTCAACTTGTCACTAATGAA
TTTCAACCACCCACCTACATATCTCCAACAAGATGATCTGGTCACCTGGATACCTAGGCAGTTTGTATGGAGCCTTGTCAAATCCCATTACCTAAATGTAXXXXXXXXXXGCTTGGTAAGCCAGGAGGTAAACTAGATAAGAAGTCATGTAAAATTATTTTGTCTCCATGACTTAGACAACAACTGATCATTCAACTTGTCACTAATGAA
*
>Marker172192
TGTATAGTGAATGATAAATTATGATAAGCACATGTGGGCTTGATATGTCATCAAGGAAGGTAGGTTGCCCCCAACATGGGGTAATTTAAAGATAATAGTGXXXXXXXXXXTGCCCCCCTAATGCAACAAGTGATCATAATGATGTAAGATGTAAGCATGTTCAATATCATACCAAATAAGAGACCTCATATGGGCCAAATGATGTGTTAA
TGTATAGTGAATGATAAATTATAATAAGCACATGTGGGCTTGATATGTCATCAAGGAAGGTAGGTTGCCCCCAACATGGGGTAATTTAAAGATAATAGTGXXXXXXXXXXTGCCCCCCTAATGCAACAAGTGATCATAATGATGTAAGATGTAAGCATGTTCAATATCATACCAAATAAGAGACCTCATATGGGCCAAATGATGTGTTAA
*
>Marker192606
CTTCCTTTTACATTTAAGACACAAAAGCTCTACTTGATTGAGCTATAGTGAAATTAGGTAACAATAACTTTTTAAACATTTCAATTAGTGTTTATATTTTXXXXXXXXXXATTTATCAAATTGGGGAAAAAAAATAATCCATGCACTAAAGTTTTGAGTTATGAATACACAAAAAATATAGAAGGAAAACAAATGAAATTTACTATATAA
CTTCCTTTTCCATTTAAGACACAAAAGCTCTACTTGATTGAGCTATAGTGAAATTAGGTAACAATAACTTTTTAAACATTTCAATTAGTGTTTATATTTTXXXXXXXXXXATTTATCAAATTGGGGAAAAAAAATAATCCATGCACTAAAGTTTTGAGTTATGAATACACAAAAAATATAGAAGGAAAACAAATGAAATTTACTATATAA
*
>Marker60812
AAGTTGCATGACTAAATGAGCTAGAACTCCTAGATGAGAAATGACTGGATGATCTTAATCATCTTCAAGCCTACCAGAAGTGCCTACACAAAAGCTACAAXXXXXXXXXXAAAATATAAAAAAGCCAAAAAAGCAAAAAATTCAAAAAAAAATTAAGAAAAACCTGGGTGCCATCCAATGGTGAAAATCACTTTGGTAATGCCTTGGATA
GAGTTGCATGACTAAATGAGCTAGAACTCCTGGATGAGAAATGACTGGATGATCTTAATCATCTTCAAGCCTACCAAAAGTGCCTACACAAAAGCTACAAXXXXXXXXXXAAAATATAAAAAAGTCAAAAAAGCAAAAAATTAAAAAAAAAATTAAGAAAAACCTGGGTGCCATCCAATGGTGAAAATCACTTTGGTAATGCCTTGGATA
* * * * *
>Marker143471
TATCCCATATCTGTTTAAGTGTTGTAGAATCCTCAATATGGAACAAAATATGTAAAGCAATCAAACCCATAACCTCATTATGTTTGTTCTTGTGAGCAAAXXXXXXXXXXGACTTTATAATTAGTGCAATTACAGTTGCCGCTTGCTAAATTAACAAAGAGGCCTTGATGTTAGTATATTGCATATGTCAAATTAGGATATAAAGTAGAA
TATCCCATATCTGTTTAAGTGTTGTAGAATCCTCAATATGGAACAAAATATGTAAAGCAATCAAACCCATAACCTCATTATGTTTGTTCTTGTGAGCAAAXXXXXXXXXXGACTTTATAATTAGTGCAATTATAGTTGCTGCTTGCTAAATTAACAAAGAGGCCTTGATGTTAGTATATTGCATATGTCAAATTAGGATATAAAGTAGAA
* *
>Marker321012
ATAAATTTGACTCCTTTGTGTTTGGTTTGAGATTTTTGAAATCTAAATAAGATCATTGCATTTATTATAATATGGATAGTCATTGATTCCTTGTTATTGCXXXXXXXXXXGTTATCTATAGAGCAGTGTTCATCTACATCTAGTGAGATGAAGGACATGGCTTGAGTAACATATAATAGTGTTGTAGGGAGTTTGATGTATTCCATGGTT
ATAAATTTGACTCCTTTGTGTTTGGTTTGAGATTTTTGAAATATAAATAAGATCATTGCATTTATTATAATATGGATAGTCATTGATTCCTTGTTATTGCXXXXXXXXXXGTTATCTATAGAGCAGTGTTCATCTACATCTAGTGAGATGAAGGACATGGCTTGAGTAACATATAATAGTGTTGTAGGGAGTTTGATGTATTCCATGGTT
*
>Marker177358
TTTACCGAGGGGTTCCTTGTCTGGAGATTTGTGTGTTTCCAGAGATGGATGTGCTTCAAGAAGAGTTTTAGTAGTAGGCAACTGATGTGACTCTGAAATAXXXXXXXXXXTCCATGTTTAGTTTCTACAAGAACTTCTATTGTAGTTCCTTCGACAAAAATTTCTTCTACAAATACCTACCCACTATCCACAGGCTCTTCTTGAGCTTAC
TTTACCCAGGGGTTCCTTGTCTGGAGATTTGTGTGTTTCCAGAGATGGATGTGCTTCAAGAAGAGTTTTAGTAGTAGGCAACTGATGTGACTCTGAAATAXXXXXXXXXXTCCATGTTTAGTTTCTACAAGAACTTCTATTGTAGTTCCTTCGACAAAAATTTCTTCTACAAATACCTACCCACTATCCACAGGCTCTTCTTGAGCTTAC
*
>Marker247902
GGTCTTTTACTAGGTTAATTCATAAATTGAAATCCATCCCAAACAAACTTAAACCATTTTTATAACTATCATTTTATTGAGCACATGTTTGGTTAAATATXXXXXXXXXXCTGAAACCCCTAAGTATAAGGAGTTGGCTAATTTTTAGGGGGTTTTAGACAAATCAGTTGGAGGAACCAACAAATTGGTGACTCTACTGGGGATTTAGCT
GGTCTTTTACTAGGTTAATTCATAAATTGAAATCCATCCCAAACAAACTTAAACCATTTTTATAACTATCATTTTATTGAGCACATGTTTGGTTAAATATXXXXXXXXXXCTGAAACCCCTAAGTATAAGGATTTGGCTAATTTTTAGGGGGTTTTAGACAAATCAGTTGGAGGAACCAACAAATTGGTGACTCTACTGGGGATTTAGCT
*
>Marker97761
AACAATAGGGATTCTCCTTGGCGGCATTCTTCCTTGGATCAAGTGTAACTACTCCAAGTTCAGTGATCGAGATACAAGGTGACAACTACCTCACAATCAGXXXXXXXXXXTTCATTCATTCAGTATATCATAGAATTCAAATACAAATTGGCCAAAAACATGTGGGATTACAATTAGGGCTCACATGCCTGATTTCATAGTTACAGAATA
AACAATAGGGATTCTCCTTGGCGGCATTCTTCCTTGGATCAAGTGTAACTACTCCAAGTTCAGTGATCGAGATACAAGGTGACAACTACCTCACAATCAGXXXXXXXXXXTTCATTCATTCAGTATATCATAGAATTCAAATACAAATTGGCCAAAAACATGTGGGATTATAATTAGGGCTCACATGCCTGATTTCATAGTTACAGAATA
*
>Marker285936
TCCATTTAATGTGGATAGGATTGAAGAGTGTGGAGAAGAACCTATGGAAATCTTCAATTTCCATAAGGTATTTAATGAGGATGTATATGCTGCAGGTTGTXXXXXXXXXXGGTTGGTTGCAACCTGAAAGGATGATTCTATCACTCAACTCAACTTTTGTGAGTCTATGCTCACAAACTTTTACCTGACATGTCTGAGCACCCAGACACA
TCCATTTAATGTGGATAGGATTGAAGAGTGTGGAGAAGAACCTATGGAAATCTTCAATTTCCATAAGGTATTTAATGAGGATGTATATGCTGCAGGTTGTXXXXXXXXXXGGTTGGTTGCAACCTGAAAGGATGATTCTATCACTCAACTCAACTTTTGTGAGTCTATGCTCACAAACTTTTACCCAACATGTCTAAGCACCCAGACACA
** *
>Marker150492
CTCTTGGAGAGAGATTTCCTCTTGAACTTGATTTACCTAAACAACTTCTAAGTTAGATTCAACCATTAACTTAGCTAACCCATGTCCTCTCACTAACTTTXXXXXXXXXXTTCACATCCTTCATCATTCGTTTGCAGTAAAACTGTAGCTATGGTGTGAAAAGAAACAAACGAAAAAAGTTGAAATGGCCTTGAAAAATAAGGTGATTTC
CTCTTGGAGAGAGATTTCCTCTTGAACCTGATTTACCTAAACAACTTCTAAGTTAGATTCAACCATTAACTTAGCTAACCCATGTCCTCTCACTAACTTTXXXXXXXXXXTTCACATCCTTCATCATTCGTTTGCAATAAAACTGTAGCTATGGTGTGAAAAGAAACAAATGAAAAAAGTTGAAATGGCCTTGAAAAATAAGGTGATTTC
* * *
>Marker113484
TTGATGCATATTGTTCCTATATGTTCATTCCATATTTTTGCATACACAATGATCTCCTCCACATGTAAAACATCCATCCTTTGATCCATTTTACCCAAGTXXXXXXXXXXCATTATTAATGGACTATGAAGATTCACTTCAGACCCAATTTGGGGTTTCAATCCCAAAATGAACTTCCTAACTCGAAAGCATTCATCATGTTGATAAAGA
TTGATGCATATTGTTCCTATATGTTCATTCCATATTTTTGCATACACAATGATCTGCTCCACATATAAAACATCCATCCTTTGATCCATTTTACCCAAGTXXXXXXXXXXCATTATTAATGGACTATGAAGATTCACTTCAGACCCAATTTGGGGTTTCAATCCCAAAATGAACTTCCTAACTCGAAAGCGTTCATCATGTTGATAAAGA
* * *
>Marker125564
TTCTTCCTTTTCTTTGTTATTAGCAAGTCATCATCTAATGGCTCCCCATCTAGTGGTTCCTCCTCTTCCTCTATAATCATAGGAGTAGGGTTTGTAACAGXXXXXXXXXX-ATCAACACATGAGAAGAAACAAATGAACACAGAACACTAGGATTTTTATGTGGAAACTCGGTTAAGGGAAAACCATGGTAGGGGTTAACCCACAAAGATT
TTCTTCCTTTTCTTTGTTATTAGCAAGTCATCATCTAATGGCTCCCCATCCAGTGGTTCCTCCTCTTCCTCTATAATCATAGGAGTAGGGTTTGTAACAGXXXXXXXXXX-ATCAACACATGAGAAGAAACAAATGAACACAGAACACTAGGATTTTTATGTGGAAACTCGGTTAAGGGAAAACCATGGTAGGGGTTAACCCACAAAGATT
TTCTTCCTTTTCTTTGTTATTAGCAAGTCATCATCTAATGGCTCCCCATCCAATGGTTCCTCCTCTTCCTCTATAATCATAGGAGTAGGGTTTGTAACAGXXXXXXXXXXCATCAACACATGAGAAGAAACAAATGAACATAGAACACTAGGATTTTTATGTGGAAACTC-GTTAAGGGAAAACCACGGTAGGGGTTAACCCACAAAGATT
* * * *
>Marker267024
ACTATCTCAACAACAAAACCAAGAGTTGGGAATTGATACAATTTGTCATTTAAGACAAGTTTTCTCTCATTTCATTGCCTCAAGTATCCTAGGCTATGATXXXXXXXXXXGGGTTTTTGTAACACTTAACCTAGTCAACATTTGTCCTACCCATAGGTAGTTAATTACATGTTATAACCTTCTAAGTATATATTTCCTAGACAATACTTA
ACTATCTCAACAACAAAACCAAGAGTTGGTAATTGATACAATTTGTCATTTAAGACAAGTTTTCTCTCATTTCATTACCTCAAGTATCCTAGGCTATGATXXXXXXXXXXGGGTTTTTGTAACACTTAACCTAGTCAACATTTGTCCTACCCATAGGTAGTTAATTACATGTTATAACCTTCTAAGTATATATTTCCTAGACAATACTTA
ACTATCTCAACAACAAAACCAAGAGTTGGGAATTGATACAATTTGTCATTTAAGACAAGTTTTCTCTCATTTCATTACCTCAAGTATCCTAGGCTATGATXXXXXXXXXXGGGTTTTTGTAACACTTAACCTAGTCAACATTTGTCCTACCCATAGGTAGTTAATTACATGTTATAACCTTCTAAGTATATATTTCCTAGACAATACTTA
* *
>Marker250581
CAATTGTCATGACCTCTTGGTTTAGGTAGATTGGTAAAGCCTTGTTTACTCCCAGGCATGTTAAGGAGGTCAAAACAACAGATACCAAGTTTGAACAATAXXXXXXXXXXTTTTACATATGTTATTCAGATTCCAAGCAGCGGATTCAAAGATCTTGTAATGCTATTGTCAGCAAGAAGTCTAAGACATATTCCCTCATCCTCAGCTTAA
CAATTGTCATGACCTCTTGGTTTAGGTAGATTGGTAAAGCCTTGTTTACTCCCAGGCATGTGAAGGAGGTCAAAACAACAGATACCAAGTTTGAACAATAXXXXXXXXXXTTTTACATATGTTATTCAGATTCCAAGCAGCGGATTCAAAGATCTTGTAATGCTATTGTCAGCAAGAAGTCTAAGACATATTCCCTCATCCTCAGCTTAA
*
>Marker139125
CTATTTCTTTATCTTGTGGCTCTATGGCTATTGGCTATTCTTAAATATCATCCATTGAAGTGGATGATATTTAAATAGAGTGCTCGGAGACTACTCTACAXXXXXXXXXXATCCACACAAATCACGTAGTCAAACTAGGTTGCTGAATACTTGCACGTCGACACAACAATAAAAAATCACATCTACGAACTGAGTGTCCACTACCATGAT
CTATTTCTTTATCTTGTGGCTCTATGGCTATTGGCTATTCTTAAATATTATCCATTGAAGTGGATGATATTTAAATAGAGTGCTCGGAGACTACTCTATAXXXXXXXXXXATCCACACAAATCACGTAGTCAAACTAGGTTGCTGAATACTTGCACGTCGACACAACAATAAAAAATCACATCTACGAACTGAGTGTCCACTACCATGAT
* *
>Marker381769
TTCACAATGGATGTTTCTTGTCAATTGTTAAGAGATGGTTTGCCTACTAATGTTAACATAGGATGACTAATGACTAATTACCTACATGAGGATAAATACCXXXXXXXXXXATGGGAAATTGGGCTAGGCAAATTATGAACAATGAAAGGTGGCATAATTGGGTGTCGGAAAGGGCCTTGAGTCAATGAGTGTGCAAAAATAGTCAAATTA
TTCACAATGGATGTTTCTTGTCAATTGTTAAGAGATGGTTTGCCTACTAATGTTAACATAGGATGACTAATGACTAATTACCTACATGAGGATAAATACCXXXXXXXXXXATGGGAAATTGGGCTAGGCAAATTATGAACAATGAAAGGTGGCATAATTGGGTGTTGGAAAGGGCCTTGAGTCAATGAGTGTGCAAAAATAGTCAAATTA
*
>Marker236330
CAAACCTAAAATACCTAATAGAAGCTTGCATGTAGACCTTCCCCATTCCTCTTGAGCAAAAGGGAAGTCTAACTAAATAGTGAAAACCCTTGGTGGTGCTXXXXXXXXXXAAGTAAATAGGAGGATTGCTGATGTCCATACTCTTAGGTGGAGATAAGTCCAAGCTCGAAGCTACGAGGGTGGCATCTATCAGAGAAAATAAAAGAGAAA
CAAACCTAAAATACCTAATAGAAGCTTGCATGTAGACCTTCCCCATTCCTCTTGAGCAAAAGGGAAGTCTAACTAAACAGTGAAAACCCTTGGTGGTGCTXXXXXXXXXXAAGTAAATAGGAGGATTGCTGATGTCCATACTCTCAGGTGGAGATAAGTCCAAGCTCGAAGCTACAAGGGTGGCATCTATCAGAGAAAATAAAAGAGAAA
CAAACCTAAAATACCTAATAGAAGCTTGCATGTAGACCTTCCCCATTCCTCTTGAGCAAAAGGGAAGTCTAACTAAACAGTGAAAACCCTTGGTGGTGCTXXXXXXXXXXAAGTAAATAGGAGGATTGCTGATGTCCATACTCTTAGGTGGAGATAAGTCCAAGCTCGAAGCTACGAGGGTGGCATCTATCAGAGAAAATAAAAGAGAAA
* * *
>Marker271013
AAGGCTGGAAATACATTTTCTATGATAGAATTGATCACCTACAATTGGATACTCATGTTTGCACATGGAAAATAGATGCCTACAACCACATATGATGGAGXXXXXXXXXX--GAAATTGTCCTTGCCACCAAAGTTGACTTTGTGTTTGAGCAACAAATTTGAGCCATTGGATCAAATTGATCATAGCCACTGGATCTTGAGGTGAAAACTT
AAGGCTGGAAATACATTTTCTATGATAGAATTGATCACCTACAATTGGATACTCATGTTTGCACATGGAAAATAGATGCCTACAACCACATATGATGGAGXXXXXXXXXXTAGAAATTGTCCTTGCCACCAAAGTTGA--TTGTGTTTGAGCAACAAATTTGAGCCATTGGATCAAATTGATCATAGCCACTAGATCTTGAGGTGAAAACTT
*
>Marker207318
TTTTTAATTAATAAAGGAGCCTTTTTTTACCTTCTCATAACTGTGGTATTCTATAACATATTGAAATGATTGATCTTATCTTGTGATGAAACTATGTAACXXXXXXXXXXCAAGTATAAGTCATCAAACATTTAGCTGTATGACCTCATTTTCAAGCTTTAAGTTCAATTTTGTGCTTAGTTCTATCCCTTTTCCTTGTTGTAGTAGTAG
TTTTTAATTAATAAAGGAGCCTTTTTTTACCTTCTCATAACTGTGGTATTCTATAACATATTGAAATGATTGATCTTATCTTGTGATGAAACTATGTAACXXXXXXXXXXCAAGTATAAGTCATCAAACATTTAGTTGTATGACCTCATTTTCAAGCTTTAAGTTCAATTTTGTGCTTAGTTCTATCCCTTTTCCTTGTTGTAGCAGTAG
* *
>Marker137684
AAACCCTAATGAGGCATCCACATCCCAATCTACCCCATAATCCCAAACATCCCACTCCCCATCTAAAACTCATGTAATTCCTAAGTCCATTTGGGTCCCTXXXXXXXXXXGTGAAATGCGGATTTGGAGAAGTCAAGAGGACTACCTTGAGTGGTATATTCTAAGGATTTAGCCTCCGGTGATAGATGAGGAAAAATATATGAATAGTTG
AAACCCTAATGAGGCATCCACATCCCAATCTACCCCATAATCCCAAACATCCCACTCCCCATCTAAAACTCATGTAATTCCTAAGTCCATTTGGGTCCCTXXXXXXXXXXGTGAAATACGGATTTGGAGAAGTCAAGAGGACTACCTTGAGTGGTATATTCTAAGGATTTAGCCTCCGGTGATAGATGAGGAAAAATATATGAATAGTTG
*
>Marker182728
TCTGATATGTCATGGTTTCCTTCAATGTAATGCTTATTCCTTTATGTATTCAAACTTGTAAATGAATAACCATTGTGATGAATGAATACTTATATCATTTXXXXXXXXXXCATTTTGACAAATGAGATATACAAAAATGGAATAAACACTGCATTGAATGAAAGGAAGATAGATTAAATGTCCCACACAAGCCATGGGAATAACTGAACC
TCTGATATGTCATGGTTTCCTTCAATGTAATGCTTATTCCTTTATGTATTCAAACTTGTAAATGAATAACCATTGTGATGAATGAATACTTATATCATTTXXXXXXXXXXCATTTTGACAAATGAGATATACAAAAATGGAATAAACACTGCATTGAATGAAAGGAAGATAGATTAAATGTCCCACACAAGCCATGGGAATAGCTGAACC
*
>Marker176053
TCATTTATCAAACAATCTTCTTTCCATCTATCAGATCACGCATGGTGGAGCAAGGAAGACTATGGAATTCACACCTGATTCAATTATCATTAGAGACTTGXXXXXXXXXXGGGTCTTTACACCTACCTTCTCCTATTGTGTTGCTACCCACTATATGGCACATGTAGCTCTCTATGTTTTCTTGCTTCCATTCATGGCAATACAATCTCA
TCATTTATCAAACAATCTTCTTTCCATCTATCAGATCACGCATGGTGGAGCAAGGAAGACTATGGAATTCACACCTGATTCAATTATCATTAGAGACTTGXXXXXXXXXXAGGTCTTTACACCTACCTTCTCCTATTGTGTTGCTACCCACTATATGGCACATGTAGCTCTCTATGTTTTCTTGCTTCCATTCATGGCAATACAATCTCA
*
>Marker143629
CTTTCCTCTTCATGCTCAGGGCTCTGTTCAACTTCCATTTCAGCCTGAGTGCTTTGTTCCTCCTCTTCACTTAAGAAATCACTAGATTCTTCTTCTATTTXXXXXXXXXXTCTAATTTGTTGCCCTGCTACCTCTTTGGAAGTCTGTGCTTCCTCTGCACTAACCTCATGACTTAGTGAATTTGCACCTACAAAAGTATCTGATGACACT
CTTTCCTCTTCATGCTTAGGGCTCTGTTCAACTTCCATTTCAGCCTGAGTGCTTTGTTCCTCCTCTTCACTTAAGAAATCACTAGATTCTTCTTCTATTTXXXXXXXXXXTCTAATTTGTTGTCCTGCTACCTCTTTGGAAGTCTGTGCTTCCTCTGCACTAACCTCATGACTTAGTGAATTTGCACCTACAAAAGTATCTGATGACACT
* *
>Marker142864
CACAATTTCATCAACAAAAGTTTATTCACACATTTGAGTTGCTTTATTTTTCCAGCACTAGAATTTCAAGTTATGATTGTAGATGGGAGTATTGTTAGTTXXXXXXXXXX-CAACATGAAATACACAATATATGATCAATAAAAGCACACCACAAGTCTGAAATTTTGAAGACAACTCTGCTGTTATAAATCAGATTATAGAAGTCTGAAA
CACAATTTCATCAACAAAAGTTTATTCACACATTTGAGTTGCTTTATTTTTCCAGCACTAGAATTTCAAGTTATGATTGTAGATGGGAGTATTGTTAGTTXXXXXXXXXXACAACATGAAATACACAATATATGATCAATAAAAGCAC-CCACAAGTCTGAAATTTTGAAGACAACTCTGCTGTTATAAATCAGATTATAGAAGTCTGAAA
>Marker173070
AACATATATGATGTATCATGATCATATTTTTGATGTATATATATGATGAGACATGGTGGTGACTATATGATATTATGATGGATGTGATGATGTATGTTTAXXXXXXXXXXACGATTTATGATGGATACACATGCTAATTATTGATGTTTTTTGATATTATGGATAATGATTATGTTGAAGTAGATATGTTATGGCTTATGATTATGGTAT
GACATATATGATGTATCATGATCATATTTTTGATGTATATATATGATGAGACATGGTGGTGACTATATGATATTATGATGGATGTGATGATGTATGTTTAXXXXXXXXXXATGATTTATGATGGATACACATGCTAATTATTGATGTTTTTTGATATTATGGATAATGATTATGTTGAAGTAGATATGTTATGGCTTATGATTATGGTAT
* *
>Marker117661
TTTGTGTCTATGAGACTCCTAGTAAAGCTAGTCAAAACCTTAAGTGGTTTATCAAGTGCTCATAATTTACCGATCCCTCGAATGTTCCCCCACTGAACACXXXXXXXXXXTGTTGACATTTGCGTTGGAGATTCCAAGTTGTGGGCTTGGCAAGTCACCATTCACCTTGACCTTAGGTAGTTTAAGCATTGTCTTCAAGTGCTTTTCGAT
TTTGTGTATATGAGACTCCTAGTAAAGCTAGTCAAAACCTTAAGTGGTTTATCAAGTGCTCATAATTTACCGATCCCTCGAATGTTCCCCCACTGAACACXXXXXXXXXXTGTTGACATTTGCGTTGGAGATTCCAAGTTGTGGGCTTGGCAAGTCACCATTCACCTTGACCTTAGGTAGTTTAAGCATTGTCTTCAAGTGCTTTTTGAT
* *
>Marker201389
TAAGATGAGGGTAGGTTGGGTGTGATCCCAACCAACAACTGGAAATCTAGTGATATAGGTATAAGAATTTTCTATTTTAAATATTTTTTGAATTTATGAAXXXXXXXXXXACTATCATAAATGATTGTGTTAGGTAGTTTTTATTAGAATAATGGGATAGCGAAAATGTTTTATGTCACGTGCTTTATGATGTATAGGATTTGGTAGAGG
TAAGATGAGGGTAGGTTGGGTGTGATCCCAACCAACAACTGGAAATCTAGTGATATAGGTATAAGAATTTTCTATTTTAAATATTTTTTGAATTTATGAAXXXXXXXXXXACTATCATAAATGATTGTGTTAGGTAGTTTTTATTAGAATAATGGGATAGCAAAAATGTTTTATGTCACATGCTTTATGATGTATAGGATTTGGTAGAGG
* *
>Marker344012
AATAGTAAATTTCTATCTTAAGTAGATGTGTTTTATTAGTTAAACTACTCTTATCTCTTAAGTAGACTCATTTGGTAATCATGCTATCCATGTTTCAAATXXXXXXXXXXAAGCCAAGAATTTAATGGCTTACTACTAATAACCAATCTTATGCTCTCACCTTGCCCTTCATAGGATCTTAGTTGATCAGAAATTGGGGAATGTAACTTG
AATAGTAAATTTCTATCTTAAGTAAATGTGTTTTATTAGTTAAACTACTCTTATCTCTTAAGTAGACTCATTTGGTAATCATGCTATCCATGTTTCAAATXXXXXXXXXXAAGCCAAGAATTTAATGGCTTACTACTAATAACCAATCTTATGCTCTCACCTTGCCCTTCATAGGATCTTAGTTGATCAGAAATTGGGGAATGTAACTTG
*
>Marker399205
ACCATAAGCAAACCAATTAGGTGTGTTCCCCATTTTTGGTCATAATAAGCTTCATTCCTAGTTGCGATATATGTAGACAACCATTGTATCCTATTTATTTXXXXXXXXXXGGTAAGGTAAGCAGGAAGGCAAGTAACTCTTAAATGGAAGAAATCCCTTCATCATCTTTGGATGAGAATAAGTGCCTACTTGAGGAGTTCCAACATCTTT
ACCATAAGCAAACCAATTAGGTGTGTTCCCCATTTTTGGTCAGAATAAGCTTCATTCCTAGTTGCGATATATGTAGACAACCATTGTATCCTATTTATTTXXXXXXXXXXGGTAAGGTAAGTAGGAAGGCAAGTAACTCTTAAATGGAAGAATTCCCTTCATCATCTTTGGATGAGAATAAGTGCCTACTTGAGGAGGTCCAACATCTTT
* * * *
>Marker42176
TGGATACTCTAAGATACATAATGCAAGAAGTCTATAACATATACACTAGCTTGTATCAATCAAGATATGAGCTTATGACTAGAATCTAGAAAAAAACATTXXXXXXXXXXTACCATCTTACCATGCCCTTGAGATTCATCCCTTGAGCAAATTTATTACAAGAAATCTTGCATCTCTCATCAAGGATTGCATTATCAATTTCCTAAAGAT
TGGATACTCTAAGATACATAATGCAAGAAGTCTATAACATATACACTAGCTTGTATCAATCAAGATATAAGCTTATGACTAGAATCTAGAAAAAAACATTXXXXXXXXXXTACCATCTTACCATGCCCTTGAGATTCATCCCTTGAGCAAATTTATTACCAGAAATCTTGCATCTCTCATCAAGGATTGCATTATCAATTTCCTAAAGAT
* *
>Marker354528
TTAAGATCTGTGTGTCTTGAGGACTTGGAACTTGGTGTGCCTGAGAAGTGAGTGCACTGTAAGGGGTAGCCCATGCCCCAAGTTCTTGGAGCTATCCACTXXXXXXXXXXCACTTGTAAGCATGGACACGACATTCCCTAATAAGACCTATGAGAATGATACTTATGGCACCAATAAAATGTGTGATAGACTTGAGTGGTTGTATAGAAA
TTAAGATCTGTGTGTCTTGAGGACTTGGAACTTGGTGTGCCTGAGAAGTGAGTGCACTGTAAGGGGTAGCCCATGCCCCAAGTTCTTGGAGCTATCCACTXXXXXXXXXXCACTTCTAAGCATGGACATGACATTCCCTAATAAGACCTATGAGAATGATACTTATGGCACCAATAAAATGTGTGATAGACTTGAGTGGTTGTATAGAAA
* *
>Marker354631
TATACCAATTTGCATTAACACCCATTTTGGCATTGAACGAGCTTATCGACCATTTTGGTCTTGAACAAGCTTAGACATTCTGCCAGGGTTTATACACATTXXXXXXXXXXGGGAAAAGGCCATAGCAACCGAACACGAGTCTTATGAAAAATAAGACTTGGGATCTCACAGATCTTCCACAAAGGAAGAAACCCATTGGTTGCAAATGGG
TATACCAATTTGCATTAACACCCATTTTGGCATTGAACGAGCTTATTGACCATTTTGGTCTTGAACAAGCTTAGACATTCTGCCAGGGTTTATACACATTXXXXXXXXXXGGGAAAAGGCCATAGCAACCGAACACGAGTCTTATGAAAAATAAGACTTGGGATCTCACAGATCTTCCACAAAGGAAGAAACCCATTGGTTGCAAATGGG
*
>Marker233035
TTGTTTTTTATCAATGTTCCTCTGAGTTTCCAGGATGGGAGGACATGGGACCCGATTTTAGGAATGGAAAAAAATTTCCCAAATTTTGGGGACAAGGGAGXXXXXXXXXXGCTCCAAGTCCCCAAGTCCCTAGGACATCAACCCCTAGGGACACATCCCCATGGAATGCTCGTTTTTATGTTCCCTACATCTTATATATGAAGTATTAAG
TTGTTTTTTATCAATGTTCCTCTGAGTTTCCAGGATGGGAGGACATGGGACCCGATTTGAGGAATGGAAAAAAATTTCCCAAATTTTGGGGACAAGGGAGXXXXXXXXXXGCTCCAAGTCCCCAAGTCCCTAGGACATCAACCCCTAGGGACACATCCCCATGGAATGCTCGTTTTTATGTTCCCTACATCTTATATATGAAGTATTAAG
*
>Marker379953
TTTGATCGTTTCTTCCCTTTTTAATTGCTTTGGTGCAGCTGTAGCCCACCTTAAAATAAGGTGTTGCTTCAGGGGTGTAGTGTCATTTGCTTTCTGGACAXXXXXXXXXXAATAATGTTATGCGAAACAGTCGCAGGAGTGACAGCCCAGCGTCAGATGATGGTCATGGGCCAAGGGACAGCGCTAGTCCTGAGAGGGACAGTCCTGGAA
TTTGATCGTTTCTTCCCTTTTTAATTGCTTTGGTGCAGCTGTAACCCACCTTAAAATAAGGTGTTGCTTCAGGGGTGTAGTGTCATTTGCTTTCTGGACAXXXXXXXXXXAATAATGTTATGCGAAACAGTCGCAGGAGTGACAGCCCAGCGTCAGATGATGGTCATGGGCCAAGGGACAGCGCTAGTCCTGAGAGGGACAGTCCTGGAA
*
>Marker114949
AGAGTTTACACTTGTATGGATTCCAATCTTGGCTTTAACTTCTTTAATTGGGCTTGATACAAGGCTACCTTCCCCAATACTATTTCAAGGCCACTATGTTXXXXXXXXXXGATGCACATGTAACAACATGCCCCAAACTATGGCTTATTTGAGTAAGATTAGTTGTGATCATTGGCAAGACTAGGGGTCATCTCTATTCAAATTCAAATA
AGAGTTTACACTTGTATGGATTCCAATCTTGGCTTTAACTTCTTTAATTGGGCTTGATACAAGGCTACCTTCCCCAATACTATTTCAAGGCCACTATGTTXXXXXXXXXXGATGCACAAGTAACAACATGCCCCAAACTATGGCTTATTTGAGTAAGATTAGTTGTGATCATTGGCAAGACTAGGGGTCATCTCTATTCAAATTCAAATA
*
>Marker136043
CCAAAATTATGAGATATAAATTTAGGGATATGGGAAACATGTAAAAACATAATTATTCACCTCTGCATCATGGTTAGACACTAGACTGATCACCACATCAXXXXXXXXXXTCTCTCCCCCTTTGACATCAAGGACAAAGGGTCTAATGTGTTCTATTTATACCATCCCAAAATTGTATAAACTCCCCCTTACTATATGATTTATATAAAT
CCAAAATTATGAGATATAAATTTAGGGATATGGGAAACATGTAAAAACATAATTATTCACCTCCGCATCATGGTTAGACACTAGACTGATCACCACATCAXXXXXXXXXXTCTCTCCCCCTTTGACATCAAGGACAAAGGGTCTAATGTGTTCTATTTATACCATCCCAAAATTGTATAAACTCCCCCTTACTATATGATTTATATAAAT
*
>Marker29985
TTGATAAGTAATGGCATCTATTTGTTCAATCCTCCCAAGACTTATATGTCAATTAAGGTGATCCATTTCCCACTTTCTTGTCAATCCCAAAATGTTTTCAXXXXXXXXXXGACCATCTAACATTCTTCTACCCAATCATATAAAATTCCAATAACAGTGCCCATGTCTATATTCTTTTCATGTTGAATGAAATACATGTATTAAAAACAA
TTGATAAGTAATGGCTTCTATTTGTTCAATCCTCCCAAGACTTATATGTCAATTAAGGTGATCCATTTCCCACTTTCTTGTCAATCCCAAAATATTTTCAXXXXXXXXXXAACCATCTAACATTCTTCTACCCAATCATATAAAATTCCAATAACAGTGCCCATGTCTATATTCTTTTCATGTTGAATAAAATACATGTATTAAAAACAA
* * * *
>Marker142792
TTACTTATGTGTGAAATTCATTAATCATTGTGGGTTTTTACTACATATTCTACAAAGAGTTGTTTAGTATATATCACATTAGCATACATAATCATTAACAXXXXXXXXXXCCATGTGTGGCTACGGACTGTGAATGACTCCTAGAGACACTTCACAACTATTGACCCCTGAGCTCACCTCTCAGACCCAACACCTCACCATGCAACTCCA
TTACTTATGTGTGAAATTCATTAATCATTGTGGGTTTTTACTACATATTCTACAAAGAGTTGTTTAGTATATATCACATTAGCATACATAATCATTAACAXXXXXXXXXXCCATGTGTGGCTACGGACTGTGAATGACTCCTAGAGACACTTCGCAACTATTGACCCCTGAGCTCACCTCTCAGACCCAACACCTCACCATGCAACTCCA
*
>Marker261181
ATACTACTACCATCAATGACTCCCTACATCTAAGCCACCTACTGCTATAGCTGAGTAACCTGGCCTTCAACTCTTTGTAGTCTGACCTCTGTCCCTTGTCXXXXXXXXXXTCATCCCCCTTGATGCTGCTGTGTTTGCCATCGAGTAGATGGAACTAGATCAGGACCTGTATCTGAGGGCCCTGCACCTGATGCCCCCACTTGTCCCAAT
ATACTACTACCATCAATGACTCCCTACATCTAAGCCACCTACTGCTATAGCTGAGTAACCTGGCCTTCAACTCTTTGCAGTCTGACCTCTGCCCCTTGTCXXXXXXXXXXTCATCCCCCTTGATGCTGCTGTGTTTGCCATCGAGTAGATGGAACTAGATCAGGACCTGTATCTGAGGGCCCTGCACCTGATGCCCCCACTTGTCCCAAT
* *
>Marker311954
ACTTTGTAGGAGGCAAACATCCTAGTATGTAGGTTATTGTGCCTTCTATATTGTTATCATGTATTGCTTGTAACTGAAATAACCTCAAGGGATTCAACATXXXXXXXXXXCTGATGTTGTCATGAATTGAGCTTCTCTATTTAAAATATGAGATTCATATCTTGTCGTCTCAGTTTTCTACATATTGTTGGATATTATAGTGCAAAGGAA
ACTTTGTAGGAGGCAAACATCCTAGTATGTAGGTTATTGTGCCTTCTATATTGTTATCATGTATTGCTTGTAACTGAAATAACCTCAAGGGATTCAACATXXXXXXXXXXCTGATGTTGTCATGAATTGAGCTTCTCTATTTAAAATATGAGATTCATATCTTGTCGTCTTAGTTTTCTACATATTGTTGGATATTATAGTGCAAAGGAA
*
>Marker389046
AATGCTCAACAATATACATAATGTTAAGTTTATTATCAATTGGATCAACAACAACATCCACATCAAGAGTAGATGATCCATCATCTAAAATGGTTGATTGXXXXXXXXXXAAACTTGTTAATTTCATATGGCTGATCAACAAGTGAAGACTCAACTTGACTATTTTTTAAAATACCCCCCGACACAAATTTGATACGTTTAGAATTTTCT
AATGCTCAACAATATACATAATGTTAAGTTTATTATCAATTGGATCAACAACAACATCCACATCAAGAGTAGATGATCCATCATCTAAAATGGTTGATTGXXXXXXXXXXAAACTTGTTAATTTCATATGGCTGATCAACAAGTGAAGACTCAACTTGACTATTTTTTAAAATACCCCCTGACACAAATTTGATACGTTTAGAATTTTCT
*
>Marker196729
GTATAACTCTAGAATTTTACCACAAACATGTAGAATGGGCTACACATTGACTCAAACACAAGTATACTTGATTCTCACCACTAGACAACATTCCTACATGXXXXXXXXXXCAAACTTACAAGTCACAACAATGAAATGGTGGAGAATTCCCACACGATACACCATAGACCTTCACAATGGTTACTATAAACTTTCCAAATATTCACCTTT
GTATAACTCTAGAATTTTACCACAAACATGTAGAATGGGCTACACATTGACTCAAACACAAGTATACTTGATTCTCACCACTAGACAACATTCCTACATGXXXXXXXXXXCAAACTTACAAGTCACAACAATGAAATGGTGGAGAATTCCCACACGATACACCATAGACCTTCACAATGGTTACTATAAACTTCCCAAATATTCACCTTT
*
>Marker203873
TTGAGTCC---TAAAAATAAGGAATTGACTTCTCCTAAGGTGGTCACAATTAAAATTCTAACTGCCAACCCTCTCATCTCTTGACCTTGGACAAGGTGATTTAXXXXXXXXXXTATTGTTTGTGTGTTGTTGACCTTCTACCTTTTACTTTCTTTATTGTTGTTTCTATCTTGATGCCCACCACTTCTTGAAAAGTTTGGCTTTTTAGTTATT
TTGAGTCCTTCTAAAAATAAGGAATTGACTTCTCCTAAGGTGGTCACAATTAAAATTCTAACTGCCAACCCTCTCATCTCTTGACCTTGGACAAGGTGA--T-XXXXXXXXXXTATTGTTTGTGTGTTGTTGACCTTCTACCTTTTACTTTCTTTATTGTTGTTTCTATCTTGATGCCCACCACTTCTTGAAAAGTTTGGCTTTTTAGTTATT
>Marker324419
TTCTGTTTCACAAATCATACGAATTTAATGGAATTTTGCACGAATTTTTAGGGTTTTTAAAATATTCGCCAAATTTTAAAAAGAAAGAATTAAATGTGGCXXXXXXXXXXTTTATCTTGAGGAATAAACATTGCCTACAGAACTATCTCATAGATTTATAACACACAGTAACAAAGACAGAAGATTATATTTCTTAAACACAAAAAAAGA
TTCTGTTTCGCAAATCATACGAATTTAATGGAATTTTGCACGAATTTTTAGGGTTTTTAAAATATTCGCCAAATTTTAAAAAGAAAGAATTAAATGTGGCXXXXXXXXXXTTTATCTTGAGGAATAAACATTGCCTACAGAACTATCTCATAGATTTATAACACACAGTAACAAAGACAGAAGATTATATTTCTTAAACACAAAAAAAGA
*
>Marker106449
ATTTTTTTTTGTTTTGTTGTTAGTTCTCTTGGTTGTCCTTTGTCTTTTTGATGAGCTTTTAATGCTTTATCTCTCTTTCTATACAAGGGTCTGGGCCCTTXXXXXXXXXXGAAACAACCCGTAATAGCTTATTATAATGCCTTATTCACAGTGCTACAAAATATAATCACACTTAAAAACTAGCAGGTTCCTCTTTGAGGGTAGTAATTT
ATTTTTTTTTGTTTTGTTGTTAGTTCTCTTGGTTGTCCTTTGTCTTTTTGATGAGCTTTTAATGCTTTATCTCTCTTTCTATATAAGGGTCTGGGCCCTTXXXXXXXXXXGAAACAACCCGTAATAGCTTATTATAATGCCTTATTCACAGTGCTACAAAATATAATCACACTTAAAAACTAGCAGGTTCCTCTTTGAGGGTAGTAATTT
*
>Marker155713
GAAATAGAGAAACCCTTTGTAACTCTTTTTTTCTGAGTTTATTTTGCCAGTGAGGCATATTTTCAGTAACCAGTGAGGTTTTTTCCAGTGAGGCATATGAXXXXXXXXXXCCTATGTTATGTGTTGTTCCTATATGTCTCTTGTGCTTTGTGAATGCTTTCATGTCCTAATGCAATTGTCTTGTGTTTCATGATCATGTTATATTATTTT
GAAATAGAGAAACCCTTTGTAACTCTTTTTTTCTGAGTTTATTTTGCCAGTGAGGCATATTTTCAGTAACCAGTGAGGTTTTTTCCAGTGAGGCATATGAXXXXXXXXXXCCTATGTTATGTGTTGTTCCTATATGTCTCTTGTGCTTTGTTAATGCTTTCATGTCCTAATGCAATTGTCTTGTGTTTCATGATCATGTTATATTATTTT
*
>Marker324572
ACTTTTTTTCACAATAATTCAGTGAATACAAATCTGATTACAACATCAAAAAACAACTCTATGATCATTCATATTCTTCAACAAATAGTGAAACATATTGXXXXXXXXXXATGCGAGCACTTTATGTCCAACAACAAAGCCAAACATGATCTCTGATGATACATTATTTACAAGATGGGACCATTCCCTTCACAGGTGTGATCATAATAG
ACTTTTTTTCACAATAATTCAGTGAATACAAATCTGATTACAACATCAAAAAACAACTCTATGATCATTCATATTCTTCAACAAATAGTGAAACATATTGXXXXXXXXXXATGCGAGCACTTTATGTCCAACAACAAAGCCAAACATGATCTTTGATGATACATTATTTACAAGATGGGACCATTCCCTTCACAGGTGTGATCATAATAG
*
>Marker306698
TTGGTCAACATGCATCCCTAGGCTTAGGTTTTGAGTCTAGTATCTAGAATTGTGGATCTATAGTTTTGGGAACCAAAAAAACTTTGGTTCCATGATCCATXXXXXXXXXXACAATGTTGTATTGGGATAGGATTGATATGAATTCTACAATGGAATATTGTTTTTTTAGGTGATCACAATAATATGATTGGGATTTGTCTCTTAACATAG
TTGGTCAACATGCATCCTTAGGCTTAGGTTTTGAGTCTAGTATCTAGAATTGTGGATCTATAGTTTTGGGAACCAAAAAAACTTTGGTTCCATGATCCATXXXXXXXXXXACAATGTTGTATTGGGATAGGATTGATATGAATTCTACAATGGAATATTGTTTTTTTAGGTGATCACAATAATATGATTGGGATTTGTCTCTTAACATAG
*
>Marker129061
CTCTGAGGATCCTTCCATTTTCATTCTAGCTTTTTAAGACAGAGGTCTCTTACTGTCTTGGTATAGTTTGGGATATCCTTGATAGCTTGAGTGAGGGGAAXXXXXXXXXXCACCTCTACCCCATAAGTGGGGTATTGAATAGCCTCGTTAGTGTATGCCTACTGGATAGGCTTGTTATTGGGGATAGGTGTAGGTTGGATAAGCAGTTGT
CTCTGAGGATCCTTCCATTTTCATTCTAGCTTTTTAAGACAGAGGTCTCTTACTGTCTTGGTATAGTTTGGGATATCCTTGATAGCTTGAGTGAGGGGAAXXXXXXXXXXCACCTCTACCCCATAAGTGGGGTATTGAATAGCCTCATTAGTGTATGCCTACTGGATAGGCTTGTTATTGGGGATAGGTGTAGGTTGGATAAGCAGTTGT
*
>Marker544129
CACAATAAAATAGATTGTAGAGAACACGGCAATTGTCCAGAATCGTCCCCAGTATGAATCCGCCAAAAAAGCCCCCAGTAAGGGTGTTATGTAGCATGTTXXXXXXXXXXAATCTGGGATTAGTTCATATTGGTTGCAGATTTTTAAAGTTTGAATTTTAATGACATGTGCCTTGAAATTTTCGGGGATAAGATTATTCATTATAGTATC
CACAATAAAATAGATTGTAGAGAACACGGCAATTGTCCAGAATCGTCCCCAGTATGAATCCGCCAAAAAAGCCCCCAGTAAGGGTGTTATGTAGCATGTTXXXXXXXXXXAATCTGGGATTAGTTCATATTGGTTGCAGATTTTTAAAGTTTGAATTTTAATGACATGTGCCTTGAAATTTTCTGGGATAAGATTATTCATTATAGTATC
*
>Marker355369
AGAGTAAGGGCACTAGTTTATTAACCCACAACAAAATCTTACCAGATTCTTAGATTTATTAAACATAGTGCTAGAGTTTCCAAATCCATTGAATCCAAGTXXXXXXXXXXCATCTATGGACTAGAGTAGGGACACTAGTTTACTAACCCAAGGAAAATGTGGCAATACTAGGATAGGGGTGTTGGTTTACTAACCTAGGGAAAATGTGTT
AGAGTAAGGGCACTAGTTTATTAACCCACAACAAAATCTTATCAGATTCTTAGATTTATTAAACATAGTGCTAGAGTTTCCAAATCCATTGAATCCAAGTXXXXXXXXXXCATCTATGGACTAGAGTAGGGACACTAGTTTACTAACCCAAGGAAAATGTGGCAATACTAGGATAGGGGTGTTGGTTTACTAACCTAGGGAAAATGTGTT
*
>Marker138563
TAGGTCATTCATTTTACTGCTTTCTTTGCTTAAAATCCCGAGGACTCAAGACCAACACGTATGTTCTTTTCTCACGTCAAAGGGTGATCTTGAAAATCAAXXXXXXXXXXGGCCTCTCATACCTTGCGTATATCGAGGACACCCTAGAAGCCATTATAAACCTATATAAGACCATCAACCATTTCATAGTGTGATGCAAGGGATGCGAAC
TAGGTCATTCATTTTACTGCTTTCTTTGCTTAAAATCCCGAGGACTCAAGACCAACACATATGTTCTTTTCTCACGTCAAAGGGTGATCTTGAAAATCAAXXXXXXXXXXGGCCTCTCATACCTTGCGTATATCGAGGACACCCTAGAAGCCATTATAAACCTATATAAGACCATCAACCATTTCATAGTGTGATGCAAGGGATGCGAAC
*
>Marker207401
AATTGAGTTTTGCTATGTGATTGTTTGTTAGGTTGTATAGTTGGATAATCCTTTATTGGATCCTTTATCCATGACTACATCATATAGTATCAAAGTGAAAXXXXXXXXXXTAATGAAGATCTAATCGGATGTTGTAGAATAAGATAGAAGAAGAGATCATAACCCTAGAGATGATGAAATTGATAATGAAGAAATTAAAAGAAGGGAAAA
AATTGAATTTTGCTATGTGATTGTTTGTTAGGTTGTATAGTTGGATAATCCTTTATTGGATCCTTTATCCATGACTACATCATATAGTATCAAAGTGAAAXXXXXXXXXXTAACGAAGATCTAATTGGATGTTGTAGAATAAGATAGAAGAAGAGATCATAACCCTAGAGATGATGAAATTGATAATGAAGAAATTAAAAGAAGGGAAAA
* * *
>Marker292806
TTAAAGATATGATATCAAATAATAGAGCATGCTTAATAATCCATCTTCATACTAAAAAAATCATATGAAATATAGAAATGACCATTATAATGCATGCAATXXXXXXXXXXGCACATGGAAGAGAAGAATGATAAACCCTTTGAATATCAAACGACCATGTATTTATAATGTTCCAATTTTTTGGCCCTTTAGTTACCTGTAGAAAATCGA
TTAAAGATATGATATCAAATAATAGAGCATGCTTAATAATCCATCTTCATACTAAAAAAATCATATGAAATACAGAAATGACCATTATAATGCATGCAATXXXXXXXXXXGCACATGGAAGAGAAGAATGATAAACCCTTTGAATATCAAACGACCATGTATTTATAATGTTCCAATTTTTTGGCCCTTTAGTTACCTGTAGAAAATCGA
*
>Marker239618
TTGTTTGGGCATTAGGAAATATAGCTAGTGATAATTCTAAGTTTAGAGATCTAGTCCTCAGTCATGGTGCCCTTATGCCACTCTTGGCCCATCTGAATGA-XXXXXXXXXXCATTCAAGACACATGGATGCAAGGTTATGCTCCTATGCTTAACTATCGATAAAGAAGCAACACAACTTCGTAGCTTCATTCCTAGCACATAGGATTAAGG
TTGTTTGGGCATTAGGAAATATAGCTAGTGATAATTCTAAGTTTAGA-ATCTAGTCCTCAGTCATGGTGCCCTTATGCCACTCTTGGCCCATCTGAATGAGXXXXXXXXXXCATTCAAGACACATGGATGCAAGGTTATGCTCCTATGCTTAACTATCGATAAAGAAGCAACACAACTTCGTAGCTTCATTCCTAGCACATAGGATTAAGG
>Marker222299
CTAGTTGGTGTCCTATCCTCTAGTTGTCACATGTGATAAGAATGGGACACTTGTCACATGACTACAACTCCTTGATTGTTATCCTTGCCTTTATAAGAAAXXXXXXXXXXTATGTATATAATGATTGTCAAATCACTGAATTTTGTCATTGGAAAATTTTTGGCAAATTTTTTTTGCTCTTGGTTAGGGCTTTGGAGAAATGTATACACA
CTAGTTGGTGTCCTATCCTCTAGTTGTCACATGTGATAAGAATGGGACACTTGTCACATGACTACAACTCCTTGATTGTTATCCTTGCCTTTATAAGCAAXXXXXXXXXXTATGTATATAACGATTGTCAAATCACTGAATTTTGTCATTGGAAAATTTTTGGTAAATTTTTTTTGCTCTTGGTTAGGGCTTTGGAGAAATCTATACACA
* * * *
>Marker112605
TATTTGGATGCATTGGAACAGTTAGTTTGGTTGCATCAGGAGTAGAATGAAAGTTACAACCCTTTGCAACTTTATACTACCTCCTTACGATTTTTGGGGTXXXXXXXXXXACACATACTTTAATATTCACATATTCTCAATGGACCCTATATGATGTTTTTTGGATTTTGTTTCATACCTTATTTTAGCAAATTATGTCGTTTACTATGA
TATTTGGATGCATTGGAACAATTAGTTTGGTTGCATCAGGAGTAGGATGAAAGTTACAACCCTTTGCAACTTTATACTACCTCCTTATGATTTTTGGGGTXXXXXXXXXXACACATACTTTAATATTCACATATTCTCAATGGACCCTATATGATGTTTTTTGGATTTTGTTTCATACCTTATTTTAGCAAATTATGTCGTTTACTATGA
* * *
>Marker185851
GTTTGATGCCATTGGACTACAAATTGTCACTTTATGATCTAAAATGATGTTTTGATATTAGAGTTGGCTTTGTGATGCTATGATAGATAATAAACTAAAAXXXXXXXXXXCAACATCCATGCCTATTTTAATTTTGAATTATAAAAAGGTAGGGGTCATTTTCATGCCACAAAATCAAATTAGTGTAAAATTGAACTTAGCTGGCAAATG
GTTTGATGCCATTGGACTACAAATTGTCACTTTATGATCTAAAATGATGTTTTGATATTAGAGTTGGCTTTGTTTTGCTATGATAGATAATAAACTAAAAXXXXXXXXXXCAACATCCATGCCTATTTTAATTTTGAATTATAAAAAGGTAGGGGTCATTTTCATGCCACAAAATCAAATTAGTGTAAAATTGAACTTAGTAGGCAAATG
** **
>Marker347966
TAATCCCTCCACATTTAGTTTCTTAAGATAGCACTAATTTACATGCTTTATCATTCCCAATTGTCATTTAATTGACTAGGTTAATTGTGACTGATTTGCTXXXXXXXXXXCATCCTAGGACTTGCATAACTTTATTTAACAGAGCCTATGATTCTAAATACCTAAGTCAATGCATCGCCCTTATATAAAATCATCATATACATAATGAAG
TAATCCCTCCACATTTAGTTTCTTAAGATAGCACTAATTTACATGCTTTATCATTCCCAATTGTCATTTAATTGACTAGGTTAATTGTGACTGATTTGCTXXXXXXXXXXCATCCTAGAACTTGCATAACTTTATTTAACAGAGCCTATGATTCTAAATACCTAAGTCAATGCATCGCCCTTATATAAAATCATCATATACATAATGAAG
*
>Marker54210
TTTATTTATTAGCCTATATTATTTATCTAAAGCATAAATACAATATATTTATTTCTTTACAACTTTATATTCAACAATAAAATAGAGAACTTATGATCAAXXXXXXXXXX-ATGGGACGTTGCAAGAAAAATGTATTTAAAAAAAAAAATTCAAAAGAAAATTCATAATTCAAGTTACTGTAACGTTGAAAATTGTCCTCTTGTATGCAAT
TTTATTTATTAGCCTATATTATTTATCTAAAGCATAAATACAATATATTTATTTCTTTACAACTTTATATTCAACAATAAAATAGAGAACTTATGATCAAXXXXXXXXXXAATGGGACATTGCAAGAAAAATGTATTT-AAAAAAAAAATTCAAAAGAAAATTCATAATTCAAGTTACTGTAACGTTGAAAATTGTCCTCTTGTATGGAAT
* *
>Marker192574
GAGCATGCAAGATGTGCAATGATATTCATGATGTAGAGCCATCCTCCCAAAGCACCAAAATCATTCATATATGTATGTAAACCTCAAAATGCGGAGGGAGXXXXXXXXXXCACCATGAGAGAAATGTTCCTGAACATTTCAAGGATAAAGACCCATTCAAAACCTAAAATCATCAAATAACTCCTTCAAGTTCATCCATTAGTTAAGAAA
GAGCATGCAAGATGTGCAATGATATTCATGATGTAGAGCCATCCTCCCAAAGCACCAAAATCATTCATATATGTATGTAAACCTCAAAATGTGGAGGGAGXXXXXXXXXXCACCATGAGAGAAATGTTCCTGAACATTTCAAGGATAAAGACCCATTCAAAACCTAAAATCATCAAATAACTCCTTCAAGTTCATCCATTAGTTAAGAAA
*
>Marker436653
AATGGACCATAGTGTTTGTGATCGACATATTTGCTGGGAGGTTTATCTTAACCTTTTAGGAAGTGATTATGTGGTTTGATGTATTATAATTTATAGCTTTXXXXXXXXXXGATGTATTAATCCTATTAAAGAAATTGTTCAATGGGCACAGAACTTTGAGGCAAAGGTGCTTGTTGATGCTTGCCAGAGTGTCCCACACATGGCAGTTGA
AATGGACCATAGTGTTTGTGATCGACGTATTTGCTGGGAGGTTTATCTTAACCTTTTAGGAAGTGATTATGTGGTTTGATGTATTATAATTTATAGCTTTXXXXXXXXXXGATGTATTAATCCTATTAAAGAAATTGTTCAATGGGCACAGAACTTTGAGGCAAAGGTGCTTGTTGATGCTTGCCAGAGTGTCCCACACATGGCAGTTGA
*
>Marker78548
GAGGCAGAGACTTGGTTGATCAATCTCAATCGATGCTTTTCTATGCATCCTTATAGTAGCAATACTAGAGATCAATGTGCCATTATGCATATACATTGTGXXXXXXXXXXGTTTGAGCTGAAGACCTTAGAGATCGCTGTGGAGAAGGCAAGGTTGATAGAGGAGAACCTGGCTAGAGGCTTTGGTGGTCAGGAAAGTGTTCAAATTTAT
GAGGCAGAGACTTGGTTGATCAATCTCAATCGATGCTTTTCTATGCATCCTTATAGTAGCAATACTAGAGATCAATGTGCCATTATGCATTTACATTGTGXXXXXXXXXXGTTTGAGCTGAAGACCTTAGAGATCGCTGTGGAGAAGGCAAGGTTGATAGAGGAGAACCTGGCTAGAGGCTTTGGTGGTCAGGAAAGTGTTCAAATTTAT
*
>Marker137991
CTTCTCTATTAGCAAATCCTTAAAATAATAAATTTTCTTTTCTTTTAAATATTACATTCTAATATAGTCATATATACCTAAAAATAAAAAATTTAAAAACXXXXXXXXXXGCTAGGGTCACGTCCCATGACTAGTAAGAGTGACGCCTCATTTAAACACATACAAATACGAGAGGCAATTGACCCGGTTGAAAGCAAAAAAAGTAGAAAG
CTTCTCTATTAGCAAATCCTTAAAATAATAAATTTTCTTTTCTTTTAAATATTACATTCTAATATAGTCATATATACCTAAAAATAAAAAAATTTAAAACXXXXXXXXXXGCTAGGGTCATGTCCCATGACTAGTAAGAGTGACGCCTCATTTAAACACATACAAATACGAGAGGCAATTGACCCGGTTGAAAGCAAAAAAAGTAGAAAG
* * *
>Marker429965
TTGGGGCTTGTTATGCAAGGATTGAAGTTCAAGACTTCCTTGCACCTAAGTCAAGCCCTAAGGATAAGTTAGCAATAAAAGTAAAAGTGGCTATGGATTTXXXXXXXXXXTGATCACAACCACAATCTTGTCCATGGGATGGAATTGTCGGTGTAATCCATTCTAGGGTAGAGAAAGGTTTTTGAAGTGTAGAAGATGTGTTTTGAGTAG
TTGGGGCTTGTTATGCAAGGATTGAAGTTCAAGACTTCCTTGCACCTAAGTCAAGCCCTAAGAATAAGTTAGCAATAAAAGTAAAAGTGGCTATGGATTTXXXXXXXXXXTGATCACAACCACAATCTTGTCCATGGGATGGAATTGTCAGTGTAATCCATTCTAGGGTAGAGAAAGGTTTTTGAAGTGTAGAAGATGTGTTTTGAGTAG
* *
>Marker299164
AATGTTGTGAACATGTATTGGTGCATTTGTGTTAATTTATTAGGTTGGTATTTTACATGTATTGGTTC-TTTTTAAAATTTTAATTGGGGG-TCAAGTGCACXXXXXXXXXXAAGATAAAATGAGTGGAGTCCATGACAGATCCTTCCTGACACACTAAAACCATCAAAGCATGGCACGGATGTCTGTATCATGAGTAGCCACACATAACGA
AATGTTGTGAACATGTATTGGTGCATTTGTGTTAATTTATTAGGTTGGTATTTTACATGTATTGGTTCTTTTTTAAAATTTTAATTGGGGGTTCAAGTG--CXXXXXXXXXXAAGATAAAATGAGTGGAGTCCATGACAGATCCTTCCTGACACACTAAAACCATCAAAGCATGGCACGGATGTCTATATCATGAGTAGCCACACATAACGA
*
>Marker104361
CACAAGGGATCCATACTATGCGGACCCTGAACTAAATTTTTTTTCAAAAAATTACAAAAATTTCCTGTCATAGAAATATAGCAAATTTAGTGTCATTTTTXXXXXXXXXXATTGACCTATCTCCATTGTTCTTCTCAACCTCGCATAGGCATGCAAGATTTTGAAGGTTGATTATGGAGGAATGTTGGGTGATCATTCCTGCAGCATAAC
CACAAGGGATCCATACTATGCGGACCCTGAACTAAATTTTTTTTCAAAAAATTACAAAAATTTCCTGTCATAGAAATATAGCAAATTTAGTGTCATTTTTXXXXXXXXXXATTGACCTATCTCCATTGTTCTTCTCAACCTCGCATAGGCATGCAAGATTTTGAAGGTTGATTATGGAGGAATGTTGGGTGCTCATTCCTGCAGCATAAC
*
>Marker400838
CCTATTAATCAAGTTATTTATGCAAACTTGACGTGTCCCAAAGCAATATCCCATAGTCTTGGCTTATTCCTAAATAAGCATCTAAACAAGTTTTTGAGGCXXXXXXXXXXGCAACAACAAAGATAGAGTCATTACCTCTTTTAGTTCTTAGCAACCTAAGAATGAAATCCATACTAACATGATGCAGAGCTATAAGACCATCAGACCTGT
CCTATTAATCAAGTTATTTATGCAAACTTGACGTGTCCCAAAGCAATATCCCATAGTCTTGGCTTATTCCTAAATAAGCATCTAAACAAGTTTTTGAGGCXXXXXXXXXXGCAACAACAAAGATAGAGTCATTACCTCTTTTAGTTCTTAGCAACCTAAGAATGAAATCCATACTAACATGATGCAGAGCTATAAGACCATCAGACCTAT
*
>Marker511189
CTTTATAGGTAATCATTGAATTGATCTTTAGGCCAAATAGTCTCAATCTCTAATTTGGTTTTCTCATAGATTCTCTACTACTCTCATTTTACCAAATCTCXXXXXXXXXXAAGACTTTTTGCAAGACCTAGTCTACATAATGAAATTAGATAAAAATAGATTTTAGTGAACTATGCCAGACAATGCAGGGTCTATGGGGCAACAAAATTA
CTTTATAGGTAATCATTGAATTGATCTCTAGGCCAAATAGTCTCAATCTCTAATTTGGTTTTCTCATAGATTCTCTACTACTCTCATTTTACCAAATCTCXXXXXXXXXXAAGACTTTTTGCAAGACCTAGTCTACATAATGAAATTAGATAAAAATAGATTTTAGTGAACTATGCCAGACAATGCAGGGTCTATGGGGCAACAAAATTA
*
>Marker275347
AGGCCGCCAACTTCCGAAAGTCCAGCACAAATAAAAGCAGTAAGAGAAAATAATGAGCTTTCTCCTAGAAAAAGCTTCGAGGATCAGCAAATGGCCGGAAXXXXXXXXXXTTGTCAGACAGTG--GAGTTCTTGTGGGATTATAACTACATCCCCTTTATGGAATTTTGATGACGATGTCCAAAATAGTCATAGTTAACGTTCATGAAATTG
AGGCCGCCAACTTCCGAAAGTCCAGCACAAATAAAAGCAGTAAGAGAAAATAATGAGCTTTCTCCTAGAAAAAGCTTCGAGGATCAGCAAATGGCCGGAAXXXXXXXXXX--GTCAGACAGTGAAGAGTTCTTGTGGGATTATAACTACATCCCCTTTATGGAATTTTGATGACGATGTCCAAATTAGTCATAGTTAACGTTCATGAAATTG
*
>Marker400821
CAAAGTGAACTTAGCCCCTCCAACTCCTCCACCTGCCCACACAATTTTTTTTAGCTGTATTGACACACACAAGCACCCATAACTGAAACAAAACTCAAA-C---XXXXXXXXXXTATGGAAACAAAATATCGTTAATGGTATAGAAACAAAATAAACCGTTCTGAGAGAAGATATGGGTGCCAAGTGAGGCCCAAAATAAACTTGTAATGAGAA
CAAAGTG----TAGCCCCTCCAACTCCTCCACCTGCCCACACAATTTTTTTTAGCTGTATCGGCACACACAAGCACCCATAACTGAAACAAAACTCAAACCGAAXXXXXXXXXXTATGAAAACAAAATATCGTTAATGGTATAGAAACAAAATAAACCGTTCTGAAAGAAGATATGGGTGCCAAGTGAGGCCCAAAATAAACTTGTAATGAGAA
* * * *
>Marker117701
CCTCAACCTGTGGCTGCATCTCCTAAAAAGAA----TATGAAGAATGATAGGCAAAGTGAGCTCCGGTGGCCAGCAAAACACAACTAGCCATACACACTCGAACXXXXXXXXXXAGCACAACCACTTGTGCCAAGTCTTCCGCTGCTCCACTCTGATACACACATCACCAAGCCAAGAGTTGTGAAGCAACTCATCATGATCCATATGAAATAG
CCTCAACCTGTGGCTGCATCTCCTAAAAAGAATATATATGAAGAATGATAGGCAAAGTGAGCTCCGGTGGCCAGCAAAACACAACTAGCCATACACACT----CXXXXXXXXXXAGCACAACCACTTGTGCCAAGTCTTCCGCTGCTCCACTCTGATACACACATCACCAGGCCAAGAGTTGTGAAGCAACTCATCATGATCCATATGAAATAG
*
>Marker197415
TCAATTCTCACATAGGTGCAAACATAAAGCTTTGTCTCACTTGTGGGCCACTTTCAAATCACGAACTTGGAGGCCTTCAAAATTTTCCACCTCCATTAAAXXXXXXXXXXACAAACATAGCCCTTGGAGTAAGACTTCTAAAAGTATGGGTTTTATCATATTTTACTTAATTATTATATTCATTTTCTTTTTAATAATCAACATAGGTTT
TCAATTCTCACATAGGTGCAAACATAAAGCTTTGTCTCACTTGTGGGCCACTTTCAAATCACGAACTTGGAGGCCTTCAAAATTTTCCACCTCCATTAAAXXXXXXXXXXACAAACATAGCCCTTGGAGTAAGACTTCTAAAAGTATGGGTTTTATCATATTTTACTTAATTATTATATTCATTTTCTTTTTGCTAATCAACATAGGTTT
**
>Marker258700
ATAATCCCTTTTAACTTGTTTTAAAGTCTAAAAAATTGGCATTCAAGTCTAAACCCTAAAATGGATGATTATAAAGTTGTCAGGACAATCCAAATTACTTXXXXXXXXXXTCTAGCATCCAAGATAGTGGCCAAACTGATGAATATAACTAATATGGACCTAGGAGATGTCAAATTAGAGGAATTTGACAAATGTATGAATGAAGACAAT
ATAATCCCTTTTAACTTGTTTTAAAGTCTAAAAAATTGGCATTCAAGTCTAAACCCTAAAATGCATGATTATAAAGTTGTCAGGACAATCCAAATTACTTXXXXXXXXXXTCTAGCATCCAAGATAGTGGCCAAACTGATGAATATAACTAATATGGACCTAGGAGATGTCAAATTAGAGGAATTTGACAAATGTATGAATGAAGACAAT
*
>Marker223491
ATAAAAAATGTTGCTAAGAAAATCACTCATGATTTTCTCCTCTTCACTCTACAGATCAACAACTTGATCCACACTAGAACACCCAACTTTAATATTATTAXXXXXXXXXXATACATCTACGTGCTTCTATGCTCACAAGTCACACAGGCAAGGTTCTCATCTTGAAAGTCACTGGCTGCACCATCATTTATCTATGCAACTCTATCATCT
GTAAAAAATGTTGCTAAGAAAATCACTCATGATTTTCTCCTCTTCACTCTACAGATCAACAACTTGATCCACACTAGAACACCCAACTTTAATATTATTAXXXXXXXXXXATACATCTACGTGCTTCTATGCTCACAAGTCACACAGGCAAGGTTCTCATCTTGAAAGTCACTGGCTGCACCATCATTTATCTATGCAACTCTATCATCT
*
>Marker245894
TTGAATCAAGACATTTTTAACATACATGAGAGGAGATGCTCACTAACCCCATATCCACCAAGGCTTTTAATATCCTTTTCAAACACAAAATCTACAAGGAXXXXXXXXXXAACATTTGTAGTTTAATTTTTTATTTTTTGATCAAATTAAATTTGCATTCATTCAAATTATATAATAAAATTAAAAAAATTACTTATATAAATAATTAAG
TTGAATCAAGACATTTTTAACATACATGAGAGGAGATGCTCACTAACCCCATATCCACCAAGGCTTTTAATATCCTTTTCAAACATAAAATCTACAAGGAXXXXXXXXXXAACATTTGTAGTTTAATTTTTTATTTTTTGATCAAATTAAATTTGCATTCATTCAAATTATATAATAAAATTAAAAAAATTACTTATATAAATAATTAAG
TTGAATCAAGACATTTTTAACATACATGAGAGGAGATGCTCACTAACCCCATATCCACCAAGACTTTTAATATCCTCTTCAAACACAAAATCTACAAGGAXXXXXXXXXXAACATTTGTAGTTTAATTTTTTATTTTTTGATCAAATTAAATTTGCATTCATTCAAATTATATAATAAAATTAAAAAAATTACTTATATAAATAATTAAG
* * *
>Marker277216
TTGGATAGGGCAACTAGTGGAGGTGTCCCTAACTATTTCGCATCCCAAACTTCAAAAAATGGTCAGTTATTAATTTCTATCCTTCATCTTAGTCTGCAAGXXXXXXXXXXAGTTACTTGGATCTACTATCCAAATCCATCCTCACAAGAAAAAAACAATAATACAATATTATTTATGGGCTATAACCCAAAGGAAGCTCCAACTCTTTGA
TTGGATAGGGCAACTAGTGGAGGTGTCCCTAACTATTTCGCATCCCAAACTTCAAAAAATGGTCAGTTATTAATTTCTATCCTTCATCTTAGTTTGCAAGXXXXXXXXXXAGCTACTTGGATCTACTATCCAAATCCATCCTCACAAGAAAAAAACAATATTACAATATTATTTATGGGCTATAACCCAAAGGAAGCTCCAACTCTTTGA
* * *
>Marker225453
TTGATCCTATAGGTGATAGAGTCAAACTCGAGATTGATTATATATTCATCAAACACATTCCTAAATCTACTAGAAAGATTCATAATCAAGTCTACTTGAAXXXXXXXXXXTTTACAACACACGAAAACACCAAAAAGTTAGAGTATGACATTCAAATTAGGCACCCTAGACCTATCTTAAAATACAGGACACACAATGAAAATCTCTAGC
TTGATCCTATAGGTGATAGAGTCAAACTCGAGATTGATTATATATTCATCAAACACATTCCTAAATCTACTAGAATGATTCATAATCAAGTCTACTTGAAXXXXXXXXXXTTTACAACACACGAAAACACCAAAAAGTTAGAGTATGACATTCAAATTAGGCACCCTAGACCTATCTTAAAATACAGGACACACACTGAAAATCTCTAGC
* *
>Marker273591
TCTCCTTGTATATTGCATATACAAATGCAATATACATACAACCTCGGATCCCAACCGCCCATCAATCAGATTGGAAAAACCTATGAAATTTGGCTTGTATXXXXXXXXXXGAGGTTACTCTACACATCATATATCTCCAAATGATGTGTCTAAGTTTATATTTGCATGAGTTCTACCCTTATTTGTGATTTTCTACATGATATTTTCAAC
TCTCCTTGTATATTGCATATACAAATGCAATATACATACAACCTCGGATCCCAACCGCCCATCAATCAGATTGGAAAAACCTATGAAATTTGGCTTGTATXXXXXXXXXXGAGGTTACTCTACACATCATATATCTCCAAATGATGTGTCTAAGTTTATATTTGCATGAGTTCTACCCTTATTTGTGATTTTCTGCATGATATTTTCAAC
*
>Marker272411
TTTCCAATGTTAATACCTTCTTCTTTCTCTACTTGATTTCTCATTATTTCTTTGGCTGCTTCTTTAACCTCTTCCATGATATTCTTTGGCACCAAGTTCTXXXXXXXXXXCATTTATTCTTTGACCTTGATAAACCCTTGTATTTTCTTATGTTGGGTTTGTTCTGTAACTATGGGTGTCTCCAAAGGTGTTTGTTGAGATGTCTGCACA
TTTCCAATGTTAATACCTTCTTCTTTCTCTACTTGATTTCTCATTATTTCTTTGGCTACTTCTTTAACCTCTTCCATGATATTCTTTGGCACCAAGTTCTXXXXXXXXXXCATTTATTCTTTGACCTTGATAAACCCTTGTATTTTCTTATGTTGGGTTTGTTCTGTAACTATGGGTGTCTCCAAAGGTGTTTGTTGAGATGCCTGCACA
* *
>Marker125636
TAGATAATGACCAGATAATCAATACTATAACTATACTAGTAGAGAAAACTCAGGAAGAACCAAATTCAAAAGGAGGGTTGGAATTAAAGGACAATGAAGGXXXXXXXXXXGAACTATTGTCCTACATAAATGAGATGGAGGAAACTATCCAAAATGAAGTAGAGAGGCTTGCTACACTACCGCATACCCTTACTTGCACTGTAGCATGCT
TAGATAATGACCAGATAATCAATACTATAACTATACTAGTAGAGAAAACTCAGGAAGAACCAAATTCAAAAGGAGGGTTGGAATTAAAGGACAATGAAGGXXXXXXXXXXGAACTATTGTCCTACATAAATGAGATGGAGGAAACTATCCAAAATGAAGTAGAGAGGCTTGCTACACTACCACATTCCCTTACTTGCACTGTAGCATGCT
* *
>Marker244728
GCCCTAGATCCTAATACATCAATTTGCTACAGCAAAAGGCAGAATGATCTCTCTCTTTTACTTTGATTGGCAAAAAGGAGACAGTCATGAGTGTGAACCAXXXXXXXXXXTAAGTTTTATGGCTAAATTACATGCTGCTCTTACATAGCAAACATTTTAAGACTCACCCATATTGAAAAATAATGGAATTATAAGAAAAAATGTAGTTTT
GCTCTAGATCCTAATACATCAATTTGCTACAGCAAAAGGCAGAATGATCTCTCTCTTTTACTTTGATTGGCAAAAAGGAGACAGTCATGAGTGTGAACCAXXXXXXXXXXTAAGTTTTATGGCTAAATTACATGCTGCTCTTACATAGCAAACATTTAAAGACTCACCCATATTGAAAAATAATGGAATTATAAGAAAAAATGTAGTTTT
* *
>Marker321087
CTCTTGAGATTCAGTGAGAATAATCTATACTAGTAATGGCTTGCATTTACCATGCAAGGTCCATGCATGTTGTCCATCTTTTCTGTGATCTTATTGCTTAXXXXXXXXXXATATGCTTTTTATGTTTAGTCTCTGAATTATGTTATCCATGTTCTTAGAAACTCTATATTTGGGCATCATAACATTTTATATTTAACCAAAAATTATTCT
CTCTTGAGATTCAGTGAGAATAATCTATACTAGTAATGTCTTGCATTTACCATGCAAGGTCCATGCATGTTGTCCATCTTTTCTGTGATCTTATTGCTTAXXXXXXXXXXATATGCTTTTTATGTTTAGTCTCTGAATTATGTTATCCATGTTCTTAGAAACTCTATATTTGGGCATCATAACATTTTATATTTAACCAAAAATTATTCT
*
>Marker278215
ATAATCTCCCTAATTCCAGGATCAAAGGCCTTTGAGTCTCCCAACCCTAGATCCTAGGACATGGAGACATGCAAACATTTTCTTGAATTTTTCCCTTTGCXXXXXXXXXXTTACTATCTACCTCTTATAGCTATTCCCACTTACCATCTACATTTTGTTTCAATTCTATCCACCCACTTTCACACATATATGAAAGGTAAATAACTATAA
ATAATCTCCCTAATTCCAGGATCAAAGGCCTTTGAGTCTCCCAACCCTAGATCCTAGGACATGGAGACATGCAAACATTTTCTTGAATTTTTCCCTTTGCXXXXXXXXXXTTACTATCTACCTCTTATAGCTATTCCCACTTACCATCTACATTTTGTTTCAATTCTATCCACCCACTTTCACACACATATGAAAGGTAAATAACTATAA
*
>Marker63936
TATAGACTTGTGAGAGATAAGATCAAAGGTATAGAATGAATGAGAGGATCAATGGTAGAGAAGAGTTGAGAGGATGTGCACAAATAGGAAGAGAAAACGTXXXXXXXXXXTTGATTTATTTAAATTTGGAGAAGATATTATTAGAAGAAACAATTAAATAATTGGTTTTATTTAATTTAGAATGATTTTGGAAGAACTAATTAAATAATT
TATAGACTTGTGAGAGATAAGATCAAAGGTATAGAATGAATGAGAGGATCAATGGTAGAGAAGAGTTGAGAGGATGTGCACAAATAGGAAGAGAAAACGTXXXXXXXXXXTTGATTTATTTAAATTTGGAGAAGATATTATTGGAAGAAACAATTAAATAATTGGTTTTATTTAATTTAGAATGATTTTGGAAGAACTAATTAAATAATT
*
>Marker157951
AGGGAGCGCATGGGCCATATTACCATGAGATAGCGGTTCGAGCCTTTTAGCAATGTGAAGCAATTCCCTACCCCAAAATAATGGACTCAACCTTCAAAGCXXXXXXXXXXGGCTACCTGATTGCACAGGAAATTCTAATTTTTAAAATCTGGTCGTTAGATTTTTTTTTTTTCCATCATACACATTTCATTCAATGGATCATACCATAAC
AGGGAGCGCATGGGCCATATTACCATGAGGTAGTGGTTTGAGCCTTTTAGCAATGTGAAGCAATTCCCTACCCCAAAATAATGGACTCAACCTTCAAAGCXXXXXXXXXXGGCTACCTGATTGCACAGGAAATTCTAATTTTTAAAATTTGGTCGTTAGATTTTTTTTTTTTCCATCATACACATTTCATTCAATGGATCATACCATAAC
* * * *
>Marker57178
ACAATCTAGGGGACTATTTCAGACCATAAAGAGACCTCTTCAATCTGCAAACCCAATGTTCTTTCCCTTTTACCTCAAAACCTATAGGCTGTTGCATATAXXXXXXXXXXGGCCTTTCTTTCTTTGGGCAAACAAACAAGAACCTAGGTGTTACAAGAGTCTAAAGCCATCATCTTCTCCTACATGGCTAACTGCCAAGACTCACTATCA
ACATTCTAGGGGACTATTTCAGACCATAAAGAGACCTCTTCAATCTGCAAACCCAATGTTCTTTCCCTTTTACCTCAAAACCTATAGGCTGTTGCATATAXXXXXXXXXXGGCCTTTCTTCCTTTGGGCAAACAAACAAGAACCTAGGTGTTACAAGAGTCTAAAGCCATCATCTTCTCCTACATGGCTAACTGCCAAGACTCACTATCA
* *
>Marker370312
ATCATTGACTCTTCTACTTCTTCACCAAAACCTTTGATGGTGTTAACAAGTTCATCTACGCAAAGAAAATATGCGGCGACATTTTTTTCATCCTTCATCTXXXXXXXXXXATACCCATTTACTACGGATTGCAATATATTGAACCCTAGAGCCATTAAATAGGTTCTCATCCTTATGCTCCAAAAAGCATAGTTTGTTCCATTGAACAAT
ATCATTGACTCTTCTACTTCTTCACCAAAACCTTTGATGGTGTTAACAAGTTCATCTACGCAAAGAAAATATGTGGCGACATTTTTTTCATCCTTCATCTXXXXXXXXXXATACCCATTTACTACGGATTGCAATATATTGAACCCTAGAGCCATTAAATAGGTTCTCATCCTTATGCTCCAAAAAGCATAGTTTGTTCCATTGAACAAT
*
>Marker93096
CCACTATAAATGATGATAATACTATTGAAAATGAAACTACTAATGCTTGTAATCAACCATTTTCTGCAGGTAGTGATGATGAAGAAGATGACATTTCAGCXXXXXXXXXXAAAATTTAAATATGCTTTGGACCTTTTAGAAAAGTTTAACATGTTTGAATGCAAGCTAACATCTACCCCATTTTAATCTGGAGTCAAGCTTACTAAAGAA
CCACTATAAATGATGATAATACTATTGAAAATGAAACTACTAATGCTTGTAATCAACCATTTTCTGCAGGTAGTGATGATGAAGAAGATGACATTTCAGCXXXXXXXXXXAAAATTTAAATATGCTTTGGACCTTTTAGAAAAGTTTAACATGTTTGAATGCAAGCTAACATCTACCCCATTTCAATCTGGAGTCAAGCTTACTAAAGAA
*
>Marker553147
TAGGGATATGATATTATAATGTATTTAGGTGGATGGATATGCCCACATGTGGCACACATCTATTAAGTTAGTTATATTAGGTGTTTAGAGGTAAAAAGAGXXXXXXXXXXCTTTCAAGACAAGGTGAAGGAGAGAGAACATTAACTCATTGTTTTTTGAAGTTTAGAAAGTGGAAAAGTTAGGGACACCTGAACTAGTGCCCTAGTCCAA
TAGGGATATGATATTATAATGTATTTAGGTGGATGGATATGCCCACATGTGGCACACATCTATTAAGTTAGTTATATTAGGTGTTTAGAGGTAAAAAGAGXXXXXXXXXXCTTTCAAGACAAGGTGAAGGAGAGAGAACATTAACTCATTGTTTTTTGAAGTTTAGAAAGTGGAAAAGTTAGGGACAACTGAACTAGTGCCCTAGTCCAA
*
>Marker163608
CTTGAGGGTCAATAGCCCTAAGACTCCTTATGAGCTATGGTAAGGAAGACCTCCCACTGTTAGATACTCCAAGATCTTTGGCTGCAAATACTACATCACAXXXXXXXXXXGAGAAGCAATGAGAATCAGAGTAGATCCCTAAGACTCTAGCAAAGTATGTTCAAAGGAATCATTCAGAAGATAAGATCATTGGGGATAATAATGAAGGTG
CTTGAGGGTTAATAGCCCTAAGACTCCTTATGAGCTATGGTAAGGAAGACCTCCCACTGTTAGATACTCCAAGATCTTTGGCTGCAAATACTACATCACAXXXXXXXXXXGAGAAGCAATGAGAATCAGAGTAGATCCCTAAGACTCTAGCAAAGTATGTTCAAAGGAATCATTCAGAAGATAAGATCATTGGGGATAATAATGAAGGTG
*
>Marker144665
TAGAATCAACAAATTAACAAAAGAGATAATGAAAGTCACAAGTTCAGACCAAACTGGATAGGTCTGTGTGTAGTTAAGGAAGATGTTGAAAATAATGCCTXXXXXXXXXXTTTCCCCTCTACACTTTTAGCAAGTTCAAATGAAGTCATTCCTTTAGCTTTATATTGATCCTGCTCTTAATAAATCATGTTGTCAAGTCTAAGCATAGCA
TAGAATCAACAAATTAACAAAAGTGATAATGAAAGTCACAAGTTCAGACCAAACTGGATAGGTCTGTGTGTAGTTAAGGAAGATGTTGAAAATAATGCCTXXXXXXXXXXTTTCCCCTCTACACTTTTAGCAAGTTCAAATGAAGTCATTCCTTTAGCTTTATATTGATCCTGCTCTTAATAAATCATGTTGTCAAGTCTAAGCATAGCA
*
>Marker254862
CAAAATTGTGATGTTTTTGACACAAGACCCATTATTGAACAAATAATAAACATATTTATTTGATCTATGAACCATAACTAAAATTAAACACTTAAGAGAAXXXXXXXXXXAGTAGGCCACCCAACTCAAATCCATTTTGTGATCTATAGATTGTTCAAAACAAGACTCCTAATGGTGTCTGGAACACCCAAAATTTTGTAAATAT--AGGAG
CAAAATTGTGATGTTTTTGACACAAGACCCATTATTGAACAAATAATAAACATATTTATTTGATCTATGAACCATAACTAAAATTAAACACTTAAGAGAAXXXXXXXXXX--TAGGCCACCCAACTCAAATCCTTTTTGTGATCTATAGATTGTTCAAAACAAGACTCCTAATGGTGTCTGGAACACCCAAAATTTTGTAAATATAGAGGAG
*
>Marker233467
TTGATTTCAATGTCGGAGTTTGTATCTACTTCATCTTATCTTATGCTTTCATAGGTCCGGGAAGCTTTTGTTTTCTTCCTTTTTCTCACATTTTTTGGATXXXXXXXXXXTCTTCTATTGGTTTCAGGTTCTCTGAGCTCAGTATGTAACTTTAAACTCAACTCCTCATAAGTTCCAAATCTTTCAACCATTGTGTCTTTGGGCTTGCTT
TTGATTTCAATGTCAGAGTTTGTATCTACTTCATCTTATCTTATGCTTTCATAGGTCCAGGAAGCTTTTGTTTTCTTCCTTTTTCTCACATTTTTTGGATXXXXXXXXXXTCTTCTATTGGTTTCAGGTTCTCTGAGCTGAGTATGTAACTTTAAACTCAACTCCTCATAAGTTCCAAATCTTTCAACCATTGTGTCTTTGGGCTTGCTT
* * *
>Marker156623
GTCTACAAGTGCATTAAATTTCAAGAACATTGTTGTGTAGGTTTAATACATTGGGTTTGTTGATTTTTCATGGTGTTTTGTGCATGAAAACTAATTAAACXXXXXXXXXXTGAGTTCACCATAGAAAGTTAGGGTTTGGTAAGACTCTACAGGGTGTGTGGAAGGTAACAAGAATCCAAGGAAGCATGAAGAGTGCATTTTTCCATACTA
GTCTACAAGTGCATTAAATTTCAAGAACATTGTTGTGCAGGTTTAATACATTGGGTTTGTTGATTTTTCATGGTGTTTTGTGCATGAAAACTAATTAAACXXXXXXXXXXTGAGTTCACCATAGAAAGTTAGGGTTTGGTAAGACTCTACAGGGTGTGTGGAAGGTAACAAGAATCCAAGGAAGCATGAAGAGTGCATTTTTCCATACTA
*
>Marker459383
AAAAAGTTGAAGCACTCTCATTATTAATGATTTGTGGTGTAATATTTGTGATGGAGACACCCAACCTGCAACACCAATTGTTGTTAAAGAAAATTAAGTAXXXXXXXXXXAATGGTAGACTGCAAGTAGATCTGGATCAATGCCAACAATGACGGATAATGAAATGCAATCATTTGTCAGCTACATTATCCAATTGATGATTACAATGAA
AAAAAGTTGAAGCACTCTCATTATTAATGATTTGTGGTGTAATATTTGTGATGGAGACACCCAACCTGCAACACCAATCGTTGTTAAAGAAAATTAAGTAXXXXXXXXXXAATGGTAGACTGCAAGTAGATCTGGATCAATGCCAACAATGACGGATAATGAAATGCAATCATTTGTCAGCTACATTATCCAATTGATGATTACAATGAA
*
>Marker92564
GAGCACTATTTGAAGTGAAAATCTTGTGATATTAACTTCTCTCAGGCACAAAATTTTCATATATAACAATGATTGACAGCTGGCCCTAACCATATGGTTAXXXXXXXXXXGTGAACAGTCCAGACCGTGCAGCAAGAGTAAACACAACGGAAATAACTCAAAGATAGAATGCAAATGCAGATTCAGTCATTCAGTATATCATTGATTCAA
GAGCACTATTTGAAGTGAAAATCTTGTGATTTTAACTTCTCTCAGGCACAAAATTTTCATATATAACAATGATTGACAGCTGGCCCTAACCATATGGTTAXXXXXXXXXXGTGAACAGTCCAGACCGTGCAGCAAGAGTAAACACAACGGAAATAACTCAAAGATAGAATGCAAATGCAGATTCAGTCATTCAGTATATCATTGATTCAA
*
>Marker138315
TTACATACATCAACATAATCCAATTCTCAACTAGGTCGAGGACTTTTCCCCTAGTCAAAATAAAGGATTGATTTATTATGGATGAACATGTGGATTGAATXXXXXXXXXXTGACGTAGTTCGACAATGATACTAATGATAGGGATGAAGGATTGAATTGATAACCTGATGGGACAAGGCGATAAGGGCGAGCGAATAAAAAGCCATGATA
TTACATACATCAACATAATCCAATTCTCAACTAGGTCGAGGACTTTTCCCCTAGTCAAAATAAAGGATTGATTTATTATGGATGAACATGTGGATTGAACXXXXXXXXXXTGACGTAGTTCGACAATGATACTAATGATAGGGATGAAGGATTGAATTGATAACCTGATGGGACAAGGCGATAAGGGCGAGCGAATAAAAAGCCATGATA
*
>Marker209377
TCCTCATTTCCTAGGTCTATTCCCCATGGCGTTAGTCTTTCATGTGACATCAAGTGATCTATCTATGGAGGTTGCAAAAAGTTTCTCCTTGTGTAGTGGGXXXXXXXXXXGAGTTATGATGGCCCATGCTTTGGTTTCCTCCATGATGGCCACATGTGCTTTGCTATAGTTGTGTGTGTTTTGTGGTGAGGATTTTGTGCTTATGGTGGC
TCCTCATTTCCTAGGTCTATTCCCCATGGCGTTAGTCTTTCATGTGACATCAAGTGATCTATCTATGGAGGTTGCAAAAAGTTTCTCCTTGTGTAGTGGGXXXXXXXXXXGAGTTATGATGGCCCATGCTTCGGTTTCCTCCATGATGGCCACATGTGCTTTGCTATAGTTGTGTGTGTTTTGTGGTGAGGATTTTGTGCTTATGGTGGC
*
>Marker271149
ATAATACCAATTATTTTTTAAAAATAAATTAGATTTAAAAAACTTTTAACAAAATGTAAAAAATTGCAAATTTTTAATAATTTTTTTGAAATGCATGCAG--------XXXXXXXXXXGCCTTCAATGTCCAATTAGGACGAAATGAAAGGTTGATTTTACTTTTTTTGGCTACTCTAAACTTAATGGTGAACTCAAAATGTCTCCAAGAAGCTCCAA
#NAME?
* *
>Marker204976
AATCAAGACTGAGTATCTACTTGAGGAAGGAGATTTGCAAGTTATTGGAGAATATTGCAACGTGACTAACCCTAGAAACATTTAGAGAATTGAATTCAAGXXXXXXXXXXAAGAAGTTAGGGAGAGATTTGGAGAGAGAAGGAAGATGCTAGCTCCATAGAAATAATAGGGTATTTGGAAACTAATTGAATGGGTGGATGAATCAAATGA
AATCAAGACTGAGTATCTACTTGAGGAAGGAGATTTGCAAGTTATTGGAGAATATTGCAACGTGACTAACCCTAGAAACATTTAGAGAATTGAATTCAAGXXXXXXXXXXAAGAAGTTAGGGAGAGATTTGGAGAGAGAAGGAAGATGCTAGCTCCATAGAAATAATAGGGTATTTGGAAACTAATTGAATGGGTGGATGAATCAAATAA
*
>Marker354322
AAGGAGACTCGGGGCGCAATTTGACCCTAGCCAAATCCTCTGATGGTGGGCGCTTTAAACTTTACATTTCCAATCAATCCTTGAAAGCGCTCCACATCCTXXXXXXXXXXCATCTACAGGAATCCAAGGGAAAGCGCTCAAACCGACTAGGTTCTTCCAAAGGCGCTCCATCCCAGTCCAGTCCTTCTTGAAGGCGCTAAAGCATTCCAA
AAGGAGACTCGGGGCGCAATTTGACCCTAGCCAAATCCTCTGATGGTGGGCGCTTTAAACTTTACATTTCCAATCAATCCTTGAAAGCGCTCCACATCCTXXXXXXXXXXCATCTATAGGAATCCAAGGGAAAGCGCTCAAACCGACTAGGTTCTTCCAAAGGCGCTCCATCCCAGTCCAGTCCTTCTTGAAGGCGCTAAAGCATTCCAA
*
>Marker248084
CAATTTGATGATGGTTGATTGGAATGTCCTTTGGGTAGAGTTCTTAAACAAACTCTTTACCATTGATATGGAGGGCTAGGATTTAGAGATGCCCTGAAGGXXXXXXXXXXGGAGCACTGCACATGTGGAACTTGGTTTCTAGACCTTTACTAGGCTGATAGGGTTACAAAGTTCACTATTCATGACTTGTGCTAGAGGTTTCTAGAAGTT
CAATTTGATGATGGTTGATTGGAATGTCCTTTGGGTAGAGTTCTTAAACAAACTCTTTACCATTGATATGGAGGGCTAGGATTTAGAGATGACCTGAAGGXXXXXXXXXXGGAGCACTGCACATGTGGAACTTGGTTTCTAGACCTTTACTAGGCTGACAGGGTTACACAGTTCACTATTCATGACTTGTGCTAGAGGTTTCTAGAAGTT
* * *
>Marker341308
AACATTTTTGTTGAGTGTGAAGGTCTCATTTTTGGTTTGAGGTTAGCCTTGAGAAAGAAAGTCAAGATAATTTAAGTGTTTGGTAACTCTGAGTTAGTCAXXXXXXXXXXATATACTAGATTTTATGGCTGGCCCAAAGGTTTTTGAGGTGTATGTAATTGATAGGGATGAATTCTTATAGGCCCAATATGTTGAGATGGATAACGATTA
AACATTTTTGTTGAGTGTGAAGGTCTCATTTTTGGTTTGAGGTTAGCCTTGAGAAAGAAAGTCAAGATAATTTAAGTGTTTGGTAACTCTGAGTTAGTCAXXXXXXXXXXATTTACTAGATTTTATGGCTGGCCCAAAGGTTTTTGAGGTGTATGTAATTGATAGGGATGAATTCTTATAGGCCCAATATGTTGAGATGGATAACGATTA
AACATTTTTGTTGAGTGTGAAGGTCTCATTTTTGGTTTGAGGTTAGCCTTGAGAAAGAAAGTCAAGATAATTTAAGTGTTTGGTAACTCTGAGTTAGTCAXXXXXXXXXXATTTACTAGATTTTATGGCTAGCCCAAAGGTTTTTGAGGTGTATGTAATTGATAGGGATGAATTCTTATAGGCCCAATATGTTGAGATGGATAACGATTA
* *
>Marker293303
ACTTAAAAGGTATCTTTTGACAACTTAAAATAATTTTTTCAAGGCATTGACATGCAATTAAAGTGCCAAATAAAAAAATCACAACCCAAAGGGTCTTGCAXXXXXXXXXXTGTTATTTTGGGATTGTTGACTTACTACTTTTAGTAAATTGTTATTTTTAGATTTTTTTTGAAAAAGGGACATGACAAGTCCTCCACCCTCAAGATTGCT
ACTTAAAAGGCATCTTTTGACAACTTAAAATAATTTTTTCAAGGCATCGACATGCAATTAAAGTGCCAAATAAAAAAATCACAACCCAAAGGGTCTTGCAXXXXXXXXXXTGTTATTTTGGGATTGTTGACTTACTACTTTTAGTAAATTGTTATTTTTAGATTTTTTTTGAAAAAGGGACATGACAAGTCCTCCACCCTCAAGATTGCT
ACTTAAAAGGCATCTTTTGACAACTTAAAATAATTTTTTCAAGGCATTGACATGCAATTAAAGTGCCAAATAAAAAAATCACAACCCAAAGGGTCTTGCAXXXXXXXXXXTGTTATTTTGGGATTGTTGACTTACTACTTTTAGTAAATTGTTATTTTTAGATTTTTTTTGAAAAAGGGACATGACAAGTCCTCCACCCTCAAGATTGCT
* *
>Marker261603
GATCATACATAATTGTGGATTTCTTGGTGAAGTATGGTTTGGTTTTTTCTTTATTTCATGACTGTGTTAGAATATACATGTGGACCATTGGTAAAACTT-AXXXXXXXXXXAGATAGTTTCAGAAGAACTAATCAACATTGTGTTTAATTCATGCTTATATGTTTAAATATTGTAAGATTTGGTGTAATTGTTAAGAATATATGCAAATCA
GATCAT-CATAATTGTGGATTTCTTGGTGAAGTATGGTTTGGTTTTTTCTTTATTTCATGACTATGTTAGAATATACATGTGGACCATTGGTAAAACTTAAXXXXXXXXXXAGATAGTTTCAGAAGAACTAATCAACGTTTTGTTTAATTCATGCTTATATGTTTAAATATTGTAAGATTTGGTGTAATTGTTAAGAATATATGCAAATCA
* * *
>Marker342462
TTTGATGTTGAAATCATATTTGATGATTTGTAATGTTATGACATCATCTTCTTTAACAATAAGGAACTAACCACTTCTTCAAGTTTCAAGTTGGAACTAAXXXXXXXXXXCAAGATCCCTAACTTTGTTTAGAATTTCTTGGTGGTAGTTTCTCCCCATACATTTAGAAGCACTAACTTTAAAAGGAAACAATAAATTAATTCTAGCCTT
TTTGATGTTGAAATCATATTTGATGATTTGTAATGTTATGACATCATCTTCTTTAACAATAAGGAACTAACCACTTCTTCAAGTTTCAAGTTGGAACTAAXXXXXXXXXXCAAGATCCCTAACTTTGTTTAGAGGTTCTTGGTGGTAGTTTCTCCCCATACATTTAGAAGCACTAACTTTAAAAGGAAACAATAAATTAATTCTAGCCTT
**
>Marker116045
ATCACCATTGTCTCCAACATTTCCATTTCTAGACTGCAAAAAATAGTGAGTTAAGGTTCTTTGCCCTTTGTCTAATTCCAGTAACATTTGTCGTAATTTGXXXXXXXXXXGATGTATAGGGAAGAGTCCTTGATGGTATCCTCTCTAGAGATATCTGCGGGAAAAGCTTTTGCTACCTTGTTGAGAATAAACTCAATGTTCAAGGCTCGT
ATCACCATTGTCTCCAACATTTCCATTTCTAGACTGCAAAAAATAGTGAGTTAAGGTTCTCTGCCCTTTGTCTAATTCCAGTAACATTTGTCGTAATTTGXXXXXXXXXXGATGTATAGGGAAGAGTCCTTGATGGTATCCTCTCTAGAGATATCTGCAGGAAAAGCTTTTGCTACCTTGTTGAGAATAAACTCAATGTTCAAGGCTCGT
* *
>Marker307379
AGACCTAAAACATTAGTGTGCGTAGACATGTTTTCTAATCACTTAGAACTTAGTGCAAGTTTGATACCTAAAGAACTTAAGACTACAATACTTGATCAGGXXXXXXXXXXTTATTTTTTAGTTTGATAAATCAACCCCTAAGACTAATAGTGTTGATAGACTACATGCAAATGTTCAATTTGAGGAAAATGAACACGACTCTTTGTCTGG
AGACCTAAAACATTAGTGTGCGTAGACATGTTTTCTAATCACTTAGAACTTAGTGCAAGTTTGATACCTAAAGAACTTAAGACTACAATACTTGATCAGGXXXXXXXXXXTTATTTTTTAGTTTGATAAATCAACCCCTAAGACTAATAGTGTTGATAGACTACATGCAAATGTTCAATTTGAGGAAAATGAACATGACTCTTTGTCTGG
*
>Marker402615
TCCAAAAGGTATGCTTCTGTTGAAGGTCCTCTGTTTGAATAATTTTATGGATACATTTCTATCATTTGATCATAAATATTCATGCAATCATGTAGGTGTTXXXXXXXXXXGGAACATAAAGAATCATGTGTGGTGTGTGAGTAGTCACATGTAGAACATGAGGAGTTGTGTGTGGGGCATGAAGAGTCACATGTAGTGCATGAGGAGACA
TCCAAAAGGTATGCTTCTGTTGAAGGTCCTCTGTTTGAATAATTTTATGGATACATTTCTATCATTTGATCATAAATATTCATGCAATCATGTAGGTGTTXXXXXXXXXXGGAACATAAAGAATCATGTGTGGTGTGTGAGTAGTCACATGTAGAACATGAAGAGTTGTGTGTGGGGCATGAAGAGTCACATGTAGTGCATGAGGAGACA
*
>Marker248463
TCCCTTATGAGTGATTTACAAACAATATTAAGAATAATAATTACAAGGATTTACAAGGTTAATGGCATCTTAATCCTAACACTTGCAATAAATGTGGTTAXXXXXXXXXXATGAGGAAGAGTGGATTTTATTTTATCCTTGGAGATGTGGTTTGGGAGGAAAGGGTGAGTTGGCATGTGATGGGGGATTTAGGAGGGGAGGGATATTGGT
TCCCTTATGAGTGATTTACAAACAATATTAAGAATAATAATTACAAGGATTTACAAGGTTAATGGCATCTTAATCCTAACACTTGCAATAAATGTGGTTAXXXXXXXXXXATGAGGAAGAGTGGATTTTATTTTGTCCTTGGAGATGTGGTTTGGGAGGAAAGGGTGAGTTGGCATGTGATGGGGGATTTAGGAGGGGAGGGATATTGGT
*
>Marker115045
GGAACTGCCCCCAGATCCCTCTGAATCCTTTGGTGGCATTTCTCATACCCTCTTTGCAAGAATTTGCTCCATTTCTTTAAAGGACCATGGACTCATAGAGXXXXXXXXXXTCTCGTGGCCTGTGCCTTCCTGGCACCTACTCATTGCAAGTGTCATGTCAAACGCGTCACAGATGTAGGTATTTTGATTTTGTTCTTTATGACAACTCAG
GGAGCTGCCCCCAGATCCCTCTGAATCCTTTGGTGGCATTTCGCATACCCTCTTTGCAAGAATTTGCTCCATTTCTTTAAAGGACCATGGACTCATAGTGXXXXXXXXXXTCTCGTGGCCTGTGCCTTCCTGGCACCTACTCATTGCAAGTGTCATGTCAAACGCGTCACAGATGTAGGTATTTTGATTTTGTTCTTTATGACAACTCAG
* * *
>Marker197773
TTAAATCGGGCCTTGTAGTAGTCAAATACATCAAGCTTCCAACCATGCTTTTGTATAGGGTTGGGTTTACTTCATTGTTGTTGTTGTCCCCCTTGCTTAAXXXXXXXXXXACAATAATCAAAATCTCACCATGAGCTGCTTTGATAAAGAGTGTGGGCTCACTGTTGCTTTTGCTAAAGCCATTTCTCAGTAGATATGAATCTATTTTGT
TTAAATCGGGCCTTGTAGTAGTCAAATACATCAAGCTTCCAACCATGCTTTTGTATAGGGTTGGGTTTACTTCATTGTTGTTGTTGTCCCCCTTGCTTAAXXXXXXXXXXACAATAATCAAAATCTCACCATGAGCTGTTTTGATAAAGAGTGTGGGCTCACTGTTGCTTTTGCTAAAGCCATTTCTCAGTAGATATGAATCTATTTTGT
*
>Marker302131
AAGTTAACCTTTTGTTATGAAGTGTTTTGTTCTTTATGGGTATCTCTTGATCCTTGTAAAGATGACAGAGGAGGGACCTCAACAAAGACTCCCTTACCTCXXXXXXXXXXTTTTAGACATTTGTGAATTGTTGAGGGGATAGTTTTCATGGCCTCAATCCATGAATGGCCTAGTTTTATGTTGGTATGCGGTGACTAATCACGTAAATAA
AAGTTAACCTTTTGTTATGAAGTGTTTTGTTCTTTATGGGTATCTCTTGATCCTTGTAAAGATGACAGAGGAGGGACCTCAACAAAGACTCCCCTACCTCXXXXXXXXXXTTTTAGACATTTGTGAATTGTTGAGGGGATAGTTTTCATGGCCTCAATCCATGAATGGCCTAGTTTTATGTTGGTATGCGGTGACTAATCACGTAAATAA
*
>Marker417267
TAAGAATGGTAGTGCCAATGGTCCTTGGACAAGAAAATATTAGTGCTAACTAAGAATTTTGGAGGGATACAACTTCAACTGCCACAAATCCATTTTTCTCXXXXXXXXXXTTATTAGTTAGTTGTTTTATTTTCTATCATCTTTGCAAGTAGAGATAAATGTTCATTTTAGTTTTTTATCTTTCTAGTGGAATGAGAATTAGTAGACTTG
TAAGAATGGTAGTGCCAATGGTCCTTGGACAAGAAAATATTAGTGCTAACTAAGAATTTTGGAGGGATACAACCTCAACTGCCACAAATCCATTTTTCTCXXXXXXXXXXTTATTAGTTAGTTGTTTTATTTTCTATCATCTTTGCAAGTAGAGATAAATGTTCATTTTAGTTTTTTATCTTTCTAGTGGAATGAGAATTAGTAGACTTG
*
>Marker129828
TGAGTTACTCTGCTCATGAAGCTGACCTGAAGAAGTTTACTTGGTGCAGAGCATTCCAAATGTTGGAAGGTTATCTAAGGAGGTTCTATAGGTCATCCTGXXXXXXXXXXTAAATGAAGCAGATATATAAACAGAGA-TTTTTTATGCCGAATGAATACATGAATGATATGATGTGATGTTGTGCGAAGGAATGATGTATGTGATGCGATA
TGAGTTACTCTGCTCATGAAGCTGACCTGAAGAAGTTTACTTGGTGCAGAGCATTCCAAATGTTGGAAGGTTATCTAAGGAGGTTCTATAGGTCATCCTGXXXXXXXXXX-AAATGAAGCAGATATATAAACAGAGATTTTTTTATGCCGGATGAATACATGAATGATATGATGTGATGTTGTGCGAAGGAATGATGTATGTGATGCGATA
*
>Marker197897
TACAACTACCACATCTGACAAAAATTCCCCTTCCATTATGTTTTGATAGATGTCCATACCTGGCTCGAAAGCACCCATTTTGGCACAGGTAGGGAGGATGXXXXXXXXXXCCAAATCCTCATCCAAAGCTTCAATTTGTGCATGGGCATGGAGGATGCTGGCGAAGGTTGAGGAGTTGGGCTTTACACTTGCCAGTTGGAAATCTGACAC
TACAACTACCACATCTGACAAAAATTCCCCTTCCATTATGTTTTGATAGATGTCCATACCTGGCTCGAAAGCACCCATTTTGGCACAGGTAGGGAGGATGXXXXXXXXXXCCAAATCCTCATCCAAAGCTTCAATTTGTGCATGGGAATGGAGGATGCTGGCGAAGGTTGAGGAGTTGGGCTTTACACTTGCCAGTTGGAAATCTGACAC
*
>Marker189576
TTTCAGAATTGGCACAAAATGATTATGTATGCGGTTGACAATTTGGGTTATGATGTTTGATCCATGATTATAGGTGGTGGTGTGGTTCAGTTTAGGAGATXXXXXXXXXXTGTGATTGATTTAGTGTTGATGCAGACTTTGTTAGTTGGCCTTGTCTATGGTCATTTATGCATTGGTATGTTGCATTGGGATGAGAGGATGGATGATCAA
TTTGAGAATTGGCACAAAATGATTATGTATGCGGTTGACAATTTGGGTTATGATGTTTGATCCATGATTATAGGTGGTGGTGTGGTTCAGTTTAGGAGATXXXXXXXXXXTGTGATTGATTTAGTGTTGATGTAGACTTTGTTAGTTGGCCTTGTCTATGGTCATTTATGCATTGGTATGTTGCATTGGGATGAGAGGATGGATGATCAA
* *
>Marker651569
TAAATTCTTATATGATCAGGCATTTAAAGCAAAAATTCTAAAAGTGCCTAGGAGTCATGGAGATGTGTCTCAGGCGTCCCCTAAACACACCAGACACATCXXXXXXXXXXACGTGTTATCAGTTTTATGCTGTAATAGATACAAATTTTCAGTTGATATTTCAGCCACAGTTTTACAACCTTCAGAGAACTCGCCAAACTTGAGATGATG
TAAATTCTTATATGATCAGGCATTTAAAGCAAAAATTCTAAAAGTGCCTAGGGGTCATGGAGATGTGTCTCAGGCGTCCCCTAAACACACCAGACACATCXXXXXXXXXXACGTGTTATCAGTTTTATGCTGTAATAGATACAAATTTTCAGTTGATATTTCAGCCACAGTTTTACAACCTTCAGAGAACTCGCCAAACTTGAGATGATG
*
>Marker228047
TAAATTTTTCCAGAAATAAAAAATAGTTTATGTAAACAAAAATACTTAAATCTTTCAATAAGCTACAAAATGACACATAACAAACCCTTCAAGTATCATGXXXXXXXXXXCTCCTCTAGGTTCCAAAAAGAATTTTCCAAAGTTCCATGGTGATGGCTCTTAGCACTCAGACAAACACATCTCAGCTTTCACCACAGCTTGCAGCATGTT
TAAATTTTTCCAGAAATAAAAAATAGTTTATGTAAACAAAAATACTTAAATCTTTCAATAAGCTACAAAATGACACATAACAAACCCTTCAAGTATCATGXXXXXXXXXXCTCCTCTAGGTTCCAAAAAGAATTTTCCAAAGTTCCATGGTGATGGCTCTTAGCACTCAGACAAACACATTTCAGCCTTCACCACAGCTTGCAGCATGTT
* *
>Marker81013
AATTGTAGGAAGTGATCAAAATCAACATATCTTTTCTATAAACAATGAGATATAGCAAAAGGATCGGGATTTGTGATTCACAATTTGCACATCATCACAA-XXXXXXXXXXTTTGGTGGACTGTTCTACTCTCCTTGCCTGCTTCCTTGTGTCTTGCAGTGTCCCCTGCTACCTTGTTGTGACTTCCTGTCACTCGCCCTTGCTTCTTGTT
AATTGTAGGAAGTGATCAAAATCAACATATATTTTCTATAAACAATGAGATATAGCAAAAGGATCAGGATTTGTGATTCACAATTTGCACATCATCACAA-XXXXXXXXXXTTTGGTGGACTGTTCTACTCTCCTTGCCTGCTTCCTTGTGTCTTGCAGTGTCCCCTGCTACCTTGTTGTGACTTCCTGTCACTCGCCCTTGCTTCTTGTT
AATTGTAGGAAGTGATC-AAATCAACATATCTTTTCTATAAACAATGAGATATAGCAAAAGGATCGGGATTTGTGATTCACAATTTGCACATCATCACAATXXXXXXXXXXTTTGGTGGACTGTTCTACTCTCCTTGCCTGCTTCCTTGTGTCTTGCAGTGTTCCCTGCTACCTTGTTATGACTTCCTGTCACTCACCCTTGCTTCTTGTT
* * * * *
>Marker454582
AGGAGAGAGAATACAACATAACTTGACCTCAAACACGACATACAATGTTCATTAACCTTATAAAATGAAATGTTCCTAAGTGCAAAATAGATGGATCCTTXXXXXXXXXXATAGTGCAAATCCACTAAACCATAAATGCATTGAAACATAGTGTGTATCCACTGAAATAGAGATAGAGGAAAAGTATACCAGACAGGACCATTGAAATAG
AGGAGAGAGAATACAACATAACTTGACCTCAAACATGACATACAATGTTCATTAACCTTATAAAATGAAATGTTCCTAAGTGCAAAATAGATAGATCCTTXXXXXXXXXXATAGTGCAAATCCACTAAACCATAAATGCATTGAAACATAGTGTGTATCCACTGAAATAGAGATAGAGGAAAAGTATACCAGACAGGACCATTGAAATAG
* *
>Marker417226
ACAACAACTGTCTTTCTAACAAAACCCTCAAGTGGACATTATTCCTCACAAAGGACAATCCACAAGATTCTTGGAGCTAGTTACTACTATCCATCTTCTCXXXXXXXXXXCTTTATAATAAAATCTTCTTAACGTTTGGAGCCCCAAGATCAATAGTTTCAAATAGAGGGCCCCAATTCACTTCTCAGGTAATTCAAGCCTTCACAGATC
ACAACAACTGTCTTTCTAACAAAACCCTCAAGTGGACATTATTCCTCACAAAGGACAATCCACAAGATTCTTGGAGCTAGTTACTACTATCCATCTTCTCXXXXXXXXXXCTTTATAATAAAATATTCTTAACGTTTGGAGCCCCAAGATCAATAGTTTCAAATAGAGGGCCCCAATTCACTTCTCAGGTAATTCAAGCCTTCACAGATC
*
>Marker533368
CCAGCCCAAACCCACCTTCAAAAAGAAGATACTCACTGGAAAAATTGTTTGTAGCTGCTTTGATTTCTGAATAATCAAATGGTTTGGGCTTTCCTCCAAAXXXXXXXXXXAATACACAAAACATACAATATGCATGGTTTAAAGCAACATACTTTGATCATCTTTCGCTGTATTAATGCACACAGAGAGGAAATCATGTTGAGAGTTGAG
CCAGCCCAAACCCACCTTCAAAAAGAAGATACTCACTGGAAAAATTGTTTGTAGCTGCTTTGATTTCTGAATAATCAAATGGTTTGGGCTTTCCTCCAAAXXXXXXXXXXAATACACAAAACATACAATATGCATGGTTTAAAGCAACATACTTTGATCATCTTTCGCTGTATTAATGCACAGAGAGAGGAAATCATGTTGAGAGTTGAG
*
>Marker165007
GAATCATGGATATCGGGCCCCATCGTGGCAAAGAAGTGCCAATGCTATTCAGGGACCAGGAAGCCACAATTACAATGGACTCTTCTGACGAGGACGAGGTXXXXXXXXXXGACACCCAAGGAATCAAAAGAAGGAAGGAAACAATGTTGGAAAACTAGGAAAATTGATAGATACACGTGTAACATCAGAAATTGTCCTCCTGCATGGTAT
GAATCATGGATATCGGGCCCCATCGTGGCAAAGAAGTGCCAATGCTATTCAGGGACCAGGAAGCCACAATTACAATGGACTCTTCTGATGAGGACAAGGTXXXXXXXXXXGACACCCAAGGAATCAGAAGAAGGAAGGAAACAATGTTGGAAAACTAGGAAAATTGATAGATACACGTGTAACATCAGAAATTGTCCTCCTGCATGGTAT
* * *
>Marker474346
TAGAACTCTGTAAAGTTAGAGAACATGTTTGTGAGTTATATACATGTAATTGGCATGCTTGGAAGGCATCTAGAGTTGGGTTTTCAGTAGTTATAACTTAXXXXXXXXXXGTGATTTCTGTTATCTATCTCCATGTTTCACATTATATATTCATTTCCTTCATTAAAATCTGCAAAATGCACAATTCTATGAATGCATGTGCATAAGCAA
TAGAACTCTGTAAAGTTAGAGAACATGTTTGTGAGTTATATACATGTAATTGGCATGCTTGGAAGGCATCTAGAGTTGGGTTTTCAGTAGTTATAACTTAXXXXXXXXXXGTGATTTCTGTTATCTATCTCCATGTTTCACATTATATATTCATTTCCTTCATTAAAATCTGCAAAATACACAATTCTATGAATGCATGTGCATAAGCAA
*
>Marker406572
CTCTTTAATGGTGGGGTTTTTTTCCTGAAAGGGTTTCTCCACATACATCCAATGTCATGTGTTCAAATCTTATGGTTTTCTAATTTATTCTTCCACACATXXXXXXXXXXTGTCTTAACAAAAACATCAATGACTTGATTTGTGTTTAATGGAGTAGTAGTGTCTAGATCTAGTTAGATCCATTATGAATATGTTCAACAACATCTAATG
CTCTTTAATGGTGGGGTTTTTTTCCTGAAAGGGTTTCTCCACATACATCCAATGTCATGTGTTCAAATCTGATGGTTTTCTAATTTATTCTTCCACACATXXXXXXXXXXTGTCTTAACAAAAACATCAATGACTTGATTTGTGTTTAATGGAGTAGTAGTGTCTAGATCTAGTTAGATCCATTATGAATATGTTCAACAACATCTAATG
*
>Marker454167
TGCTTTCACATAATCCTTTCATCCATCATCCATTTATCCATCCATCTCCATCCATAATCCACATCATAACCCACTATCCTCCATCCATCCATAATCCACAXXXXXXXXXXAGAAAAAA-AATAAAAAAAACAATAAAAAAGAAAAAAACAAAATAGTAAAGAGAAATCATTCGTCCAATGGTGAAAACCACTCCTTGTGGTGCCTTGGATA
TGCTTTCACATAATCCTTTCATCCATCATCCATTTATCCATCCATCTCCATCCATAATCCACATCATAACCCACTATCCTCCATCCATCCATAATCCACAXXXXXXXXXXATAAAAAACAAT-AAAAAAACAATAAAAAAGAAAAAAACAAAATAATAAAGAGAAATCATTCGTCTAATGGTGAAAACCACTCCTTGTGGTGCCTTGGATA
* * *
>Marker39706
ATCTTTTGCAGATTAATACAAACATTGGGCCTCTTTCCTGTGTGGAGTTTTTTACCCTCAAGGGTTTTCTCCATGTTAAACATTGTTTCATTGTGTCTTGXXXXXXXXXXCCTCCCACTTATATTGCTGATCCATGCAATACATTCAAAACAAATCCTCTAGAACTTGGTTAACTCTCTCAATTTGACCATCTGTTTCATGATGATAAGC
ATCTTTTGCAGATTAATACAAACATTGGGCCTCTTTCCTGTGTGGAGTTTTTTACCCTCAAGAGTTTTCTCCATGTTAAACATTGTTTCATTGTGTCTTGXXXXXXXXXXCCTCCGACTTATATTGCTGATCCATGCAATACATTCATAACAAATCCTCTAGAACTTGGTTAACTCTCTCAATTTGACCATCTGTTTCAGGATGATAAGT
* * * * *
>Marker355286
CACCTAGAATTAGCAATTGTCAATACAATGCTACAAACACAAGGTCTGTAATATCCCCAATGGGATCTGCCCTAAATTCTGATTTTTATTTTCTGATTTCXXXXXXXXXXCAGAATATCTGAATATGCAATTACATCAATAACATAGGCTCAAACATGCCCAAATGTATCTCAGAAATCTGCCCTTACAGTTCAGACCTAAAATTAGGTT
CACCTAGAATTAGCAATTGTCAATACAATGCTACAAACACAAGATCTGTAATATCCCCAATGGGATCTGCCCTAAATTCTGATTTTTATTTTCTGATTTCXXXXXXXXXXCAGAATATCTGAATATGCAATTACATCAATAACATAGGCTCAAACATGCCCAAATGTATCTCAGAAATCTGCCCTTACAGTTCAGACCTAAAATTAGGTT
*
>Marker449781
TGATTGAGAATTTGAGACAAGTTGAGAATTTGACAGTCAAGGCTCAAGACAAAGTTTACACCCTGTAATTGGCAACATTAAACAATTTCTATTTTATGTCXXXXXXXXXXACTGCCAAAACATATGCCATAATTTATAACCCACAGGAATGTTATTTTTAACCTTCACCTTATCCACAGCGGGGATGTAACAGAGTGAGTAAATAGTGTT
TGATTGAGAATTTGAGACAAGTTGAGAATTTGACAGTCAAGGCTCAAGACAAAGTTTACACTCTGTAATTGGCAACATTAAACAATTTCTATTTTATGTCXXXXXXXXXXACTGCCAAAACATATGCCATAATTTATAACCCACAGGAATGTTATTTTTAACCTTCACCTTATCCACAGCGGGGATGTAACAGAGTGAGTAAATAGTGTT
*
>Marker591050
AAACACCAAAGATTAAAAGTATAAACAACAAATCCAAACCAACAAAGAGAGAAAGTCACTGAAGAGGATTTAAGAACCCCTTATTATCATCCTGTCCACTXXXXXXXXXXTGAGAAGGATTAGAGAAGTATCTGATTACAAAATGATTTAAAGGGGATGTATGACTTGTCTTCAAAACAAATGAATATATAAAAACCATAAGAAAGGAGA
AAACACCAAAGATTAAAAGTATAAACAACAAATCCAAACCAACAAAGAGAGAAAGTCACTGAAGAGGATTTAAGAACCCCTTATTATCATCCTGTCCACTXXXXXXXXXXTGAGAAGGATTACAGAAGTATCTGATTACAAAATGATTTAAAGGGGATGTATGACTTGTCTTCAAAACAAATGAATATATAAAAACCATAAAAAAGGAGA
* *
>Marker509207
TCTAGGTATCCTTTAGAACATTAGTATGGTCATAGCCATCCTTGCATGTATTCCAATTATGCTAGATGTGCACCTACATTGTCATATTCACTCTAGTAACXXXXXXXXXXAGATTAATAGCACATCAAAGTTGTAACATTTTCAATGTATACTAATTATTCTTTTATAGCAAGTGTAATCAATTAAAGATGTTATGATGTTGACAAGTAA
TCTAGGTATCCTTTAGAACATTAGTATGCTCATAGCCATCCTTGCATGTATTCCAATTATGCTAGATGTGCACCTACATTGTCATATTCACTCTAGTAACXXXXXXXXXXAGATTAATAGCACATCAAAGTTGTAACATTTTCAATGTATACTAATTATTCTTTTATAGCAAGTGTAATCAATTAAAGATGTTATGATGTTGACAAGTAA
*
>Marker91468
AGAGAAAAAGTAATAGCATATTTCCCATTAGTCATGGAATCAACTTCCTTCTTAACTATATGTAGATTTTACAATAATGCATAAAGGGTTGGGAAACAAGXXXXXXXXXXATGGGAAGTGAGCACTAGGAGGGGATCTACCTTGAGATGAGAAGAGGAAGGATCTATGGAAGAGGAAGGGTCGGTGGGTAAAGGGGAAGATGTCAAAGGG
AGAGAAAAAGTAATAGCATATTTCCCATTAGTCATGGAATCAACTTCCTTCTTAACTATATGTAGATTTTACAATAATGCATAAAGGGTTGGGAAGCAAGXXXXXXXXXXATGGGAAGTGAGCACTAGGAGGGGATCTACCTTGAGATGAGAAGAGGAAGGATCTATGGAAGAGGAAGGGTCGGTGGGTAAAGGGGAAGATGTCAAAGGG
*
>Marker321692
ATCTGTGTTATTATATTGTTTTTTTTGTGTTCGACAAAGCAATGCTGGCACCATTGATCTACAAAAAAGTATTAAGGTATTCTTATTATACAAACACAAAXXXXXXXXXXTCTCTCTGACATCCATTTTCCATTCTCAATTATTTATCTTTGTTGGTCACAATTTTCTCAAAATTAAGATAATATATTGAGGAACATTTTATTTTATTGT
ATCTGTGTTATTATATTGTTTTTTTTGTGTTCGACAAAGCAATGCTGGCACCATTGATCTACAAAAAAGTATTAAGGTATTCTTATTATACAAACACAAAXXXXXXXXXXTCTCTCTGACATCCACTTTCCATTCTCAATTATTTATCTTTGTTGGTCACAATTTTCTCAAAATTAAGATAATATATTGAGGAACATTTTATTTTATTGT
*
>Marker541059
ACCGATGTCCCAAAAATGAATGGGATTTATAAAGAGAAATTGGGGACAAAATATTTTTATCCCCAATCACACTAATTTCATTTGATTTACATACTAAGGAXXXXXXXXXXCATTCCAAGTCCACAACATCCCTACATGATGCAATTGGATGTTTAAACCTTCCTAGCAACTCAATCCAACACTCACCTTTCACCAAAATCAGGGTTTGAT
ACTGATGTCCCAAAAATGAATGGGATTTATAAAGAGAAATTGGGGACAAAATATTTTTATCCCCAATCACACTAATTTCATTTGATTTACATACTAAGGAXXXXXXXXXXCATTCCAAGTCCACAACATCCCTACATGATGCAATTGAATGTTTAAACCTTCCTAGCAACTCAATCCAACACTCACCTTTCACCAAAATCAGGGTTTGAT
* *
>Marker428139
GAGAAGACATTATATGAAGATATTATGGCCATATAAAGTTCAACATGCTATGAAAGAGTCATGAGTGTGATTATACATATAAATTAGCCAATAGGCCAATXXXXXXXXXX----ATAAGAACCCCTACAACATAATCAACAACTCAATATGTAAACCAATAACACTTCCATTACAAATCCAATATCAATGATTATGCTAGAGATACTTACAAGA
GAGAAGACATTATATGAAGATATTATGGCCATATAAAGTTCAACATGCTATGAAAGAGTCATGAGTGTGATTATACATATAAATTAGCCAATAGGCCAATXXXXXXXXXXACATATAAGAACCCCTACAACATAATCAACAACTCAATATGTAAACCAATAACACTTCCATTACAAATCCAATATCAATGATTATGCTAGAGAT----ACAAGA
>Marker157398
GGCTGCATTGAGCCTTGGTGCTCCTACACTAGGGATCTCTGGTTAATGTTGTTGCCCATGTCTCCTTATAGTAACTTCTCTTATGCATGTGTTCTCAGATXXXXXXXXXXTTTAATCTACGCATTTGGAAGTAGATTTAGGTGATTAAGTTTTGCATTGCATGATGTGATATTATCTTGGAAAGGGAACCACATTGGTTATGGAAATAAA
GGCTGCATTGAGCCTTGGTGCTCCTACACCAGGGATCTCTGGTTAATGTTGTTGCCCATGTCTCCTTATAGTAACTTCTCTTATGCATGTGTTCTCAGATXXXXXXXXXXTTTAATCTACGCATTTGGAAGTAGATTTAGGTGATTAAGTTTTGCATTGCATGATGTGATATTATCTTGGAAAGGGAATCACATTGGTTATGGAAATAAA
* *
>Marker250962
AAATATGTGTTAGGTCATCTCATAAAGACTAGTAAAGAGGGTGAAAAGATGGAATTTGAAATAACTCCTTGAATTTTGGAGGTCATTTCCATGCTCTTTAXXXXXXXXXXGTTAATTTTACTATTACATTTTTCATTCACCTTGATGTGCTTGTGAATCTAACATGGGCATGCATTTCAAAGTATATGAAAATTCTCAACCAACATGAAA
AAATATGTGTTAGGTCATCTCATAATGACTAGTAAAGAGGGTGAAAAGATGGAATTTGAAATAACTTCTTGAATTTTGGAGGTCATTTCCATGCTCTTTAXXXXXXXXXXGTTAATTTTACTATTACATTTTTCATTCACCTTGATGTGCTTGTGAATCTAACATGGGCATGCATTTCAAAGTATATGAAAATTCTCAACCAACATGAAA
* *
>Marker622304
CTGAATTTTTAGGCCTTTCCAGAGTTTTTATCAGTGTGTTGTATTCATAATTGGAAGAATCTGCATAACTTAGCATTTGGTTTACCTAAAATAGGAAAATXXXXXXXXXXCTCTTGATGCATTTGTAATTTTGATAAAATTACCTAAGTTGATGATTTAGCATGCACACATATTTTTTGCCAGTTTGTCCCATATATCTTTTCTTCTTTT
[truncated: 910 more rows]

## Sheet: LG5
>Marker285083
[truncated: 777 more rows]

## Sheet: LG6
>Marker27478
[truncated: 1,074 more rows]

## Sheet: LG7
>Marker126872
[truncated: 971 more rows]

## Sheet: LG8
>Marker19065
[truncated: 1,147 more rows]

## Sheet: LG9
>Marker2623
[truncated: 1,064 more rows]

## Sheet: LG10
>Marker106344
[truncated: 389 more rows]

[truncated: 1 more sheets: LG11]
