# Supplementary material
Source: MDPI journal article supplement (https://www.mdpi.com/1999-4907/14/8/1591)
Supplement: s1 [file s1 › File S7 Phenotype data of F1 offspring individuals.xlsx]

## Sheet: Sheet1
Plant accession	Diameter at breast height（cm）	heartwood diameter（cm）	heartwood proportion（%）	heartwood a∗	heartwood b∗	heartwood L∗	sapwood a∗	sapwoodb∗	sapwood L∗
Z01	19.925	13.183	66.1631	10.3146	17.7934	70.0192	5.5653	15.218	81.0637
Z02	15.241	7.365	48.3236	9.5074	19.5416	70.5684	4.9203	15.7683	81.8593
Z03	12.455	5.486	44.0466	10.728	21.2012	70.7482	4.7777	15.911	83.4477
Z09	13.084	8.34	63.742	8.9597	17.649	71.7348	5.46	15.4448	82.4107
Z10	18.062	8.822	48.8429	9.9322	18.1292	69.1962	5.0377	15.267	82.1173
Z11	15.17	8.588	56.6117	8.5924	16.396	72.8194	3.7747	13.3117	80.6767
Z12	18.314	9.514	51.9493	8.06	17.2596	72.7444	5.3527	16.014	82.8977
Z13	12.588	7.316	58.1188	9.6776	17.46	69.9742	5.954	15.3287	80.6317
Z14	15.737	10.031	63.7415	8.4688	17.3076	74.9504	4.2237	14.408	83.5337
Z15	16.696	9.074	54.3483	8.7594	17.7614	73.1234	5.052	15.3037	82.4223
Z16	18.015	10.165	56.4252	8.3232	16.145	78.201	4.7577	14.5743	85.0133
Z17	15.879	9.334	58.782	8.797	17.2108	72.781	4.831	15.537	82.7913
Z18	19.28	10.93	56.6909	7.37	16.1772	76.1002	5.5677	15.7233	80.661
Z19	14.46	6.8	47.0263	8.9768	18.695	71.6684	5.778	16.6867	81.7957
Z20	18.682	10.237	54.7961	7.7118	16.4048	76.4812	5.3317	15.8107	80.106
Z21	13.55	8.631	63.6974	8.4202	17.001	72.4556	5.9263	15.9457	80.8947
Z22	16.178	10.632	65.7189	8.7438	17.7166	74.345	5.0003	15.5507	82.561
Z23	15.772	8.504	53.9183	8.3346	17.4308	74.9692	5.067	15.245	82.667
Z24	18.836	11.129	59.0837	8.6816	16.9526	72.8856	4.837	14.8763	83.04
Z25	17.257	8.291	48.0443	9.0716	18.4994	73.6704	3.751	14.8577	83.345
Z26	11.514	5.688	49.4007	8.205	16.0262	77.2006	4.1507	13.8077	86.4013
Z27	18.975	10.299	54.2767	10.2068	18.8162	68.1908	5.453	16.0476	82.0038
Z28	20.344	11.032	54.2273	8.7062	17.3142	71.476	5.8947	16.3497	82.613
Z29	22.22	14.737	66.3231	8.6004	17.6204	73.9082	6.098	17.1823	82.352
Z30	14.142	7.33	51.8314	8.1342	17.1096	73.6114	5.1543	15.6993	82.8197
Z31	14.418	9.306	64.5443	8.4784	17.7978	73.1508	6.553	17.5517	80.4193
Z32	10.587	4.074	38.4812	8.1586	17.7226	73.4366	4.2047	14.0927	83.7527
Z33	7.687	3.926	51.0732	9.122	18.8318	70.8112	5.6907	16.1733	81.6427
Z34	12.933	6.069	46.9265	7.3392	15.8054	73.917	4.1423	14.3563	84.141
Z35	16.51	11.04	66.8686	8.6914	16.4936	70.6182	4.9853	15.6243	82.3303
Z36	25.142	16.872	67.1068	9.7258	19.2504	65.9512	6.499	17.569	80.0713
Z37	17.595	12.351	70.1961	8.5372	16.9556	70.2664	6.3943	17.418	80.1507
Z38	15.772	9.644	61.1463	7.671	16.467	73.2212	5.137	14.765	80.434
Z39	14.85	9.154	61.6431	8.6996	18.259	72.7092	5.203	16.5363	81.3623
Z40	22.874	15.282	66.8095	8.7002	17.1908	70.3274	5.543	16.5573	80.9933
Z41	8.667	4.75	54.8056	10.6028	19.1572	68.5216	5.903	15.8257	82.791
Z42	17.724	9.838	55.5067	9.5928	18.128	72.216	5.7017	15.6383	80.8187
Z43	7.55	3.467	45.9205	9.3568	17.9592	72.717	6.2243	15.2943	80.2477
Z44	15.186	10.16	66.9037	9.8198	18.1784	67.117	5.2433	15.194	82.5147
Z45	12.218	5.98	48.9442	8.661	16.4568	73.4578	5.4363	15.6777	82.344
Z46	12.395	6.472	52.2146	9.4934	18.8224	71.2646	5.9407	15.5243	82.973
Z47	12.219	6.11	50.0041	10.1898	19.1816	68.9144	6.3037	15.47	80.7787
Z48	10.527	4.125	39.185	10.621	18.5688	67.7476	6.031	15.3567	81.6773
Z49	18.474	9.934	53.7729	9.1427	18.0873	69.151	6.319	15.5187	81.0403
Z50	16.24	7.8	48.0296	7.8864	16.2464	76.203	5.6323	15.3823	80.8623
Z51	6.151	2.618	42.5622	9.2178	18.274	71.6216	4.6663	14.7657	83.4253
Z52	9.038	3.916	43.3282	9.718	18.7296	72.7656	5.9487	15.48	82.0097
Z53	14.609	7.314	50.065	10.0148	17.993	69.3462	5.4467	15.3737	80.6013
Z54	9.166	3.878	42.3085	8.4618	16.8186	73.954	5.2457	14.7377	82.3413
Z55	16.952	10.16	59.9339	10.0048	18.0522	68.2242	6.724	16.9833	80.2337
Z56	10.874	4.8	44.142	9.9824	17.7602	71.2222	5.645	15.8097	81.557
Z57	11.683	5.725	49.0028	9.6342	17.711	70.846	4.448	14.0957	83.3277
Z58	12.088	5.791	47.907	9.9766	17.7688	68.0714	6.064	15.681	80.647
Z59	11.527	4.22	36.6097	8.5922	17.4282	70.6534	6.1463	15.6087	80.583
Z60	19.244	14.78	76.8032	7.9493	16.043	72.6845	5.1787	14.8197	83.2057
Z62	18.596	10.44	56.1411	8.6046	16.5492	75.9374	5.268	14.268	83.511
Z63	14.952	9.16	61.2627	8.9394	17.799	75.8004	5.948	15.7323	82.358
Z64	17.1	8.559	50.0526	8.832	16.1768	73.8544	6.2413	15.4697	83.921
Z65	15.325	8.211	53.5791	7.9992	16.3984	71.7084	6.086	15.227	83.9813
Z66	7.487	4.9	65.4468	9.4558	18.9906	70.407	5.5237	16.195	80.6027
Z67	14.64	7.378	50.3962	8.9368	16.2624	70.542	4.5127	13.9707	84.8707
Z68	19.073	13.14	68.8932	8.94	16.4342	73.6562	6.625	16.4527	83.0337
Z69	16.07	9.799	60.977	9.1102	17.3986	73.5218	5.485	15.0513	84.6383
Z70	13.7	9.537	69.6131	8.998	17.4922	72.731	6.7067	16.0333	79.4033
Z71	10.07	5.294	52.572	8.666	15.8686	74.6912	5.9563	14.872	84.241
Z72	6.72	4.6	69.2629	10.1022	18.3318	76.4104	4.011	13.1733	85.7673
Z73	6.878	3.196	46.467	8.8174	16.686	77.1488	4.6427	13.8717	85.5537
Z74	5.403	3.118	57.7087	9.133	16.864	73.7396	5.2137	14.675	83.3797
Z75	10.638	5.786	54.3899	8.8718	15.729	73.6126	6.1337	14.413	83.1763
Z76	6.79	4.4	64.8012	8.5152	15.4548	74.8558	5.044	13.052	84.3203
